# Supplementary material for: Genome and Transcriptome Analysis of the Basidiomycetous Yeast Pseudozyma antarctica Producing Extracellular Glycolipids, Mannosylerythritol Lipids
Source: PubMed Central journal article supplement (PMC3933340; doi:10.1371/journal.pone.0086490), 2014-02-24

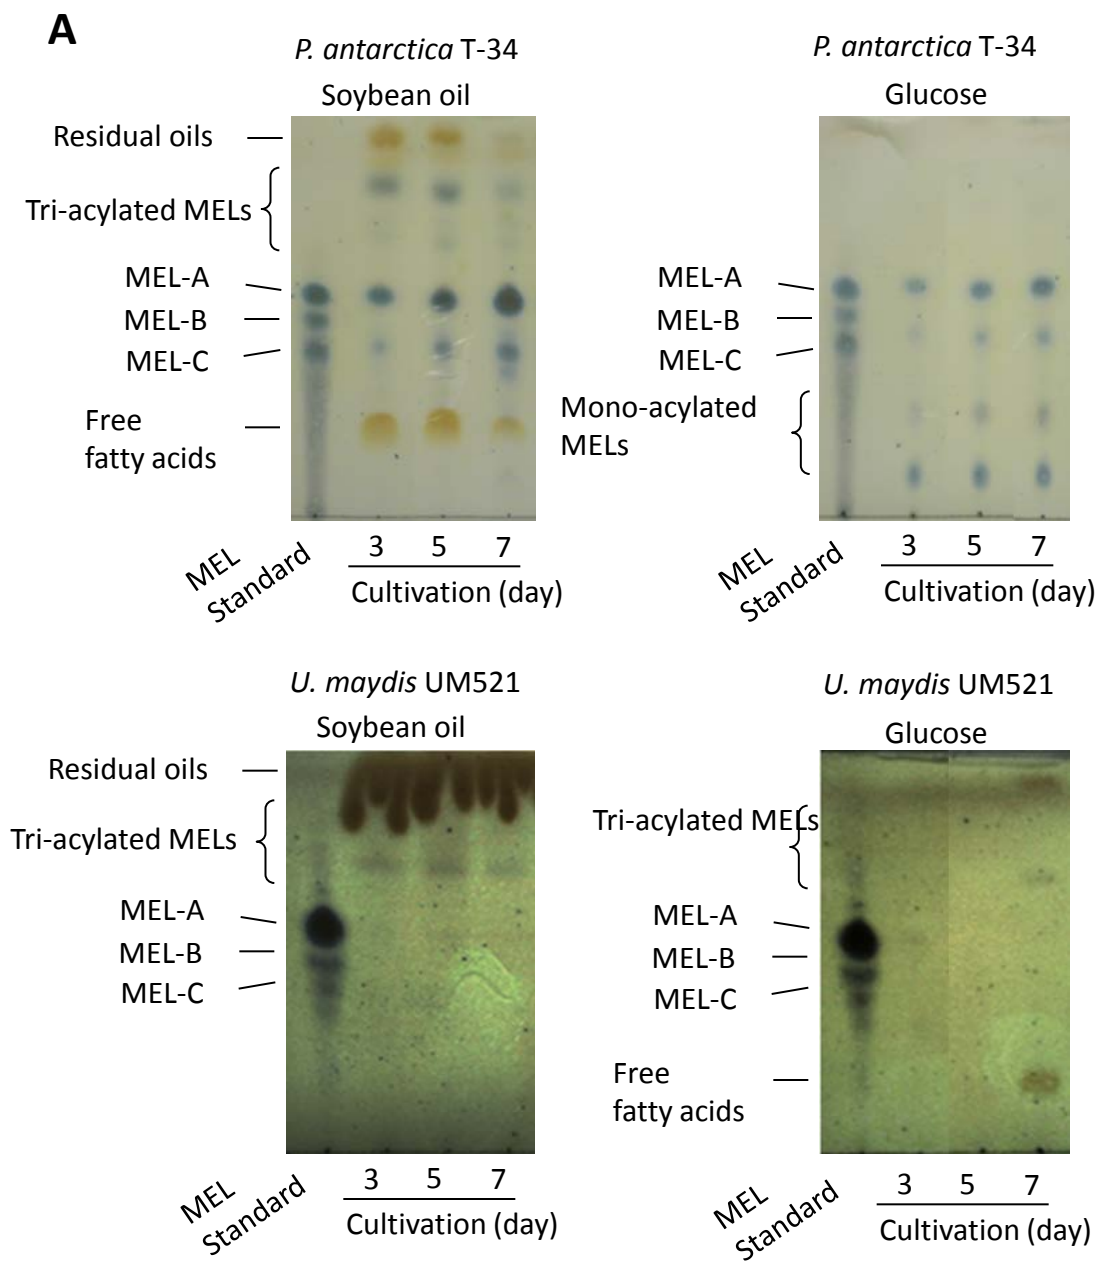

**B**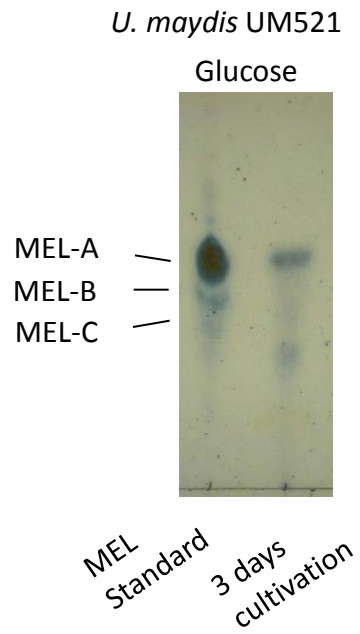**C**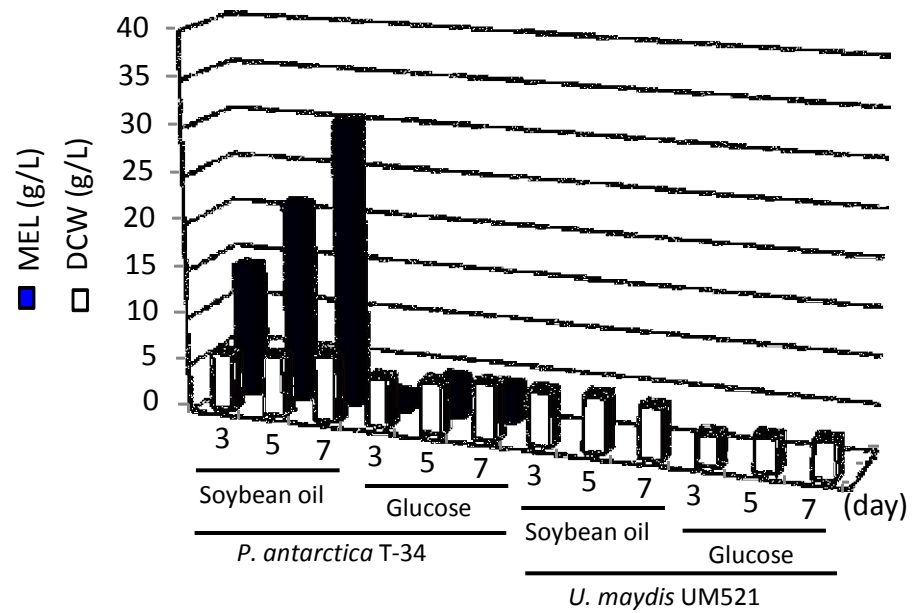

Supplement: pone.0086490.s001.pdf [file pone.0086490.s001.pdf]
