# Supplementary material for: Genome and Transcriptome Analysis of the Basidiomycetous Yeast Pseudozyma antarctica Producing Extracellular Glycolipids, Mannosylerythritol Lipids
Source: PubMed Central journal article supplement (PMC3933340; doi:10.1371/journal.pone.0086490), 2014-02-24
Supplement: pone.0086490.s002.pdf [file pone.0086490.s002.pdf]

## Supplementary Table S1

Comparison of the number of genes between *P. antarctica* and *S. cerevisiae* on the basis of KOG classification

| # Description                                                   | <i>S. cerevisiae</i><br>The number of genes | <i>P. antarctica</i><br>The number of genes |
|-----------------------------------------------------------------|---------------------------------------------|---------------------------------------------|
| <u>Metabolism</u>                                               |                                             |                                             |
| E Amino acid transport and metabolism                           | 215                                         | 204                                         |
| G Carbohydrate transport and metabolism                         | 285                                         | 172                                         |
| H Coenzyme transport and metabolism                             | 90                                          | 78                                          |
| P Inorganic ion transport and metabolism                        | 144                                         | 91                                          |
| I Lipid transport and metabolism                                | 140                                         | 219                                         |
| F Nucleotide transport and metabolism                           | 87                                          | 63                                          |
| Q Secondary metabolites biosynthesis, transport and catabolism  | 67                                          | 124                                         |
| C Energy production and conversion                              | 200                                         | 206                                         |
| <u>Cellular processes and signaling</u>                         |                                             |                                             |
| D Cell cycle control, cell division, chromosome partitioning    | 199                                         | 139                                         |
| N Cell motility                                                 | 1                                           | 3                                           |
| M Cell wall/membrane/envelope biogenesis                        | 69                                          | 48                                          |
| Z Cytoskeleton                                                  | 104                                         | 95                                          |
| V Defense mechanisms                                            | 45                                          | 31                                          |
| W Extracellular structures                                      | 18                                          | 4                                           |
| U Intracellular trafficking, secretion, and vesicular transport | 351                                         | 256                                         |
| Y Nuclear structure                                             | 90                                          | 24                                          |
| O Posttranslational modification, protein turnover, chaperones  | 471                                         | 373                                         |
| T Signal transduction mechanisms                                | 342                                         | 291                                         |
| <u>Information storage and processing</u>                       |                                             |                                             |
| B Chromatin structure and dynamics                              | 106                                         | 78                                          |
| A RNA processing and modification                               | 219                                         | 203                                         |
| L Replication, recombination and repair                         | 174                                         | 164                                         |
| K Transcription                                                 | 312                                         | 216                                         |
| J Translation, ribosomal structure and biogenesis               | 381                                         | 287                                         |
| <u>Poorly characterized</u>                                     |                                             |                                             |
| S Function unknown                                              | 309                                         | 244                                         |
| R General function prediction only                              | 605                                         | 588                                         |
