# Supplementary material for: Genome and Transcriptome Analysis of the Basidiomycetous Yeast Pseudozyma antarctica Producing Extracellular Glycolipids, Mannosylerythritol Lipids
Source: PubMed Central journal article supplement (PMC3933340; doi:10.1371/journal.pone.0086490), 2014-02-24
Supplement: pone.0086490.s003.pdf [file pone.0086490.s003.pdf]

## Supplementary Table S2

*P. antarctica* genes related to predicted lipogenesis pathway, homologous to *S. cerevisiae*, *A. oryzae* and *R. oryzae* genes

| Predicted lipogenesis pathway                   | EC_name    | <i>S. cerevisiae</i> genes | <i>A. oryzae</i> genes<br><i>R. oryzae</i> gene | <i>P. antarctica</i> genes; Cover_ratio>0.8                    | Ref         |
|-------------------------------------------------|------------|----------------------------|-------------------------------------------------|----------------------------------------------------------------|-------------|
| <b>pentose phosphate pathway</b>                |            |                            |                                                 |                                                                |             |
| glucose-6-phosphate 1-dehydrogenase             | EC1.1.1.49 | YNL241C                    |                                                 | 3d00023                                                        | YC*         |
| 6-phosphogluconolactonase                       | EC3.1.1.31 | YHR163W                    |                                                 | 10d00035                                                       | YC*         |
| 6-phosphogluconolactonase                       | EC3.1.1.31 | YGR248W                    |                                                 | 10d00035                                                       | YC*         |
| phosphogluconate dehydro-genase (major)         | EC1.1.1.44 | YHR183W                    |                                                 | 5c00123                                                        | YC*         |
| phosphogluconate dehydro-genase (minor)         | EC1.1.1.44 | YGR256W                    |                                                 | 5c00123                                                        | YC*         |
| ribose 5-phosphate isomerase                    | EC5.3.1.6  | YOR095C                    |                                                 | 18c00079                                                       | YC*         |
| ribulose-5-phosphate-3-epimerase                | EC5.1.3.1  | YJL121C                    |                                                 | 26c00050                                                       | YC*         |
| transketolase (major)                           | EC2.2.1.1  | YPR074C                    |                                                 | 1c00048                                                        | YC*         |
| transketolase (minor)                           | EC2.2.1.1  | YBR117C                    |                                                 | 1c00048                                                        | YC*         |
| transaldolase                                   | EC2.2.1.2  | YLR354C                    |                                                 | 18c00087                                                       | YC*         |
| <b>glycolysis</b>                               |            |                            |                                                 |                                                                |             |
| Hexokinase                                      | EC2.7.1.1  | YFR053C                    |                                                 | 19d00014, 6d00069                                              | YC*         |
| Hexokinase                                      | EC2.7.1.1  | YGL253W                    |                                                 | 19d00014, 6d00069                                              | YC*         |
| glucokinase                                     | EC2.7.1.2  | YCL040W                    |                                                 | 6d00069, 19d00014                                              | YC*         |
| glucose-6-phosphate isomerase                   | EC5.3.1.9  | YBR196C                    |                                                 | 13c00058                                                       | YC*         |
| phosphofructokinase (alpha)                     | EC2.7.1.11 | YGR240C                    |                                                 |                                                                | YC*         |
| phosphofructokinase (beta)                      | EC2.7.1.11 | YMR205C                    |                                                 |                                                                | YC*         |
| fructose-bisphosphatase                         | EC3.1.3.11 | YLR377C                    |                                                 | 5d00053                                                        | YC*         |
| aldolase A fructose-bisphosphate                | EC4.1.2.13 | YKL060C                    |                                                 | 9d00334                                                        | YC*         |
| glyceraldehyde 3-phosphate dehydrogenase (stati | EC1.2.1.12 | YJL052W                    |                                                 | 12c00136                                                       | YC*         |
| glyceraldehyde 3-phosphate dehydrogenase        | EC1.2.1.12 | YJR009C                    |                                                 | 12c00136                                                       | YC*         |
| glyceraldehyde 3-phosphate dehydrogenase        | EC1.2.1.12 | YGR192C                    |                                                 | 12c00136                                                       | YC*         |
| phosphoglycerate kinase                         | EC2.7.2.3  | YCR012W                    |                                                 | 26c00011                                                       | YC*         |
| triose-phosphate isomerase                      | EC5.3.1.1  | YDR050C                    |                                                 | 14d00042                                                       | YC*         |
| phosphoglycerate mutase                         | EC5.4.2.1  | YKL152C                    |                                                 | 15d00053                                                       | YC*         |
| enolase                                         | EC4.2.1.11 | YGR254W                    |                                                 | 14d00015                                                       | YC*         |
| enolase                                         | EC4.2.1.11 | YHR174W                    |                                                 | 14d00015                                                       | YC*         |
| pyruvate kinase                                 | EC2.7.1.40 | YOR347C                    |                                                 | 9d00083                                                        | YC*         |
| pyruvate kinase                                 | EC2.7.1.40 | YAL038W                    |                                                 | 9d00083                                                        | YC*         |
| lactate dehydrogenase                           | EC1.1.1.27 | YDL174C                    |                                                 | 7d00256                                                        | YC*         |
| lactate dehydrogenase                           | EC1.1.1.27 | YDL178W                    |                                                 | 12d00055, 7d00256                                              | YC*         |
| phosphoenolpyruvate carboxykinase               | EC4.1.1.32 | YKR097W                    |                                                 | 2d00021                                                        | YC*         |
| <b>fatty acid synthesis</b>                     |            |                            |                                                 |                                                                |             |
| acetyl-CoA carboxylase                          | EC6.4.1.2  | YNR016C                    |                                                 | 27c00072                                                       | YC*         |
| acetyl-CoA carboxylase (mito)                   | EC6.4.1.2  | YMR207C                    |                                                 | 27c00072                                                       | YC*         |
| fatty acid synthase (beta subunit)              | EC2.3.1.86 | YKL182W                    |                                                 | 19c00074                                                       | YC*         |
| fatty acid synthase (alpha subunit)             | EC2.3.1.86 | YPL231W                    |                                                 | 15d00092, 19c00074                                             | YC*         |
| putative fatty acid sythetase (mito)            | EC2.3.1.86 | YOR221C                    |                                                 |                                                                | YC*         |
| putative fatty acid sythetase (mito)            | EC2.3.1.86 | YER061C                    |                                                 | 15d00093, 19c00074, 15d00089, 1c00034                          | YC*         |
| putative fatty acid sythetase (mito)            | EC2.3.1.86 | YKL055C                    |                                                 | 8d00015                                                        | YC*         |
| fatty acid elongase                             | EC2.3.1.-  | YJL196C                    |                                                 | 13c00047                                                       | YC*         |
| acyl-CoA thioesterase                           | EC3.1.2.27 |                            | AO090012000721                                  | 25c00010                                                       | Tamano [38] |
| <b>malate/pyruvate cycle</b>                    |            |                            |                                                 |                                                                |             |
| malic enzyme                                    | EC1.1.1.40 | YKL029C                    |                                                 | 7c00096                                                        | YC*         |
| pyruvate carboxylase                            | EC6.4.1.1  | YGL062W                    |                                                 | 7d00254                                                        | YC*         |
| pyruvate carboxylase                            | EC6.4.1.1  | YBR218C                    |                                                 | 7d00254                                                        | YC*         |
| ATP-citrate lyase (subunit 1)                   | EC2.3.3.8  |                            | AO090023000205                                  | 7c00266                                                        | Tamano [38] |
| ATP-citrate lyase (subunit 2)                   | EC2.3.3.8  |                            | AO090023000206                                  | 7c00266                                                        | Tamano [38] |
| Acetyl-CoA synthetase                           | EC6.2.1.1  | YLR153C                    |                                                 | 19d00026, 9c00217, 2d00022, 9d00141, 7c00326, 7d00009, 2d00039 | YC*         |
| Acetyl-CoA synthetase                           | EC6.2.1.1  | YAL054C                    |                                                 | 19d00026, 9c00217, 2d00022, 7c00326, 2d00039                   | YC*         |
| <b>tricarboxylic acid cycle</b>                 |            |                            |                                                 |                                                                |             |
| pyruvate dehydrogenase E1 (subB)                | EC1.2.4.1  | YBR221C                    |                                                 | 20d00018, 5d00012                                              | YC*         |
| pyruvate dehydrogenase (E1 alpha)               | EC1.2.4.1  | YER178W                    |                                                 | 10d00008, 25c00043                                             | YC*         |
| dihydrolipoamideacetyltransferase (E2)          | EC2.3.1.12 | YNL071W                    |                                                 | 9c00324, 14c00100                                              | YC*         |
| Dihydrolipoamide dehydrogenase (sub E3)         | EC1.2.4.1  | YFL018C                    |                                                 | 12c00126, 7c00197                                              | YC*         |
| citrate synthase                                | EC2.3.3.1  | YNR001C                    |                                                 | 22c00098                                                       | YC*         |
| citrate synthase (iso)                          | EC2.3.3.1  | YPR001W                    |                                                 | 22c00098                                                       | YC*         |
| aconitase                                       | EC4.2.1.3  | YLR304C                    |                                                 | 19d00127, 5c00060                                              | YC*         |
| aconitase                                       | EC4.2.1.3  | YJL200C                    |                                                 | 5c00060, 19d00127                                              | YC*         |
| isocitrate dehydrogenase (sub)                  | EC1.1.1.41 | YNL037C                    |                                                 | 12c00053, 12d00048, 26d00008, 9c00226, 16c00084, 7d00148       | YC*         |

|                                                 |                      |                |                                                                                                |                   |
|-------------------------------------------------|----------------------|----------------|------------------------------------------------------------------------------------------------|-------------------|
| isocitrate dehydrogenase (sub                   | EC1.1.1.41           | YOR136W        | 12d00048, 12c00053, 26d00008, 9c00226, 16c00084                                                | YC*               |
| 2-oxoglutarate dehydrogenase                    | EC1.2.4.2            | YIL125W        | 11c00079                                                                                       | YC*               |
| dihydrolypoamidesuccinyltransferase             | EC2.3.1.61           | YDR148C        | 22d00047                                                                                       | YC*               |
| succinyl-CoA ligase (subA)                      | EC6.2.1.4, EC6.2.1.5 | YOR142W        | 22d00119, 22c00256                                                                             | YC*               |
| succinyl-CoA ligase (subB)                      | EC6.2.1.4, EC6.2.1.5 | YGR244C        | 9d00182                                                                                        | YC*               |
| succinate dehydrogenase (sub)                   | EC1.3.5.1            | YKL148C        | 7d00183                                                                                        | YC*               |
| succinate dehydrogenase (minor)                 | EC1.3.5.1            | YJL045W        | 7d00183                                                                                        | YC*               |
| succinate dehydrogenase (sub)                   | EC1.3.5.1            | YLL041C        | 7c00348                                                                                        | YC*               |
| succinate dehydrogenase (sub)                   | EC1.3.5.1            | YKL141W        | 13c00067                                                                                       | YC*               |
| succinate dehydrogenase (sub)                   | EC1.3.5.1            | YDR178W        |                                                                                                | YC*               |
| fumarase                                        | EC4.2.1.2            | YPL262W        | 9d00400                                                                                        | YC*               |
| malate dehydrogenase                            | EC1.1.1.37           | YKL085W        | 9c00225                                                                                        | YC*               |
| malate dehydrogenase (cytosolic)                | EC1.1.1.37           | YOL126C        | 9c00225                                                                                        | YC*               |
| malate dehydrogenase (peroxisome)               | EC1.1.1.37           | YDL078C        | 9c00225                                                                                        | YC*               |
| <b>peroxisomal beta-oxidation</b>               |                      |                |                                                                                                |                   |
| fatty acyl-coenzyme A synthetase (long chain)   | EC6.2.1.3            | YMR246W        | 10c00058                                                                                       | YC*               |
| fatty acyl-coenzyme A synthetase (long chain)   | EC6.2.1.3            | YOR317W        | 10c00058, 16c00012                                                                             | YC*               |
| fatty acyl-coenzyme A synthetase (long chain)   | EC6.2.1.3            | YBR041W        | 5d00115, 22c00012, 7c00326, 6c00032                                                            | YC*               |
| fatty acyl-coenzyme A synthetase                | EC6.2.1.3            | YER015W        | 16c00012, 10c00058                                                                             | YC*               |
| fatty acyl-coenzyme A synthetase                | EC6.2.1.3            | YIL009W        | 10c00058, 16c00012                                                                             | YC*               |
| Fatty acyl-coenzyme A oxidase                   | EC1.3.3.6            | YGL205W        | 3d00016                                                                                        | YC*               |
| Peroxisomal multifunctional b-oxidation protein | EC4.2.1.74           | YKR009C        | 9d00080                                                                                        | YC*               |
| 3-Ketoacyl thiolase                             | EC2.3.1.16           | YIL160C        | 5c00047, 7d00227, 22d00199, 14c00041                                                           | YC*               |
| acyl-CoA thioesterase                           | EC3.1.2.2            | YJR019C        | 9c00187                                                                                        | YC*               |
| <b>mitochondrial beta-oxidation</b>             |                      |                |                                                                                                |                   |
| Acyl-CoA dehydrogenase                          | EC1.3.99.-           | AO090005000482 | 9c00077                                                                                        | Microbiology [37] |
| Acyl-CoA dehydrogenase                          | EC1.3.99.-           | AO090023000711 | 22c00013, 10c00046, 26d00031                                                                   | Microbiology [37] |
| 3-Hydroxyacyl-CoA dehydrogenase (LCHAD)         | EC1.1.1.35           | AO090206000053 | 6c00105, 7c00216, 15c00001                                                                     | Microbiology [37] |
| Enoyl-CoA hydratase                             | EC4.2.1.17           | AO090011000537 | 3d00051, 22d00252, 22d00236, 24d00001, 6c00098, 14d00106, 1c00016                              | Microbiology [37] |
| Acetyl-CoA acetyltransferase                    | EC2.3.1.9            | AO090103000406 | 14c00041, 22d00199, 7d00227, 5c00047, 8d00008                                                  | Microbiology [37] |
| 3-Hydroxyacyl-CoA dehydrogenase (zHAD)          | EC1.1.1.35           | RO3G_10340     | 18c00036, 27c00018, 12c00049, 20c00015, 22d00143, 9d00328, 7d00314, 9c00142, 2c00059, 24c00050 | Microbiology [37] |

\*SGD database (<http://www.yeastgenome.org>)
