# Supplementary material for: Genome and Transcriptome Analysis of the Basidiomycetous Yeast Pseudozyma antarctica Producing Extracellular Glycolipids, Mannosylerythritol Lipids
Source: PubMed Central journal article supplement (PMC3933340; doi:10.1371/journal.pone.0086490), 2014-02-24
Supplement: pone.0086490.s004.pdf [file pone.0086490.s004.pdf]

## Supplementary Table S3

Analysis of the orthologous genes between *P. antarctica* and *U. maydis*

|                  | Pa to Um                     |                          |           | Um to Pa                     |                          |           |
|------------------|------------------------------|--------------------------|-----------|------------------------------|--------------------------|-----------|
|                  | <i>P. antarctica</i><br>gene | <i>U. maydis</i><br>gene | e-value   | <i>P. antarctica</i><br>gene | <i>U. maydis</i><br>gene | e-value   |
| NNN <sup>1</sup> | 1d00043                      | um01656                  | 2.00E-44  | um01656                      | 22c00121                 | 0         |
| NNN              | 1c00005                      | um06368                  | 8.00E-30  | um06368                      | 1c00004                  | 1.00E-135 |
| BBH <sup>2</sup> | 1c00018                      | um06383                  | 0         | um06383                      | 1c00018                  | 0         |
| BBH              | 1c00013                      | um10993                  | 3.00E-44  | um10993                      | 1c00013                  | 3.00E-36  |
| BBH              | 1d00007                      | um06359                  | 8.00E-63  | um06359                      | 1d00007                  | 1.00E-68  |
| BBH              | 1d00039                      | um06450                  | 1.00E-179 | um06450                      | 1d00039                  | 1.00E-179 |
| BBH              | 1d00020                      | um06404                  | 1.00E-125 | um06404                      | 1d00020                  | 1.00E-125 |
| BBH              | 1d00016                      | um06397                  | 1.00E-33  | um06397                      | 1d00016                  | 6.00E-28  |
| NNN              | 1c00033                      | um06418                  | 1.00E-101 | um06418                      | 1c00034                  | 0         |
| BBH              | 1c00025                      | um06398                  | 7.00E-97  | um06398                      | 1c00025                  | 1.00E-101 |
| BBH              | 1d00029                      | um06421                  | 0         | um06421                      | 1d00029                  | 0         |
| BBH              | 1d00006                      | um12336.2                | 0         | um12336.2                    | 1d00006                  | 0         |
| BBH              | 1c00010                      | um06363                  | 0         | um06363                      | 1c00010                  | 0         |
| BBH              | 1c00016                      | um11001                  | 1.00E-94  | um11001                      | 1c00016                  | 7.00E-99  |
| BBH              | 1d00036                      | um12046                  | 7.00E-19  | um12046                      | 1d00036                  | 1.00E-19  |
| BBH              | 1c00019                      | um06385                  | 1.00E-104 | um06385                      | 1c00019                  | 1.00E-105 |
| NNN              | 1d00031                      | um04032                  | 7.00E-25  | um04032                      | 13c00090                 | 0         |
| BBH              | 1d00017                      | um06400                  | 0         | um06400                      | 1d00017                  | 0         |
| BBH              | 1d00048                      | um06454                  | 1.00E-122 | um06454                      | 1d00048                  | 1.00E-111 |
| BBH              | 1d00050                      | um06456                  | 0         | um06456                      | 1d00050                  | 0         |
| BBH              | 1d00021                      | um06406                  | 4.00E-79  | um06406                      | 1d00021                  | 5.00E-81  |
| BBH              | 1c00007                      | um06371                  | 0         | um06371                      | 1c00007                  | 0         |
| BBH              | 1d00013                      | um06391                  | 0         | um06391                      | 1d00013                  | 0         |
| BBH              | 1c00041                      | um06440                  | 1.00E-136 | um06440                      | 1c00041                  | 1.00E-166 |
| BBH              | 1d00027                      | um06417                  | 1.00E-136 | um06417                      | 1d00027                  | 1.00E-136 |
| NNN              | 1c00011                      | um06360                  | 1.00E-62  |                              |                          |           |
| BBH              | 1d00037                      | um06445                  | 1.00E-102 | um06445                      | 1d00037                  | 1.00E-102 |
| BBH              | 1c00017                      | um06381                  | 5.00E-75  | um06381                      | 1c00017                  | 2.00E-68  |
| BBH              | 1d00041                      | um15103                  | 3.00E-32  | um15103                      | 1d00041                  | 3.00E-62  |
| BBH              | 1d00005                      | um06362                  | 0         | um06362                      | 1d00005                  | 0         |
| BBH              | 1c00031                      | um06412                  | 0         | um06412                      | 1c00031                  | 0         |
| BBH              | 1c00047                      | um12050                  | 7.00E-58  | um12050                      | 1c00047                  | 8.00E-63  |
| BBH              | 1c00038                      | um06427                  | 1.00E-148 | um06427                      | 1c00038                  | 1.00E-139 |
| BBH              | 1c00044                      | um12047                  | 4.00E-35  | um12047                      | 1c00044                  | 2.00E-41  |
| NNN              | 1c00001                      | um01656                  | 7.00E-43  | um01656                      | 22c00121                 | 0         |
| NNN              | 1d00051                      | um02896                  | 3.00E-30  | um02896                      | 19d00125                 | 0         |
| BBH              | 1c00045                      | um12048                  | 1.00E-155 | um12048                      | 1c00045                  | 1.00E-148 |
| NNN              | 1d00004                      | um12337                  | 0         |                              |                          |           |
| BBH              | 1d00026                      | um06414                  | 0         | um06414                      | 1d00026                  | 0         |
| BBH              | 1c00014                      | um06377                  | 1.00E-123 | um06377                      | 1c00014                  | 1.00E-118 |
| BBH              | 1d00049                      | um06455                  | 6.00E-98  | um06455                      | 1d00049                  | 2.00E-97  |
| BBH              | 1c00023                      | um06394                  | 1.00E-86  | um06394                      | 1c00023                  | 2.00E-85  |
| BBH              | 1d00024                      | um06411                  | 0         | um06411                      | 1d00024                  | 0         |
| BBH              | 1c00040                      | um06434                  | 0         | um06434                      | 1c00040                  | 0         |
| BBH              | 1c00046                      | um06448                  | 3.00E-30  | um06448                      | 1c00046                  | 1.00E-30  |
| BBH              | 1d00014                      | um06395                  | 1.00E-107 | um06395                      | 1d00014                  | 1.00E-111 |
| BBH              | 1c00039                      | um06430                  | 0         | um06430                      | 1c00039                  | 0         |
| BBH              | 1c00004                      | um06368                  | 1.00E-136 | um06368                      | 1c00004                  | 1.00E-135 |
| BBH              | 1c00032                      | um11239                  | 0         | um11239                      | 1c00032                  | 0         |
| NNN              | 1d00034                      | um05038                  | 0         | um05038                      | 3c00070                  | 0         |
| BBH              | 1c00050                      | um06453                  | 1.00E-123 | um06453                      | 1c00050                  | 1.00E-123 |
| BBH              | 1c00022                      | um11005                  | 1.00E-146 | um11005                      | 1c00022                  | 1.00E-157 |
| BBH              | 1d00035                      | um06443                  | 1.00E-119 | um06443                      | 1d00035                  | 1.00E-119 |
| BBH              | 1c00042                      | um12044                  | 2.00E-20  | um12044                      | 1c00042                  | 1.00E-20  |
| BBH              | 1c00029                      | um06407                  | 0         | um06407                      | 1c00029                  | 0         |

|     |         |           |           |           |          |           |
|-----|---------|-----------|-----------|-----------|----------|-----------|
| BBH | 1d00025 | um06413   | 5.00E-76  | um06413   | 1d00025  | 2.00E-70  |
| BBH | 1c00021 | um06388   | 2.00E-44  | um06388   | 1c00021  | 2.00E-44  |
| BBH | 1c00052 | um04091   | 0         | um04091   | 1c00052  | 0         |
| BBH | 1d00002 | um10996   | 1.00E-180 | um10996   | 1d00002  | 0         |
| BBH | 1c00020 | um06387   | 1.00E-56  | um06387   | 1c00020  | 2.00E-57  |
| BBH | 1d00011 | um06386   | 1.00E-143 | um06386   | 1d00011  | 1.00E-146 |
| NNN | 1c00049 | um05861   | 1.00E-62  | um05861   | 7d00035  | 0         |
| BBH | 1c00008 | um06372   | 0         | um06372   | 1c00008  | 0         |
| BBH | 1c00006 | um06370   | 1.00E-106 | um06370   | 1c00006  | 1.00E-103 |
| NNN | 1d00032 | um06428   | 0         |           |          |           |
| BBH | 1c00030 | um06410   | 0         | um06410   | 1c00030  | 0         |
| BBH | 1c00043 | um12045   | 0         | um12045   | 1c00043  | 0         |
| BBH | 1d00012 | um06389   | 1.00E-80  | um06389   | 1d00012  | 1.00E-100 |
| NNN | 1c00048 | um04967   | 1.00E-152 | um04967   | 3d00047  | 1.00E-177 |
| BBH | 1c00028 | um06405   | 8.00E-75  | um06405   | 1c00028  | 6.00E-81  |
| BBH | 1c00037 | um06426   | 1.00E-147 | um06426   | 1c00037  | 1.00E-147 |
| BBH | 1c00015 | um06378   | 3.00E-48  | um06378   | 1c00015  | 8.00E-62  |
| BBH | 1c00009 | um06365.2 | 1.00E-139 | um06365.2 | 1c00009  | 1.00E-125 |
| BBH | 1c00027 | um11007   | 1.00E-135 | um11007   | 1c00027  | 1.00E-133 |
| NNN | 1d00044 | um04806   | 1.00E-20  | um04806   | 26c00044 | 0         |
| BBH | 1d00033 | um06429.2 | 1.00E-137 | um06429.2 | 1d00033  | 1.00E-137 |
| BBH | 1d00018 | um06401   | 0         | um06401   | 1d00018  | 0         |
| BBH | 1d00022 | um06408   | 1.00E-136 | um06408   | 1d00022  | 1.00E-136 |
| BBH | 1d00009 | um11000   | 3.00E-52  | um11000   | 1d00009  | 1.00E-52  |
| BBH | 1d00038 | um12049   | 9.00E-26  | um12049   | 1d00038  | 2.00E-26  |
| BBH | 1c00003 | um06374   | 1.00E-169 | um06374   | 1c00003  | 1.00E-174 |
| BBH | 1c00034 | um06418   | 0         | um06418   | 1c00034  | 0         |
| NNN | 1d00042 | um01656   | 7.00E-44  | um01656   | 22c00121 | 0         |
| NNN | 1c00036 | um04046   | 1.00E-31  | um04046   | 13c00097 | 0         |
| NNN | 1d00008 | um05580   | 2.00E-24  | um05580   | 9d00320  | 3.00E-37  |
| BBH | 1d00019 | um06402   | 0         | um06402   | 1d00019  | 0         |
| BBH | 1c00026 | um06399   | 1.00E-111 | um06399   | 1c00026  | 1.00E-111 |
| BBH | 1d00030 | um06425   | 1.00E-170 | um06425   | 1d00030  | 1.00E-138 |
| BBH | 1d00028 | um06420   | 0         | um06420   | 1d00028  | 0         |
| BBH | 1c00012 | um06358   | 1.00E-174 | um06358   | 1c00012  | 0         |
| BBH | 1c00035 | um06422   | 1.00E-159 | um06422   | 1c00035  | 1.00E-158 |
| NNN | 1d00045 | um11256   | 1.00E-35  |           |          |           |
| BBH | 1d00023 | um11238   | 1.00E-53  | um11238   | 1d00023  | 1.00E-53  |
| BBH | 1d00003 | um06367   | 1.00E-102 | um06367   | 1d00003  | 0         |
| BBH | 2d00054 | um05199   | 0         | um05199   | 2d00054  | 0         |
| BBH | 2c00084 | um05239   | 1.00E-177 | um05239   | 2c00084  | 1.00E-177 |
| BBH | 2d00035 | um05156   | 0         | um05156   | 2d00035  | 0         |
| BBH | 2d00011 | um05108   | 0         | um05108   | 2d00011  | 0         |
| BBH | 2c00049 | um05179   | 0         | um05179   | 2c00049  | 0         |
| BBH | 2c00079 | um05233   | 0         | um05233   | 2c00079  | 0         |
| BBH | 2c00030 | um05143   | 1.00E-163 | um05143   | 2c00030  | 1.00E-150 |
| BBH | 2c00044 | um05170   | 0         | um05170   | 2c00044  | 0         |
| BBH | 2d00073 | um11787   | 1.00E-130 | um11787   | 2d00073  | 1.00E-130 |
| BBH | 2d00009 | um05105   | 1.00E-156 | um05105   | 2d00009  | 1.00E-156 |
| BBH | 2d00047 | um05186   | 0         | um05186   | 2d00047  | 0         |
| BBH | 2c00072 | um05222   | 2.00E-81  | um05222   | 2c00072  | 3.00E-83  |
| BBH | 2c00052 | um05185   | 1.00E-174 | um05185   | 2c00052  | 1.00E-172 |
| BBH | 2d00051 | um05191.2 | 1.00E-112 | um05191.2 | 2d00051  | 1.00E-124 |
| BBH | 2c00018 | um05117   | 0         | um05117   | 2c00018  | 0         |
| NNN | 2d00004 | um05088   | 1.00E-53  |           |          |           |
| BBH | 2c00028 | um05137   | 1.00E-117 | um05137   | 2c00028  | 1.00E-120 |
| BBH | 2c00064 | um05209   | 0         | um05209   | 2c00064  | 0         |
| BBH | 2d00060 | um05208   | 0         | um05208   | 2d00060  | 0         |
| NNN | 2c00011 | um05104   | 2.00E-16  |           |          |           |
| BBH | 2c00073 | um05223   | 0         | um05223   | 2c00073  | 0         |
| BBH | 2c00083 | um05237   | 6.00E-53  | um05237   | 2c00083  | 1.00E-47  |
| BBH | 2d00048 | um10195   | 0         | um10195   | 2d00048  | 0         |

|     |         |           |           |           |         |           |
|-----|---------|-----------|-----------|-----------|---------|-----------|
| BBH | 2d00053 | um05197   | 1.00E-139 | um05197   | 2d00053 | 1.00E-139 |
| BBH | 2d00074 | um05238   | 4.00E-63  | um05238   | 2d00074 | 1.00E-76  |
| BBH | 2c00038 | um05160   | 0         | um05160   | 2c00038 | 0         |
| BBH | 2c00053 | um10194   | 7.00E-33  | um10194   | 2c00053 | 1.00E-32  |
| BBH | 2c00010 | um05101   | 0         | um05101   | 2c00010 | 0         |
| BBH | 2c00058 | um05198   | 0         | um05198   | 2c00058 | 0         |
| BBH | 2c00023 | um05126   | 0         | um05126   | 2c00023 | 0         |
| BBH | 2d00024 | um05136   | 0         | um05136   | 2d00024 | 0         |
| NNN | 2c00017 | um05115   | 0         |           |         |           |
| BBH | 2d00068 | um05225   | 8.00E-25  | um05225   | 2d00068 | 2.00E-29  |
| BBH | 2d00034 | um05153   | 0         | um05153   | 2d00034 | 0         |
| BBH | 2c00004 | um05097   | 1.00E-127 | um05097   | 2c00004 | 1.00E-131 |
| BBH | 2d00075 | um05240   | 0         | um05240   | 2d00075 | 0         |
| BBH | 2d00020 | um05127   | 1.00E-167 | um05127   | 2d00020 | 1.00E-163 |
| BBH | 2d00002 | um11779   | 0         | um11779   | 2d00002 | 0         |
| BBH | 2c00057 | um11567.2 | 2.00E-42  | um11567.2 | 2c00057 | 2.00E-42  |
| BBH | 2c00027 | um10179   | 5.00E-53  | um10179   | 2c00027 | 4.00E-53  |
| BBH | 2c00045 | um05171   | 0         | um05171   | 2c00045 | 0         |
| BBH | 2d00045 | um05182   | 2.00E-90  | um05182   | 2d00045 | 2.00E-93  |
| BBH | 2c00020 | um05122   | 0         | um05122   | 2c00020 | 0         |
| BBH | 2c00054 | um10196   | 2.00E-54  | um10196   | 2c00054 | 3.00E-55  |
| BBH | 2d00016 | um10174   | 0         | um10174   | 2d00016 | 0         |
| BBH | 2c00024 | um05128   | 2.00E-40  | um05128   | 2c00024 | 4.00E-41  |
| BBH | 2c00037 | um05158   | 0         | um05158   | 2c00037 | 0         |
| BBH | 2d00019 | um05125   | 0         | um05125   | 2d00019 | 0         |
| BBH | 2c00026 | um05132   | 0         | um05132   | 2c00026 | 1.00E-168 |
| BBH | 2d00033 | um05151   | 1.00E-113 | um05151   | 2d00033 | 1.00E-142 |
| BBH | 2c00056 | um05194   | 0         | um05194   | 2c00056 | 0         |
| BBH | 2c00016 | um05114   | 0         | um05114   | 2c00016 | 0         |
| BBH | 2c00003 | um10170   | 0         | um10170   | 2c00003 | 0         |
| BBH | 2d00061 | um05210   | 3.00E-95  | um05210   | 2d00061 | 1.00E-94  |
| BBH | 2c00031 | um10183   | 1.00E-141 | um10183   | 2c00031 | 1.00E-148 |
| BBH | 2d00046 | um05184   | 1.00E-102 | um05184   | 2d00046 | 1.00E-105 |
| BBH | 2c00046 | um05173   | 0         | um05173   | 2c00046 | 0         |
| BBH | 2d00010 | um10173   | 5.00E-67  | um10173   | 2d00010 | 3.00E-68  |
| BBH | 2c00043 | um05166   | 0         | um05166   | 2c00043 | 0         |
| BBH | 2c00055 | um10198   | 0         | um10198   | 2c00055 | 0         |
| BBH | 2d00008 | um05103   | 0         | um05103   | 2d00008 | 0         |
| BBH | 2c00060 | um05202   | 1.00E-114 | um05202   | 2c00060 | 1.00E-114 |
| BBH | 2c00075 | um05226   | 6.00E-46  | um05226   | 2c00075 | 7.00E-55  |
| BBH | 2c00002 | um05090   | 1.00E-116 | um05090   | 2c00002 | 1.00E-118 |
| BBH | 2d00069 | um05227   | 1.00E-91  | um05227   | 2d00069 | 1.00E-91  |
| BBH | 2c00025 | um10178   | 4.00E-19  | um10178   | 2c00025 | 4.00E-24  |
| BBH | 2c00067 | um05213   | 0         | um05213   | 2c00067 | 0         |
| BBH | 2c00074 | um15076   | 3.00E-15  | um15076   | 2c00074 | 1.00E-18  |
| BBH | 2d00007 | um05102   | 5.00E-27  | um05102   | 2d00007 | 5.00E-27  |
| BBH | 2d00056 | um05201   | 1.00E-146 | um05201   | 2d00056 | 1.00E-147 |
| BBH | 2c00032 | um05148   | 0         | um05148   | 2c00032 | 0         |
| NNN | 2c00015 | um05112   | 0         |           |         |           |
| BBH | 2d00058 | um11568   | 0         | um11568   | 2d00058 | 0         |
| BBH | 2d00065 | um05219   | 0         | um05219   | 2d00065 | 0         |
| BBH | 2d00044 | um05178   | 1.00E-67  | um05178   | 2d00044 | 9.00E-54  |
| BBH | 2c00008 | um10172   | 0         | um10172   | 2c00008 | 0         |
| BBH | 2d00039 | um10189   | 0         | um10189   | 2d00039 | 0         |
| BBH | 2d00018 | um10175   | 0         | um10175   | 2d00018 | 0         |
| BBH | 2d00027 | um10180   | 1.00E-44  | um10180   | 2d00027 | 3.00E-41  |
| BBH | 2d00064 | um05215   | 2.00E-71  | um05215   | 2d00064 | 4.00E-74  |
| BBH | 2c00061 | um11569   | 1.00E-167 | um11569   | 2c00061 | 1.00E-170 |
| BBH | 2d00014 | um05116.2 | 1.00E-121 | um05116.2 | 2d00014 | 1.00E-124 |
| BBH | 2c00085 | um05241   | 0         | um05241   | 2c00085 | 0         |
| BBH | 2d00063 | um05214   | 0         | um05214   | 2d00063 | 0         |
| BBH | 2d00038 | um05163   | 1.00E-86  | um05163   | 2d00038 | 1.00E-85  |

|     |         |           |           |           |          |           |
|-----|---------|-----------|-----------|-----------|----------|-----------|
| BBH | 2c00001 | um05085   | 1.00E-105 | um05085   | 2c00001  | 1.00E-99  |
| NNN | 2d00049 | um10197   | 1.00E-71  |           |          |           |
| BBH | 2c00039 | um05162   | 0         | um05162   | 2c00039  | 0         |
| BBH | 2c00014 | um05111   | 1.00E-109 | um05111   | 2c00014  | 1.00E-114 |
| BBH | 2c00034 | um05152   | 0         | um05152   | 2c00034  | 0         |
| BBH | 2d00021 | um05130   | 0         | um05130   | 2d00021  | 0         |
| BBH | 2c00081 | um11785   | 0         | um11785   | 2c00081  | 0         |
| BBH | 2d00043 | um10191   | 1.00E-147 | um10191   | 2d00043  | 1.00E-152 |
| BBH | 2c00047 | um05174   | 1.00E-158 | um05174   | 2c00047  | 1.00E-173 |
| BBH | 2d00032 | um05149   | 1.00E-116 | um05149   | 2d00032  | 1.00E-122 |
| BBH | 2d00028 | um05142   | 0         | um05142   | 2d00028  | 0         |
| BBH | 2c00068 | um05216   | 1.00E-161 | um05216   | 2c00068  | 1.00E-175 |
| NNN | 2c00007 | um01656   | 3.00E-29  | um01656   | 22c00121 | 0         |
| BBH | 2c00048 | um05177   | 0         | um05177   | 2c00048  | 0         |
| BBH | 2d00037 | um05161   | 1.00E-78  | um05161   | 2d00037  | 2.00E-89  |
| BBH | 2d00062 | um11570   | 1.00E-99  | um11570   | 2d00062  | 2.00E-97  |
| BBH | 2c00076 | um05229   | 0         | um05229   | 2c00076  | 0         |
| BBH | 2d00015 | um05118   | 1.00E-154 | um05118   | 2d00015  | 0         |
| BBH | 2d00005 | um05091.2 | 1.00E-105 | um05091.2 | 2d00005  | 1.00E-115 |
| BBH | 2c00080 | um11783   | 3.00E-59  | um11783   | 2c00080  | 2.00E-63  |
| BBH | 2c00033 | um10184   | 0         | um10184   | 2c00033  | 0         |
| BBH | 2d00070 | um05228   | 2.00E-34  | um05228   | 2d00070  | 9.00E-31  |
| NNN | 2d00040 | um05167   | 5.00E-37  |           |          |           |
| NNN | 2c00006 | um01656   | 6.00E-53  | um01656   | 22c00121 | 0         |
| BBH | 2d00025 | um05138   | 1.00E-74  | um05138   | 2d00025  | 2.00E-73  |
| BBH | 2d00031 | um05145   | 1.00E-107 | um05145   | 2d00031  | 1.00E-115 |
| BBH | 2c00013 | um05109   | 1.00E-127 | um05109   | 2c00013  | 1.00E-127 |
| BBH | 2c00040 | um10188   | 0         | um10188   | 2c00040  | 0         |
| BBH | 2c00077 | um05231   | 3.00E-79  | um05231   | 2c00077  | 5.00E-78  |
| BBH | 2d00071 | um05230   | 0         | um05230   | 2d00071  | 0         |
| BBH | 2c00036 | um10187   | 3.00E-46  | um10187   | 2c00036  | 3.00E-35  |
| BBH | 2d00023 | um05134   | 0         | um05134   | 2d00023  | 0         |
| BBH | 2c00069 | um05217   | 1.00E-108 | um05217   | 2c00069  | 1.00E-117 |
| BBH | 2d00041 | um12158   | 1.00E-28  | um12158   | 2d00041  | 1.00E-26  |
| BBH | 2c00051 | um05183   | 5.00E-68  | um05183   | 2c00051  | 1.00E-66  |
| BBH | 2c00041 | um05169   | 0         | um05169   | 2c00041  | 0         |
| BBH | 2d00012 | um05110   | 0         | um05110   | 2d00012  | 0         |
| BBH | 2c00070 | um05218   | 0         | um05218   | 2c00070  | 0         |
| BBH | 2d00026 | um05139   | 1.00E-123 | um05139   | 2d00026  | 1.00E-123 |
| BBH | 2d00067 | um05224   | 0         | um05224   | 2d00067  | 0         |
| BBH | 2d00066 | um11572   | 1.00E-77  | um11572   | 2d00066  | 7.00E-93  |
| BBH | 2c00029 | um05141   | 0         | um05141   | 2c00029  | 0         |
| BBH | 2c00005 | um12157   | 3.00E-48  | um12157   | 2c00005  | 4.00E-55  |
| BBH | 2c00009 | um05100   | 2.00E-53  | um05100   | 2c00009  | 8.00E-52  |
| NNN | 2d00052 | um15018   | 1.00E-57  |           |          |           |
| BBH | 2c00063 | um05207   | 3.00E-39  | um05207   | 2c00063  | 8.00E-37  |
| NNN | 2c00019 | um10174   | 6.00E-22  | um10174   | 2d00016  | 0         |
| BBH | 2c00022 | um10177   | 0         | um10177   | 2c00022  | 0         |
| BBH | 2d00042 | um12159   | 0         | um12159   | 2d00042  | 0         |
| BBH | 2d00059 | um05206   | 0         | um05206   | 2d00059  | 0         |
| BBH | 2c00050 | um05180   | 1.00E-139 | um05180   | 2c00050  | 1.00E-137 |
| BBH | 2c00042 | um10190.2 | 0         | um10190.2 | 2c00042  | 0         |
| BBH | 2c00059 | um05200   | 0         | um05200   | 2c00059  | 0         |
| BBH | 2d00022 | um05131   | 0         | um05131   | 2d00022  | 0         |
| BBH | 2c00035 | um10186   | 9.00E-57  | um10186   | 2c00035  | 4.00E-59  |
| BBH | 2c00071 | um11571   | 9.00E-69  | um11571   | 2c00071  | 9.00E-68  |
| BBH | 2d00030 | um10181   | 0         | um10181   | 2d00030  | 0         |
| BBH | 2d00036 | um05159   | 3.00E-58  | um05159   | 2d00036  | 3.00E-56  |
| BBH | 2c00012 | um05107   | 0         | um05107   | 2c00012  | 0         |
| BBH | 2c00082 | um11786   | 9.00E-97  | um11786   | 2c00082  | 3.00E-91  |
| BBH | 2c00078 | um05232   | 0         | um05232   | 2c00078  | 0         |
| BBH | 2d00003 | um05087   | 2.00E-88  | um05087   | 2d00003  | 2.00E-94  |

|     |         |           |           |           |         |           |
|-----|---------|-----------|-----------|-----------|---------|-----------|
| BBH | 2d00013 | um05113.2 | 0         | um05113.2 | 2d00013 | 0         |
| BBH | 3d00089 | um10715   | 1.00E-145 | um10715   | 3d00089 | 1.00E-149 |
| BBH | 3c00041 | um11558   | 1.00E-113 | um11558   | 3c00041 | 1.00E-140 |
| BBH | 3c00065 | um12295   | 2.00E-75  | um12295   | 3c00065 | 4.00E-71  |
| BBH | 3c00076 | um05054   | 1.00E-120 | um05054   | 3c00076 | 1.00E-117 |
| BBH | 3d00041 | um11553   | 0         | um11553   | 3d00041 | 0         |
| BBH | 3d00024 | um11163.2 | 0         | um11163.2 | 3d00024 | 0         |
| BBH | 3c00021 | um12291   | 2.00E-87  | um12291   | 3c00021 | 2.00E-76  |
| BBH | 3c00049 | um04994   | 0         | um04994   | 3c00049 | 0         |
| BBH | 3d00046 | um04966   | 0         | um04966   | 3d00046 | 0         |
| BBH | 3d00019 | um04923   | 0         | um04923   | 3d00019 | 0         |
| BBH | 3c00003 | um04914   | 1.00E-157 | um04914   | 3c00003 | 1.00E-163 |
| BBH | 3d00015 | um04898   | 1.00E-158 | um04898   | 3d00015 | 1.00E-167 |
| BBH | 3c00062 | um05034   | 0         | um05034   | 3c00062 | 0         |
| BBH | 3d00009 | um11157   | 1.00E-90  | um11157   | 3d00009 | 3.00E-91  |
| BBH | 3d00034 | um04943   | 1.00E-47  | um04943   | 3d00034 | 2.00E-41  |
| BBH | 3c00001 | um04916   | 1.00E-142 | um04916   | 3c00001 | 1.00E-137 |
| BBH | 3d00078 | um05031   | 1.00E-105 | um05031   | 3d00078 | 1.00E-105 |
| BBH | 3d00095 | um05059   | 0         | um05059   | 3d00095 | 0         |
| BBH | 3d00002 | um04922   | 1.00E-119 | um04922   | 3d00002 | 1.00E-119 |
| BBH | 3d00051 | um11556   | 1.00E-137 | um11556   | 3d00051 | 1.00E-146 |
| BBH | 3c00059 | um05014   | 0         | um05014   | 3c00059 | 0         |
| BBH | 3c00071 | um10711   | 1.00E-120 | um10711   | 3c00071 | 1.00E-120 |
| BBH | 3d00064 | um12294   | 1.00E-101 | um12294   | 3d00064 | 5.00E-97  |
| BBH | 3c00048 | um04992.2 | 1.00E-50  | um04992.2 | 3c00048 | 4.00E-47  |
| BBH | 3d00070 | um05017.2 | 1.00E-171 | um05017.2 | 3d00070 | 1.00E-166 |
| BBH | 3d00088 | um10714   | 3.00E-55  | um10714   | 3d00088 | 5.00E-62  |
| BBH | 3c00004 | um04912   | 5.00E-48  | um04912   | 3c00004 | 6.00E-44  |
| BBH | 3c00040 | um04977   | 1.00E-170 | um04977   | 3c00040 | 1.00E-160 |
| BBH | 3d00014 | um04899   | 0         | um04899   | 3d00014 | 0         |
| BBH | 3c00066 | um10709   | 0         | um10709   | 3c00066 | 0         |
| BBH | 3c00022 | um04939   | 1.00E-177 | um04939   | 3c00022 | 1.00E-177 |
| BBH | 3c00033 | um04962   | 1.00E-100 | um04962   | 3c00033 | 1.00E-101 |
| BBH | 3c00014 | um04928   | 0         | um04928   | 3c00014 | 0         |
| BBH | 3d00003 | um11161   | 1.00E-117 | um11161   | 3d00003 | 1.00E-117 |
| BBH | 3d00094 | um05058   | 3.00E-61  | um05058   | 3d00094 | 3.00E-61  |
| BBH | 3c00070 | um05038   | 0         | um05038   | 3c00070 | 0         |
| BBH | 3d00050 | um04971   | 0         | um04971   | 3d00050 | 0         |
| BBH | 3d00007 | um04909   | 1.00E-153 | um04909   | 3d00007 | 1.00E-164 |
| BBH | 3c00058 | um05013   | 0         | um05013   | 3c00058 | 0         |
| BBH | 3d00045 | um04965   | 9.00E-42  | um04965   | 3d00045 | 8.00E-36  |
| BBH | 3d00057 | um12013   | 0         | um12013   | 3d00057 | 0         |
| BBH | 3c00034 | um04964   | 0         | um04964   | 3c00034 | 0         |
| BBH | 3d00079 | um05028   | 0         | um05028   | 3d00079 | 0         |
| BBH | 3c00051 | um04999   | 1.00E-159 | um04999   | 3c00051 | 1.00E-147 |
| BBH | 3c00038 | um04972   | 1.00E-119 | um04972   | 3c00038 | 1.00E-119 |
| BBH | 3d00036 | um04947   | 0         | um04947   | 3d00036 | 0         |
| BBH | 3c00009 | um04902   | 1.00E-153 | um04902   | 3c00009 | 1.00E-152 |
| BBH | 3d00063 | um04998   | 1.00E-170 | um04998   | 3d00063 | 1.00E-117 |
| BBH | 3d00077 | um05025   | 0         | um05025   | 3d00077 | 0         |
| BBH | 3d00043 | um04960   | 8.00E-66  | um04960   | 3d00043 | 1.00E-63  |
| BBH | 3c00043 | um12012   | 3.00E-72  | um12012   | 3c00043 | 1.00E-73  |
| NNN | 3c00010 | um04902   | 1.00E-34  | um04902   | 3c00009 | 1.00E-152 |
| BBH | 3c00023 | um04942   | 1.00E-103 | um04942   | 3c00023 | 1.00E-117 |
| BBH | 3c00050 | um11559   | 0         | um11559   | 3c00050 | 0         |
| BBH | 3c00042 | um04979   | 0         | um04979   | 3c00042 | 0         |
| BBH | 3d00097 | um05062   | 3.00E-70  | um05062   | 3d00097 | 1.00E-70  |
| BBH | 3d00042 | um04956   | 0         | um04956   | 3d00042 | 0         |
| BBH | 3c00067 | um05026   | 8.00E-19  | um05026   | 3c00067 | 1.00E-19  |
| BBH | 3d00056 | um04985   | 4.00E-95  | um04985   | 3d00056 | 3.00E-99  |
| BBH | 3c00053 | um12293   | 1.00E-73  | um12293   | 3c00053 | 3.00E-73  |
| BBH | 3d00029 | um04934   | 1.00E-172 | um04934   | 3d00029 | 1.00E-168 |

|     |         |           |           |           |         |           |
|-----|---------|-----------|-----------|-----------|---------|-----------|
| BBH | 3c00029 | um04954.2 | 5.00E-13  | um04954.2 | 3c00029 | 5.00E-11  |
| BBH | 3d00031 | um11769   | 1.00E-124 | um11769   | 3d00031 | 1.00E-123 |
| BBH | 3d00096 | um05060   | 5.00E-35  | um05060   | 3d00096 | 5.00E-34  |
| BBH | 3c00024 | um04944   | 0         | um04944   | 3c00024 | 0         |
| BBH | 3d00013 | um04900   | 0         | um04900   | 3d00013 | 0         |
| BBH | 3d00062 | um04997   | 0         | um04997   | 3d00062 | 0         |
| BBH | 3d00047 | um04967   | 1.00E-177 | um04967   | 3d00047 | 1.00E-177 |
| BBH | 3d00055 | um04980   | 6.00E-60  | um04980   | 3d00055 | 2.00E-96  |
| BBH | 3d00025 | um04931   | 0         | um04931   | 3d00025 | 0         |
| BBH | 3d00028 | um12011   | 1.00E-21  | um12011   | 3d00028 | 4.00E-25  |
| BBH | 3c00012 | um04897   | 1.00E-179 | um04897   | 3c00012 | 1.00E-179 |
| BBH | 3c00037 | um04970   | 0         | um04970   | 3c00037 | 0         |
| BBH | 3d00008 | um04906   | 0         | um04906   | 3d00008 | 0         |
| BBH | 3c00002 | um04915   | 1.00E-132 | um04915   | 3c00002 | 1.00E-132 |
| BBH | 3d00083 | um05039   | 0         | um05039   | 3d00083 | 0         |
| NNN | 3d00023 | um04930   | 0         |           |         |           |
| BBH | 3c00031 | um04959   | 0         | um04959   | 3c00031 | 0         |
| BBH | 3c00075 | um05052   | 0         | um05052   | 3c00075 | 0         |
| BBH | 3d00030 | um11768   | 1.00E-19  | um11768   | 3d00030 | 3.00E-26  |
| BBH | 3d00091 | um05055   | 6.00E-39  | um05055   | 3d00091 | 2.00E-36  |
| BBH | 3d00061 | um04995   | 5.00E-44  | um04995   | 3d00061 | 1.00E-45  |
| NNN | 3d00049 | um01996   | 8.00E-78  |           |         |           |
| NNN | 3c00080 | um02742   | 1.00E-101 | um02742   | 5c00029 | 0         |
| BBH | 3c00068 | um05030   | 1.00E-159 | um05030   | 3c00068 | 1.00E-159 |
| BBH | 3c00026 | um04950   | 0         | um04950   | 3c00026 | 0         |
| BBH | 3d00073 | um05033   | 0         | um05033   | 3d00073 | 0         |
| BBH | 3c00074 | um05050   | 0         | um05050   | 3c00074 | 0         |
| BBH | 3c00011 | um04901   | 0         | um04901   | 3c00011 | 0         |
| BBH | 3d00022 | um04927   | 2.00E-57  | um04927   | 3d00022 | 9.00E-55  |
| BBH | 3c00055 | um05005   | 2.00E-45  | um05005   | 3c00055 | 2.00E-45  |
| BBH | 3c00061 | um05018   | 1.00E-159 | um05018   | 3c00061 | 1.00E-153 |
| BBH | 3d00085 | um05045   | 0         | um05045   | 3d00085 | 0         |
| BBH | 3c00039 | um04975   | 0         | um04975   | 3c00039 | 0         |
| BBH | 3d00076 | um05023   | 0         | um05023   | 3d00076 | 0         |
| BBH | 3d00087 | um10713.2 | 2.00E-90  | um10713.2 | 3d00087 | 1.00E-89  |
| BBH | 3c00045 | um04983   | 0         | um04983   | 3c00045 | 0         |
| BBH | 3c00018 | um15100   | 1.00E-74  | um15100   | 3c00018 | 9.00E-64  |
| BBH | 3d00037 | um04948   | 2.00E-43  | um04948   | 3d00037 | 2.00E-43  |
| BBH | 3d00033 | um11770   | 4.00E-95  | um11770   | 3d00033 | 4.00E-95  |
| BBH | 3c00079 | um12068   | 2.00E-98  | um12068   | 3c00079 | 8.00E-99  |
| BBH | 3d00090 | um05053   | 2.00E-81  | um05053   | 3d00090 | 2.00E-81  |
| BBH | 3d00054 | um11557   | 1.00E-85  | um11557   | 3d00054 | 2.00E-84  |
| BBH | 3d00075 | um05022   | 0         | um05022   | 3d00075 | 0         |
| BBH | 3c00030 | um11554   | 0         | um11554   | 3c00030 | 0         |
| BBH | 3d00068 | um11563   | 2.00E-75  | um11563   | 3d00068 | 2.00E-80  |
| NNN | 3d00102 | um02062   | 2.00E-40  | um02062   | 6c00122 | 0         |
| BBH | 3d00060 | um04993   | 1.00E-77  | um04993   | 3d00060 | 6.00E-87  |
| BBH | 3d00048 | um04969   | 1.00E-111 | um04969   | 3d00048 | 1.00E-120 |
| BBH | 3d00067 | um11562   | 5.00E-22  | um11562   | 3d00067 | 3.00E-21  |
| BBH | 3c00073 | um12297   | 3.00E-70  | um12297   | 3c00073 | 1.00E-65  |
| BBH | 3c00007 | um04905   | 0         | um04905   | 3c00007 | 0         |
| BBH | 3d00010 | um12289   | 1.00E-114 | um12289   | 3d00010 | 1.00E-114 |
| NNN | 3d00059 | um04991   | 0         |           |         |           |
| BBH | 3c00044 | um04982   | 1.00E-174 | um04982   | 3c00044 | 0         |
| BBH | 3c00069 | um05036   | 1.00E-121 | um05036   | 3c00069 | 1.00E-126 |
| BBH | 3d00084 | um10712   | 1.00E-117 | um10712   | 3d00084 | 1.00E-114 |
| BBH | 3c00017 | um04932   | 8.00E-78  | um04932   | 3c00017 | 3.00E-80  |
| BBH | 3c00032 | um04961   | 0         | um04961   | 3c00032 | 0         |
| BBH | 3d00004 | um04913   | 1.00E-118 | um04913   | 3d00004 | 1.00E-120 |
| BBH | 3d00039 | um04951   | 0         | um04951   | 3d00039 | 0         |
| NNN | 3c00028 | um11552   | 3.00E-87  |           |         |           |
| BBH | 3c00054 | um05004   | 1.00E-134 | um05004   | 3c00054 | 1.00E-107 |

|     |         |           |           |           |          |           |
|-----|---------|-----------|-----------|-----------|----------|-----------|
| BBH | 3c00057 | um11564   | 6.00E-39  | um11564   | 3c00057  | 8.00E-21  |
| BBH | 3d00044 | um04963   | 3.00E-73  | um04963   | 3d00044  | 5.00E-73  |
| BBH | 3d00093 | um05057   | 0         | um05057   | 3d00093  | 0         |
| BBH | 3d00071 | um05019   | 0         | um05019   | 3d00071  | 0         |
| BBH | 3d00053 | um04976   | 0         | um04976   | 3d00053  | 0         |
| NNN | 3d00081 | um05040   | 7.00E-37  | um05040   | 3d00082  | 1.00E-57  |
| BBH | 3d00021 | um04926   | 0         | um04926   | 3d00021  | 0         |
| BBH | 3c00078 | um05061   | 0         | um05061   | 3c00078  | 0         |
| BBH | 3d00069 | um05015   | 3.00E-28  | um05015   | 3d00069  | 6.00E-20  |
| BBH | 3c00047 | um04989   | 2.00E-89  | um04989   | 3c00047  | 1.00E-100 |
| NNN | 3d00032 | um11769   | 1.00E-100 | um11769   | 3d00031  | 1.00E-123 |
| BBH | 3c00005 | um04908   | 2.00E-56  | um04908   | 3c00005  | 4.00E-65  |
| NNN | 3c00008 | um02490   | 1.00E-112 | um02490   | 12c00135 | 0         |
| BBH | 3d00082 | um05040   | 9.00E-58  | um05040   | 3d00082  | 1.00E-57  |
| NNN | 3c00060 | um10707   | 2.00E-18  |           |          |           |
| BBH | 3d00099 | um05064   | 0         | um05064   | 3d00099  | 0         |
| BBH | 3d00066 | um11561   | 1.00E-51  | um11561   | 3d00066  | 9.00E-52  |
| BBH | 3d00017 | um04896   | 0         | um04896   | 3d00017  | 0         |
| BBH | 3d00026 | um12009   | 2.00E-49  | um12009   | 3d00026  | 8.00E-47  |
| BBH | 3d00100 | um05065   | 0         | um05065   | 3d00100  | 0         |
| BBH | 3d00005 | um04910   | 0         | um04910   | 3d00005  | 0         |
| BBH | 3d00038 | um12292   | 2.00E-36  | um12292   | 3d00038  | 2.00E-41  |
| BBH | 3c00064 | um05035   | 0         | um05035   | 3c00064  | 0         |
| BBH | 3d00001 | um04920   | 0         | um04920   | 3d00001  | 0         |
| BBH | 3c00056 | um05007   | 0         | um05007   | 3c00056  | 0         |
| BBH | 3d00092 | um12298   | 0         | um12298   | 3d00092  | 0         |
| BBH | 3c00072 | um05044   | 1.00E-89  | um05044   | 3c00072  | 8.00E-81  |
| BBH | 3d00052 | um04974   | 8.00E-27  | um04974   | 3d00052  | 4.00E-27  |
| BBH | 3d00020 | um04925   | 1.00E-138 | um04925   | 3d00020  | 1.00E-136 |
| BBH | 3c00016 | um12008   | 0         | um12008   | 3c00016  | 0         |
| BBH | 3c00063 | um05037   | 1.00E-141 | um05037   | 3c00063  | 1.00E-141 |
| BBH | 3d00080 | um05042.2 | 1.00E-114 | um05042.2 | 3d00080  | 1.00E-130 |
| BBH | 3c00006 | um04907   | 0         | um04907   | 3c00006  | 0         |
| BBH | 3d00074 | um10708   | 1.00E-127 | um10708   | 3d00074  | 1.00E-122 |
| BBH | 3c00025 | um11771   | 3.00E-67  | um11771   | 3c00025  | 2.00E-66  |
| BBH | 3c00046 | um04988   | 1.00E-146 | um04988   | 3c00046  | 1.00E-146 |
| BBH | 3c00020 | um04936   | 1.00E-101 | um04936   | 3c00020  | 2.00E-99  |
| BBH | 3d00016 | um04324   | 0         | um04324   | 3d00016  | 0         |
| BBH | 3d00072 | um05032   | 0         | um05032   | 3d00072  | 0         |
| BBH | 3c00019 | um11767   | 1.00E-145 | um11767   | 3c00019  | 1.00E-152 |
| BBH | 3d00098 | um05063   | 0         | um05063   | 3d00098  | 0         |
| BBH | 3d00065 | um11560   | 0         | um11560   | 3d00065  | 0         |
| NNN | 3d00086 | um05046   | 6.00E-37  |           |          |           |
| BBH | 4d00042 | um06344   | 0         | um06344   | 4d00042  | 0         |
| BBH | 4d00005 | um06295   | 0         | um06295   | 4d00005  | 0         |
| BBH | 4d00027 | um06317   | 0         | um06317   | 4d00027  | 0         |
| BBH | 4c00009 | um10763   | 1.00E-158 | um10763   | 4c00009  | 1.00E-162 |
| BBH | 4c00008 | um10765   | 1.00E-59  | um10765   | 4c00008  | 4.00E-61  |
| NNN | 4c00006 | um06292   | 4.00E-48  | um06292   | 4c00007  | 8.00E-91  |
| BBH | 4d00035 | um10785   | 1.00E-120 | um10785   | 4d00035  | 1.00E-126 |
| BBH | 4c00041 | um06346   | 8.00E-60  | um06346   | 4c00041  | 9.00E-64  |
| BBH | 4d00015 | um12332   | 1.00E-43  | um12332   | 4d00015  | 7.00E-44  |
| BBH | 4c00024 | um12334   | 1.00E-22  | um12334   | 4c00024  | 3.00E-18  |
| BBH | 4d00032 | um06326   | 1.00E-111 | um06326   | 4d00032  | 1.00E-124 |
| BBH | 4d00006 | um06294   | 0         | um06294   | 4d00006  | 0         |
| BBH | 4d00024 | um10773   | 3.00E-81  | um10773   | 4d00024  | 5.00E-92  |
| BBH | 4d00045 | um05614   | 3.00E-78  | um05614   | 4d00045  | 3.00E-78  |
| BBH | 4c00025 | um10776   | 1.00E-172 | um10776   | 4c00025  | 1.00E-175 |
| BBH | 4d00014 | um06281   | 0         | um06281   | 4d00014  | 0         |
| BBH | 4c00019 | um10769   | 0         | um10769   | 4c00019  | 0         |
| BBH | 4c00040 | um15092   | 1.00E-167 | um15092   | 4c00040  | 1.00E-168 |
| BBH | 4d00033 | um10782   | 0         | um10782   | 4d00033  | 0         |

|     |         |           |           |           |          |           |
|-----|---------|-----------|-----------|-----------|----------|-----------|
| BBH | 4d00012 | um15029   | 1.00E-66  | um15029   | 4d00012  | 3.00E-69  |
| BBH | 4c00031 | um12335   | 8.00E-79  | um12335   | 4c00031  | 1.00E-86  |
| BBH | 4c00022 | um10775   | 0         | um10775   | 4c00022  | 0         |
| BBH | 4c00038 | um06338   | 0         | um06338   | 4c00038  | 0         |
| BBH | 4c00030 | um10781   | 1.00E-120 | um10781   | 4c00030  | 1.00E-128 |
| BBH | 4d00019 | um10761   | 0         | um10761   | 4d00019  | 0         |
| BBH | 4d00010 | um06273   | 0         | um06273   | 4d00010  | 0         |
| BBH | 4c00028 | um10780   | 5.00E-63  | um10780   | 4c00028  | 5.00E-61  |
| BBH | 4d00025 | um06312   | 8.00E-50  | um06312   | 4d00025  | 3.00E-46  |
| NNN | 4d00003 | um10772   | 3.00E-23  |           |          |           |
| BBH | 4d00044 | um06347   | 0         | um06347   | 4d00044  | 0         |
| BBH | 4d00030 | um10779   | 0         | um10779   | 4d00030  | 0         |
| BBH | 4d00011 | um06274   | 0         | um06274   | 4d00011  | 0         |
| BBH | 4c00032 | um06329   | 1.00E-118 | um06329   | 4c00032  | 1.00E-114 |
| BBH | 4d00013 | um06280   | 0         | um06280   | 4d00013  | 0         |
| BBH | 4d00022 | um06305   | 2.00E-70  | um06305   | 4d00022  | 3.00E-84  |
| BBH | 4c00039 | um12042   | 0         | um12042   | 4c00039  | 0         |
| BBH | 4c00023 | um06316   | 0         | um06316   | 4c00023  | 0         |
| BBH | 4c00010 | um06288   | 0         | um06288   | 4c00010  | 0         |
| BBH | 4d00004 | um10770   | 1.00E-139 | um10770   | 4d00004  | 1.00E-147 |
| BBH | 4c00029 | um06323   | 2.00E-50  | um06323   | 4c00029  | 3.00E-50  |
| BBH | 4c00012 | um15067   | 8.00E-29  | um15067   | 4c00012  | 1.00E-25  |
| BBH | 4d00038 | um06333   | 0         | um06333   | 4d00038  | 0         |
| BBH | 4c00037 | um06337   | 0         | um06337   | 4c00037  | 0         |
| BBH | 4d00031 | um06324   | 2.00E-90  | um06324   | 4d00031  | 2.00E-90  |
| BBH | 4c00033 | um10784   | 1.00E-172 | um10784   | 4c00033  | 1.00E-172 |
| BBH | 4d00020 | um06268   | 0         | um06268   | 4d00020  | 0         |
| BBH | 4c00016 | um06270   | 1.00E-177 | um06270   | 4c00016  | 1.00E-161 |
| BBH | 4c00020 | um06304.2 | 1.00E-144 | um06304.2 | 4c00020  | 1.00E-147 |
| BBH | 4d00017 | um06269   | 0         | um06269   | 4d00017  | 0         |
| BBH | 4c00002 | um06296   | 0         | um06296   | 4c00002  | 0         |
| BBH | 4d00023 | um06306   | 0         | um06306   | 4d00023  | 0         |
| BBH | 4c00011 | um06276   | 2.00E-36  | um06276   | 4c00011  | 3.00E-35  |
| NNN | 4c00043 | um12236   | 2.00E-13  | um12236   | 8d00015  | 1.00E-138 |
| BBH | 4d00039 | um06335   | 0         | um06335   | 4d00039  | 0         |
| BBH | 4d00021 | um10768   | 0         | um10768   | 4d00021  | 1.00E-178 |
| BBH | 4c00015 | um10760   | 9.00E-92  | um10760   | 4c00015  | 8.00E-92  |
| BBH | 4d00018 | um06271   | 1.00E-73  | um06271   | 4d00018  | 2.00E-64  |
| NNN | 4d00036 | um03801   | 9.00E-44  | um03801   | 27c00064 | 2.00E-54  |
| BBH | 4d00002 | um06299   | 0         | um06299   | 4d00002  | 0         |
| BBH | 4d00041 | um06341   | 0         | um06341   | 4d00041  | 0         |
| BBH | 4d00029 | um10777   | 0         | um10777   | 4d00029  | 0         |
| BBH | 4c00035 | um06334   | 0         | um06334   | 4c00035  | 0         |
| BBH | 4c00042 | um06348   | 0         | um06348   | 4c00042  | 0         |
| BBH | 4c00014 | um06284   | 0         | um06284   | 4c00014  | 0         |
| BBH | 4c00018 | um12039   | 3.00E-77  | um12039   | 4c00018  | 2.00E-80  |
| BBH | 4c00003 | um06298   | 1.00E-124 | um06298   | 4c00003  | 1.00E-117 |
| BBH | 4d00007 | um06290   | 1.00E-61  | um06290   | 4d00007  | 2.00E-62  |
| BBH | 4d00008 | um10764   | 4.00E-33  | um10764   | 4d00008  | 6.00E-39  |
| BBH | 4c00026 | um10778   | 0         | um10778   | 4c00026  | 0         |
| BBH | 4d00001 | um10767   | 0         | um10767   | 4d00001  | 0         |
| BBH | 4d00026 | um06314   | 0         | um06314   | 4d00026  | 0         |
| BBH | 4c00036 | um06336   | 1.00E-152 | um06336   | 4c00036  | 1.00E-154 |
| BBH | 4c00013 | um06278   | 3.00E-70  | um06278   | 4c00013  | 1.00E-136 |
| BBH | 4c00004 | um10771   | 4.00E-71  | um10771   | 4c00004  | 4.00E-74  |
| BBH | 4d00037 | um06332   | 4.00E-96  | um06332   | 4d00037  | 1.00E-102 |
| BBH | 4d00016 | um06285   | 0         | um06285   | 4d00016  | 0         |
| BBH | 4c00007 | um06292   | 3.00E-90  | um06292   | 4c00007  | 8.00E-91  |
| BBH | 4d00009 | um06287   | 0         | um06287   | 4d00009  | 0         |
| BBH | 4d00043 | um06345   | 0         | um06345   | 4d00043  | 0         |
| BBH | 4d00034 | um10783   | 4.00E-79  | um10783   | 4d00034  | 2.00E-80  |
| BBH | 4d00040 | um12041   | 0         | um12041   | 4d00040  | 0         |



|     |         |           |           |           |          |           |
|-----|---------|-----------|-----------|-----------|----------|-----------|
| BBH | 5d00070 | um02667   | 0         | um02667   | 5d00070  | 0         |
| BBH | 5d00084 | um02641   | 1.00E-129 | um02641   | 5d00084  | 1.00E-150 |
| BBH | 5d00067 | um10308   | 0         | um10308   | 5d00067  | 0         |
| BBH | 5c00025 | um02755   | 0         | um02755   | 5c00025  | 0         |
| BBH | 5c00164 | um02508   | 0         | um02508   | 5c00164  | 0         |
| BBH | 5c00027 | um15091   | 6.00E-94  | um15091   | 5c00027  | 1.00E-110 |
| BBH | 5d00039 | um11720   | 0         | um11720   | 5d00039  | 0         |
| BBH | 5d00061 | um10315   | 2.00E-18  | um10315   | 5d00061  | 1.00E-19  |
| BBH | 5c00062 | um11922   | 0         | um11922   | 5c00062  | 0         |
| BBH | 5d00092 | um02628   | 0         | um02628   | 5d00092  | 0         |
| BBH | 5c00097 | um10294   | 0         | um10294   | 5c00097  | 0         |
| BBH | 5d00141 | um11413   | 1.00E-18  | um11413   | 5d00141  | 2.00E-19  |
| BBH | 5c00003 | um02810   | 0         | um02810   | 5c00003  | 0         |
| BBH | 5c00008 | um02796   | 0         | um02796   | 5c00008  | 0         |
| BBH | 5c00125 | um02574   | 1.00E-180 | um02574   | 5c00125  | 1.00E-180 |
| BBH | 5d00052 | um11927   | 4.00E-80  | um11927   | 5d00052  | 2.00E-80  |
| BBH | 5c00101 | um10285   | 0         | um10285   | 5c00101  | 0         |
| BBH | 5c00083 | um02651   | 1.00E-170 | um02651   | 5c00083  | 1.00E-174 |
| BBH | 5d00130 | um02552   | 0         | um02552   | 5d00130  | 0         |
| BBH | 5c00138 | um02546   | 1.00E-109 | um02546   | 5c00138  | 1.00E-121 |
| BBH | 5d00051 | um11925   | 2.00E-51  | um11925   | 5d00051  | 3.00E-51  |
| BBH | 5c00076 | um02665   | 8.00E-41  | um02665   | 5c00076  | 6.00E-40  |
| BBH | 5c00071 | um10307   | 1.00E-150 | um10307   | 5c00071  | 1.00E-148 |
| BBH | 5c00052 | um11926   | 0         | um11926   | 5c00052  | 0         |
| BBH | 5c00118 | um02584   | 4.00E-62  | um02584   | 5c00118  | 4.00E-62  |
| BBH | 5d00108 | um02596   | 5.00E-50  | um02596   | 5d00108  | 5.00E-51  |
| BBH | 5d00112 | um10279   | 0         | um10279   | 5d00112  | 0         |
| BBH | 5d00003 | um02799   | 0         | um02799   | 5d00003  | 0         |
| BBH | 5d00096 | um10293.2 | 0         | um10293.2 | 5d00096  | 0         |
| BBH | 5c00150 | um02527   | 0         | um02527   | 5c00150  | 0         |
| BBH | 5c00111 | um02599   | 1.00E-179 | um02599   | 5c00111  | 0         |
| BBH | 5d00019 | um02760   | 0         | um02760   | 5d00019  | 0         |
| BBH | 5c00044 | um02717   | 2.00E-85  | um02717   | 5c00044  | 1.00E-101 |
| BBH | 5d00006 | um10604   | 0         | um10604   | 5d00006  | 0         |
| BBH | 5d00118 | um02575   | 1.00E-161 | um02575   | 5d00118  | 1.00E-161 |
| BBH | 5d00042 | um02712   | 3.00E-27  | um02712   | 5d00042  | 3.00E-30  |
| BBH | 5c00090 | um10295   | 0         | um10295   | 5c00090  | 0         |
| BBH | 5c00059 | um11928   | 1.00E-144 | um11928   | 5c00059  | 1.00E-145 |
| BBH | 5d00077 | um02653   | 0         | um02653   | 5d00077  | 0         |
| NNN | 5c00144 | um02535   | 1.00E-14  | um02535   | 5c00145  | 1.00E-14  |
| BBH | 5c00032 | um11727.2 | 1.00E-138 | um11727.2 | 5c00032  | 1.00E-129 |
| BBH | 5d00109 | um02594.2 | 1.00E-164 | um02594.2 | 5d00109  | 1.00E-163 |
| NNN | 5d00069 | um02668   | 0         |           |          |           |
| BBH | 5d00105 | um02607   | 0         | um02607   | 5d00105  | 0         |
| BBH | 5c00120 | um02581   | 0         | um02581   | 5c00120  | 0         |
| BBH | 5d00091 | um02626   | 0         | um02626   | 5d00091  | 0         |
| BBH | 5d00126 | um02561   | 0         | um02561   | 5d00126  | 0         |
| BBH | 5c00163 | um11406   | 0         | um11406   | 5c00163  | 0         |
| NNN | 5c00096 | um02632   | 5.00E-69  |           |          |           |
| BBH | 5d00064 | um10311   | 7.00E-31  | um10311   | 5d00064  | 4.00E-32  |
| BBH | 5c00162 | um02510   | 7.00E-97  | um02510   | 5c00162  | 1.00E-122 |
| BBH | 5c00132 | um11715   | 0         | um11715   | 5c00132  | 0         |
| BBH | 5c00016 | um02774   | 1.00E-162 | um02774   | 5c00016  | 1.00E-161 |
| NNN | 5d00029 | um02736   | 1.00E-36  | um02736   | 5c00034  | 0         |
| BBH | 5c00034 | um02736   | 0         | um02736   | 5c00034  | 0         |
| NNN | 5c00102 | um02615   | 1.00E-165 |           |          |           |
| BBH | 5c00112 | um02597   | 0         | um02597   | 5c00112  | 0         |
| NNN | 5c00022 | um04481   | 2.00E-49  | um04481   | 11d00086 | 0         |
| NNN | 5d00071 | um02662   | 1.00E-86  | um02662   | 5d00072  | 0         |
| BBH | 5c00077 | um02664   | 0         | um02664   | 5c00077  | 0         |
| BBH | 5d00078 | um02652   | 2.00E-16  | um02652   | 5d00078  | 2.00E-26  |
| BBH | 5d00041 | um02711   | 0         | um02711   | 5d00041  | 0         |

|     |         |           |           |           |          |           |
|-----|---------|-----------|-----------|-----------|----------|-----------|
| BBH | 5c00148 | um02530   | 3.00E-91  | um02530   | 5c00148  | 8.00E-82  |
| BBH | 5d00099 | um10287   | 0         | um10287   | 5d00099  | 0         |
| BBH | 5d00100 | um10286   | 3.00E-56  | um10286   | 5d00100  | 1.00E-56  |
| BBH | 5c00058 | um02701.2 | 1.00E-114 | um02701.2 | 5c00058  | 1.00E-115 |
| BBH | 5d00136 | um02531   | 1.00E-152 | um02531   | 5d00136  | 1.00E-152 |
| BBH | 5d00004 | um02792   | 0         | um02792   | 5d00004  | 0         |
| NNN | 5c00143 | um02535   | 6.00E-16  | um02535   | 5c00145  | 1.00E-14  |
| BBH | 5d00115 | um02583   | 0         | um02583   | 5d00115  | 0         |
| BBH | 5c00115 | um02591   | 0         | um02591   | 5c00115  | 0         |
| BBH | 5c00082 | um02654   | 1.00E-142 | um02654   | 5c00082  | 1.00E-140 |
| BBH | 5d00110 | um02592   | 1.00E-174 | um02592   | 5d00110  | 1.00E-177 |
| NNN | 5d00059 | um10313   | 5.00E-38  | um10313   | 16c00076 | 2.00E-51  |
| BBH | 5c00098 | um02619   | 0         | um02619   | 5c00098  | 0         |
| NNN | 5c00157 | um11410   | 0         |           |          |           |
| BBH | 5c00073 | um02683   | 0         | um02683   | 5c00073  | 0         |
| BBH | 5c00005 | um02802   | 0         | um02802   | 5c00005  | 0         |
| BBH | 5d00079 | um02649   | 0         | um02649   | 5d00079  | 0         |
| BBH | 5c00029 | um02742   | 0         | um02742   | 5c00029  | 0         |
| BBH | 5c00091 | um02620   | 1.00E-95  | um02620   | 5c00091  | 5.00E-92  |
| BBH | 5c00153 | um02521   | 1.00E-177 | um02521   | 5c00153  | 1.00E-167 |
| BBH | 5c00064 | um15061.2 | 0         | um15061.2 | 5c00064  | 0         |
| BBH | 5c00011 | um02784   | 1.00E-165 | um02784   | 5c00011  | 0         |
| NNN | 5c00043 | um02719   | 1.00E-165 |           |          |           |
| BBH | 5d00085 | um02639   | 0         | um02639   | 5d00085  | 0         |
| BBH | 5d00037 | um02720.2 | 1.00E-165 | um02720.2 | 5d00037  | 1.00E-166 |
| BBH | 5d00090 | um02624   | 1.00E-178 | um02624   | 5d00090  | 1.00E-167 |
| NNN | 5c00114 | um10280   | 6.00E-31  |           |          |           |
| BBH | 5c00092 | um02622   | 1.00E-101 | um02622   | 5c00092  | 9.00E-89  |
| BBH | 5c00042 | um02725   | 0         | um02725   | 5c00042  | 0         |
| NNN | 5c00057 | um02700   | 7.00E-73  |           |          |           |
| BBH | 5c00113 | um02595   | 0         | um02595   | 5c00113  | 0         |
| BBH | 5d00001 | um11961   | 3.00E-21  | um11961   | 5d00001  | 3.00E-21  |
| BBH | 5d00125 | um02564   | 3.00E-69  | um02564   | 5d00125  | 3.00E-67  |
| BBH | 5d00047 | um02707   | 3.00E-57  | um02707   | 5d00047  | 2.00E-56  |
| BBH | 5d00114 | um02586   | 0         | um02586   | 5d00114  | 0         |
| BBH | 5c00149 | um02529   | 0         | um02529   | 5c00149  | 0         |
| BBH | 5d00089 | um02623   | 0         | um02623   | 5d00089  | 0         |
| BBH | 5d00106 | um02600   | 0         | um02600   | 5d00106  | 0         |
| BBH | 5d00098 | um02618.2 | 1.00E-165 | um02618.2 | 5d00098  | 1.00E-174 |
| BBH | 5d00143 | um11412   | 1.00E-34  | um11412   | 5d00143  | 1.00E-34  |
| BBH | 5c00123 | um02577   | 0         | um02577   | 5c00123  | 0         |
| BBH | 5c00145 | um02535   | 1.00E-14  | um02535   | 5c00145  | 1.00E-14  |
| BBH | 5d00058 | um02678   | 1.00E-104 | um02678   | 5d00058  | 1.00E-110 |
| NNN | 5d00122 | um02568   | 0         |           |          |           |
| BBH | 5d00072 | um02662   | 0         | um02662   | 5d00072  | 0         |
| BBH | 5c00079 | um10305   | 0         | um10305   | 5c00079  | 0         |
| BBH | 5c00131 | um02556   | 2.00E-76  | um02556   | 5c00131  | 3.00E-43  |
| BBH | 5d00020 | um02754   | 2.00E-94  | um02754   | 5d00020  | 2.00E-94  |
| BBH | 5d00137 | um02528   | 0         | um02528   | 5d00137  | 0         |
| BBH | 5c00050 | um11716   | 3.00E-40  | um11716   | 5c00050  | 3.00E-40  |
| BBH | 5d00012 | um02778   | 0         | um02778   | 5d00012  | 0         |
| BBH | 5c00010 | um10605   | 1.00E-167 | um10605   | 5c00010  | 1.00E-155 |
| NNN | 5c00037 | um02732   | 7.00E-24  |           |          |           |
| BBH | 5d00103 | um10284   | 0         | um10284   | 5d00103  | 0         |
| BBH | 5c00105 | um02610   | 1.00E-137 | um02610   | 5c00105  | 1.00E-129 |
| BBH | 5c00154 | um02519   | 0         | um02519   | 5c00154  | 0         |
| NNN | 5d00011 | um01868   | 1.00E-49  | um01868   | 22d00215 | 0         |
| BBH | 5c00019 | um02768   | 4.00E-34  | um02768   | 5c00019  | 4.00E-34  |
| BBH | 5c00147 | um11414   | 1.00E-105 | um11414   | 5c00147  | 1.00E-114 |
| BBH | 5d00057 | um02676   | 0         | um02676   | 5d00057  | 0         |
| NNN | 5d00068 | um02685   | 0         |           |          |           |
| BBH | 5d00017 | um02765   | 0         | um02765   | 5d00017  | 0         |

|     |         |           |           |           |          |           |
|-----|---------|-----------|-----------|-----------|----------|-----------|
| BBH | 5d00120 | um02571   | 0         | um02571   | 5d00120  | 0         |
| BBH | 5c00085 | um10302.2 | 2.00E-33  | um10302.2 | 5c00085  | 9.00E-51  |
| BBH | 5d00031 | um02733.2 | 0         | um02733.2 | 5d00031  | 0         |
| BBH | 5d00086 | um02638   | 0         | um02638   | 5d00086  | 0         |
| BBH | 5c00065 | um15096   | 1.00E-137 | um15096   | 5c00065  | 1.00E-135 |
| BBH | 5c00026 | um02750   | 1.00E-133 | um02750   | 5c00026  | 1.00E-142 |
| BBH | 5c00024 | um02757   | 1.00E-165 | um02757   | 5c00024  | 1.00E-175 |
| BBH | 5d00062 | um02686.2 | 0         | um02686.2 | 5d00062  | 0         |
| BBH | 5c00126 | um02572   | 1.00E-176 | um02572   | 5c00126  | 1.00E-180 |
| NNN | 5c00146 | um02535   | 9.00E-13  | um02535   | 5c00145  | 1.00E-14  |
| BBH | 5d00138 | um02525.2 | 0         | um02525.2 | 5d00138  | 0         |
| BBH | 5d00097 | um02635   | 3.00E-85  | um02635   | 5d00097  | 5.00E-86  |
| BBH | 5d00142 | um02520   | 0         | um02520   | 5d00142  | 0         |
| BBH | 5c00056 | um02694   | 1.00E-63  | um02694   | 5c00056  | 4.00E-67  |
| BBH | 5c00117 | um02585   | 0         | um02585   | 5c00117  | 0         |
| BBH | 5d00002 | um02801   | 0         | um02801   | 5d00002  | 0         |
| BBH | 5c00084 | um12194   | 1.00E-163 | um12194   | 5c00084  | 1.00E-159 |
| BBH | 5d00050 | um02697   | 0         | um02697   | 5d00050  | 0         |
| BBH | 5d00128 | um02557   | 0         | um02557   | 5d00128  | 0         |
| BBH | 5d00018 | um02763   | 0         | um02763   | 5d00018  | 0         |
| BBH | 5c00036 | um11723   | 0         | um11723   | 5c00036  | 0         |
| BBH | 5c00134 | um02553   | 1.00E-133 | um02553   | 5c00134  | 1.00E-118 |
| BBH | 5c00070 | um02672   | 8.00E-56  | um02672   | 5c00070  | 4.00E-51  |
| NNN | 5c00100 | um15047   | 0         |           |          |           |
| BBH | 5c00109 | um02603   | 0         | um02603   | 5c00109  | 0         |
| BBH | 5c00018 | um02771   | 8.00E-89  | um02771   | 5c00018  | 9.00E-91  |
| BBH | 5d00104 | um10283   | 0         | um10283   | 5d00104  | 0         |
| BBH | 5c00133 | um02555   | 1.00E-106 | um02555   | 5c00133  | 1.00E-113 |
| BBH | 5d00022 | um02752   | 0         | um02752   | 5d00022  | 0         |
| BBH | 5d00055 | um11924   | 0         | um11924   | 5d00055  | 0         |
| BBH | 5c00038 | um02730   | 0         | um02730   | 5c00038  | 0         |
| BBH | 5c00041 | um02721   | 1.00E-117 | um02721   | 5c00041  | 1.00E-119 |
| BBH | 5d00014 | um02772   | 1.00E-96  | um02772   | 5d00014  | 9.00E-99  |
| BBH | 5d00113 | um02587   | 0         | um02587   | 5d00113  | 0         |
| BBH | 5c00055 | um02696   | 0         | um02696   | 5c00055  | 0         |
| BBH | 5c00119 | um02582   | 0         | um02582   | 5c00119  | 0         |
| BBH | 5c00087 | um10300   | 0         | um10300   | 5c00087  | 0         |
| BBH | 5d00046 | um02704   | 0         | um02704   | 5d00046  | 0         |
| BBH | 5d00073 | um10306   | 1.00E-125 | um10306   | 5d00073  | 1.00E-127 |
| BBH | 5c00106 | um02606   | 1.00E-145 | um02606   | 5c00106  | 1.00E-120 |
| BBH | 5c00021 | um11931   | 1.00E-83  | um11931   | 5c00021  | 7.00E-87  |
| BBH | 5d00124 | um10276   | 0         | um10276   | 5d00124  | 0         |
| NNN | 5c00080 | um10304   | 1.00E-170 |           |          |           |
| BBH | 5d00036 | um02724   | 0         | um02724   | 5d00036  | 0         |
| BBH | 5d00074 | um02659.2 | 1.00E-128 | um02659.2 | 5d00074  | 1.00E-137 |
| BBH | 5d00131 | um02549   | 1.00E-61  | um02549   | 5d00131  | 2.00E-87  |
| BBH | 5d00030 | um11724   | 1.00E-119 | um11724   | 5d00030  | 1.00E-128 |
| BBH | 5d00080 | um10299   | 2.00E-95  | um10299   | 5d00080  | 1.00E-91  |
| BBH | 5d00087 | um02637   | 1.00E-166 | um02637   | 5d00087  | 1.00E-174 |
| BBH | 5d00127 | um02559   | 2.00E-61  | um02559   | 5d00127  | 3.00E-61  |
| BBH | 5c00151 | um02526   | 2.00E-55  | um02526   | 5c00151  | 3.00E-47  |
| BBH | 5c00155 | um02517   | 0         | um02517   | 5c00155  | 0         |
| BBH | 5c00028 | um11929   | 0         | um11929   | 5c00028  | 0         |
| BBH | 5d00101 | um12193.2 | 0         | um12193.2 | 5d00101  | 0         |
| BBH | 5c00031 | um02739   | 0         | um02739   | 5c00031  | 0         |
| BBH | 5d00040 | um02710   | 4.00E-34  | um02710   | 5d00040  | 4.00E-34  |
| NNN | 5c00004 | um01711   | 3.00E-65  | um01711   | 22d00133 | 0         |
| BBH | 5d00129 | um02554   | 0         | um02554   | 5d00129  | 0         |
| BBH | 5d00056 | um02690   | 1.00E-165 | um02690   | 5d00056  | 1.00E-152 |
| BBH | 5d00021 | um02753   | 5.00E-99  | um02753   | 5d00021  | 1.00E-96  |
| NNN | 5c00152 | um02524   | 0         |           |          |           |
| NNN | 5c00012 | um10602   | 0         |           |          |           |

|     |         |           |           |           |         |           |
|-----|---------|-----------|-----------|-----------|---------|-----------|
| BBH | 5d00081 | um02645   | 1.00E-77  | um02645   | 5d00081 | 1.00E-78  |
| BBH | 5d00013 | um10598   | 1.00E-80  | um10598   | 5d00013 | 1.00E-80  |
| BBH | 5c00015 | um02775   | 2.00E-75  | um02775   | 5c00015 | 2.00E-76  |
| BBH | 5d00026 | um02740   | 0         | um02740   | 5d00026 | 0         |
| BBH | 5d00066 | um10309   | 0         | um10309   | 5d00066 | 0         |
| NNN | 5c00086 | um10301   | 7.00E-85  |           |         |           |
| BBH | 5d00132 | um02548   | 0         | um02548   | 5d00132 | 0         |
| BBH | 5c00103 | um02613   | 0         | um02613   | 5c00103 | 0         |
| BBH | 5d00045 | um11717   | 0         | um11717   | 5d00045 | 0         |
| BBH | 5c00136 | um02550   | 2.00E-38  | um02550   | 5c00136 | 4.00E-36  |
| BBH | 5c00049 | um11718   | 0         | um11718   | 5c00049 | 0         |
| BBH | 5c00066 | um02688   | 1.00E-137 | um02688   | 5c00066 | 1.00E-149 |
| BBH | 5d00007 | um02783   | 0         | um02783   | 5d00007 | 0         |
| BBH | 5d00016 | um10597   | 2.00E-92  | um10597   | 5d00016 | 1.00E-103 |
| BBH | 5c00129 | um02560   | 4.00E-98  | um02560   | 5c00129 | 4.00E-98  |
| BBH | 5d00024 | um02751   | 8.00E-73  | um02751   | 5d00024 | 9.00E-76  |
| BBH | 5d00038 | um02718   | 0         | um02718   | 5d00038 | 0         |
| BBH | 5c00156 | um11411   | 3.00E-50  | um11411   | 5c00156 | 2.00E-51  |
| BBH | 5d00035 | um02723.2 | 0         | um02723.2 | 5d00035 | 0         |
| BBH | 5d00095 | um02631   | 0         | um02631   | 5d00095 | 0         |
| BBH | 5d00048 | um02708   | 5.00E-17  | um02708   | 5d00048 | 3.00E-31  |
| BBH | 5c00140 | um02543   | 0         | um02543   | 5c00140 | 0         |
| BBH | 5c00072 | um02684   | 1.00E-163 | um02684   | 5c00072 | 1.00E-164 |
| BBH | 5d00121 | um10277.2 | 0         | um10277.2 | 5d00121 | 0         |
| BBH | 5c00078 | um02663   | 1.00E-122 | um02663   | 5c00078 | 1.00E-118 |
| BBH | 5c00039 | um02729   | 1.00E-145 | um02729   | 5c00039 | 1.00E-147 |
| BBH | 5c00124 | um02576   | 0         | um02576   | 5c00124 | 0         |
| BBH | 5d00065 | um10310   | 1.00E-157 | um10310   | 5d00065 | 1.00E-159 |
| BBH | 5c00007 | um02797   | 6.00E-37  | um02797   | 5c00007 | 1.00E-34  |
| BBH | 5d00102 | um02614   | 0         | um02614   | 5d00102 | 0         |
| BBH | 5d00088 | um10290   | 0         | um10290   | 5d00088 | 0         |
| BBH | 5c00093 | um02625   | 0         | um02625   | 5c00093 | 0         |
| BBH | 5d00008 | um02782   | 0         | um02782   | 5d00008 | 0         |
| BBH | 5c00128 | um02562   | 0         | um02562   | 5c00128 | 0         |
| NNN | 5d00116 | um02579   | 2.00E-90  |           |         |           |
| NNN | 5c00046 | um02716   | 2.00E-40  |           |         |           |
| BBH | 5d00009 | um02779   | 0         | um02779   | 5d00009 | 0         |
| BBH | 5d00133 | um11713   | 0         | um11713   | 5d00133 | 0         |
| BBH | 5c00074 | um02682   | 0         | um02682   | 5c00074 | 0         |
| BBH | 5c00089 | um02640   | 1.00E-179 | um02640   | 5c00089 | 0         |
| BBH | 5d00075 | um02657   | 0         | um02657   | 5d00075 | 0         |
| BBH | 5d00147 | um11409   | 0         | um11409   | 5d00147 | 0         |
| BBH | 5d00044 | um11719   | 1.00E-137 | um11719   | 5d00044 | 1.00E-137 |
| BBH | 5c00107 | um02605.2 | 0         | um02605.2 | 5c00107 | 0         |
| BBH | 5d00140 | um02523   | 1.00E-102 | um02523   | 5d00140 | 1.00E-103 |
| BBH | 5c00069 | um02674   | 7.00E-34  | um02674   | 5c00069 | 4.00E-30  |
| BBH | 5c00014 | um02777   | 1.00E-125 | um02777   | 5c00014 | 1.00E-125 |
| BBH | 5c00023 | um02758   | 1.00E-175 | um02758   | 5c00023 | 1.00E-175 |
| BBH | 5c00130 | um02558   | 1.00E-140 | um02558   | 5c00130 | 1.00E-151 |
| BBH | 5c00033 | um11725   | 1.00E-178 | um11725   | 5c00033 | 0         |
| BBH | 5c00135 | um02551   | 4.00E-35  | um02551   | 5c00135 | 2.00E-40  |
| BBH | 5c00139 | um15046   | 1.00E-173 | um15046   | 5c00139 | 1.00E-173 |
| BBH | 5d00053 | um02703   | 0         | um02703   | 5d00053 | 0         |
| BBH | 5c00095 | um02630   | 0         | um02630   | 5c00095 | 0         |
| BBH | 5d00063 | um02687   | 0         | um02687   | 5d00063 | 0         |
| BBH | 5c00141 | um02542   | 1.00E-103 | um02542   | 5c00141 | 1.00E-100 |
| BBH | 5c00104 | um02611   | 6.00E-83  | um02611   | 5c00104 | 8.00E-97  |
| BBH | 5c00006 | um10607   | 3.00E-37  | um10607   | 5c00006 | 1.00E-42  |
| BBH | 5d00025 | um02743   | 1.00E-142 | um02743   | 5d00025 | 1.00E-144 |
| BBH | 5d00049 | um02693   | 0         | um02693   | 5d00049 | 0         |
| BBH | 5d00034 | um11722   | 1.00E-174 | um11722   | 5d00034 | 1.00E-175 |
| NNN | 5c00035 | um02736   | 3.00E-15  | um02736   | 5c00034 | 0         |

|     |         |           |           |           |          |           |
|-----|---------|-----------|-----------|-----------|----------|-----------|
| BBH | 5c00088 | um10296   | 2.00E-37  | um10296   | 5c00088  | 9.00E-38  |
| BBH | 5d00093 | um02629   | 1.00E-139 | um02629   | 5d00093  | 1.00E-139 |
| BBH | 5c00122 | um02578   | 0         | um02578   | 5c00122  | 0         |
| BBH | 5d00146 | um02514.2 | 1.00E-63  | um02514.2 | 5d00146  | 1.00E-63  |
| BBH | 5c00068 | um10312   | 8.00E-42  | um10312   | 5c00068  | 8.00E-42  |
| BBH | 5d00043 | um02713   | 1.00E-111 | um02713   | 5d00043  | 1.00E-106 |
| BBH | 5d00005 | um02791   | 0         | um02791   | 5d00005  | 0         |
| BBH | 5d00134 | um11418   | 2.00E-22  | um11418   | 5d00134  | 4.00E-22  |
| BBH | 5c00127 | um12192   | 5.00E-72  | um12192   | 5c00127  | 3.00E-66  |
| BBH | 5c00047 | um02715   | 0         | um02715   | 5c00047  | 0         |
| BBH | 5c00081 | um02656   | 0         | um02656   | 5c00081  | 0         |
| BBH | 5d00028 | um11728   | 3.00E-46  | um11728   | 5d00028  | 5.00E-46  |
| NNN | 5c00160 | um11407   | 0         |           |          |           |
| BBH | 5c00040 | um02727   | 5.00E-82  | um02727   | 5c00040  | 2.00E-83  |
| BBH | 5d00083 | um10297   | 1.00E-121 | um10297   | 5d00083  | 1.00E-130 |
| BBH | 5d00076 | um02655   | 5.00E-55  | um02655   | 5d00076  | 2.00E-51  |
| BBH | 5c00159 | um11408.2 | 1.00E-165 | um11408.2 | 5c00159  | 1.00E-165 |
| BBH | 5c00017 | um02773   | 4.00E-45  | um02773   | 5c00017  | 4.00E-45  |
| BBH | 5d00123 | um02567   | 1.00E-168 | um02567   | 5d00123  | 1.00E-163 |
| NNN | 5d00023 | um05151   | 1.00E-29  | um05151   | 2d00033  | 1.00E-142 |
| BBH | 5c00075 | um02669.2 | 2.00E-90  | um02669.2 | 5c00075  | 2.00E-90  |
| BBH | 5c00067 | um02677   | 0         | um02677   | 5c00067  | 0         |
| BBH | 5c00009 | um10606   | 0         | um10606   | 5c00009  | 0         |
| BBH | 5c00094 | um02627   | 7.00E-44  | um02627   | 5c00094  | 1.00E-45  |
| BBH | 5d00107 | um02598   | 0         | um02598   | 5d00107  | 0         |
| BBH | 5c00030 | um02741   | 0         | um02741   | 5c00030  | 0         |
| BBH | 5d00145 | um02516   | 2.00E-75  | um02516   | 5d00145  | 1.00E-77  |
| BBH | 5c00060 | um11923   | 0         | um11923   | 5c00060  | 0         |
| BBH | 5c00121 | um02580.2 | 1.00E-131 | um02580.2 | 5c00121  | 1.00E-125 |
| BBH | 5c00142 | um02540   | 1.00E-20  | um02540   | 5c00142  | 1.00E-20  |
| BBH | 5d00033 | um02731   | 0         | um02731   | 5d00033  | 1.00E-175 |
| BBH | 5c00110 | um02602   | 0         | um02602   | 5c00110  | 0         |
| BBH | 5c00020 | um10596   | 0         | um10596   | 5c00020  | 0         |
| BBH | 5d00082 | um02642   | 1.00E-76  | um02642   | 5d00082  | 2.00E-82  |
| NNN | 6c00077 | um10063   | 0         |           |          |           |
| BBH | 6c00044 | um02206   | 1.00E-147 | um02206   | 6c00044  | 1.00E-146 |
| BBH | 6d00095 | um02118   | 1.00E-165 | um02118   | 6d00095  | 1.00E-174 |
| BBH | 6c00022 | um15025   | 7.00E-72  | um15025   | 6c00022  | 1.00E-66  |
| BBH | 6c00124 | um11461   | 1.00E-174 | um11461   | 6c00124  | 1.00E-175 |
| BBH | 6c00008 | um05967   | 0         | um05967   | 6c00008  | 0         |
| BBH | 6c00121 | um02063   | 0         | um02063   | 6c00121  | 0         |
| BBH | 6c00130 | um11908   | 0         | um11908   | 6c00130  | 0         |
| BBH | 6c00115 | um02075   | 0         | um02075   | 6c00115  | 0         |
| BBH | 6d00076 | um02163   | 1.00E-127 | um02163   | 6d00076  | 1.00E-121 |
| BBH | 6d00042 | um02220   | 0         | um02220   | 6d00042  | 0         |
| BBH | 6c00026 | um12026   | 1.00E-133 | um12026   | 6c00026  | 1.00E-141 |
| BBH | 6d00082 | um02150   | 0         | um02150   | 6d00082  | 0         |
| BBH | 6c00094 | um11465   | 3.00E-43  | um11465   | 6c00094  | 2.00E-42  |
| BBH | 6c00064 | um02172   | 1.00E-171 | um02172   | 6c00064  | 1.00E-168 |
| BBH | 6c00083 | um02125   | 0         | um02125   | 6c00083  | 0         |
| BBH | 6d00025 | um02238   | 3.00E-55  | um02238   | 6d00025  | 6.00E-55  |
| BBH | 6c00007 | um05968   | 0         | um05968   | 6c00007  | 0         |
| BBH | 6d00061 | um10067   | 7.00E-47  | um10067   | 6d00061  | 1.00E-48  |
| BBH | 6c00109 | um15090   | 0         | um15090   | 6c00109  | 0         |
| BBH | 6d00060 | um02190.2 | 1.00E-41  | um02190.2 | 6d00060  | 5.00E-33  |
| BBH | 6d00124 | um02055   | 0         | um02055   | 6d00124  | 0         |
| NNN | 6c00015 | um11635   | 4.00E-22  | um11635   | 13c00107 | 8.00E-87  |
| BBH | 6d00101 | um02101   | 2.00E-72  | um02101   | 6d00101  | 4.00E-72  |
| BBH | 6d00094 | um10055   | 0         | um10055   | 6d00094  | 0         |
| BBH | 6d00119 | um02066   | 1.00E-101 | um02066   | 6d00119  | 1.00E-129 |
| BBH | 6d00038 | um02226   | 1.00E-129 | um02226   | 6d00038  | 1.00E-139 |
| BBH | 6d00114 | um11911   | 1.00E-148 | um11911   | 6d00114  | 1.00E-148 |

|     |         |           |           |           |         |           |
|-----|---------|-----------|-----------|-----------|---------|-----------|
| BBH | 6d00008 | um05964   | 0         | um05964   | 6d00008 | 0         |
| BBH | 6c00060 | um02178   | 1.00E-144 | um02178   | 6c00060 | 1.00E-143 |
| NNN | 6d00015 | um05944   | 1.00E-11  |           |         |           |
| BBH | 6c00129 | um02045   | 4.00E-43  | um02045   | 6c00129 | 8.00E-43  |
| BBH | 6d00054 | um02793   | 0         | um02793   | 6d00054 | 0         |
| BBH | 6c00123 | um11462   | 1.00E-141 | um11462   | 6c00123 | 1.00E-151 |
| BBH | 6c00078 | um02134   | 1.00E-138 | um02134   | 6c00078 | 1.00E-129 |
| BBH | 6d00135 | um15031   | 0         | um15031   | 6d00135 | 0         |
| BBH | 6d00053 | um02203   | 0         | um02203   | 6d00053 | 0         |
| NNN | 6d00022 | um05928   | 2.00E-17  | um05928   | 6d00023 | 5.00E-26  |
| BBH | 6c00137 | um06493   | 0         | um06493   | 6c00137 | 0         |
| BBH | 6c00021 | um12066   | 2.00E-96  | um12066   | 6c00021 | 7.00E-89  |
| BBH | 6c00042 | um02208   | 0         | um02208   | 6c00042 | 0         |
| BBH | 6c00025 | um05937   | 0         | um05937   | 6c00025 | 0         |
| BBH | 6c00055 | um02185   | 8.00E-83  | um02185   | 6c00055 | 5.00E-83  |
| BBH | 6c00099 | um12182   | 2.00E-74  | um12182   | 6c00099 | 6.00E-73  |
| NNN | 6c00103 | um02103   | 3.00E-69  |           |         |           |
| BBH | 6c00002 | um05974   | 1.00E-118 | um05974   | 6c00002 | 1.00E-110 |
| BBH | 6c00116 | um11912   | 1.00E-156 | um11912   | 6c00116 | 1.00E-172 |
| BBH | 6d00129 | um02046   | 1.00E-134 | um02046   | 6d00129 | 1.00E-137 |
| BBH | 6d00075 | um02164   | 0         | um02164   | 6d00075 | 0         |
| BBH | 6c00043 | um02207   | 0         | um02207   | 6c00043 | 0         |
| BBH | 6c00058 | um10066   | 2.00E-58  | um10066   | 6c00058 | 2.00E-58  |
| BBH | 6d00083 | um02156.2 | 6.00E-85  | um02156.2 | 6d00083 | 8.00E-88  |
| BBH | 6c00086 | um10056   | 0         | um10056   | 6c00086 | 0         |
| BBH | 6d00016 | um05942   | 1.00E-138 | um05942   | 6d00016 | 1.00E-168 |
| BBH | 6c00063 | um02175   | 0         | um02175   | 6c00063 | 0         |
| BBH | 6c00110 | um15077   | 0         | um15077   | 6c00110 | 0         |
| BBH | 6d00069 | um10064   | 0         | um10064   | 6d00069 | 0         |
| BBH | 6d00068 | um02179   | 6.00E-95  | um02179   | 6d00068 | 1.00E-86  |
| BBH | 6d00032 | um02229   | 7.00E-26  | um02229   | 6d00032 | 7.00E-26  |
| BBH | 6c00036 | um02221   | 0         | um02221   | 6c00036 | 0         |
| BBH | 6c00117 | um15045   | 0         | um15045   | 6c00117 | 0         |
| BBH | 6d00104 | um02113   | 7.00E-43  | um02113   | 6d00104 | 1.00E-50  |
| BBH | 6d00113 | um11913   | 0         | um11913   | 6d00113 | 0         |
| BBH | 6d00012 | um05951   | 0         | um05951   | 6d00012 | 0         |
| BBH | 6d00126 | um02052   | 0         | um02052   | 6d00126 | 0         |
| BBH | 6c00101 | um02102   | 0         | um02102   | 6c00101 | 0         |
| BBH | 6d00074 | um02165   | 2.00E-95  | um02165   | 6d00074 | 2.00E-95  |
| BBH | 6c00114 | um02077   | 1.00E-105 | um02077   | 6c00114 | 1.00E-107 |
| BBH | 6c00006 | um05971   | 0         | um05971   | 6c00006 | 0         |
| BBH | 6c00039 | um02216   | 1.00E-114 | um02216   | 6c00039 | 1.00E-119 |
| BBH | 6c00108 | um02088   | 1.00E-147 | um02088   | 6c00108 | 1.00E-145 |
| BBH | 6c00091 | um02116   | 0         | um02116   | 6c00091 | 0         |
| BBH | 6d00080 | um02147   | 0         | um02147   | 6d00080 | 0         |
| BBH | 6d00120 | um02064   | 4.00E-53  | um02064   | 6d00120 | 8.00E-54  |
| BBH | 6c00080 | um10060.2 | 6.00E-99  | um10060.2 | 6c00080 | 1.00E-112 |
| BBH | 6d00045 | um02215   | 0         | um02215   | 6d00045 | 0         |
| BBH | 6c00071 | um02158   | 0         | um02158   | 6c00071 | 0         |
| BBH | 6c00136 | um06491   | 0         | um06491   | 6c00136 | 0         |
| BBH | 6c00041 | um10073   | 0         | um10073   | 6c00041 | 0         |
| BBH | 6d00108 | um12181   | 0         | um12181   | 6d00108 | 0         |
| BBH | 6c00050 | um02198   | 4.00E-73  | um02198   | 6c00050 | 5.00E-73  |
| BBH | 6d00089 | um02133   | 1.00E-124 | um02133   | 6d00089 | 1.00E-112 |
| BBH | 6c00127 | um11458   | 0         | um11458   | 6c00127 | 0         |
| BBH | 6c00017 | um05952   | 0         | um05952   | 6c00017 | 0         |
| BBH | 6d00117 | um02070   | 1.00E-110 | um02070   | 6d00117 | 1.00E-113 |
| BBH | 6d00092 | um02127   | 1.00E-75  | um02127   | 6d00092 | 2.00E-76  |
| BBH | 6c00052 | um02191   | 1.00E-145 | um02191   | 6c00052 | 1.00E-151 |
| NNN | 6c00062 | um10065   | 4.00E-70  |           |         |           |
| BBH | 6d00056 | um02197   | 1.00E-162 | um02197   | 6d00056 | 1.00E-156 |
| BBH | 6d00044 | um02217   | 0         | um02217   | 6d00044 | 0         |

|     |         |           |           |           |         |           |
|-----|---------|-----------|-----------|-----------|---------|-----------|
| BBH | 6c00072 | um02144   | 0         | um02144   | 6c00072 | 0         |
| BBH | 6d00050 | um10072   | 0         | um10072   | 6d00050 | 0         |
| BBH | 6c00066 | um02168.2 | 0         | um02168.2 | 6c00066 | 0         |
| NNN | 6c00107 | um11470   | 9.00E-44  |           |         |           |
| BBH | 6c00088 | um02202   | 4.00E-63  | um02202   | 6c00088 | 4.00E-71  |
| BBH | 6c00085 | um02123   | 0         | um02123   | 6c00085 | 0         |
| BBH | 6d00067 | um02180   | 0         | um02180   | 6d00067 | 0         |
| BBH | 6c00100 | um12183   | 0         | um12183   | 6c00100 | 0         |
| BBH | 6c00027 | um12025   | 1.00E-121 | um12025   | 6c00027 | 1.00E-133 |
| BBH | 6c00122 | um02062   | 0         | um02062   | 6c00122 | 0         |
| BBH | 6c00092 | um02115   | 0         | um02115   | 6c00092 | 0         |
| BBH | 6c00038 | um02218   | 0         | um02218   | 6c00038 | 0         |
| BBH | 6d00073 | um02166   | 0         | um02166   | 6d00073 | 0         |
| NNN | 6c00102 | um02103   | 1.00E-108 |           |         |           |
| BBH | 6d00107 | um02089   | 0         | um02089   | 6d00107 | 1.00E-171 |
| BBH | 6d00102 | um02108   | 0         | um02108   | 6d00102 | 0         |
| BBH | 6c00135 | um12074   | 0         | um12074   | 6c00135 | 0         |
| BBH | 6c00005 | um05972   | 0         | um05972   | 6c00005 | 0         |
| BBH | 6c00061 | um02177.2 | 0         | um02177.2 | 6c00061 | 0         |
| BBH | 6d00007 | um05966   | 0         | um05966   | 6d00007 | 0         |
| BBH | 6d00081 | um02148   | 0         | um02148   | 6d00081 | 0         |
| BBH | 6c00082 | um02126   | 1.00E-156 | um02126   | 6c00082 | 1.00E-170 |
| BBH | 6d00047 | um02211   | 0         | um02211   | 6d00047 | 1.00E-180 |
| BBH | 6d00055 | um02199   | 1.00E-119 | um02199   | 6d00055 | 1.00E-123 |
| BBH | 6d00123 | um11460   | 0         | um11460   | 6d00123 | 0         |
| NNN | 6d00091 | um10059   | 7.00E-33  |           |         |           |
| BBH | 6d00014 | um05947.2 | 2.00E-69  | um05947.2 | 6d00014 | 7.00E-80  |
| BBH | 6d00093 | um10057   | 1.00E-65  | um10057   | 6d00093 | 2.00E-65  |
| BBH | 6c00065 | um02169   | 0         | um02169   | 6c00065 | 0         |
| NNN | 6d00072 | um02167   | 1.00E-152 |           |         |           |
| BBH | 6d00019 | um05936   | 1.00E-135 | um05936   | 6d00019 | 1.00E-135 |
| BBH | 6c00032 | um02235   | 0         | um02235   | 6c00032 | 0         |
| BBH | 6d00021 | um05933   | 0         | um05933   | 6d00021 | 0         |
| NNN | 6d00087 | um02135   | 2.00E-29  | um02135   | 6d00088 | 1.00E-30  |
| BBH | 6c00112 | um11915   | 3.00E-34  | um11915   | 6c00112 | 1.00E-33  |
| BBH | 6d00066 | um02181   | 0         | um02181   | 6d00066 | 0         |
| BBH | 6d00026 | um02151   | 1.00E-136 | um02151   | 6d00026 | 1.00E-136 |
| BBH | 6d00058 | um02196   | 4.00E-27  | um02196   | 6d00058 | 3.00E-29  |
| BBH | 6d00037 | um02227   | 0         | um02227   | 6d00037 | 0         |
| BBH | 6d00128 | um11910   | 1.00E-173 | um11910   | 6d00128 | 1.00E-177 |
| BBH | 6d00115 | um02072   | 1.00E-140 | um02072   | 6d00115 | 1.00E-140 |
| BBH | 6c00106 | um02104.2 | 0         | um02104.2 | 6c00106 | 0         |
| BBH | 6d00110 | um02081   | 0         | um02081   | 6d00110 | 0         |
| BBH | 6c00011 | um05961   | 1.00E-178 | um05961   | 6c00011 | 0         |
| BBH | 6c00079 | um02132   | 1.00E-122 | um02132   | 6c00079 | 1.00E-129 |
| BBH | 6c00070 | um02159   | 0         | um02159   | 6c00070 | 0         |
| BBH | 6d00105 | um02111   | 1.00E-142 | um02111   | 6d00105 | 1.00E-142 |
| BBH | 6d00100 | um11468   | 0         | um11468   | 6d00100 | 0         |
| BBH | 6c00059 | um02182   | 1.00E-154 | um02182   | 6c00059 | 1.00E-154 |
| BBH | 6c00120 | um02065   | 0         | um02065   | 6c00120 | 0         |
| BBH | 6d00010 | um10863   | 1.00E-172 | um10863   | 6d00010 | 1.00E-169 |
| NNN | 6c00048 | um10071   | 6.00E-37  |           |         |           |
| BBH | 6c00045 | um02201.2 | 1.00E-139 | um02201.2 | 6c00045 | 1.00E-135 |
| BBH | 6c00054 | um10069   | 1.00E-157 | um10069   | 6c00054 | 1.00E-155 |
| BBH | 6c00119 | um02068   | 8.00E-24  | um02068   | 6c00119 | 9.00E-26  |
| BBH | 6d00046 | um02212   | 0         | um02212   | 6d00046 | 0         |
| BBH | 6c00074 | um02149   | 2.00E-71  | um02149   | 6c00074 | 1.00E-72  |
| BBH | 6c00134 | um02035   | 1.00E-162 | um02035   | 6c00134 | 1.00E-152 |
| BBH | 6d00071 | um02170   | 1.00E-159 | um02170   | 6d00071 | 1.00E-159 |
| BBH | 6c00097 | um02095   | 1.00E-147 | um02095   | 6c00097 | 1.00E-151 |
| BBH | 6c00068 | um02162   | 4.00E-70  | um02162   | 6c00068 | 4.00E-70  |
| BBH | 6d00131 | um02039   | 1.00E-137 | um02039   | 6d00131 | 1.00E-137 |

|     |         |           |           |           |          |           |
|-----|---------|-----------|-----------|-----------|----------|-----------|
| BBH | 6c00081 | um02128   | 1.00E-101 | um02128   | 6c00081  | 7.00E-89  |
| BBH | 6d00079 | um12094   | 9.00E-41  | um12094   | 6d00079  | 9.00E-41  |
| BBH | 6d00065 | um12097   | 4.00E-33  | um12097   | 6d00065  | 4.00E-33  |
| BBH | 6c00098 | um02097   | 1.00E-164 | um02097   | 6c00098  | 1.00E-143 |
| BBH | 6c00031 | um05923   | 1.00E-128 | um05923   | 6c00031  | 1.00E-127 |
| BBH | 6c00133 | um11907.2 | 0         | um11907.2 | 6c00133  | 1.00E-180 |
| BBH | 6c00012 | um05960   | 0         | um05960   | 6c00012  | 0         |
| BBH | 6d00088 | um02135   | 3.00E-22  | um02135   | 6d00088  | 1.00E-30  |
| BBH | 6c00019 | um05949   | 0         | um05949   | 6c00019  | 0         |
| BBH | 6d00090 | um02131   | 1.00E-112 | um02131   | 6d00090  | 1.00E-105 |
| BBH | 6d00070 | um12096   | 1.00E-119 | um12096   | 6d00070  | 1.00E-122 |
| BBH | 6d00031 | um02232   | 7.00E-49  | um02232   | 6d00031  | 3.00E-47  |
| BBH | 6d00009 | um10864   | 7.00E-80  | um10864   | 6d00009  | 7.00E-80  |
| BBH | 6d00011 | um05954   | 1.00E-156 | um05954   | 6d00011  | 1.00E-163 |
| BBH | 6c00113 | um02079   | 1.00E-45  | um02079   | 6c00113  | 2.00E-47  |
| BBH | 6d00027 | um12316   | 0         | um12316   | 6d00027  | 0         |
| BBH | 6d00036 | um10075   | 1.00E-42  | um10075   | 6d00036  | 1.00E-42  |
| BBH | 6d00118 | um02067   | 1.00E-123 | um02067   | 6d00118  | 1.00E-132 |
| BBH | 6d00109 | um02083   | 0         | um02083   | 6d00109  | 0         |
| NNN | 6d00132 | um02037   | 0         |           |          |           |
| BBH | 6c00047 | um02794   | 2.00E-65  | um02794   | 6c00047  | 2.00E-64  |
| BBH | 6c00128 | um02049   | 0         | um02049   | 6c00128  | 0         |
| BBH | 6d00098 | um02093   | 1.00E-114 | um02093   | 6d00098  | 1.00E-101 |
| BBH | 6d00130 | um02044   | 0         | um02044   | 6d00130  | 0         |
| NNN | 6d00002 | um03408   | 4.00E-47  | um03408   | 8c00128  | 0         |
| BBH | 6d00041 | um02223   | 1.00E-174 | um02223   | 6d00041  | 1.00E-174 |
| BBH | 6c00067 | um12095   | 4.00E-43  | um12095   | 6c00067  | 6.00E-47  |
| BBH | 6c00090 | um02117   | 1.00E-115 | um02117   | 6c00090  | 1.00E-123 |
| BBH | 6c00051 | um10070   | 0         | um10070   | 6c00051  | 0         |
| NNN | 6d00125 | um02053   | 0         |           |          |           |
| BBH | 6c00056 | um11306   | 1.00E-37  | um11306   | 6c00056  | 1.00E-47  |
| BBH | 6d00103 | um11469   | 3.00E-88  | um11469   | 6d00103  | 8.00E-87  |
| BBH | 6d00040 | um02224   | 0         | um02224   | 6d00040  | 0         |
| BBH | 6d00030 | um02236   | 6.00E-88  | um02236   | 6d00030  | 2.00E-93  |
| BBH | 6c00013 | um05959   | 0         | um05959   | 6c00013  | 0         |
| BBH | 6d00028 | um10077   | 0         | um10077   | 6d00028  | 0         |
| NNN | 6d00003 | um04886   | 2.00E-15  | um04886   | 26d00001 | 0         |
| NNN | 6d00005 | um04046   | 4.00E-49  | um04046   | 13c00097 | 0         |
| BBH | 6d00039 | um02225   | 9.00E-98  | um02225   | 6d00039  | 2.00E-91  |
| BBH | 6d00017 | um05940   | 5.00E-66  | um05940   | 6d00017  | 1.00E-60  |
| NNN | 6c00030 | um05924   | 4.00E-25  | um05924   | 6c00108  | 1.00E-36  |
| BBH | 6d00097 | um02092   | 9.00E-46  | um02092   | 6d00097  | 1.00E-47  |
| BBH | 6d00063 | um10068   | 0         | um10068   | 6d00063  | 0         |
| BBH | 6c00095 | um02091   | 1.00E-148 | um02091   | 6c00095  | 1.00E-149 |
| BBH | 6c00035 | um10074   | 1.00E-44  | um10074   | 6c00035  | 9.00E-46  |
| BBH | 6c00132 | um02040   | 1.00E-166 | um02040   | 6c00132  | 1.00E-166 |
| BBH | 6c00024 | um05938   | 1.00E-135 | um05938   | 6c00024  | 1.00E-139 |
| BBH | 6c00104 | um02107   | 5.00E-74  | um02107   | 6c00104  | 1.00E-77  |
| BBH | 6c00118 | um02069   | 9.00E-59  | um02069   | 6c00118  | 6.00E-59  |
| BBH | 6c00126 | um11459.2 | 1.00E-104 | um11459.2 | 6c00126  | 1.00E-112 |
| BBH | 6c00020 | um10861   | 0         | um10861   | 6c00020  | 1.00E-177 |
| BBH | 6d00084 | um02157   | 0         | um02157   | 6d00084  | 0         |
| BBH | 6c00075 | um10062   | 0         | um10062   | 6c00075  | 0         |
| BBH | 6d00023 | um05925   | 0         | um05925   | 6d00023  | 0         |
| BBH | 6d00133 | um02034   | 1.00E-42  | um02034   | 6d00133  | 1.00E-42  |
| BBH | 6d00049 | um02209   | 0         | um02209   | 6d00049  | 0         |
| BBH | 6c00009 | um05965   | 4.00E-61  | um05965   | 6c00009  | 2.00E-61  |
| BBH | 6c00014 | um05958   | 0         | um05958   | 6c00014  | 0         |
| BBH | 6d00096 | um11464   | 3.00E-59  | um11464   | 6d00096  | 4.00E-59  |
| BBH | 6d00029 | um02234   | 3.00E-62  | um02234   | 6d00029  | 3.00E-62  |
| BBH | 6d00004 | um15026   | 0         | um15026   | 6d00004  | 0         |
| BBH | 6d00006 | um10898   | 1.00E-144 | um10898   | 6d00006  | 1.00E-144 |



|     |         |           |           |           |         |           |
|-----|---------|-----------|-----------|-----------|---------|-----------|
| BBH | 6c00105 | um02105   | 1.00E-137 | um02105   | 6c00105 | 1.00E-144 |
| NNN | 6c00053 | um02189   | 1.00E-166 |           |         |           |
| BBH | 6c00010 | um10865   | 1.00E-150 | um10865   | 6c00010 | 1.00E-150 |
| BBH | 6d00121 | um04109   | 3.00E-56  | um04109   | 6d00121 | 9.00E-59  |
| BBH | 6d00116 | um02071   | 6.00E-35  | um02071   | 6d00116 | 5.00E-30  |
| BBH | 6d00127 | um02050   | 0         | um02050   | 6d00127 | 0         |
| BBH | 6d00077 | um02160   | 0         | um02160   | 6d00077 | 0         |
| BBH | 6c00033 | um02237   | 0         | um02237   | 6c00033 | 0         |
| BBH | 6d00062 | um02186   | 1.00E-59  | um02186   | 6d00062 | 8.00E-66  |
| BBH | 6d00020 | um05934   | 1.00E-106 | um05934   | 6d00020 | 1.00E-97  |
| BBH | 6d00052 | um02204   | 0         | um02204   | 6d00052 | 0         |
| BBH | 6d00018 | um05939   | 1.00E-69  | um05939   | 6d00018 | 7.00E-67  |
| BBH | 6d00043 | um12099   | 1.00E-37  | um12099   | 6d00043 | 1.00E-45  |
| BBH | 6c00069 | um02161   | 0         | um02161   | 6c00069 | 0         |
| BBH | 6c00131 | um02041   | 1.00E-166 | um02041   | 6c00131 | 1.00E-153 |
| BBH | 6c00023 | um12027   | 1.00E-54  | um12027   | 6c00023 | 1.00E-54  |
| BBH | 6c00093 | um02114   | 1.00E-132 | um02114   | 6c00093 | 1.00E-120 |
| BBH | 6d00078 | um10061   | 4.00E-66  | um10061   | 6d00078 | 2.00E-62  |
| BBH | 6c00073 | um02146   | 0         | um02146   | 6c00073 | 0         |
| BBH | 6c00034 | um11189   | 0         | um11189   | 6c00034 | 0         |
| BBH | 6c00096 | um02094   | 9.00E-56  | um02094   | 6c00096 | 1.00E-55  |
| NNN | 6c00049 | um02213   | 0         |           |         |           |
| BBH | 6d00106 | um11472   | 3.00E-98  | um11472   | 6d00106 | 1.00E-103 |
| BBH | 6c00111 | um11916   | 1.00E-42  | um11916   | 6c00111 | 1.00E-42  |
| BBH | 6d00134 | um11905   | 0         | um11905   | 6d00134 | 0         |
| BBH | 6c00076 | um02154   | 0         | um02154   | 6c00076 | 0         |
| BBH | 6c00040 | um02214.2 | 1.00E-177 | um02214.2 | 6c00040 | 1.00E-173 |
| BBH | 6d00085 | um02142   | 0         | um02142   | 6d00085 | 0         |
| BBH | 6c00125 | um02057   | 0         | um02057   | 6c00125 | 0         |
| BBH | 6c00084 | um02124   | 1.00E-100 | um02124   | 6c00084 | 1.00E-101 |
| BBH | 7c00025 | um05862   | 0         | um05862   | 7c00025 | 0         |
| BBH | 7d00066 | um02249   | 0         | um02249   | 7d00066 | 0         |
| BBH | 7d00146 | um01250   | 0         | um01250   | 7d00146 | 0         |
| BBH | 7d00030 | um05854   | 0         | um05854   | 7d00030 | 0         |
| BBH | 7c00053 | um05917   | 0         | um05917   | 7c00053 | 0         |
| BBH | 7c00260 | um01012   | 0         | um01012   | 7c00260 | 0         |
| BBH | 7d00114 | um02353   | 5.00E-84  | um02353   | 7d00114 | 2.00E-84  |
| BBH | 7d00216 | um01112   | 1.00E-133 | um01112   | 7d00216 | 1.00E-129 |
| BBH | 7c00359 | um05247   | 0         | um05247   | 7c00359 | 0         |
| BBH | 7d00138 | um01265   | 8.00E-71  | um01265   | 7d00138 | 3.00E-86  |
| BBH | 7c00269 | um00992   | 0         | um00992   | 7c00269 | 0         |
| BBH | 7c00061 | um02242   | 1.00E-171 | um02242   | 7c00061 | 1.00E-169 |
| BBH | 7c00186 | um11652   | 2.00E-60  | um11652   | 7c00186 | 3.00E-64  |
| BBH | 7c00296 | um00896   | 0         | um00896   | 7c00296 | 0         |
| BBH | 7c00278 | um04984   | 9.00E-88  | um04984   | 7c00278 | 1.00E-96  |
| BBH | 7c00038 | um05889   | 0         | um05889   | 7c00038 | 0         |
| BBH | 7d00213 | um01115   | 0         | um01115   | 7d00213 | 0         |
| BBH | 7d00326 | um00886   | 0         | um00886   | 7d00326 | 0         |
| BBH | 7c00075 | um11396   | 0         | um11396   | 7c00075 | 0         |
| BBH | 7d00009 | um11191   | 0         | um11191   | 7d00009 | 0         |
| BBH | 7d00229 | um01087   | 0         | um01087   | 7d00229 | 0         |
| BBH | 7c00002 | um05801   | 0         | um05801   | 7c00002 | 0         |
| BBH | 7c00167 | um01186   | 0         | um01186   | 7c00167 | 0         |
| BBH | 7c00211 | um11283   | 1.00E-121 | um11283   | 7c00211 | 1.00E-120 |
| BBH | 7d00300 | um00947   | 0         | um00947   | 7d00300 | 0         |
| BBH | 7c00206 | um01121   | 1.00E-138 | um01121   | 7c00206 | 1.00E-138 |
| BBH | 7d00044 | um05891   | 2.00E-69  | um05891   | 7d00044 | 8.00E-64  |
| BBH | 7d00293 | um10587   | 0         | um10587   | 7d00293 | 0         |
| BBH | 7d00080 | um02282   | 1.00E-93  | um02282   | 7d00080 | 1.00E-93  |
| BBH | 7d00305 | um10611   | 2.00E-28  | um10611   | 7d00305 | 2.00E-28  |
| BBH | 7c00110 | um02297   | 7.00E-16  | um02297   | 7c00110 | 1.00E-15  |
| BBH | 7d00241 | um11852   | 0         | um11852   | 7d00241 | 0         |

|     |         |           |           |           |         |           |
|-----|---------|-----------|-----------|-----------|---------|-----------|
| BBH | 7d00092 | um02304   | 2.00E-25  | um02304   | 7d00092 | 8.00E-23  |
| BBH | 7c00121 | um02357   | 0         | um02357   | 7c00121 | 0         |
| BBH | 7c00228 | um11277   | 2.00E-93  | um11277   | 7c00228 | 2.00E-93  |
| BBH | 7d00048 | um05899   | 1.00E-107 | um05899   | 7d00048 | 1.00E-98  |
| BBH | 7c00114 | um02345   | 3.00E-91  | um02345   | 7c00114 | 1.00E-89  |
| BBH | 7c00273 | um00990   | 1.00E-121 | um00990   | 7c00273 | 1.00E-122 |
| BBH | 7c00081 | um02276   | 1.00E-86  | um02276   | 7c00081 | 7.00E-96  |
| BBH | 7c00007 | um11187   | 4.00E-85  | um11187   | 7c00007 | 7.00E-94  |
| BBH | 7c00070 | um02254   | 7.00E-53  | um02254   | 7c00070 | 9.00E-55  |
| NNN | 7d00170 | um01200   | 0         |           |         |           |
| BBH | 7d00272 | um00988   | 1.00E-111 | um00988   | 7d00272 | 1.00E-116 |
| BBH | 7d00279 | um00982   | 1.00E-75  | um00982   | 7d00279 | 7.00E-76  |
| BBH | 7d00154 | um10593   | 0         | um10593   | 7d00154 | 0         |
| NNN | 7c00042 | um05894   | 3.00E-50  | um05894   | 7c00041 | 5.00E-88  |
| BBH | 7c00245 | um01045   | 1.00E-148 | um01045   | 7c00245 | 1.00E-145 |
| BBH | 7d00355 | um00841   | 0         | um00841   | 7d00355 | 0         |
| BBH | 7d00002 | um11184   | 0         | um11184   | 7d00002 | 0         |
| NNN | 7d00334 | um10570   | 1.00E-170 |           |         |           |
| BBH | 7d00053 | um05908   | 1.00E-101 | um05908   | 7d00053 | 3.00E-88  |
| BBH | 7c00288 | um00948   | 0         | um00948   | 7c00288 | 0         |
| BBH | 7d00294 | um10586   | 0         | um10586   | 7d00294 | 0         |
| BBH | 7c00035 | um05880   | 1.00E-156 | um05880   | 7c00035 | 1.00E-157 |
| BBH | 7c00316 | um00933   | 1.00E-117 | um00933   | 7c00316 | 1.00E-131 |
| BBH | 7d00103 | um11705   | 4.00E-36  | um11705   | 7d00103 | 8.00E-41  |
| BBH | 7d00045 | um05893   | 1.00E-141 | um05893   | 7d00045 | 1.00E-141 |
| BBH | 7d00174 | um01194   | 0         | um01194   | 7d00174 | 0         |
| BBH | 7c00132 | um02401   | 7.00E-54  | um02401   | 7c00132 | 5.00E-52  |
| BBH | 7c00328 | um11842   | 1.00E-12  | um11842   | 7c00328 | 2.00E-18  |
| BBH | 7c00175 | um01177   | 0         | um01177   | 7c00175 | 0         |
| BBH | 7c00069 | um02252   | 0         | um02252   | 7c00069 | 1.00E-166 |
| BBH | 7c00106 | um02331   | 0         | um02331   | 7c00106 | 0         |
| BBH | 7d00249 | um01062   | 0         | um01062   | 7d00249 | 0         |
| BBH | 7d00317 | um00919   | 1.00E-149 | um00919   | 7d00317 | 1.00E-149 |
| NNN | 7c00297 | um00898   | 0         |           |         |           |
| BBH | 7c00352 | um00840   | 0         | um00840   | 7c00352 | 0         |
| BBH | 7c00257 | um01017   | 0         | um01017   | 7c00257 | 0         |
| BBH | 7d00283 | um00975   | 2.00E-63  | um00975   | 7d00283 | 5.00E-67  |
| BBH | 7d00145 | um01251   | 2.00E-68  | um01251   | 7d00145 | 5.00E-78  |
| BBH | 7c00344 | um00851   | 1.00E-145 | um00851   | 7c00344 | 1.00E-146 |
| BBH | 7c00313 | um10620   | 1.00E-137 | um10620   | 7c00313 | 1.00E-139 |
| BBH | 7d00341 | um00866   | 1.00E-163 | um00866   | 7d00341 | 1.00E-163 |
| BBH | 7c00233 | um11273   | 0         | um11273   | 7c00233 | 0         |
| BBH | 7c00309 | um00922   | 1.00E-162 | um00922   | 7c00309 | 1.00E-160 |
| BBH | 7d00263 | um01004   | 3.00E-32  | um01004   | 7d00263 | 7.00E-31  |
| BBH | 7d00124 | um02400   | 0         | um02400   | 7d00124 | 0         |
| BBH | 7c00199 | um01139.2 | 1.00E-79  | um01139.2 | 7c00199 | 4.00E-84  |
| BBH | 7d00189 | um01161   | 0         | um01161   | 7d00189 | 0         |
| BBH | 7c00300 | um00903   | 0         | um00903   | 7c00300 | 0         |
| BBH | 7d00320 | um00928   | 3.00E-62  | um00928   | 7d00320 | 1.00E-50  |
| BBH | 7c00153 | um01216   | 0         | um01216   | 7c00153 | 0         |
| BBH | 7d00109 | um02342   | 1.00E-124 | um02342   | 7d00109 | 1.00E-113 |
| BBH | 7d00091 | um02305   | 7.00E-48  | um02305   | 7d00091 | 1.00E-58  |
| BBH | 7d00228 | um01088   | 0         | um01088   | 7d00228 | 0         |
| BBH | 7d00196 | um11649   | 1.00E-151 | um11649   | 7d00196 | 1.00E-126 |
| BBH | 7d00008 | um05811   | 0         | um05811   | 7d00008 | 0         |
| BBH | 7c00326 | um03228   | 0         | um03228   | 7c00326 | 0         |
| BBH | 7d00278 | um10789   | 5.00E-20  | um10789   | 7d00278 | 9.00E-23  |
| BBH | 7c00076 | um02266   | 0         | um02266   | 7c00076 | 0         |
| BBH | 7d00310 | um10614   | 9.00E-98  | um10614   | 7d00310 | 1.00E-99  |
| BBH | 7d00067 | um02253   | 0         | um02253   | 7d00067 | 0         |
| BBH | 7d00137 | um15037   | 1.00E-154 | um15037   | 7d00137 | 1.00E-148 |
| BBH | 7c00261 | um01010   | 3.00E-75  | um01010   | 7c00261 | 3.00E-72  |

|     |         |           |           |           |         |           |
|-----|---------|-----------|-----------|-----------|---------|-----------|
| BBH | 7c00010 | um11192   | 4.00E-54  | um11192   | 7c00010 | 2.00E-60  |
| BBH | 7c00123 | um02360   | 6.00E-32  | um02360   | 7c00123 | 2.00E-26  |
| BBH | 7d00269 | um00998   | 6.00E-39  | um00998   | 7d00269 | 4.00E-29  |
| BBH | 7d00243 | um01033.2 | 0         | um01033.2 | 7d00243 | 0         |
| BBH | 7c00028 | um11023   | 7.00E-57  | um11023   | 7c00028 | 4.00E-60  |
| BBH | 7d00113 | um02350   | 0         | um02350   | 7d00113 | 0         |
| BBH | 7d00059 | um05916   | 0         | um05916   | 7d00059 | 0         |
| BBH | 7d00001 | um05437   | 0         | um05437   | 7d00001 | 0         |
| BBH | 7c00232 | um01064   | 1.00E-49  | um01064   | 7c00232 | 3.00E-44  |
| BBH | 7c00120 | um02356   | 0         | um02356   | 7c00120 | 0         |
| BBH | 7c00270 | um10790   | 0         | um10790   | 7c00270 | 0         |
| BBH | 7c00082 | um11401   | 0         | um11401   | 7c00082 | 0         |
| BBH | 7d00099 | um02321   | 0         | um02321   | 7d00099 | 0         |
| BBH | 7d00242 | um01030   | 2.00E-56  | um01030   | 7d00242 | 1.00E-54  |
| BBH | 7d00049 | um05901   | 6.00E-99  | um05901   | 7d00049 | 1.00E-104 |
| BBH | 7c00111 | um11709   | 2.00E-34  | um11709   | 7c00111 | 3.00E-44  |
| BBH | 7c00168 | um01184   | 1.00E-60  | um01184   | 7c00168 | 6.00E-65  |
| BBH | 7d00252 | um01055   | 0         | um01055   | 7d00252 | 0         |
| BBH | 7c00115 | um02347   | 0         | um02347   | 7c00115 | 0         |
| BBH | 7c00015 | um05827   | 0         | um05827   | 7c00015 | 0         |
| BBH | 7c00207 | um01116   | 0         | um01116   | 7c00207 | 0         |
| NNN | 7c00229 | um01076   | 1.00E-131 |           |         |           |
| BBH | 7c00054 | um05919   | 1.00E-177 | um05919   | 7c00054 | 1.00E-178 |
| BBH | 7c00037 | um11036   | 0         | um11036   | 7c00037 | 0         |
| BBH | 7c00185 | um01171   | 0         | um01171   | 7c00185 | 0         |
| BBH | 7d00183 | um01172   | 0         | um01172   | 7d00183 | 0         |
| BBH | 7c00001 | um05800   | 0         | um05800   | 7c00001 | 0         |
| BBH | 7d00295 | um00955   | 0         | um00955   | 7d00295 | 0         |
| BBH | 7d00282 | um11849   | 3.00E-39  | um11849   | 7d00282 | 4.00E-39  |
| BBH | 7c00133 | um10144   | 1.00E-118 | um10144   | 7c00133 | 1.00E-109 |
| BBH | 7c00055 | um11802   | 7.00E-41  | um11802   | 7c00055 | 6.00E-40  |
| BBH | 7c00062 | um02244   | 0         | um02244   | 7c00062 | 0         |
| BBH | 7d00204 | um01133   | 0         | um01133   | 7d00204 | 0         |
| BBH | 7d00052 | um05907   | 1.00E-160 | um05907   | 7d00052 | 1.00E-161 |
| BBH | 7c00016 | um05828   | 0         | um05828   | 7c00016 | 0         |
| BBH | 7c00345 | um11253   | 1.00E-125 | um11253   | 7c00345 | 1.00E-147 |
| BBH | 7d00173 | um01195   | 0         | um01195   | 7d00173 | 0         |
| BBH | 7c00256 | um01018   | 1.00E-67  | um01018   | 7c00256 | 2.00E-67  |
| BBH | 7d00017 | um05830   | 1.00E-35  | um05830   | 7d00017 | 2.00E-38  |
| BBH | 7c00041 | um05894   | 1.00E-88  | um05894   | 7c00041 | 5.00E-88  |
| BBH | 7c00312 | um00924   | 1.00E-164 | um00924   | 7c00312 | 1.00E-165 |
| BBH | 7c00283 | um10590.2 | 1.00E-110 | um10590.2 | 7c00283 | 1.00E-104 |
| BBH | 7d00236 | um01070   | 0         | um01070   | 7d00236 | 0         |
| BBH | 7d00271 | um00989   | 0         | um00989   | 7d00271 | 0         |
| BBH | 7c00137 | um10142   | 1.00E-111 | um10142   | 7c00137 | 1.00E-111 |
| BBH | 7d00094 | um02301   | 1.00E-163 | um02301   | 7d00094 | 1.00E-164 |
| BBH | 7c00099 | um11701   | 1.00E-114 | um11701   | 7c00099 | 1.00E-101 |
| BBH | 7d00331 | um00882   | 1.00E-174 | um00882   | 7d00331 | 1.00E-175 |
| BBH | 7c00301 | um00904   | 0         | um00904   | 7c00301 | 0         |
| BBH | 7c00308 | um00913   | 0         | um00913   | 7c00308 | 0         |
| BBH | 7c00112 | um02337   | 0         | um02337   | 7c00112 | 0         |
| BBH | 7c00279 | um11846   | 0         | um11846   | 7c00279 | 0         |
| BBH | 7d00132 | um02413   | 4.00E-70  | um02413   | 7d00132 | 1.00E-71  |
| BBH | 7d00356 | um00836   | 0         | um00836   | 7d00356 | 0         |
| BBH | 7d00227 | um01090   | 0         | um01090   | 7d00227 | 0         |
| BBH | 7c00148 | um01244   | 0         | um01244   | 7c00148 | 0         |
| BBH | 7c00198 | um11643   | 2.00E-62  | um11643   | 7c00198 | 6.00E-65  |
| BBH | 7d00026 | um05848   | 1.00E-102 | um05848   | 7d00026 | 1.00E-105 |
| BBH | 7d00023 | um05840   | 0         | um05840   | 7d00023 | 0         |
| BBH | 7d00262 | um10796   | 0         | um10796   | 7d00262 | 0         |
| BBH | 7d00063 | um12101   | 2.00E-32  | um12101   | 7d00063 | 9.00E-33  |
| BBH | 7c00329 | um11840   | 1.00E-129 | um11840   | 7c00329 | 1.00E-124 |

|     |         |           |           |           |          |           |
|-----|---------|-----------|-----------|-----------|----------|-----------|
| BBH | 7d00039 | um11026   | 0         | um11026   | 7d00039  | 0         |
| BBH | 7c00067 | um10082   | 7.00E-93  | um10082   | 7c00067  | 2.00E-93  |
| BBH | 7d00318 | um00930   | 0         | um00930   | 7d00318  | 0         |
| BBH | 7d00153 | um01232   | 0         | um01232   | 7d00153  | 0         |
| BBH | 7c00353 | um11245   | 1.00E-171 | um11245   | 7c00353  | 0         |
| NNN | 7d00144 | um01252   | 0         |           |          |           |
| BBH | 7c00191 | um01150   | 1.00E-26  | um01150   | 7c00191  | 1.00E-26  |
| BBH | 7c00244 | um01042   | 0         | um01042   | 7c00244  | 0         |
| BBH | 7c00299 | um00902   | 0         | um00902   | 7c00299  | 0         |
| NNN | 7c00098 | um12186   | 0         |           |          |           |
| BBH | 7d00342 | um00864   | 1.00E-143 | um00864   | 7d00342  | 1.00E-138 |
| BBH | 7c00208 | um01117   | 1.00E-102 | um01117   | 7c00208  | 1.00E-103 |
| BBH | 7c00177 | um01173   | 1.00E-133 | um01173   | 7c00177  | 1.00E-138 |
| BBH | 7d00302 | um10625   | 9.00E-50  | um10625   | 7d00302  | 3.00E-52  |
| BBH | 7c00045 | um05898.2 | 1.00E-152 | um05898.2 | 7c00045  | 1.00E-145 |
| BBH | 7c00122 | um10129   | 0         | um10129   | 7c00122  | 0         |
| BBH | 7c00027 | um11021   | 0         | um11021   | 7c00027  | 0         |
| BBH | 7c00339 | um11259   | 2.00E-36  | um11259   | 7c00339  | 3.00E-38  |
| BBH | 7d00209 | um01123   | 0         | um01123   | 7d00209  | 0         |
| BBH | 7d00161 | um01215   | 0         | um01215   | 7d00161  | 0         |
| BBH | 7c00226 | um01080   | 0         | um01080   | 7c00226  | 0         |
| BBH | 7d00231 | um01082   | 4.00E-86  | um01082   | 7d00231  | 2.00E-79  |
| NNN | 7d00148 | um01245   | 6.00E-68  | um01245   | 16c00084 | 5.00E-72  |
| BBH | 7d00046 | um05895   | 1.00E-109 | um05895   | 7d00046  | 1.00E-119 |
| BBH | 7c00022 | um05839   | 0         | um05839   | 7c00022  | 0         |
| BBH | 7c00275 | um00984   | 1.00E-178 | um00984   | 7c00275  | 1.00E-179 |
| BBH | 7c00018 | um05831   | 0         | um05831   | 7c00018  | 0         |
| BBH | 7c00036 | um11035   | 0         | um11035   | 7c00036  | 0         |
| BBH | 7c00184 | um01170   | 0         | um01170   | 7c00184  | 1.00E-178 |
| BBH | 7d00116 | um02358   | 1.00E-139 | um02358   | 7d00116  | 1.00E-123 |
| BBH | 7d00118 | um10132   | 9.00E-22  | um10132   | 7d00118  | 5.00E-19  |
| BBH | 7c00051 | um11797   | 0         | um11797   | 7c00051  | 0         |
| BBH | 7c00248 | um11272   | 3.00E-94  | um11272   | 7c00248  | 3.00E-98  |
| BBH | 7d00264 | um10794   | 0         | um10794   | 7d00264  | 0         |
| BBH | 7c00262 | um01009   | 0         | um01009   | 7c00262  | 0         |
| NNN | 7d00100 | um02324   | 5.00E-72  |           |          |           |
| BBH | 7d00064 | um02243   | 2.00E-76  | um02243   | 7d00064  | 2.00E-80  |
| BBH | 7d00028 | um05850   | 1.00E-176 | um05850   | 7d00028  | 1.00E-180 |
| BBH | 7d00237 | um01063   | 3.00E-97  | um01063   | 7d00237  | 2.00E-98  |
| BBH | 7c00170 | um01181   | 1.00E-179 | um01181   | 7c00170  | 0         |
| BBH | 7d00136 | um10225   | 3.00E-49  | um10225   | 7d00136  | 6.00E-43  |
| BBH | 7c00077 | um02268   | 1.00E-141 | um02268   | 7c00077  | 1.00E-144 |
| BBH | 7d00198 | um01149   | 0         | um01149   | 7d00198  | 0         |
| BBH | 7d00195 | um01152   | 0         | um01152   | 7d00195  | 0         |
| BBH | 7d00210 | um01120   | 0         | um01120   | 7d00210  | 0         |
| BBH | 7c00165 | um01191   | 0         | um01191   | 7c00165  | 0         |
| BBH | 7d00287 | um00966   | 0         | um00966   | 7d00287  | 0         |
| BBH | 7d00324 | um00891   | 1.00E-174 | um00891   | 7d00324  | 0         |
| BBH | 7c00282 | um12122   | 3.00E-42  | um12122   | 7c00282  | 2.00E-48  |
| BBH | 7c00097 | um02303   | 7.00E-79  | um02303   | 7c00097  | 8.00E-82  |
| BBH | 7d00141 | um11866   | 1.00E-173 | um11866   | 7d00141  | 0         |
| BBH | 7d00131 | um02371   | 1.00E-171 | um02371   | 7d00131  | 1.00E-178 |
| BBH | 7d00035 | um05861   | 0         | um05861   | 7d00035  | 0         |
| BBH | 7d00147 | um15035   | 4.00E-96  | um15035   | 7d00147  | 1.00E-104 |
| BBH | 7d00354 | um12113   | 6.00E-42  | um12113   | 7d00354  | 7.00E-42  |
| NNN | 7c00302 | um10615   | 8.00E-87  |           |          |           |
| BBH | 7d00188 | um01169   | 0         | um01169   | 7d00188  | 0         |
| BBH | 7d00125 | um02398   | 0         | um02398   | 7d00125  | 0         |
| BBH | 7c00156 | um10594   | 0         | um10594   | 7c00156  | 0         |
| BBH | 7c00163 | um01197   | 0         | um01197   | 7c00163  | 0         |
| BBH | 7c00231 | um01072   | 1.00E-160 | um01072   | 7c00231  | 1.00E-154 |
| BBH | 7c00212 | um11282.2 | 0         | um11282.2 | 7c00212  | 0         |

|     |         |           |           |           |         |           |
|-----|---------|-----------|-----------|-----------|---------|-----------|
| BBH | 7d00265 | um10793   | 1.00E-59  | um10793   | 7d00265 | 1.00E-59  |
| BBH | 7c00149 | um01243   | 7.00E-94  | um01243   | 7c00149 | 8.00E-94  |
| NNN | 7c00291 | um00940   | 7.00E-23  |           |         |           |
| BBH | 7d00018 | um05832   | 6.00E-37  | um05832   | 7d00018 | 9.00E-40  |
| BBH | 7d00038 | um11024   | 3.00E-23  | um11024   | 7d00038 | 1.00E-23  |
| NNN | 7c00176 | um01175   | 0         |           |         |           |
| BBH | 7c00138 | um10141   | 5.00E-85  | um10141   | 7c00138 | 5.00E-89  |
| BBH | 7c00298 | um10613   | 1.00E-163 | um10613   | 7c00298 | 1.00E-162 |
| BBH | 7c00030 | um05870   | 1.00E-139 | um05870   | 7c00030 | 1.00E-122 |
| BBH | 7d00332 | um11841   | 1.00E-110 | um11841   | 7d00332 | 1.00E-104 |
| BBH | 7d00164 | um01210   | 1.00E-77  | um01210   | 7d00164 | 1.00E-73  |
| BBH | 7c00239 | um15057   | 0         | um15057   | 7c00239 | 0         |
| BBH | 7d00004 | um05805.2 | 1.00E-134 | um05805.2 | 7d00004 | 1.00E-135 |
| BBH | 7c00314 | um10621   | 7.00E-57  | um10621   | 7c00314 | 7.00E-57  |
| BBH | 7d00296 | um00952   | 1.00E-109 | um00952   | 7d00296 | 1.00E-107 |
| BBH | 7d00176 | um01190   | 0         | um01190   | 7d00176 | 0         |
| BBH | 7d00156 | um01220.2 | 0         | um01220.2 | 7d00156 | 0         |
| BBH | 7d00207 | um01130   | 1.00E-126 | um01130   | 7d00207 | 1.00E-125 |
| BBH | 7d00074 | um11398   | 0         | um11398   | 7d00074 | 0         |
| BBH | 7c00225 | um01081   | 1.00E-118 | um01081   | 7c00225 | 1.00E-118 |
| BBH | 7c00134 | um02397   | 1.00E-107 | um02397   | 7c00134 | 1.00E-134 |
| BBH | 7c00142 | um01264   | 0         | um01264   | 7c00142 | 0         |
| BBH | 7d00172 | um01196   | 0         | um01196   | 7d00172 | 0         |
| BBH | 7d00177 | um11302   | 4.00E-80  | um11302   | 7d00177 | 5.00E-76  |
| BBH | 7d00162 | um01213   | 6.00E-36  | um01213   | 7d00162 | 8.00E-39  |
| BBH | 7d00169 | um01204   | 2.00E-49  | um01204   | 7d00169 | 1.00E-50  |
| BBH | 7d00230 | um01084   | 0         | um01084   | 7d00230 | 0         |
| BBH | 7d00285 | um15034   | 0         | um15034   | 7d00285 | 0         |
| BBH | 7c00105 | um11707   | 0         | um11707   | 7c00105 | 0         |
| BBH | 7d00254 | um01054   | 0         | um01054   | 7d00254 | 0         |
| BBH | 7d00158 | um01224   | 2.00E-56  | um01224   | 7d00158 | 5.00E-55  |
| BBH | 7d00325 | um00890   | 1.00E-129 | um00890   | 7d00325 | 1.00E-130 |
| BBH | 7d00338 | um11263   | 1.00E-155 | um11263   | 7d00338 | 1.00E-160 |
| BBH | 7c00272 | um10792   | 1.00E-128 | um10792   | 7c00272 | 1.00E-128 |
| BBH | 7d00143 | um01257   | 1.00E-158 | um01257   | 7d00143 | 1.00E-158 |
| BBH | 7c00311 | um00931   | 2.00E-45  | um00931   | 7c00311 | 6.00E-50  |
| NNN | 7d00047 | um05897   | 0         |           |         |           |
| NNN | 7c00178 | um01162   | 4.00E-31  | um01162   | 7c00179 | 0         |
| BBH | 7d00201 | um01141   | 0         | um01141   | 7d00201 | 0         |
| BBH | 7c00003 | um05802   | 0         | um05802   | 7c00003 | 0         |
| BBH | 7c00268 | um01001   | 0         | um01001   | 7c00268 | 0         |
| BBH | 7c00017 | um05829   | 2.00E-42  | um05829   | 7c00017 | 9.00E-43  |
| BBH | 7d00208 | um01129.2 | 0         | um01129.2 | 7d00208 | 0         |
| BBH | 7c00113 | um02341   | 0         | um02341   | 7c00113 | 0         |
| BBH | 7c00209 | um01113   | 1.00E-118 | um01113   | 7c00209 | 1.00E-118 |
| BBH | 7d00244 | um11266   | 0         | um11266   | 7d00244 | 0         |
| BBH | 7c00048 | um05906   | 0         | um05906   | 7c00048 | 0         |
| BBH | 7d00297 | um12121   | 2.00E-54  | um12121   | 7d00297 | 9.00E-53  |
| BBH | 7c00155 | um01221   | 0         | um01221   | 7c00155 | 0         |
| BBH | 7c00078 | um11399   | 0         | um11399   | 7c00078 | 0         |
| BBH | 7d00065 | um02246   | 1.00E-131 | um02246   | 7d00065 | 1.00E-129 |
| BBH | 7c00317 | um00923   | 6.00E-94  | um00923   | 7c00317 | 1.00E-123 |
| BBH | 7d00093 | um11918   | 4.00E-67  | um11918   | 7d00093 | 1.00E-121 |
| BBH | 7d00027 | um05849   | 0         | um05849   | 7d00027 | 0         |
| BBH | 7c00060 | um10080   | 1.00E-128 | um10080   | 7c00060 | 1.00E-134 |
| BBH | 7c00094 | um02311   | 1.00E-107 | um02311   | 7c00094 | 2.00E-95  |
| BBH | 7d00197 | um11648   | 1.00E-82  | um11648   | 7d00197 | 9.00E-82  |
| BBH | 7c00171 | um01180   | 0         | um01180   | 7c00171 | 0         |
| BBH | 7c00253 | um01023   | 1.00E-147 | um01023   | 7c00253 | 1.00E-147 |
| BBH | 7d00060 | um11800   | 0         | um11800   | 7d00060 | 0         |
| BBH | 7d00057 | um11798   | 1.00E-127 | um11798   | 7d00057 | 1.00E-122 |
| BBH | 7d00212 | um11858   | 1.00E-177 | um11858   | 7d00212 | 1.00E-177 |

|     |         |           |           |           |         |           |
|-----|---------|-----------|-----------|-----------|---------|-----------|
| BBH | 7c00285 | um00958   | 0         | um00958   | 7c00285 | 0         |
| BBH | 7c00247 | um01051   | 0         | um01051   | 7c00247 | 0         |
| BBH | 7c00200 | um11642   | 0         | um11642   | 7c00200 | 0         |
| BBH | 7d00117 | um02361   | 3.00E-27  | um02361   | 7d00117 | 3.00E-27  |
| BBH | 7d00115 | um10128   | 9.00E-39  | um10128   | 7d00115 | 3.00E-38  |
| BBH | 7c00021 | um11195   | 0         | um11195   | 7c00021 | 0         |
| BBH | 7d00003 | um05803   | 1.00E-179 | um05803   | 7d00003 | 0         |
| BBH | 7c00230 | um01074   | 1.00E-115 | um01074   | 7c00230 | 1.00E-142 |
| BBH | 7d00061 | um11801   | 9.00E-14  | um11801   | 7d00061 | 6.00E-14  |
| BBH | 7c00093 | um02314   | 4.00E-37  | um02314   | 7c00093 | 4.00E-33  |
| BBH | 7c00246 | um11270   | 0         | um11270   | 7c00246 | 0         |
| BBH | 7c00303 | um00906.2 | 2.00E-45  | um00906.2 | 7c00303 | 3.00E-45  |
| BBH | 7d00126 | um02395   | 0         | um02395   | 7d00126 | 0         |
| BBH | 7d00187 | um01167   | 1.00E-148 | um01167   | 7d00187 | 1.00E-151 |
| BBH | 7c00214 | um01103   | 4.00E-55  | um01103   | 7c00214 | 1.00E-59  |
| BBH | 7c00166 | um01189   | 2.00E-73  | um01189   | 7c00166 | 4.00E-72  |
| BBH | 7c00238 | um11851   | 4.00E-70  | um11851   | 7c00238 | 2.00E-70  |
| NNN | 7c00213 | um01105   | 0         |           |         |           |
| BBH | 7d00211 | um15060   | 7.00E-84  | um15060   | 7d00211 | 6.00E-90  |
| BBH | 7d00316 | um12117   | 1.00E-25  | um12117   | 7d00316 | 3.00E-21  |
| BBH | 7c00254 | um01021   | 6.00E-45  | um01021   | 7c00254 | 4.00E-46  |
| BBH | 7d00340 | um00867   | 3.00E-44  | um00867   | 7d00340 | 1.00E-44  |
| BBH | 7d00142 | um01258   | 0         | um01258   | 7d00142 | 0         |
| BBH | 7c00127 | um10134   | 9.00E-93  | um10134   | 7c00127 | 4.00E-98  |
| BBH | 7d00019 | um05834   | 0         | um05834   | 7d00019 | 0         |
| BBH | 7d00083 | um02289   | 0         | um02289   | 7d00083 | 0         |
| BBH | 7d00034 | um05860   | 1.00E-132 | um05860   | 7d00034 | 1.00E-132 |
| BBH | 7c00192 | um11645   | 3.00E-57  | um11645   | 7c00192 | 3.00E-57  |
| BBH | 7c00320 | um00937   | 8.00E-49  | um00937   | 7c00320 | 8.00E-44  |
| BBH | 7c00183 | um01168   | 0         | um01168   | 7c00183 | 0         |
| BBH | 7d00175 | um01192   | 0         | um01192   | 7d00175 | 0         |
| NNN | 7d00155 | um01219   | 3.00E-33  |           |         |           |
| BBH | 7d00206 | um01131   | 0         | um01131   | 7d00206 | 0         |
| BBH | 7c00338 | um11260   | 0         | um11260   | 7c00338 | 0         |
| BBH | 7c00333 | um10565   | 7.00E-70  | um10565   | 7c00333 | 2.00E-69  |
| BBH | 7d00071 | um02263   | 8.00E-71  | um02263   | 7d00071 | 1.00E-70  |
| BBH | 7c00135 | um02396   | 1.00E-89  | um02396   | 7c00135 | 4.00E-80  |
| BBH | 7d00273 | um00986   | 1.00E-101 | um00986   | 7d00273 | 1.00E-100 |
| BBH | 7d00171 | um01198   | 4.00E-98  | um01198   | 7d00171 | 3.00E-97  |
| BBH | 7c00143 | um11867   | 0         | um11867   | 7c00143 | 0         |
| BBH | 7c00310 | um00916   | 1.00E-139 | um00916   | 7c00310 | 1.00E-155 |
| BBH | 7d00078 | um11400   | 1.00E-165 | um11400   | 7d00078 | 1.00E-165 |
| NNN | 7c00343 | um11256   | 0         |           |         |           |
| BBH | 7c00118 | um10127   | 2.00E-74  | um10127   | 7c00118 | 3.00E-74  |
| BBH | 7d00238 | um01067   | 0         | um01067   | 7d00238 | 0         |
| BBH | 7c00052 | um11799   | 8.00E-98  | um11799   | 7c00052 | 1.00E-101 |
| BBH | 7d00079 | um02280   | 0         | um02280   | 7d00079 | 0         |
| NNN | 7c00047 | um11038   | 1.00E-101 |           |         |           |
| BBH | 7c00125 | um02365   | 1.00E-143 | um02365   | 7c00125 | 1.00E-161 |
| BBH | 7d00040 | um11028   | 1.00E-175 | um11028   | 7d00040 | 1.00E-177 |
| BBH | 7d00284 | um12123   | 1.00E-160 | um12123   | 7d00284 | 1.00E-146 |
| BBH | 7d00058 | um05915   | 1.00E-172 | um05915   | 7d00058 | 0         |
| BBH | 7c00139 | um10138   | 1.00E-144 | um10138   | 7c00139 | 1.00E-151 |
| BBH | 7c00058 | um05922   | 0         | um05922   | 7c00058 | 0         |
| BBH | 7d00200 | um01144   | 1.00E-108 | um01144   | 7d00200 | 1.00E-111 |
| BBH | 7d00275 | um00980   | 2.00E-80  | um00980   | 7d00275 | 5.00E-82  |
| BBH | 7d00007 | um05809   | 0         | um05809   | 7d00007 | 0         |
| BBH | 7c00141 | um01266   | 1.00E-140 | um01266   | 7c00141 | 1.00E-157 |
| BBH | 7d00298 | um00950   | 0         | um00950   | 7d00298 | 0         |
| BBH | 7d00077 | um02275   | 0         | um02275   | 7d00077 | 0         |
| BBH | 7c00341 | um11258   | 2.00E-24  | um11258   | 7c00341 | 1.00E-25  |
| NNN | 7c00332 | um00876   | 0         |           |         |           |

|     |         |         |           |         |         |           |
|-----|---------|---------|-----------|---------|---------|-----------|
| BBH | 7d00257 | um01022 | 5.00E-65  | um01022 | 7d00257 | 6.00E-67  |
| BBH | 7c00065 | um02247 | 0         | um02247 | 7c00065 | 0         |
| BBH | 7c00124 | um10130 | 0         | um10130 | 7c00124 | 0         |
| BBH | 7d00037 | um11022 | 1.00E-168 | um11022 | 7d00037 | 1.00E-158 |
| BBH | 7c00237 | um11853 | 0         | um11853 | 7c00237 | 0         |
| NNN | 7c00284 | um10589 | 0         |         |         |           |
| BBH | 7c00096 | um11919 | 0         | um11919 | 7c00096 | 0         |
| BBH | 7c00086 | um11402 | 4.00E-91  | um11402 | 7c00086 | 4.00E-86  |
| NNN | 7d00072 | um02264 | 1.00E-14  |         |         |           |
| BBH | 7c00039 | um05890 | 1.00E-88  | um05890 | 7c00039 | 4.00E-88  |
| BBH | 7c00159 | um01211 | 1.00E-135 | um01211 | 7c00159 | 1.00E-132 |
| BBH | 7c00337 | um11261 | 2.00E-71  | um11261 | 7c00337 | 1.00E-71  |
| BBH | 7d00266 | um10791 | 1.00E-154 | um10791 | 7d00266 | 1.00E-142 |
| BBH | 7d00179 | um01185 | 1.00E-35  | um01185 | 7d00179 | 6.00E-45  |
| BBH | 7d00012 | um05820 | 0         | um05820 | 7d00012 | 0         |
| BBH | 7d00289 | um10588 | 0         | um10588 | 7d00289 | 0         |
| BBH | 7c00179 | um01162 | 0         | um01162 | 7c00179 | 0         |
| BBH | 7c00126 | um02367 | 1.00E-171 | um02367 | 7c00126 | 0         |
| BBH | 7c00057 | um05921 | 0         | um05921 | 7c00057 | 0         |
| BBH | 7c00029 | um11025 | 0         | um11025 | 7c00029 | 0         |
| NNN | 7c00201 | um01128 | 1.00E-116 |         |         |           |
| BBH | 7d00345 | um00859 | 5.00E-49  | um00859 | 7d00345 | 3.00E-59  |
| BBH | 7d00166 | um01206 | 0         | um01206 | 7d00166 | 0         |
| BBH | 7d00186 | um01165 | 0         | um01165 | 7d00186 | 0         |
| BBH | 7d00245 | um11268 | 0         | um11268 | 7d00245 | 0         |
| BBH | 7c00161 | um01207 | 1.00E-131 | um01207 | 7c00161 | 1.00E-116 |
| BBH | 7d00157 | um01222 | 0         | um01222 | 7d00157 | 0         |
| BBH | 7c00293 | um12118 | 8.00E-18  | um12118 | 7c00293 | 2.00E-25  |
| BBH | 7c00215 | um01102 | 0         | um01102 | 7c00215 | 0         |
| BBH | 7c00252 | um01049 | 0         | um01049 | 7c00252 | 0         |
| BBH | 7c00241 | um11265 | 0         | um11265 | 7c00241 | 0         |
| BBH | 7d00127 | um10143 | 1.00E-116 | um10143 | 7d00127 | 1.00E-116 |
| BBH | 7d00329 | um00884 | 0         | um00884 | 7d00329 | 0         |
| BBH | 7c00024 | um11019 | 1.00E-103 | um11019 | 7c00024 | 1.00E-105 |
| BBH | 7d00246 | um11269 | 8.00E-94  | um11269 | 7d00246 | 1.00E-90  |
| BBH | 7c00264 | um01008 | 0         | um01008 | 7c00264 | 0         |
| BBH | 7d00135 | um01269 | 0         | um01269 | 7d00135 | 0         |
| BBH | 7d00219 | um01107 | 0         | um01107 | 7d00219 | 0         |
| BBH | 7d00313 | um00912 | 1.00E-136 | um00912 | 7d00313 | 1.00E-138 |
| BBH | 7c00182 | um01166 | 0         | um01166 | 7c00182 | 0         |
| BBH | 7c00274 | um00987 | 0         | um00987 | 7c00274 | 0         |
| BBH | 7d00119 | um02366 | 1.00E-26  | um02366 | 7d00119 | 1.00E-34  |
| BBH | 7d00106 | um02338 | 1.00E-108 | um02338 | 7d00106 | 1.00E-102 |
| BBH | 7d00041 | um05876 | 1.00E-132 | um05876 | 7d00041 | 1.00E-163 |
| BBH | 7c00034 | um05879 | 0         | um05879 | 7c00034 | 0         |
| BBH | 7d00150 | um01241 | 2.00E-20  | um01241 | 7d00150 | 8.00E-24  |
| BBH | 7c00223 | um01085 | 0         | um01085 | 7c00223 | 0         |
| BBH | 7d00239 | um01025 | 1.00E-144 | um01025 | 7d00239 | 1.00E-147 |
| BBH | 7d00084 | um02291 | 0         | um02291 | 7d00084 | 0         |
| BBH | 7c00354 | um01439 | 0         | um01439 | 7c00354 | 0         |
| BBH | 7c00012 | um05821 | 2.00E-92  | um05821 | 7c00012 | 4.00E-93  |
| BBH | 7d00190 | um01159 | 1.00E-122 | um01159 | 7d00190 | 1.00E-129 |
| BBH | 7c00085 | um02281 | 0         | um02281 | 7c00085 | 0         |
| BBH | 7c00009 | um05812 | 0         | um05812 | 7c00009 | 0         |
| BBH | 7c00095 | um02310 | 4.00E-48  | um02310 | 7c00095 | 3.00E-46  |
| BBH | 7c00006 | um05807 | 0         | um05807 | 7c00006 | 0         |
| BBH | 7c00202 | um12127 | 1.00E-45  | um12127 | 7c00202 | 7.00E-41  |
| BBH | 7d00330 | um00883 | 1.00E-152 | um00883 | 7d00330 | 1.00E-144 |
| BBH | 7c00129 | um10145 | 0         | um10145 | 7c00129 | 1.00E-160 |
| BBH | 7d00129 | um02390 | 0         | um02390 | 7d00129 | 0         |
| BBH | 7d00301 | um00946 | 1.00E-141 | um00946 | 7d00301 | 1.00E-149 |
| BBH | 7d00224 | um11278 | 1.00E-104 | um11278 | 7d00224 | 1.00E-104 |

|     |         |           |           |           |         |           |
|-----|---------|-----------|-----------|-----------|---------|-----------|
| BBH | 7c00119 | um02354   | 4.00E-58  | um02354   | 7c00119 | 3.00E-58  |
| BBH | 7d00335 | um00880   | 0         | um00880   | 7d00335 | 0         |
| BBH | 7d00089 | um12185   | 0         | um12185   | 7d00089 | 0         |
| BBH | 7c00145 | um11865   | 3.00E-91  | um11865   | 7c00145 | 3.00E-95  |
| BBH | 7d00036 | um05863   | 2.00E-38  | um05863   | 7d00036 | 2.00E-38  |
| BBH | 7c00342 | um11257.2 | 2.00E-68  | um11257.2 | 7c00342 | 2.00E-68  |
| BBH | 7c00331 | um00878   | 6.00E-55  | um00878   | 7c00331 | 1.00E-50  |
| BBH | 7c00087 | um02284   | 0         | um02284   | 7c00087 | 0         |
| BBH | 7c00224 | um01083   | 0         | um01083   | 7c00224 | 0         |
| BBH | 7c00322 | um15053   | 0         | um15053   | 7c00322 | 0         |
| BBH | 7d00256 | um11275   | 0         | um11275   | 7d00256 | 0         |
| BBH | 7d00185 | um01164   | 3.00E-12  | um01164   | 7d00185 | 4.00E-12  |
| BBH | 7c00295 | um00894   | 0         | um00894   | 7c00295 | 0         |
| BBH | 7d00233 | um01077.2 | 1.00E-107 | um01077.2 | 7d00233 | 1.00E-116 |
| BBH | 7d00178 | um01187   | 1.00E-105 | um01187   | 7d00178 | 1.00E-107 |
| BBH | 7c00079 | um02273   | 1.00E-92  | um02273   | 7c00079 | 1.00E-102 |
| BBH | 7c00251 | um01050   | 0         | um01050   | 7c00251 | 0         |
| BBH | 7c00059 | um10079   | 0         | um10079   | 7c00059 | 0         |
| BBH | 7c00336 | um00869   | 1.00E-116 | um00869   | 7c00336 | 1.00E-115 |
| BBH | 7d00068 | um02255   | 0         | um02255   | 7d00068 | 0         |
| BBH | 7c00140 | um01267   | 1.00E-146 | um01267   | 7c00140 | 1.00E-136 |
| BBH | 7d00359 | um05248   | 0         | um05248   | 7d00359 | 0         |
| BBH | 7c00050 | um15085   | 0         | um15085   | 7c00050 | 0         |
| BBH | 7d00042 | um05878   | 1.00E-53  | um05878   | 7d00042 | 3.00E-46  |
| BBH | 7d00006 | um05806   | 0         | um05806   | 7d00006 | 0         |
| NNN | 7d00096 | um02318.2 | 0         |           |         |           |
| BBH | 7d00274 | um00985   | 5.00E-86  | um00985   | 7d00274 | 6.00E-84  |
| BBH | 7c00249 | um01059   | 1.00E-148 | um01059   | 7c00249 | 1.00E-149 |
| BBH | 7d00221 | um01100   | 1.00E-24  | um01100   | 7d00221 | 1.00E-24  |
| NNN | 7c00103 | um02327   | 1.00E-168 |           |         |           |
| BBH | 7c00193 | um01146   | 1.00E-128 | um01146   | 7c00193 | 1.00E-128 |
| BBH | 7d00020 | um05835   | 0         | um05835   | 7d00020 | 0         |
| BBH | 7d00322 | um00935   | 0         | um00935   | 7d00322 | 0         |
| BBH | 7c00162 | um11304   | 1.00E-174 | um11304   | 7c00162 | 1.00E-164 |
| BBH | 7c00064 | um02245   | 1.00E-133 | um02245   | 7c00064 | 1.00E-130 |
| BBH | 7c00216 | um01099   | 1.00E-153 | um01099   | 7c00216 | 1.00E-154 |
| BBH | 7c00240 | um01031   | 4.00E-86  | um01031   | 7c00240 | 3.00E-91  |
| BBH | 7c00071 | um02256   | 0         | um02256   | 7c00071 | 0         |
| BBH | 7d00128 | um02392   | 1.00E-159 | um02392   | 7d00128 | 1.00E-167 |
| NNN | 7d00352 | um10068   | 1.00E-71  | um10068   | 6d00063 | 0         |
| BBH | 7d00288 | um00965   | 0         | um00965   | 7d00288 | 0         |
| BBH | 7d00203 | um01134   | 0         | um01134   | 7d00203 | 0         |
| BBH | 7d00070 | um02262   | 0         | um02262   | 7d00070 | 0         |
| BBH | 7d00323 | um00936   | 0         | um00936   | 7d00323 | 0         |
| BBH | 7c00046 | um05900   | 0         | um05900   | 7c00046 | 0         |
| BBH | 7c00130 | um02404   | 1.00E-134 | um02404   | 7c00130 | 1.00E-133 |
| BBH | 7d00013 | um05822   | 0         | um05822   | 7d00013 | 0         |
| BBH | 7c00092 | um02300   | 0         | um02300   | 7c00092 | 0         |
| BBH | 7d00110 | um02343   | 0         | um02343   | 7d00110 | 0         |
| BBH | 7d00033 | um05858   | 0         | um05858   | 7d00033 | 0         |
| BBH | 7c00158 | um01229   | 0         | um01229   | 7c00158 | 0         |
| BBH | 7d00346 | um00857   | 0         | um00857   | 7d00346 | 0         |
| BBH | 7d00299 | um00949   | 0         | um00949   | 7d00299 | 0         |
| NNN | 7d00102 | um11703.2 | 0         |           |         |           |
| BBH | 7c00033 | um11027   | 1.00E-109 | um11027   | 7c00033 | 1.00E-109 |
| BBH | 7d00347 | um00855   | 0         | um00855   | 7d00347 | 0         |
| BBH | 7c00157 | um10595   | 0         | um10595   | 7c00157 | 0         |
| BBH | 7d00314 | um00921   | 0         | um00921   | 7d00314 | 0         |
| BBH | 7c00265 | um01006   | 4.00E-55  | um01006   | 7c00265 | 5.00E-62  |
| BBH | 7d00220 | um01104   | 1.00E-114 | um01104   | 7d00220 | 1.00E-114 |
| BBH | 7d00163 | um01212   | 0         | um01212   | 7d00163 | 0         |
| BBH | 7c00104 | um11706   | 5.00E-27  | um11706   | 7c00104 | 1.00E-26  |



|     |         |           |           |           |         |           |
|-----|---------|-----------|-----------|-----------|---------|-----------|
| BBH | 7d00029 | um05853   | 0         | um05853   | 7d00029 | 0         |
| BBH | 7c00355 | um00837   | 0         | um00837   | 7c00355 | 0         |
| BBH | 7c00072 | um02258   | 0         | um02258   | 7c00072 | 0         |
| BBH | 7c00116 | um10126   | 4.00E-91  | um10126   | 7c00116 | 3.00E-91  |
| BBH | 7d00149 | um01242   | 0         | um01242   | 7d00149 | 0         |
| BBH | 7c00023 | um05847   | 0         | um05847   | 7c00023 | 0         |
| BBH | 7c00172 | um01179   | 8.00E-48  | um01179   | 7c00172 | 4.00E-63  |
| BBH | 7d00105 | um02336   | 3.00E-80  | um02336   | 7d00105 | 3.00E-89  |
| BBH | 7c00362 | um10545   | 1.00E-131 | um10545   | 7c00362 | 1.00E-132 |
| BBH | 7d00353 | um11247   | 2.00E-70  | um11247   | 7d00353 | 2.00E-65  |
| BBH | 7d00134 | um02412   | 3.00E-36  | um02412   | 7d00134 | 9.00E-35  |
| BBH | 7d00005 | um05804   | 0         | um05804   | 7d00005 | 0         |
| BBH | 7c00305 | um00909   | 0         | um00909   | 7c00305 | 0         |
| BBH | 7d00095 | um02316   | 1.00E-155 | um02316   | 7d00095 | 1.00E-150 |
| BBH | 7d00336 | um10569   | 0         | um10569   | 7d00336 | 0         |
| BBH | 7c00128 | um10136   | 0         | um10136   | 7c00128 | 0         |
| BBH | 7d00304 | um10623   | 0         | um10623   | 7d00304 | 0         |
| BBH | 7d00290 | um00964   | 0         | um00964   | 7d00290 | 0         |
| BBH | 7d00307 | um00897   | 0         | um00897   | 7d00307 | 0         |
| BBH | 7c00236 | um01027   | 1.00E-151 | um01027   | 7c00236 | 1.00E-149 |
| BBH | 7d00160 | um01228   | 0         | um01228   | 7d00160 | 0         |
| BBH | 7d00081 | um02283   | 3.00E-66  | um02283   | 7d00081 | 4.00E-54  |
| BBH | 7c00040 | um05892   | 1.00E-146 | um05892   | 7c00040 | 1.00E-131 |
| BBH | 7c00164 | um11303   | 0         | um11303   | 7c00164 | 0         |
| BBH | 7c00315 | um00929   | 1.00E-99  | um00929   | 7c00315 | 2.00E-99  |
| BBH | 7d00232 | um01079   | 0         | um01079   | 7d00232 | 0         |
| BBH | 7c00307 | um10617   | 5.00E-41  | um10617   | 7c00307 | 1.00E-37  |
| BBH | 7d00268 | um00997   | 4.00E-94  | um00997   | 7d00268 | 4.00E-88  |
| BBH | 7d00343 | um00862   | 1.00E-52  | um00862   | 7d00343 | 2.00E-52  |
| BBH | 7c00287 | um00957   | 0         | um00957   | 7c00287 | 0         |
| BBH | 7d00270 | um00991   | 1.00E-152 | um00991   | 7d00270 | 1.00E-149 |
| BBH | 7d00082 | um02285   | 0         | um02285   | 7d00082 | 0         |
| BBH | 7d00021 | um05836   | 1.00E-104 | um05836   | 7d00021 | 1.00E-104 |
| BBH | 7c00319 | um00934   | 0         | um00934   | 7c00319 | 0         |
| BBH | 7c00088 | um11403   | 1.00E-110 | um11403   | 7c00088 | 1.00E-119 |
| BBH | 7c00243 | um01040   | 0         | um01040   | 7c00243 | 0         |
| BBH | 7c00090 | um02290   | 1.00E-44  | um02290   | 7c00090 | 2.00E-47  |
| BBH | 7d00291 | um00963   | 0         | um00963   | 7d00291 | 0         |
| BBH | 7d00321 | um10622   | 1.00E-138 | um10622   | 7d00321 | 1.00E-125 |
| BBH | 7d00261 | um01011   | 1.00E-162 | um01011   | 7d00261 | 1.00E-167 |
| BBH | 7c00217 | um11279   | 2.00E-40  | um11279   | 7c00217 | 4.00E-35  |
| BBH | 7d00226 | um01091   | 0         | um01091   | 7d00226 | 0         |
| BBH | 7c00361 | um12300   | 0         | um12300   | 7c00361 | 0         |
| BBH | 7d00090 | um02308   | 3.00E-32  | um02308   | 7d00090 | 1.00E-34  |
| BBH | 7c00190 | um01153   | 0         | um01153   | 7c00190 | 0         |
| BBH | 7d00075 | um02271   | 1.00E-158 | um02271   | 7d00075 | 1.00E-171 |
| BBH | 7c00218 | um01096   | 7.00E-42  | um01096   | 7c00218 | 3.00E-43  |
| BBH | 7d00024 | um05841   | 0         | um05841   | 7d00024 | 0         |
| BBH | 7d00121 | um10135   | 0         | um10135   | 7d00121 | 0         |
| NNN | 7d00014 | um02135   | 8.00E-25  | um02135   | 6d00088 | 1.00E-30  |
| BBH | 7c00197 | um11644   | 0         | um11644   | 7c00197 | 0         |
| BBH | 7c00169 | um01182   | 1.00E-109 | um01182   | 7c00169 | 1.00E-112 |
| NNN | 7d00202 | um01138   | 0         |           |         |           |
| BBH | 7d00032 | um05857   | 0         | um05857   | 7d00032 | 0         |
| BBH | 7c00327 | um00885   | 1.00E-41  | um00885   | 7c00327 | 1.00E-55  |
| BBH | 7c00235 | um01026   | 1.00E-168 | um01026   | 7c00235 | 1.00E-159 |
| NNN | 7d00277 | um00981   | 2.00E-24  | um00981   | 7d00276 | 2.00E-86  |
| BBH | 7c00044 | um05896   | 6.00E-98  | um05896   | 7c00044 | 1.00E-118 |
| BBH | 7d00055 | um05912   | 1.00E-178 | um05912   | 7d00055 | 1.00E-179 |
| BBH | 7c00131 | um02403.2 | 0         | um02403.2 | 7c00131 | 0         |
| BBH | 7c00117 | um02351   | 1.00E-153 | um02351   | 7c00117 | 1.00E-146 |
| BBH | 7c00357 | um00835.2 | 0         | um00835.2 | 7c00357 | 0         |

|     |         |           |           |           |         |           |
|-----|---------|-----------|-----------|-----------|---------|-----------|
| BBH | 7c00348 | um00844   | 1.00E-152 | um00844   | 7c00348 | 1.00E-151 |
| NNN | 7d00087 | um02297   | 4.00E-11  | um02297   | 7c00110 | 1.00E-15  |
| BBH | 7d00281 | um15055   | 0         | um15055   | 7d00281 | 0         |
| BBH | 7c00152 | um01230   | 0         | um01230   | 7c00152 | 0         |
| BBH | 7d00010 | um05818   | 0         | um05818   | 7d00010 | 0         |
| BBH | 7d00152 | um01233   | 0         | um01233   | 7d00152 | 0         |
| BBH | 7d00168 | um01205   | 0         | um01205   | 7d00168 | 0         |
| BBH | 7d00101 | um02326   | 0         | um02326   | 7d00101 | 0         |
| BBH | 7c00146 | um01249   | 1.00E-43  | um01249   | 7c00146 | 2.00E-41  |
| BBH | 7c00346 | um00848.2 | 0         | um00848.2 | 7c00346 | 0         |
| BBH | 7d00333 | um11839.2 | 1.00E-74  | um11839.2 | 7d00333 | 1.00E-94  |
| BBH | 7d00234 | um01075   | 0         | um01075   | 7d00234 | 0         |
| BBH | 7c00091 | um02292   | 0         | um02292   | 7c00091 | 0         |
| BBH | 7c00294 | um00893   | 1.00E-120 | um00893   | 7c00294 | 1.00E-130 |
| BBH | 7c00108 | um02333   | 1.00E-24  | um02333   | 7c00108 | 4.00E-23  |
| BBH | 7c00109 | um02298   | 1.00E-12  | um02298   | 7c00109 | 1.00E-12  |
| BBH | 7c00330 | um00879   | 6.00E-99  | um00879   | 7c00330 | 3.00E-97  |
| BBH | 7d00259 | um01016   | 2.00E-53  | um01016   | 7d00259 | 7.00E-50  |
| BBH | 7c00014 | um11293   | 0         | um11293   | 7c00014 | 0         |
| BBH | 7c00101 | um02323   | 1.00E-104 | um02323   | 7c00101 | 1.00E-102 |
| BBH | 7c00073 | um02260   | 0         | um02260   | 7c00073 | 0         |
| BBH | 7d00223 | um11280   | 0         | um11280   | 7d00223 | 0         |
| BBH | 7d00159 | um01227   | 1.00E-165 | um01227   | 7d00159 | 1.00E-157 |
| BBH | 7c00220 | um01092   | 5.00E-89  | um01092   | 7c00220 | 4.00E-97  |
| BBH | 7d00182 | um01174   | 0         | um01174   | 7d00182 | 0         |
| BBH | 7d00192 | um11650   | 0         | um11650   | 7d00192 | 0         |
| BBH | 7c00049 | um05911   | 0         | um05911   | 7c00049 | 0         |
| BBH | 7c00204 | um01126   | 6.00E-62  | um01126   | 7c00204 | 6.00E-62  |
| BBH | 7d00120 | um10133   | 1.00E-133 | um10133   | 7d00120 | 1.00E-135 |
| BBH | 7c00271 | um00996.2 | 0         | um00996.2 | 7c00271 | 0         |
| BBH | 7d00251 | um01058   | 3.00E-96  | um01058   | 7d00251 | 3.00E-96  |
| BBH | 7d00088 | um15079   | 1.00E-28  | um15079   | 7d00088 | 4.00E-35  |
| BBH | 7d00303 | um10624.2 | 0         | um10624.2 | 7d00303 | 0         |
| BBH | 7c00356 | um00833   | 0         | um00833   | 7c00356 | 0         |
| BBH | 7c00019 | um05833   | 0         | um05833   | 7c00019 | 1.00E-173 |
| BBH | 7c00250 | um01060   | 5.00E-73  | um01060   | 7c00250 | 3.00E-73  |
| BBH | 7d00069 | um15078   | 0         | um15078   | 7d00069 | 0         |
| BBH | 7c00151 | um01231   | 1.00E-114 | um01231   | 7c00151 | 1.00E-130 |
| BBH | 7d00043 | um05888   | 1.00E-109 | um05888   | 7d00043 | 1.00E-117 |
| BBH | 7c00281 | um00967   | 4.00E-20  | um00967   | 7c00281 | 7.00E-27  |
| BBH | 7d00112 | um02346   | 0         | um02346   | 7d00112 | 0         |
| BBH | 7c00276 | um00978   | 1.00E-138 | um00978   | 7c00276 | 1.00E-133 |
| BBH | 7d00327 | um10647   | 1.00E-144 | um10647   | 7d00327 | 1.00E-140 |
| BBH | 7d00199 | um15050   | 0         | um15050   | 7d00199 | 0         |
| BBH | 7c00032 | um05873   | 0         | um05873   | 7c00032 | 0         |
| BBH | 7d00319 | um00927   | 1.00E-104 | um00927   | 7d00319 | 4.00E-94  |
| BBH | 7d00098 | um02320   | 2.00E-28  | um02320   | 7d00098 | 3.00E-28  |
| BBH | 7c00266 | um01005   | 0         | um01005   | 7c00266 | 0         |
| BBH | 7d00357 | um00832   | 1.00E-161 | um00832   | 7d00357 | 0         |
| BBH | 7c00306 | um00911   | 0         | um00911   | 7c00306 | 0         |
| BBH | 7d00051 | um11041.2 | 0         | um11041.2 | 7d00051 | 0         |
| BBH | 7c00189 | um01154   | 0         | um01154   | 7c00189 | 0         |
| BBH | 7c00180 | um01163   | 1.00E-112 | um01163   | 7c00180 | 1.00E-126 |
| BBH | 7d00217 | um01110   | 0         | um01110   | 7d00217 | 0         |
| BBH | 7d00311 | um00908   | 2.00E-41  | um00908   | 7d00311 | 3.00E-50  |
| BBH | 7c00258 | um10797   | 0         | um10797   | 7c00258 | 0         |
| BBH | 7d00260 | um01013   | 2.00E-31  | um01013   | 7d00260 | 9.00E-29  |
| BBH | 7d00022 | um11196   | 0         | um11196   | 7d00022 | 0         |
| BBH | 7c00286 | um00956   | 1.00E-162 | um00956   | 7c00286 | 1.00E-168 |
| NNN | 7d00358 | um11243   | 7.00E-60  |           |         |           |
| BBH | 7c00066 | um10081   | 1.00E-71  | um10081   | 7c00066 | 5.00E-66  |
| BBH | 7d00025 | um05846   | 0         | um05846   | 7d00025 | 0         |

|     |         |           |           |           |          |           |
|-----|---------|-----------|-----------|-----------|----------|-----------|
| BBH | 7d00122 | um02405   | 1.00E-127 | um02405   | 7d00122  | 1.00E-135 |
| BBH | 7c00196 | um01142   | 1.00E-102 | um01142   | 7c00196  | 1.00E-109 |
| BBH | 7c00031 | um05872   | 3.00E-55  | um05872   | 7c00031  | 4.00E-61  |
| BBH | 7c00080 | um02274   | 9.00E-69  | um02274   | 7c00080  | 1.00E-70  |
| BBH | 7c00242 | um11267   | 0         | um11267   | 7c00242  | 0         |
| BBH | 7c00219 | um01093   | 0         | um01093   | 7c00219  | 0         |
| NNN | 7c00056 | um11802   | 8.00E-31  | um11802   | 7c00056  | 6.00E-40  |
| BBH | 7d00344 | um00861   | 0         | um00861   | 7d00344  | 0         |
| BBH | 7d00031 | um05856.2 | 4.00E-41  | um05856.2 | 7d00031  | 7.00E-41  |
| BBH | 7c00210 | um01111   | 1.00E-127 | um01111   | 7c00210  | 1.00E-145 |
| BBH | 7d00349 | um11254   | 9.00E-27  | um11254   | 7d00349  | 3.00E-26  |
| BBH | 7c00160 | um01208   | 6.00E-74  | um01208   | 7c00160  | 3.00E-76  |
| BBH | 7c00089 | um11405   | 1.00E-34  | um11405   | 7c00089  | 2.00E-32  |
| BBH | 7d00258 | um15056   | 0         | um15056   | 7d00258  | 0         |
| BBH | 7c00147 | um01246   | 1.00E-132 | um01246   | 7c00147  | 1.00E-133 |
| BBH | 7d00151 | um01237   | 3.00E-24  | um01237   | 7d00151  | 1.00E-23  |
| BBH | 7c00347 | um11249   | 1.00E-152 | um11249   | 7c00347  | 1.00E-152 |
| BBH | 7c00187 | um01156   | 0         | um01156   | 7c00187  | 0         |
| BBH | 7d00339 | um11262   | 1.00E-24  | um11262   | 7d00339  | 4.00E-25  |
| BBH | 7c00324 | um00887   | 0         | um00887   | 7c00324  | 0         |
| BBH | 7d00235 | um01073   | 4.00E-41  | um01073   | 7d00235  | 6.00E-40  |
| BBH | 7c00334 | um00872   | 0         | um00872   | 7c00334  | 0         |
| BBH | 7d00350 | um00847   | 5.00E-91  | um00847   | 7d00350  | 1.00E-97  |
| BBH | 7c00349 | um11246   | 0         | um11246   | 7c00349  | 0         |
| NNN | 7c00043 | um05896   | 2.00E-13  | um05896   | 7c00044  | 1.00E-118 |
| BBH | 7c00195 | um01143   | 1.00E-170 | um01143   | 7c00195  | 1.00E-172 |
| BBH | 7c00234 | um11274   | 3.00E-21  | um11274   | 7c00234  | 3.00E-21  |
| BBH | 7d00276 | um00981   | 1.00E-90  | um00981   | 7d00276  | 2.00E-86  |
| NNN | 7c00358 | um10544   | 9.00E-87  | um10544   | 15d00088 | 3.00E-93  |
| BBH | 7d00054 | um05910   | 1.00E-107 | um05910   | 7d00054  | 1.00E-108 |
| BBH | 7d00280 | um00983   | 0         | um00983   | 7d00280  | 0         |
| BBH | 7c00304 | um00907   | 1.00E-166 | um00907   | 7c00304  | 1.00E-162 |
| BBH | 7c00318 | um00915   | 0         | um00915   | 7c00318  | 0         |
| NNN | 7d00267 | um00995   | 1.00E-172 |           |          |           |
| BBH | 7c00340 | um12114   | 2.00E-45  | um12114   | 7c00340  | 1.00E-62  |
| BBH | 7d00292 | um00961   | 1.00E-147 | um00961   | 7d00292  | 1.00E-143 |
| BBH | 7d00351 | um11248   | 5.00E-74  | um11248   | 7d00351  | 9.00E-80  |
| BBH | 7c00351 | um00842   | 0         | um00842   | 7c00351  | 0         |
| BBH | 7d00309 | um12116.2 | 0         | um12116.2 | 7d00309  | 0         |
| BBH | 7d00306 | um00895   | 0         | um00895   | 7d00306  | 0         |
| BBH | 7d00097 | um11700.2 | 1.00E-151 | um11700.2 | 7d00097  | 1.00E-151 |
| BBH | 7d00165 | um01209   | 0         | um01209   | 7d00165  | 0         |
| NNN | 7d00123 | um02402   | 2.00E-53  |           |          |           |
| BBH | 7d00250 | um11271   | 0         | um11271   | 7d00250  | 0         |
| BBH | 7c00335 | um00871   | 0         | um00871   | 7c00335  | 1.00E-156 |
| BBH | 7d00225 | um01094   | 1.00E-129 | um01094   | 7d00225  | 1.00E-128 |
| BBH | 7c00221 | um01089   | 0         | um01089   | 7c00221  | 0         |
| BBH | 7d00248 | um01048   | 0         | um01048   | 7d00248  | 0         |
| NNN | 7d00085 | um02293   | 2.00E-36  | um02293   | 12c00084 | 8.00E-53  |
| BBH | 7d00181 | um01176.2 | 7.00E-56  | um01176.2 | 7d00181  | 5.00E-60  |
| BBH | 7d00222 | um11281   | 0         | um11281   | 7d00222  | 0         |
| BBH | 7c00280 | um10591   | 6.00E-83  | um10591   | 7c00280  | 4.00E-83  |
| BBH | 7c00013 | um05825   | 1.00E-179 | um05825   | 7c00013  | 1.00E-170 |
| BBH | 7c00174 | um01178   | 0         | um01178   | 7c00174  | 0         |
| BBH | 7c00325 | um03226   | 0         | um03226   | 7c00325  | 0         |
| BBH | 7d00218 | um11284   | 0         | um11284   | 7d00218  | 0         |
| BBH | 7d00312 | um10616   | 8.00E-77  | um10616   | 7d00312  | 8.00E-77  |
| BBH | 7c00289 | um00945   | 0         | um00945   | 7c00289  | 0         |
| BBH | 7c00360 | um05249   | 0         | um05249   | 7c00360  | 0         |
| BBH | 7c00267 | um10795   | 0         | um10795   | 7c00267  | 0         |
| BBH | 7c00102 | um02325.2 | 1.00E-99  | um02325.2 | 7c00102  | 1.00E-100 |
| BBH | 7c00259 | um01014   | 6.00E-53  | um01014   | 7c00259  | 3.00E-47  |

|     |         |           |           |           |         |           |
|-----|---------|-----------|-----------|-----------|---------|-----------|
| BBH | 7d00180 | um11301   | 0         | um11301   | 7d00180 | 0         |
| BBH | 7c00100 | um11702   | 1.00E-119 | um11702   | 7c00100 | 1.00E-118 |
| BBH | 7c00188 | um12128   | 0         | um12128   | 7c00188 | 0         |
| BBH | 7c00150 | um01234   | 2.00E-64  | um01234   | 7c00150 | 6.00E-58  |
| BBH | 7c00074 | um12184   | 5.00E-48  | um12184   | 7c00074 | 5.00E-46  |
| BBH | 7d00107 | um02340   | 0         | um02340   | 7d00107 | 0         |
| BBH | 7c00020 | um11194   | 1.00E-179 | um11194   | 7c00020 | 0         |
| BBH | 7d00104 | um11708   | 2.00E-47  | um11708   | 7d00104 | 1.00E-47  |
| BBH | 7d00111 | um02344   | 0         | um02344   | 7d00111 | 0         |
| BBH | 7d00328 | um03227   | 1.00E-107 | um03227   | 7d00328 | 1.00E-108 |
| BBH | 7d00215 | um01114   | 1.00E-101 | um01114   | 7d00215 | 1.00E-100 |
| BBH | 7c00277 | um11848   | 2.00E-72  | um11848   | 7c00277 | 2.00E-72  |
| BBH | 7c00205 | um01122   | 0         | um01122   | 7c00205 | 0         |
| BBH | 8d00053 | um03522   | 0         | um03522   | 8d00053 | 0         |
| BBH | 8d00103 | um03418   | 0         | um03418   | 8d00103 | 0         |
| BBH | 8d00114 | um12229   | 1.00E-160 | um12229   | 8d00114 | 1.00E-160 |
| BBH | 8d00029 | um03614   | 0         | um03614   | 8d00029 | 0         |
| BBH | 8d00063 | um11090   | 1.00E-151 | um11090   | 8d00063 | 1.00E-161 |
| BBH | 8d00093 | um03450   | 1.00E-59  | um03450   | 8d00093 | 2.00E-57  |
| BBH | 8c00079 | um03485   | 4.00E-88  | um03485   | 8c00079 | 4.00E-88  |
| BBH | 8c00020 | um03596   | 1.00E-155 | um03596   | 8c00020 | 1.00E-154 |
| BBH | 8d00047 | um03541   | 2.00E-77  | um03541   | 8d00047 | 3.00E-79  |
| BBH | 8c00106 | um03435   | 0         | um03435   | 8c00106 | 0         |
| BBH | 8c00011 | um12234   | 3.00E-46  | um12234   | 8c00011 | 4.00E-45  |
| BBH | 8c00001 | um03558   | 0         | um03558   | 8c00001 | 0         |
| BBH | 8c00091 | um03461   | 1.00E-35  | um03461   | 8c00091 | 1.00E-36  |
| BBH | 8d00054 | um12233   | 1.00E-123 | um12233   | 8d00054 | 1.00E-128 |
| BBH | 8c00064 | um03518   | 0         | um03518   | 8c00064 | 0         |
| BBH | 8c00028 | um03608   | 2.00E-86  | um03608   | 8c00028 | 1.00E-101 |
| BBH | 8c00047 | um03540   | 3.00E-61  | um03540   | 8c00047 | 6.00E-61  |
| BBH | 8c00038 | um03556   | 8.00E-40  | um03556   | 8c00038 | 4.00E-36  |
| BBH | 8c00021 | um03598   | 1.00E-157 | um03598   | 8c00021 | 1.00E-144 |
| BBH | 8d00077 | um03478   | 1.00E-147 | um03478   | 8d00077 | 1.00E-147 |
| BBH | 8c00055 | um03530   | 1.00E-39  | um03530   | 8c00055 | 3.00E-35  |
| BBH | 8d00007 | um03570   | 1.00E-83  | um03570   | 8d00007 | 2.00E-76  |
| BBH | 8d00106 | um03422   | 1.00E-105 | um03422   | 8d00106 | 1.00E-111 |
| BBH | 8d00021 | um03605   | 0         | um03605   | 8d00021 | 0         |
| BBH | 8c00108 | um03431   | 0         | um03431   | 8c00108 | 0         |
| BBH | 8c00012 | um10574   | 0         | um10574   | 8c00012 | 0         |
| BBH | 8d00104 | um03419   | 1.00E-107 | um03419   | 8d00104 | 1.00E-108 |
| BBH | 8d00109 | um11070   | 1.00E-173 | um11070   | 8d00109 | 1.00E-172 |
| BBH | 8c00105 | um10438   | 0         | um10438   | 8c00105 | 0         |
| BBH | 8d00039 | um03632   | 0         | um03632   | 8d00039 | 0         |
| BBH | 8d00028 | um03613   | 0         | um03613   | 8d00028 | 0         |
| BBH | 8d00064 | um03496   | 1.00E-63  | um03496   | 8d00064 | 2.00E-52  |
| BBH | 8c00078 | um03491   | 5.00E-66  | um03491   | 8c00078 | 1.00E-54  |
| BBH | 8c00118 | um03411   | 1.00E-126 | um03411   | 8c00118 | 1.00E-130 |
| BBH | 8c00052 | um11100   | 1.00E-176 | um11100   | 8c00052 | 1.00E-171 |
| BBH | 8d00051 | um03528   | 0         | um03528   | 8d00051 | 0         |
| BBH | 8c00081 | um11084.2 | 0         | um11084.2 | 8c00081 | 0         |
| BBH | 8d00115 | um03407   | 0         | um03407   | 8d00115 | 0         |
| BBH | 8c00065 | um03515   | 0         | um03515   | 8c00065 | 0         |
| BBH | 8c00090 | um03464   | 1.00E-111 | um03464   | 8c00090 | 1.00E-114 |
| BBH | 8d00020 | um03602   | 1.00E-109 | um03602   | 8d00020 | 1.00E-111 |
| BBH | 8d00055 | um03514   | 0         | um03514   | 8d00055 | 0         |
| BBH | 8c00088 | um03467   | 2.00E-71  | um03467   | 8c00088 | 3.00E-73  |
| BBH | 8d00040 | um03557   | 0         | um03557   | 8d00040 | 0         |
| BBH | 8c00033 | um03621   | 1.00E-122 | um03621   | 8c00033 | 0         |
| BBH | 8c00107 | um03433   | 4.00E-62  | um03433   | 8c00107 | 2.00E-60  |
| BBH | 8c00002 | um03560   | 0         | um03560   | 8c00002 | 0         |
| BBH | 8d00078 | um03475   | 0         | um03475   | 8d00078 | 0         |
| BBH | 8d00001 | um03559   | 0         | um03559   | 8d00001 | 0         |

|     |         |           |           |           |         |           |
|-----|---------|-----------|-----------|-----------|---------|-----------|
| BBH | 8c00044 | um03544   | 1.00E-153 | um03544   | 8c00044 | 1.00E-154 |
| BBH | 8d00006 | um03568   | 0         | um03568   | 8d00006 | 0         |
| BBH | 8c00127 | um03406   | 1.00E-42  | um03406   | 8c00127 | 1.00E-44  |
| BBH | 8c00077 | um03493   | 7.00E-89  | um03493   | 8c00077 | 7.00E-82  |
| BBH | 8d00086 | um03463   | 0         | um03463   | 8d00086 | 0         |
| BBH | 8c00100 | um03448   | 0         | um03448   | 8c00100 | 0         |
| BBH | 8d00070 | um03486   | 1.00E-135 | um03486   | 8d00070 | 1.00E-129 |
| BBH | 8c00013 | um10577   | 2.00E-87  | um10577   | 8c00013 | 6.00E-89  |
| BBH | 8d00036 | um12237   | 7.00E-30  | um12237   | 8d00036 | 7.00E-30  |
| BBH | 8d00116 | um03409   | 0         | um03409   | 8d00116 | 0         |
| BBH | 8d00101 | um11077   | 0         | um11077   | 8d00101 | 0         |
| BBH | 8d00068 | um11086   | 0         | um11086   | 8d00068 | 1.00E-180 |
| BBH | 8c00117 | um11074   | 0         | um11074   | 8c00117 | 0         |
| BBH | 8d00035 | um03624   | 0         | um03624   | 8d00035 | 0         |
| BBH | 8c00110 | um11076   | 1.00E-117 | um11076   | 8c00110 | 1.00E-129 |
| BBH | 8c00082 | um03480   | 9.00E-99  | um03480   | 8c00082 | 3.00E-98  |
| BBH | 8c00066 | um03513   | 1.00E-101 | um03513   | 8c00066 | 1.00E-108 |
| BBH | 8c00093 | um12231   | 1.00E-26  | um12231   | 8c00093 | 1.00E-33  |
| NNN | 8c00068 | um11782   | 1.00E-66  |           |         |           |
| BBH | 8c00004 | um03564   | 3.00E-35  | um03564   | 8c00004 | 1.00E-39  |
| BBH | 8c00003 | um03563   | 1.00E-107 | um03563   | 8c00003 | 1.00E-107 |
| BBH | 8c00122 | um03397   | 3.00E-27  | um03397   | 8c00122 | 3.00E-27  |
| BBH | 8d00052 | um11097   | 4.00E-15  | um11097   | 8d00052 | 1.00E-15  |
| BBH | 8c00023 | um03601   | 5.00E-25  | um03601   | 8c00023 | 2.00E-24  |
| BBH | 8d00018 | um03593   | 1.00E-149 | um03593   | 8d00018 | 1.00E-146 |
| BBH | 8c00032 | um03620   | 0         | um03620   | 8c00032 | 0         |
| NNN | 8d00071 | um11083   | 1.00E-102 |           |         |           |
| BBH | 8d00037 | um03631   | 1.00E-59  | um03631   | 8d00037 | 2.00E-67  |
| BBH | 8d00073 | um10447   | 1.00E-27  | um10447   | 8d00073 | 2.00E-31  |
| BBH | 8c00014 | um03590   | 1.00E-164 | um03590   | 8c00014 | 1.00E-180 |
| BBH | 8d00087 | um03459   | 0         | um03459   | 8d00087 | 0         |
| BBH | 8c00025 | um11505   | 1.00E-43  | um11505   | 8c00025 | 1.00E-43  |
| BBH | 8c00128 | um03408   | 1.00E-179 | um03408   | 8c00128 | 0         |
| BBH | 8c00076 | um03494   | 0         | um03494   | 8c00076 | 0         |
| BBH | 8d00094 | um03446   | 0         | um03446   | 8d00094 | 0         |
| BBH | 8d00046 | um03542   | 3.00E-83  | um03542   | 8d00046 | 1.00E-100 |
| BBH | 8d00102 | um11075   | 2.00E-20  | um11075   | 8d00102 | 5.00E-26  |
| BBH | 8c00085 | um03474   | 0         | um03474   | 8c00085 | 0         |
| BBH | 8c00109 | um11078   | 1.00E-101 | um11078   | 8c00109 | 1.00E-107 |
| BBH | 8c00046 | um03543   | 1.00E-103 | um03543   | 8c00046 | 1.00E-104 |
| BBH | 8c00041 | um03550   | 1.00E-168 | um03550   | 8c00041 | 1.00E-163 |
| BBH | 8c00022 | um03599   | 0         | um03599   | 8c00022 | 0         |
| BBH | 8c00102 | um03445   | 8.00E-71  | um03445   | 8c00102 | 8.00E-71  |
| BBH | 8d00066 | um11088   | 0         | um11088   | 8d00066 | 0         |
| BBH | 8c00083 | um03477   | 0         | um03477   | 8c00083 | 0         |
| BBH | 8d00013 | um10575   | 2.00E-89  | um10575   | 8d00013 | 8.00E-92  |
| BBH | 8c00054 | um11099   | 0         | um11099   | 8c00054 | 0         |
| BBH | 8c00005 | um03565   | 0         | um03565   | 8c00005 | 0         |
| BBH | 8c00092 | um03460   | 1.00E-53  | um03460   | 8c00092 | 2.00E-55  |
| NNN | 8c00067 | um03511   | 2.00E-88  |           |         |           |
| BBH | 8c00057 | um11098   | 0         | um11098   | 8c00057 | 0         |
| BBH | 8c00112 | um03414   | 0         | um03414   | 8c00112 | 0         |
| BBH | 8c00059 | um03524   | 0         | um03524   | 8c00059 | 0         |
| BBH | 8c00126 | um03404   | 0         | um03404   | 8c00126 | 0         |
| BBH | 8c00095 | um03454   | 0         | um03454   | 8c00095 | 0         |
| BBH | 8c00097 | um10444   | 7.00E-89  | um10444   | 8c00097 | 6.00E-89  |
| BBH | 8c00016 | um03588   | 0         | um03588   | 8c00016 | 0         |
| BBH | 8c00024 | um03603   | 0         | um03603   | 8c00024 | 0         |
| BBH | 8d00088 | um03458   | 1.00E-53  | um03458   | 8d00088 | 6.00E-49  |
| BBH | 8c00048 | um03538   | 0         | um03538   | 8c00048 | 0         |
| BBH | 8d00089 | um03456   | 2.00E-38  | um03456   | 8d00089 | 9.00E-43  |
| BBH | 8c00043 | um03547.2 | 0         | um03547.2 | 8c00043 | 0         |

|     |         |           |           |           |         |           |
|-----|---------|-----------|-----------|-----------|---------|-----------|
| BBH | 8d00085 | um03465   | 0         | um03465   | 8d00085 | 0         |
| BBH | 8d00057 | um11093.2 | 2.00E-40  | um11093.2 | 8d00057 | 2.00E-35  |
| BBH | 8c00120 | um05791   | 1.00E-143 | um05791   | 8c00120 | 1.00E-152 |
| BBH | 8c00086 | um03473   | 0         | um03473   | 8c00086 | 0         |
| BBH | 8d00067 | um11087   | 0         | um11087   | 8d00067 | 0         |
| BBH | 8d00044 | um03548   | 1.00E-163 | um03548   | 8d00044 | 1.00E-163 |
| BBH | 8c00101 | um10442   | 1.00E-113 | um10442   | 8c00101 | 1.00E-109 |
| NNN | 8c00125 | um03402   | 0         |           |         |           |
| BBH | 8d00012 | um03580   | 1.00E-158 | um03580   | 8d00012 | 1.00E-158 |
| BBH | 8d00097 | um03442   | 0         | um03442   | 8d00097 | 0         |
| BBH | 8c00075 | um03495   | 1.00E-111 | um03495   | 8c00075 | 1.00E-104 |
| BBH | 8d00074 | um03481   | 3.00E-63  | um03481   | 8d00074 | 3.00E-66  |
| BBH | 8c00119 | um03476   | 2.00E-79  | um03476   | 8c00119 | 2.00E-83  |
| BBH | 8d00043 | um03553   | 3.00E-54  | um03553   | 8d00043 | 1.00E-58  |
| BBH | 8c00056 | um03529   | 1.00E-143 | um03529   | 8c00056 | 1.00E-144 |
| BBH | 8c00061 | um03521   | 1.00E-25  | um03521   | 8c00061 | 3.00E-45  |
| BBH | 8c00006 | um03567   | 4.00E-92  | um03567   | 8c00006 | 8.00E-84  |
| BBH | 8c00071 | um11092   | 1.00E-139 | um11092   | 8c00071 | 1.00E-139 |
| BBH | 8d00090 | um12230.2 | 3.00E-13  | um12230.2 | 8d00090 | 7.00E-15  |
| BBH | 8c00017 | um03585   | 1.00E-106 | um03585   | 8c00017 | 1.00E-106 |
| BBH | 8c00111 | um03412   | 1.00E-52  | um03412   | 8c00111 | 8.00E-51  |
| NNN | 8d00059 | um02704   | 3.00E-66  | um02704   | 5d00046 | 0         |
| BBH | 8c00034 | um03623   | 0         | um03623   | 8c00034 | 0         |
| NNN | 8c00096 | um10444   | 7.00E-70  | um10444   | 8c00097 | 6.00E-89  |
| BBH | 8c00094 | um10445   | 1.00E-140 | um10445   | 8c00094 | 1.00E-148 |
| BBH | 8d00002 | um03561   | 0         | um03561   | 8d00002 | 0         |
| BBH | 8c00031 | um03617   | 0         | um03617   | 8c00031 | 0         |
| BBH | 8c00037 | um03629   | 0         | um03629   | 8c00037 | 0         |
| BBH | 8d00107 | um11073   | 0         | um11073   | 8d00107 | 0         |
| NNN | 8c00040 | um03551   | 0         |           |         |           |
| BBH | 8c00027 | um03607   | 0         | um03607   | 8c00027 | 0         |
| BBH | 8c00049 | um03537   | 0         | um03537   | 8c00049 | 1.00E-176 |
| BBH | 8c00074 | um03498   | 0         | um03498   | 8c00074 | 0         |
| BBH | 8d00045 | um11731   | 1.00E-20  | um11731   | 8d00045 | 3.00E-25  |
| BBH | 8d00015 | um12236   | 1.00E-136 | um12236   | 8d00015 | 1.00E-138 |
| NNN | 8d00025 | um02704   | 1.00E-65  | um02704   | 5d00046 | 0         |
| BBH | 8c00087 | um03468   | 1.00E-85  | um03468   | 8c00087 | 5.00E-78  |
| BBH | 8d00056 | um11095.2 | 0         | um11095.2 | 8d00056 | 0         |
| BBH | 8d00069 | um10448   | 0         | um10448   | 8d00069 | 0         |
| BBH | 8d00110 | um03396   | 0         | um03396   | 8d00110 | 0         |
| BBH | 8d00019 | um03597   | 0         | um03597   | 8d00019 | 0         |
| BBH | 8d00034 | um03622   | 1.00E-137 | um03622   | 8d00034 | 1.00E-155 |
| BBH | 8c00060 | um03523   | 0         | um03523   | 8c00060 | 0         |
| BBH | 8d00096 | um10440.2 | 0         | um10440.2 | 8d00096 | 0         |
| BBH | 8c00045 | um15005   | 0         | um15005   | 8c00045 | 0         |
| BBH | 8d00010 | um03576   | 0         | um03576   | 8d00010 | 0         |
| BBH | 8d00005 | um10571   | 1.00E-180 | um10571   | 8d00005 | 0         |
| NNN | 8d00041 | um03557   | 2.00E-77  | um03557   | 8d00040 | 0         |
| BBH | 8d00023 | um03609   | 0         | um03609   | 8d00023 | 0         |
| BBH | 8c00114 | um03417   | 0         | um03417   | 8c00114 | 0         |
| BBH | 8c00008 | um03572   | 1.00E-85  | um03572   | 8c00008 | 1.00E-90  |
| BBH | 8c00116 | um03424   | 1.00E-45  | um03424   | 8c00116 | 1.00E-38  |
| BBH | 8c00007 | um03569   | 0         | um03569   | 8c00007 | 0         |
| BBH | 8c00062 | um03520   | 0         | um03520   | 8c00062 | 0         |
| BBH | 8c00072 | um11091   | 0         | um11091   | 8c00072 | 0         |
| BBH | 8c00050 | um03536   | 1.00E-160 | um03536   | 8c00050 | 1.00E-148 |
| BBH | 8c00026 | um01301   | 3.00E-18  | um01301   | 8c00026 | 4.00E-18  |
| BBH | 8c00053 | um03533   | 8.00E-66  | um03533   | 8c00053 | 8.00E-66  |
| BBH | 8c00030 | um03615   | 0         | um03615   | 8c00030 | 0         |
| BBH | 8c00036 | um03628   | 0         | um03628   | 8c00036 | 0         |
| BBH | 8d00014 | um11960   | 1.00E-175 | um11960   | 8d00014 | 0         |
| BBH | 8c00029 | um03610   | 0         | um03610   | 8c00029 | 0         |

|     |         |           |           |           |         |           |
|-----|---------|-----------|-----------|-----------|---------|-----------|
| BBH | 8c00123 | um11067   | 0         | um11067   | 8c00123 | 0         |
| BBH | 8d00099 | um03436   | 0         | um03436   | 8d00099 | 0         |
| BBH | 8d00108 | um03425   | 0         | um03425   | 8d00108 | 0         |
| BBH | 8d00030 | um03616   | 0         | um03616   | 8d00030 | 0         |
| BBH | 8d00111 | um03398   | 0         | um03398   | 8d00111 | 0         |
| BBH | 8c00104 | um10439   | 2.00E-60  | um10439   | 8c00104 | 1.00E-60  |
| BBH | 8c00073 | um11089   | 1.00E-148 | um11089   | 8c00073 | 1.00E-146 |
| BBH | 8d00016 | um11959   | 5.00E-38  | um11959   | 8d00016 | 4.00E-38  |
| BBH | 8d00050 | um03532   | 1.00E-145 | um03532   | 8d00050 | 1.00E-140 |
| BBH | 8d00024 | um03611   | 0         | um03611   | 8d00024 | 0         |
| BBH | 8c00070 | um03506   | 1.00E-150 | um03506   | 8c00070 | 1.00E-131 |
| BBH | 8d00009 | um03573   | 1.00E-68  | um03573   | 8d00009 | 7.00E-56  |
| BBH | 8d00060 | um03505.2 | 0         | um03505.2 | 8d00060 | 0         |
| BBH | 8d00011 | um10573   | 1.00E-92  | um10573   | 8d00011 | 2.00E-96  |
| BBH | 8c00089 | um03466   | 1.00E-128 | um03466   | 8c00089 | 1.00E-137 |
| BBH | 8d00082 | um03471   | 0         | um03471   | 8d00082 | 0         |
| BBH | 8d00022 | um11506   | 7.00E-72  | um11506   | 8d00022 | 7.00E-72  |
| BBH | 8d00062 | um03501   | 0         | um03501   | 8d00062 | 0         |
| BBH | 8c00042 | um03549   | 0         | um03549   | 8c00042 | 0         |
| BBH | 8d00004 | um11732   | 1.00E-103 | um11732   | 8d00004 | 3.00E-99  |
| BBH | 8c00063 | um11096   | 8.00E-80  | um11096   | 8c00063 | 1.00E-80  |
| BBH | 8c00010 | um03575   | 1.00E-103 | um03575   | 8c00010 | 1.00E-102 |
| BBH | 8c00058 | um03525   | 0         | um03525   | 8c00058 | 0         |
| BBH | 8c00113 | um03416   | 1.00E-134 | um03416   | 8c00113 | 1.00E-134 |
| BBH | 8c00009 | um03574   | 6.00E-59  | um03574   | 8c00009 | 2.00E-63  |
| BBH | 8d00100 | um03434   | 0         | um03434   | 8d00100 | 0         |
| BBH | 8d00113 | um03403.2 | 0         | um03403.2 | 8d00113 | 0         |
| BBH | 8c00115 | um03421   | 0         | um03421   | 8c00115 | 0         |
| NNN | 8c00098 | um10443.2 | 7.00E-32  |           |         |           |
| BBH | 8c00019 | um03595   | 1.00E-162 | um03595   | 8c00019 | 1.00E-147 |
| BBH | 8d00048 | um03539   | 1.00E-143 | um03539   | 8d00048 | 1.00E-137 |
| BBH | 8c00051 | um03534   | 0         | um03534   | 8c00051 | 0         |
| BBH | 8d00112 | um11068   | 0         | um11068   | 8d00112 | 0         |
| BBH | 8c00018 | um03583   | 1.00E-136 | um03583   | 8c00018 | 1.00E-130 |
| BBH | 8c00039 | um03554   | 1.00E-161 | um03554   | 8c00039 | 1.00E-172 |
| BBH | 8d00017 | um03584   | 0         | um03584   | 8d00017 | 0         |
| NNN | 8c00103 | um03443   | 2.00E-75  |           |         |           |
| BBH | 8d00031 | um03618   | 0         | um03618   | 8d00031 | 0         |
| BBH | 8d00105 | um11071   | 1.00E-133 | um11071   | 8d00105 | 1.00E-140 |
| BBH | 8c00124 | um03400   | 0         | um03400   | 8c00124 | 0         |
| BBH | 8d00076 | um10446   | 0         | um10446   | 8d00076 | 0         |
| BBH | 8d00032 | um03619   | 0         | um03619   | 8d00032 | 0         |
| BBH | 8d00042 | um03555   | 0         | um03555   | 8d00042 | 0         |
| NNN | 8d00091 | um03451   | 1.00E-173 |           |         |           |
| BBH | 8d00083 | um03470   | 0         | um03470   | 8d00083 | 0         |
| BBH | 8d00084 | um03469   | 1.00E-179 | um03469   | 8d00084 | 0         |
| BBH | 8d00098 | um03437   | 1.00E-179 | um03437   | 8d00098 | 1.00E-172 |
| BBH | 8d00008 | um03571   | 1.00E-118 | um03571   | 8d00008 | 1.00E-119 |
| BBH | 8d00058 | um03508   | 1.00E-152 | um03508   | 8d00058 | 1.00E-147 |
| NNN | 8d00061 | um03504   | 1.00E-160 |           |         |           |
| BBH | 9c00012 | um00025   | 0         | um00025   | 9c00012 | 0         |
| BBH | 9d00070 | um00130   | 1.00E-121 | um00130   | 9d00070 | 1.00E-121 |
| BBH | 9c00224 | um00397   | 2.00E-46  | um00397   | 9c00224 | 2.00E-46  |
| BBH | 9d00355 | um00708   | 0         | um00708   | 9d00355 | 0         |
| NNN | 9d00335 | um00676   | 0         |           |         |           |
| BBH | 9c00367 | um11829   | 0         | um11829   | 9c00367 | 0         |
| BBH | 9d00194 | um00405   | 1.00E-178 | um00405   | 9d00194 | 1.00E-175 |
| BBH | 9d00228 | um00469   | 3.00E-42  | um00469   | 9d00228 | 6.00E-47  |
| BBH | 9c00177 | um00317   | 7.00E-79  | um00317   | 9c00177 | 1.00E-78  |
| BBH | 9c00341 | um10928   | 4.00E-77  | um10928   | 9c00341 | 4.00E-88  |
| BBH | 9c00030 | um10011   | 0         | um10011   | 9c00030 | 0         |
| BBH | 9c00403 | um11625   | 2.00E-33  | um11625   | 9c00403 | 2.00E-32  |

|     |         |           |           |           |          |           |
|-----|---------|-----------|-----------|-----------|----------|-----------|
| BBH | 9d00347 | um00695   | 0         | um00695   | 9d00347  | 0         |
| BBH | 9c00375 | um00685   | 0         | um00685   | 9c00375  | 0         |
| BBH | 9c00024 | um00030   | 0         | um00030   | 9c00024  | 0         |
| BBH | 9d00207 | um12151   | 0         | um12151   | 9d00207  | 0         |
| BBH | 9d00109 | um11421   | 0         | um11421   | 9d00109  | 0         |
| BBH | 9c00393 | um11174   | 5.00E-57  | um11174   | 9c00393  | 2.00E-56  |
| BBH | 9d00256 | um00528   | 0         | um00528   | 9d00256  | 0         |
| BBH | 9d00293 | um00598   | 1.00E-180 | um00598   | 9d00293  | 1.00E-180 |
| BBH | 9c00094 | um00156.2 | 1.00E-118 | um00156.2 | 9c00094  | 1.00E-121 |
| NNN | 9d00123 | um00244   | 3.00E-96  |           |          |           |
| NNN | 9d00312 | um05897   | 1.00E-107 |           |          |           |
| BBH | 9c00141 | um11429   | 5.00E-41  | um11429   | 9c00141  | 3.00E-41  |
| BBH | 9c00184 | um00328   | 1.00E-128 | um00328   | 9c00184  | 1.00E-131 |
| BBH | 9d00379 | um00748   | 2.00E-41  | um00748   | 9d00379  | 2.00E-41  |
| BBH | 9d00340 | um11619   | 3.00E-55  | um11619   | 9d00340  | 1.00E-55  |
| BBH | 9d00183 | um00364.2 | 0         | um00364.2 | 9d00183  | 0         |
| BBH | 9c00251 | um00455   | 1.00E-138 | um00455   | 9c00251  | 1.00E-151 |
| BBH | 9d00044 | um10021   | 1.00E-109 | um10021   | 9d00044  | 1.00E-109 |
| BBH | 9d00016 | um12107   | 0         | um12107   | 9d00016  | 0         |
| BBH | 9c00226 | um00407   | 0         | um00407   | 9c00226  | 0         |
| BBH | 9d00027 | um00048   | 3.00E-70  | um00048   | 9d00027  | 2.00E-69  |
| BBH | 9d00157 | um10099   | 1.00E-106 | um10099   | 9d00157  | 1.00E-105 |
| BBH | 9d00112 | um00223   | 1.00E-136 | um00223   | 9d00112  | 1.00E-153 |
| BBH | 9d00046 | um00096   | 1.00E-108 | um00096   | 9d00046  | 1.00E-108 |
| BBH | 9c00110 | um00171   | 2.00E-30  | um00171   | 9c00110  | 1.00E-29  |
| BBH | 9d00411 | um11629   | 4.00E-68  | um11629   | 9d00411  | 1.00E-68  |
| BBH | 9d00213 | um00442   | 1.00E-19  | um00442   | 9d00213  | 6.00E-14  |
| BBH | 9c00290 | um00527   | 1.00E-41  | um00527   | 9c00290  | 1.00E-52  |
| BBH | 9c00258 | um10118   | 2.00E-76  | um10118   | 9c00258  | 7.00E-77  |
| BBH | 9c00294 | um11440.2 | 1.00E-157 | um11440.2 | 9c00294  | 1.00E-149 |
| BBH | 9c00322 | um00592   | 0         | um00592   | 9c00322  | 0         |
| BBH | 9c00338 | um10926   | 0         | um10926   | 9c00338  | 0         |
| BBH | 9c00261 | um00475   | 0         | um00475   | 9c00261  | 0         |
| BBH | 9c00415 | um00767   | 2.00E-55  | um00767   | 9c00415  | 1.00E-106 |
| BBH | 9c00163 | um00290   | 0         | um00290   | 9c00163  | 0         |
| BBH | 9c00084 | um00133   | 1.00E-159 | um00133   | 9c00084  | 1.00E-159 |
| NNN | 9d00172 | um00387   | 6.00E-56  | um00387   | 16c00076 | 9.00E-78  |
| BBH | 9d00407 | um00801   | 0         | um00801   | 9d00407  | 0         |
| BBH | 9c00361 | um00656   | 0         | um00656   | 9c00361  | 0         |
| BBH | 9c00380 | um00696   | 0         | um00696   | 9c00380  | 0         |
| BBH | 9c00301 | um00543   | 0         | um00543   | 9c00301  | 0         |
| BBH | 9d00358 | um00714   | 0         | um00714   | 9d00358  | 0         |
| BBH | 9c00432 | um11630   | 5.00E-57  | um11630   | 9c00432  | 6.00E-55  |
| BBH | 9c00314 | um00575   | 0         | um00575   | 9c00314  | 0         |
| BBH | 9d00307 | um00625   | 0         | um00625   | 9d00307  | 0         |
| BBH | 9d00233 | um00480   | 1.00E-118 | um00480   | 9d00233  | 1.00E-123 |
| BBH | 9c00218 | um00361   | 0         | um00361   | 9c00218  | 0         |
| BBH | 9c00153 | um00266   | 2.00E-57  | um00266   | 9c00153  | 8.00E-57  |
| BBH | 9d00384 | um00760   | 0         | um00760   | 9d00384  | 0         |
| BBH | 9c00389 | um00716.2 | 8.00E-69  | um00716.2 | 9c00389  | 7.00E-66  |
| BBH | 9c00305 | um00555   | 0         | um00555   | 9c00305  | 0         |
| NNN | 9c00280 | um12105   | 2.00E-38  | um12105   | 9c00281  | 2.00E-51  |
| BBH | 9c00135 | um11424   | 1.00E-163 | um11424   | 9c00135  | 1.00E-152 |
| BBH | 9c00362 | um00655   | 0         | um00655   | 9c00362  | 0         |
| BBH | 9c00103 | um00180   | 1.00E-107 | um00180   | 9c00103  | 8.00E-93  |
| BBH | 9d00166 | um11344   | 1.00E-144 | um11344   | 9d00166  | 1.00E-146 |
| BBH | 9d00263 | um00540   | 1.00E-180 | um00540   | 9d00263  | 0         |
| BBH | 9c00099 | um00166   | 1.00E-115 | um00166   | 9c00099  | 1.00E-110 |
| BBH | 9d00378 | um11624.2 | 1.00E-19  | um11624.2 | 9d00378  | 8.00E-29  |
| BBH | 9c00283 | um00505   | 0         | um00505   | 9c00283  | 0         |
| BBH | 9c00410 | um00758   | 0         | um00758   | 9c00410  | 0         |
| BBH | 9d00257 | um00532   | 5.00E-83  | um00532   | 9d00257  | 2.00E-96  |



|     |         |           |           |           |         |           |
|-----|---------|-----------|-----------|-----------|---------|-----------|
| BBH | 9c00104 | um00179   | 8.00E-78  | um00179   | 9c00104 | 8.00E-81  |
| BBH | 9c00392 | um00723   | 1.00E-102 | um00723   | 9c00392 | 6.00E-97  |
| BBH | 9d00003 | um00020   | 1.00E-106 | um00020   | 9d00003 | 1.00E-105 |
| BBH | 9d00277 | um00583   | 0         | um00583   | 9d00277 | 0         |
| BBH | 9d00221 | um10116   | 0         | um10116   | 9d00221 | 0         |
| BBH | 9d00270 | um00551   | 0         | um00551   | 9d00270 | 0         |
| BBH | 9c00119 | um00199   | 1.00E-170 | um00199   | 9c00119 | 1.00E-157 |
| BBH | 9d00179 | um00375   | 0         | um00375   | 9d00179 | 0         |
| BBH | 9d00063 | um00115   | 0         | um00115   | 9d00063 | 0         |
| BBH | 9c00426 | um00796   | 1.00E-109 | um00796   | 9c00426 | 1.00E-108 |
| BBH | 9c00343 | um00628   | 3.00E-20  | um00628   | 9c00343 | 8.00E-24  |
| BBH | 9d00125 | um00249   | 0         | um00249   | 9d00125 | 0         |
| BBH | 9d00068 | um10029   | 0         | um10029   | 9d00068 | 0         |
| BBH | 9c00270 | um00496   | 3.00E-17  | um00496   | 9c00270 | 3.00E-21  |
| BBH | 9d00085 | um00160   | 1.00E-135 | um00160   | 9d00085 | 1.00E-135 |
| NNN | 9c00274 | um00501   | 1.00E-66  | um00501   | 9c00275 | 5.00E-95  |
| BBH | 9d00243 | um11431   | 1.00E-27  | um11431   | 9d00243 | 9.00E-33  |
| BBH | 9d00079 | um00149   | 0         | um00149   | 9d00079 | 0         |
| BBH | 9c00373 | um11616   | 1.00E-34  | um11616   | 9c00373 | 9.00E-33  |
| BBH | 9c00352 | um00644.2 | 0         | um00644.2 | 9c00352 | 0         |
| BBH | 9c00127 | um00213   | 0         | um00213   | 9c00127 | 0         |
| BBH | 9d00113 | um00224   | 3.00E-70  | um00224   | 9d00113 | 3.00E-70  |
| BBH | 9d00108 | um00211   | 8.00E-46  | um00211   | 9d00108 | 2.00E-43  |
| BBH | 9d00008 | um00026   | 1.00E-109 | um00026   | 9d00008 | 1.00E-110 |
| BBH | 9d00206 | um00432   | 0         | um00432   | 9d00206 | 1.00E-174 |
| BBH | 9d00160 | um10101   | 8.00E-52  | um10101   | 9d00160 | 9.00E-44  |
| BBH | 9d00326 | um00663   | 0         | um00663   | 9d00326 | 0         |
| BBH | 9c00142 | um00242   | 0         | um00242   | 9c00142 | 0         |
| BBH | 9c00159 | um10086   | 0         | um10086   | 9c00159 | 0         |
| BBH | 9d00239 | um00492   | 1.00E-153 | um00492   | 9d00239 | 1.00E-145 |
| NNN | 9c00093 | um00154   | 0         |           |         |           |
| BBH | 9d00118 | um11427   | 2.00E-43  | um11427   | 9d00118 | 2.00E-41  |
| NNN | 9c00096 | um00161   | 2.00E-57  |           |         |           |
| BBH | 9c00339 | um00623   | 1.00E-101 | um00623   | 9c00339 | 9.00E-99  |
| BBH | 9c00281 | um12105   | 5.00E-52  | um12105   | 9c00281 | 2.00E-51  |
| BBH | 9d00380 | um00749   | 0         | um00749   | 9d00380 | 0         |
| BBH | 9d00078 | um10037   | 4.00E-20  | um10037   | 9d00078 | 2.00E-21  |
| BBH | 9d00311 | um00634   | 1.00E-117 | um00634   | 9d00311 | 1.00E-120 |
| BBH | 9c00268 | um00493   | 1.00E-107 | um00493   | 9c00268 | 1.00E-114 |
| BBH | 9c00345 | um11448   | 1.00E-115 | um11448   | 9c00345 | 1.00E-119 |
| BBH | 9d00244 | um11435   | 2.00E-75  | um11435   | 9d00244 | 2.00E-66  |
| BBH | 9d00099 | um00191   | 8.00E-48  | um00191   | 9d00099 | 2.00E-47  |
| BBH | 9c00330 | um00606   | 1.00E-115 | um00606   | 9c00330 | 1.00E-118 |
| BBH | 9c00185 | um00330   | 1.00E-134 | um00330   | 9c00185 | 1.00E-142 |
| BBH | 9d00120 | um00238   | 7.00E-88  | um00238   | 9d00120 | 4.00E-80  |
| BBH | 9d00193 | um11821   | 1.00E-105 | um11821   | 9d00193 | 1.00E-107 |
| BBH | 9d00017 | um00011   | 0         | um00011   | 9d00017 | 0         |
| BBH | 9c00040 | um00058   | 1.00E-135 | um00058   | 9c00040 | 1.00E-141 |
| BBH | 9c00253 | um00459   | 0         | um00459   | 9c00253 | 0         |
| NNN | 9d00184 | um00362   | 1.00E-172 |           |         |           |
| BBH | 9c00376 | um00688   | 1.00E-169 | um00688   | 9c00376 | 1.00E-167 |
| NNN | 9c00223 | um00395   | 1.00E-177 |           |         |           |
| BBH | 9c00164 | um00292   | 0         | um00292   | 9c00164 | 0         |
| BBH | 9c00233 | um00419   | 0         | um00419   | 9c00233 | 0         |
| BBH | 9d00271 | um10461   | 0         | um10461   | 9d00271 | 0         |
| BBH | 9d00143 | um00291   | 1.00E-112 | um00291   | 9d00143 | 1.00E-115 |
| BBH | 9d00286 | um10467   | 0         | um10467   | 9d00286 | 0         |
| BBH | 9c00354 | um00647   | 1.00E-165 | um00647   | 9c00354 | 1.00E-170 |
| BBH | 9d00049 | um00098   | 0         | um00098   | 9d00049 | 0         |
| BBH | 9c00295 | um00535   | 0         | um00535   | 9c00295 | 0         |
| BBH | 9d00001 | um06489   | 1.00E-112 | um06489   | 9d00001 | 1.00E-116 |
| BBH | 9c00321 | um10469   | 3.00E-95  | um10469   | 9c00321 | 3.00E-95  |

|     |         |           |           |           |         |           |
|-----|---------|-----------|-----------|-----------|---------|-----------|
| BBH | 9d00212 | um00439   | 4.00E-24  | um00439   | 9d00212 | 2.00E-24  |
| BBH | 9c00128 | um00215   | 0         | um00215   | 9c00128 | 0         |
| BBH | 9d00051 | um00099   | 1.00E-175 | um00099   | 9d00051 | 1.00E-180 |
| BBH | 9d00356 | um11167   | 9.00E-72  | um11167   | 9d00356 | 4.00E-69  |
| NNN | 9c00439 | um03416   | 5.00E-30  | um03416   | 8c00113 | 1.00E-134 |
| BBH | 9c00325 | um00595   | 0         | um00595   | 9c00325 | 0         |
| BBH | 9d00167 | um00347   | 0         | um00347   | 9d00167 | 0         |
| BBH | 9d00310 | um00632   | 2.00E-80  | um00632   | 9d00310 | 2.00E-80  |
| BBH | 9c00011 | um00013   | 1.00E-90  | um00013   | 9c00011 | 3.00E-88  |
| NNN | 9d00082 | um10040.2 | 1.00E-101 |           |         |           |
| BBH | 9c00420 | um00784.2 | 3.00E-75  | um00784.2 | 9c00420 | 4.00E-73  |
| BBH | 9d00290 | um00588   | 0         | um00588   | 9d00290 | 0         |
| BBH | 9d00374 | um00739   | 0         | um00739   | 9d00374 | 0         |
| BBH | 9d00383 | um00757   | 0         | um00757   | 9d00383 | 0         |
| BBH | 9c00243 | um00438   | 6.00E-35  | um00438   | 9c00243 | 7.00E-35  |
| BBH | 9d00002 | um10000   | 0         | um10000   | 9d00002 | 0         |
| BBH | 9c00134 | um00227   | 0         | um00227   | 9c00134 | 0         |
| BBH | 9d00285 | um00572   | 1.00E-147 | um00572   | 9d00285 | 1.00E-167 |
| BBH | 9d00397 | um00782   | 7.00E-46  | um00782   | 9d00397 | 8.00E-61  |
| BBH | 9c00070 | um10024   | 8.00E-52  | um10024   | 9c00070 | 4.00E-39  |
| BBH | 9c00306 | um10463   | 0         | um10463   | 9c00306 | 0         |
| BBH | 9c00329 | um00604   | 2.00E-47  | um00604   | 9c00329 | 2.00E-47  |
| BBH | 9d00227 | um00465   | 1.00E-159 | um00465   | 9d00227 | 1.00E-148 |
| BBH | 9d00035 | um10018   | 1.00E-150 | um10018   | 9d00035 | 1.00E-153 |
| BBH | 9c00054 | um00078   | 0         | um00078   | 9c00054 | 0         |
| BBH | 9c00001 | um06490   | 0         | um06490   | 9c00001 | 0         |
| BBH | 9d00137 | um00277   | 1.00E-136 | um00277   | 9d00137 | 1.00E-134 |
| BBH | 9c00360 | um00657   | 0         | um00657   | 9c00360 | 0         |
| BBH | 9c00313 | um00578   | 5.00E-29  | um00578   | 9c00313 | 3.00E-26  |
| BBH | 9d00144 | um00293   | 1.00E-173 | um00293   | 9d00144 | 1.00E-162 |
| BBH | 9c00302 | um15006   | 6.00E-26  | um15006   | 9c00302 | 3.00E-25  |
| BBH | 9c00318 | um00564   | 1.00E-100 | um00564   | 9c00318 | 1.00E-107 |
| BBH | 9c00219 | um00360   | 0         | um00360   | 9c00219 | 0         |
| BBH | 9d00073 | um00137   | 1.00E-168 | um00137   | 9d00073 | 1.00E-165 |
| BBH | 9c00174 | um10094   | 0         | um10094   | 9c00174 | 0         |
| NNN | 9d00130 | um00262   | 1.00E-167 |           |         |           |
| BBH | 9d00232 | um00478   | 5.00E-86  | um00478   | 9d00232 | 5.00E-94  |
| BBH | 9d00185 | um11349   | 1.00E-75  | um11349   | 9d00185 | 2.00E-93  |
| BBH | 9d00342 | um11620   | 6.00E-96  | um11620   | 9d00342 | 1.00E-96  |
| BBH | 9c00118 | um10051   | 3.00E-49  | um10051   | 9c00118 | 2.00E-49  |
| BBH | 9d00093 | um10047   | 0         | um10047   | 9d00093 | 0         |
| NNN | 9c00344 | um00630   | 0         |           |         |           |
| BBH | 9c00154 | um10965.2 | 1.00E-114 | um10965.2 | 9c00154 | 1.00E-111 |
| BBH | 9c00038 | um00054   | 1.00E-102 | um00054   | 9c00038 | 4.00E-96  |
| BBH | 9c00353 | um00645   | 0         | um00645   | 9c00353 | 0         |
| BBH | 9d00060 | um10027   | 0         | um10027   | 9d00060 | 0         |
| BBH | 9d00338 | um11617   | 1.00E-130 | um11617   | 9d00338 | 1.00E-129 |
| BBH | 9c00019 | um00006   | 0         | um00006   | 9c00019 | 0         |
| BBH | 9c00147 | um00254   | 2.00E-51  | um00254   | 9c00147 | 9.00E-47  |
| BBH | 9c00271 | um12104   | 0         | um12104   | 9c00271 | 0         |
| BBH | 9c00275 | um00501   | 7.00E-95  | um00501   | 9c00275 | 5.00E-95  |
| BBH | 9d00349 | um00699   | 3.00E-95  | um00699   | 9d00349 | 1.00E-109 |
| BBH | 9d00278 | um00584   | 0         | um00584   | 9d00278 | 0         |
| BBH | 9c00102 | um00182   | 0         | um00182   | 9c00102 | 0         |
| NNN | 9c00382 | um00700   | 1.00E-139 |           |         |           |
| BBH | 9d00294 | um00599   | 1.00E-175 | um00599   | 9d00294 | 1.00E-173 |
| BBH | 9c00368 | um00660.2 | 0         | um00660.2 | 9c00368 | 0         |
| BBH | 9c00288 | um11437   | 9.00E-89  | um11437   | 9c00288 | 7.00E-89  |
| BBH | 9c00381 | um00698.2 | 4.00E-80  | um00698.2 | 9c00381 | 2.00E-76  |
| BBH | 9d00364 | um00722.2 | 7.00E-82  | um00722.2 | 9d00364 | 1.00E-105 |
| BBH | 9c00064 | um00097   | 1.00E-178 | um00097   | 9c00064 | 0         |
| BBH | 9d00069 | um12082   | 1.00E-119 | um12082   | 9d00069 | 1.00E-118 |

|     |         |           |           |           |          |           |
|-----|---------|-----------|-----------|-----------|----------|-----------|
| BBH | 9d00156 | um00326   | 1.00E-68  | um00326   | 9d00156  | 2.00E-68  |
| BBH | 9d00220 | um00453   | 0         | um00453   | 9d00220  | 0         |
| BBH | 9d00377 | um11623   | 1.00E-140 | um11623   | 9d00377  | 1.00E-142 |
| BBH | 9d00262 | um00538   | 1.00E-67  | um00538   | 9d00262  | 2.00E-64  |
| BBH | 9d00404 | um15051   | 0         | um15051   | 9d00404  | 0         |
| BBH | 9d00173 | um00386   | 0         | um00386   | 9d00173  | 0         |
| NNN | 9c00195 | um11346   | 0         |           |          |           |
| BBH | 9d00042 | um10020   | 1.00E-165 | um10020   | 9d00042  | 6.00E-94  |
| BBH | 9c00263 | um10121   | 0         | um10121   | 9c00263  | 0         |
| BBH | 9c00201 | um00388   | 9.00E-94  | um00388   | 9c00201  | 3.00E-98  |
| BBH | 9d00110 | um11422   | 0         | um11422   | 9d00110  | 0         |
| BBH | 9d00121 | um00240   | 1.00E-159 | um00240   | 9d00121  | 1.00E-159 |
| BBH | 9c00048 | um00068   | 0         | um00068   | 9c00048  | 0         |
| BBH | 9c00252 | um12154   | 0         | um12154   | 9c00252  | 0         |
| BBH | 9d00211 | um12152   | 0         | um12152   | 9d00211  | 0         |
| BBH | 9c00232 | um10106   | 0         | um10106   | 9c00232  | 0         |
| BBH | 9d00301 | um10922   | 0         | um10922   | 9d00301  | 0         |
| BBH | 9c00188 | um00336   | 1.00E-30  | um00336   | 9c00188  | 2.00E-31  |
| BBH | 9c00292 | um00529   | 0         | um00529   | 9c00292  | 0         |
| BBH | 9d00281 | um12052   | 3.00E-90  | um12052   | 9d00281  | 1.00E-72  |
| BBH | 9c00400 | um00740   | 0         | um00740   | 9c00400  | 0         |
| BBH | 9c00165 | um10091   | 0         | um10091   | 9c00165  | 0         |
| BBH | 9d00152 | um00315   | 0         | um00315   | 9d00152  | 0         |
| BBH | 9c00086 | um00136.2 | 0         | um00136.2 | 9c00086  | 1.00E-180 |
| BBH | 9d00319 | um00658   | 1.00E-73  | um00658   | 9d00319  | 1.00E-73  |
| BBH | 9c00179 | um10097   | 1.00E-97  | um10097   | 9c00179  | 7.00E-96  |
| BBH | 9c00324 | um00594   | 0         | um00594   | 9c00324  | 0         |
| BBH | 9d00357 | um00711   | 1.00E-101 | um00711   | 9d00357  | 1.00E-101 |
| BBH | 9d00181 | um11354   | 5.00E-68  | um11354   | 9d00181  | 4.00E-66  |
| BBH | 9c00014 | um10944   | 1.00E-121 | um10944   | 9c00014  | 1.00E-120 |
| BBH | 9c00198 | um00393   | 0         | um00393   | 9c00198  | 0         |
| BBH | 9c00090 | um12089   | 1.00E-161 | um12089   | 9c00090  | 1.00E-167 |
| BBH | 9c00095 | um00159   | 1.00E-154 | um00159   | 9c00095  | 1.00E-140 |
| BBH | 9d00034 | um00072   | 1.00E-171 | um00072   | 9d00034  | 1.00E-180 |
| BBH | 9c00222 | um11348.2 | 0         | um11348.2 | 9c00222  | 0         |
| BBH | 9d00180 | um00372   | 0         | um00372   | 9d00180  | 0         |
| BBH | 9d00119 | um11428   | 0         | um11428   | 9d00119  | 0         |
| BBH | 9d00101 | um10052   | 0         | um10052   | 9d00101  | 0         |
| BBH | 9c00346 | um00635   | 0         | um00635   | 9c00346  | 0         |
| BBH | 9c00143 | um00245.2 | 1.00E-146 | um00245.2 | 9c00143  | 1.00E-139 |
| NNN | 9d00209 | um10114   | 6.00E-30  | um10114   | 9d00210  | 7.00E-31  |
| NNN | 9d00142 | um00286   | 4.00E-59  |           |          |           |
| BBH | 9d00223 | um00460   | 1.00E-136 | um00460   | 9d00223  | 1.00E-140 |
| NNN | 9c00391 | um03006   | 5.00E-18  | um03006   | 19c00058 | 1.00E-139 |
| BBH | 9c00262 | um00477   | 0         | um00477   | 9c00262  | 0         |
| BBH | 9c00120 | um00202   | 0         | um00202   | 9c00120  | 0         |
| BBH | 9d00376 | um00742   | 1.00E-113 | um00742   | 9d00376  | 1.00E-122 |
| BBH | 9d00083 | um00157   | 0         | um00157   | 9d00083  | 0         |
| BBH | 9d00135 | um00271   | 0         | um00271   | 9d00135  | 0         |
| BBH | 9c00156 | um00273   | 4.00E-32  | um00273   | 9c00156  | 3.00E-30  |
| BBH | 9c00088 | um00140   | 1.00E-133 | um00140   | 9c00088  | 1.00E-133 |
| BBH | 9d00075 | um00141   | 0         | um00141   | 9d00075  | 0         |
| BBH | 9c00129 | um00216   | 1.00E-165 | um00216   | 9c00129  | 1.00E-168 |
| BBH | 9c00272 | um11430   | 0         | um11430   | 9c00272  | 0         |
| BBH | 9d00396 | um00781   | 1.00E-22  | um00781   | 9d00396  | 8.00E-25  |
| BBH | 9d00272 | um10462   | 1.00E-133 | um10462   | 9d00272  | 1.00E-139 |
| BBH | 9c00317 | um00567   | 1.00E-55  | um00567   | 9c00317  | 8.00E-56  |
| BBH | 9c00106 | um00176   | 0         | um00176   | 9c00106  | 0         |
| BBH | 9d00314 | um00639   | 0         | um00639   | 9d00314  | 0         |
| BBH | 9d00405 | um00798   | 0         | um00798   | 9d00405  | 0         |
| BBH | 9d00265 | um00545   | 6.00E-85  | um00545   | 9d00265  | 2.00E-78  |
| NNN | 9d00415 | um01130   | 6.00E-25  | um01130   | 7d00207  | 1.00E-125 |

|     |         |           |           |           |         |           |
|-----|---------|-----------|-----------|-----------|---------|-----------|
| BBH | 9c00063 | um00095   | 1.00E-132 | um00095   | 9c00063 | 1.00E-132 |
| BBH | 9d00005 | um12080   | 0         | um12080   | 9d00005 | 0         |
| BBH | 9d00251 | um12106   | 0         | um12106   | 9d00251 | 0         |
| BBH | 9d00279 | um00581   | 0         | um00581   | 9d00279 | 0         |
| BBH | 9d00247 | um11434   | 1.00E-156 | um11434   | 9d00247 | 1.00E-153 |
| BBH | 9d00240 | um15088   | 0         | um15088   | 9d00240 | 0         |
| NNN | 9d00104 | um00205   | 7.00E-14  |           |         |           |
| BBH | 9d00170 | um00392   | 7.00E-51  | um00392   | 9d00170 | 7.00E-51  |
| BBH | 9d00065 | um00120   | 1.00E-140 | um00120   | 9d00065 | 1.00E-148 |
| BBH | 9d00100 | um00195   | 0         | um00195   | 9d00100 | 0         |
| BBH | 9c00350 | um11450   | 5.00E-82  | um11450   | 9c00350 | 2.00E-80  |
| BBH | 9c00181 | um12150   | 7.00E-87  | um12150   | 9c00181 | 2.00E-82  |
| BBH | 9c00250 | um00451   | 3.00E-97  | um00451   | 9c00250 | 3.00E-97  |
| BBH | 9d00231 | um00476   | 1.00E-141 | um00476   | 9d00231 | 1.00E-144 |
| BBH | 9d00098 | um00189   | 0         | um00189   | 9d00098 | 0         |
| BBH | 9c00037 | um00053   | 1.00E-61  | um00053   | 9c00037 | 2.00E-52  |
| BBH | 9c00216 | um00365   | 1.00E-44  | um00365   | 9c00216 | 3.00E-48  |
| BBH | 9c00377 | um00689   | 0         | um00689   | 9c00377 | 0         |
| BBH | 9c00383 | um00701.2 | 4.00E-15  | um00701.2 | 9c00383 | 2.00E-20  |
| NNN | 9c00051 | um10019   | 3.00E-93  | um10019   | 9c00052 | 1.00E-148 |
| BBH | 9d00305 | um10925   | 7.00E-76  | um10925   | 9d00305 | 2.00E-85  |
| BBH | 9d00238 | um00491   | 0         | um00491   | 9d00238 | 0         |
| NNN | 9d00072 | um10032   | 2.00E-79  |           |         |           |
| NNN | 9d00363 | um00721   | 0         |           |         |           |
| BBH | 9d00248 | um00508   | 4.00E-61  | um00508   | 9d00248 | 3.00E-61  |
| BBH | 9c00303 | um00548   | 0         | um00548   | 9c00303 | 0         |
| BBH | 9c00434 | um00812   | 0         | um00812   | 9c00434 | 0         |
| BBH | 9d00288 | um10465.2 | 0         | um10465.2 | 9d00288 | 0         |
| BBH | 9c00133 | um00225   | 6.00E-65  | um00225   | 9c00133 | 4.00E-62  |
| BBH | 9c00071 | um00108   | 1.00E-166 | um00108   | 9c00071 | 1.00E-167 |
| BBH | 9c00009 | um00017   | 1.00E-150 | um00017   | 9c00009 | 1.00E-150 |
| BBH | 9c00176 | um00316   | 0         | um00316   | 9c00176 | 0         |
| BBH | 9c00171 | um00304   | 0         | um00304   | 9c00171 | 0         |
| BBH | 9c00059 | um00087   | 1.00E-148 | um00087   | 9c00059 | 1.00E-142 |
| BBH | 9c00029 | um00043   | 0         | um00043   | 9c00029 | 0         |
| BBH | 9c00022 | um00012   | 1.00E-43  | um00012   | 9c00022 | 2.00E-55  |
| BBH | 9d00054 | um00102   | 1.00E-130 | um00102   | 9d00054 | 1.00E-127 |
| NNN | 9d00348 | um11833   | 0         |           |         |           |
| BBH | 9c00194 | um11345   | 1.00E-100 | um11345   | 9c00194 | 1.00E-100 |
| BBH | 9c00244 | um00440   | 1.00E-135 | um00440   | 9c00244 | 1.00E-138 |
| BBH | 9c00398 | um00734   | 4.00E-66  | um00734   | 9c00398 | 5.00E-63  |
| BBH | 9d00408 | um15030   | 5.00E-65  | um15030   | 9d00408 | 4.00E-59  |
| BBH | 9c00062 | um00094   | 1.00E-111 | um00094   | 9c00062 | 1.00E-111 |
| BBH | 9c00390 | um11171   | 0         | um11171   | 9c00390 | 0         |
| BBH | 9c00166 | um00295   | 1.00E-109 | um00295   | 9c00166 | 1.00E-111 |
| BBH | 9c00293 | um00533   | 0         | um00533   | 9c00293 | 0         |
| BBH | 9d00151 | um00311   | 0         | um00311   | 9d00151 | 0         |
| BBH | 9c00149 | um00259   | 0         | um00259   | 9c00149 | 0         |
| BBH | 9d00015 | um00007   | 1.00E-123 | um00007   | 9d00015 | 1.00E-129 |
| BBH | 9d00141 | um10088   | 0         | um10088   | 9d00141 | 0         |
| BBH | 9d00182 | um11353   | 0         | um11353   | 9d00182 | 0         |
| BBH | 9c00260 | um10120   | 0         | um10120   | 9c00260 | 0         |
| BBH | 9c00399 | um15019   | 0         | um15019   | 9c00399 | 0         |
| NNN | 9d00336 | um00679   | 0         |           |         |           |
| BBH | 9d00165 | um00342   | 1.00E-139 | um00342   | 9d00165 | 1.00E-125 |
| BBH | 9d00026 | um00045   | 0         | um00045   | 9d00026 | 0         |
| BBH | 9d00088 | um00167   | 0         | um00167   | 9d00088 | 0         |
| BBH | 9c00192 | um00343   | 0         | um00343   | 9c00192 | 0         |
| BBH | 9d00092 | um00181   | 0         | um00181   | 9d00092 | 0         |
| BBH | 9c00310 | um00585   | 0         | um00585   | 9c00310 | 0         |
| BBH | 9c00189 | um00338   | 0         | um00338   | 9c00189 | 0         |
| BBH | 9c00404 | um15024   | 0         | um15024   | 9c00404 | 0         |

|     |         |           |           |           |          |           |
|-----|---------|-----------|-----------|-----------|----------|-----------|
| BBH | 9d00410 | um00808   | 1.00E-159 | um00808   | 9d00410  | 1.00E-166 |
| NNN | 9d00045 | um02900   | 1.00E-114 | um02900   | 19d00128 | 0         |
| BBH | 9d00302 | um10923.2 | 0         | um10923.2 | 9d00302  | 0         |
| BBH | 9c00098 | um00164.2 | 1.00E-162 | um00164.2 | 9c00098  | 1.00E-170 |
| BBH | 9c00144 | um00247   | 0         | um00247   | 9c00144  | 0         |
| BBH | 9c00032 | um00047   | 9.00E-71  | um00047   | 9c00032  | 8.00E-71  |
| BBH | 9d00192 | um15058   | 0         | um15058   | 9d00192  | 0         |
| BBH | 9c00273 | um00499   | 1.00E-146 | um00499   | 9c00273  | 1.00E-140 |
| BBH | 9c00238 | um00429   | 0         | um00429   | 9c00238  | 0         |
| BBH | 9d00313 | um00638   | 1.00E-134 | um00638   | 9d00313  | 1.00E-140 |
| BBH | 9c00347 | um00636   | 9.00E-66  | um00636   | 9c00347  | 2.00E-68  |
| BBH | 9c00187 | um00334   | 0         | um00334   | 9c00187  | 1.00E-158 |
| BBH | 9c00282 | um00507   | 6.00E-80  | um00507   | 9c00282  | 7.00E-83  |
| BBH | 9d00222 | um00458   | 1.00E-151 | um00458   | 9d00222  | 1.00E-152 |
| BBH | 9c00337 | um00620   | 6.00E-55  | um00620   | 9c00337  | 6.00E-55  |
| BBH | 9c00323 | um00593   | 2.00E-27  | um00593   | 9c00323  | 2.00E-27  |
| BBH | 9c00023 | um00028   | 4.00E-99  | um00028   | 9c00023  | 4.00E-99  |
| BBH | 9c00117 | um00197   | 0         | um00197   | 9c00117  | 0         |
| BBH | 9d00333 | um00673   | 1.00E-97  | um00673   | 9d00333  | 1.00E-97  |
| BBH | 9d00158 | um00329   | 0         | um00329   | 9d00158  | 0         |
| NNN | 9d00229 | um10119   | 0         |           |          |           |
| BBH | 9d00106 | um00209.2 | 2.00E-20  | um00209.2 | 9d00106  | 1.00E-20  |
| BBH | 9d00037 | um00076   | 0         | um00076   | 9d00037  | 0         |
| BBH | 9d00199 | um00417   | 1.00E-89  | um00417   | 9d00199  | 2.00E-94  |
| BBH | 9c00047 | um00067   | 0         | um00067   | 9c00047  | 0         |
| BBH | 9d00210 | um10114   | 3.00E-27  | um10114   | 9d00210  | 7.00E-31  |
| BBH | 9d00097 | um00188   | 7.00E-73  | um00188   | 9d00097  | 1.00E-79  |
| BBH | 9d00417 | um04111   | 1.00E-117 | um04111   | 9d00417  | 1.00E-117 |
| BBH | 9c00221 | um00355   | 0         | um00355   | 9c00221  | 0         |
| BBH | 9c00083 | um00131   | 1.00E-177 | um00131   | 9c00083  | 1.00E-177 |
| BBH | 9c00351 | um11451   | 1.00E-129 | um11451   | 9c00351  | 1.00E-134 |
| BBH | 9d00091 | um00183   | 1.00E-147 | um00183   | 9d00091  | 1.00E-152 |
| BBH | 9c00186 | um00332   | 0         | um00332   | 9c00186  | 0         |
| BBH | 9c00202 | um00385   | 1.00E-130 | um00385   | 9c00202  | 1.00E-137 |
| NNN | 9d00241 | um15088   | 6.00E-87  | um15088   | 9d00240  | 0         |
| NNN | 9d00062 | um00700   | 8.00E-24  |           |          |           |
| BBH | 9c00246 | um00444   | 1.00E-144 | um00444   | 9c00246  | 1.00E-170 |
| BBH | 9d00150 | um00309   | 1.00E-136 | um00309   | 9d00150  | 1.00E-137 |
| BBH | 9d00409 | um00805   | 2.00E-80  | um00805   | 9d00409  | 1.00E-87  |
| BBH | 9d00334 | um00674   | 0         | um00674   | 9d00334  | 0         |
| BBH | 9d00242 | um00495   | 6.00E-55  | um00495   | 9d00242  | 5.00E-57  |
| BBH | 9c00079 | um00124   | 2.00E-48  | um00124   | 9c00079  | 2.00E-57  |
| NNN | 9d00280 | um00579   | 0         |           |          |           |
| BBH | 9d00368 | um00727   | 0         | um00727   | 9d00368  | 0         |
| NNN | 9d00171 | um00390   | 1.00E-65  |           |          |           |
| BBH | 9d00324 | um00666   | 1.00E-156 | um00666   | 9d00324  | 1.00E-156 |
| BBH | 9d00178 | um00376   | 0         | um00376   | 9d00178  | 0         |
| BBH | 9d00004 | um10004   | 1.00E-139 | um10004   | 9d00004  | 1.00E-147 |
| BBH | 9d00074 | um10033   | 0         | um10033   | 9d00074  | 0         |
| BBH | 9d00136 | um00272   | 1.00E-171 | um00272   | 9d00136  | 1.00E-162 |
| BBH | 9c00105 | um00177   | 0         | um00177   | 9c00105  | 0         |
| BBH | 9c00308 | um00561.2 | 1.00E-125 | um00561.2 | 9c00308  | 1.00E-123 |
| BBH | 9d00250 | um00515   | 0         | um00515   | 9d00250  | 0         |
| NNN | 9d00366 | um11779   | 3.00E-88  | um11779   | 2d00002  | 0         |
| BBH | 9d00264 | um00542   | 0         | um00542   | 9d00264  | 1.00E-178 |
| BBH | 9c00363 | um11456   | 0         | um11456   | 9c00363  | 1.00E-172 |
| BBH | 9d00306 | um00622   | 0         | um00622   | 9d00306  | 0         |
| BBH | 9d00395 | um00780   | 0         | um00780   | 9d00395  | 0         |
| BBH | 9d00402 | um10788.2 | 0         | um10788.2 | 9d00402  | 0         |
| BBH | 9d00394 | um00779   | 1.00E-119 | um00779   | 9d00394  | 1.00E-119 |
| BBH | 9c00116 | um00196   | 6.00E-94  | um00196   | 9c00116  | 3.00E-95  |
| BBH | 9c00433 | um00810   | 1.00E-163 | um00810   | 9c00433  | 1.00E-171 |

|     |         |           |           |           |         |           |
|-----|---------|-----------|-----------|-----------|---------|-----------|
| BBH | 9d00287 | um00568   | 1.00E-176 | um00568   | 9d00287 | 0         |
| BBH | 9d00389 | um00770   | 0         | um00770   | 9d00389 | 0         |
| BBH | 9c00072 | um00111   | 1.00E-111 | um00111   | 9c00072 | 1.00E-116 |
| BBH | 9d00057 | um10023   | 0         | um10023   | 9d00057 | 1.00E-159 |
| BBH | 9c00132 | um00222.2 | 1.00E-148 | um00222.2 | 9c00132 | 1.00E-164 |
| BBH | 9c00419 | um00778   | 1.00E-19  | um00778   | 9c00419 | 1.00E-20  |
| BBH | 9d00267 | um00547   | 1.00E-142 | um00547   | 9d00267 | 1.00E-142 |
| BBH | 9c00052 | um10019   | 1.00E-159 | um10019   | 9c00052 | 1.00E-148 |
| BBH | 9c00366 | um11830   | 3.00E-91  | um11830   | 9c00366 | 2.00E-89  |
| BBH | 9d00375 | um00741   | 0         | um00741   | 9d00375 | 0         |
| BBH | 9c00042 | um00059   | 1.00E-152 | um00059   | 9c00042 | 1.00E-145 |
| BBH | 9d00230 | um00473   | 0         | um00473   | 9d00230 | 0         |
| BBH | 9c00121 | um00203   | 1.00E-132 | um00203   | 9c00121 | 1.00E-145 |
| BBH | 9c00304 | um00553   | 0         | um00553   | 9c00304 | 0         |
| BBH | 9d00014 | um00003   | 1.00E-151 | um00003   | 9d00014 | 1.00E-151 |
| BBH | 9d00198 | um00412   | 1.00E-173 | um00412   | 9d00198 | 1.00E-171 |
| BBH | 9c00069 | um00105   | 0         | um00105   | 9c00069 | 0         |
| BBH | 9d00249 | um00506   | 1.00E-101 | um00506   | 9d00249 | 1.00E-102 |
| NNN | 9d00359 | um00715   | 2.00E-98  |           |         |           |
| NNN | 9c00217 | um11350.2 | 0         |           |         |           |
| BBH | 9c00068 | um00104   | 3.00E-54  | um00104   | 9c00068 | 4.00E-56  |
| BBH | 9c00208 | um15041   | 0         | um15041   | 9c00208 | 0         |
| BBH | 9d00218 | um00454   | 0         | um00454   | 9d00218 | 0         |
| BBH | 9c00428 | um11837   | 0         | um11837   | 9c00428 | 0         |
| BBH | 9c00173 | um00310   | 0         | um00310   | 9c00173 | 0         |
| BBH | 9c00031 | um00046   | 0         | um00046   | 9c00031 | 0         |
| BBH | 9c00007 | um12081   | 1.00E-97  | um12081   | 9c00007 | 3.00E-89  |
| BBH | 9c00115 | um00193   | 1.00E-159 | um00193   | 9c00115 | 1.00E-171 |
| BBH | 9d00096 | um10044   | 0         | um10044   | 9d00096 | 0         |
| BBH | 9c00075 | um00117   | 0         | um00117   | 9c00075 | 0         |
| BBH | 9d00036 | um00074   | 8.00E-60  | um00074   | 9d00036 | 9.00E-60  |
| BBH | 9c00057 | um00081   | 1.00E-60  | um00081   | 9c00057 | 4.00E-61  |
| BBH | 9d00237 | um00490   | 0         | um00490   | 9d00237 | 0         |
| BBH | 9c00384 | um00702   | 2.00E-29  | um00702   | 9c00384 | 2.00E-33  |
| BBH | 9d00303 | um00614   | 0         | um00614   | 9d00303 | 0         |
| BBH | 9d00346 | um00694.2 | 0         | um00694.2 | 9d00346 | 0         |
| BBH | 9d00390 | um00771   | 7.00E-75  | um00771   | 9d00390 | 8.00E-74  |
| BBH | 9c00326 | um00597   | 0         | um00597   | 9c00326 | 0         |
| BBH | 9d00103 | um00204   | 0         | um00204   | 9d00103 | 0         |
| BBH | 9d00388 | um00768   | 0         | um00768   | 9d00388 | 0         |
| BBH | 9c00436 | um00815   | 0         | um00815   | 9c00436 | 0         |
| BBH | 9d00134 | um00270   | 1.00E-106 | um00270   | 9d00134 | 1.00E-113 |
| BBH | 9c00073 | um00114   | 1.00E-113 | um00114   | 9c00073 | 1.00E-110 |
| BBH | 9c00027 | um00039   | 1.00E-103 | um00039   | 9c00027 | 2.00E-92  |
| NNN | 9c00414 | um11200   | 1.00E-110 |           |         |           |
| BBH | 9c00438 | um11634   | 0         | um11634   | 9c00438 | 0         |
| BBH | 9d00246 | um00510   | 0         | um00510   | 9d00246 | 0         |
| BBH | 9d00253 | um00522   | 1.00E-36  | um00522   | 9d00253 | 1.00E-41  |
| BBH | 9c00248 | um00448   | 9.00E-29  | um00448   | 9c00248 | 5.00E-33  |
| BBH | 9c00108 | um10046   | 0         | um10046   | 9c00108 | 0         |
| BBH | 9d00089 | um10049   | 0         | um10049   | 9d00089 | 0         |
| BBH | 9c00193 | um00344   | 1.00E-117 | um00344   | 9c00193 | 1.00E-109 |
| BBH | 9d00273 | um00557   | 0         | um00557   | 9d00273 | 0         |
| BBH | 9d00365 | um11173   | 7.00E-48  | um11173   | 9d00365 | 4.00E-49  |
| BBH | 9c00287 | um11436   | 1.00E-123 | um11436   | 9c00287 | 1.00E-125 |
| BBH | 9d00393 | um00777   | 0         | um00777   | 9d00393 | 0         |
| BBH | 9d00283 | um00574   | 0         | um00574   | 9d00283 | 0         |
| BBH | 9d00188 | um11608.2 | 2.00E-74  | um11608.2 | 9d00188 | 2.00E-74  |
| BBH | 9d00128 | um00258   | 1.00E-103 | um00258   | 9d00128 | 1.00E-111 |
| BBH | 9c00130 | um00218   | 0         | um00218   | 9c00130 | 0         |
| BBH | 9d00169 | um00394   | 3.00E-84  | um00394   | 9d00169 | 6.00E-81  |
| BBH | 9c00061 | um00092   | 1.00E-145 | um00092   | 9c00061 | 1.00E-145 |

|     |         |           |           |           |         |           |
|-----|---------|-----------|-----------|-----------|---------|-----------|
| BBH | 9d00080 | um10038   | 0         | um10038   | 9d00080 | 0         |
| BBH | 9c00162 | um00288   | 1.00E-170 | um00288   | 9c00162 | 1.00E-171 |
| BBH | 9d00298 | um15049   | 0         | um15049   | 9d00298 | 0         |
| BBH | 9c00050 | um12085   | 4.00E-59  | um12085   | 9c00050 | 2.00E-56  |
| BBH | 9d00176 | um00379   | 0         | um00379   | 9d00176 | 0         |
| BBH | 9d00191 | um00400   | 0         | um00400   | 9d00191 | 0         |
| BBH | 9c00278 | um00503   | 7.00E-31  | um00503   | 9c00278 | 3.00E-31  |
| BBH | 9d00360 | um11168   | 7.00E-40  | um11168   | 9d00360 | 4.00E-40  |
| BBH | 9c00357 | um00651   | 0         | um00651   | 9c00357 | 0         |
| BBH | 9d00067 | um00126   | 0         | um00126   | 9d00067 | 0         |
| NNN | 9c00122 | um00206.2 | 0         |           |         |           |
| NNN | 9d00316 | um11452   | 3.00E-24  |           |         |           |
| BBH | 9c00214 | um11352   | 0         | um11352   | 9c00214 | 0         |
| BBH | 9c00107 | um00175   | 1.00E-148 | um00175   | 9c00107 | 1.00E-153 |
| BBH | 9c00157 | um00274   | 1.00E-147 | um00274   | 9c00157 | 1.00E-144 |
| NNN | 9c00333 | um00612   | 0         |           |         |           |
| BBH | 9c00034 | um00050   | 1.00E-108 | um00050   | 9c00034 | 1.00E-110 |
| BBH | 9c00397 | um00738   | 6.00E-90  | um00738   | 9c00397 | 9.00E-85  |
| NNN | 9d00197 | um00410   | 1.00E-88  |           |         |           |
| BBH | 9d00224 | um00461   | 0         | um00461   | 9d00224 | 0         |
| NNN | 9c00041 | um00374   | 6.00E-60  | um00374   | 9c00209 | 0         |
| NNN | 9d00095 | um12091   | 1.00E-13  |           |         |           |
| BBH | 9c00016 | um00002   | 0         | um00002   | 9c00016 | 0         |
| BBH | 9c00335 | um00616   | 1.00E-84  | um00616   | 9c00335 | 1.00E-95  |
| BBH | 9d00297 | um00605   | 0         | um00605   | 9d00297 | 0         |
| BBH | 9d00190 | um00399   | 1.00E-139 | um00399   | 9d00190 | 1.00E-134 |
| BBH | 9d00028 | um00056   | 0         | um00056   | 9d00028 | 0         |
| BBH | 9d00351 | um00703   | 0         | um00703   | 9d00351 | 0         |
| BBH | 9c00284 | um11433   | 0         | um11433   | 9c00284 | 0         |
| BBH | 9c00199 | um00391.2 | 1.00E-118 | um00391.2 | 9c00199 | 1.00E-107 |
| BBH | 9c00211 | um00371   | 1.00E-116 | um00371   | 9c00211 | 1.00E-116 |
| BBH | 9d00201 | um10107   | 0         | um10107   | 9d00201 | 0         |
| BBH | 9c00247 | um02506   | 6.00E-74  | um02506   | 9c00247 | 3.00E-75  |
| BBH | 9c00237 | um00427   | 0         | um00427   | 9c00237 | 0         |
| BBH | 9c00020 | um00008   | 1.00E-145 | um00008   | 9c00020 | 1.00E-158 |
| BBH | 9c00267 | um11825   | 5.00E-45  | um11825   | 9c00267 | 4.00E-48  |
| BBH | 9d00163 | um11340   | 3.00E-85  | um11340   | 9d00163 | 1.00E-86  |
| BBH | 9c00378 | um00691   | 0         | um00691   | 9c00378 | 0         |
| BBH | 9d00323 | um00668   | 1.00E-179 | um00668   | 9d00323 | 0         |
| BBH | 9c00114 | um00192   | 1.00E-162 | um00192   | 9c00114 | 1.00E-166 |
| BBH | 9d00413 | um00813   | 0         | um00813   | 9d00413 | 0         |
| BBH | 9c00299 | um00539   | 0         | um00539   | 9c00299 | 0         |
| BBH | 9d00090 | um00184   | 1.00E-154 | um00184   | 9d00090 | 1.00E-150 |
| BBH | 9d00040 | um00084.2 | 0         | um00084.2 | 9d00040 | 0         |
| BBH | 9d00021 | um10009   | 0         | um10009   | 9d00021 | 0         |
| NNN | 9c00402 | um00745   | 9.00E-35  |           |         |           |
| BBH | 9d00148 | um00305   | 0         | um00305   | 9d00148 | 0         |
| BBH | 9c00254 | um00464   | 0         | um00464   | 9c00254 | 0         |
| BBH | 9d00153 | um00319   | 1.00E-134 | um00319   | 9d00153 | 1.00E-155 |
| NNN | 9d00086 | um00163   | 1.00E-102 |           |         |           |
| BBH | 9c00146 | um00251   | 1.00E-118 | um00251   | 9c00146 | 1.00E-112 |
| BBH | 9d00399 | um00786   | 1.00E-109 | um00786   | 9d00399 | 1.00E-107 |
| BBH | 9c00167 | um00298   | 0         | um00298   | 9c00167 | 0         |
| NNN | 9c00385 | um00702   | 7.00E-24  | um00702   | 9c00384 | 2.00E-33  |
| BBH | 9c00028 | um00040   | 1.00E-79  | um00040   | 9c00028 | 1.00E-79  |
| BBH | 9d00255 | um00526   | 0         | um00526   | 9d00255 | 0         |
| BBH | 9c00131 | um00219   | 0         | um00219   | 9c00131 | 0         |
| BBH | 9c00386 | um11165   | 0         | um11165   | 9c00386 | 0         |
| NNN | 9d00345 | um00693   | 0         |           |         |           |
| BBH | 9c00435 | um11631   | 1.00E-119 | um11631   | 9c00435 | 1.00E-137 |
| BBH | 9d00140 | um00282   | 0         | um00282   | 9d00140 | 0         |
| BBH | 9d00387 | um11201.2 | 0         | um11201.2 | 9d00387 | 0         |

|     |         |           |           |           |         |           |
|-----|---------|-----------|-----------|-----------|---------|-----------|
| BBH | 9c00039 | um00055   | 0         | um00055   | 9c00039 | 0         |
| BBH | 9c00178 | um00318   | 1.00E-146 | um00318   | 9c00178 | 1.00E-146 |
| BBH | 9d00012 | um10945   | 1.00E-159 | um10945   | 9d00012 | 1.00E-159 |
| BBH | 9c00076 | um00119   | 0         | um00119   | 9c00076 | 0         |
| BBH | 9d00217 | um00447   | 1.00E-47  | um00447   | 9d00217 | 2.00E-41  |
| BBH | 9d00266 | um10459   | 0         | um10459   | 9d00266 | 0         |
| BBH | 9c00215 | um00366   | 0         | um00366   | 9c00215 | 0         |
| BBH | 9c00021 | um00009   | 4.00E-95  | um00009   | 9c00021 | 1.00E-102 |
| BBH | 9d00126 | um00255   | 2.00E-86  | um00255   | 9d00126 | 1.00E-101 |
| BBH | 9c00429 | um00802   | 0         | um00802   | 9c00429 | 0         |
| NNN | 9d00289 | um00565   | 0         |           |         |           |
| BBH | 9c00074 | um00116   | 0         | um00116   | 9c00074 | 0         |
| BBH | 9c00058 | um00085   | 0         | um00085   | 9c00058 | 0         |
| NNN | 9c00067 | um03407   | 2.00E-28  | um03407   | 8d00115 | 0         |
| BBH | 9d00261 | um11442   | 0         | um11442   | 9d00261 | 0         |
| BBH | 9d00031 | um10015   | 3.00E-88  | um10015   | 9d00031 | 1.00E-107 |
| BBH | 9d00177 | um00378   | 1.00E-157 | um00378   | 9d00177 | 1.00E-177 |
| BBH | 9c00158 | um00275   | 0         | um00275   | 9c00158 | 0         |
| BBH | 9c00413 | um00763   | 0         | um00763   | 9c00413 | 0         |
| BBH | 9d00299 | um00607   | 2.00E-94  | um00607   | 9d00299 | 2.00E-91  |
| BBH | 9c00279 | um00513   | 0         | um00513   | 9c00279 | 0         |
| BBH | 9c00349 | um00637   | 1.00E-113 | um00637   | 9c00349 | 1.00E-108 |
| BBH | 9c00396 | um11172   | 0         | um11172   | 9c00396 | 0         |
| BBH | 9d00386 | um11199   | 1.00E-124 | um11199   | 9d00386 | 1.00E-129 |
| BBH | 9d00077 | um00144   | 1.00E-139 | um00144   | 9d00077 | 1.00E-132 |
| BBH | 9d00403 | um00792   | 2.00E-24  | um00792   | 9d00403 | 2.00E-18  |
| BBH | 9c00418 | um00775   | 0         | um00775   | 9c00418 | 0         |
| BBH | 9c00370 | um00675   | 0         | um00675   | 9c00370 | 0         |
| BBH | 9d00064 | um00118   | 0         | um00118   | 9d00064 | 0         |
| NNN | 9c00123 | um00208   | 0         |           |         |           |
| BBH | 9d00414 | um11632   | 0         | um11632   | 9d00414 | 0         |
| BBH | 9d00023 | um10010   | 1.00E-62  | um10010   | 9d00023 | 2.00E-71  |
| BBH | 9d00252 | um11438   | 7.00E-60  | um11438   | 9d00252 | 1.00E-69  |
| BBH | 9c00437 | um00817   | 0         | um00817   | 9c00437 | 0         |
| BBH | 9c00249 | um00450   | 0         | um00450   | 9c00249 | 0         |
| BBH | 9d00038 | um00077   | 1.00E-169 | um00077   | 9d00038 | 1.00E-168 |
| BBH | 9c00085 | um10031   | 1.00E-146 | um10031   | 9c00085 | 1.00E-146 |
| NNN | 9d00274 | um00560   | 0         |           |         |           |
| BBH | 9d00392 | um00774   | 1.00E-112 | um00774   | 9d00392 | 1.00E-112 |
| BBH | 9c00312 | um10468.2 | 1.00E-126 | um10468.2 | 9c00312 | 1.00E-124 |
| BBH | 9d00331 | um11612   | 3.00E-66  | um11612   | 9d00331 | 2.00E-74  |
| BBH | 9d00081 | um00153   | 4.00E-42  | um00153   | 9d00081 | 4.00E-49  |
| BBH | 9d00189 | um11610   | 1.00E-143 | um11610   | 9d00189 | 1.00E-143 |
| BBH | 9d00129 | um10961   | 3.00E-80  | um10961   | 9d00129 | 3.00E-80  |
| BBH | 9c00161 | um10089.2 | 1.00E-128 | um10089.2 | 9c00161 | 1.00E-124 |
| BBH | 9c00240 | um10113   | 1.00E-152 | um10113   | 9c00240 | 1.00E-140 |
| BBH | 9d00352 | um11164   | 2.00E-73  | um11164   | 9d00352 | 3.00E-73  |
| BBH | 9c00406 | um00750   | 1.00E-151 | um00750   | 9c00406 | 1.00E-161 |
| BBH | 9d00300 | um00608   | 2.00E-62  | um00608   | 9d00300 | 2.00E-62  |
| BBH | 9c00239 | um00430   | 0         | um00430   | 9c00239 | 0         |
| BBH | 9c00285 | um00516   | 0         | um00516   | 9c00285 | 0         |
| BBH | 9c00170 | um00302   | 1.00E-101 | um00302   | 9c00170 | 4.00E-98  |
| BBH | 9d00339 | um00684   | 1.00E-163 | um00684   | 9d00339 | 0         |
| NNN | 9c00196 | um00350   | 0         |           |         |           |
| BBH | 9c00150 | um10963   | 8.00E-85  | um10963   | 9c00150 | 1.00E-83  |
| BBH | 9d00159 | um10100   | 3.00E-91  | um10100   | 9d00159 | 3.00E-91  |
| BBH | 9c00180 | um00322   | 0         | um00322   | 9c00180 | 0         |
| BBH | 9c00236 | um10108   | 1.00E-112 | um10108   | 9c00236 | 1.00E-115 |
| BBH | 9c00220 | um00357   | 0         | um00357   | 9c00220 | 0         |
| BBH | 9d00055 | um00103   | 0         | um00103   | 9d00055 | 0         |
| BBH | 9c00015 | um10946   | 0         | um10946   | 9c00015 | 0         |
| BBH | 9d00117 | um11426   | 1.00E-165 | um11426   | 9d00117 | 1.00E-162 |



|     |         |           |           |           |          |           |
|-----|---------|-----------|-----------|-----------|----------|-----------|
| BBH | 9c00336 | um10924   | 0         | um10924   | 9c00336  | 0         |
| BBH | 9c00296 | um00536   | 1.00E-108 | um00536   | 9c00296  | 1.00E-104 |
| BBH | 9c00209 | um00374   | 0         | um00374   | 9c00209  | 0         |
| BBH | 9c00265 | um00483   | 2.00E-32  | um00483   | 9c00265  | 2.00E-30  |
| BBH | 9c00033 | um00049   | 6.00E-44  | um00049   | 9c00033  | 5.00E-46  |
| BBH | 9c00097 | um10041.2 | 3.00E-85  | um10041.2 | 9c00097  | 3.00E-70  |
| BBH | 9d00094 | um00174   | 0         | um00174   | 9d00094  | 0         |
| BBH | 9d00029 | um00057   | 1.00E-72  | um00057   | 9d00029  | 3.00E-72  |
| BBH | 9c00155 | um10966   | 0         | um10966   | 9c00155  | 0         |
| BBH | 9d00105 | um00207.2 | 1.00E-175 | um00207.2 | 9d00105  | 0         |
| BBH | 9d00200 | um00418   | 0         | um00418   | 9d00200  | 0         |
| BBH | 9c00230 | um10104   | 1.00E-125 | um10104   | 9c00230  | 1.00E-127 |
| BBH | 9c00060 | um00089   | 1.00E-109 | um00089   | 9c00060  | 1.00E-104 |
| BBH | 9d00282 | um00576   | 2.00E-54  | um00576   | 9d00282  | 1.00E-56  |
| BBH | 9d00216 | um00446   | 0         | um00446   | 9d00216  | 0         |
| BBH | 9d00030 | um00061   | 0         | um00061   | 9d00030  | 0         |
| BBH | 9d00332 | um00672   | 1.00E-160 | um00672   | 9d00332  | 1.00E-171 |
| BBH | 9c00365 | um00667   | 2.00E-93  | um00667   | 9c00365  | 1.00E-93  |
| BBH | 9c00049 | um10017   | 1.00E-175 | um10017   | 9c00049  | 1.00E-175 |
| BBH | 9c00423 | um00789   | 0         | um00789   | 9c00423  | 0         |
| BBH | 9c00379 | um00692   | 2.00E-59  | um00692   | 9c00379  | 3.00E-62  |
| BBH | 9c00229 | um00411.2 | 1.00E-143 | um00411.2 | 9c00229  | 1.00E-137 |
| BBH | 9d00164 | um11341   | 1.00E-170 | um11341   | 9d00164  | 1.00E-168 |
| BBH | 9c00430 | um11627   | 1.00E-67  | um11627   | 9c00430  | 2.00E-67  |
| BBH | 9d00147 | um12149   | 3.00E-59  | um12149   | 9d00147  | 2.00E-50  |
| BBH | 9c00200 | um00389   | 0         | um00389   | 9c00200  | 0         |
| BBH | 9c00168 | um00299   | 0         | um00299   | 9c00168  | 0         |
| BBH | 9c00087 | um00138   | 0         | um00138   | 9c00087  | 0         |
| BBH | 9d00043 | um00091   | 1.00E-107 | um00091   | 9d00043  | 2.00E-95  |
| BBH | 9d00304 | um00617   | 1.00E-138 | um00617   | 9d00304  | 1.00E-139 |
| BBH | 9d00013 | um00001   | 1.00E-124 | um00001   | 9d00013  | 1.00E-124 |
| BBH | 9d00245 | um00512   | 6.00E-78  | um00512   | 9d00245  | 7.00E-78  |
| BBH | 9d00087 | um10042   | 0         | um10042   | 9d00087  | 0         |
| BBH | 9d00025 | um00042   | 0         | um00042   | 9d00025  | 0         |
| BBH | 9d00369 | um12110   | 1.00E-114 | um12110   | 9d00369  | 1.00E-118 |
| BBH | 9d00168 | um00349.2 | 2.00E-38  | um00349.2 | 9d00168  | 9.00E-41  |
| BBH | 9c00409 | um00756   | 0         | um00756   | 9c00409  | 0         |
| BBH | 9c00137 | um00233   | 1.00E-45  | um00233   | 9c00137  | 8.00E-45  |
| BBH | 9d00254 | um11439   | 8.00E-59  | um11439   | 9d00254  | 1.00E-113 |
| BBH | 9d00400 | um10787   | 0         | um10787   | 9d00400  | 0         |
| BBH | 9c00101 | um10048   | 6.00E-30  | um10048   | 9c00101  | 6.00E-30  |
| NNN | 9c00124 | um00210   | 3.00E-55  |           |          |           |
| BBH | 9d00275 | um00563   | 3.00E-64  | um00563   | 9d00275  | 3.00E-69  |
| BBH | 9c00421 | um00785   | 0         | um00785   | 9c00421  | 0         |
| BBH | 9d00391 | um11202   | 7.00E-15  | um11202   | 9d00391  | 3.00E-15  |
| BBH | 9c00289 | um00525   | 1.00E-120 | um00525   | 9c00289  | 1.00E-120 |
| BBH | 9d00039 | um00082   | 1.00E-44  | um00082   | 9d00039  | 1.00E-68  |
| BBH | 9d00370 | um00737   | 0         | um00737   | 9d00370  | 0         |
| NNN | 9c00358 | um11827   | 1.00E-106 |           |          |           |
| BBH | 9d00318 | um11453   | 3.00E-66  | um11453   | 9d00318  | 2.00E-67  |
| BBH | 9c00355 | um11455   | 0         | um11455   | 9c00355  | 0         |
| BBH | 9d00059 | um10025   | 0         | um10025   | 9d00059  | 0         |
| BBH | 9c00005 | um10002   | 0         | um10002   | 9c00005  | 0         |
| BBH | 9c00148 | um12148   | 0         | um12148   | 9c00148  | 0         |
| BBH | 9d00362 | um00719   | 2.00E-41  | um00719   | 9d00362  | 1.00E-45  |
| BBH | 9c00417 | um00773   | 1.00E-58  | um00773   | 9c00417  | 2.00E-58  |
| BBH | 9d00385 | um11198   | 0         | um11198   | 9d00385  | 0         |
| BBH | 9c00055 | um00079   | 1.00E-161 | um00079   | 9c00055  | 1.00E-161 |
| BBH | 9c00026 | um00037   | 0         | um00037   | 9c00026  | 0         |
| NNN | 9c00066 | um04886   | 3.00E-21  | um04886   | 26d00001 | 0         |
| BBH | 9d00127 | um00256   | 1.00E-129 | um00256   | 9d00127  | 1.00E-129 |
| BBH | 9c00190 | um00340   | 1.00E-112 | um00340   | 9c00190  | 1.00E-130 |

|     |         |           |           |           |         |           |
|-----|---------|-----------|-----------|-----------|---------|-----------|
| BBH | 9c00204 | um11604   | 0         | um11604   | 9c00204 | 0         |
| BBH | 9c00002 | um06480   | 1.00E-27  | um06480   | 9c00002 | 4.00E-48  |
| BBH | 9c00113 | um10050   | 3.00E-33  | um10050   | 9c00113 | 4.00E-26  |
| BBH | 9d00024 | um00038   | 1.00E-142 | um00038   | 9d00024 | 1.00E-139 |
| BBH | 9c00077 | um00122   | 0         | um00122   | 9c00077 | 0         |
| BBH | 9c00311 | um00582   | 0         | um00582   | 9c00311 | 0         |
| BBH | 9d00235 | um15059   | 0         | um15059   | 9d00235 | 0         |
| BBH | 9c00387 | um00710   | 0         | um00710   | 9c00387 | 0         |
| BBH | 9d00131 | um00263.2 | 3.00E-74  | um00263.2 | 9d00131 | 7.00E-74  |
| BBH | 9d00329 | um00670   | 0         | um00670   | 9d00329 | 0         |
| NNN | 9c00316 | um00569   | 0         |           |         |           |
| BBH | 9c00269 | um00494   | 4.00E-79  | um00494   | 9c00269 | 1.00E-100 |
| BBH | 9d00076 | um10035   | 1.00E-23  | um10035   | 9d00076 | 1.00E-23  |
| BBH | 9c00431 | um12111   | 1.00E-105 | um12111   | 9c00431 | 1.00E-103 |
| BBH | 9d00308 | um15009   | 0         | um15009   | 9d00308 | 0         |
| BBH | 9d00371 | um00736   | 0         | um00736   | 9d00371 | 0         |
| BBH | 9d00344 | um15016   | 0         | um15016   | 9d00344 | 0         |
| BBH | 9c00328 | um00602   | 0         | um00602   | 9c00328 | 0         |
| NNN | 9d00146 | um00300   | 0         |           |         |           |
| BBH | 9d00018 | um00029   | 1.00E-174 | um00029   | 9d00018 | 1.00E-178 |
| BBH | 9d00234 | um00482   | 5.00E-16  | um00482   | 9d00234 | 6.00E-16  |
| BBH | 9d00315 | um11449   | 0         | um11449   | 9d00315 | 0         |
| BBH | 9c00231 | um10105   | 0         | um10105   | 9c00231 | 0         |
| BBH | 9d00341 | um00687   | 0         | um00687   | 9d00341 | 0         |
| BBH | 9c00408 | um00755   | 1.00E-120 | um00755   | 9c00408 | 1.00E-129 |
| BBH | 9c00082 | um10030   | 1.00E-108 | um10030   | 9c00082 | 1.00E-106 |
| BBH | 9d00291 | um00589   | 6.00E-93  | um00589   | 9d00291 | 7.00E-88  |
| BBH | 9c00025 | um00036   | 7.00E-67  | um00036   | 9c00025 | 1.00E-66  |
| BBH | 9d00007 | um10007   | 1.00E-130 | um10007   | 9d00007 | 1.00E-141 |
| BBH | 9d00155 | um10098   | 0         | um10098   | 9d00155 | 0         |
| BBH | 9d00161 | um00333   | 0         | um00333   | 9d00161 | 0         |
| BBH | 9c00320 | um00590   | 5.00E-16  | um00590   | 9c00320 | 4.00E-13  |
| BBH | 9c00371 | um11613.2 | 0         | um11613.2 | 9c00371 | 1.00E-178 |
| BBH | 9d00337 | um11615.2 | 2.00E-73  | um11615.2 | 9d00337 | 1.00E-72  |
| BBH | 9c00257 | um00468   | 0         | um00468   | 9c00257 | 0         |
| BBH | 9d00226 | um00463   | 1.00E-157 | um00463   | 9d00226 | 1.00E-159 |
| BBH | 9c00169 | um10092.2 | 0         | um10092.2 | 9c00169 | 0         |
| BBH | 9d00295 | um00601   | 1.00E-135 | um00601   | 9d00295 | 1.00E-141 |
| BBH | 9d00196 | um11822   | 4.00E-66  | um11822   | 9d00196 | 8.00E-55  |
| BBH | 9c00206 | um00380   | 1.00E-170 | um00380   | 9c00206 | 1.00E-170 |
| BBH | 9c00044 | um00064   | 1.00E-149 | um00064   | 9c00044 | 1.00E-150 |
| BBH | 9d00114 | um00226   | 1.00E-122 | um00226   | 9d00114 | 1.00E-113 |
| BBH | 9c00331 | um00609   | 0         | um00609   | 9c00331 | 0         |
| BBH | 9c00175 | um10095   | 0         | um10095   | 9c00175 | 0         |
| BBH | 9d00174 | um11606   | 4.00E-54  | um11606   | 9d00174 | 2.00E-56  |
| BBH | 9c00395 | um00728   | 1.00E-130 | um00728   | 9c00395 | 1.00E-139 |
| BBH | 9c00018 | um00005   | 0         | um00005   | 9c00018 | 0         |
| BBH | 9d00259 | um00534   | 1.00E-167 | um00534   | 9d00259 | 5.00E-95  |
| BBH | 9c00151 | um00264   | 1.00E-124 | um00264   | 9c00151 | 1.00E-157 |
| BBH | 9d00328 | um00652   | 0         | um00652   | 9d00328 | 0         |
| NNN | 9d00353 | um00706   | 1.00E-171 |           |         |           |
| BBH | 9d00186 | um00356   | 0         | um00356   | 9d00186 | 0         |
| NNN | 9c00197 | um11347.2 | 0         |           |         |           |
| BBH | 9c00160 | um10087.2 | 1.00E-121 | um10087.2 | 9c00160 | 1.00E-114 |
| BBH | 9d00205 | um10112   | 9.00E-70  | um10112   | 9d00205 | 4.00E-71  |
| BBH | 9d00033 | um00071   | 0         | um00071   | 9d00033 | 0         |
| BBH | 9c00369 | um00671   | 1.00E-143 | um00671   | 9c00369 | 1.00E-127 |
| BBH | 9c00092 | um00152   | 1.00E-133 | um00152   | 9c00092 | 1.00E-135 |
| BBH | 9c00235 | um00424   | 0         | um00424   | 9c00235 | 0         |
| BBH | 9c00359 | um15012   | 0         | um15012   | 9c00359 | 0         |
| BBH | 9d00276 | um12146   | 1.00E-63  | um12146   | 9d00276 | 1.00E-64  |
| BBH | 9d00154 | um00321   | 0         | um00321   | 9d00154 | 0         |

|     |         |           |           |           |         |           |
|-----|---------|-----------|-----------|-----------|---------|-----------|
| BBH | 9d00124 | um10956   | 3.00E-15  | um10956   | 9d00124 | 4.00E-15  |
| BBH | 9d00361 | um11170   | 0         | um11170   | 9d00361 | 0         |
| BBH | 9c00259 | um12155.2 | 0         | um12155.2 | 9c00259 | 0         |
| BBH | 9d00175 | um11605   | 1.00E-128 | um11605   | 9d00175 | 1.00E-130 |
| BBH | 9c00152 | um00265   | 1.00E-88  | um00265   | 9c00152 | 1.00E-81  |
| BBH | 9d00066 | um10028   | 1.00E-37  | um10028   | 9d00066 | 9.00E-29  |
| BBH | 9c00411 | um11197   | 1.00E-177 | um11197   | 9c00411 | 1.00E-180 |
| BBH | 9c00080 | um00127   | 0         | um00127   | 9c00080 | 0         |
| BBH | 9c00046 | um10014   | 3.00E-66  | um10014   | 9c00046 | 2.00E-67  |
| BBH | 9c00401 | um00743   | 0         | um00743   | 9c00401 | 0         |
| BBH | 9c00100 | um00168   | 0         | um00168   | 9c00100 | 0         |
| BBH | 9d00061 | um00113   | 0         | um00113   | 9d00061 | 0         |
| BBH | 9c00286 | um00518   | 0         | um00518   | 9c00286 | 0         |
| BBH | 9c00010 | um15048   | 0         | um15048   | 9c00010 | 0         |
| NNN | 9d00401 | um00790   | 0         |           |         |           |
| BBH | 9c00172 | um00308   | 1.00E-145 | um00308   | 9c00172 | 1.00E-135 |
| BBH | 9c00125 | um12147.2 | 7.00E-85  | um12147.2 | 9c00125 | 7.00E-85  |
| BBH | 9d00020 | um00032   | 2.00E-13  | um00032   | 9d00020 | 5.00E-14  |
| BBH | 9d00354 | um11166.2 | 0         | um11166.2 | 9d00354 | 0         |
| BBH | 9d00053 | um00101   | 0         | um00101   | 9d00053 | 0         |
| BBH | 9c00422 | um00788   | 1.00E-157 | um00788   | 9c00422 | 1.00E-162 |
| BBH | 9d00343 | um04309   | 1.00E-133 | um04309   | 9d00343 | 1.00E-126 |
| BBH | 9c00315 | um10466.2 | 1.00E-139 | um10466.2 | 9c00315 | 1.00E-139 |
| BBH | 9d00372 | um00735   | 1.00E-128 | um00735   | 9d00372 | 1.00E-142 |
| BBH | 9d00102 | um10053   | 5.00E-90  | um10053   | 9d00102 | 2.00E-80  |
| BBH | 9c00210 | um11355   | 2.00E-21  | um11355   | 9c00210 | 2.00E-21  |
| NNN | 9d00132 | um10964   | 1.00E-160 |           |         |           |
| BBH | 9d00309 | um11447.2 | 0         | um11447.2 | 9d00309 | 0         |
| BBH | 9c00327 | um12108   | 1.00E-115 | um12108   | 9c00327 | 1.00E-113 |
| BBH | 9c00213 | um00369   | 9.00E-57  | um00369   | 9c00213 | 4.00E-61  |
| BBH | 9c00388 | um00712   | 0         | um00712   | 9c00388 | 0         |
| BBH | 9c00136 | um11425   | 1.00E-171 | um11425   | 9c00136 | 0         |
| BBH | 9c00264 | um00481   | 5.00E-89  | um00481   | 9c00264 | 1.00E-81  |
| BBH | 9d00382 | um00754   | 2.00E-22  | um00754   | 9d00382 | 6.00E-20  |
| BBH | 9d00317 | um00646   | 1.00E-166 | um00646   | 9d00317 | 1.00E-149 |
| BBH | 9c00427 | um00797   | 1.00E-148 | um00797   | 9c00427 | 1.00E-160 |
| BBH | 9c00300 | um11445   | 1.00E-30  | um11445   | 9c00300 | 3.00E-31  |
| BBH | 9d00019 | um00031   | 1.00E-155 | um00031   | 9d00019 | 1.00E-156 |
| BBH | 9c00241 | um00435   | 1.00E-148 | um00435   | 9c00241 | 1.00E-147 |
| BBH | 9c00191 | um11343.2 | 1.00E-65  | um11343.2 | 9c00191 | 1.00E-61  |
| NNN | 9c00065 | um03403.2 | 2.00E-28  | um03403.2 | 8d00113 | 0         |
| BBH | 9c00309 | um00586   | 3.00E-40  | um00586   | 9c00309 | 2.00E-34  |
| BBH | 9c00078 | um00123   | 0         | um00123   | 9c00078 | 0         |
| BBH | 9c00109 | um00172   | 1.00E-137 | um00172   | 9c00109 | 1.00E-144 |
| BBH | 9c00003 | um10001   | 2.00E-72  | um10001   | 9c00003 | 1.00E-69  |
| BBH | 9d00268 | um00549   | 0         | um00549   | 9d00268 | 0         |
| BBH | 9d00320 | um00654   | 4.00E-94  | um00654   | 9d00320 | 2.00E-91  |
| BBH | 9d00203 | um10110   | 2.00E-37  | um10110   | 9d00203 | 2.00E-37  |
| BBH | 9d00284 | um00573   | 2.00E-38  | um00573   | 9d00284 | 3.00E-44  |
| BBH | 9d00058 | um00109   | 0         | um00109   | 9d00058 | 0         |
| BBH | 9c00056 | um00080   | 0         | um00080   | 9c00056 | 0         |
| BBH | 9d00292 | um00596   | 1.00E-173 | um00596   | 9d00292 | 1.00E-161 |
| BBH | 9c00374 | um11618   | 2.00E-98  | um11618   | 9c00374 | 6.00E-95  |
| BBH | 9c00340 | um00624   | 1.00E-151 | um00624   | 9c00340 | 1.00E-145 |
| BBH | 9c00342 | um10929   | 4.00E-33  | um10929   | 9c00342 | 2.00E-33  |
| BBH | 9c00356 | um00650   | 0         | um00650   | 9c00356 | 0         |
| BBH | 9c00416 | um00769   | 4.00E-79  | um00769   | 9c00416 | 3.00E-87  |
| BBH | 9c00145 | um10958   | 0         | um10958   | 9c00145 | 0         |
| BBH | 9d00202 | um00423   | 2.00E-89  | um00423   | 9d00202 | 7.00E-98  |
| BBH | 9c00205 | um00381   | 0         | um00381   | 9c00205 | 0         |
| BBH | 9d00052 | um10022   | 2.00E-23  | um10022   | 9d00052 | 1.00E-32  |
| BBH | 9c00207 | um05082   | 0         | um05082   | 9c00207 | 0         |

|     |          |           |           |           |          |           |
|-----|----------|-----------|-----------|-----------|----------|-----------|
| BBH | 9d00022  | um00034   | 0         | um00034   | 9d00022  | 0         |
| BBH | 9c00372  | um00678   | 0         | um00678   | 9c00372  | 0         |
| BBH | 9c00256  | um00467   | 0         | um00467   | 9c00256  | 0         |
| BBH | 9d00204  | um00428   | 1.00E-157 | um00428   | 9d00204  | 1.00E-157 |
| BBH | 9c00227  | um11824   | 0         | um11824   | 9c00227  | 0         |
| BBH | 9c00126  | um00212   | 1.00E-175 | um00212   | 9c00126  | 0         |
| BBH | 9d00321  | um00669   | 1.00E-139 | um00669   | 9d00321  | 1.00E-125 |
| BBH | 9d00412  | um00811   | 1.00E-118 | um00811   | 9d00412  | 1.00E-121 |
| BBH | 9d00006  | um10005   | 0         | um10005   | 9d00006  | 0         |
| BBH | 9d00084  | um12090   | 1.00E-147 | um12090   | 9d00084  | 1.00E-150 |
| BBH | 9d00406  | um00800   | 0         | um00800   | 9d00406  | 0         |
| BBH | 9d00296  | um00603   | 6.00E-72  | um00603   | 9d00296  | 1.00E-73  |
| BBH | 9d00225  | um10117   | 0         | um10117   | 9d00225  | 0         |
| BBH | 9d00145  | um00297   | 1.00E-158 | um00297   | 9d00145  | 1.00E-164 |
| BBH | 9d00032  | um10016   | 1.00E-168 | um10016   | 9d00032  | 0         |
| BBH | 9d00162  | um10102   | 0         | um10102   | 9d00162  | 0         |
| BBH | 9d00187  | um00354   | 1.00E-153 | um00354   | 9d00187  | 1.00E-143 |
| BBH | 9d00041  | um12086   | 4.00E-93  | um12086   | 9d00041  | 4.00E-96  |
| BBH | 9d00214  | um00443   | 1.00E-102 | um00443   | 9d00214  | 1.00E-103 |
| BBH | 9c00212  | um00370   | 0         | um00370   | 9c00212  | 0         |
| BBH | 9c00407  | um00751   | 0         | um00751   | 9c00407  | 0         |
| BBH | 9c00111  | um00169   | 1.00E-124 | um00169   | 9c00111  | 1.00E-133 |
| BBH | 9c00089  | um10034   | 7.00E-22  | um10034   | 9c00089  | 6.00E-22  |
| BBH | 9d00327  | um11828   | 0         | um11828   | 9d00327  | 0         |
| NNN | 9d00258  | um00530   | 1.00E-111 |           |          |           |
| BBH | 9c00140  | um00239   | 0         | um00239   | 9c00140  | 0         |
| BBH | 9c00139  | um00235   | 0         | um00235   | 9c00139  | 0         |
| BBH | 9c00182  | um00325   | 0         | um00325   | 9c00182  | 0         |
| BBH | 9c00091  | um10036   | 0         | um10036   | 9c00091  | 0         |
| BBH | 9c00234  | um00422   | 1.00E-123 | um00422   | 9c00234  | 1.00E-119 |
| BBH | 9c00332  | um00610   | 2.00E-73  | um00610   | 9c00332  | 4.00E-72  |
| BBH | 9c00036  | um10013.2 | 0         | um10013.2 | 9c00036  | 0         |
| BBH | 9c00225  | um00403   | 1.00E-175 | um00403   | 9c00225  | 1.00E-176 |
| BBH | 9c00266  | um00486   | 0         | um00486   | 9c00266  | 0         |
| BBH | 9d00071  | um00132   | 2.00E-62  | um00132   | 9d00071  | 5.00E-63  |
| BBH | 9d00195  | um00406   | 7.00E-45  | um00406   | 9d00195  | 3.00E-34  |
| BBH | 9c00043  | um00063   | 1.00E-64  | um00063   | 9c00043  | 2.00E-31  |
| BBH | 9c00334  | um00615   | 6.00E-95  | um00615   | 9c00334  | 6.00E-95  |
| NNN | 9d00139  | um00280   | 1.00E-159 |           |          |           |
| BBH | 9d00122  | um10955   | 5.00E-43  | um10955   | 9d00122  | 5.00E-43  |
| BBH | 9c00017  | um12014   | 1.00E-172 | um12014   | 9c00017  | 1.00E-172 |
| BBH | 9c00394  | um00729   | 1.00E-177 | um00729   | 9c00394  | 1.00E-177 |
| BBH | 9d00115  | um00229   | 2.00E-40  | um00229   | 9d00115  | 4.00E-41  |
| BBH | 10d00113 | um03656   | 1.00E-72  | um03656   | 10d00113 | 2.00E-71  |
| BBH | 10c00054 | um03743.2 | 1.00E-171 | um03743.2 | 10c00054 | 1.00E-166 |
| BBH | 10d00018 | um03841   | 0         | um03841   | 10d00018 | 0         |
| BBH | 10d00096 | um03692   | 0         | um03692   | 10d00096 | 0         |
| BBH | 10d00038 | um03803   | 0         | um03803   | 10d00038 | 0         |
| NNN | 10c00077 | um10488   | 7.00E-45  |           |          |           |
| BBH | 10c00026 | um03810   | 1.00E-133 | um03810   | 10c00026 | 1.00E-133 |
| NNN | 10c00025 | um03813   | 0         |           |          |           |
| BBH | 10d00008 | um03854   | 0         | um03854   | 10d00008 | 0         |
| NNN | 10d00058 | um03767   | 3.00E-51  |           |          |           |
| BBH | 10c00062 | um03730.2 | 0         | um03730.2 | 10c00062 | 0         |
| BBH | 10d00075 | um10504   | 1.00E-145 | um10504   | 10d00075 | 1.00E-149 |
| BBH | 10c00042 | um03772   | 0         | um03772   | 10c00042 | 0         |
| BBH | 10c00105 | um03640   | 7.00E-84  | um03640   | 10c00105 | 3.00E-80  |
| BBH | 10d00024 | um10511   | 3.00E-59  | um10511   | 10d00024 | 7.00E-53  |
| BBH | 10d00031 | um03821   | 8.00E-45  | um03821   | 10d00031 | 5.00E-60  |
| BBH | 10d00053 | um03776   | 0         | um03776   | 10d00053 | 0         |
| BBH | 10c00087 | um03673   | 1.00E-128 | um03673   | 10c00087 | 1.00E-135 |
| BBH | 10d00065 | um03754   | 1.00E-100 | um03754   | 10d00065 | 5.00E-96  |

|     |          |           |           |           |          |           |
|-----|----------|-----------|-----------|-----------|----------|-----------|
| BBH | 10c00088 | um10482   | 5.00E-53  | um10482   | 10c00088 | 6.00E-53  |
| BBH | 10c00055 | um10659   | 0         | um10659   | 10c00055 | 0         |
| BBH | 10d00010 | um03851   | 0         | um03851   | 10d00010 | 0         |
| BBH | 10d00097 | um03691   | 0         | um03691   | 10d00097 | 0         |
| BBH | 10c00036 | um03791   | 0         | um03791   | 10c00036 | 0         |
| BBH | 10d00114 | um03657   | 7.00E-40  | um03657   | 10d00114 | 1.00E-37  |
| BBH | 10c00076 | um03694.2 | 0         | um03694.2 | 10c00076 | 0         |
| BBH | 10d00098 | um05979   | 0         | um05979   | 10d00098 | 0         |
| BBH | 10d00119 | um11963   | 1.00E-173 | um11963   | 10d00119 | 0         |
| BBH | 10d00110 | um03664   | 1.00E-163 | um03664   | 10d00110 | 1.00E-174 |
| BBH | 10c00084 | um03678   | 0         | um03678   | 10c00084 | 0         |
| BBH | 10d00039 | um03802   | 0         | um03802   | 10d00039 | 0         |
| BBH | 10d00047 | um03788   | 3.00E-34  | um03788   | 10d00047 | 3.00E-34  |
| BBH | 10d00088 | um03708.2 | 1.00E-162 | um03708.2 | 10d00088 | 1.00E-161 |
| BBH | 10d00046 | um03789   | 0         | um03789   | 10d00046 | 0         |
| BBH | 10d00074 | um03738   | 0         | um03738   | 10d00074 | 0         |
| BBH | 10c00063 | um03728   | 0         | um03728   | 10c00063 | 0         |
| BBH | 10c00096 | um10474.2 | 1.00E-134 | um10474.2 | 10c00096 | 1.00E-136 |
| BBH | 10c00047 | um03782   | 1.00E-146 | um03782   | 10c00047 | 1.00E-156 |
| BBH | 10d00036 | um03807   | 3.00E-62  | um03807   | 10d00036 | 1.00E-69  |
| BBH | 10c00032 | um11733.2 | 5.00E-40  | um11733.2 | 10c00032 | 5.00E-40  |
| BBH | 10c00045 | um03779   | 1.00E-108 | um03779   | 10c00045 | 1.00E-108 |
| BBH | 10d00025 | um03835   | 1.00E-21  | um03835   | 10d00025 | 9.00E-22  |
| NNN | 10c00083 | um03681.2 | 0         |           |          |           |
| BBH | 10d00104 | um03674   | 0         | um03674   | 10d00104 | 0         |
| BBH | 10c00027 | um03809   | 0         | um03809   | 10c00027 | 0         |
| BBH | 10d00001 | um03863   | 0         | um03863   | 10d00001 | 0         |
| BBH | 10d00003 | um03861   | 0         | um03861   | 10d00003 | 0         |
| BBH | 10d00064 | um03756   | 0         | um03756   | 10d00064 | 0         |
| BBH | 10d00052 | um03775   | 1.00E-152 | um03775   | 10d00052 | 1.00E-150 |
| BBH | 10c00001 | um11107   | 1.00E-118 | um11107   | 10c00001 | 1.00E-127 |
| BBH | 10d00120 | um03643.2 | 0         | um03643.2 | 10d00120 | 0         |
| BBH | 10d00013 | um03847   | 0         | um03847   | 10d00013 | 0         |
| BBH | 10c00013 | um03833   | 2.00E-66  | um03833   | 10c00013 | 8.00E-67  |
| BBH | 10d00094 | um03700   | 1.00E-146 | um03700   | 10d00094 | 1.00E-153 |
| BBH | 10d00084 | um12240   | 1.00E-166 | um12240   | 10d00084 | 1.00E-179 |
| NNN | 10c00065 | um10498   | 2.00E-77  |           |          |           |
| BBH | 10d00077 | um10502   | 0         | um10502   | 10d00077 | 0         |
| BBH | 10c00079 | um03690   | 0         | um03690   | 10c00079 | 0         |
| NNN | 10c00070 | um10492   | 0         |           |          |           |
| BBH | 10d00021 | um03838   | 1.00E-161 | um03838   | 10d00021 | 1.00E-161 |
| BBH | 10c00102 | um03649   | 6.00E-52  | um03649   | 10c00102 | 2.00E-45  |
| BBH | 10d00068 | um03746   | 1.00E-18  | um03746   | 10d00068 | 3.00E-19  |
| BBH | 10c00052 | um03758   | 0         | um03758   | 10c00052 | 0         |
| BBH | 10d00027 | um03829.2 | 1.00E-140 | um03829.2 | 10d00027 | 1.00E-144 |
| BBH | 10c00081 | um03687   | 6.00E-90  | um03687   | 10c00081 | 2.00E-86  |
| BBH | 10c00030 | um03806   | 3.00E-43  | um03806   | 10c00030 | 3.00E-39  |
| NNN | 10d00067 | um03748   | 7.00E-11  | um03748   | 22c00215 | 9.00E-16  |
| BBH | 10d00051 | um10664   | 0         | um10664   | 10d00051 | 0         |
| BBH | 10d00033 | um03815   | 0         | um03815   | 10d00033 | 0         |
| BBH | 10c00053 | um03755   | 1.00E-101 | um03755   | 10c00053 | 4.00E-94  |
| BBH | 10d00111 | um03663   | 0         | um03663   | 10d00111 | 0         |
| NNN | 10d00078 | um03729   | 0         |           |          |           |
| BBH | 10c00046 | um10665   | 0         | um10665   | 10c00046 | 0         |
| BBH | 10c00080 | um03689   | 1.00E-130 | um03689   | 10c00080 | 1.00E-128 |
| BBH | 10c00050 | um03766   | 1.00E-54  | um03766   | 10c00050 | 7.00E-95  |
| BBH | 10c00044 | um03777   | 0         | um03777   | 10c00044 | 0         |
| BBH | 10c00028 | um03808   | 3.00E-62  | um03808   | 10c00028 | 5.00E-72  |
| BBH | 10d00102 | um10484   | 0         | um10484   | 10d00102 | 0         |
| BBH | 10d00095 | um03698   | 1.00E-108 | um03698   | 10d00095 | 1.00E-112 |
| BBH | 10d00045 | um10668   | 0         | um10668   | 10d00045 | 0         |
| BBH | 10d00056 | um10663   | 1.00E-110 | um10663   | 10d00056 | 1.00E-106 |

|     |          |           |           |           |          |           |
|-----|----------|-----------|-----------|-----------|----------|-----------|
| BBH | 10c00064 | um10499   | 1.00E-156 | um10499   | 10c00064 | 1.00E-156 |
| BBH | 10d00085 | um03714   | 0         | um03714   | 10d00085 | 0         |
| BBH | 10c00078 | um11588   | 7.00E-58  | um11588   | 10c00078 | 1.00E-56  |
| BBH | 10d00030 | um03822   | 7.00E-32  | um03822   | 10d00030 | 8.00E-37  |
| BBH | 10c00071 | um03702   | 0         | um03702   | 10c00071 | 0         |
| NNN | 10d00123 | um03110   | 2.00E-42  | um03110   | 19c00005 | 1.00E-127 |
| BBH | 10c00082 | um03685   | 0         | um03685   | 10c00082 | 0         |
| BBH | 10d00086 | um10494   | 0         | um10494   | 10d00086 | 0         |
| BBH | 10c00066 | um10497   | 1.00E-112 | um10497   | 10c00066 | 1.00E-124 |
| BBH | 10c00012 | um10509   | 1.00E-112 | um10509   | 10c00012 | 1.00E-104 |
| BBH | 10c00101 | um03652   | 1.00E-108 | um03652   | 10c00101 | 1.00E-112 |
| BBH | 10d00012 | um11104   | 0         | um11104   | 10d00012 | 0         |
| BBH | 10c00099 | um03655   | 5.00E-85  | um03655   | 10c00099 | 2.00E-77  |
| BBH | 10d00112 | um03662   | 0         | um03662   | 10d00112 | 0         |
| BBH | 10c00095 | um03661   | 1.00E-152 | um03661   | 10c00095 | 1.00E-157 |
| BBH | 10c00086 | um10483   | 1.00E-118 | um10483   | 10c00086 | 1.00E-125 |
| BBH | 10d00009 | um03852   | 0         | um03852   | 10d00009 | 0         |
| BBH | 10c00031 | um11734   | 1.00E-133 | um11734   | 10c00031 | 1.00E-132 |
| BBH | 10d00066 | um03753   | 3.00E-35  | um03753   | 10d00066 | 8.00E-36  |
| BBH | 10c00058 | um03737   | 0         | um03737   | 10c00058 | 0         |
| BBH | 10d00050 | um03770   | 1.00E-124 | um03770   | 10d00050 | 1.00E-128 |
| BBH | 10d00076 | um03734   | 0         | um03734   | 10d00076 | 0         |
| BBH | 10d00059 | um03765   | 0         | um03765   | 10d00059 | 0         |
| BBH | 10c00051 | um03761   | 0         | um03761   | 10c00051 | 0         |
| BBH | 10d00044 | um03793   | 0         | um03793   | 10d00044 | 0         |
| BBH | 10d00101 | um03682.2 | 0         | um03682.2 | 10d00101 | 0         |
| BBH | 10c00094 | um10475   | 1.00E-111 | um10475   | 10c00094 | 1.00E-115 |
| BBH | 10c00049 | um10661.2 | 0         | um10661.2 | 10c00049 | 0         |
| BBH | 10c00020 | um03820   | 0         | um03820   | 10c00020 | 0         |
| BBH | 10c00035 | um03792   | 0         | um03792   | 10c00035 | 0         |
| NNN | 10d00100 | um10487   | 4.00E-15  | um10487   | 7d00279  | 6.00E-34  |
| BBH | 10c00007 | um11106   | 1.00E-21  | um11106   | 10c00007 | 5.00E-22  |
| NNN | 10d00122 | um03638   | 8.00E-44  |           |          |           |
| BBH | 10d00061 | um03762   | 0         | um03762   | 10d00061 | 0         |
| BBH | 10c00004 | um03865   | 1.00E-103 | um03865   | 10c00004 | 1.00E-103 |
| BBH | 10c00067 | um10496   | 1.00E-114 | um10496   | 10c00067 | 1.00E-159 |
| NNN | 10d00048 | um10667   | 6.00E-18  | um10667   | 10d00049 | 4.00E-52  |
| BBH | 10d00007 | um12243   | 0         | um12243   | 10d00007 | 0         |
| BBH | 10d00004 | um03860   | 0         | um03860   | 10d00004 | 0         |
| BBH | 10d00028 | um10508   | 3.00E-80  | um10508   | 10d00028 | 1.00E-80  |
| BBH | 10d00015 | um03845   | 2.00E-54  | um03845   | 10d00015 | 6.00E-60  |
| BBH | 10c00060 | um10503   | 0         | um10503   | 10c00060 | 0         |
| BBH | 10d00081 | um03722   | 0         | um03722   | 10d00081 | 0         |
| NNN | 10c00039 | um03784   | 0         |           |          |           |
| BBH | 10d00060 | um03763   | 1.00E-176 | um03763   | 10d00060 | 1.00E-180 |
| BBH | 10d00117 | um15081   | 4.00E-84  | um15081   | 10d00117 | 3.00E-80  |
| NNN | 10c00097 | um03658   | 1.00E-152 |           |          |           |
| BBH | 10c00093 | um03665   | 0         | um03665   | 10c00093 | 0         |
| BBH | 10c00015 | um03830   | 0         | um03830   | 10c00015 | 0         |
| BBH | 10d00035 | um03811   | 1.00E-144 | um03811   | 10d00035 | 1.00E-144 |
| BBH | 10d00082 | um03720   | 1.00E-179 | um03720   | 10d00082 | 0         |
| BBH | 10d00092 | um03701   | 0         | um03701   | 10d00092 | 0         |
| BBH | 10c00072 | um03699   | 1.00E-162 | um03699   | 10c00072 | 1.00E-160 |
| BBH | 10d00042 | um03796   | 0         | um03796   | 10d00042 | 0         |
| BBH | 10c00021 | um03819   | 0         | um03819   | 10c00021 | 0         |
| NNN | 10d00071 | um12241   | 5.00E-13  |           |          |           |
| BBH | 10c00005 | um03867   | 1.00E-135 | um03867   | 10c00005 | 1.00E-130 |
| BBH | 10c00048 | um10662   | 5.00E-89  | um10662   | 10c00048 | 3.00E-85  |
| NNN | 10c00092 | um02185   | 7.00E-17  | um02185   | 6c00055  | 5.00E-83  |
| BBH | 10d00115 | um03654   | 2.00E-44  | um03654   | 10d00115 | 5.00E-43  |
| BBH | 10c00041 | um03771   | 1.00E-163 | um03771   | 10c00041 | 1.00E-169 |
| BBH | 10d00006 | um03857   | 0         | um03857   | 10d00006 | 0         |

|     |          |           |           |           |          |           |
|-----|----------|-----------|-----------|-----------|----------|-----------|
| BBH | 10d00026 | um03832   | 0         | um03832   | 10d00026 | 0         |
| BBH | 10c00068 | um10493   | 1.00E-144 | um10493   | 10c00068 | 1.00E-142 |
| BBH | 10d00020 | um03839   | 0         | um03839   | 10d00020 | 0         |
| BBH | 10c00061 | um10500   | 3.00E-15  | um10500   | 10c00061 | 3.00E-15  |
| BBH | 10c00008 | um03853   | 0         | um03853   | 10c00008 | 0         |
| BBH | 10d00014 | um11103   | 0         | um11103   | 10d00014 | 0         |
| BBH | 10c00104 | um03645   | 0         | um03645   | 10c00104 | 0         |
| BBH | 10d00029 | um03824   | 1.00E-160 | um03824   | 10d00029 | 1.00E-154 |
| BBH | 10d00121 | um03641   | 1.00E-135 | um03641   | 10d00121 | 1.00E-145 |
| BBH | 10d00032 | um03818   | 1.00E-63  | um03818   | 10d00032 | 4.00E-56  |
| BBH | 10d00079 | um03726.2 | 2.00E-76  | um03726.2 | 10d00079 | 1.00E-71  |
| BBH | 10c00073 | um10490.2 | 5.00E-61  | um10490.2 | 10c00073 | 4.00E-58  |
| BBH | 10d00070 | um03744   | 1.00E-26  | um03744   | 10d00070 | 5.00E-27  |
| NNN | 10d00093 | um03700   | 1.00E-86  | um03700   | 10d00094 | 1.00E-153 |
| BBH | 10d00118 | um03648   | 0         | um03648   | 10d00118 | 0         |
| BBH | 10c00014 | um03831   | 1.00E-133 | um03831   | 10c00014 | 1.00E-137 |
| BBH | 10d00083 | um03718   | 1.00E-127 | um03718   | 10d00083 | 1.00E-132 |
| BBH | 10c00018 | um10507   | 1.00E-147 | um10507   | 10c00018 | 1.00E-147 |
| BBH | 10d00063 | um03759   | 1.00E-141 | um03759   | 10d00063 | 1.00E-137 |
| BBH | 10c00011 | um03843   | 1.00E-160 | um03843   | 10c00011 | 1.00E-165 |
| BBH | 10d00002 | um03866   | 0         | um03866   | 10d00002 | 0         |
| BBH | 10c00057 | um15082   | 1.00E-163 | um15082   | 10c00057 | 1.00E-177 |
| BBH | 10d00116 | um03653   | 1.00E-142 | um03653   | 10d00116 | 1.00E-138 |
| BBH | 10d00022 | um03837   | 0         | um03837   | 10d00022 | 0         |
| BBH | 10c00002 | um03862   | 1.00E-166 | um03862   | 10c00002 | 1.00E-177 |
| BBH | 10c00023 | um03816   | 0         | um03816   | 10c00023 | 0         |
| BBH | 10d00055 | um10666   | 0         | um10666   | 10d00055 | 0         |
| BBH | 10d00072 | um11964   | 0         | um11964   | 10d00072 | 0         |
| BBH | 10d00099 | um03688   | 1.00E-169 | um03688   | 10d00099 | 1.00E-170 |
| NNN | 10c00098 | um10473   | 6.00E-87  |           |          |           |
| BBH | 10d00037 | um03805   | 0         | um03805   | 10d00037 | 0         |
| BBH | 10c00040 | um03783   | 0         | um03783   | 10c00040 | 0         |
| BBH | 10d00106 | um10479   | 3.00E-20  | um10479   | 10d00106 | 1.00E-15  |
| NNN | 10c00069 | um03707   | 4.00E-11  |           |          |           |
| BBH | 10c00103 | um03647   | 0         | um03647   | 10c00103 | 0         |
| NNN | 10d00041 | um03798   | 3.00E-24  |           |          |           |
| BBH | 10c00017 | um03826   | 0         | um03826   | 10c00017 | 0         |
| BBH | 10c00089 | um10480   | 7.00E-35  | um10480   | 10c00089 | 6.00E-42  |
| NNN | 10c00074 | um03696   | 0         |           |          |           |
| BBH | 10c00091 | um12239   | 0         | um12239   | 10c00091 | 0         |
| BBH | 10d00090 | um03704   | 2.00E-21  | um03704   | 10d00090 | 2.00E-21  |
| BBH | 10c00003 | um03864   | 0         | um03864   | 10c00003 | 0         |
| BBH | 10c00033 | um15083.2 | 5.00E-60  | um15083.2 | 10c00033 | 6.00E-69  |
| BBH | 10d00103 | um03676   | 0         | um03676   | 10d00103 | 0         |
| BBH | 10d00017 | um03842   | 0         | um03842   | 10d00017 | 0         |
| BBH | 10d00054 | um03778   | 6.00E-55  | um03778   | 10d00054 | 6.00E-59  |
| BBH | 10d00019 | um15007   | 1.00E-175 | um15007   | 10d00019 | 1.00E-168 |
| BBH | 10d00005 | um03859   | 2.00E-79  | um03859   | 10d00005 | 6.00E-91  |
| BBH | 10d00023 | um10512   | 1.00E-112 | um10512   | 10d00023 | 1.00E-102 |
| BBH | 10d00107 | um10478   | 1.00E-101 | um10478   | 10d00107 | 1.00E-101 |
| BBH | 10c00006 | um03858   | 0         | um03858   | 10c00006 | 0         |
| BBH | 10c00010 | um11105   | 0         | um11105   | 10c00010 | 0         |
| BBH | 10d00049 | um10667   | 1.00E-50  | um10667   | 10d00049 | 4.00E-52  |
| BBH | 10d00105 | um10481   | 1.00E-53  | um10481   | 10d00105 | 1.00E-53  |
| BBH | 10c00024 | um03814.2 | 1.00E-162 | um03814.2 | 10c00024 | 1.00E-165 |
| BBH | 10c00043 | um03774   | 0         | um03774   | 10c00043 | 0         |
| BBH | 10c00090 | um03669   | 0         | um03669   | 10c00090 | 0         |
| BBH | 10d00073 | um03740   | 0         | um03740   | 10d00073 | 0         |
| BBH | 10d00062 | um03760   | 0         | um03760   | 10d00062 | 0         |
| BBH | 10d00089 | um03706.2 | 2.00E-42  | um03706.2 | 10d00089 | 3.00E-49  |
| BBH | 10c00075 | um03695   | 0         | um03695   | 10c00075 | 0         |
| BBH | 10d00091 | um10491   | 7.00E-68  | um10491   | 10d00091 | 3.00E-72  |

|     |          |           |           |           |          |           |
|-----|----------|-----------|-----------|-----------|----------|-----------|
| NNN | 10d00040 | um03798   | 1.00E-141 |           |          |           |
| NNN | 10c00016 | um03828   | 4.00E-39  |           |          |           |
| BBH | 10d00108 | um10477   | 1.00E-77  | um10477   | 10d00108 | 1.00E-71  |
| BBH | 10d00016 | um03844   | 1.00E-174 | um03844   | 10d00016 | 0         |
| BBH | 10d00011 | um03850   | 0         | um03850   | 10d00011 | 0         |
| BBH | 10c00106 | um11962.2 | 0         | um11962.2 | 10c00106 | 0         |
| NNN | 10c00034 | um10669   | 1.00E-157 |           |          |           |
| BBH | 10d00080 | um03724   | 1.00E-164 | um03724   | 10d00080 | 1.00E-172 |
| BBH | 10c00038 | um12242.2 | 0         | um12242.2 | 10c00038 | 0         |
| BBH | 10d00034 | um03812   | 1.00E-160 | um03812   | 10d00034 | 1.00E-167 |
| BBH | 11c00036 | um04378   | 0         | um04378   | 11c00036 | 0         |
| BBH | 11c00014 | um04332   | 9.00E-93  | um04332   | 11c00014 | 2.00E-92  |
| BBH | 11d00041 | um11153   | 8.00E-31  | um11153   | 11d00041 | 1.00E-30  |
| BBH | 11d00071 | um10538   | 1.00E-167 | um10538   | 11d00071 | 1.00E-167 |
| BBH | 11c00064 | um04421   | 9.00E-38  | um04421   | 11c00064 | 6.00E-46  |
| BBH | 11d00018 | um04343.2 | 4.00E-91  | um04343.2 | 11d00018 | 8.00E-94  |
| BBH | 11c00068 | um04428   | 4.00E-72  | um04428   | 11c00068 | 9.00E-58  |
| BBH | 11d00060 | um04441   | 1.00E-157 | um04441   | 11d00060 | 1.00E-152 |
| BBH | 11c00041 | um12062   | 1.00E-94  | um12062   | 11c00041 | 1.00E-94  |
| BBH | 11c00007 | um04320   | 1.00E-176 | um04320   | 11c00007 | 0         |
| BBH | 11c00086 | um04472   | 7.00E-49  | um04472   | 11c00086 | 1.00E-47  |
| BBH | 11c00020 | um04345   | 1.00E-41  | um04345   | 11c00020 | 4.00E-42  |
| BBH | 11d00077 | um04468   | 0         | um04468   | 11d00077 | 0         |
| BBH | 11d00053 | um10522   | 1.00E-108 | um10522   | 11d00053 | 2.00E-90  |
| BBH | 11d00081 | um04473   | 0         | um04473   | 11d00081 | 0         |
| BBH | 11c00089 | um04485   | 1.00E-145 | um04485   | 11c00089 | 1.00E-145 |
| BBH | 11c00009 | um04323   | 0         | um04323   | 11c00009 | 0         |
| BBH | 11c00037 | um04383   | 1.00E-103 | um04383   | 11c00037 | 1.00E-103 |
| BBH | 11c00056 | um04407   | 0         | um04407   | 11c00056 | 0         |
| NNN | 11c00052 | um04402   | 0         |           |          |           |
| NNN | 11d00009 | um11750   | 0         |           |          |           |
| BBH | 11c00065 | um04422   | 1.00E-136 | um04422   | 11c00065 | 1.00E-133 |
| BBH | 11c00049 | um04398   | 0         | um04398   | 11c00049 | 0         |
| BBH | 11d00038 | um11152   | 1.00E-168 | um11152   | 11d00038 | 1.00E-174 |
| BBH | 11c00013 | um04329.2 | 4.00E-83  | um04329.2 | 11c00013 | 3.00E-79  |
| BBH | 11d00042 | um12061   | 2.00E-22  | um12061   | 11d00042 | 6.00E-27  |
| BBH | 11d00026 | um04358   | 0         | um04358   | 11d00026 | 0         |
| BBH | 11d00047 | um04406   | 1.00E-155 | um04406   | 11d00047 | 1.00E-156 |
| BBH | 11d00049 | um10519   | 1.00E-114 | um10519   | 11d00049 | 1.00E-118 |
| BBH | 11c00032 | um04374   | 0         | um04374   | 11c00032 | 0         |
| BBH | 11c00042 | um04389   | 0         | um04389   | 11c00042 | 0         |
| BBH | 11c00069 | um10524   | 0         | um10524   | 11c00069 | 0         |
| BBH | 11d00006 | um04318   | 0         | um04318   | 11d00006 | 0         |
| BBH | 11d00051 | um04417   | 0         | um04417   | 11d00051 | 0         |
| BBH | 11c00087 | um04477   | 0         | um04477   | 11c00087 | 0         |
| BBH | 11c00088 | um04479   | 0         | um04479   | 11c00088 | 0         |
| BBH | 11d00054 | um04423   | 0         | um04423   | 11d00054 | 0         |
| BBH | 11d00084 | um11977   | 1.00E-109 | um11977   | 11d00084 | 9.00E-96  |
| BBH | 11c00043 | um04390   | 3.00E-58  | um04390   | 11c00043 | 7.00E-55  |
| BBH | 11d00040 | um04382   | 0         | um04382   | 11d00040 | 0         |
| BBH | 11c00053 | um12265.2 | 0         | um12265.2 | 11c00053 | 0         |
| BBH | 11c00001 | um02818   | 1.00E-147 | um02818   | 11c00001 | 1.00E-130 |
| BBH | 11c00021 | um04347   | 0         | um04347   | 11c00021 | 0         |
| BBH | 11c00038 | um04384   | 2.00E-29  | um04384   | 11c00038 | 5.00E-28  |
| BBH | 11d00089 | um04484   | 0         | um04484   | 11d00089 | 0         |
| BBH | 11c00062 | um10520   | 9.00E-79  | um10520   | 11c00062 | 1.00E-78  |
| BBH | 11d00066 | um10531   | 1.00E-48  | um10531   | 11d00066 | 5.00E-53  |
| BBH | 11d00032 | um11149   | 0         | um11149   | 11d00032 | 0         |
| BBH | 11d00030 | um11148   | 1.00E-142 | um11148   | 11d00030 | 1.00E-141 |
| BBH | 11c00030 | um05550   | 0         | um05550   | 11c00030 | 0         |
| BBH | 11d00019 | um04344   | 0         | um04344   | 11d00019 | 0         |
| BBH | 11d00016 | um12260   | 1.00E-74  | um12260   | 11d00016 | 6.00E-83  |



|     |          |           |           |           |          |           |
|-----|----------|-----------|-----------|-----------|----------|-----------|
| BBH | 11d00005 | um04317   | 2.00E-65  | um04317   | 11d00005 | 3.00E-57  |
| BBH | 11d00074 | um04462   | 1.00E-131 | um04462   | 11d00074 | 1.00E-136 |
| BBH | 11d00043 | um10513   | 0         | um10513   | 11d00043 | 0         |
| NNN | 11c00071 | um10526   | 0         |           |          |           |
| BBH | 11d00037 | um04371   | 0         | um04371   | 11d00037 | 0         |
| BBH | 11d00025 | um04356   | 0         | um04356   | 11d00025 | 0         |
| BBH | 11c00081 | um04456   | 0         | um04456   | 11c00081 | 0         |
| BBH | 11d00039 | um04381   | 0         | um04381   | 11d00039 | 0         |
| BBH | 11c00048 | um04397   | 0         | um04397   | 11c00048 | 0         |
| BBH | 11c00063 | um04419   | 0         | um04419   | 11c00063 | 0         |
| BBH | 11d00067 | um04451   | 0         | um04451   | 11d00067 | 0         |
| BBH | 11c00054 | um04404   | 1.00E-127 | um04404   | 11c00054 | 1.00E-122 |
| BBH | 11d00017 | um11142   | 0         | um11142   | 11d00017 | 0         |
| BBH | 11c00058 | um04411   | 0         | um04411   | 11c00058 | 0         |
| BBH | 11c00005 | um04314   | 4.00E-57  | um04314   | 11c00005 | 6.00E-57  |
| BBH | 11d00056 | um04426   | 1.00E-147 | um04426   | 11d00056 | 1.00E-150 |
| BBH | 11d00083 | um04475   | 0         | um04475   | 11d00083 | 0         |
| BBH | 11c00022 | um04348   | 0         | um04348   | 11c00022 | 0         |
| NNN | 11c00012 | um10843   | 3.00E-78  |           |          |           |
| NNN | 11d00029 | um11148   | 2.00E-70  | um11148   | 11d00030 | 1.00E-141 |
| BBH | 11d00015 | um10847   | 2.00E-66  | um10847   | 11d00015 | 2.00E-66  |
| BBH | 11d00073 | um04461   | 0         | um04461   | 11d00073 | 0         |
| BBH | 11d00031 | um04365   | 0         | um04365   | 11d00031 | 0         |
| NNN | 11c00028 | um12262   | 1.00E-21  | um12262   | 11c00027 | 0         |
| BBH | 11c00031 | um11150   | 0         | um11150   | 11c00031 | 0         |
| NNN | 11c00019 | um04342   | 1.00E-74  |           |          |           |
| BBH | 11d00044 | um04392   | 1.00E-148 | um04392   | 11d00044 | 1.00E-139 |
| BBH | 11d00003 | um04313   | 6.00E-72  | um04313   | 11d00003 | 5.00E-72  |
| BBH | 11d00068 | um10534   | 0         | um10534   | 11d00068 | 0         |
| BBH | 11c00055 | um04405   | 0         | um04405   | 11c00055 | 0         |
| BBH | 11c00060 | um04414   | 5.00E-85  | um04414   | 11c00060 | 1.00E-90  |
| BBH | 11c00059 | um04413   | 0         | um04413   | 11c00059 | 0         |
| BBH | 11c00044 | um04391   | 0         | um04391   | 11c00044 | 0         |
| BBH | 11c00006 | um04319   | 0         | um04319   | 11c00006 | 0         |
| BBH | 11c00011 | um04327   | 0         | um04327   | 11c00011 | 0         |
| BBH | 11d00028 | um04361   | 1.00E-180 | um04361   | 11d00028 | 0         |
| BBH | 11c00023 | um04351   | 0         | um04351   | 11c00023 | 0         |
| BBH | 11c00004 | um12259   | 0         | um12259   | 11c00004 | 0         |
| BBH | 11d00086 | um04481   | 0         | um04481   | 11d00086 | 0         |
| BBH | 11c00035 | um04370   | 0         | um04370   | 11c00035 | 0         |
| BBH | 11d00061 | um04443   | 0         | um04443   | 11d00061 | 0         |
| BBH | 11c00029 | um04362   | 1.00E-159 | um04362   | 11c00029 | 1.00E-159 |
| BBH | 11c00024 | um04352   | 1.00E-122 | um04352   | 11c00024 | 1.00E-122 |
| BBH | 11d00002 | um04310   | 0         | um04310   | 11d00002 | 0         |
| BBH | 11c00010 | um11751.2 | 0         | um11751.2 | 11c00010 | 0         |
| BBH | 11d00027 | um11147   | 0         | um11147   | 11d00027 | 0         |
| BBH | 11d00058 | um10527.2 | 1.00E-123 | um10527.2 | 11d00058 | 1.00E-133 |
| BBH | 11d00034 | um04376   | 0         | um04376   | 11d00034 | 0         |
| BBH | 11d00064 | um04447   | 2.00E-69  | um04447   | 11d00064 | 7.00E-73  |
| NNN | 11c00072 | um10528   | 0         |           |          |           |
| BBH | 11c00018 | um11141   | 1.00E-101 | um11141   | 11c00018 | 1.00E-105 |
| BBH | 11c00045 | um04393   | 5.00E-89  | um04393   | 11c00045 | 2.00E-91  |
| BBH | 11d00020 | um04346   | 0         | um04346   | 11d00020 | 0         |
| NNN | 11d00022 | um04461   | 5.00E-54  | um04461   | 11d00073 | 0         |
| BBH | 11d00076 | um04465   | 1.00E-129 | um04465   | 11d00076 | 1.00E-127 |
| BBH | 11d00014 | um04335   | 0         | um04335   | 11d00014 | 0         |
| BBH | 11d00046 | um04400   | 0         | um04400   | 11d00046 | 0         |
| BBH | 11c00080 | um10535   | 2.00E-29  | um10535   | 11c00080 | 8.00E-24  |
| BBH | 11d00085 | um04478   | 0         | um04478   | 11d00085 | 0         |
| BBH | 11d00062 | um04444   | 1.00E-146 | um04444   | 11d00062 | 1.00E-135 |
| BBH | 11c00017 | um10848   | 1.00E-168 | um10848   | 11c00017 | 1.00E-169 |
| BBH | 11c00025 | um04353   | 0         | um04353   | 11c00025 | 0         |

|     |          |         |           |         |          |           |
|-----|----------|---------|-----------|---------|----------|-----------|
| BBH | 11c00070 | um04433 | 0         | um04433 | 11c00070 | 0         |
| BBH | 11d00080 | um04471 | 5.00E-47  | um04471 | 11d00080 | 6.00E-53  |
| BBH | 11c00082 | um10539 | 1.00E-174 | um10539 | 11c00082 | 1.00E-178 |
| BBH | 11c00061 | um04416 | 0         | um04416 | 11c00061 | 0         |
| BBH | 11c00046 | um04394 | 0         | um04394 | 11c00046 | 0         |
| BBH | 11d00021 | um04350 | 0         | um04350 | 11d00021 | 0         |
| BBH | 11d00013 | um10845 | 5.00E-82  | um10845 | 11d00013 | 2.00E-82  |
| BBH | 11d00075 | um04464 | 0         | um04464 | 11d00075 | 0         |
| BBH | 11c00083 | um04463 | 1.00E-158 | um04463 | 11c00083 | 1.00E-154 |
| BBH | 11d00033 | um04368 | 1.00E-122 | um04368 | 11d00033 | 1.00E-109 |
| BBH | 11d00055 | um10523 | 3.00E-90  | um10523 | 11d00055 | 9.00E-86  |
| BBH | 11c00077 | um04448 | 2.00E-69  | um04448 | 11c00077 | 1.00E-68  |
| BBH | 11c00057 | um04410 | 0         | um04410 | 11c00057 | 0         |
| BBH | 11c00050 | um04399 | 1.00E-150 | um04399 | 11c00050 | 1.00E-150 |
| BBH | 11d00090 | um11776 | 1.00E-149 | um11776 | 11d00090 | 1.00E-152 |
| BBH | 11c00016 | um10846 | 1.00E-178 | um10846 | 11c00016 | 1.00E-178 |
| BBH | 11c00033 | um11151 | 1.00E-120 | um11151 | 11c00033 | 1.00E-116 |
| BBH | 11d00063 | um12267 | 0         | um12267 | 11d00063 | 0         |
| BBH | 11c00047 | um01038 | 1.00E-148 | um01038 | 11c00047 | 1.00E-153 |
| BBH | 11d00052 | um04420 | 1.00E-113 | um04420 | 11d00052 | 1.00E-119 |
| NNN | 11c00002 | um01877 | 3.00E-13  | um01877 | 22c00240 | 0         |
| BBH | 11d00088 | um11978 | 1.00E-77  | um11978 | 11d00088 | 3.00E-68  |
| BBH | 11c00074 | um04442 | 0         | um04442 | 11c00074 | 0         |
| BBH | 11d00070 | um04457 | 2.00E-91  | um04457 | 11d00070 | 2.00E-91  |
| BBH | 11c00078 | um10532 | 0         | um10532 | 11c00078 | 0         |
| BBH | 11c00039 | um04385 | 1.00E-108 | um04385 | 11c00039 | 1.00E-113 |
| BBH | 11c00034 | um04372 | 0         | um04372 | 11c00034 | 0         |
| BBH | 11d00069 | um10536 | 1.00E-42  | um10536 | 11d00069 | 5.00E-38  |
| BBH | 11c00084 | um04466 | 1.00E-106 | um04466 | 11c00084 | 1.00E-106 |
| BBH | 11d00012 | um04330 | 7.00E-74  | um04330 | 11d00012 | 2.00E-83  |
| BBH | 11c00051 | um04401 | 0         | um04401 | 11c00051 | 0         |
| BBH | 11c00066 | um04424 | 1.00E-16  | um04424 | 11c00066 | 2.00E-19  |
| BBH | 11d00024 | um04355 | 0         | um04355 | 11d00024 | 0         |
| BBH | 11d00057 | um04429 | 0         | um04429 | 11d00057 | 0         |
| BBH | 11d00082 | um04474 | 0         | um04474 | 11d00082 | 0         |
| BBH | 11c00079 | um10533 | 0         | um10533 | 11c00079 | 0         |
| BBH | 11d00087 | um04482 | 0         | um04482 | 11d00087 | 0         |
| BBH | 11d00072 | um04460 | 1.00E-68  | um04460 | 11d00072 | 2.00E-71  |
| BBH | 11d00036 | um12263 | 2.00E-32  | um12263 | 11d00036 | 3.00E-34  |
| BBH | 11c00027 | um12262 | 0         | um12262 | 11c00027 | 0         |
| BBH | 11c00015 | um04333 | 0         | um04333 | 11c00015 | 0         |
| NNN | 11c00003 | um00822 | 2.00E-14  | um00822 | 19c00004 | 1.00E-177 |
| BBH | 11d00023 | um04354 | 0         | um04354 | 11d00023 | 0         |
| BBH | 11d00045 | um10514 | 2.00E-34  | um10514 | 11d00045 | 3.00E-31  |
| BBH | 11d00011 | um11753 | 1.00E-31  | um11753 | 11d00011 | 2.00E-26  |
| BBH | 11c00075 | um04446 | 2.00E-36  | um04446 | 11c00075 | 5.00E-34  |
| BBH | 11c00085 | um04470 | 0         | um04470 | 11c00085 | 0         |
| BBH | 11c00026 | um04357 | 0         | um04357 | 11c00026 | 0         |
| BBH | 11d00035 | um04375 | 0         | um04375 | 11d00035 | 0         |
| BBH | 11d00050 | um04415 | 1.00E-134 | um04415 | 11d00050 | 1.00E-134 |
| BBH | 11d00078 | um10541 | 0         | um10541 | 11d00078 | 0         |
| BBH | 11c00067 | um04427 | 5.00E-31  | um04427 | 11c00067 | 4.00E-35  |
| BBH | 11d00007 | um11749 | 0         | um11749 | 11d00007 | 0         |
| BBH | 12d00088 | um02380 | 1.00E-47  | um02380 | 12d00088 | 1.00E-56  |
| BBH | 12c00090 | um02381 | 0         | um02381 | 12c00090 | 0         |
| BBH | 12d00045 | um01335 | 0         | um01335 | 12d00045 | 0         |
| BBH | 12d00057 | um01310 | 0         | um01310 | 12d00057 | 0         |
| BBH | 12c00022 | um01381 | 1.00E-63  | um01381 | 12c00022 | 2.00E-76  |
| BBH | 12d00059 | um01307 | 7.00E-98  | um01307 | 12d00059 | 1.00E-102 |
| BBH | 12d00020 | um11323 | 1.00E-152 | um11323 | 12d00020 | 1.00E-152 |
| BBH | 12d00016 | um11330 | 1.00E-108 | um11330 | 12d00016 | 1.00E-104 |
| BBH | 12c00112 | um02446 | 0         | um02446 | 12c00112 | 0         |

|     |          |           |           |           |          |           |
|-----|----------|-----------|-----------|-----------|----------|-----------|
| BBH | 12c00077 | um01274   | 0         | um01274   | 12c00077 | 0         |
| BBH | 12c00050 | um01334   | 4.00E-25  | um01334   | 12c00050 | 2.00E-25  |
| BBH | 12c00144 | um02809   | 1.00E-109 | um02809   | 12c00144 | 1.00E-104 |
| BBH | 12d00093 | um02433.2 | 1.00E-161 | um02433.2 | 12d00093 | 1.00E-169 |
| BBH | 12d00137 | um02504   | 0         | um02504   | 12d00137 | 0         |
| BBH | 12c00046 | um01341   | 0         | um01341   | 12c00046 | 0         |
| BBH | 12d00013 | um11333   | 1.00E-166 | um11333   | 12d00013 | 1.00E-166 |
| NNN | 12d00124 | um02473   | 4.00E-12  | um02473   | 12d00091 | 3.00E-15  |
| BBH | 12c00036 | um11313   | 1.00E-164 | um11313   | 12c00036 | 1.00E-161 |
| BBH | 12d00031 | um01363   | 3.00E-94  | um01363   | 12d00031 | 6.00E-99  |
| BBH | 12d00077 | um01270   | 0         | um01270   | 12d00077 | 0         |
| BBH | 12c00029 | um01370.2 | 3.00E-34  | um01370.2 | 12c00029 | 4.00E-34  |
| BBH | 12c00044 | um10244   | 1.00E-90  | um10244   | 12c00044 | 5.00E-98  |
| BBH | 12c00110 | um02450   | 4.00E-60  | um02450   | 12c00110 | 2.00E-60  |
| BBH | 12c00131 | um02472   | 2.00E-87  | um02472   | 12c00131 | 1.00E-115 |
| BBH | 12d00065 | um01289   | 0         | um01289   | 12d00065 | 0         |
| BBH | 12c00017 | um11325   | 1.00E-150 | um11325   | 12c00017 | 1.00E-139 |
| BBH | 12d00070 | um10227   | 2.00E-64  | um10227   | 12d00070 | 2.00E-64  |
| BBH | 12c00016 | um11327   | 0         | um11327   | 12c00016 | 0         |
| BBH | 12d00106 | um02415   | 2.00E-42  | um02415   | 12d00106 | 6.00E-44  |
| BBH | 12d00117 | um10165   | 1.00E-130 | um10165   | 12d00117 | 1.00E-128 |
| BBH | 12c00098 | um02439   | 0         | um02439   | 12c00098 | 0         |
| BBH | 12c00083 | um02378   | 0         | um02378   | 12c00083 | 0         |
| BBH | 12c00122 | um02483   | 1.00E-96  | um02483   | 12c00122 | 1.00E-135 |
| BBH | 12d00087 | um02375   | 0         | um02375   | 12d00087 | 0         |
| BBH | 12c00097 | um02436   | 0         | um02436   | 12c00097 | 0         |
| BBH | 12c00067 | um01295   | 1.00E-79  | um01295   | 12c00067 | 4.00E-83  |
| BBH | 12d00139 | um04557   | 5.00E-22  | um04557   | 12d00139 | 1.00E-20  |
| BBH | 12d00138 | um05617   | 1.00E-125 | um05617   | 12d00138 | 1.00E-125 |
| NNN | 12d00014 | um01408   | 1.00E-179 |           |          |           |
| BBH | 12c00086 | um02383   | 5.00E-58  | um02383   | 12c00086 | 1.00E-36  |
| BBH | 12c00013 | um01405   | 0         | um01405   | 12c00013 | 0         |
| BBH | 12c00111 | um10160   | 0         | um10160   | 12c00111 | 0         |
| NNN | 12d00094 | um02293   | 4.00E-50  | um02293   | 12c00084 | 8.00E-53  |
| BBH | 12d00028 | um01374   | 1.00E-140 | um01374   | 12d00028 | 1.00E-144 |
| NNN | 12d00030 | um11315   | 2.00E-11  |           |          |           |
| BBH | 12d00046 | um01332   | 1.00E-141 | um01332   | 12d00046 | 1.00E-141 |
| BBH | 12d00032 | um01359   | 0         | um01359   | 12d00032 | 0         |
| BBH | 12c00041 | um01351   | 2.00E-30  | um01351   | 12c00041 | 3.00E-28  |
| BBH | 12c00107 | um02419   | 1.00E-105 | um02419   | 12c00107 | 1.00E-108 |
| BBH | 12c00137 | um02493   | 0         | um02493   | 12c00137 | 0         |
| BBH | 12c00132 | um10162   | 7.00E-44  | um10162   | 12c00132 | 2.00E-35  |
| BBH | 12c00079 | um12130   | 1.00E-40  | um12130   | 12c00079 | 1.00E-40  |
| BBH | 12c00027 | um01373.2 | 1.00E-124 | um01373.2 | 12c00027 | 1.00E-127 |
| NNN | 12d00141 | um04667   | 2.00E-41  | um04667   | 27d00089 | 1.00E-134 |
| BBH | 12c00121 | um02460   | 7.00E-93  | um02460   | 12c00121 | 2.00E-92  |
| NNN | 12c00104 | um02425   | 2.00E-53  | um02425   | 12c00103 | 1.00E-116 |
| BBH | 12d00021 | um11322   | 0         | um11322   | 12d00021 | 0         |
| BBH | 12c00130 | um02475   | 1.00E-41  | um02475   | 12c00130 | 6.00E-38  |
| BBH | 12c00128 | um10163   | 8.00E-86  | um10163   | 12c00128 | 3.00E-86  |
| BBH | 12c00055 | um01322   | 0         | um01322   | 12c00055 | 0         |
| BBH | 12d00089 | um02388   | 9.00E-60  | um02388   | 12d00089 | 2.00E-64  |
| BBH | 12c00020 | um11319   | 1.00E-150 | um11319   | 12c00020 | 1.00E-157 |
| BBH | 12d00118 | um02487   | 0         | um02487   | 12d00118 | 0         |
| BBH | 12d00105 | um10152   | 0         | um10152   | 12d00105 | 0         |
| BBH | 12d00135 | um02502   | 0         | um02502   | 12d00135 | 0         |
| BBH | 12c00142 | um02499   | 1.00E-172 | um02499   | 12c00142 | 1.00E-177 |
| BBH | 12d00126 | um02469   | 1.00E-37  | um02469   | 12d00126 | 3.00E-36  |
| NNN | 12c00028 | um01372   | 1.00E-149 |           |          |           |
| BBH | 12d00075 | um11855.2 | 0         | um11855.2 | 12d00075 | 0         |
| BBH | 12d00036 | um15038   | 1.00E-136 | um15038   | 12d00036 | 1.00E-139 |
| BBH | 12d00130 | um02464   | 0         | um02464   | 12d00130 | 0         |

|     |          |           |           |           |          |           |
|-----|----------|-----------|-----------|-----------|----------|-----------|
| BBH | 12c00118 | um02456   | 0         | um02456   | 12c00118 | 0         |
| BBH | 12d00114 | um02454   | 1.00E-81  | um02454   | 12d00114 | 4.00E-83  |
| BBH | 12c00048 | um10242   | 6.00E-13  | um10242   | 12c00048 | 2.00E-16  |
| BBH | 12c00019 | um01388   | 1.00E-116 | um01388   | 12c00019 | 1.00E-112 |
| BBH | 12c00085 | um10139   | 1.00E-155 | um10139   | 12c00085 | 1.00E-148 |
| BBH | 12d00123 | um12225   | 6.00E-12  | um12225   | 12d00123 | 1.00E-11  |
| BBH | 12c00056 | um10237   | 0         | um10237   | 12c00056 | 0         |
| BBH | 12c00138 | um02495   | 0         | um02495   | 12c00138 | 0         |
| BBH | 12d00115 | um02457   | 1.00E-140 | um02457   | 12d00115 | 1.00E-150 |
| BBH | 12d00081 | um02377   | 1.00E-180 | um02377   | 12d00081 | 0         |
| BBH | 12d00080 | um10146   | 1.00E-177 | um10146   | 12d00080 | 1.00E-177 |
| BBH | 12c00014 | um01403   | 2.00E-37  | um01403   | 12c00014 | 2.00E-39  |
| BBH | 12c00080 | um11864   | 0         | um11864   | 12c00080 | 0         |
| BBH | 12c00068 | um10231   | 6.00E-95  | um10231   | 12c00068 | 1.00E-101 |
| BBH | 12d00024 | um11318   | 1.00E-82  | um11318   | 12d00024 | 1.00E-82  |
| BBH | 12c00115 | um10157   | 0         | um10157   | 12c00115 | 0         |
| BBH | 12c00125 | um02462   | 0         | um02462   | 12c00125 | 0         |
| BBH | 12d00037 | um01350   | 1.00E-156 | um01350   | 12d00037 | 0         |
| BBH | 12d00056 | um01313   | 3.00E-75  | um01313   | 12d00056 | 1.00E-78  |
| NNN | 12d00063 | um01297   | 2.00E-32  |           |          |           |
| BBH | 12c00004 | um01426   | 6.00E-59  | um01426   | 12c00004 | 8.00E-59  |
| BBH | 12c00039 | um11308   | 0         | um11308   | 12c00039 | 0         |
| BBH | 12d00091 | um02473   | 2.00E-15  | um02473   | 12d00091 | 3.00E-15  |
| BBH | 12c00074 | um12131   | 9.00E-74  | um12131   | 12c00074 | 8.00E-74  |
| BBH | 12c00105 | um02422   | 0         | um02422   | 12c00105 | 0         |
| BBH | 12c00032 | um01364   | 1.00E-100 | um01364   | 12c00032 | 1.00E-111 |
| BBH | 12d00018 | um11326   | 8.00E-92  | um11326   | 12d00018 | 2.00E-96  |
| BBH | 12c00053 | um01329   | 0         | um01329   | 12c00053 | 0         |
| BBH | 12d00004 | um01425   | 0         | um01425   | 12d00004 | 0         |
| BBH | 12c00091 | um02385   | 0         | um02385   | 12c00091 | 0         |
| BBH | 12c00120 | um02459   | 0         | um02459   | 12c00120 | 0         |
| BBH | 12d00066 | um10228.2 | 5.00E-34  | um10228.2 | 12d00066 | 7.00E-45  |
| BBH | 12d00125 | um02471   | 0         | um02471   | 12d00125 | 0         |
| BBH | 12c00103 | um02425   | 1.00E-116 | um02425   | 12c00103 | 1.00E-116 |
| BBH | 12d00015 | um01407   | 0         | um01407   | 12d00015 | 0         |
| BBH | 12c00099 | um12190   | 3.00E-32  | um12190   | 12c00099 | 1.00E-32  |
| BBH | 12c00065 | um01296   | 0         | um01296   | 12c00065 | 0         |
| BBH | 12d00048 | um01328   | 0         | um01328   | 12d00048 | 0         |
| BBH | 12d00022 | um01391   | 1.00E-126 | um01391   | 12d00022 | 1.00E-126 |
| BBH | 12c00117 | um12191   | 1.00E-23  | um12191   | 12c00117 | 2.00E-23  |
| BBH | 12d00078 | um02411   | 0         | um02411   | 12d00078 | 0         |
| BBH | 12d00110 | um10159   | 0         | um10159   | 12d00110 | 0         |
| BBH | 12d00082 | um02376   | 0         | um02376   | 12d00082 | 0         |
| BBH | 12c00033 | um01362   | 1.00E-179 | um01362   | 12c00033 | 0         |
| BBH | 12c00045 | um10243   | 1.00E-122 | um10243   | 12c00045 | 1.00E-127 |
| BBH | 12d00116 | um02482   | 2.00E-96  | um02482   | 12d00116 | 4.00E-96  |
| BBH | 12d00092 | um02431   | 0         | um02431   | 12d00092 | 0         |
| BBH | 12c00135 | um02490   | 0         | um02490   | 12c00135 | 0         |
| BBH | 12d00003 | um01429   | 1.00E-151 | um01429   | 12d00003 | 1.00E-139 |
| BBH | 12c00109 | um02414   | 0         | um02414   | 12c00109 | 0         |
| BBH | 12c00106 | um02421   | 0         | um02421   | 12c00106 | 0         |
| BBH | 12d00023 | um01387   | 2.00E-43  | um01387   | 12d00023 | 1.00E-43  |
| BBH | 12c00031 | um01366   | 1.00E-121 | um01366   | 12c00031 | 1.00E-121 |
| BBH | 12d00055 | um01314   | 0         | um01314   | 12d00055 | 0         |
| BBH | 12d00100 | um02440   | 3.00E-63  | um02440   | 12d00100 | 3.00E-63  |
| BBH | 12d00038 | um15080   | 2.00E-22  | um15080   | 12d00038 | 1.00E-22  |
| BBH | 12c00003 | um01427   | 4.00E-86  | um01427   | 12c00003 | 2.00E-86  |
| BBH | 12c00073 | um01284   | 0         | um01284   | 12c00073 | 0         |
| BBH | 12d00112 | um10158   | 0         | um10158   | 12d00112 | 0         |
| BBH | 12d00073 | um12129.2 | 3.00E-26  | um12129.2 | 12d00073 | 3.00E-26  |
| BBH | 12d00006 | um01424   | 0         | um01424   | 12d00006 | 0         |
| BBH | 12d00025 | um01383   | 0         | um01383   | 12d00025 | 0         |

|     |          |           |           |           |          |           |
|-----|----------|-----------|-----------|-----------|----------|-----------|
| BBH | 12c00009 | um01414   | 1.00E-74  | um01414   | 12c00009 | 8.00E-73  |
| BBH | 12d00054 | um01316   | 1.00E-66  | um01316   | 12d00054 | 2.00E-69  |
| BBH | 12d00039 | um10246   | 2.00E-76  | um10246   | 12d00039 | 1.00E-86  |
| BBH | 12c00011 | um11331.2 | 1.00E-31  | um11331.2 | 12c00011 | 4.00E-33  |
| BBH | 12c00054 | um01323   | 2.00E-94  | um01323   | 12c00054 | 1.00E-80  |
| NNN | 12d00062 | um10233   | 7.00E-21  |           |          |           |
| BBH | 12c00119 | um02458   | 1.00E-143 | um02458   | 12c00119 | 1.00E-147 |
| BBH | 12c00123 | um02485   | 4.00E-94  | um02485   | 12c00123 | 4.00E-94  |
| BBH | 12c00136 | um10167   | 1.00E-158 | um10167   | 12c00136 | 1.00E-163 |
| BBH | 12c00076 | um10226   | 5.00E-80  | um10226   | 12c00076 | 5.00E-80  |
| BBH | 12d00102 | um10153   | 1.00E-123 | um10153   | 12d00102 | 1.00E-129 |
| BBH | 12d00119 | um02463   | 1.00E-156 | um02463   | 12d00119 | 1.00E-148 |
| NNN | 12c00066 | um01296   | 1.00E-108 | um01296   | 12c00066 | 0         |
| BBH | 12c00082 | um02407   | 0         | um02407   | 12c00082 | 0         |
| NNN | 12c00002 | um04441   | 4.00E-15  | um04441   | 11d00060 | 1.00E-152 |
| BBH | 12c00059 | um01312   | 0         | um01312   | 12c00059 | 0         |
| BBH | 12d00012 | um12136   | 0         | um12136   | 12d00012 | 0         |
| NNN | 12c00147 | um04885   | 4.00E-13  | um04885   | 26c00001 | 0         |
| BBH | 12c00008 | um11334   | 1.00E-166 | um11334   | 12c00008 | 1.00E-170 |
| BBH | 12c00063 | um01304   | 0         | um01304   | 12c00063 | 0         |
| BBH | 12d00097 | um02435   | 0         | um02435   | 12d00097 | 0         |
| BBH | 12d00041 | um12135   | 1.00E-124 | um12135   | 12d00041 | 1.00E-119 |
| BBH | 12c00025 | um01377   | 1.00E-106 | um01377   | 12c00025 | 1.00E-105 |
| NNN | 12d00108 | um02451   | 3.00E-12  |           |          |           |
| BBH | 12d00120 | um10164   | 4.00E-54  | um10164   | 12d00120 | 1.00E-54  |
| BBH | 12d00133 | um02494   | 1.00E-108 | um02494   | 12d00133 | 1.00E-112 |
| BBH | 12d00019 | um15039   | 2.00E-32  | um15039   | 12d00019 | 2.00E-64  |
| BBH | 12c00094 | um02430   | 4.00E-59  | um02430   | 12c00094 | 1.00E-73  |
| BBH | 12d00074 | um01279   | 0         | um01279   | 12d00074 | 0         |
| BBH | 12c00140 | um02498   | 0         | um02498   | 12c00140 | 0         |
| BBH | 12d00136 | um02500   | 0         | um02500   | 12d00136 | 0         |
| BBH | 12c00129 | um02477   | 3.00E-61  | um02477   | 12c00129 | 9.00E-63  |
| BBH | 12d00035 | um11309   | 4.00E-94  | um11309   | 12d00035 | 1.00E-100 |
| BBH | 12c00075 | um01282   | 0         | um01282   | 12c00075 | 0         |
| BBH | 12c00133 | um10161   | 0         | um10161   | 12c00133 | 1.00E-143 |
| BBH | 12d00017 | um01402   | 0         | um01402   | 12d00017 | 0         |
| BBH | 12d00029 | um01371   | 0         | um01371   | 12d00029 | 0         |
| BBH | 12d00061 | um10234.2 | 0         | um10234.2 | 12d00061 | 0         |
| BBH | 12c00126 | um02461   | 0         | um02461   | 12c00126 | 0         |
| NNN | 12d00005 | um06256   | 4.00E-73  | um06256   | 24c00065 | 0         |
| BBH | 12d00076 | um11863   | 1.00E-141 | um11863   | 12d00076 | 1.00E-145 |
| NNN | 12c00001 | um03113   | 0         | um03113   | 19c00003 | 0         |
| BBH | 12c00023 | um01379   | 9.00E-91  | um01379   | 12c00023 | 5.00E-94  |
| BBH | 12d00085 | um10140   | 4.00E-18  | um10140   | 12d00085 | 5.00E-18  |
| BBH | 12d00053 | um10236   | 3.00E-53  | um10236   | 12d00053 | 1.00E-53  |
| BBH | 12d00010 | um01417   | 1.00E-157 | um01417   | 12d00010 | 1.00E-170 |
| BBH | 12d00101 | um02426   | 4.00E-80  | um02426   | 12d00101 | 8.00E-78  |
| BBH | 12c00081 | um10147   | 1.00E-62  | um10147   | 12c00081 | 2.00E-62  |
| BBH | 12c00012 | um01406   | 1.00E-129 | um01406   | 12c00012 | 1.00E-142 |
| BBH | 12d00084 | um02384   | 4.00E-42  | um02384   | 12d00084 | 2.00E-41  |
| BBH | 12c00051 | um01333   | 1.00E-71  | um01333   | 12c00051 | 1.00E-71  |
| BBH | 12d00042 | um01340   | 2.00E-65  | um01340   | 12d00042 | 2.00E-65  |
| BBH | 12d00064 | um01293   | 0         | um01293   | 12d00064 | 0         |
| NNN | 12c00064 | um01301   | 6.00E-15  | um01301   | 8c00026  | 4.00E-18  |
| BBH | 12c00007 | um11335   | 1.00E-48  | um11335   | 12c00007 | 2.00E-46  |
| BBH | 12d00113 | um02452   | 6.00E-65  | um02452   | 12d00113 | 2.00E-81  |
| BBH | 12d00090 | um02429   | 1.00E-167 | um02429   | 12d00090 | 1.00E-173 |
| BBH | 12c00141 | um02501   | 0         | um02501   | 12c00141 | 0         |
| BBH | 12c00093 | um12189   | 0         | um12189   | 12c00093 | 0         |
| BBH | 12c00092 | um02387   | 0         | um02387   | 12c00092 | 0         |
| BBH | 12d00099 | um02438   | 3.00E-93  | um02438   | 12d00099 | 1.00E-97  |
| BBH | 12d00098 | um02437   | 8.00E-58  | um02437   | 12d00098 | 2.00E-64  |

|     |          |           |           |           |          |           |
|-----|----------|-----------|-----------|-----------|----------|-----------|
| BBH | 12c00116 | um02453   | 6.00E-86  | um02453   | 12c00116 | 1.00E-85  |
| BBH | 12c00047 | um12134   | 4.00E-89  | um12134   | 12c00047 | 1.00E-105 |
| BBH | 12c00100 | um02442   | 1.00E-172 | um02442   | 12c00100 | 1.00E-165 |
| BBH | 12d00040 | um01344   | 0         | um01344   | 12d00040 | 0         |
| BBH | 12d00134 | um02496   | 0         | um02496   | 12d00134 | 0         |
| BBH | 12d00104 | um02420   | 1.00E-100 | um02420   | 12d00104 | 1.00E-105 |
| BBH | 12c00070 | um10229   | 1.00E-96  | um10229   | 12c00070 | 6.00E-96  |
| BBH | 12c00084 | um02293   | 3.00E-53  | um02293   | 12c00084 | 8.00E-53  |
| BBH | 12d00127 | um02468   | 1.00E-170 | um02468   | 12d00127 | 1.00E-176 |
| BBH | 12c00102 | um02427   | 0         | um02427   | 12c00102 | 0         |
| BBH | 12d00086 | um02374   | 0         | um02374   | 12d00086 | 0         |
| BBH | 12d00109 | um02449   | 1.00E-50  | um02449   | 12d00109 | 2.00E-51  |
| BBH | 12d00050 | um10238   | 6.00E-93  | um10238   | 12d00050 | 4.00E-85  |
| BBH | 12c00038 | um11310   | 2.00E-99  | um11310   | 12c00038 | 5.00E-88  |
| BBH | 12d00052 | um12132   | 1.00E-55  | um12132   | 12d00052 | 5.00E-50  |
| BBH | 12d00027 | um11316   | 1.00E-170 | um11316   | 12d00027 | 1.00E-172 |
| BBH | 12d00060 | um01305   | 0         | um01305   | 12d00060 | 0         |
| BBH | 12c00024 | um01378   | 0         | um01378   | 12c00024 | 0         |
| BBH | 12d00067 | um01285   | 2.00E-46  | um01285   | 12d00067 | 1.00E-42  |
| BBH | 12c00134 | um02465   | 0         | um02465   | 12c00134 | 0         |
| BBH | 12c00052 | um01331.2 | 0         | um01331.2 | 12c00052 | 0         |
| BBH | 12d00131 | um02489   | 0         | um02489   | 12d00131 | 0         |
| BBH | 12c00096 | um10155   | 1.00E-162 | um10155   | 12c00096 | 1.00E-170 |
| BBH | 12d00122 | um02476   | 1.00E-116 | um02476   | 12d00122 | 0         |
| BBH | 12d00043 | um01338   | 0         | um01338   | 12d00043 | 0         |
| BBH | 12d00072 | um01273   | 0         | um01273   | 12d00072 | 0         |
| NNN | 12c00145 | um02809   | 2.00E-35  | um02809   | 12c00144 | 1.00E-104 |
| BBH | 12d00008 | um11336   | 4.00E-88  | um11336   | 12d00008 | 8.00E-83  |
| NNN | 12c00114 | um02444   | 5.00E-48  | um02444   | 12c00113 | 1.00E-114 |
| BBH | 12c00101 | um10156   | 0         | um10156   | 12c00101 | 0         |
| BBH | 12c00006 | um01421   | 3.00E-72  | um01421   | 12c00006 | 6.00E-71  |
| BBH | 12d00033 | um01357   | 1.00E-39  | um01357   | 12d00033 | 2.00E-39  |
| BBH | 12d00009 | um01418   | 2.00E-91  | um01418   | 12d00009 | 1.00E-101 |
| BBH | 12c00042 | um11871   | 0         | um11871   | 12c00042 | 0         |
| BBH | 12c00108 | um02416   | 1.00E-11  | um02416   | 12c00108 | 5.00E-18  |
| BBH | 12c00061 | um01308   | 7.00E-36  | um01308   | 12c00061 | 3.00E-31  |
| BBH | 12c00139 | um02497   | 8.00E-15  | um02497   | 12c00139 | 1.00E-19  |
| BBH | 12c00037 | um11312   | 1.00E-64  | um11312   | 12c00037 | 8.00E-65  |
| NNN | 12c00078 | um01271   | 1.00E-146 |           |          |           |
| BBH | 12c00113 | um02444   | 1.00E-115 | um02444   | 12c00113 | 1.00E-114 |
| BBH | 12d00026 | um11317   | 1.00E-118 | um11317   | 12d00026 | 1.00E-116 |
| BBH | 12c00030 | um01367   | 0         | um01367   | 12c00030 | 0         |
| BBH | 12c00049 | um10241   | 0         | um10241   | 12c00049 | 0         |
| BBH | 12c00010 | um01411.2 | 1.00E-131 | um01411.2 | 12c00010 | 1.00E-115 |
| BBH | 12d00049 | um01327   | 0         | um01327   | 12d00049 | 0         |
| BBH | 12d00103 | um02423   | 3.00E-84  | um02423   | 12d00103 | 4.00E-93  |
| BBH | 12d00058 | um01309   | 1.00E-154 | um01309   | 12d00058 | 1.00E-135 |
| BBH | 12d00044 | um12133   | 4.00E-23  | um12133   | 12d00044 | 4.00E-37  |
| BBH | 12c00058 | um10235   | 0         | um10235   | 12c00058 | 0         |
| BBH | 12c00127 | um02481   | 0         | um02481   | 12c00127 | 0         |
| BBH | 12d00007 | um11337.2 | 1.00E-148 | um11337.2 | 12d00007 | 1.00E-152 |
| BBH | 12d00111 | um02445   | 0         | um02445   | 12d00111 | 0         |
| BBH | 12d00051 | um01321   | 0         | um01321   | 12d00051 | 0         |
| BBH | 12c00060 | um01311   | 2.00E-63  | um01311   | 12c00060 | 5.00E-63  |
| NNN | 12c00146 | um05411   | 6.00E-80  | um05411   | 15d00014 | 0         |
| NNN | 12c00095 | um10154   | 0         |           |          |           |
| BBH | 12c00062 | um01306   | 0         | um01306   | 12c00062 | 0         |
| BBH | 12c00015 | um11328   | 6.00E-80  | um11328   | 12c00015 | 7.00E-87  |
| BBH | 12c00057 | um01318   | 4.00E-63  | um01318   | 12c00057 | 8.00E-63  |
| BBH | 12c00018 | um01397   | 1.00E-128 | um01397   | 12c00018 | 1.00E-135 |
| BBH | 12d00011 | um01415   | 1.00E-139 | um01415   | 12d00011 | 1.00E-139 |
| BBH | 12d00132 | um02492   | 0         | um02492   | 12d00132 | 0         |

|     |          |           |           |           |          |           |
|-----|----------|-----------|-----------|-----------|----------|-----------|
| BBH | 12d00071 | um01275   | 1.00E-108 | um01275   | 12d00071 | 1.00E-109 |
| BBH | 12d00121 | um02478   | 1.00E-170 | um02478   | 12d00121 | 1.00E-167 |
| BBH | 12d00034 | um01355   | 1.00E-119 | um01355   | 12d00034 | 1.00E-119 |
| BBH | 12d00069 | um01278   | 2.00E-89  | um01278   | 12d00069 | 2.00E-90  |
| BBH | 12c00072 | um01286   | 0         | um01286   | 12c00072 | 0         |
| BBH | 12c00124 | um10166   | 0         | um10166   | 12c00124 | 1.00E-179 |
| NNN | 12c00005 | um01422   | 1.00E-116 |           |          |           |
| BBH | 12c00021 | um01382   | 1.00E-175 | um01382   | 12c00021 | 1.00E-172 |
| BBH | 12c00089 | um02379   | 0         | um02379   | 12c00089 | 0         |
| BBH | 13d00090 | um04050   | 0         | um04050   | 13d00090 | 0         |
| BBH | 13d00034 | um03938   | 1.00E-52  | um03938   | 13d00034 | 6.00E-50  |
| BBH | 13c00022 | um11289   | 1.00E-118 | um11289   | 13c00022 | 1.00E-115 |
| BBH | 13d00088 | um10578   | 0         | um10578   | 13d00088 | 0         |
| BBH | 13c00064 | um03995   | 0         | um03995   | 13c00064 | 0         |
| NNN | 13d00108 | um10608   | 2.00E-84  | um10608   | 26d00102 | 0         |
| BBH | 13d00065 | um03990   | 1.00E-143 | um03990   | 13d00065 | 1.00E-143 |
| BBH | 13d00040 | um03945   | 0         | um03945   | 13d00040 | 0         |
| BBH | 13c00037 | um03924   | 1.00E-122 | um03924   | 13c00037 | 1.00E-122 |
| BBH | 13c00029 | um03939   | 2.00E-68  | um03939   | 13c00029 | 2.00E-69  |
| BBH | 13c00108 | um04072   | 6.00E-26  | um04072   | 13c00108 | 4.00E-31  |
| BBH | 13d00059 | um03991   | 1.00E-122 | um03991   | 13d00059 | 1.00E-148 |
| BBH | 13c00011 | um03874   | 0         | um03874   | 13c00011 | 0         |
| BBH | 13d00100 | um04066   | 5.00E-37  | um04066   | 13d00100 | 2.00E-30  |
| BBH | 13c00028 | um03941   | 2.00E-91  | um03941   | 13c00028 | 2.00E-84  |
| BBH | 13c00099 | um04049   | 7.00E-92  | um04049   | 13c00099 | 1.00E-93  |
| BBH | 13d00054 | um03975   | 0         | um03975   | 13d00054 | 0         |
| BBH | 13c00003 | um03871   | 1.00E-145 | um03871   | 13c00003 | 1.00E-160 |
| BBH | 13c00043 | um11521   | 1.00E-145 | um11521   | 13c00043 | 1.00E-150 |
| BBH | 13c00074 | um03984   | 0         | um03984   | 13c00074 | 0         |
| BBH | 13d00017 | um03901   | 0         | um03901   | 13d00017 | 0         |
| BBH | 13c00087 | um04015   | 1.00E-147 | um04015   | 13c00087 | 1.00E-158 |
| BBH | 13d00039 | um03925   | 1.00E-129 | um03925   | 13d00039 | 1.00E-165 |
| BBH | 13c00100 | um04051   | 3.00E-71  | um04051   | 13c00100 | 2.00E-70  |
| BBH | 13d00089 | um04047   | 8.00E-97  | um04047   | 13d00089 | 1.00E-94  |
| BBH | 13c00054 | um03974   | 0         | um03974   | 13c00054 | 0         |
| BBH | 13d00024 | um15070   | 0         | um15070   | 13d00024 | 0         |
| BBH | 13d00060 | um11740.2 | 0         | um11740.2 | 13d00060 | 0         |
| BBH | 13c00097 | um04046   | 0         | um04046   | 13c00097 | 0         |
| BBH | 13d00107 | um04076   | 6.00E-65  | um04076   | 13d00107 | 7.00E-65  |
| BBH | 13c00081 | um04022   | 0         | um04022   | 13c00081 | 0         |
| BBH | 13d00033 | um12246   | 1.00E-112 | um12246   | 13d00033 | 1.00E-116 |
| BBH | 13d00008 | um03883   | 0         | um03883   | 13d00008 | 0         |
| BBH | 13d00070 | um03980   | 0         | um03980   | 13d00070 | 0         |
| BBH | 13d00080 | um11057   | 0         | um11057   | 13d00080 | 0         |
| BBH | 13c00021 | um03911   | 1.00E-142 | um03911   | 13c00021 | 1.00E-142 |
| BBH | 13d00048 | um03963   | 0         | um03963   | 13d00048 | 0         |
| BBH | 13d00001 | um11514   | 0         | um11514   | 13d00001 | 0         |
| NNN | 13d00098 | um00372   | 8.00E-70  | um00372   | 9d00180  | 0         |
| BBH | 13d00018 | um11968   | 1.00E-169 | um11968   | 13d00018 | 1.00E-178 |
| BBH | 13d00079 | um11056   | 1.00E-153 | um11056   | 13d00079 | 1.00E-153 |
| BBH | 13c00065 | um03997   | 0         | um03997   | 13c00065 | 0         |
| BBH | 13d00097 | um04062   | 0         | um04062   | 13d00097 | 1.00E-160 |
| BBH | 13c00107 | um11635   | 2.00E-86  | um11635   | 13c00107 | 8.00E-87  |
| BBH | 13d00011 | um11509   | 1.00E-78  | um11509   | 13d00011 | 7.00E-83  |
| BBH | 13c00004 | um03873   | 1.00E-118 | um03873   | 13c00004 | 1.00E-118 |
| BBH | 13d00016 | um11966.2 | 0         | um11966.2 | 13d00016 | 0         |
| BBH | 13c00012 | um03897   | 2.00E-92  | um03897   | 13c00012 | 1.00E-92  |
| BBH | 13c00041 | um03952   | 1.00E-128 | um03952   | 13c00041 | 1.00E-132 |
| BBH | 13c00027 | um03943   | 1.00E-99  | um03943   | 13c00027 | 2.00E-99  |
| BBH | 13d00051 | um11738   | 0         | um11738   | 13d00051 | 0         |
| BBH | 13d00025 | um11288   | 5.00E-46  | um11288   | 13d00025 | 9.00E-47  |
| BBH | 13d00015 | um03898   | 0         | um03898   | 13d00015 | 0         |

|     |          |           |           |           |          |           |
|-----|----------|-----------|-----------|-----------|----------|-----------|
| BBH | 13d00042 | um03949   | 0         | um03949   | 13d00042 | 0         |
| BBH | 13c00008 | um11511   | 2.00E-44  | um11511   | 13c00008 | 5.00E-40  |
| BBH | 13d00101 | um04067   | 1.00E-156 | um04067   | 13d00101 | 1.00E-160 |
| BBH | 13d00003 | um03872   | 3.00E-74  | um03872   | 13d00003 | 1.00E-77  |
| BBH | 13c00053 | um03972   | 1.00E-175 | um03972   | 13c00053 | 1.00E-167 |
| BBH | 13d00036 | um03935   | 1.00E-151 | um03935   | 13d00036 | 1.00E-147 |
| BBH | 13d00077 | um11054   | 1.00E-53  | um11054   | 13d00077 | 2.00E-54  |
| BBH | 13c00094 | um04043   | 1.00E-114 | um04043   | 13c00094 | 1.00E-121 |
| BBH | 13c00066 | um11743   | 1.00E-26  | um11743   | 13c00066 | 1.00E-26  |
| BBH | 13c00020 | um03908   | 0         | um03908   | 13c00020 | 0         |
| BBH | 13d00086 | um04042   | 0         | um04042   | 13d00086 | 0         |
| BBH | 13d00047 | um11735   | 5.00E-95  | um11735   | 13d00047 | 1.00E-103 |
| BBH | 13c00098 | um04048   | 1.00E-52  | um04048   | 13c00098 | 4.00E-43  |
| BBH | 13c00088 | um11055   | 1.00E-115 | um11055   | 13c00088 | 1.00E-126 |
| BBH | 13d00067 | um03985   | 1.00E-136 | um03985   | 13d00067 | 1.00E-139 |
| BBH | 13c00048 | um03960   | 3.00E-28  | um03960   | 13c00048 | 3.00E-33  |
| BBH | 13c00030 | um03937   | 0         | um03937   | 13c00030 | 0         |
| BBH | 13c00035 | um03929   | 1.00E-80  | um03929   | 13c00035 | 7.00E-90  |
| BBH | 13d00026 | um03914   | 1.00E-153 | um03914   | 13d00026 | 1.00E-157 |
| BBH | 13c00106 | um04070   | 4.00E-70  | um04070   | 13c00106 | 4.00E-70  |
| BBH | 13c00013 | um11516   | 5.00E-70  | um11516   | 13c00013 | 9.00E-64  |
| BBH | 13d00102 | um15094   | 0         | um15094   | 13d00102 | 0         |
| BBH | 13c00005 | um03890   | 2.00E-72  | um03890   | 13c00005 | 4.00E-85  |
| BBH | 13c00045 | um03956   | 5.00E-48  | um03956   | 13c00045 | 2.00E-53  |
| BBH | 13d00052 | um03970   | 4.00E-62  | um03970   | 13d00052 | 5.00E-52  |
| BBH | 13d00068 | um03983   | 8.00E-92  | um03983   | 13d00068 | 4.00E-92  |
| BBH | 13d00111 | um04080   | 0         | um04080   | 13d00111 | 0         |
| BBH | 13d00104 | um04071   | 0         | um04071   | 13d00104 | 0         |
| BBH | 13c00079 | um11051   | 1.00E-149 | um11051   | 13c00079 | 1.00E-148 |
| BBH | 13d00041 | um03946   | 1.00E-103 | um03946   | 13d00041 | 1.00E-107 |
| BBH | 13d00087 | um11063.2 | 0         | um11063.2 | 13d00087 | 0         |
| NNN | 13d00109 | um04081   | 2.00E-12  | um04081   | 24d00036 | 2.00E-14  |
| BBH | 13c00067 | um11744   | 6.00E-54  | um11744   | 13c00067 | 2.00E-46  |
| BBH | 13c00052 | um03969   | 0         | um03969   | 13c00052 | 0         |
| BBH | 13d00091 | um10579   | 1.00E-131 | um10579   | 13d00091 | 1.00E-117 |
| BBH | 13c00089 | um04026   | 0         | um04026   | 13c00089 | 0         |
| BBH | 13c00083 | um04020   | 9.00E-75  | um04020   | 13c00083 | 8.00E-75  |
| NNN | 13c00095 | um04044   | 0         |           |          |           |
| BBH | 13c00059 | um04005   | 1.00E-130 | um04005   | 13c00059 | 1.00E-124 |
| BBH | 13d00035 | um03936   | 0         | um03936   | 13d00035 | 0         |
| BBH | 13c00082 | um11053   | 1.00E-35  | um11053   | 13c00082 | 1.00E-35  |
| BBH | 13c00047 | um03958   | 1.00E-130 | um03958   | 13c00047 | 1.00E-121 |
| BBH | 13c00026 | um03923   | 2.00E-63  | um03923   | 13c00026 | 2.00E-61  |
| BBH | 13d00027 | um03917   | 0         | um03917   | 13d00027 | 0         |
| BBH | 13c00038 | um12247   | 3.00E-53  | um12247   | 13c00038 | 3.00E-53  |
| BBH | 13c00039 | um03947   | 0         | um03947   | 13c00039 | 0         |
| BBH | 13d00014 | um03876.2 | 0         | um03876.2 | 13d00014 | 0         |
| BBH | 13c00006 | um03888   | 1.00E-170 | um03888   | 13c00006 | 1.00E-177 |
| BBH | 13c00105 | um12251   | 4.00E-49  | um12251   | 13c00105 | 1.00E-48  |
| NNN | 13c00014 | um15099   | 9.00E-78  |           |          |           |
| BBH | 13d00099 | um04064   | 1.00E-167 | um04064   | 13d00099 | 1.00E-164 |
| NNN | 13d00044 | um11525   | 6.00E-95  | um11525   | 12c00058 | 1.00E-117 |
| BBH | 13d00058 | um04006   | 1.00E-105 | um04006   | 13d00058 | 1.00E-114 |
| BBH | 13d00075 | um04021   | 0         | um04021   | 13d00075 | 0         |
| NNN | 13d00049 | um03964   | 1.00E-105 |           |          |           |
| BBH | 13d00023 | um03910   | 8.00E-51  | um03910   | 13d00023 | 5.00E-51  |
| BBH | 13c00034 | um03933   | 7.00E-19  | um03933   | 13c00034 | 8.00E-17  |
| BBH | 13c00109 | um04074   | 1.00E-143 | um04074   | 13c00109 | 1.00E-137 |
| BBH | 13d00031 | um03944   | 0         | um03944   | 13d00031 | 0         |
| BBH | 13c00093 | um11062   | 1.00E-40  | um11062   | 13c00093 | 6.00E-41  |
| BBH | 13c00078 | um11050   | 1.00E-110 | um11050   | 13c00078 | 1.00E-111 |
| NNN | 13c00010 | um05972   | 1.00E-127 | um05972   | 6c00005  | 0         |



|     |          |           |           |           |          |           |
|-----|----------|-----------|-----------|-----------|----------|-----------|
| BBH | 13d00007 | um03884   | 0         | um03884   | 13d00007 | 0         |
| BBH | 13d00028 | um03918   | 1.00E-126 | um03918   | 13d00028 | 1.00E-143 |
| BBH | 13d00073 | um11049.2 | 0         | um11049.2 | 13d00073 | 0         |
| BBH | 13c00051 | um03967   | 0         | um03967   | 13c00051 | 0         |
| BBH | 13c00058 | um15008   | 1.00E-162 | um15008   | 13c00058 | 1.00E-167 |
| BBH | 13d00061 | um11741   | 1.00E-142 | um11741   | 13d00061 | 1.00E-150 |
| BBH | 13c00060 | um04004   | 0         | um04004   | 13c00060 | 0         |
| BBH | 13d00094 | um04057   | 1.00E-168 | um04057   | 13d00094 | 1.00E-161 |
| BBH | 13c00092 | um04038   | 4.00E-70  | um04038   | 13c00092 | 4.00E-65  |
| BBH | 13c00111 | um11526   | 3.00E-78  | um11526   | 13c00111 | 3.00E-76  |
| BBH | 13c00025 | um03921   | 0         | um03921   | 13c00025 | 0         |
| BBH | 13d00074 | um04013   | 2.00E-75  | um04013   | 13d00074 | 2.00E-80  |
| BBH | 13d00020 | um03906   | 1.00E-144 | um03906   | 13d00020 | 1.00E-159 |
| BBH | 13d00093 | um04056   | 0         | um04056   | 13d00093 | 0         |
| BBH | 13d00030 | um11291   | 0         | um11291   | 13d00030 | 0         |
| BBH | 13c00033 | um11517   | 2.00E-41  | um11517   | 13c00033 | 9.00E-50  |
| BBH | 13d00110 | um04079   | 1.00E-124 | um04079   | 13d00110 | 1.00E-143 |
| BBH | 13d00050 | um03966   | 2.00E-19  | um03966   | 13d00050 | 4.00E-19  |
| BBH | 13d00055 | um04009   | 1.00E-124 | um04009   | 13d00055 | 1.00E-129 |
| BBH | 13d00012 | um03877   | 1.00E-150 | um03877   | 13d00012 | 1.00E-147 |
| BBH | 13c00040 | um03950   | 7.00E-63  | um03950   | 13c00040 | 9.00E-68  |
| BBH | 13c00007 | um03886   | 0         | um03886   | 13c00007 | 0         |
| BBH | 13d00076 | um04017   | 3.00E-84  | um04017   | 13d00076 | 4.00E-90  |
| BBH | 13d00029 | um11290   | 0         | um11290   | 13d00029 | 0         |
| BBH | 13d00069 | um03982   | 1.00E-97  | um03982   | 13d00069 | 1.00E-108 |
| BBH | 13d00002 | um03892   | 0         | um03892   | 13d00002 | 0         |
| BBH | 13d00038 | um03927   | 1.00E-139 | um03927   | 13d00038 | 1.00E-129 |
| NNN | 13c00061 | um03992   | 1.00E-101 |           |          |           |
| BBH | 13c00049 | um11736   | 9.00E-75  | um11736   | 13c00049 | 1.00E-75  |
| BBH | 13c00002 | um03893   | 1.00E-114 | um03893   | 13c00002 | 1.00E-117 |
| BBH | 13c00068 | um04000   | 3.00E-42  | um04000   | 13c00068 | 2.00E-35  |
| BBH | 13c00050 | um03965.2 | 1.00E-107 | um03965.2 | 13c00050 | 1.00E-107 |
| BBH | 13c00057 | um11046   | 1.00E-119 | um11046   | 13c00057 | 1.00E-136 |
| BBH | 13d00092 | um04055   | 1.00E-106 | um04055   | 13d00092 | 0         |
| BBH | 13d00005 | um12244   | 3.00E-38  | um12244   | 13d00005 | 2.00E-40  |
| BBH | 13d00103 | um04069   | 0         | um04069   | 13d00103 | 0         |
| BBH | 13c00084 | um04019   | 8.00E-99  | um04019   | 13c00084 | 1.00E-112 |
| BBH | 13c00104 | um04059   | 0         | um04059   | 13c00104 | 0         |
| BBH | 13c00024 | um03919   | 5.00E-62  | um03919   | 13c00024 | 1.00E-62  |
| BBH | 13c00015 | um11967   | 0         | um11967   | 13c00015 | 0         |
| BBH | 13c00077 | um03977   | 3.00E-26  | um03977   | 13c00077 | 5.00E-26  |
| BBH | 13d00043 | um03953   | 2.00E-66  | um03953   | 13d00043 | 7.00E-60  |
| BBH | 13c00070 | um11747.2 | 6.00E-65  | um11747.2 | 13c00070 | 2.00E-59  |
| BBH | 13c00036 | um03928   | 0         | um03928   | 13c00036 | 0         |
| BBH | 13c00023 | um03916   | 3.00E-37  | um03916   | 13c00023 | 2.00E-39  |
| BBH | 13c00017 | um03902   | 0         | um03902   | 13c00017 | 0         |
| BBH | 13c00085 | um04016   | 2.00E-35  | um04016   | 13c00085 | 1.00E-46  |
| BBH | 13c00044 | um11522   | 4.00E-41  | um11522   | 13c00044 | 3.00E-38  |
| BBH | 13d00056 | um04007   | 2.00E-82  | um04007   | 13d00056 | 1.00E-89  |
| BBH | 13d00009 | um03881   | 4.00E-64  | um03881   | 13d00009 | 7.00E-77  |
| BBH | 13c00102 | um04054   | 1.00E-172 | um04054   | 13c00102 | 1.00E-170 |
| BBH | 13d00071 | um03978   | 5.00E-33  | um03978   | 13d00071 | 5.00E-33  |
| BBH | 13d00096 | um04060   | 1.00E-126 | um04060   | 13d00096 | 1.00E-120 |
| BBH | 13c00069 | um11745   | 0         | um11745   | 13c00069 | 0         |
| BBH | 13d00046 | um03959   | 0         | um03959   | 13d00046 | 0         |
| BBH | 13d00082 | um04030   | 3.00E-37  | um04030   | 13d00082 | 3.00E-26  |
| BBH | 13d00081 | um04029   | 1.00E-159 | um04029   | 13d00081 | 1.00E-159 |
| BBH | 13d00037 | um03930   | 1.00E-74  | um03930   | 13d00037 | 4.00E-75  |
| BBH | 13c00056 | um11047   | 0         | um11047   | 13c00056 | 0         |
| NNN | 13d00066 | um11739   | 7.00E-76  |           |          |           |
| BBH | 13c00062 | um03994   | 1.00E-155 | um03994   | 13c00062 | 1.00E-155 |
| BBH | 13d00063 | um12250   | 0         | um12250   | 13d00063 | 0         |

|     |          |           |           |           |          |           |
|-----|----------|-----------|-----------|-----------|----------|-----------|
| BBH | 13c00090 | um04032   | 0         | um04032   | 13c00090 | 0         |
| BBH | 13c00071 | um03989.2 | 1.00E-110 | um03989.2 | 13c00071 | 1.00E-130 |
| BBH | 13c00076 | um03979   | 1.00E-168 | um03979   | 13c00076 | 0         |
| BBH | 13c00019 | um11970   | 2.00E-98  | um11970   | 13c00019 | 1.00E-120 |
| BBH | 13d00010 | um03880   | 1.00E-131 | um03880   | 13d00010 | 1.00E-137 |
| BBH | 13c00031 | um11518   | 0         | um11518   | 13c00031 | 0         |
| BBH | 13c00101 | um04053   | 0         | um04053   | 13c00101 | 0         |
| BBH | 13d00032 | um03942   | 0         | um03942   | 13d00032 | 0         |
| BBH | 13d00022 | um03909   | 0         | um03909   | 13d00022 | 0         |
| BBH | 13d00053 | um03973   | 0         | um03973   | 13d00053 | 0         |
| NNN | 13d00072 | um11048   | 0         |           |          |           |
| BBH | 13c00018 | um03905   | 1.00E-171 | um03905   | 13c00018 | 0         |
| BBH | 13d00105 | um11636   | 0         | um11636   | 13d00105 | 0         |
| BBH | 13c00009 | um11510   | 0         | um11510   | 13c00009 | 0         |
| BBH | 13c00091 | um04031   | 0         | um04031   | 13c00091 | 0         |
| BBH | 13c00072 | um03987   | 0         | um03987   | 13c00072 | 0         |
| BBH | 13c00086 | um11052   | 2.00E-30  | um11052   | 13c00086 | 4.00E-27  |
| BBH | 13c00075 | um11973   | 1.00E-140 | um11973   | 13c00075 | 1.00E-140 |
| BBH | 13d00006 | um11512   | 1.00E-121 | um11512   | 13d00006 | 1.00E-122 |
| BBH | 13d00021 | um15063   | 0         | um15063   | 13d00021 | 0         |
| BBH | 13d00095 | um04061   | 1.00E-155 | um04061   | 13d00095 | 1.00E-155 |
| NNN | 13c00063 | um03994   | 1.00E-109 | um03994   | 13c00062 | 1.00E-155 |
| NNN | 13d00064 | um11746   | 1.00E-134 |           |          |           |
| BBH | 13c00055 | um03976   | 1.00E-173 | um03976   | 13c00055 | 1.00E-176 |
| BBH | 14c00123 | um03166   | 2.00E-28  | um03166   | 14c00123 | 4.00E-27  |
| BBH | 14d00074 | um10649   | 1.00E-114 | um10649   | 14d00074 | 1.00E-104 |
| BBH | 14d00021 | um03347   | 0         | um03347   | 14d00021 | 0         |
| NNN | 14c00082 | um03232   | 3.00E-21  | um03232   | 14c00083 | 2.00E-22  |
| BBH | 14c00014 | um03361   | 0         | um03361   | 14c00014 | 0         |
| BBH | 14d00117 | um12208   | 0         | um12208   | 14d00117 | 0         |
| BBH | 14c00032 | um03317   | 1.00E-175 | um03317   | 14c00032 | 0         |
| BBH | 14c00071 | um11956   | 3.00E-84  | um11956   | 14c00071 | 3.00E-86  |
| BBH | 14d00050 | um03286   | 0         | um03286   | 14d00050 | 0         |
| BBH | 14c00053 | um03278   | 0         | um03278   | 14c00053 | 0         |
| BBH | 14c00006 | um11016   | 1.00E-135 | um11016   | 14c00006 | 1.00E-136 |
| BBH | 14d00109 | um03171.2 | 1.00E-159 | um03171.2 | 14d00109 | 1.00E-160 |
| NNN | 14c00061 | um03267   | 0         |           |          |           |
| BBH | 14c00129 | um03134   | 2.00E-52  | um03134   | 14c00129 | 2.00E-52  |
| BBH | 14d00111 | um03162   | 0         | um03162   | 14d00111 | 0         |
| BBH | 14c00090 | um10645   | 1.00E-148 | um10645   | 14c00090 | 1.00E-132 |
| BBH | 14c00119 | um03165   | 1.00E-126 | um03165   | 14c00119 | 1.00E-110 |
| BBH | 14d00036 | um10836   | 0         | um10836   | 14d00036 | 0         |
| BBH | 14d00088 | um03204   | 0         | um03204   | 14d00088 | 0         |
| BBH | 14c00112 | um03152   | 1.00E-129 | um03152   | 14c00112 | 1.00E-129 |
| BBH | 14c00075 | um03242   | 4.00E-30  | um03242   | 14c00075 | 2.00E-20  |
| BBH | 14d00027 | um03337   | 1.00E-105 | um03337   | 14d00027 | 1.00E-104 |
| BBH | 14c00027 | um10654   | 5.00E-14  | um10654   | 14c00027 | 5.00E-14  |
| BBH | 14c00066 | um03254   | 0         | um03254   | 14c00066 | 0         |
| BBH | 14c00105 | um03147   | 0         | um03147   | 14c00105 | 0         |
| BBH | 14c00130 | um03132   | 1.00E-119 | um03132   | 14c00130 | 1.00E-126 |
| BBH | 14d00102 | um03192   | 3.00E-37  | um03192   | 14d00102 | 1.00E-47  |
| BBH | 14d00029 | um03331   | 1.00E-178 | um03331   | 14d00029 | 0         |
| BBH | 14c00017 | um03353   | 1.00E-125 | um03353   | 14c00017 | 1.00E-130 |
| BBH | 14d00022 | um03346.2 | 4.00E-61  | um03346.2 | 14d00022 | 8.00E-61  |
| BBH | 14d00073 | um03238   | 1.00E-154 | um03238   | 14d00073 | 1.00E-178 |
| BBH | 14d00070 | um10650   | 0         | um10650   | 14d00070 | 0         |
| NNN | 14c00100 | um10401   | 0         |           |          |           |
| BBH | 14c00083 | um03232   | 1.00E-22  | um03232   | 14c00083 | 2.00E-22  |
| BBH | 14d00067 | um03263   | 0         | um03263   | 14d00067 | 0         |
| BBH | 14c00062 | um10652   | 1.00E-124 | um10652   | 14c00062 | 1.00E-116 |
| BBH | 14c00065 | um03253   | 0         | um03253   | 14c00065 | 0         |
| BBH | 14d00003 | um03383   | 3.00E-96  | um03383   | 14d00003 | 1.00E-117 |

|     |          |           |           |           |          |           |
|-----|----------|-----------|-----------|-----------|----------|-----------|
| BBH | 14d00055 | um03276   | 2.00E-26  | um03276   | 14d00055 | 3.00E-27  |
| BBH | 14d00094 | um03148   | 0         | um03148   | 14d00094 | 0         |
| BBH | 14c00050 | um03283   | 1.00E-47  | um03283   | 14c00050 | 3.00E-52  |
| BBH | 14d00019 | um03349   | 1.00E-124 | um03349   | 14d00019 | 1.00E-123 |
| BBH | 14c00001 | um11017   | 1.00E-143 | um11017   | 14c00001 | 1.00E-140 |
| BBH | 14d00012 | um03363   | 0         | um03363   | 14d00012 | 0         |
| BBH | 14d00089 | um03201   | 4.00E-40  | um03201   | 14d00089 | 5.00E-40  |
| BBH | 14c00135 | um05978   | 1.00E-111 | um05978   | 14c00135 | 1.00E-111 |
| BBH | 14c00121 | um03168.2 | 8.00E-48  | um03168.2 | 14c00121 | 5.00E-47  |
| BBH | 14d00080 | um03218   | 1.00E-127 | um03218   | 14d00080 | 1.00E-124 |
| BBH | 14d00037 | um10835   | 1.00E-51  | um10835   | 14d00037 | 2.00E-59  |
| BBH | 14c00026 | um03330   | 2.00E-81  | um03330   | 14c00026 | 5.00E-80  |
| BBH | 14d00028 | um03333   | 2.00E-80  | um03333   | 14d00028 | 1.00E-77  |
| BBH | 14c00070 | um03261   | 0         | um03261   | 14c00070 | 0         |
| BBH | 14c00023 | um12222   | 1.00E-135 | um12222   | 14c00023 | 1.00E-137 |
| BBH | 14d00106 | um03158   | 1.00E-152 | um03158   | 14d00106 | 1.00E-152 |
| NNN | 14c00084 | um10648   | 0         | um10648   | 14c00045 | 0         |
| BBH | 14c00074 | um03244   | 6.00E-52  | um03244   | 14c00074 | 8.00E-47  |
| BBH | 14d00103 | um03194   | 1.00E-165 | um03194   | 14d00103 | 1.00E-170 |
| BBH | 14d00056 | um10824   | 0         | um10824   | 14d00056 | 0         |
| BBH | 14c00051 | um03282   | 1.00E-149 | um03282   | 14c00051 | 1.00E-149 |
| BBH | 14d00093 | um03150   | 1.00E-122 | um03150   | 14d00093 | 1.00E-125 |
| BBH | 14c00022 | um03336   | 1.00E-153 | um03336   | 14c00022 | 1.00E-153 |
| BBH | 14c00106 | um03146   | 0         | um03146   | 14c00106 | 0         |
| BBH | 14c00068 | um11954   | 0         | um11954   | 14c00068 | 0         |
| BBH | 14c00009 | um03373   | 1.00E-155 | um03373   | 14c00009 | 1.00E-159 |
| BBH | 14c00039 | um03304   | 4.00E-34  | um03304   | 14c00039 | 4.00E-32  |
| BBH | 14d00011 | um03365   | 2.00E-25  | um03365   | 14d00011 | 7.00E-35  |
| BBH | 14c00012 | um03366   | 0         | um03366   | 14c00012 | 0         |
| BBH | 14d00105 | um03153   | 0         | um03153   | 14d00105 | 0         |
| BBH | 14c00126 | um12212   | 5.00E-96  | um12212   | 14c00126 | 4.00E-92  |
| BBH | 14c00024 | um10656   | 0         | um10656   | 14c00024 | 0         |
| BBH | 14c00030 | um10842   | 1.00E-121 | um10842   | 14c00030 | 1.00E-121 |
| NNN | 14d00004 | um06453   | 2.00E-66  | um06453   | 1c00050  | 1.00E-123 |
| BBH | 14c00092 | um10643   | 0         | um10643   | 14c00092 | 0         |
| BBH | 14d00092 | um03182   | 0         | um03182   | 14d00092 | 0         |
| BBH | 14c00059 | um03271   | 1.00E-127 | um03271   | 14c00059 | 1.00E-109 |
| NNN | 14d00122 | um10220   | 4.00E-11  | um10220   | 15c00012 | 1.00E-174 |
| BBH | 14c00025 | um03332   | 2.00E-83  | um03332   | 14c00025 | 7.00E-86  |
| BBH | 14d00025 | um03341   | 0         | um03341   | 14d00025 | 0         |
| BBH | 14c00063 | um03250   | 0         | um03250   | 14c00063 | 0         |
| BBH | 14c00042 | um03296   | 7.00E-86  | um03296   | 14c00042 | 6.00E-83  |
| BBH | 14c00069 | um03260   | 3.00E-23  | um03260   | 14c00069 | 1.00E-30  |
| BBH | 14d00119 | um03127   | 0         | um03127   | 14d00119 | 0         |
| BBH | 14d00081 | um10644   | 1.00E-155 | um10644   | 14d00081 | 1.00E-161 |
| BBH | 14d00113 | um03177   | 9.00E-79  | um03177   | 14d00113 | 9.00E-79  |
| BBH | 14c00056 | um03274   | 1.00E-20  | um03274   | 14c00056 | 1.00E-20  |
| BBH | 14c00124 | um03172   | 1.00E-104 | um03172   | 14c00124 | 1.00E-95  |
| BBH | 14d00079 | um03220   | 1.00E-126 | um03220   | 14d00079 | 1.00E-133 |
| BBH | 14d00041 | um03301   | 0         | um03301   | 14d00041 | 0         |
| BBH | 14d00069 | um03266   | 0         | um03266   | 14d00069 | 0         |
| BBH | 14c00098 | um03200   | 0         | um03200   | 14c00098 | 1.00E-180 |
| BBH | 14d00053 | um10827   | 1.00E-174 | um10827   | 14d00053 | 0         |
| BBH | 14c00031 | um10840   | 0         | um10840   | 14c00031 | 0         |
| BBH | 14c00045 | um03293   | 0         | um03293   | 14c00045 | 0         |
| BBH | 14c00091 | um03216   | 0         | um03216   | 14c00091 | 0         |
| BBH | 14c00088 | um03221   | 1.00E-174 | um03221   | 14c00088 | 1.00E-179 |
| NNN | 14d00001 | um00061   | 4.00E-16  | um00061   | 9d00030  | 0         |
| BBH | 14c00015 | um11009   | 0         | um11009   | 14c00015 | 0         |
| BBH | 14d00104 | um10399   | 1.00E-102 | um10399   | 14d00104 | 1.00E-106 |
| BBH | 14d00020 | um03348   | 1.00E-116 | um03348   | 14d00020 | 1.00E-111 |
| BBH | 14c00008 | um03375   | 1.00E-167 | um03375   | 14c00008 | 1.00E-161 |

|     |          |           |           |           |          |           |
|-----|----------|-----------|-----------|-----------|----------|-----------|
| BBH | 14d00026 | um12223   | 6.00E-16  | um12223   | 14d00026 | 2.00E-18  |
| BBH | 14d00108 | um03164   | 0         | um03164   | 14d00108 | 0         |
| BBH | 14c00077 | um03239   | 0         | um03239   | 14c00077 | 0         |
| BBH | 14c00067 | um11953   | 0         | um11953   | 14c00067 | 0         |
| BBH | 14d00042 | um03299   | 1.00E-114 | um03299   | 14d00042 | 1.00E-115 |
| NNN | 14c00003 | um03034   | 1.00E-159 | um03034   | 19c00045 | 0         |
| BBH | 14d00110 | um03169   | 0         | um03169   | 14d00110 | 0         |
| BBH | 14c00086 | um03229   | 0         | um03229   | 14c00086 | 0         |
| BBH | 14c00076 | um03240   | 1.00E-97  | um03240   | 14c00076 | 6.00E-93  |
| BBH | 14c00021 | um10657   | 5.00E-59  | um10657   | 14c00021 | 2.00E-58  |
| BBH | 14d00035 | um10837   | 1.00E-130 | um10837   | 14d00035 | 1.00E-127 |
| BBH | 14c00038 | um03305   | 0         | um03305   | 14c00038 | 0         |
| BBH | 14d00116 | um12209   | 0         | um12209   | 14d00116 | 0         |
| BBH | 14d00058 | um10953   | 7.00E-42  | um10953   | 14d00058 | 4.00E-35  |
| BBH | 14c00111 | um12210   | 1.00E-140 | um12210   | 14c00111 | 1.00E-155 |
| BBH | 14d00082 | um10642   | 1.00E-35  | um10642   | 14d00082 | 5.00E-36  |
| BBH | 14d00091 | um10380   | 0         | um10380   | 14d00091 | 0         |
| BBH | 14c00057 | um03273   | 0         | um03273   | 14c00057 | 0         |
| BBH | 14c00044 | um03294   | 1.00E-14  | um03294   | 14c00044 | 1.00E-14  |
| BBH | 14d00033 | um12221   | 9.00E-77  | um12221   | 14d00033 | 7.00E-81  |
| BBH | 14d00043 | um10831   | 6.00E-93  | um10831   | 14d00043 | 7.00E-93  |
| BBH | 14d00031 | um10653   | 0         | um10653   | 14d00031 | 0         |
| BBH | 14d00083 | um10640   | 1.00E-38  | um10640   | 14d00083 | 6.00E-39  |
| BBH | 14c00113 | um10382   | 1.00E-33  | um10382   | 14c00113 | 2.00E-39  |
| NNN | 14c00115 | um10383   | 1.00E-40  | um10383   | 14c00116 | 0         |
| BBH | 14c00089 | um10646   | 9.00E-31  | um10646   | 14c00089 | 5.00E-31  |
| BBH | 14d00071 | um12218   | 0         | um12218   | 14d00071 | 0         |
| BBH | 14d00115 | um03135   | 1.00E-79  | um03135   | 14d00115 | 8.00E-78  |
| BBH | 14d00009 | um03371   | 3.00E-74  | um03371   | 14d00009 | 3.00E-71  |
| BBH | 14d00099 | um03140   | 0         | um03140   | 14d00099 | 0         |
| BBH | 14c00134 | um03126   | 0         | um03126   | 14c00134 | 0         |
| BBH | 14d00023 | um03344   | 0         | um03344   | 14d00023 | 0         |
| BBH | 14d00090 | um03199   | 0         | um03199   | 14d00090 | 0         |
| BBH | 14d00014 | um03358   | 0         | um03358   | 14d00014 | 0         |
| BBH | 14d00060 | um11957   | 0         | um11957   | 14d00060 | 0         |
| BBH | 14c00103 | um10394   | 1.00E-82  | um10394   | 14c00103 | 2.00E-90  |
| BBH | 14c00128 | um10393   | 2.00E-40  | um10393   | 14c00128 | 1.00E-49  |
| BBH | 14c00020 | um03340   | 3.00E-36  | um03340   | 14c00020 | 5.00E-36  |
| BBH | 14d00077 | um10982   | 1.00E-30  | um10982   | 14d00077 | 1.00E-28  |
| BBH | 14c00013 | um11012   | 3.00E-74  | um11012   | 14c00013 | 3.00E-70  |
| NNN | 14c00018 | um12224   | 1.00E-171 |           |          |           |
| NNN | 14d00002 | um05411   | 3.00E-50  | um05411   | 15d00014 | 0         |
| BBH | 14c00002 | um03384   | 0         | um03384   | 14c00002 | 0         |
| BBH | 14c00054 | um10826   | 3.00E-42  | um10826   | 14c00054 | 2.00E-35  |
| BBH | 14c00079 | um03234.2 | 0         | um03234.2 | 14c00079 | 0         |
| BBH | 14c00037 | um03307   | 4.00E-94  | um03307   | 14c00037 | 1.00E-100 |
| NNN | 14c00087 | um03223   | 5.00E-21  | um03223   | 14d00078 | 1.00E-29  |
| BBH | 14d00064 | um12219   | 9.00E-82  | um12219   | 14d00064 | 1.00E-88  |
| BBH | 14c00116 | um10383   | 0         | um10383   | 14c00116 | 0         |
| BBH | 14c00114 | um03156   | 8.00E-95  | um03156   | 14c00114 | 1.00E-101 |
| BBH | 14c00055 | um10825   | 1.00E-102 | um10825   | 14c00055 | 1.00E-107 |
| BBH | 14c00047 | um10830   | 0         | um10830   | 14c00047 | 0         |
| BBH | 14d00034 | um10839   | 2.00E-61  | um10839   | 14d00034 | 2.00E-61  |
| BBH | 14c00125 | um10390   | 1.00E-81  | um10390   | 14c00125 | 9.00E-83  |
| BBH | 14d00084 | um03211   | 2.00E-97  | um03211   | 14d00084 | 1.00E-105 |
| BBH | 14d00057 | um10823   | 4.00E-14  | um10823   | 14d00057 | 5.00E-14  |
| BBH | 14d00013 | um03362   | 4.00E-69  | um03362   | 14d00013 | 8.00E-87  |
| BBH | 14d00048 | um03288   | 6.00E-31  | um03288   | 14d00048 | 7.00E-31  |
| BBH | 14d00024 | um10658   | 0         | um10658   | 14d00024 | 1.00E-171 |
| BBH | 14c00094 | um03210   | 1.00E-35  | um03210   | 14c00094 | 9.00E-36  |
| BBH | 14c00133 | um03128   | 1.00E-136 | um03128   | 14c00133 | 1.00E-136 |
| BBH | 14c00078 | um03237   | 5.00E-56  | um03237   | 14c00078 | 5.00E-56  |

|     |          |           |           |           |          |           |
|-----|----------|-----------|-----------|-----------|----------|-----------|
| BBH | 14c00036 | um03309   | 0         | um03309   | 14c00036 | 0         |
| BBH | 14c00073 | um03265   | 3.00E-63  | um03265   | 14c00073 | 4.00E-58  |
| BBH | 14c00109 | um10397   | 0         | um10397   | 14c00109 | 0         |
| NNN | 14c00120 | um03170   | 0         |           |          |           |
| BBH | 14d00118 | um11952   | 1.00E-163 | um11952   | 14d00118 | 1.00E-165 |
| BBH | 14c00104 | um03149   | 1.00E-164 | um03149   | 14c00104 | 1.00E-168 |
| BBH | 14d00054 | um03277   | 0         | um03277   | 14d00054 | 0         |
| BBH | 14d00063 | um03251   | 1.00E-44  | um03251   | 14d00063 | 1.00E-33  |
| NNN | 14d00044 | um03290   | 2.00E-34  | um03290   | 14d00045 | 1.00E-145 |
| BBH | 14c00049 | um03284   | 2.00E-38  | um03284   | 14c00049 | 2.00E-38  |
| BBH | 14d00112 | um10391   | 1.00E-173 | um10391   | 14d00112 | 1.00E-178 |
| BBH | 14d00098 | um03141   | 0         | um03141   | 14d00098 | 0         |
| BBH | 14c00093 | um10641   | 0         | um10641   | 14c00093 | 0         |
| BBH | 14d00016 | um03352   | 5.00E-61  | um03352   | 14d00016 | 1.00E-69  |
| BBH | 14c00029 | um03323   | 0         | um03323   | 14c00029 | 0         |
| BBH | 14c00046 | um03292   | 0         | um03292   | 14c00046 | 0         |
| BBH | 14d00040 | um10833   | 0         | um10833   | 14d00040 | 0         |
| BBH | 14d00038 | um03306   | 0         | um03306   | 14d00038 | 0         |
| BBH | 14d00045 | um03290   | 1.00E-145 | um03290   | 14d00045 | 1.00E-145 |
| BBH | 14c00041 | um03298   | 0         | um03298   | 14c00041 | 0         |
| BBH | 14c00034 | um03312   | 1.00E-164 | um03312   | 14c00034 | 1.00E-158 |
| BBH | 14c00117 | um10384   | 1.00E-52  | um10384   | 14c00117 | 2.00E-50  |
| BBH | 14d00085 | um10639   | 1.00E-135 | um10639   | 14d00085 | 1.00E-156 |
| BBH | 14c00064 | um03252   | 0         | um03252   | 14c00064 | 0         |
| BBH | 14d00121 | um02813   | 1.00E-166 | um02813   | 14d00121 | 1.00E-159 |
| BBH | 14c00110 | um10398   | 3.00E-79  | um10398   | 14c00110 | 3.00E-71  |
| BBH | 14d00005 | um03379   | 0         | um03379   | 14d00005 | 0         |
| BBH | 14d00052 | um03281   | 0         | um03281   | 14d00052 | 0         |
| BBH | 14d00097 | um03143   | 8.00E-76  | um03143   | 14d00097 | 6.00E-70  |
| NNN | 14c00080 | um03232   | 2.00E-21  | um03232   | 14c00083 | 2.00E-22  |
| NNN | 14d00076 | um03233   | 1.00E-141 |           |          |           |
| BBH | 14c00052 | um03280   | 0         | um03280   | 14c00052 | 0         |
| BBH | 14c00048 | um03285   | 0         | um03285   | 14c00048 | 0         |
| BBH | 14c00035 | um03310   | 1.00E-105 | um03310   | 14c00035 | 1.00E-111 |
| BBH | 14c00005 | um03381   | 1.00E-128 | um03381   | 14c00005 | 1.00E-124 |
| BBH | 14c00101 | um10400   | 1.00E-175 | um10400   | 14c00101 | 1.00E-175 |
| BBH | 14c00016 | um03355   | 6.00E-96  | um03355   | 14c00016 | 1.00E-89  |
| BBH | 14d00107 | um10385   | 0         | um10385   | 14d00107 | 0         |
| BBH | 14d00101 | um10396.2 | 0         | um10396.2 | 14d00101 | 0         |
| BBH | 14c00033 | um03315   | 0         | um03315   | 14c00033 | 0         |
| BBH | 14c00011 | um11014   | 0         | um11014   | 14c00011 | 0         |
| BBH | 14c00122 | um03167   | 1.00E-167 | um03167   | 14c00122 | 1.00E-166 |
| BBH | 14d00018 | um03351   | 0         | um03351   | 14d00018 | 0         |
| BBH | 14d00072 | um03241   | 1.00E-140 | um03241   | 14d00072 | 1.00E-140 |
| BBH | 14d00007 | um12228   | 7.00E-73  | um12228   | 14d00007 | 7.00E-77  |
| BBH | 14c00107 | um10381   | 4.00E-38  | um10381   | 14c00107 | 6.00E-37  |
| BBH | 14d00066 | um03262   | 0         | um03262   | 14d00066 | 0         |
| BBH | 14c00028 | um03325   | 0         | um03325   | 14c00028 | 0         |
| BBH | 14c00007 | um03376   | 0         | um03376   | 14c00007 | 0         |
| BBH | 14c00060 | um15098   | 1.00E-48  | um15098   | 14c00060 | 3.00E-45  |
| BBH | 14d00059 | um15004   | 0         | um15004   | 14d00059 | 0         |
| BBH | 14c00096 | um03206   | 0         | um03206   | 14c00096 | 0         |
| BBH | 14d00046 | um03289   | 1.00E-104 | um03289   | 14d00046 | 1.00E-79  |
| NNN | 14c00137 | um02021   | 9.00E-32  | um02021   | 22c00321 | 1.00E-137 |
| BBH | 14d00015 | um03356   | 0         | um03356   | 14d00015 | 0         |
| BBH | 14d00039 | um03303   | 0         | um03303   | 14d00039 | 0         |
| BBH | 14d00096 | um03144   | 0         | um03144   | 14d00096 | 0         |
| BBH | 14c00131 | um10379   | 0         | um10379   | 14c00131 | 0         |
| BBH | 14d00062 | um10651   | 1.00E-176 | um10651   | 14d00062 | 0         |
| BBH | 14c00118 | um10386   | 5.00E-96  | um10386   | 14c00118 | 1.00E-92  |
| BBH | 14d00087 | um15003   | 0         | um15003   | 14d00087 | 0         |
| BBH | 14d00030 | um10655   | 0         | um10655   | 14d00030 | 0         |

|     |          |           |           |           |          |           |
|-----|----------|-----------|-----------|-----------|----------|-----------|
| BBH | 14d00114 | um03180   | 0         | um03180   | 14d00114 | 0         |
| BBH | 14d00086 | um03207   | 4.00E-78  | um03207   | 14d00086 | 4.00E-78  |
| BBH | 14d00120 | um03124   | 1.00E-120 | um03124   | 14d00120 | 1.00E-122 |
| BBH | 14d00075 | um03235   | 0         | um03235   | 14d00075 | 0         |
| BBH | 14c00127 | um10392   | 1.00E-171 | um10392   | 14c00127 | 1.00E-165 |
| BBH | 14c00040 | um10832   | 6.00E-56  | um10832   | 14c00040 | 6.00E-56  |
| BBH | 14d00065 | um11955   | 1.00E-161 | um11955   | 14d00065 | 1.00E-162 |
| BBH | 14c00095 | um03209   | 0         | um03209   | 14c00095 | 0         |
| BBH | 14d00006 | um03377   | 1.00E-87  | um03377   | 14d00006 | 3.00E-99  |
| BBH | 14d00078 | um03223   | 2.00E-31  | um03223   | 14d00078 | 1.00E-29  |
| BBH | 14d00010 | um11013   | 0         | um11013   | 14d00010 | 0         |
| BBH | 14c00108 | um03139   | 4.00E-88  | um03139   | 14c00108 | 3.00E-90  |
| BBH | 14d00008 | um12227   | 6.00E-41  | um12227   | 14d00008 | 6.00E-41  |
| BBH | 14c00102 | um03136   | 9.00E-62  | um03136   | 14c00102 | 5.00E-60  |
| BBH | 14d00068 | um03264   | 0         | um03264   | 14d00068 | 0         |
| BBH | 14d00061 | um03246   | 0         | um03246   | 14d00061 | 0         |
| BBH | 14c00004 | um03382   | 0         | um03382   | 14c00004 | 0         |
| BBH | 14d00095 | um03145   | 2.00E-92  | um03145   | 14d00095 | 6.00E-90  |
| BBH | 14c00010 | um03368   | 9.00E-98  | um03368   | 14c00010 | 1.00E-110 |
| NNN | 15d00091 | um10339   | 1.00E-151 | um10339   | 19c00074 | 0         |
| BBH | 15d00002 | um02821   | 8.00E-27  | um02821   | 15d00002 | 2.00E-26  |
| BBH | 15d00013 | um05415   | 0         | um05415   | 15d00013 | 0         |
| BBH | 15d00063 | um05290   | 1.00E-140 | um05290   | 15d00063 | 1.00E-138 |
| BBH | 15c00043 | um05344   | 0         | um05344   | 15c00043 | 0         |
| BBH | 15c00019 | um05403   | 1.00E-134 | um05403   | 15c00019 | 1.00E-139 |
| BBH | 15d00053 | um05339   | 1.00E-113 | um05339   | 15d00053 | 1.00E-113 |
| BBH | 15d00071 | um05276   | 2.00E-51  | um05276   | 15d00071 | 2.00E-51  |
| BBH | 15d00056 | um05332   | 2.00E-48  | um05332   | 15d00056 | 3.00E-62  |
| BBH | 15d00083 | um05254   | 1.00E-95  | um05254   | 15d00083 | 5.00E-98  |
| BBH | 15c00024 | um05387   | 4.00E-95  | um05387   | 15c00024 | 1.00E-93  |
| BBH | 15c00022 | um05396.2 | 0         | um05396.2 | 15c00022 | 0         |
| BBH | 15d00030 | um05378   | 0         | um05378   | 15d00030 | 0         |
| BBH | 15d00025 | um05386   | 0         | um05386   | 15d00025 | 0         |
| NNN | 15c00094 | um03006   | 5.00E-25  | um03006   | 19c00058 | 1.00E-139 |
| BBH | 15c00065 | um05302   | 2.00E-25  | um05302   | 15c00065 | 2.00E-25  |
| BBH | 15d00041 | um05361   | 0         | um05361   | 15d00041 | 0         |
| NNN | 15d00001 | um06459   | 5.00E-16  | um06459   | 9c00018  | 2.00E-23  |
| NNN | 15c00092 | um01996   | 6.00E-81  |           |          |           |
| BBH | 15d00014 | um05411   | 0         | um05411   | 15d00014 | 0         |
| NNN | 15d00020 | um05395   | 0         |           |          |           |
| BBH | 15d00026 | um05385   | 1.00E-163 | um05385   | 15d00026 | 1.00E-169 |
| BBH | 15c00054 | um05328   | 0         | um05328   | 15c00054 | 0         |
| BBH | 15c00046 | um10200   | 0         | um10200   | 15c00046 | 0         |
| BBH | 15d00054 | um12083   | 1.00E-14  | um12083   | 15d00054 | 4.00E-14  |
| BBH | 15c00008 | um05429   | 1.00E-101 | um05429   | 15c00008 | 1.00E-122 |
| BBH | 15d00033 | um05370   | 3.00E-17  | um05370   | 15d00033 | 1.00E-20  |
| BBH | 15d00064 | um10552   | 0         | um10552   | 15d00064 | 0         |
| BBH | 15d00032 | um05373   | 0         | um05373   | 15d00032 | 0         |
| BBH | 15c00085 | um05255   | 2.00E-40  | um05255   | 15c00085 | 2.00E-40  |
| BBH | 15c00021 | um05398.2 | 0         | um05398.2 | 15c00021 | 0         |
| BBH | 15c00010 | um05420   | 0         | um05420   | 15c00010 | 0         |
| BBH | 15c00064 | um05306   | 5.00E-25  | um05306   | 15c00064 | 3.00E-21  |
| BBH | 15d00008 | um05428   | 1.00E-62  | um05428   | 15d00008 | 8.00E-64  |
| BBH | 15c00084 | um10546   | 1.00E-59  | um10546   | 15c00084 | 5.00E-53  |
| BBH | 15c00070 | um10705   | 1.00E-153 | um10705   | 15c00070 | 1.00E-153 |
| BBH | 15c00059 | um10558   | 0         | um10558   | 15c00059 | 0         |
| BBH | 15c00023 | um05392   | 0         | um05392   | 15c00023 | 0         |
| BBH | 15d00074 | um05273   | 0         | um05273   | 15d00074 | 0         |
| NNN | 15d00086 | um10713.2 | 7.00E-12  | um10713.2 | 3d00087  | 1.00E-89  |
| NNN | 15d00093 | um06418   | 7.00E-96  | um06418   | 1c00034  | 0         |
| BBH | 15c00079 | um05261   | 0         | um05261   | 15c00079 | 0         |
| BBH | 15d00011 | um05421   | 0         | um05421   | 15d00011 | 0         |

|     |          |           |           |           |          |           |
|-----|----------|-----------|-----------|-----------|----------|-----------|
| BBH | 15d00058 | um05327   | 2.00E-69  | um05327   | 15d00058 | 1.00E-78  |
| BBH | 15c00053 | um15101   | 4.00E-58  | um15101   | 15c00053 | 5.00E-58  |
| BBH | 15d00073 | um05274   | 0         | um05274   | 15d00073 | 0         |
| NNN | 15d00007 | um05431   | 1.00E-91  |           |          |           |
| NNN | 15c00087 | um04806   | 2.00E-48  | um04806   | 26c00044 | 0         |
| BBH | 15c00006 | um05433   | 0         | um05433   | 15c00006 | 0         |
| NNN | 15c00077 | um00372   | 5.00E-61  | um00372   | 9d00180  | 0         |
| BBH | 15c00003 | um05619   | 1.00E-168 | um05619   | 15c00003 | 1.00E-157 |
| BBH | 15c00033 | um05364   | 1.00E-173 | um05364   | 15c00033 | 0         |
| BBH | 15c00076 | um10548   | 3.00E-97  | um10548   | 15c00076 | 3.00E-91  |
| BBH | 15d00028 | um05381   | 0         | um05381   | 15d00028 | 0         |
| BBH | 15c00063 | um05308   | 2.00E-32  | um05308   | 15c00063 | 8.00E-30  |
| BBH | 15c00078 | um05269   | 0         | um05269   | 15c00078 | 0         |
| BBH | 15c00020 | um10215   | 1.00E-126 | um10215   | 15c00020 | 1.00E-133 |
| BBH | 15c00018 | um05405   | 0         | um05405   | 15c00018 | 0         |
| BBH | 15d00055 | um05334   | 5.00E-92  | um05334   | 15d00055 | 5.00E-92  |
| BBH | 15d00012 | um05417   | 0         | um05417   | 15d00012 | 0         |
| BBH | 15c00062 | um05414   | 0         | um05414   | 15c00062 | 0         |
| BBH | 15d00066 | um05286.2 | 1.00E-139 | um05286.2 | 15d00066 | 1.00E-139 |
| BBH | 15d00022 | um05391   | 1.00E-112 | um05391   | 15d00022 | 1.00E-105 |
| BBH | 15c00005 | um05435   | 1.00E-104 | um05435   | 15c00005 | 2.00E-91  |
| BBH | 15d00038 | um05365   | 0         | um05365   | 15d00038 | 0         |
| BBH | 15d00039 | um05363   | 0         | um05363   | 15d00039 | 1.00E-169 |
| BBH | 15d00029 | um10213   | 0         | um10213   | 15d00029 | 0         |
| BBH | 15d00021 | um05393   | 0         | um05393   | 15d00021 | 0         |
| BBH | 15c00086 | um05253   | 0         | um05253   | 15c00086 | 0         |
| BBH | 15c00034 | um05358   | 3.00E-26  | um05358   | 15c00034 | 4.00E-21  |
| BBH | 15d00076 | um05270   | 1.00E-58  | um05270   | 15d00076 | 4.00E-60  |
| BBH | 15d00040 | um05362   | 0         | um05362   | 15d00040 | 0         |
| BBH | 15c00017 | um05406   | 2.00E-80  | um05406   | 15c00017 | 2.00E-76  |
| BBH | 15c00040 | um05347   | 0         | um05347   | 15c00040 | 0         |
| BBH | 15d00006 | um05432.2 | 0         | um05432.2 | 15d00006 | 0         |
| BBH | 15d00079 | um05265   | 2.00E-29  | um05265   | 15d00079 | 2.00E-29  |
| BBH | 15c00056 | um05325   | 0         | um05325   | 15c00056 | 0         |
| BBH | 15d00088 | um10544   | 1.00E-93  | um10544   | 15d00088 | 3.00E-93  |
| BBH | 15d00004 | um06478   | 0         | um06478   | 15d00004 | 0         |
| BBH | 15c00028 | um05377   | 1.00E-105 | um05377   | 15c00028 | 1.00E-103 |
| NNN | 15c00091 | um00919   | 1.00E-102 | um00919   | 7d00317  | 1.00E-149 |
| BBH | 15c00016 | um05407   | 0         | um05407   | 15c00016 | 0         |
| NNN | 15c00002 | um00646   | 3.00E-48  | um00646   | 9d00317  | 1.00E-149 |
| BBH | 15d00036 | um05368   | 2.00E-39  | um05368   | 15d00036 | 4.00E-39  |
| BBH | 15c00035 | um05356   | 3.00E-49  | um05356   | 15c00035 | 2.00E-62  |
| BBH | 15d00078 | um05264   | 0         | um05264   | 15d00078 | 1.00E-174 |
| BBH | 15d00017 | um05404.2 | 1.00E-146 | um05404.2 | 15d00017 | 1.00E-107 |
| BBH | 15d00005 | um05434   | 1.00E-117 | um05434   | 15d00005 | 1.00E-121 |
| BBH | 15d00052 | um05345   | 1.00E-134 | um05345   | 15d00052 | 1.00E-130 |
| BBH | 15d00067 | um12301   | 4.00E-66  | um12301   | 15d00067 | 3.00E-69  |
| BBH | 15c00055 | um05326   | 0         | um05326   | 15c00055 | 0         |
| BBH | 15d00059 | um10559   | 0         | um10559   | 15d00059 | 0         |
| BBH | 15d00043 | um10206   | 0         | um10206   | 15d00043 | 0         |
| BBH | 15c00074 | um10551.2 | 0         | um10551.2 | 15c00074 | 0         |
| BBH | 15d00075 | um05271   | 1.00E-173 | um05271   | 15d00075 | 1.00E-172 |
| BBH | 15c00048 | um05338   | 1.00E-125 | um05338   | 15c00048 | 1.00E-132 |
| BBH | 15d00080 | um05267   | 1.00E-70  | um05267   | 15d00080 | 2.00E-70  |
| BBH | 15c00009 | um05422   | 0         | um05422   | 15c00009 | 0         |
| NNN | 15d00087 | um00005   | 1.00E-32  | um00005   | 9c00018  | 0         |
| BBH | 15d00003 | um03046   | 1.00E-29  | um03046   | 15d00003 | 3.00E-29  |
| BBH | 15c00015 | um05408   | 0         | um05408   | 15c00015 | 0         |
| NNN | 15c00001 | um01099   | 1.00E-17  | um01099   | 7c00216  | 1.00E-154 |
| BBH | 15c00036 | um05355   | 0         | um05355   | 15c00036 | 0         |
| BBH | 15c00081 | um05266   | 1.00E-153 | um05266   | 15c00081 | 1.00E-161 |
| BBH | 15c00027 | um05380   | 7.00E-68  | um05380   | 15c00027 | 6.00E-64  |

|     |          |           |           |           |          |           |
|-----|----------|-----------|-----------|-----------|----------|-----------|
| BBH | 15d00070 | um05278   | 6.00E-64  | um05278   | 15d00070 | 4.00E-70  |
| BBH | 15d00077 | um05263   | 1.00E-113 | um05263   | 15d00077 | 1.00E-105 |
| BBH | 15d00082 | um05256   | 1.00E-158 | um05256   | 15d00082 | 1.00E-160 |
| BBH | 15d00037 | um05366   | 8.00E-60  | um05366   | 15d00037 | 7.00E-58  |
| BBH | 15d00057 | um05329   | 0         | um05329   | 15d00057 | 0         |
| NNN | 15c00088 | um01269   | 8.00E-79  | um01269   | 7d00135  | 0         |
| BBH | 15c00075 | um10549   | 1.00E-116 | um10549   | 15c00075 | 1.00E-114 |
| NNN | 15d00090 | um03207   | 5.00E-30  | um03207   | 14d00086 | 4.00E-78  |
| BBH | 15c00004 | um06477   | 3.00E-48  | um06477   | 15c00004 | 2.00E-47  |
| BBH | 15c00050 | um05335   | 2.00E-64  | um05335   | 15c00050 | 8.00E-62  |
| BBH | 15c00069 | um05292   | 0         | um05292   | 15c00069 | 0         |
| BBH | 15d00068 | um05282   | 3.00E-72  | um05282   | 15d00068 | 5.00E-74  |
| BBH | 15c00068 | um05293   | 0         | um05293   | 15c00068 | 0         |
| BBH | 15c00047 | um05340   | 1.00E-128 | um05340   | 15c00047 | 1.00E-119 |
| BBH | 15c00030 | um10211   | 0         | um10211   | 15c00030 | 0         |
| BBH | 15d00044 | um05357   | 0         | um05357   | 15d00044 | 0         |
| BBH | 15d00018 | um05402   | 1.00E-134 | um05402   | 15d00018 | 1.00E-140 |
| BBH | 15d00060 | um10556   | 2.00E-20  | um10556   | 15d00060 | 2.00E-20  |
| BBH | 15d00042 | um10207   | 0         | um10207   | 15d00042 | 0         |
| NNN | 15c00037 | um05353   | 0         |           |          |           |
| BBH | 15d00023 | um05390   | 1.00E-110 | um05390   | 15d00023 | 1.00E-110 |
| BBH | 15d00034 | um10210.2 | 1.00E-102 | um10210.2 | 15d00034 | 6.00E-98  |
| BBH | 15d00081 | um05258   | 1.00E-134 | um05258   | 15d00081 | 1.00E-138 |
| BBH | 15c00007 | um15066   | 0         | um15066   | 15c00007 | 0         |
| BBH | 15c00083 | um05259   | 1.00E-153 | um05259   | 15c00083 | 1.00E-156 |
| BBH | 15c00012 | um10220   | 1.00E-174 | um10220   | 15c00012 | 1.00E-174 |
| BBH | 15c00026 | um05382   | 0         | um05382   | 15c00026 | 0         |
| BBH | 15c00052 | um05331   | 3.00E-64  | um05331   | 15c00052 | 3.00E-69  |
| BBH | 15c00014 | um05412   | 0         | um05412   | 15c00014 | 0         |
| BBH | 15c00049 | um05337   | 1.00E-146 | um05337   | 15c00049 | 1.00E-152 |
| BBH | 15d00045 | um05354.2 | 3.00E-93  | um05354.2 | 15d00045 | 9.00E-88  |
| BBH | 15c00058 | um10560   | 1.00E-63  | um10560   | 15c00058 | 9.00E-61  |
| BBH | 15c00067 | um05295   | 3.00E-16  | um05295   | 15c00067 | 4.00E-16  |
| BBH | 15d00048 | um05348   | 0         | um05348   | 15d00048 | 0         |
| BBH | 15c00031 | um05371   | 1.00E-128 | um05371   | 15c00031 | 1.00E-126 |
| BBH | 15d00015 | um05410   | 2.00E-79  | um05410   | 15d00015 | 1.00E-73  |
| BBH | 15c00038 | um05351   | 0         | um05351   | 15c00038 | 1.00E-176 |
| BBH | 15c00051 | um05333   | 1.00E-142 | um05333   | 15c00051 | 1.00E-149 |
| BBH | 15d00072 | um05275   | 0         | um05275   | 15d00072 | 0         |
| BBH | 15c00071 | um05287   | 1.00E-178 | um05287   | 15c00071 | 1.00E-157 |
| BBH | 15d00010 | um05423   | 0         | um05423   | 15d00010 | 0         |
| NNN | 15d00092 | um10339   | 0         | um10339   | 19c00074 | 0         |
| BBH | 15d00024 | um10214   | 4.00E-35  | um10214   | 15d00024 | 2.00E-34  |
| NNN | 15d00035 | um10209   | 0         |           |          |           |
| BBH | 15c00041 | um05346   | 0         | um05346   | 15c00041 | 0         |
| NNN | 15d00089 | um06418   | 2.00E-69  | um06418   | 1c00034  | 0         |
| NNN | 15d00069 | um05280   | 8.00E-45  |           |          |           |
| BBH | 15c00013 | um05416   | 0         | um05416   | 15c00013 | 0         |
| BBH | 15c00011 | um10221   | 1.00E-104 | um10221   | 15c00011 | 1.00E-102 |
| BBH | 15c00025 | um05383   | 0         | um05383   | 15c00025 | 0         |
| BBH | 15c00082 | um05260   | 0         | um05260   | 15c00082 | 0         |
| BBH | 15c00032 | um10208   | 1.00E-13  | um10208   | 15c00032 | 6.00E-12  |
| BBH | 15d00084 | um05252   | 1.00E-139 | um05252   | 15d00084 | 1.00E-139 |
| BBH | 15d00046 | um05352   | 1.00E-175 | um05352   | 15d00046 | 1.00E-171 |
| BBH | 15c00057 | um10561   | 0         | um10561   | 15c00057 | 0         |
| BBH | 15c00073 | um05283   | 1.00E-121 | um05283   | 15c00073 | 1.00E-121 |
| BBH | 15d00019 | um05401   | 0         | um05401   | 15d00019 | 0         |
| BBH | 15c00039 | um05349   | 0         | um05349   | 15c00039 | 0         |
| BBH | 15d00062 | um05291   | 1.00E-127 | um05291   | 15d00062 | 1.00E-110 |
| BBH | 15c00080 | um05262   | 0         | um05262   | 15c00080 | 0         |
| NNN | 15c00072 | um05285   | 0         |           |          |           |
| NNN | 16c00002 | um11741   | 4.00E-52  | um11741   | 13d00061 | 1.00E-150 |



|     |          |           |           |           |          |           |
|-----|----------|-----------|-----------|-----------|----------|-----------|
| BBH | 16c00039 | um05515   | 3.00E-16  | um05515   | 16c00039 | 2.00E-17  |
| BBH | 16d00050 | um05540   | 0         | um05540   | 16d00050 | 0         |
| BBH | 16c00043 | um05522   | 0         | um05522   | 16c00043 | 0         |
| BBH | 16d00086 | um05608   | 1.00E-42  | um05608   | 16d00086 | 3.00E-43  |
| BBH | 16d00041 | um05527   | 0         | um05527   | 16d00041 | 0         |
| BBH | 16c00070 | um05567   | 2.00E-62  | um05567   | 16c00070 | 3.00E-63  |
| BBH | 16c00068 | um10896   | 0         | um10896   | 16c00068 | 0         |
| BBH | 16c00046 | um05526   | 1.00E-84  | um05526   | 16c00046 | 2.00E-91  |
| BBH | 16d00048 | um10355   | 5.00E-57  | um10355   | 16d00048 | 2.00E-57  |
| BBH | 16d00033 | um12305   | 0         | um12305   | 16d00033 | 0         |
| BBH | 16d00070 | um05583   | 2.00E-31  | um05583   | 16d00070 | 2.00E-34  |
| BBH | 16d00077 | um05588   | 1.00E-166 | um05588   | 16d00077 | 1.00E-176 |
| BBH | 16c00033 | um05501   | 0         | um05501   | 16c00033 | 0         |
| BBH | 16c00089 | um05612   | 1.00E-166 | um05612   | 16c00089 | 1.00E-165 |
| BBH | 16c00062 | um05557   | 0         | um05557   | 16c00062 | 0         |
| BBH | 16c00077 | um11178   | 5.00E-55  | um11178   | 16c00077 | 4.00E-50  |
| BBH | 16d00064 | um05570   | 6.00E-88  | um05570   | 16d00064 | 2.00E-92  |
| BBH | 16d00021 | um10751   | 1.00E-160 | um10751   | 16d00021 | 1.00E-164 |
| BBH | 16c00026 | um05490   | 1.00E-81  | um05490   | 16c00026 | 6.00E-83  |
| BBH | 16c00082 | um12308   | 2.00E-99  | um12308   | 16c00082 | 1.00E-106 |
| BBH | 16c00090 | um11182   | 9.00E-46  | um11182   | 16c00090 | 1.00E-45  |
| BBH | 16d00018 | um05472   | 6.00E-55  | um05472   | 16d00018 | 6.00E-55  |
| BBH | 16d00056 | um05552   | 1.00E-118 | um05552   | 16d00056 | 1.00E-123 |
| BBH | 16d00082 | um05605   | 1.00E-146 | um05605   | 16d00082 | 1.00E-157 |
| BBH | 16d00087 | um11513   | 0         | um11513   | 16d00087 | 0         |
| BBH | 16d00076 | um05592   | 0         | um05592   | 16d00076 | 0         |
| BBH | 16c00059 | um11792   | 1.00E-124 | um11792   | 16c00059 | 1.00E-109 |
| BBH | 16c00078 | um11179   | 3.00E-71  | um11179   | 16c00078 | 2.00E-67  |
| BBH | 16c00001 | um04697   | 0         | um04697   | 16c00001 | 0         |
| BBH | 16c00016 | um10747   | 3.00E-91  | um10747   | 16c00016 | 4.00E-92  |
| BBH | 16c00067 | um05563   | 0         | um05563   | 16c00067 | 0         |
| NNN | 16c00030 | um05496   | 0         |           |          |           |
| BBH | 16d00047 | um10357   | 0         | um10357   | 16d00047 | 0         |
| BBH | 16c00071 | um05569   | 9.00E-49  | um05569   | 16c00071 | 2.00E-48  |
| BBH | 16c00054 | um05542   | 0         | um05542   | 16c00054 | 0         |
| BBH | 16d00042 | um05528   | 1.00E-154 | um05528   | 16d00042 | 1.00E-155 |
| BBH | 16c00034 | um05505   | 1.00E-46  | um05505   | 16c00034 | 2.00E-45  |
| NNN | 16c00088 | um05602   | 1.00E-21  | um05602   | 16d00084 | 0         |
| BBH | 16c00061 | um11794   | 1.00E-36  | um11794   | 16c00061 | 4.00E-35  |
| BBH | 16d00039 | um05520   | 4.00E-61  | um05520   | 16d00039 | 9.00E-58  |
| BBH | 16d00022 | um05480   | 0         | um05480   | 16d00022 | 0         |
| BBH | 16d00027 | um10758.2 | 1.00E-62  | um10758.2 | 16d00027 | 6.00E-71  |
| BBH | 16d00015 | um05466   | 1.00E-117 | um05466   | 16d00015 | 1.00E-119 |
| BBH | 16c00023 | um10753   | 8.00E-44  | um10753   | 16c00023 | 9.00E-44  |
| BBH | 16d00081 | um05601   | 0         | um05601   | 16d00081 | 0         |
| BBH | 16c00091 | um05609   | 0         | um05609   | 16c00091 | 0         |
| BBH | 16d00053 | um05545   | 7.00E-83  | um05545   | 16d00053 | 1.00E-94  |
| BBH | 16d00061 | um05564   | 0         | um05564   | 16d00061 | 0         |
| BBH | 16c00057 | um05549   | 0         | um05549   | 16c00057 | 0         |
| BBH | 16d00062 | um10895   | 2.00E-82  | um10895   | 16d00062 | 1.00E-141 |
| BBH | 16d00009 | um05449   | 0         | um05449   | 16d00009 | 0         |
| BBH | 16c00015 | um05465   | 2.00E-72  | um05465   | 16c00015 | 3.00E-90  |
| BBH | 16c00076 | um05581   | 0         | um05581   | 16c00076 | 0         |
| BBH | 16c00084 | um11181   | 1.00E-173 | um11181   | 16c00084 | 1.00E-168 |
| BBH | 16c00051 | um10356   | 1.00E-140 | um10356   | 16c00051 | 1.00E-136 |
| BBH | 16c00010 | um05445   | 8.00E-73  | um05445   | 16c00010 | 4.00E-72  |
| BBH | 16c00075 | um11176   | 2.00E-29  | um11176   | 16c00075 | 2.00E-30  |
| BBH | 16d00079 | um05598   | 2.00E-77  | um05598   | 16d00079 | 2.00E-77  |
| NNN | 16d00080 | um10846   | 4.00E-65  | um10846   | 11c00016 | 1.00E-178 |
| NNN | 16d00069 | um11177   | 2.00E-60  | um11177   | 16d00068 | 1.00E-65  |
| BBH | 16d00016 | um05467   | 1.00E-169 | um05467   | 16d00016 | 1.00E-163 |
| BBH | 16d00013 | um05458   | 0         | um05458   | 16d00013 | 0         |

|     |          |           |           |           |          |           |
|-----|----------|-----------|-----------|-----------|----------|-----------|
| BBH | 16d00067 | um05579   | 0         | um05579   | 16d00067 | 0         |
| BBH | 16c00024 | um05486   | 5.00E-98  | um05486   | 16c00024 | 1.00E-102 |
| BBH | 16c00029 | um05495   | 5.00E-41  | um05495   | 16c00029 | 1.00E-42  |
| BBH | 16d00054 | um05547   | 1.00E-126 | um05547   | 16d00054 | 1.00E-130 |
| BBH | 16c00041 | um10350   | 0         | um10350   | 16c00041 | 0         |
| BBH | 16d00030 | um05506   | 0         | um05506   | 16d00030 | 0         |
| BBH | 16c00031 | um10759   | 1.00E-14  | um10759   | 16c00031 | 1.00E-15  |
| BBH | 16c00052 | um05533   | 1.00E-173 | um05533   | 16c00052 | 1.00E-171 |
| BBH | 16c00058 | um11790   | 0         | um11790   | 16c00058 | 0         |
| BBH | 16c00037 | um10348   | 1.00E-61  | um10348   | 16c00037 | 2.00E-69  |
| BBH | 16d00072 | um05596   | 1.00E-132 | um05596   | 16d00072 | 1.00E-131 |
| BBH | 16c00044 | um10351   | 3.00E-77  | um10351   | 16c00044 | 2.00E-71  |
| BBH | 16d00078 | um05586   | 1.00E-158 | um05586   | 16d00078 | 1.00E-158 |
| BBH | 16c00065 | um11795   | 2.00E-59  | um11795   | 16c00065 | 9.00E-66  |
| BBH | 16d00049 | um05538   | 1.00E-138 | um05538   | 16d00049 | 1.00E-139 |
| BBH | 16d00051 | um05541   | 7.00E-22  | um05541   | 16d00051 | 2.00E-21  |
| BBH | 16d00020 | um05475   | 2.00E-53  | um05475   | 16d00020 | 1.00E-47  |
| BBH | 16c00083 | um05597   | 1.00E-159 | um05597   | 16c00083 | 1.00E-164 |
| BBH | 16d00014 | um10746.2 | 1.00E-115 | um10746.2 | 16d00014 | 1.00E-115 |
| BBH | 16d00068 | um11177   | 5.00E-66  | um11177   | 16d00068 | 1.00E-65  |
| BBH | 16d00071 | um05584   | 0         | um05584   | 16d00071 | 0         |
| BBH | 16d00024 | um05485   | 0         | um05485   | 16d00024 | 0         |
| NNN | 16d00085 | um05610   | 0         | um05610   | 11c00016 | 1.00E-110 |
| BBH | 16c00021 | um05481   | 0         | um05481   | 16c00021 | 0         |
| BBH | 16c00018 | um10749   | 0         | um10749   | 16c00018 | 0         |
| BBH | 16c00032 | um05498   | 0         | um05498   | 16c00032 | 0         |
| BBH | 16d00029 | um05507   | 1.00E-163 | um05507   | 16d00029 | 1.00E-163 |
| BBH | 16c00049 | um05531   | 0         | um05531   | 16c00049 | 0         |
| BBH | 16c00007 | um11575   | 4.00E-93  | um11575   | 16c00007 | 3.00E-98  |
| BBH | 16d00040 | um05525   | 3.00E-80  | um05525   | 16d00040 | 1.00E-81  |
| BBH | 16d00059 | um05555   | 2.00E-47  | um05555   | 16d00059 | 4.00E-43  |
| BBH | 16c00086 | um05604   | 1.00E-53  | um05604   | 16c00086 | 2.00E-53  |
| BBH | 16c00038 | um05512   | 2.00E-82  | um05512   | 16c00038 | 2.00E-70  |
| BBH | 16d00052 | um05543   | 1.00E-168 | um05543   | 16d00052 | 1.00E-162 |
| BBH | 16d00011 | um05453   | 1.00E-89  | um05453   | 16d00011 | 3.00E-97  |
| BBH | 16d00057 | um11791   | 8.00E-81  | um11791   | 16d00057 | 4.00E-80  |
| BBH | 16d00036 | um05511   | 1.00E-109 | um05511   | 16d00036 | 1.00E-109 |
| BBH | 16d00026 | um05494   | 0         | um05494   | 16d00026 | 0         |
| BBH | 16d00065 | um05574   | 1.00E-115 | um05574   | 16d00065 | 1.00E-110 |
| BBH | 16c00017 | um05470   | 0         | um05470   | 16c00017 | 1.00E-174 |
| BBH | 16c00047 | um10352   | 7.00E-50  | um10352   | 16c00047 | 2.00E-49  |
| BBH | 16c00055 | um05544   | 0         | um05544   | 16c00055 | 0         |
| BBH | 16d00004 | um11113   | 5.00E-87  | um11113   | 16d00004 | 1.00E-100 |
| BBH | 16c00012 | um05450   | 0         | um05450   | 16c00012 | 0         |
| BBH | 16d00010 | um05452.2 | 3.00E-93  | um05452.2 | 16d00010 | 1.00E-102 |
| BBH | 16d00008 | um05446   | 1.00E-104 | um05446   | 16d00008 | 3.00E-97  |
| BBH | 16c00050 | um10359   | 7.00E-67  | um10359   | 16c00050 | 7.00E-67  |
| BBH | 16c00006 | um11574   | 7.00E-59  | um11574   | 16c00006 | 3.00E-59  |
| BBH | 16d00035 | um05509   | 6.00E-60  | um05509   | 16d00035 | 5.00E-56  |
| BBH | 16d00074 | um05595   | 4.00E-54  | um05595   | 16d00074 | 5.00E-55  |
| BBH | 16c00042 | um05521   | 0         | um05521   | 16c00042 | 0         |
| BBH | 16d00032 | um05502   | 6.00E-86  | um05502   | 16d00032 | 3.00E-86  |
| BBH | 16d00023 | um05482   | 0         | um05482   | 16d00023 | 0         |
| BBH | 16d00019 | um05473   | 1.00E-160 | um05473   | 16d00019 | 1.00E-151 |
| BBH | 16d00012 | um11577   | 0         | um11577   | 16d00012 | 0         |
| BBH | 16c00022 | um12304   | 4.00E-45  | um12304   | 16c00022 | 7.00E-44  |
| BBH | 16d00058 | um05554   | 1.00E-100 | um05554   | 16d00058 | 1.00E-118 |
| BBH | 16c00027 | um10756   | 1.00E-126 | um10756   | 16c00027 | 1.00E-126 |
| BBH | 16c00035 | um05503   | 0         | um05503   | 16c00035 | 0         |
| BBH | 16c00040 | um10349   | 3.00E-20  | um10349   | 16c00040 | 2.00E-18  |
| BBH | 16c00009 | um05443   | 0         | um05443   | 16c00009 | 0         |
| BBH | 16c00011 | um05447   | 2.00E-99  | um05447   | 16c00011 | 2.00E-94  |

|     |          |           |           |           |          |           |
|-----|----------|-----------|-----------|-----------|----------|-----------|
| BBH | 16d00066 | um05577   | 0         | um05577   | 16d00066 | 0         |
| BBH | 16d00038 | um05518   | 1.00E-59  | um05518   | 16d00038 | 9.00E-63  |
| BBH | 16c00085 | um05606   | 4.00E-88  | um05606   | 16c00085 | 3.00E-88  |
| BBH | 16c00056 | um05546   | 1.00E-134 | um05546   | 16c00056 | 1.00E-135 |
| BBH | 16c00005 | um05439   | 2.00E-84  | um05439   | 16c00005 | 4.00E-85  |
| BBH | 16c00074 | um05575   | 1.00E-167 | um05575   | 16c00074 | 1.00E-174 |
| BBH | 16c00066 | um05562   | 1.00E-117 | um05562   | 16c00066 | 1.00E-108 |
| BBH | 16c00079 | um05591   | 1.00E-85  | um05591   | 16c00079 | 6.00E-82  |
| BBH | 16d00017 | um10748   | 0         | um10748   | 16d00017 | 0         |
| BBH | 16d00028 | um05499   | 1.00E-122 | um05499   | 16d00028 | 1.00E-114 |
| BBH | 16d00055 | um05548   | 0         | um05548   | 16d00055 | 0         |
| BBH | 16c00028 | um05493   | 4.00E-70  | um05493   | 16c00028 | 3.00E-75  |
| BBH | 16c00036 | um10347   | 0         | um10347   | 16c00036 | 0         |
| BBH | 16d00075 | um05593   | 2.00E-22  | um05593   | 16d00075 | 1.00E-15  |
| BBH | 16c00081 | um05589   | 3.00E-40  | um05589   | 16c00081 | 1.00E-40  |
| BBH | 16c00069 | um12307   | 0         | um12307   | 16c00069 | 0         |
| BBH | 16d00043 | um10353   | 7.00E-79  | um10353   | 16d00043 | 1.00E-74  |
| BBH | 16c00064 | um05560   | 0         | um05560   | 16c00064 | 0         |
| NNN | 16d00002 | um03403.2 | 3.00E-11  | um03403.2 | 8d00113  | 0         |
| BBH | 16d00006 | um05442   | 1.00E-148 | um05442   | 16d00006 | 1.00E-139 |
| BBH | 16d00046 | um05537   | 0         | um05537   | 16d00046 | 1.00E-168 |
| BBH | 16c00019 | um10750   | 0         | um10750   | 16c00019 | 0         |
| BBH | 16c00072 | um05571   | 1.00E-147 | um05571   | 16c00072 | 1.00E-147 |
| BBH | 16c00004 | um04490   | 7.00E-38  | um04490   | 16c00004 | 2.00E-37  |
| BBH | 16d00031 | um05504   | 0         | um05504   | 16d00031 | 0         |
| BBH | 16d00060 | um05559   | 0         | um05559   | 16d00060 | 0         |
| BBH | 16c00014 | um11578   | 1.00E-117 | um11578   | 16c00014 | 1.00E-124 |
| BBH | 16d00025 | um05489   | 1.00E-161 | um05489   | 16d00025 | 1.00E-177 |
| BBH | 16c00025 | um10755   | 1.00E-39  | um10755   | 16c00025 | 7.00E-39  |
| BBH | 16c00092 | um12309   | 0         | um12309   | 16c00092 | 0         |
| NNN | 16d00084 | um01656   | 3.00E-70  | um01656   | 22c00121 | 0         |
| BBH | 16d00037 | um05514   | 1.00E-175 | um05514   | 16d00037 | 1.00E-176 |
| NNN | 16d00034 | um05509   | 2.00E-45  | um05509   | 16d00035 | 5.00E-56  |
| BBH | 16c00063 | um05558   | 0         | um05558   | 16c00063 | 0         |
| BBH | 16c00087 | um05603   | 1.00E-162 | um05603   | 16c00087 | 1.00E-162 |
| BBH | 16d00005 | um05438   | 1.00E-162 | um05438   | 16d00005 | 0         |
| BBH | 16c00053 | um05539   | 5.00E-96  | um05539   | 16c00053 | 6.00E-95  |
| BBH | 16d00045 | um12306   | 7.00E-97  | um12306   | 16d00045 | 3.00E-97  |
| BBH | 16c00073 | um05572   | 1.00E-159 | um05572   | 16c00073 | 1.00E-158 |
| BBH | 16d00044 | um10354   | 1.00E-130 | um10354   | 16d00044 | 1.00E-124 |
| NNN | 16d00001 | um10815   | 4.00E-99  | um10815   | 22d00064 | 0         |
| BBH | 16d00063 | um05568   | 0         | um05568   | 16d00063 | 0         |
| BBH | 16c00020 | um05478   | 1.00E-101 | um05478   | 16c00020 | 7.00E-97  |
| BBH | 16c00013 | um05454   | 1.00E-116 | um05454   | 16c00013 | 1.00E-120 |
| BBH | 18c00022 | um10420   | 6.00E-39  | um10420   | 18c00022 | 7.00E-39  |
| NNN | 18d00020 | um10423   | 1.00E-74  |           |          |           |
| BBH | 18c00030 | um10414   | 2.00E-69  | um10414   | 18c00030 | 7.00E-75  |
| BBH | 18d00084 | um04157   | 2.00E-97  | um04157   | 18d00084 | 3.00E-99  |
| NNN | 18c00046 | um04220   | 1.00E-39  | um04220   | 18c00047 | 3.00E-88  |
| NNN | 18c00012 | um04293   | 9.00E-21  | um04293   | 18c00006 | 0         |
| BBH | 18c00070 | um10893   | 1.00E-119 | um10893   | 18c00070 | 1.00E-119 |
| BBH | 18c00077 | um10889   | 0         | um10889   | 18c00077 | 0         |
| BBH | 18c00064 | um11121   | 9.00E-25  | um11121   | 18c00064 | 1.00E-24  |
| BBH | 18d00042 | um04225.2 | 0         | um04225.2 | 18d00042 | 0         |
| BBH | 18c00002 | um04299   | 0         | um04299   | 18c00002 | 0         |
| BBH | 18c00027 | um04251   | 1.00E-169 | um04251   | 18c00027 | 1.00E-165 |
| BBH | 18d00057 | um11129   | 2.00E-65  | um11129   | 18d00057 | 2.00E-56  |
| BBH | 18c00038 | um04229   | 2.00E-37  | um04229   | 18c00038 | 4.00E-37  |
| BBH | 18c00085 | um04147   | 0         | um04147   | 18c00085 | 0         |
| NNN | 18d00095 | um12254   | 0         |           |          |           |
| BBH | 18d00109 | um04092   | 2.00E-83  | um04092   | 18d00109 | 7.00E-83  |
| BBH | 18d00060 | um04198   | 1.00E-127 | um04198   | 18d00060 | 1.00E-122 |

|     |          |           |           |           |          |           |
|-----|----------|-----------|-----------|-----------|----------|-----------|
| BBH | 18c00090 | um15062   | 2.00E-75  | um15062   | 18c00090 | 6.00E-72  |
| NNN | 18d00113 | um11540   | 9.00E-69  | um11540   | 27d00074 | 0         |
| BBH | 18d00030 | um04250   | 0         | um04250   | 18d00030 | 0         |
| BBH | 18d00036 | um10412   | 0         | um10412   | 18d00036 | 0         |
| BBH | 18d00102 | um04126   | 0         | um04126   | 18d00102 | 1.00E-165 |
| NNN | 18c00062 | um04192   | 0         |           |          |           |
| BBH | 18d00083 | um04165   | 5.00E-38  | um04165   | 18d00083 | 5.00E-38  |
| BBH | 18d00028 | um10417   | 0         | um10417   | 18d00028 | 0         |
| BBH | 18c00043 | um10403   | 7.00E-13  | um10403   | 18c00043 | 2.00E-12  |
| BBH | 18d00079 | um04173   | 0         | um04173   | 18d00079 | 0         |
| BBH | 18d00021 | um10421   | 1.00E-126 | um10421   | 18d00021 | 1.00E-117 |
| BBH | 18d00094 | um10886.2 | 3.00E-91  | um10886.2 | 18d00094 | 2.00E-92  |
| BBH | 18d00008 | um04292   | 3.00E-66  | um04292   | 18d00008 | 3.00E-66  |
| BBH | 18c00019 | um04271   | 2.00E-63  | um04271   | 18c00019 | 5.00E-63  |
| BBH | 18c00055 | um04203   | 5.00E-77  | um04203   | 18c00055 | 8.00E-81  |
| BBH | 18c00086 | um04139   | 0         | um04139   | 18c00086 | 0         |
| NNN | 18d00016 | um04277   | 1.00E-74  |           |          |           |
| BBH | 18c00061 | um11125   | 1.00E-105 | um11125   | 18c00061 | 1.00E-106 |
| BBH | 18c00028 | um04249   | 0         | um04249   | 18c00028 | 0         |
| BBH | 18c00050 | um04214   | 1.00E-129 | um04214   | 18c00050 | 1.00E-134 |
| BBH | 18c00096 | um04114   | 0         | um04114   | 18c00096 | 0         |
| BBH | 18c00037 | um10408.2 | 6.00E-94  | um10408.2 | 18c00037 | 2.00E-88  |
| BBH | 18d00054 | um04208   | 0         | um04208   | 18d00054 | 0         |
| BBH | 18c00003 | um04297   | 1.00E-140 | um04297   | 18c00003 | 1.00E-132 |
| BBH | 18d00031 | um04248   | 2.00E-18  | um04248   | 18d00031 | 1.00E-14  |
| NNN | 18d00101 | um02607   | 1.00E-67  | um02607   | 5d00105  | 0         |
| BBH | 18d00037 | um04238   | 1.00E-148 | um04238   | 18d00037 | 1.00E-142 |
| BBH | 18d00038 | um04236   | 0         | um04236   | 18d00038 | 0         |
| BBH | 18c00079 | um04159   | 1.00E-123 | um04159   | 18c00079 | 1.00E-123 |
| BBH | 18c00069 | um04180   | 7.00E-88  | um04180   | 18c00069 | 2.00E-93  |
| BBH | 18d00061 | um04193.2 | 0         | um04193.2 | 18d00061 | 0         |
| BBH | 18c00081 | um04151   | 0         | um04151   | 18c00081 | 0         |
| BBH | 18d00052 | um04211   | 1.00E-76  | um04211   | 18d00052 | 2.00E-80  |
| BBH | 18c00083 | um10888   | 1.00E-81  | um10888   | 18c00083 | 3.00E-90  |
| NNN | 18c00072 | um04171   | 2.00E-87  |           |          |           |
| BBH | 18d00048 | um04217   | 4.00E-39  | um04217   | 18d00048 | 3.00E-44  |
| NNN | 18d00009 | um10433   | 1.00E-18  | um10433   | 18d00010 | 1.00E-24  |
| NNN | 18d00071 | um04181   | 0         |           |          |           |
| BBH | 18d00040 | um04232   | 0         | um04232   | 18d00040 | 0         |
| BBH | 18c00018 | um10426   | 1.00E-180 | um10426   | 18c00018 | 1.00E-178 |
| NNN | 18c00010 | um02490   | 2.00E-86  | um02490   | 12c00135 | 0         |
| BBH | 18c00040 | um04227   | 1.00E-130 | um04227   | 18c00040 | 1.00E-134 |
| BBH | 18d00104 | um04118   | 1.00E-172 | um04118   | 18d00104 | 1.00E-163 |
| BBH | 18c00057 | um04201   | 0         | um04201   | 18c00057 | 0         |
| BBH | 18c00048 | um04219.2 | 1.00E-164 | um04219.2 | 18c00048 | 1.00E-156 |
| BBH | 18d00086 | um04154   | 1.00E-54  | um04154   | 18d00086 | 9.00E-55  |
| BBH | 18d00001 | um10436   | 1.00E-174 | um10436   | 18d00001 | 1.00E-174 |
| BBH | 18c00009 | um04282   | 0         | um04282   | 18c00009 | 0         |
| BBH | 18d00034 | um10413   | 1.00E-19  | um10413   | 18d00034 | 7.00E-26  |
| BBH | 18c00032 | um04239   | 6.00E-42  | um04239   | 18c00032 | 3.00E-45  |
| NNN | 18d00062 | um11271   | 1.00E-56  | um11271   | 7d00250  | 0         |
| BBH | 18d00017 | um04275   | 0         | um04275   | 18d00017 | 0         |
| BBH | 18d00026 | um04253   | 0         | um04253   | 18d00026 | 0         |
| BBH | 18d00097 | um04136   | 0         | um04136   | 18d00097 | 0         |
| BBH | 18d00055 | um11131   | 1.00E-18  | um11131   | 18d00055 | 3.00E-16  |
| NNN | 18c00095 | um04115   | 0         |           |          |           |
| BBH | 18c00074 | um04166   | 3.00E-64  | um04166   | 18c00074 | 3.00E-68  |
| BBH | 18c00020 | um04269   | 3.00E-56  | um04269   | 18c00020 | 2.00E-62  |
| NNN | 18d00049 | um04216   | 5.00E-48  | um04216   | 18d00050 | 0         |
| BBH | 18d00078 | um10892   | 1.00E-134 | um10892   | 18d00078 | 1.00E-125 |
| BBH | 18c00051 | um04212   | 0         | um04212   | 18c00051 | 0         |
| BBH | 18d00070 | um15011.2 | 0         | um15011.2 | 18d00070 | 0         |

|     |          |           |           |           |          |           |
|-----|----------|-----------|-----------|-----------|----------|-----------|
| BBH | 18c00063 | um04189   | 0         | um04189   | 18c00063 | 0         |
| BBH | 18c00017 | um10428   | 1.00E-157 | um10428   | 18c00017 | 1.00E-158 |
| BBH | 18c00071 | um04169   | 0         | um04169   | 18c00071 | 0         |
| BBH | 18c00084 | um04150   | 0         | um04150   | 18c00084 | 0         |
| BBH | 18d00053 | um04210   | 0         | um04210   | 18d00053 | 0         |
| BBH | 18c00045 | um04223   | 1.00E-105 | um04223   | 18c00045 | 1.00E-116 |
| BBH | 18c00058 | um11126   | 0         | um11126   | 18c00058 | 0         |
| BBH | 18d00043 | um10407   | 1.00E-86  | um10407   | 18d00043 | 5.00E-78  |
| BBH | 18c00073 | um04172.2 | 6.00E-83  | um04172.2 | 18c00073 | 5.00E-88  |
| BBH | 18c00094 | um04117   | 1.00E-179 | um04117   | 18c00094 | 0         |
| BBH | 18d00096 | um10884   | 1.00E-143 | um10884   | 18d00096 | 1.00E-149 |
| BBH | 18d00035 | um04242   | 0         | um04242   | 18d00035 | 0         |
| BBH | 18d00063 | um04190   | 1.00E-118 | um04190   | 18d00063 | 1.00E-115 |
| BBH | 18c00001 | um04301   | 0         | um04301   | 18c00001 | 0         |
| BBH | 18c00031 | um04241   | 8.00E-24  | um04241   | 18c00031 | 4.00E-29  |
| BBH | 18c00039 | um04228   | 1.00E-129 | um04228   | 18c00039 | 1.00E-144 |
| BBH | 18d00103 | um04125   | 1.00E-107 | um04125   | 18d00103 | 1.00E-100 |
| BBH | 18c00026 | um04254   | 0         | um04254   | 18c00026 | 0         |
| BBH | 18c00052 | um04209   | 0         | um04209   | 18c00052 | 0         |
| BBH | 18d00033 | um04244   | 2.00E-46  | um04244   | 18d00033 | 2.00E-46  |
| BBH | 18d00068 | um04184   | 1.00E-112 | um04184   | 18d00068 | 3.00E-75  |
| BBH | 18d00012 | um10432.2 | 0         | um10432.2 | 18d00012 | 0         |
| BBH | 18d00019 | um04268   | 1.00E-175 | um04268   | 18d00019 | 0         |
| NNN | 18d00046 | um11133   | 3.00E-39  |           |          |           |
| NNN | 18d00106 | um04092   | 5.00E-82  | um04092   | 18d00109 | 7.00E-83  |
| BBH | 18d00050 | um04216   | 0         | um04216   | 18d00050 | 0         |
| BBH | 18c00060 | um04196   | 1.00E-84  | um04196   | 18c00060 | 9.00E-84  |
| BBH | 18d00007 | um04294   | 1.00E-111 | um04294   | 18d00007 | 1.00E-99  |
| BBH | 18d00091 | um04149   | 1.00E-36  | um04149   | 18d00091 | 2.00E-41  |
| BBH | 18c00034 | um12255   | 0         | um12255   | 18c00034 | 0         |
| BBH | 18d00075 | um04177.2 | 0         | um04177.2 | 18d00075 | 0         |
| BBH | 18c00007 | um04290   | 0         | um04290   | 18c00007 | 0         |
| BBH | 18c00093 | um04127   | 0         | um04127   | 18c00093 | 0         |
| NNN | 18c00042 | um04224   | 0         |           |          |           |
| BBH | 18c00097 | um11115   | 0         | um11115   | 18c00097 | 0         |
| BBH | 18c00076 | um04162   | 0         | um04162   | 18c00076 | 1.00E-153 |
| BBH | 18c00089 | um04133   | 6.00E-86  | um04133   | 18c00089 | 7.00E-93  |
| BBH | 18d00099 | um04132   | 0         | um04132   | 18d00099 | 0         |
| BBH | 18d00004 | um10434   | 0         | um10434   | 18d00004 | 0         |
| BBH | 18d00088 | um04161   | 0         | um04161   | 18d00088 | 0         |
| NNN | 18d00073 | um04179   | 7.00E-33  | um04179   | 18d00072 | 6.00E-34  |
| BBH | 18d00081 | um04175   | 0         | um04175   | 18d00081 | 0         |
| BBH | 18c00015 | um10431   | 1.00E-156 | um10431   | 18c00015 | 1.00E-150 |
| BBH | 18d00015 | um04278.2 | 0         | um04278.2 | 18d00015 | 0         |
| BBH | 18d00051 | um04213   | 0         | um04213   | 18d00051 | 0         |
| BBH | 18c00008 | um04288   | 1.00E-124 | um04288   | 18c00008 | 1.00E-124 |
| BBH | 18d00013 | um10429   | 0         | um10429   | 18d00013 | 0         |
| NNN | 18c00065 | um04503   | 4.00E-39  |           |          |           |
| NNN | 18d00041 | um11301   | 4.00E-59  | um11301   | 7d00180  | 0         |
| BBH | 18d00090 | um04152   | 0         | um04152   | 18d00090 | 0         |
| BBH | 18c00092 | um04128   | 1.00E-177 | um04128   | 18c00092 | 0         |
| BBH | 18c00023 | um04262   | 1.00E-143 | um04262   | 18c00023 | 1.00E-144 |
| BBH | 18d00098 | um04134   | 0         | um04134   | 18d00098 | 0         |
| BBH | 18c00033 | um04237   | 2.00E-48  | um04237   | 18c00033 | 2.00E-48  |
| BBH | 18c00075 | um04164   | 0         | um04164   | 18c00075 | 0         |
| BBH | 18d00005 | um04291   | 0         | um04291   | 18d00005 | 0         |
| BBH | 18c00016 | um10430   | 2.00E-46  | um10430   | 18c00016 | 5.00E-60  |
| BBH | 18c00047 | um04220   | 5.00E-89  | um04220   | 18c00047 | 3.00E-88  |
| BBH | 18d00087 | um04158   | 0         | um04158   | 18d00087 | 0         |
| BBH | 18d00080 | um04174   | 1.00E-109 | um04174   | 18d00080 | 0         |
| NNN | 18c00104 | um03416   | 8.00E-39  | um03416   | 8c00113  | 1.00E-134 |
| BBH | 18d00105 | um04116.2 | 1.00E-116 | um04116.2 | 18d00105 | 1.00E-123 |

|     |          |           |           |           |          |           |
|-----|----------|-----------|-----------|-----------|----------|-----------|
| BBH | 18c00066 | um11120   | 4.00E-36  | um11120   | 18c00066 | 4.00E-36  |
| BBH | 18c00059 | um04197   | 0         | um04197   | 18c00059 | 0         |
| BBH | 18c00041 | um04226   | 0         | um04226   | 18c00041 | 0         |
| BBH | 18d00072 | um04179   | 2.00E-34  | um04179   | 18d00072 | 6.00E-34  |
| NNN | 18c00105 | um04304   | 1.00E-124 | um04304   | 24d00061 | 0         |
| NNN | 18c00091 | um04130   | 1.00E-92  | um04130   | 22d00015 | 1.00E-116 |
| BBH | 18d00093 | um04146   | 0         | um04146   | 18d00093 | 0         |
| BBH | 18d00022 | um10419   | 0         | um10419   | 18d00022 | 0         |
| BBH | 18c00088 | um10882   | 3.00E-80  | um10882   | 18c00088 | 1.00E-80  |
| BBH | 18c00056 | um04202   | 0         | um04202   | 18c00056 | 0         |
| BBH | 18d00077 | um04168   | 4.00E-97  | um04168   | 18d00077 | 1.00E-108 |
| BBH | 18c00024 | um04260   | 0         | um04260   | 18c00024 | 0         |
| BBH | 18d00067 | um04185   | 3.00E-37  | um04185   | 18d00067 | 6.00E-34  |
| BBH | 18c00029 | um04247   | 0         | um04247   | 18c00029 | 0         |
| BBH | 18d00010 | um10433   | 2.00E-24  | um10433   | 18d00010 | 1.00E-24  |
| BBH | 18d00056 | um04206   | 0         | um04206   | 18d00056 | 0         |
| BBH | 18d00002 | um04300   | 4.00E-46  | um04300   | 18d00002 | 3.00E-49  |
| BBH | 18d00059 | um11127   | 0         | um11127   | 18d00059 | 0         |
| BBH | 18c00004 | um10435   | 1.00E-169 | um10435   | 18c00004 | 1.00E-175 |
| BBH | 18d00045 | um10405.2 | 1.00E-100 | um10405.2 | 18d00045 | 1.00E-98  |
| BBH | 18c00013 | um04283   | 1.00E-121 | um04283   | 18c00013 | 1.00E-136 |
| BBH | 18c00087 | um04138   | 1.00E-164 | um04138   | 18c00087 | 1.00E-164 |
| BBH | 18c00036 | um10410   | 0         | um10410   | 18c00036 | 0         |
| BBH | 18d00029 | um10415   | 0         | um10415   | 18d00029 | 0         |
| NNN | 18d00047 | um04218   | 0         |           |          | 0         |
| BBH | 18c00080 | um04163   | 7.00E-18  | um04163   | 18c00080 | 5.00E-17  |
| BBH | 18c00078 | um04156   | 0         | um04156   | 18c00078 | 0         |
| BBH | 18d00039 | um04234   | 1.00E-154 | um04234   | 18d00039 | 1.00E-151 |
| NNN | 18d00076 | um04176   | 0         |           |          | 0         |
| BBH | 18c00006 | um04293   | 0         | um04293   | 18c00006 | 0         |
| NNN | 18c00011 | um06374   | 3.00E-31  | um06374   | 1c00003  | 1.00E-174 |
| BBH | 18c00053 | um11130   | 3.00E-64  | um11130   | 18c00053 | 3.00E-64  |
| BBH | 18d00023 | um04259   | 1.00E-132 | um04259   | 18d00023 | 1.00E-136 |
| BBH | 18d00032 | um12256   | 1.00E-127 | um12256   | 18d00032 | 1.00E-128 |
| BBH | 18c00021 | um10424.2 | 0         | um10424.2 | 18c00021 | 0         |
| BBH | 18d00064 | um04188   | 0         | um04188   | 18d00064 | 0         |
| BBH | 18d00024 | um04258   | 0         | um04258   | 18d00024 | 0         |
| BBH | 18d00092 | um04148   | 1.00E-114 | um04148   | 18d00092 | 1.00E-118 |
| BBH | 18d00011 | um04285   | 0         | um04285   | 18d00011 | 0         |
| NNN | 18c00102 | um04503   | 4.00E-42  |           |          | 0         |
| BBH | 18d00044 | um10406   | 0         | um10406   | 18d00044 | 0         |
| BBH | 18c00067 | um04182   | 0         | um04182   | 18c00067 | 0         |
| BBH | 18d00003 | um04298   | 0         | um04298   | 18d00003 | 0         |
| BBH | 18c00049 | um11132   | 1.00E-119 | um11132   | 18c00049 | 1.00E-130 |
| NNN | 18c00044 | um10403   | 3.00E-11  | um10403   | 18c00043 | 2.00E-12  |
| BBH | 18d00018 | um04270   | 0         | um04270   | 18d00018 | 0         |
| BBH | 18c00098 | um11114   | 0         | um11114   | 18c00098 | 0         |
| BBH | 18c00014 | um04284   | 1.00E-123 | um04284   | 18c00014 | 1.00E-117 |
| BBH | 18d00082 | um04167   | 2.00E-96  | um04167   | 18d00082 | 1.00E-98  |
| BBH | 19c00092 | um10321   | 0         | um10321   | 19c00092 | 0         |
| BBH | 19c00124 | um02869   | 0         | um02869   | 19c00124 | 0         |
| BBH | 19c00108 | um02902   | 0         | um02902   | 19c00108 | 0         |
| BBH | 19d00044 | um10369   | 1.00E-139 | um10369   | 19d00044 | 1.00E-139 |
| BBH | 19c00128 | um02864   | 0         | um02864   | 19c00128 | 0         |
| BBH | 19d00096 | um10331   | 3.00E-81  | um10331   | 19d00096 | 6.00E-82  |
| BBH | 19c00043 | um10370   | 1.00E-176 | um10370   | 19c00043 | 1.00E-177 |
| BBH | 19d00108 | um02923   | 1.00E-124 | um02923   | 19d00108 | 1.00E-124 |
| BBH | 19d00028 | um03066   | 3.00E-70  | um03066   | 19d00028 | 2.00E-86  |
| BBH | 19c00141 | um11475   | 1.00E-16  | um11475   | 19c00141 | 4.00E-16  |
| BBH | 19d00114 | um02913   | 1.00E-97  | um02913   | 19d00114 | 5.00E-98  |
| BBH | 19c00038 | um03049   | 0         | um03049   | 19c00038 | 0         |
| BBH | 19c00018 | um03085   | 3.00E-93  | um03085   | 19c00018 | 2.00E-94  |

|     |          |           |           |           |          |           |
|-----|----------|-----------|-----------|-----------|----------|-----------|
| BBH | 19c00013 | um03097   | 2.00E-49  | um03097   | 19c00013 | 1.00E-48  |
| BBH | 19c00074 | um10339   | 0         | um10339   | 19c00074 | 0         |
| BBH | 19d00070 | um12204   | 1.00E-113 | um12204   | 19d00070 | 1.00E-118 |
| BBH | 19c00054 | um03015   | 7.00E-77  | um03015   | 19c00054 | 6.00E-82  |
| BBH | 19d00061 | um03019.2 | 2.00E-87  | um03019.2 | 19d00061 | 1.00E-85  |
| BBH | 19c00048 | um03007   | 0         | um03007   | 19c00048 | 0         |
| BBH | 19d00065 | um03002   | 1.00E-118 | um03002   | 19d00065 | 1.00E-106 |
| BBH | 19d00055 | um11939   | 1.00E-51  | um11939   | 19d00055 | 2.00E-45  |
| BBH | 19c00083 | um02951   | 0         | um02951   | 19c00083 | 0         |
| BBH | 19c00023 | um12207   | 4.00E-47  | um12207   | 19c00023 | 4.00E-49  |
| BBH | 19d00097 | um02944   | 0         | um02944   | 19d00097 | 0         |
| BBH | 19d00015 | um11944   | 0         | um11944   | 19d00015 | 1.00E-174 |
| BBH | 19c00042 | um03058   | 0         | um03058   | 19c00042 | 0         |
| BBH | 19d00118 | um02905   | 0         | um02905   | 19d00118 | 0         |
| BBH | 19c00098 | um02924   | 3.00E-71  | um02924   | 19c00098 | 2.00E-69  |
| BBH | 19d00152 | um02847   | 1.00E-175 | um02847   | 19d00152 | 1.00E-171 |
| BBH | 19d00051 | um10362   | 1.00E-51  | um10362   | 19d00051 | 1.00E-51  |
| BBH | 19d00083 | um02968   | 5.00E-51  | um02968   | 19d00083 | 4.00E-51  |
| BBH | 19c00125 | um02867   | 1.00E-58  | um02867   | 19c00125 | 2.00E-61  |
| BBH | 19c00084 | um02948   | 2.00E-50  | um02948   | 19c00084 | 2.00E-46  |
| BBH | 19c00113 | um02884   | 3.00E-73  | um02884   | 19c00113 | 5.00E-75  |
| BBH | 19c00091 | um02935.2 | 3.00E-47  | um02935.2 | 19c00091 | 3.00E-43  |
| BBH | 19c00020 | um10375   | 2.00E-49  | um10375   | 19c00020 | 1.00E-49  |
| BBH | 19c00055 | um10361   | 1.00E-33  | um10361   | 19c00055 | 3.00E-34  |
| NNN | 19c00040 | um02791   | 1.00E-104 | um02791   | 5d00005  | 0         |
| BBH | 19d00020 | um03082   | 0         | um03082   | 19d00020 | 0         |
| BBH | 19d00029 | um03065   | 1.00E-41  | um03065   | 19d00029 | 2.00E-44  |
| NNN | 19c00049 | um00210   | 1.00E-141 |           |          |           |
| BBH | 19d00126 | um11497   | 0         | um11497   | 19d00126 | 0         |
| NNN | 19c00132 | um02135   | 4.00E-29  | um02135   | 6d00088  | 1.00E-30  |
| BBH | 19d00129 | um11638   | 1.00E-91  | um11638   | 19d00129 | 1.00E-91  |
| NNN | 19d00062 | um03018   | 1.00E-106 |           |          |           |
| BBH | 19c00129 | um02862   | 1.00E-180 | um02862   | 19c00129 | 0         |
| BBH | 19d00012 | um03096   | 0         | um03096   | 19d00012 | 0         |
| BBH | 19d00056 | um03011   | 0         | um03011   | 19d00056 | 0         |
| BBH | 19c00115 | um02889   | 1.00E-101 | um02889   | 19c00115 | 1.00E-97  |
| BBH | 19c00010 | um11948   | 4.00E-26  | um11948   | 19c00010 | 5.00E-27  |
| BBH | 19d00109 | um02921   | 1.00E-113 | um02921   | 19d00109 | 1.00E-114 |
| BBH | 19d00066 | um03000   | 1.00E-104 | um03000   | 19d00066 | 1.00E-97  |
| BBH | 19d00106 | um10317.2 | 6.00E-45  | um10317.2 | 19d00106 | 7.00E-52  |
| BBH | 19d00117 | um11501   | 0         | um11501   | 19d00117 | 0         |
| BBH | 19c00064 | um02993   | 0         | um02993   | 19c00064 | 0         |
| BBH | 19d00014 | um11945   | 0         | um11945   | 19d00014 | 0         |
| BBH | 19c00099 | um02922   | 0         | um02922   | 19c00099 | 0         |
| NNN | 19d00153 | um02845.2 | 0         |           |          |           |
| NNN | 19d00052 | um03025   | 6.00E-82  | um03025   | 19d00053 | 0         |
| BBH | 19d00162 | um11476   | 0         | um11476   | 19d00162 | 0         |
| BBH | 19c00077 | um12201   | 1.00E-172 | um12201   | 19c00077 | 0         |
| BBH | 19d00141 | um02863   | 1.00E-112 | um02863   | 19d00141 | 1.00E-125 |
| BBH | 19c00082 | um10332   | 0         | um10332   | 19c00082 | 0         |
| BBH | 19c00112 | um11498   | 1.00E-177 | um11498   | 19c00112 | 1.00E-177 |
| BBH | 19c00032 | um03064   | 1.00E-127 | um03064   | 19c00032 | 1.00E-137 |
| BBH | 19c00085 | um10330   | 0         | um10330   | 19c00085 | 0         |
| BBH | 19c00126 | um11486   | 3.00E-63  | um11486   | 19c00126 | 4.00E-73  |
| NNN | 19d00037 | um03049   | 9.00E-11  | um03049   | 19c00038 | 0         |
| BBH | 19d00067 | um02998   | 0         | um02998   | 19d00067 | 0         |
| BBH | 19d00145 | um02855   | 0         | um02855   | 19d00145 | 0         |
| BBH | 19c00014 | um03095   | 1.00E-102 | um03095   | 19c00014 | 1.00E-112 |
| BBH | 19d00079 | um02976.2 | 0         | um02976.2 | 19d00079 | 0         |
| BBH | 19c00103 | um02910   | 1.00E-117 | um02910   | 19c00103 | 1.00E-120 |
| BBH | 19d00021 | um03081   | 0         | um03081   | 19d00021 | 1.00E-176 |
| BBH | 19d00010 | um03102   | 0         | um03102   | 19d00010 | 0         |

|     |          |           |           |           |          |           |
|-----|----------|-----------|-----------|-----------|----------|-----------|
| BBH | 19c00066 | um02990   | 1.00E-131 | um02990   | 19c00066 | 1.00E-129 |
| BBH | 19d00007 | um10630   | 0         | um10630   | 19d00007 | 0         |
| BBH | 19d00042 | um10371   | 1.00E-176 | um10371   | 19d00042 | 1.00E-173 |
| BBH | 19d00049 | um03029   | 1.00E-107 | um03029   | 19d00049 | 1.00E-108 |
| BBH | 19d00136 | um02876   | 4.00E-35  | um02876   | 19d00136 | 1.00E-32  |
| BBH | 19d00082 | um10338   | 1.00E-113 | um10338   | 19d00082 | 1.00E-120 |
| BBH | 19d00018 | um03088   | 2.00E-87  | um03088   | 19d00018 | 3.00E-89  |
| NNN | 19c00135 | um11482   | 5.00E-29  | um11482   | 7d00279  | 3.00E-19  |
| BBH | 19d00098 | um10327   | 4.00E-85  | um10327   | 19d00098 | 4.00E-90  |
| BBH | 19d00011 | um03099   | 2.00E-64  | um03099   | 19d00011 | 1.00E-47  |
| BBH | 19d00101 | um02936   | 0         | um02936   | 19d00101 | 0         |
| BBH | 19c00144 | um02827   | 0         | um02827   | 19c00144 | 0         |
| BBH | 19c00147 | um02823   | 0         | um02823   | 19c00147 | 0         |
| BBH | 19c00123 | um11488   | 2.00E-43  | um11488   | 19c00123 | 3.00E-43  |
| BBH | 19d00001 | um05070   | 1.00E-139 | um05070   | 19d00001 | 1.00E-139 |
| BBH | 19c00006 | um03108   | 0         | um03108   | 19c00006 | 0         |
| BBH | 19c00045 | um03034   | 0         | um03034   | 19c00045 | 0         |
| BBH | 19c00111 | um11496   | 1.00E-93  | um11496   | 19c00111 | 3.00E-93  |
| BBH | 19c00081 | um10333   | 1.00E-70  | um10333   | 19c00081 | 1.00E-77  |
| BBH | 19c00086 | um02945   | 0         | um02945   | 19c00086 | 0         |
| BBH | 19d00004 | um03115   | 0         | um03115   | 19d00004 | 0         |
| BBH | 19d00156 | um11481   | 1.00E-141 | um11481   | 19d00156 | 1.00E-134 |
| BBH | 19d00099 | um02938   | 0         | um02938   | 19d00099 | 0         |
| BBH | 19d00036 | um10365   | 0         | um10365   | 19d00036 | 0         |
| BBH | 19d00121 | um02901   | 1.00E-15  | um02901   | 19d00121 | 4.00E-19  |
| BBH | 19c00025 | um10374   | 1.00E-36  | um10374   | 19c00025 | 1.00E-36  |
| BBH | 19c00053 | um11941   | 0         | um11941   | 19c00053 | 0         |
| BBH | 19d00068 | um10344   | 1.00E-109 | um10344   | 19d00068 | 1.00E-109 |
| BBH | 19c00033 | um03063   | 0         | um03063   | 19c00033 | 0         |
| NNN | 19d00057 | um03013   | 0         |           |          |           |
| BBH | 19d00134 | um02878.2 | 5.00E-78  | um02878.2 | 19d00134 | 1.00E-74  |
| NNN | 19d00154 | um02844   | 5.00E-91  |           |          |           |
| BBH | 19d00043 | um03057   | 1.00E-144 | um03057   | 19d00043 | 1.00E-137 |
| BBH | 19c00030 | um03070   | 0         | um03070   | 19c00030 | 0         |
| BBH | 19c00127 | um02865   | 1.00E-150 | um02865   | 19c00127 | 1.00E-163 |
| BBH | 19d00163 | um02830   | 0         | um02830   | 19d00163 | 0         |
| BBH | 19d00053 | um03025   | 0         | um03025   | 19d00053 | 0         |
| BBH | 19d00022 | um03078   | 0         | um03078   | 19d00022 | 0         |
| BBH | 19c00012 | um03098   | 1.00E-139 | um03098   | 19c00012 | 1.00E-137 |
| BBH | 19c00120 | um12197   | 2.00E-38  | um12197   | 19c00120 | 3.00E-38  |
| BBH | 19c00067 | um02989   | 0         | um02989   | 19c00067 | 0         |
| BBH | 19d00139 | um11487   | 8.00E-84  | um11487   | 19d00139 | 3.00E-86  |
| BBH | 19c00015 | um11943.2 | 5.00E-76  | um11943.2 | 19c00015 | 1.00E-86  |
| BBH | 19d00078 | um02979   | 9.00E-93  | um02979   | 19d00078 | 5.00E-84  |
| BBH | 19c00102 | um02912   | 0         | um02912   | 19c00102 | 0         |
| BBH | 19c00140 | um11478   | 4.00E-71  | um11478   | 19c00140 | 3.00E-72  |
| BBH | 19d00144 | um02857   | 0         | um02857   | 19d00144 | 0         |
| BBH | 19d00090 | um10334   | 1.00E-125 | um10334   | 19d00090 | 1.00E-125 |
| BBH | 19c00094 | um10320.2 | 0         | um10320.2 | 19c00094 | 0         |
| BBH | 19c00008 | um10629.2 | 1.00E-109 | um10629.2 | 19c00008 | 1.00E-109 |
| NNN | 19c00075 | um10337   | 4.00E-93  | um10337   | 7d00279  | 8.00E-19  |
| BBH | 19c00080 | um02957   | 1.00E-122 | um02957   | 19c00080 | 1.00E-116 |
| BBH | 19c00087 | um10329   | 0         | um10329   | 19c00087 | 0         |
| BBH | 19d00084 | um02966   | 7.00E-97  | um02966   | 19d00084 | 1.00E-103 |
| BBH | 19c00009 | um10627   | 1.00E-108 | um10627   | 19c00009 | 1.00E-113 |
| BBH | 19d00039 | um10367   | 0         | um10367   | 19d00039 | 0         |
| BBH | 19d00058 | um15002.2 | 0         | um15002.2 | 19d00058 | 0         |
| BBH | 19d00013 | um11946   | 0         | um11946   | 19d00013 | 0         |
| BBH | 19c00146 | um02825   | 0         | um02825   | 19c00146 | 0         |
| BBH | 19c00022 | um03079   | 0         | um03079   | 19c00022 | 0         |
| BBH | 19d00091 | um02954   | 0         | um02954   | 19d00091 | 0         |
| BBH | 19d00128 | um02900   | 0         | um02900   | 19d00128 | 0         |



|     |          |           |           |           |          |           |
|-----|----------|-----------|-----------|-----------|----------|-----------|
| NNN | 19d00138 | um01054   | 5.00E-72  | um01054   | 7d00254  | 0         |
| BBH | 19d00155 | um02843   | 0         | um02843   | 19d00155 | 0         |
| BBH | 19c00035 | um03036   | 1.00E-112 | um03036   | 19c00035 | 1.00E-124 |
| BBH | 19c00110 | um11494   | 9.00E-93  | um11494   | 19c00110 | 4.00E-96  |
| BBH | 19d00054 | um03023   | 1.00E-112 | um03023   | 19d00054 | 1.00E-109 |
| BBH | 19d00157 | um02840   | 1.00E-141 | um02840   | 19d00157 | 1.00E-143 |
| BBH | 19d00005 | um10633   | 1.00E-80  | um10633   | 19d00005 | 3.00E-90  |
| BBH | 19d00069 | um10343   | 0         | um10343   | 19d00069 | 0         |
| BBH | 19d00160 | um11477   | 0         | um11477   | 19d00160 | 0         |
| BBH | 19d00125 | um02896   | 0         | um02896   | 19d00125 | 0         |
| BBH | 19d00059 | um03016   | 0         | um03016   | 19d00059 | 0         |
| BBH | 19d00031 | um10364   | 0         | um10364   | 19d00031 | 0         |
| BBH | 19c00068 | um02985   | 1.00E-146 | um02985   | 19c00068 | 1.00E-141 |
| BBH | 19d00086 | um10335   | 9.00E-41  | um10335   | 19d00086 | 1.00E-51  |
| BBH | 19c00031 | um03067   | 1.00E-99  | um03067   | 19c00031 | 2.00E-97  |
| BBH | 19c00137 | um11480   | 0         | um11480   | 19c00137 | 0         |
| BBH | 19c00026 | um03073   | 2.00E-79  | um03073   | 19c00026 | 3.00E-74  |
| NNN | 19c00150 | um03407   | 3.00E-27  | um03407   | 8d00115  | 0         |
| BBH | 19c00121 | um11490   | 0         | um11490   | 19c00121 | 0         |
| BBH | 19c00073 | um02972   | 1.00E-156 | um02972   | 19c00073 | 1.00E-134 |
| BBH | 19d00159 | um02835   | 0         | um02835   | 19d00159 | 0         |
| BBH | 19d00050 | um03028   | 0         | um03028   | 19d00050 | 0         |
| BBH | 19d00087 | um02961   | 0         | um02961   | 19d00087 | 0         |
| BBH | 19d00123 | um11495   | 7.00E-60  | um11495   | 19d00123 | 1.00E-63  |
| BBH | 19c00116 | um15086.2 | 0         | um15086.2 | 19c00116 | 0         |
| BBH | 19d00040 | um10368   | 0         | um10368   | 19d00040 | 0         |
| BBH | 19d00161 | um02833   | 1.00E-100 | um02833   | 19d00161 | 6.00E-95  |
| BBH | 19d00074 | um02984   | 0         | um02984   | 19d00074 | 0         |
| NNN | 19d00092 | um12200   | 7.00E-18  | um12200   | 19d00093 | 0         |
| BBH | 19c00034 | um03040   | 1.00E-109 | um03040   | 19c00034 | 1.00E-109 |
| NNN | 19d00104 | um10319   | 2.00E-93  |           |          |           |
| BBH | 19c00131 | um11485   | 2.00E-67  | um11485   | 19c00131 | 4.00E-77  |
| BBH | 19c00047 | um03027   | 0         | um03027   | 19c00047 | 0         |
| BBH | 19c00058 | um03006   | 1.00E-143 | um03006   | 19c00058 | 1.00E-139 |
| BBH | 19d00111 | um15000.2 | 0         | um15000.2 | 19d00111 | 0         |
| NNN | 19c00016 | um10378   | 0         |           |          |           |
| BBH | 19d00103 | um02933   | 4.00E-48  | um02933   | 19d00103 | 3.00E-50  |
| BBH | 19d00047 | um03032   | 3.00E-75  | um03032   | 19d00047 | 1.00E-74  |
| BBH | 19c00105 | um11500   | 1.00E-135 | um11500   | 19c00105 | 0         |
| BBH | 19c00004 | um00822   | 1.00E-178 | um00822   | 19c00004 | 1.00E-177 |
| BBH | 19d00024 | um03071   | 0         | um03071   | 19d00024 | 0         |
| BBH | 19c00003 | um03113   | 0         | um03113   | 19c00003 | 0         |
| BBH | 19c00136 | um02846.2 | 0         | um02846.2 | 19c00136 | 0         |
| BBH | 19c00143 | um02829   | 0         | um02829   | 19c00143 | 0         |
| BBH | 19c00079 | um02959   | 5.00E-44  | um02959   | 19c00079 | 5.00E-44  |
| BBH | 19c00051 | um03010   | 1.00E-118 | um03010   | 19c00051 | 1.00E-124 |
| BBH | 19c00118 | um02879   | 1.00E-124 | um02879   | 19c00118 | 1.00E-146 |
| BBH | 19c00060 | um03001   | 1.00E-108 | um03001   | 19c00060 | 1.00E-107 |
| BBH | 19c00070 | um02978   | 1.00E-131 | um02978   | 19c00070 | 1.00E-133 |
| BBH | 19d00019 | um10376   | 1.00E-168 | um10376   | 19d00019 | 1.00E-170 |
| BBH | 19d00006 | um10632   | 6.00E-99  | um10632   | 19d00006 | 3.00E-94  |
| BBH | 19c00027 | um10373   | 1.00E-103 | um10373   | 19c00027 | 3.00E-92  |
| BBH | 19d00030 | um03042   | 4.00E-26  | um03042   | 19d00030 | 3.00E-29  |
| BBH | 19c00134 | um11483   | 5.00E-95  | um11483   | 19c00134 | 5.00E-95  |
| BBH | 19d00132 | um02883   | 8.00E-29  | um02883   | 19d00132 | 3.00E-29  |
| NNN | 19c00072 | um10340   | 1.00E-128 |           |          |           |
| BBH | 19d00085 | um10336   | 0         | um10336   | 19d00085 | 0         |
| BBH | 19d00137 | um02874   | 0         | um02874   | 19d00137 | 0         |
| NNN | 19d00003 | um03116   | 0         |           |          |           |
| BBH | 19d00081 | um12202   | 2.00E-15  | um12202   | 19d00081 | 2.00E-17  |
| BBH | 19c00096 | um02929   | 0         | um02929   | 19c00096 | 0         |
| BBH | 19c00088 | um02942   | 1.00E-140 | um02942   | 19c00088 | 1.00E-150 |

|     |          |           |           |           |          |           |
|-----|----------|-----------|-----------|-----------|----------|-----------|
| BBH | 19c00044 | um03062   | 0         | um03062   | 19c00044 | 0         |
| NNN | 19d00135 | um02877   | 0         |           |          |           |
| BBH | 19d00080 | um02974   | 0         | um02974   | 19d00080 | 0         |
| BBH | 19d00041 | um03061   | 1.00E-121 | um03061   | 19d00041 | 1.00E-126 |
| BBH | 19d00105 | um10318   | 2.00E-80  | um10318   | 19d00105 | 6.00E-86  |
| BBH | 19c00078 | um02962   | 0         | um02962   | 19c00078 | 0         |
| BBH | 19c00002 | um03114   | 1.00E-153 | um03114   | 19c00002 | 1.00E-156 |
| BBH | 19c00069 | um02983   | 1.00E-32  | um02983   | 19c00069 | 2.00E-38  |
| BBH | 19d00023 | um03074   | 2.00E-47  | um03074   | 19d00023 | 2.00E-48  |
| BBH | 19d00077 | um02980   | 0         | um02980   | 19d00077 | 0         |
| BBH | 19d00120 | um02903   | 1.00E-112 | um02903   | 19d00120 | 1.00E-114 |
| BBH | 19c00007 | um03105   | 9.00E-22  | um03105   | 19c00007 | 5.00E-19  |
| BBH | 19c00059 | um11937   | 1.00E-76  | um11937   | 19c00059 | 2.00E-76  |
| BBH | 19d00100 | um02937   | 1.00E-133 | um02937   | 19d00100 | 1.00E-140 |
| BBH | 19c00024 | um03076   | 0         | um03076   | 19c00024 | 0         |
| BBH | 19d00048 | um12205   | 0         | um12205   | 19d00048 | 0         |
| BBH | 19c00061 | um02999   | 1.00E-116 | um02999   | 19c00061 | 1.00E-104 |
| BBH | 19d00093 | um12200   | 0         | um12200   | 19d00093 | 0         |
| BBH | 19d00073 | um02986   | 1.00E-92  | um02986   | 19d00073 | 9.00E-71  |
| BBH | 19d00110 | um02919   | 0         | um02919   | 19d00110 | 0         |
| BBH | 19d00113 | um02915   | 0         | um02915   | 19d00113 | 0         |
| BBH | 19c00017 | um10377   | 0         | um10377   | 19c00017 | 0         |
| BBH | 19d00143 | um02859   | 0         | um02859   | 19d00143 | 0         |
| BBH | 19c00148 | um11932   | 0         | um11932   | 19c00148 | 0         |
| BBH | 19c00133 | um02850   | 1.00E-154 | um02850   | 19c00133 | 1.00E-138 |
| BBH | 19c00119 | um11491   | 1.00E-60  | um11491   | 19c00119 | 9.00E-65  |
| BBH | 19d00017 | um03089   | 2.00E-42  | um03089   | 19d00017 | 6.00E-49  |
| BBH | 19c00071 | um12203   | 1.00E-161 | um12203   | 19c00071 | 1.00E-165 |
| NNN | 19d00131 | um02888   | 1.00E-178 | um02888   | 6c00022  | 4.00E-28  |
| BBH | 19d00094 | um02950   | 1.00E-164 | um02950   | 19d00094 | 1.00E-175 |
| BBH | 19c00114 | um02886   | 6.00E-86  | um02886   | 19c00114 | 1.00E-96  |
| BBH | 19d00035 | um03045.2 | 0         | um03045.2 | 19d00035 | 0         |
| BBH | 19d00033 | um03037   | 1.00E-116 | um03037   | 19d00033 | 1.00E-112 |
| BBH | 19d00046 | um03033   | 1.00E-115 | um03033   | 19d00046 | 1.00E-107 |
| BBH | 19c00089 | um10326.2 | 0         | um10326.2 | 19c00089 | 0         |
| BBH | 19c00101 | um11934   | 1.00E-31  | um11934   | 19c00101 | 8.00E-37  |
| BBH | 19c00021 | um03080   | 0         | um03080   | 19c00021 | 0         |
| BBH | 19c00041 | um10372   | 1.00E-144 | um10372   | 19c00041 | 1.00E-137 |
| BBH | 19d00150 | um02851   | 2.00E-19  | um02851   | 19d00150 | 4.00E-22  |
| BBH | 19d00116 | um15064   | 0         | um15064   | 19d00116 | 0         |
| BBH | 19d00089 | um02958   | 0         | um02958   | 19d00089 | 0         |
| BBH | 19c00019 | um03083   | 1.00E-125 | um03083   | 19c00019 | 1.00E-125 |
| NNN | 19d00112 | um02917   | 1.00E-152 |           |          |           |
| BBH | 19d00149 | um02852   | 9.00E-31  | um02852   | 19d00149 | 1.00E-30  |
| NNN | 19d00008 | um10628   | 1.00E-37  |           |          |           |
| BBH | 19d00076 | um02981   | 2.00E-43  | um02981   | 19d00076 | 2.00E-40  |
| BBH | 19c00056 | um03020   | 8.00E-81  | um03020   | 19c00056 | 2.00E-77  |
| BBH | 19c00138 | um12196   | 2.00E-90  | um12196   | 19c00138 | 1.00E-85  |
| BBH | 19c00076 | um02967   | 1.00E-102 | um02967   | 19c00076 | 1.00E-92  |
| BBH | 19d00045 | um03035   | 0         | um03035   | 19d00045 | 0         |
| BBH | 19d00026 | um03069   | 0         | um03069   | 19d00026 | 0         |
| BBH | 19d00063 | um03024   | 0         | um03024   | 19d00063 | 0         |
| BBH | 19c00107 | um02904   | 0         | um02904   | 19c00107 | 0         |
| BBH | 19c00062 | um15001   | 0         | um15001   | 19c00062 | 0         |
| BBH | 19d00072 | um10341   | 0         | um10341   | 19d00072 | 0         |
| BBH | 19d00127 | um02899   | 0         | um02899   | 19d00127 | 0         |
| BBH | 19d00140 | um02868   | 0         | um02868   | 19d00140 | 0         |
| BBH | 19c00001 | um03117.2 | 0         | um03117.2 | 19c00001 | 0         |
| NNN | 19c00036 | um03044   | 0         |           |          |           |
| BBH | 19d00158 | um02838.2 | 2.00E-96  | um02838.2 | 19d00158 | 2.00E-96  |
| BBH | 19d00151 | um02849   | 1.00E-113 | um02849   | 19d00151 | 1.00E-110 |
| BBH | 19d00122 | um02891   | 0         | um02891   | 19d00122 | 0         |

|     |          |           |           |           |          |           |
|-----|----------|-----------|-----------|-----------|----------|-----------|
| BBH | 19d00034 | um12206   | 6.00E-38  | um12206   | 19d00034 | 1.00E-31  |
| BBH | 19d00088 | um02960   | 0         | um02960   | 19d00088 | 0         |
| BBH | 19d00142 | um02861   | 2.00E-16  | um02861   | 19d00142 | 2.00E-17  |
| BBH | 19c00005 | um03110   | 1.00E-136 | um03110   | 19c00005 | 1.00E-127 |
| BBH | 19d00016 | um03092   | 1.00E-112 | um03092   | 19d00016 | 1.00E-109 |
| NNN | 19d00102 | um10322   | 0         |           |          |           |
| BBH | 19d00071 | um10342   | 1.00E-93  | um10342   | 19d00071 | 2.00E-84  |
| BBH | 19d00009 | um03103   | 5.00E-73  | um03103   | 19d00009 | 5.00E-73  |
| BBH | 19d00095 | um12199   | 2.00E-58  | um12199   | 19d00095 | 4.00E-71  |
| BBH | 19d00130 | um02887   | 0         | um02887   | 19d00130 | 0         |
| BBH | 19d00164 | um02828   | 0         | um02828   | 19d00164 | 0         |
| BBH | 19d00124 | um02895   | 0         | um02895   | 19d00124 | 0         |
| BBH | 19c00100 | um02920   | 1.00E-123 | um02920   | 19c00100 | 1.00E-123 |
| BBH | 19d00032 | um03038   | 0         | um03038   | 19d00032 | 0         |
| BBH | 19c00109 | um02890   | 1.00E-165 | um02890   | 19c00109 | 1.00E-165 |
| BBH | 19c00039 | um10366.2 | 6.00E-50  | um10366.2 | 19c00039 | 4.00E-54  |
| BBH | 19c00011 | um11947   | 9.00E-29  | um11947   | 19c00011 | 9.00E-29  |
| NNN | 19c00139 | um11479   | 1.00E-151 |           |          |           |
| BBH | 19c00063 | um02994   | 4.00E-91  | um02994   | 19c00063 | 2.00E-93  |
| BBH | 19d00107 | um02926   | 2.00E-54  | um02926   | 19d00107 | 3.00E-55  |
| BBH | 19d00060 | um10360   | 2.00E-39  | um10360   | 19d00060 | 2.00E-39  |
| BBH | 19c00130 | um02860   | 0         | um02860   | 19c00130 | 0         |
| BBH | 19d00027 | um03068   | 1.00E-146 | um03068   | 19d00027 | 1.00E-147 |
| BBH | 19d00064 | um03003   | 0         | um03003   | 19d00064 | 0         |
| BBH | 19d00002 | um10636   | 1.00E-159 | um10636   | 19d00002 | 1.00E-159 |
| NNN | 19c00117 | um02881   | 7.00E-47  |           |          |           |
| BBH | 19d00115 | um02911   | 0         | um02911   | 19d00115 | 0         |
| BBH | 19d00165 | um02824   | 1.00E-131 | um02824   | 19d00165 | 1.00E-128 |
| BBH | 19d00075 | um02982   | 0         | um02982   | 19d00075 | 0         |
| BBH | 19c00057 | um03017   | 1.00E-109 | um03017   | 19c00057 | 1.00E-124 |
| BBH | 19c00142 | um11474   | 1.00E-140 | um11474   | 19c00142 | 1.00E-150 |
| BBH | 19c00090 | um10323   | 4.00E-13  | um10323   | 19c00090 | 4.00E-16  |
| BBH | 19d00133 | um02880   | 2.00E-52  | um02880   | 19d00133 | 9.00E-71  |
| BBH | 19c00046 | um10363   | 2.00E-92  | um10363   | 19c00046 | 3.00E-87  |
| BBH | 19c00050 | um03009   | 1.00E-102 | um03009   | 19c00050 | 1.00E-109 |
| BBH | 20c00048 | um06050   | 0         | um06050   | 20c00048 | 0         |
| BBH | 20c00055 | um06040   | 1.00E-101 | um06040   | 20c00055 | 1.00E-94  |
| BBH | 20c00041 | um06066   | 0         | um06066   | 20c00041 | 0         |
| BBH | 20d00034 | um06071   | 0         | um06071   | 20d00034 | 0         |
| BBH | 20c00016 | um06131   | 1.00E-142 | um06131   | 20c00016 | 1.00E-137 |
| BBH | 20d00048 | um06047   | 1.00E-169 | um06047   | 20d00048 | 1.00E-164 |
| BBH | 20d00019 | um11206   | 1.00E-102 | um11206   | 20d00019 | 1.00E-100 |
| BBH | 20d00076 | um05989   | 0         | um05989   | 20d00076 | 0         |
| BBH | 20c00031 | um06085   | 2.00E-87  | um06085   | 20c00031 | 1.00E-89  |
| BBH | 20d00041 | um06059   | 0         | um06059   | 20d00041 | 0         |
| BBH | 20d00020 | um06103   | 0         | um06103   | 20d00020 | 0         |
| BBH | 20c00056 | um06037   | 7.00E-94  | um06037   | 20c00056 | 5.00E-88  |
| BBH | 20c00043 | um06062   | 0         | um06062   | 20c00043 | 0         |
| BBH | 20d00016 | um11208   | 8.00E-67  | um11208   | 20d00016 | 1.00E-74  |
| BBH | 20d00037 | um06065   | 0         | um06065   | 20d00037 | 0         |
| BBH | 20c00027 | um15102   | 0         | um15102   | 20c00027 | 0         |
| BBH | 20c00075 | um05994   | 0         | um05994   | 20c00075 | 0         |
| BBH | 20d00014 | um12322   | 7.00E-48  | um12322   | 20d00014 | 2.00E-49  |
| BBH | 20d00054 | um06032   | 2.00E-30  | um06032   | 20d00054 | 2.00E-29  |
| BBH | 20c00030 | um06087   | 0         | um06087   | 20c00030 | 0         |
| BBH | 20d00040 | um06060   | 5.00E-87  | um06060   | 20d00040 | 9.00E-85  |
| BBH | 20d00033 | um06072   | 1.00E-110 | um06072   | 20d00033 | 1.00E-113 |
| BBH | 20d00018 | um06105   | 0         | um06105   | 20d00018 | 0         |
| BBH | 20d00077 | um05982   | 1.00E-144 | um05982   | 20d00077 | 1.00E-133 |
| BBH | 20c00040 | um06068   | 1.00E-75  | um06068   | 20c00040 | 2.00E-79  |
| BBH | 20c00026 | um06102   | 1.00E-179 | um06102   | 20c00026 | 1.00E-176 |
| BBH | 20d00065 | um05998   | 4.00E-52  | um05998   | 20d00065 | 3.00E-53  |

|     |          |           |           |           |          |           |
|-----|----------|-----------|-----------|-----------|----------|-----------|
| BBH | 20c00065 | um06014   | 1.00E-29  | um06014   | 20c00065 | 2.00E-22  |
| BBH | 20c00015 | um06129   | 0         | um06129   | 20c00015 | 0         |
| BBH | 20d00043 | um06056   | 0         | um06056   | 20d00043 | 0         |
| NNN | 20c00003 | um10815   | 1.00E-84  | um10815   | 22d00064 | 0         |
| BBH | 20d00032 | um06075   | 0         | um06075   | 20d00032 | 0         |
| BBH | 20d00017 | um11207   | 1.00E-126 | um11207   | 20d00017 | 1.00E-123 |
| BBH | 20d00070 | um06009   | 0         | um06009   | 20d00070 | 0         |
| BBH | 20c00072 | um06010   | 0         | um06010   | 20c00072 | 0         |
| BBH | 20d00027 | um06088   | 0         | um06088   | 20d00027 | 0         |
| BBH | 20d00058 | um06020   | 2.00E-78  | um06020   | 20d00058 | 1.00E-88  |
| BBH | 20d00051 | um06038   | 0         | um06038   | 20d00051 | 0         |
| BBH | 20d00052 | um06036   | 1.00E-27  | um06036   | 20d00052 | 1.00E-25  |
| BBH | 20c00028 | um06093   | 1.00E-167 | um06093   | 20c00028 | 1.00E-160 |
| BBH | 20d00006 | um11215   | 0         | um11215   | 20d00006 | 0         |
| BBH | 20d00047 | um06049   | 1.00E-176 | um06049   | 20d00047 | 1.00E-174 |
| BBH | 20c00057 | um06035   | 0         | um06035   | 20c00057 | 0         |
| BBH | 20d00059 | um06019   | 0         | um06019   | 20d00059 | 0         |
| BBH | 20c00062 | um12033   | 1.00E-42  | um12033   | 20c00062 | 1.00E-54  |
| BBH | 20d00010 | um06125   | 1.00E-171 | um06125   | 20d00010 | 1.00E-170 |
| BBH | 20d00039 | um06063   | 0         | um06063   | 20d00039 | 0         |
| BBH | 20c00014 | um06128   | 4.00E-23  | um06128   | 20c00014 | 1.00E-23  |
| BBH | 20d00005 | um06143   | 2.00E-49  | um06143   | 20d00005 | 2.00E-44  |
| BBH | 20c00029 | um06090   | 6.00E-69  | um06090   | 20c00029 | 1.00E-66  |
| BBH | 20d00071 | um11591   | 0         | um11591   | 20d00071 | 0         |
| BBH | 20c00034 | um06078   | 1.00E-174 | um06078   | 20c00034 | 1.00E-178 |
| BBH | 20c00073 | um05997   | 1.00E-163 | um05997   | 20c00073 | 1.00E-160 |
| BBH | 20c00045 | um06058   | 1.00E-147 | um06058   | 20c00045 | 1.00E-156 |
| BBH | 20d00008 | um06133   | 0         | um06133   | 20d00008 | 0         |
| BBH | 20d00066 | um06003   | 5.00E-63  | um06003   | 20d00066 | 1.00E-62  |
| BBH | 20c00009 | um11214   | 0         | um11214   | 20c00009 | 0         |
| BBH | 20d00042 | um11600   | 0         | um11600   | 20d00042 | 0         |
| BBH | 20c00032 | um06082   | 1.00E-138 | um06082   | 20c00032 | 1.00E-134 |
| BBH | 20d00049 | um06045   | 0         | um06045   | 20d00049 | 0         |
| BBH | 20d00026 | um06089   | 9.00E-67  | um06089   | 20d00026 | 6.00E-82  |
| BBH | 20d00031 | um06079   | 0         | um06079   | 20d00031 | 0         |
| BBH | 20d00053 | um06034   | 0         | um06034   | 20d00053 | 0         |
| BBH | 20c00039 | um06069   | 1.00E-178 | um06069   | 20c00039 | 0         |
| BBH | 20c00051 | um06046   | 5.00E-46  | um06046   | 20c00051 | 1.00E-44  |
| BBH | 20d00067 | um11593   | 0         | um11593   | 20d00067 | 0         |
| BBH | 20c00060 | um12035   | 9.00E-63  | um12035   | 20c00060 | 8.00E-63  |
| BBH | 20c00063 | um06022   | 7.00E-86  | um06022   | 20c00063 | 8.00E-79  |
| BBH | 20c00033 | um06080   | 0         | um06080   | 20c00033 | 0         |
| BBH | 20c00070 | um06004   | 4.00E-73  | um06004   | 20c00070 | 2.00E-73  |
| BBH | 20c00044 | um06061   | 0         | um06061   | 20c00044 | 0         |
| BBH | 20c00052 | um11597   | 7.00E-45  | um11597   | 20c00052 | 5.00E-39  |
| NNN | 20c00080 | um01758   | 1.00E-171 | um01758   | 22c00172 | 0         |
| BBH | 20d00045 | um11598   | 1.00E-143 | um11598   | 20d00045 | 1.00E-143 |
| NNN | 20c00061 | um12034   | 1.00E-27  |           |          |           |
| BBH | 20c00068 | um06000   | 0         | um06000   | 20c00068 | 0         |
| BBH | 20d00069 | um11595.2 | 2.00E-39  | um11595.2 | 20d00069 | 2.00E-39  |
| BBH | 20c00023 | um06111   | 1.00E-144 | um06111   | 20c00023 | 1.00E-152 |
| BBH | 20c00006 | um06140.2 | 3.00E-94  | um06140.2 | 20c00006 | 4.00E-92  |
| BBH | 20c00013 | um06121   | 0         | um06121   | 20c00013 | 0         |
| BBH | 20d00082 | um05987   | 0         | um05987   | 20d00082 | 0         |
| BBH | 20d00073 | um11590   | 0         | um11590   | 20d00073 | 0         |
| BBH | 20d00085 | um10543   | 3.00E-87  | um10543   | 20d00085 | 2.00E-94  |
| NNN | 20c00071 | um12321   | 1.00E-117 |           |          |           |
| NNN | 20c00007 | um06139   | 0         |           |          |           |
| BBH | 20d00028 | um06086   | 0         | um06086   | 20d00028 | 0         |
| BBH | 20d00060 | um06018.2 | 1.00E-176 | um06018.2 | 20d00060 | 0         |
| BBH | 20d00012 | um11213   | 0         | um11213   | 20d00012 | 0         |
| BBH | 20d00030 | um11601   | 1.00E-122 | um11601   | 20d00030 | 1.00E-122 |

|     |          |           |           |           |          |           |
|-----|----------|-----------|-----------|-----------|----------|-----------|
| BBH | 20d00025 | um06092   | 0         | um06092   | 20d00025 | 0         |
| BBH | 20d00057 | um11808   | 0         | um11808   | 20d00057 | 0         |
| BBH | 20c00069 | um06002   | 1.00E-134 | um06002   | 20c00069 | 1.00E-139 |
| BBH | 20d00007 | um06135   | 5.00E-96  | um06135   | 20d00007 | 3.00E-86  |
| BBH | 20c00035 | um06073   | 1.00E-139 | um06073   | 20c00035 | 1.00E-131 |
| NNN | 20d00061 | um11805   | 1.00E-165 |           |          |           |
| BBH | 20c00053 | um06042   | 0         | um06042   | 20c00053 | 0         |
| BBH | 20c00047 | um06053   | 1.00E-126 | um06053   | 20c00047 | 1.00E-119 |
| NNN | 20c00022 | um06111   | 8.00E-65  | um06111   | 20c00023 | 1.00E-152 |
| BBH | 20d00011 | um06130   | 0         | um06130   | 20d00011 | 0         |
| BBH | 20c00012 | um06120   | 0         | um06120   | 20c00012 | 0         |
| BBH | 20d00050 | um06043   | 1.00E-135 | um06043   | 20d00050 | 1.00E-134 |
| BBH | 20d00036 | um06067   | 0         | um06067   | 20d00036 | 0         |
| BBH | 20d00046 | um06051   | 7.00E-44  | um06051   | 20d00046 | 4.00E-44  |
| BBH | 20d00029 | um06083   | 0         | um06083   | 20d00029 | 0         |
| BBH | 20c00008 | um06138   | 0         | um06138   | 20c00008 | 0         |
| BBH | 20d00079 | um05985   | 6.00E-25  | um05985   | 20d00079 | 1.00E-30  |
| BBH | 20d00083 | um05986   | 1.00E-121 | um05986   | 20d00083 | 1.00E-121 |
| BBH | 20c00011 | um06118   | 0         | um06118   | 20c00011 | 0         |
| BBH | 20d00009 | um06119   | 1.00E-116 | um06119   | 20d00009 | 1.00E-117 |
| BBH | 20c00001 | um02811   | 1.00E-105 | um02811   | 20c00001 | 1.00E-103 |
| BBH | 20d00024 | um11602   | 8.00E-53  | um11602   | 20d00024 | 2.00E-51  |
| BBH | 20c00066 | um06012   | 0         | um06012   | 20c00066 | 0         |
| BBH | 20c00025 | um06107   | 1.00E-102 | um06107   | 20c00025 | 1.00E-102 |
| BBH | 20d00022 | um06098   | 0         | um06098   | 20d00022 | 0         |
| BBH | 20d00055 | um06029   | 0         | um06029   | 20d00055 | 0         |
| BBH | 20d00062 | um06013   | 0         | um06013   | 20d00062 | 0         |
| BBH | 20c00004 | um15027   | 1.00E-138 | um15027   | 20c00004 | 1.00E-138 |
| BBH | 20d00074 | um05992   | 1.00E-103 | um05992   | 20d00074 | 1.00E-101 |
| BBH | 20c00076 | um05988   | 0         | um05988   | 20c00076 | 0         |
| BBH | 20c00078 | um05991   | 0         | um05991   | 20c00078 | 0         |
| BBH | 20c00046 | um06055   | 1.00E-143 | um06055   | 20c00046 | 1.00E-143 |
| BBH | 20d00080 | um11589   | 2.00E-38  | um11589   | 20d00080 | 2.00E-37  |
| BBH | 20d00035 | um06070   | 1.00E-174 | um06070   | 20d00035 | 1.00E-173 |
| BBH | 20c00059 | um06031   | 1.00E-152 | um06031   | 20c00059 | 1.00E-153 |
| BBH | 20d00023 | um06097   | 1.00E-114 | um06097   | 20d00023 | 1.00E-121 |
| BBH | 20c00010 | um06134   | 7.00E-68  | um06134   | 20c00010 | 9.00E-70  |
| BBH | 20d00021 | um11204   | 0         | um11204   | 20d00021 | 0         |
| BBH | 20c00005 | um06141   | 4.00E-72  | um06141   | 20c00005 | 2.00E-79  |
| BBH | 20d00044 | um11599   | 1.00E-129 | um11599   | 20d00044 | 1.00E-138 |
| NNN | 20c00079 | um10543   | 2.00E-56  | um10543   | 20d00085 | 2.00E-94  |
| BBH | 20c00067 | um05999   | 6.00E-39  | um05999   | 20c00067 | 4.00E-43  |
| BBH | 20c00064 | um11806.2 | 0         | um11806.2 | 20c00064 | 0         |
| BBH | 20c00049 | um06048   | 4.00E-99  | um06048   | 20c00049 | 4.00E-99  |
| BBH | 20c00054 | um11596   | 0         | um11596   | 20c00054 | 0         |
| BBH | 20c00037 | um06076   | 0         | um06076   | 20c00037 | 0         |
| BBH | 20c00018 | um11211   | 6.00E-57  | um11211   | 20c00018 | 7.00E-58  |
| BBH | 20c00077 | um05984   | 0         | um05984   | 20c00077 | 0         |
| BBH | 20c00017 | um06117   | 0         | um06117   | 20c00017 | 0         |
| BBH | 20d00068 | um11594   | 7.00E-58  | um11594   | 20d00068 | 2.00E-56  |
| BBH | 20c00058 | um06033   | 6.00E-80  | um06033   | 20c00058 | 6.00E-74  |
| BBH | 20d00056 | um06027.2 | 0         | um06027.2 | 20d00056 | 0         |
| NNN | 20d00081 | um11589   | 4.00E-42  | um11589   | 20d00080 | 2.00E-37  |
| NNN | 21d00001 | um04091   | 2.00E-96  | um04091   | 1c00052  | 0         |
| NNN | 21c00002 | um11407   | 7.00E-63  |           |          |           |
| BBH | 21c00006 | um05883   | 1.00E-66  | um05883   | 21c00006 | 1.00E-66  |
| BBH | 21d00004 | um11032   | 3.00E-27  | um11032   | 21d00004 | 5.00E-27  |
| BBH | 21c00005 | um11034   | 4.00E-74  | um11034   | 21c00005 | 5.00E-74  |
| BBH | 21c00004 | um04306   | 3.00E-83  | um04306   | 21c00004 | 3.00E-83  |
| NNN | 21d00002 | um10119   | 8.00E-16  |           |          |           |
| BBH | 21d00003 | um11033   | 5.00E-68  | um11033   | 21d00003 | 4.00E-68  |
| BBH | 22c00218 | um10260   | 1.00E-117 | um10260   | 22c00218 | 1.00E-111 |

|     |          |           |           |           |          |           |
|-----|----------|-----------|-----------|-----------|----------|-----------|
| BBH | 22c00195 | um01805   | 1.00E-120 | um01805   | 22c00195 | 1.00E-123 |
| BBH | 22c00118 | um01660   | 0         | um01660   | 22c00118 | 1.00E-177 |
| BBH | 22d00144 | um01733   | 1.00E-113 | um01733   | 22d00144 | 1.00E-122 |
| BBH | 22d00150 | um11368   | 6.00E-32  | um11368   | 22d00150 | 6.00E-32  |
| BBH | 22d00100 | um01628.2 | 1.00E-62  | um01628.2 | 22d00100 | 6.00E-43  |
| BBH | 22d00172 | um01784   | 5.00E-85  | um01784   | 22d00172 | 3.00E-85  |
| BBH | 22d00222 | um01885   | 1.00E-160 | um01885   | 22d00222 | 1.00E-170 |
| BBH | 22c00288 | um01959   | 0         | um01959   | 22c00288 | 0         |
| BBH | 22c00289 | um01961   | 0         | um01961   | 22c00289 | 0         |
| BBH | 22d00048 | um01518   | 2.00E-88  | um01518   | 22d00048 | 2.00E-89  |
| NNN | 22d00285 | um01996   | 0         |           |          |           |
| BBH | 22d00257 | um01942   | 1.00E-179 | um01942   | 22d00257 | 1.00E-179 |
| BBH | 22d00159 | um01753   | 1.00E-141 | um01753   | 22d00159 | 1.00E-138 |
| BBH | 22d00234 | um12174   | 0         | um12174   | 22d00234 | 0         |
| BBH | 22c00060 | um01554   | 1.00E-63  | um01554   | 22c00060 | 3.00E-74  |
| BBH | 22d00116 | um01653   | 1.00E-167 | um01653   | 22d00116 | 1.00E-168 |
| BBH | 22d00109 | um01668   | 0         | um01668   | 22d00109 | 0         |
| BBH | 22d00059 | um01539   | 4.00E-21  | um01539   | 22d00059 | 3.00E-20  |
| BBH | 22c00041 | um10799   | 5.00E-76  | um10799   | 22c00041 | 8.00E-71  |
| BBH | 22d00197 | um01833   | 0         | um01833   | 22d00197 | 0         |
| BBH | 22c00290 | um01962   | 0         | um01962   | 22c00290 | 0         |
| BBH | 22d00074 | um11679   | 0         | um11679   | 22d00074 | 0         |
| BBH | 22c00176 | um01765   | 1.00E-162 | um01765   | 22c00176 | 0         |
| BBH | 22d00043 | um01511   | 3.00E-54  | um01511   | 22d00043 | 4.00E-61  |
| BBH | 22d00244 | um10451   | 8.00E-25  | um10451   | 22d00244 | 5.00E-27  |
| BBH | 22c00211 | um12167   | 0         | um12167   | 22c00211 | 0         |
| BBH | 22c00052 | um01533   | 7.00E-83  | um01533   | 22c00052 | 7.00E-83  |
| BBH | 22c00227 | um01854   | 0         | um01854   | 22c00227 | 0         |
| BBH | 22c00145 | um11362   | 1.00E-16  | um11362   | 22c00145 | 9.00E-14  |
| NNN | 22d00004 | um12138.2 | 8.00E-24  |           |          |           |
| BBH | 22d00124 | um01691   | 0         | um01691   | 22d00124 | 0         |
| BBH | 22d00168 | um01776   | 1.00E-119 | um01776   | 22d00168 | 1.00E-112 |
| BBH | 22d00279 | um01988   | 0         | um01988   | 22d00279 | 0         |
| BBH | 22d00027 | um01482   | 0         | um01482   | 22d00027 | 0         |
| BBH | 22d00191 | um10254   | 1.00E-173 | um10254   | 22d00191 | 1.00E-173 |
| BBH | 22c00240 | um01877   | 0         | um01877   | 22c00240 | 0         |
| BBH | 22c00278 | um01943   | 0         | um01943   | 22c00278 | 0         |
| BBH | 22c00235 | um01867.2 | 0         | um01867.2 | 22c00235 | 0         |
| BBH | 22d00200 | um12169   | 0         | um12169   | 22d00200 | 0         |
| BBH | 22c00193 | um01799   | 1.00E-152 | um01799   | 22c00193 | 1.00E-153 |
| BBH | 22c00252 | um01892   | 0         | um01892   | 22c00252 | 0         |
| BBH | 22c00308 | um11382   | 1.00E-118 | um11382   | 22c00308 | 1.00E-122 |
| BBH | 22c00069 | um01568   | 2.00E-28  | um01568   | 22c00069 | 2.00E-27  |
| BBH | 22c00103 | um11136   | 1.00E-135 | um11136   | 22c00103 | 1.00E-134 |
| BBH | 22c00026 | um11818   | 1.00E-160 | um11818   | 22c00026 | 1.00E-159 |
| BBH | 22c00185 | um01771   | 7.00E-67  | um01771   | 22c00185 | 4.00E-67  |
| BBH | 22d00134 | um01712   | 1.00E-104 | um01712   | 22d00134 | 1.00E-104 |
| BBH | 22c00003 | um01445.2 | 0         | um01445.2 | 22c00003 | 0         |
| BBH | 22d00250 | um01932   | 0         | um01932   | 22d00250 | 0         |
| BBH | 22d00092 | um01613   | 1.00E-180 | um01613   | 22d00092 | 1.00E-177 |
| BBH | 22c00129 | um01687   | 0         | um01687   | 22c00129 | 0         |
| BBH | 22c00031 | um11671.2 | 5.00E-17  | um11671.2 | 22c00031 | 1.00E-17  |
| BBH | 22c00301 | um01985   | 6.00E-20  | um01985   | 22c00301 | 7.00E-16  |
| BBH | 22c00079 | um11692   | 0         | um11692   | 22c00079 | 0         |
| BBH | 22c00119 | um01658   | 0         | um01658   | 22c00119 | 0         |
| BBH | 22d00080 | um01577   | 2.00E-89  | um01577   | 22d00080 | 8.00E-97  |
| BBH | 22d00295 | um02017   | 1.00E-135 | um02017   | 22d00295 | 1.00E-139 |
| BBH | 22d00110 | um01667   | 2.00E-94  | um01667   | 22d00110 | 9.00E-85  |
| BBH | 22c00297 | um11379   | 0         | um11379   | 22c00297 | 0         |
| NNN | 22d00017 | um11660.2 | 0         |           |          |           |
| BBH | 22c00070 | um11681   | 3.00E-26  | um11681   | 22c00070 | 6.00E-35  |
| BBH | 22d00167 | um01777   | 1.00E-142 | um01777   | 22d00167 | 1.00E-142 |

|     |          |           |           |           |          |           |
|-----|----------|-----------|-----------|-----------|----------|-----------|
| NNN | 22c00038 | um11881   | 4.00E-13  | um11881   | 22c00037 | 0         |
| NNN | 22c00168 | um01752   | 1.00E-124 |           |          |           |
| BBH | 22c00263 | um01919   | 2.00E-88  | um01919   | 22c00263 | 6.00E-87  |
| BBH | 22d00068 | um10817   | 2.00E-97  | um10817   | 22d00068 | 3.00E-97  |
| BBH | 22d00089 | um01606   | 0         | um01606   | 22d00089 | 0         |
| BBH | 22d00102 | um01632   | 4.00E-71  | um01632   | 22d00102 | 6.00E-81  |
| BBH | 22d00232 | um10270   | 0         | um10270   | 22d00232 | 0         |
| BBH | 22d00229 | um01902.2 | 0         | um01902.2 | 22d00229 | 0         |
| BBH | 22c00156 | um01724   | 2.00E-81  | um01724   | 22c00156 | 5.00E-82  |
| BBH | 22c00135 | um01690   | 5.00E-26  | um01690   | 22c00135 | 2.00E-27  |
| NNN | 22c00093 | um02473   | 3.00E-13  | um02473   | 12d00091 | 3.00E-15  |
| NNN | 22c00098 | um01627   | 0         |           |          |           |
| NNN | 22c00013 | um01466   | 0         | um01466   | 10c00046 | 3.00E-74  |
| BBH | 22c00259 | um01908   | 2.00E-94  | um01908   | 22c00259 | 9.00E-97  |
| BBH | 22c00204 | um01814   | 1.00E-121 | um01814   | 22c00204 | 1.00E-150 |
| BBH | 22c00313 | um02002   | 0         | um02002   | 22c00313 | 0         |
| BBH | 22d00171 | um10876   | 1.00E-111 | um10876   | 22d00171 | 1.00E-111 |
| BBH | 22d00223 | um01886   | 0         | um01886   | 22d00223 | 0         |
| BBH | 22c00123 | um01654   | 1.00E-122 | um01654   | 22c00123 | 1.00E-116 |
| BBH | 22c00161 | um01731   | 0         | um01731   | 22c00161 | 0         |
| BBH | 22c00087 | um01612   | 0         | um01612   | 22c00087 | 0         |
| BBH | 22d00174 | um01788   | 1.00E-133 | um01788   | 22d00174 | 1.00E-130 |
| BBH | 22c00234 | um10263   | 0         | um10263   | 22c00234 | 0         |
| BBH | 22d00219 | um12171   | 1.00E-144 | um12171   | 22d00219 | 1.00E-141 |
| BBH | 22d00117 | um11894   | 1.00E-146 | um11894   | 22d00117 | 1.00E-137 |
| BBH | 22d00235 | um10272   | 5.00E-32  | um10272   | 22d00235 | 5.00E-30  |
| BBH | 22d00145 | um01734   | 9.00E-54  | um01734   | 22d00145 | 5.00E-55  |
| BBH | 22d00198 | um01845   | 0         | um01845   | 22d00198 | 0         |
| BBH | 22d00184 | um01813   | 0         | um01813   | 22d00184 | 0         |
| BBH | 22d00112 | um01664   | 1.00E-169 | um01664   | 22d00112 | 1.00E-160 |
| BBH | 22c00137 | um11358   | 0         | um11358   | 22c00137 | 0         |
| BBH | 22d00157 | um10868   | 1.00E-159 | um10868   | 22d00157 | 1.00E-178 |
| BBH | 22c00175 | um01763   | 1.00E-154 | um01763   | 22c00175 | 1.00E-151 |
| BBH | 22c00228 | um01855   | 0         | um01855   | 22c00228 | 0         |
| BBH | 22c00217 | um01834   | 1.00E-152 | um01834   | 22c00217 | 1.00E-161 |
| BBH | 22c00084 | um01607   | 9.00E-58  | um01607   | 22c00084 | 6.00E-62  |
| BBH | 22c00261 | um01913   | 1.00E-161 | um01913   | 22c00261 | 1.00E-158 |
| BBH | 22c00099 | um11886   | 2.00E-75  | um11886   | 22c00099 | 1.00E-76  |
| BBH | 22d00091 | um11697   | 0         | um11697   | 22d00091 | 0         |
| BBH | 22d00192 | um01824   | 1.00E-128 | um01824   | 22d00192 | 1.00E-128 |
| BBH | 22d00032 | um11674   | 1.00E-179 | um11674   | 22d00032 | 0         |
| BBH | 22d00211 | um01859   | 0         | um01859   | 22d00211 | 0         |
| BBH | 22c00100 | um15073   | 1.00E-105 | um15073   | 22c00100 | 1.00E-118 |
| BBH | 22c00196 | um01804   | 0         | um01804   | 22c00196 | 0         |
| BBH | 22d00123 | um01671   | 0         | um01671   | 22d00123 | 0         |
| BBH | 22d00169 | um01773   | 5.00E-83  | um01773   | 22d00169 | 2.00E-83  |
| BBH | 22d00021 | um11663   | 1.00E-139 | um11663   | 22d00021 | 1.00E-139 |
| BBH | 22d00019 | um11662   | 1.00E-169 | um11662   | 22d00019 | 1.00E-169 |
| BBH | 22d00254 | um01936   | 0         | um01936   | 22d00254 | 0         |
| BBH | 22d00201 | um10258   | 2.00E-72  | um10258   | 22d00201 | 7.00E-80  |
| BBH | 22c00194 | um01800   | 3.00E-70  | um01800   | 22c00194 | 3.00E-64  |
| BBH | 22c00062 | um01556   | 0         | um01556   | 22c00062 | 0         |
| BBH | 22c00053 | um10807   | 0         | um10807   | 22c00053 | 0         |
| BBH | 22c00298 | um01978   | 2.00E-36  | um01978   | 22c00298 | 2.00E-36  |
| BBH | 22c00180 | um10878   | 8.00E-94  | um10878   | 22c00180 | 1.00E-92  |
| BBH | 22d00042 | um01508   | 1.00E-140 | um01508   | 22d00042 | 1.00E-138 |
| BBH | 22c00061 | um10816   | 3.00E-44  | um10816   | 22c00061 | 3.00E-54  |
| BBH | 22d00075 | um11680   | 1.00E-161 | um11680   | 22d00075 | 1.00E-168 |
| BBH | 22d00060 | um10811   | 2.00E-85  | um10811   | 22d00060 | 6.00E-84  |
| BBH | 22c00077 | um01599   | 1.00E-134 | um01599   | 22c00077 | 1.00E-121 |
| BBH | 22d00010 | um01456   | 2.00E-56  | um01456   | 22d00010 | 1.00E-54  |
| BBH | 22d00056 | um01534   | 2.00E-41  | um01534   | 22d00056 | 2.00E-42  |

|     |          |           |           |           |          |           |
|-----|----------|-----------|-----------|-----------|----------|-----------|
| BBH | 22c00110 | um01646   | 0         | um01646   | 22c00110 | 0         |
| BBH | 22c00036 | um11880   | 4.00E-18  | um11880   | 22c00036 | 4.00E-18  |
| BBH | 22d00111 | um11890   | 1.00E-122 | um11890   | 22d00111 | 1.00E-123 |
| BBH | 22c00179 | um10879   | 2.00E-54  | um10879   | 22c00179 | 2.00E-54  |
| NNN | 22d00007 | um11654   | 7.00E-13  |           |          |           |
| BBH | 22c00037 | um11881   | 0         | um11881   | 22c00037 | 0         |
| BBH | 22d00294 | um02015   | 0         | um02015   | 22d00294 | 0         |
| BBH | 22d00202 | um01837   | 0         | um01837   | 22d00202 | 0         |
| BBH | 22c00122 | um12161   | 0         | um12161   | 22c00122 | 0         |
| BBH | 22c00058 | um10814   | 1.00E-133 | um10814   | 22c00058 | 1.00E-149 |
| NNN | 22c00111 | um01647   | 0         |           |          |           |
| BBH | 22c00300 | um01984   | 1.00E-168 | um01984   | 22c00300 | 1.00E-177 |
| BBH | 22c00188 | um01786   | 0         | um01786   | 22c00188 | 0         |
| BBH | 22d00135 | um01713   | 5.00E-33  | um01713   | 22d00135 | 9.00E-31  |
| BBH | 22c00233 | um10262   | 2.00E-38  | um10262   | 22c00233 | 1.00E-31  |
| BBH | 22c00102 | um01634   | 1.00E-53  | um01634   | 22c00102 | 1.00E-53  |
| BBH | 22d00018 | um11661.2 | 0         | um11661.2 | 22d00018 | 0         |
| BBH | 22c00002 | um11876   | 1.00E-106 | um11876   | 22c00002 | 0         |
| NNN | 22c00130 | um11357   | 0         |           |          |           |
| BBH | 22c00262 | um01916   | 2.00E-57  | um01916   | 22c00262 | 2.00E-44  |
| BBH | 22d00233 | um10271   | 2.00E-72  | um10271   | 22d00233 | 1.00E-65  |
| BBH | 22d00251 | um01934   | 1.00E-105 | um01934   | 22d00251 | 1.00E-105 |
| BBH | 22d00090 | um01608   | 1.00E-108 | um01608   | 22d00090 | 1.00E-101 |
| BBH | 22c00014 | um01464   | 0         | um01464   | 22c00014 | 0         |
| BBH | 22c00203 | um01812   | 0         | um01812   | 22c00203 | 0         |
| BBH | 22c00312 | um11386   | 1.00E-109 | um11386   | 22c00312 | 1.00E-114 |
| BBH | 22d00121 | um11896   | 1.00E-138 | um11896   | 22d00121 | 1.00E-139 |
| BBH | 22c00167 | um10867   | 2.00E-86  | um10867   | 22c00167 | 2.00E-84  |
| BBH | 22d00069 | um01559   | 0         | um01559   | 22d00069 | 0         |
| BBH | 22c00258 | um12175   | 0         | um12175   | 22c00258 | 0         |
| BBH | 22c00251 | um01891   | 0         | um01891   | 22c00251 | 0         |
| BBH | 22c00025 | um11817   | 0         | um11817   | 22c00025 | 0         |
| BBH | 22c00153 | um11365   | 0         | um11365   | 22c00153 | 0         |
| BBH | 22c00030 | um11668   | 0         | um11668   | 22c00030 | 0         |
| BBH | 22d00101 | um11134   | 4.00E-54  | um11134   | 22d00101 | 4.00E-54  |
| BBH | 22d00103 | um11135   | 4.00E-39  | um11135   | 22d00103 | 6.00E-40  |
| BBH | 22c00094 | um01617   | 1.00E-134 | um01617   | 22c00094 | 1.00E-130 |
| BBH | 22d00046 | um01515   | 1.00E-161 | um01515   | 22d00046 | 1.00E-161 |
| BBH | 22c00143 | um01703   | 0         | um01703   | 22c00143 | 0         |
| NNN | 22c00220 | um10259   | 2.00E-17  |           |          |           |
| BBH | 22c00142 | um01700   | 0         | um01700   | 22c00142 | 0         |
| BBH | 22c00243 | um12172   | 1.00E-110 | um12172   | 22c00243 | 1.00E-117 |
| BBH | 22d00199 | um01843   | 0         | um01843   | 22d00199 | 0         |
| BBH | 22d00280 | um11381   | 5.00E-71  | um11381   | 22d00280 | 5.00E-71  |
| BBH | 22c00162 | um01735   | 1.00E-133 | um01735   | 22c00162 | 1.00E-133 |
| BBH | 22c00190 | um01789   | 5.00E-40  | um01789   | 22c00190 | 2.00E-46  |
| BBH | 22d00072 | um01565   | 1.00E-124 | um01565   | 22d00072 | 1.00E-122 |
| BBH | 22c00086 | um01610   | 1.00E-147 | um01610   | 22c00086 | 1.00E-147 |
| BBH | 22c00035 | um01498   | 1.00E-149 | um01498   | 22c00035 | 1.00E-153 |
| BBH | 22c00183 | um01775   | 0         | um01775   | 22c00183 | 0         |
| BBH | 22d00025 | um11665   | 0         | um11665   | 22d00025 | 0         |
| BBH | 22c00106 | um01639   | 0         | um01639   | 22c00106 | 0         |
| BBH | 22c00279 | um01944   | 0         | um01944   | 22c00279 | 0         |
| BBH | 22d00210 | um01857   | 1.00E-157 | um01857   | 22d00210 | 1.00E-162 |
| BBH | 22d00218 | um01874   | 0         | um01874   | 22d00218 | 0         |
| BBH | 22c00076 | um01597   | 1.00E-102 | um01597   | 22c00076 | 1.00E-111 |
| BBH | 22d00035 | um15072   | 1.00E-144 | um15072   | 22d00035 | 1.00E-144 |
| BBH | 22d00094 | um11699   | 3.00E-41  | um11699   | 22d00094 | 2.00E-38  |
| BBH | 22c00174 | um01761   | 1.00E-124 | um01761   | 22c00174 | 1.00E-162 |
| BBH | 22d00277 | um01983   | 7.00E-48  | um01983   | 22d00277 | 4.00E-28  |
| NNN | 22d00146 | um01736   | 9.00E-63  |           |          |           |
| BBH | 22c00225 | um01851   | 3.00E-44  | um01851   | 22c00225 | 2.00E-46  |



|     |          |           |           |           |          |           |
|-----|----------|-----------|-----------|-----------|----------|-----------|
| BBH | 22d00020 | um01470   | 0         | um01470   | 22d00020 | 0         |
| BBH | 22d00139 | um01720   | 0         | um01720   | 22d00139 | 0         |
| BBH | 22d00162 | um12163   | 9.00E-32  | um12163   | 22d00162 | 9.00E-32  |
| BBH | 22d00252 | um01935   | 1.00E-129 | um01935   | 22d00252 | 1.00E-122 |
| BBH | 22d00236 | um10273   | 1.00E-139 | um10273   | 22d00236 | 1.00E-139 |
| BBH | 22c00126 | um11892   | 1.00E-168 | um11892   | 22c00126 | 1.00E-177 |
| BBH | 22d00287 | um11384   | 8.00E-50  | um11384   | 22d00287 | 3.00E-56  |
| BBH | 22d00293 | um02012   | 0         | um02012   | 22d00293 | 0         |
| BBH | 22d00173 | um01787   | 0         | um01787   | 22d00173 | 0         |
| BBH | 22c00281 | um01948   | 3.00E-37  | um01948   | 22c00281 | 2.00E-37  |
| BBH | 22d00118 | um01673   | 0         | um01673   | 22d00118 | 0         |
| BBH | 22c00048 | um01524   | 4.00E-41  | um01524   | 22c00048 | 3.00E-48  |
| BBH | 22d00057 | um01535   | 5.00E-84  | um01535   | 22d00057 | 1.00E-86  |
| NNN | 22d00005 | um10815   | 3.00E-71  | um10815   | 22d00064 | 0         |
| BBH | 22d00264 | um10457   | 1.00E-55  | um10457   | 22d00264 | 2.00E-62  |
| BBH | 22d00104 | um01640   | 1.00E-150 | um01640   | 22d00104 | 1.00E-149 |
| BBH | 22d00149 | um11367   | 1.00E-145 | um11367   | 22d00149 | 1.00E-146 |
| NNN | 22d00160 | um01755   | 5.00E-99  |           |          |           |
| BBH | 22c00158 | um01726   | 1.00E-100 | um01726   | 22c00158 | 1.00E-100 |
| BBH | 22d00122 | um01677   | 2.00E-44  | um01677   | 22d00122 | 8.00E-50  |
| BBH | 22d00065 | um01549   | 1.00E-134 | um01549   | 22d00065 | 1.00E-122 |
| BBH | 22d00152 | um11370.2 | 1.00E-103 | um11370.2 | 22d00152 | 1.00E-98  |
| BBH | 22c00067 | um01564   | 0         | um01564   | 22c00067 | 0         |
| BBH | 22d00120 | um01686.2 | 0         | um01686.2 | 22d00120 | 0         |
| BBH | 22c00095 | um01615   | 2.00E-94  | um01615   | 22c00095 | 1.00E-101 |
| BBH | 22c00219 | um01844   | 1.00E-146 | um01844   | 22c00219 | 1.00E-148 |
| BBH | 22c00311 | um11385   | 1.00E-128 | um11385   | 22c00311 | 1.00E-132 |
| BBH | 22d00240 | um12177   | 0         | um12177   | 22d00240 | 0         |
| BBH | 22c00315 | um02008   | 0         | um02008   | 22c00315 | 0         |
| BBH | 22c00202 | um01811   | 1.00E-144 | um01811   | 22c00202 | 1.00E-149 |
| BBH | 22c00276 | um01939   | 3.00E-29  | um01939   | 22c00276 | 4.00E-27  |
| BBH | 22d00183 | um01808   | 1.00E-104 | um01808   | 22d00183 | 1.00E-102 |
| NNN | 22c00305 | um01990   | 0         | um01990   | 9d00207  | 2.00E-19  |
| BBH | 22d00136 | um01714   | 0         | um01714   | 22d00136 | 0         |
| BBH | 22c00299 | um01981   | 0         | um01981   | 22c00299 | 0         |
| BBH | 22c00303 | um01987   | 4.00E-38  | um01987   | 22c00303 | 2.00E-42  |
| NNN | 22c00250 | um10608   | 1.00E-133 | um10608   | 26d00102 | 0         |
| BBH | 22d00071 | um10822   | 8.00E-88  | um10822   | 22d00071 | 1.00E-92  |
| BBH | 22c00133 | um01680   | 0         | um01680   | 22c00133 | 0         |
| BBH | 22c00127 | um01689   | 4.00E-41  | um01689   | 22c00127 | 1.00E-41  |
| BBH | 22c00295 | um01970   | 5.00E-49  | um01970   | 22c00295 | 2.00E-49  |
| BBH | 22c00277 | um01940   | 1.00E-49  | um01940   | 22c00277 | 2.00E-58  |
| BBH | 22d00163 | um01762   | 0         | um01762   | 22d00163 | 0         |
| BBH | 22d00190 | um10253.2 | 1.00E-129 | um10253.2 | 22d00190 | 1.00E-126 |
| BBH | 22d00256 | um01941   | 0         | um01941   | 22d00256 | 0         |
| BBH | 22d00049 | um01519   | 0         | um01519   | 22d00049 | 0         |
| BBH | 22d00034 | um11677.2 | 0         | um11677.2 | 22d00034 | 0         |
| NNN | 22c00034 | um10207   | 1.00E-108 | um10207   | 15d00042 | 0         |
| BBH | 22d00266 | um01965   | 0         | um01965   | 22d00266 | 0         |
| BBH | 22c00051 | um01531   | 0         | um01531   | 22c00051 | 0         |
| BBH | 22c00212 | um01829   | 0         | um01829   | 22c00212 | 0         |
| BBH | 22d00292 | um02010   | 0         | um02010   | 22d00292 | 0         |
| BBH | 22c00198 | um01802   | 1.00E-175 | um01802   | 22c00198 | 1.00E-174 |
| BBH | 22c00244 | um01882   | 0         | um01882   | 22c00244 | 0         |
| BBH | 22d00073 | um01569   | 0         | um01569   | 22d00073 | 0         |
| BBH | 22d00176 | um01791   | 0         | um01791   | 22d00176 | 0         |
| BBH | 22c00232 | um01863   | 0         | um01863   | 22c00232 | 0         |
| BBH | 22c00027 | um11819   | 1.00E-142 | um11819   | 22c00027 | 1.00E-148 |
| BBH | 22d00237 | um12176   | 9.00E-57  | um12176   | 22d00237 | 7.00E-54  |
| BBH | 22d00217 | um01872   | 0         | um01872   | 22d00217 | 0         |
| BBH | 22c00282 | um01951   | 1.00E-111 | um01951   | 22c00282 | 1.00E-111 |
| BBH | 22d00119 | um01672   | 1.00E-145 | um01672   | 22d00119 | 1.00E-136 |

|     |          |           |           |           |          |           |
|-----|----------|-----------|-----------|-----------|----------|-----------|
| BBH | 22c00049 | um01528   | 0         | um01528   | 22c00049 | 0         |
| BBH | 22c00020 | um15040   | 0         | um15040   | 22c00020 | 0         |
| BBH | 22d00208 | um01853   | 1.00E-134 | um01853   | 22d00208 | 1.00E-127 |
| BBH | 22d00063 | um01547   | 0         | um01547   | 22d00063 | 0         |
| BBH | 22d00147 | um01737.2 | 0         | um01737.2 | 22d00147 | 0         |
| BBH | 22c00125 | um11893   | 2.00E-80  | um11893   | 22c00125 | 1.00E-83  |
| BBH | 22c00117 | um15042   | 1.00E-156 | um15042   | 22c00117 | 1.00E-158 |
| BBH | 22c00226 | um01852   | 0         | um01852   | 22c00226 | 0         |
| BBH | 22d00151 | um11369   | 1.00E-166 | um11369   | 22d00151 | 1.00E-171 |
| BBH | 22c00144 | um01705   | 1.00E-160 | um01705   | 22c00144 | 1.00E-165 |
| BBH | 22c00201 | um10248   | 1.00E-179 | um10248   | 22c00201 | 1.00E-170 |
| BBH | 22c00155 | um01723   | 0         | um01723   | 22c00155 | 0         |
| BBH | 22c00150 | um01709   | 1.00E-52  | um01709   | 22c00150 | 3.00E-79  |
| NNN | 22c00012 | um11659   | 0         |           |          |           |
| BBH | 22c00310 | um11383   | 1.00E-118 | um11383   | 22c00310 | 1.00E-149 |
| BBH | 22c00160 | um01730   | 1.00E-157 | um01730   | 22c00160 | 1.00E-161 |
| BBH | 22c00314 | um02005   | 0         | um02005   | 22c00314 | 0         |
| BBH | 22d00062 | um10813   | 0         | um10813   | 22d00062 | 0         |
| BBH | 22c00068 | um01567   | 1.00E-125 | um01567   | 22c00068 | 1.00E-125 |
| BBH | 22c00096 | um11884.2 | 9.00E-48  | um11884.2 | 22c00096 | 8.00E-45  |
| BBH | 22d00093 | um01623   | 7.00E-59  | um01623   | 22d00093 | 4.00E-71  |
| BBH | 22d00105 | um11137.2 | 1.00E-112 | um11137.2 | 22d00105 | 1.00E-114 |
| BBH | 22d00265 | um11374   | 0         | um11374   | 22d00265 | 0         |
| BBH | 22c00169 | um10869.2 | 1.00E-39  | um10869.2 | 22c00169 | 9.00E-44  |
| BBH | 22c00231 | um01862   | 1.00E-171 | um01862   | 22c00231 | 1.00E-174 |
| BBH | 22d00261 | um01950   | 1.00E-157 | um01950   | 22d00261 | 1.00E-157 |
| BBH | 22d00209 | um01856   | 1.00E-115 | um01856   | 22d00209 | 1.00E-125 |
| BBH | 22c00128 | um01688   | 0         | um01688   | 22c00128 | 0         |
| BBH | 22c00209 | um12165   | 8.00E-96  | um12165   | 22c00209 | 3.00E-92  |
| BBH | 22c00109 | um01645   | 1.00E-112 | um01645   | 22c00109 | 1.00E-115 |
| BBH | 22c00283 | um01952   | 0         | um01952   | 22c00283 | 0         |
| BBH | 22c00134 | um01679   | 0         | um01679   | 22c00134 | 0         |
| BBH | 22d00081 | um11685   | 2.00E-86  | um11685   | 22d00081 | 3.00E-82  |
| BBH | 22c00028 | um01479   | 1.00E-100 | um01479   | 22c00028 | 5.00E-96  |
| BBH | 22c00296 | um01974   | 0         | um01974   | 22c00296 | 0         |
| BBH | 22d00286 | um06265   | 9.00E-22  | um06265   | 22d00286 | 4.00E-22  |
| BBH | 22c00040 | um01504   | 7.00E-34  | um01504   | 22c00040 | 4.00E-30  |
| BBH | 22c00245 | um12173   | 5.00E-17  | um12173   | 22c00245 | 5.00E-11  |
| BBH | 22c00124 | um01652   | 0         | um01652   | 22c00124 | 0         |
| BBH | 22c00260 | um01911   | 1.00E-173 | um01911   | 22c00260 | 1.00E-173 |
| BBH | 22c00304 | um01989   | 1.00E-115 | um01989   | 22c00304 | 1.00E-120 |
| BBH | 22d00186 | um01817   | 9.00E-47  | um01817   | 22d00186 | 3.00E-54  |
| BBH | 22c00302 | um01986   | 0         | um01986   | 22c00302 | 0         |
| BBH | 22c00186 | um10875   | 4.00E-99  | um10875   | 22c00186 | 1.00E-103 |
| BBH | 22c00257 | um01905   | 1.00E-110 | um01905   | 22c00257 | 1.00E-110 |
| BBH | 22d00137 | um01716   | 7.00E-55  | um01716   | 22d00137 | 3.00E-54  |
| BBH | 22d00008 | um11656   | 1.00E-143 | um11656   | 22d00008 | 1.00E-144 |
| BBH | 22c00151 | um11364   | 0         | um11364   | 22c00151 | 0         |
| BBH | 22c00019 | um12140   | 7.00E-30  | um12140   | 22c00019 | 7.00E-32  |
| BBH | 22d00130 | um11361.2 | 0         | um11361.2 | 22d00130 | 0         |
| BBH | 22d00084 | um11689   | 1.00E-143 | um11689   | 22d00084 | 1.00E-137 |
| BBH | 22d00291 | um02007   | 2.00E-88  | um02007   | 22d00291 | 1.00E-89  |
| NNN | 22c00132 | um01682   | 2.00E-82  |           |          |           |
| BBH | 22c00009 | um11655   | 1.00E-116 | um11655   | 22c00009 | 1.00E-128 |
| NNN | 22d00097 | um01624   | 4.00E-37  |           |          |           |
| BBH | 22c00293 | um01967   | 1.00E-106 | um01967   | 22c00293 | 1.00E-103 |
| BBH | 22d00206 | um01850   | 1.00E-82  | um01850   | 22d00206 | 2.00E-82  |
| BBH | 22c00241 | um01879   | 0         | um01879   | 22c00241 | 0         |
| BBH | 22c00010 | um11657   | 0         | um11657   | 22c00010 | 0         |
| BBH | 22c00081 | um11695   | 0         | um11695   | 22c00081 | 0         |
| NNN | 22c00165 | um01742   | 1.00E-129 |           |          |           |
| NNN | 22c00267 | um01926   | 1.00E-130 | um01926   | 22c00268 | 1.00E-138 |

|     |          |           |           |           |          |           |
|-----|----------|-----------|-----------|-----------|----------|-----------|
| BBH | 22d00224 | um01893   | 1.00E-135 | um01893   | 22d00224 | 1.00E-132 |
| BBH | 22d00188 | um01820   | 7.00E-54  | um01820   | 22d00188 | 7.00E-59  |
| NNN | 22d00141 | um11366   | 1.00E-129 |           |          |           |
| BBH | 22d00267 | um01966   | 0         | um01966   | 22d00267 | 0         |
| BBH | 22c00104 | um01637   | 1.00E-112 | um01637   | 22c00104 | 1.00E-112 |
| BBH | 22d00216 | um01871   | 0         | um01871   | 22d00216 | 0         |
| BBH | 22c00055 | um01540   | 0         | um01540   | 22c00055 | 0         |
| BBH | 22d00242 | um10449.2 | 2.00E-61  | um10449.2 | 22d00242 | 1.00E-67  |
| BBH | 22c00114 | um01670   | 0         | um01670   | 22c00114 | 0         |
| BBH | 22d00054 | um01530   | 0         | um01530   | 22d00054 | 0         |
| BBH | 22c00239 | um10265   | 3.00E-53  | um10265   | 22c00239 | 2.00E-50  |
| BBH | 22d00014 | um01465   | 1.00E-172 | um01465   | 22d00014 | 0         |
| BBH | 22c00256 | um01903   | 1.00E-143 | um01903   | 22c00256 | 1.00E-143 |
| BBH | 22c00088 | um01614   | 0         | um01614   | 22c00088 | 0         |
| BBH | 22d00275 | um01980   | 0         | um01980   | 22d00275 | 0         |
| BBH | 22c00318 | um02016   | 1.00E-93  | um02016   | 22c00318 | 1.00E-93  |
| BBH | 22d00078 | um01574   | 0         | um01574   | 22d00078 | 0         |
| BBH | 22d00289 | um02004   | 1.00E-102 | um02004   | 22d00289 | 1.00E-106 |
| BBH | 22d00185 | um01815   | 1.00E-120 | um01815   | 22d00185 | 1.00E-124 |
| BBH | 22c00249 | um01889   | 0         | um01889   | 22c00249 | 0         |
| NNN | 22d00129 | um11360   | 0         |           |          |           |
| BBH | 22d00178 | um01794   | 0         | um01794   | 22d00178 | 0         |
| BBH | 22c00273 | um01933   | 2.00E-20  | um01933   | 22c00273 | 2.00E-20  |
| BBH | 22d00175 | um01790   | 0         | um01790   | 22d00175 | 0         |
| BBH | 22d00044 | um01513   | 1.00E-34  | um01513   | 22d00044 | 2.00E-33  |
| BBH | 22c00056 | um10810   | 1.00E-159 | um10810   | 22c00056 | 1.00E-163 |
| BBH | 22c00046 | um01521   | 0         | um01521   | 22c00046 | 0         |
| BBH | 22d00260 | um01949   | 1.00E-85  | um01949   | 22d00260 | 5.00E-93  |
| BBH | 22d00258 | um01946   | 0         | um01946   | 22d00258 | 0         |
| BBH | 22d00050 | um01526   | 1.00E-165 | um01526   | 22d00050 | 1.00E-168 |
| BBH | 22d00001 | um06350   | 2.00E-68  | um06350   | 22d00001 | 2.00E-68  |
| BBH | 22d00024 | um01478   | 1.00E-163 | um01478   | 22d00024 | 1.00E-177 |
| BBH | 22c00173 | um01759   | 1.00E-134 | um01759   | 22c00173 | 1.00E-101 |
| BBH | 22c00149 | um11363   | 1.00E-140 | um11363   | 22c00149 | 1.00E-138 |
| BBH | 22c00075 | um01595   | 2.00E-58  | um01595   | 22c00075 | 1.00E-63  |
| BBH | 22d00164 | um10872   | 1.00E-109 | um10872   | 22d00164 | 3.00E-99  |
| BBH | 22d00155 | um01748   | 1.00E-157 | um01748   | 22d00155 | 1.00E-168 |
| BBH | 22c00320 | um02019   | 1.00E-177 | um02019   | 22c00320 | 0         |
| BBH | 22d00037 | um01501   | 0         | um01501   | 22d00037 | 0         |
| BBH | 22d00193 | um01826   | 0         | um01826   | 22d00193 | 0         |
| BBH | 22c00294 | um01968   | 0         | um01968   | 22c00294 | 0         |
| BBH | 22c00140 | um01696   | 0         | um01696   | 22c00140 | 0         |
| BBH | 22c00215 | um03748   | 3.00E-15  | um03748   | 22c00215 | 9.00E-16  |
| BBH | 22d00271 | um01976   | 4.00E-72  | um01976   | 22d00271 | 1.00E-72  |
| BBH | 22c00230 | um01860   | 4.00E-60  | um01860   | 22c00230 | 3.00E-60  |
| NNN | 22c00107 | um01641   | 8.00E-79  |           |          |           |
| BBH | 22d00138 | um01718   | 1.00E-155 | um01718   | 22d00138 | 1.00E-168 |
| BBH | 22d00290 | um02006   | 1.00E-115 | um02006   | 22d00290 | 1.00E-106 |
| BBH | 22c00285 | um01954   | 1.00E-97  | um01954   | 22c00285 | 1.00E-100 |
| BBH | 22d00083 | um11688   | 4.00E-12  | um11688   | 22d00083 | 9.00E-12  |
| BBH | 22d00288 | um01999   | 0         | um01999   | 22d00288 | 0         |
| BBH | 22d00096 | um01616   | 3.00E-37  | um01616   | 22d00096 | 5.00E-38  |
| BBH | 22c00008 | um01450   | 0         | um01450   | 22c00008 | 0         |
| BBH | 22c00115 | um01669   | 0         | um01669   | 22c00115 | 0         |
| NNN | 22c00307 | um11382   | 2.00E-40  | um11382   | 22c00308 | 1.00E-122 |
| BBH | 22d00131 | um01706   | 2.00E-43  | um01706   | 22d00131 | 3.00E-38  |
| BBH | 22c00184 | um01774   | 0         | um01774   | 22c00184 | 0         |
| BBH | 22c00029 | um11666   | 2.00E-60  | um11666   | 22c00029 | 2.00E-59  |
| BBH | 22d00106 | um01643   | 2.00E-97  | um01643   | 22d00106 | 3.00E-97  |
| BBH | 22c00275 | um01937   | 0         | um01937   | 22c00275 | 0         |
| BBH | 22c00011 | um11658   | 2.00E-45  | um11658   | 22c00011 | 2.00E-47  |
| BBH | 22c00254 | um01899   | 0         | um01899   | 22c00254 | 0         |

|     |          |           |           |           |          |           |
|-----|----------|-----------|-----------|-----------|----------|-----------|
| BBH | 22c00080 | um11693   | 1.00E-171 | um11693   | 22c00080 | 0         |
| BBH | 22c00242 | um01881   | 1.00E-157 | um01881   | 22c00242 | 1.00E-157 |
| BBH | 22c00152 | um01717   | 0         | um01717   | 22c00152 | 0         |
| BBH | 22c00223 | um01835   | 0         | um01835   | 22c00223 | 0         |
| BBH | 22d00225 | um01894   | 1.00E-124 | um01894   | 22d00225 | 1.00E-124 |
| BBH | 22d00187 | um10251   | 0         | um10251   | 22d00187 | 0         |
| NNN | 22d00207 | um03425   | 8.00E-14  | um03425   | 8d00108  | 0         |
| BBH | 22d00003 | um11875   | 1.00E-177 | um11875   | 22d00003 | 1.00E-177 |
| BBH | 22c00274 | um12342   | 1.00E-67  | um12342   | 22c00274 | 1.00E-70  |
| BBH | 22d00153 | um15043.2 | 0         | um15043.2 | 22d00153 | 0         |
| BBH | 22d00263 | um10456   | 1.00E-144 | um10456   | 22d00263 | 1.00E-143 |
| BBH | 22c00214 | um01830   | 0         | um01830   | 22c00214 | 0         |
| BBH | 22d00128 | um01701   | 1.00E-134 | um01701   | 22d00128 | 1.00E-119 |
| BBH | 22c00248 | um01888   | 0         | um01888   | 22c00248 | 0         |
| BBH | 22d00238 | um10274   | 2.00E-29  | um10274   | 22d00238 | 2.00E-29  |
| BBH | 22c00207 | um01821   | 0         | um01821   | 22c00207 | 1.00E-173 |
| BBH | 22d00177 | um01793   | 0         | um01793   | 22d00177 | 0         |
| BBH | 22d00272 | um01977   | 1.00E-133 | um01977   | 22d00272 | 1.00E-134 |
| NNN | 22c00090 | um01621   | 0         |           |          |           |
| BBH | 22c00045 | um01523   | 1.00E-49  | um01523   | 22c00045 | 8.00E-49  |
| BBH | 22c00166 | um01747   | 1.00E-156 | um01747   | 22c00166 | 1.00E-156 |
| BBH | 22d00055 | um01532   | 5.00E-72  | um01532   | 22d00055 | 4.00E-70  |
| BBH | 22c00224 | um01849   | 0         | um01849   | 22c00224 | 0         |
| BBH | 22c00238 | um01875   | 0         | um01875   | 22c00238 | 0         |
| BBH | 22c00083 | um01605   | 1.00E-173 | um01605   | 22c00083 | 1.00E-174 |
| BBH | 22c00266 | um01922   | 1.00E-160 | um01922   | 22c00266 | 1.00E-168 |
| BBH | 22d00070 | um10821   | 0         | um10821   | 22d00070 | 0         |
| NNN | 22d00241 | um01923   | 0         |           |          |           |
| BBH | 22d00154 | um15074   | 0         | um15074   | 22d00154 | 0         |
| BBH | 22c00255 | um01900   | 0         | um01900   | 22c00255 | 0         |
| BBH | 22c00057 | um01544   | 0         | um01544   | 22c00057 | 0         |
| BBH | 22d00036 | um01499   | 9.00E-57  | um01499   | 22d00036 | 2.00E-51  |
| BBH | 22d00079 | um11684   | 1.00E-57  | um11684   | 22d00079 | 7.00E-58  |
| BBH | 22c00116 | um01665   | 1.00E-85  | um01665   | 22c00116 | 5.00E-92  |
| BBH | 22d00194 | um01827   | 0         | um01827   | 22d00194 | 0         |
| BBH | 22c00170 | um10870   | 1.00E-138 | um10870   | 22c00170 | 1.00E-146 |
| BBH | 22c00319 | um02018   | 0         | um02018   | 22c00319 | 0         |
| BBH | 22d00095 | um01619   | 0         | um01619   | 22d00095 | 0         |
| BBH | 22d00047 | um10803   | 0         | um10803   | 22d00047 | 0         |
| BBH | 22d00064 | um10815   | 0         | um10815   | 22d00064 | 0         |
| BBH | 22c00066 | um10820   | 6.00E-42  | um10820   | 22c00066 | 6.00E-42  |
| BBH | 22d00114 | um01659   | 5.00E-51  | um01659   | 22d00114 | 1.00E-65  |
| BBH | 22c00197 | um01803   | 0         | um01803   | 22c00197 | 0         |
| BBH | 22d00170 | um01772   | 0         | um01772   | 22d00170 | 0         |
| BBH | 22c00047 | um12143   | 1.00E-76  | um12143   | 22c00047 | 1.00E-77  |
| BBH | 22c00073 | um01580   | 0         | um01580   | 22c00073 | 0         |
| BBH | 22c00172 | um01758   | 0         | um01758   | 22c00172 | 0         |
| BBH | 22d00165 | um10874   | 3.00E-62  | um10874   | 22d00165 | 1.00E-60  |
| BBH | 22c00074 | um11687   | 5.00E-86  | um11687   | 22c00074 | 1.00E-89  |
| BBH | 22d00015 | um04130   | 1.00E-110 | um04130   | 22d00015 | 1.00E-116 |
| BBH | 22c00321 | um02021   | 1.00E-135 | um02021   | 22c00321 | 1.00E-137 |
| BBH | 22d00259 | um01947   | 1.00E-160 | um01947   | 22d00259 | 1.00E-161 |
| BBH | 22d00023 | um01475   | 1.00E-37  | um01475   | 22d00023 | 5.00E-38  |
| BBH | 22d00276 | um01982   | 0         | um01982   | 22d00276 | 1.00E-163 |
| BBH | 22c00163 | um01738   | 1.00E-76  | um01738   | 22c00163 | 7.00E-77  |
| NNN | 22c00138 | um11359   | 0         |           |          |           |
| BBH | 22d00255 | um01938   | 0         | um01938   | 22d00255 | 0         |
| BBH | 22d00066 | um01550   | 1.00E-108 | um01550   | 22d00066 | 1.00E-113 |
| BBH | 22d00142 | um01729   | 0         | um01729   | 22d00142 | 0         |
| BBH | 22d00226 | um10268   | 5.00E-21  | um10268   | 22d00226 | 7.00E-24  |
| NNN | 22c00033 | um11675   | 9.00E-39  |           |          |           |
| BBH | 22c00316 | um02011   | 2.00E-40  | um02011   | 22c00316 | 7.00E-41  |

|     |          |           |           |           |          |           |
|-----|----------|-----------|-----------|-----------|----------|-----------|
| BBH | 22d00298 | um02023   | 0         | um02023   | 22d00298 | 0         |
| BBH | 22c00265 | um01920   | 0         | um01920   | 22c00265 | 0         |
| BBH | 22c00015 | um01463   | 1.00E-126 | um01463   | 22c00015 | 1.00E-126 |
| BBH | 22c00023 | um11816   | 0         | um11816   | 22c00023 | 0         |
| BBH | 22d00113 | um01662   | 0         | um01662   | 22d00113 | 0         |
| BBH | 22c00200 | um15089   | 7.00E-93  | um15089   | 22c00200 | 6.00E-96  |
| BBH | 22c00112 | um01648.2 | 1.00E-158 | um01648.2 | 22c00112 | 1.00E-158 |
| BBH | 22d00011 | um01458   | 0         | um01458   | 22d00011 | 0         |
| BBH | 22d00061 | um10812   | 1.00E-134 | um10812   | 22d00061 | 1.00E-140 |
| BBH | 22d00270 | um11378   | 7.00E-64  | um11378   | 22d00270 | 4.00E-64  |
| BBH | 22d00132 | um01708   | 1.00E-179 | um01708   | 22d00132 | 0         |
| BBH | 22c00306 | um01992   | 0         | um01992   | 22c00306 | 0         |
| BBH | 22d00099 | um11885   | 0         | um11885   | 22d00099 | 0         |
| BBH | 22d00087 | um11691   | 0         | um11691   | 22d00087 | 0         |
| BBH | 22c00291 | um01963   | 0         | um01963   | 22c00291 | 0         |
| NNN | 22c00005 | um00079   | 4.00E-98  | um00079   | 9c00055  | 1.00E-161 |
| BBH | 22d00031 | um11672   | 1.00E-133 | um11672   | 22d00031 | 1.00E-132 |
| BBH | 22c00063 | um01558   | 1.00E-120 | um01558   | 22c00063 | 1.00E-115 |
| BBH | 22c00059 | um01551   | 1.00E-137 | um01551   | 22c00059 | 1.00E-149 |
| BBH | 22c00178 | um01768   | 0         | um01768   | 22c00178 | 0         |
| BBH | 22c00072 | um01578   | 0         | um01578   | 22c00072 | 0         |
| BBH | 22d00180 | um10880   | 1.00E-130 | um10880   | 22d00180 | 1.00E-141 |
| BBH | 22c00171 | um01756.2 | 0         | um01756.2 | 22c00171 | 0         |
| BBH | 22d00006 | um11653   | 1.00E-140 | um11653   | 22d00006 | 1.00E-120 |
| BBH | 22d00262 | um01953   | 0         | um01953   | 22d00262 | 0         |
| BBH | 22d00213 | um01864   | 0         | um01864   | 22d00213 | 0         |
| BBH | 22d00029 | um11669   | 8.00E-66  | um11669   | 22d00029 | 6.00E-62  |
| BBH | 22d00203 | um10255   | 1.00E-34  | um10255   | 22d00203 | 2.00E-33  |
| BBH | 22d00195 | um12166   | 4.00E-24  | um12166   | 22d00195 | 1.00E-23  |
| NNN | 22d00022 | um12141   | 1.00E-142 |           |          |           |
| BBH | 22c00054 | um10809.2 | 8.00E-17  | um10809.2 | 22c00054 | 8.00E-17  |
| BBH | 22d00284 | um01995   | 0         | um01995   | 22d00284 | 0         |
| BBH | 22d00230 | um01904   | 1.00E-130 | um01904   | 22d00230 | 1.00E-130 |
| BBH | 22c00139 | um01694   | 0         | um01694   | 22c00139 | 0         |
| BBH | 22d00215 | um01868   | 0         | um01868   | 22d00215 | 0         |
| BBH | 22c00268 | um01926   | 1.00E-137 | um01926   | 22c00268 | 1.00E-138 |
| BBH | 22d00041 | um01507   | 0         | um01507   | 22d00041 | 0         |
| BBH | 22c00191 | um01792   | 1.00E-168 | um01792   | 22c00191 | 1.00E-172 |
| NNN | 22d00098 | um01624   | 0         |           |          |           |
| NNN | 22c00146 | um03223   | 8.00E-15  | um03223   | 14d00078 | 1.00E-29  |
| BBH | 22d00115 | um01657   | 1.00E-160 | um01657   | 22d00115 | 1.00E-169 |
| BBH | 22c00206 | um01818   | 1.00E-140 | um01818   | 22c00206 | 1.00E-149 |
| BBH | 22d00052 | um01527   | 1.00E-148 | um01527   | 22d00052 | 1.00E-161 |
| NNN | 22c00147 | um03223   | 9.00E-18  | um03223   | 14d00078 | 1.00E-29  |
| BBH | 22c00024 | um01476   | 0         | um01476   | 22c00024 | 0         |
| BBH | 22c00237 | um01873   | 0         | um01873   | 22c00237 | 0         |
| BBH | 22c00221 | um10257   | 4.00E-97  | um10257   | 22c00221 | 2.00E-96  |
| BBH | 22c00159 | um01728.2 | 9.00E-86  | um01728.2 | 22c00159 | 9.00E-88  |
| BBH | 22c00121 | um01656   | 0         | um01656   | 22c00121 | 0         |
| BBH | 22c00271 | um01928   | 2.00E-54  | um01928   | 22c00271 | 4.00E-67  |
| BBH | 22d00268 | um01969   | 2.00E-64  | um01969   | 22d00268 | 1.00E-73  |
| BBH | 22d00107 | um01649   | 2.00E-17  | um01649   | 22d00107 | 3.00E-21  |
| NNN | 22c00286 | um01957   | 0         |           |          |           |
| BBH | 22d00012 | um01467   | 0         | um01467   | 22d00012 | 0         |
| BBH | 22d00220 | um10266   | 1.00E-170 | um10266   | 22d00220 | 1.00E-162 |
| BBH | 22c00064 | um01560   | 0         | um01560   | 22c00064 | 0         |
| BBH | 22c00082 | um01604   | 0         | um01604   | 22c00082 | 0         |
| BBH | 22d00127 | um01699   | 0         | um01699   | 22d00127 | 0         |
| BBH | 22d00239 | um10275   | 0         | um10275   | 22d00239 | 0         |
| BBH | 22c00317 | um02014   | 1.00E-116 | um02014   | 22c00317 | 1.00E-117 |
| BBH | 22c00042 | um10800   | 0         | um10800   | 22c00042 | 0         |
| BBH | 22c00032 | um11673   | 1.00E-142 | um11673   | 22c00032 | 1.00E-153 |

|     |          |           |           |           |          |           |
|-----|----------|-----------|-----------|-----------|----------|-----------|
| BBH | 22c00022 | um11815.2 | 1.00E-114 | um11815.2 | 22c00022 | 1.00E-103 |
| BBH | 22d00297 | um02022   | 1.00E-174 | um02022   | 22d00297 | 1.00E-176 |
| BBH | 22d00205 | um01847   | 2.00E-92  | um01847   | 22d00205 | 3.00E-87  |
| BBH | 22d00009 | um01454   | 0         | um01454   | 22d00009 | 0         |
| BBH | 22c00164 | um01739   | 1.00E-152 | um01739   | 22c00164 | 1.00E-164 |
| NNN | 22d00189 | um10252   | 1.00E-137 |           |          |           |
| BBH | 22c00253 | um01897   | 0         | um01897   | 22c00253 | 0         |
| BBH | 22c00229 | um01858   | 0         | um01858   | 22c00229 | 0         |
| NNN | 22d00030 | um11670   | 1.00E-18  |           |          |           |
| BBH | 22d00013 | um01462   | 2.00E-68  | um01462   | 22d00013 | 5.00E-72  |
| BBH | 22c00154 | um01722   | 0         | um01722   | 22c00154 | 0         |
| BBH | 22d00125 | um01692   | 1.00E-100 | um01692   | 22d00125 | 6.00E-98  |
| BBH | 22d00269 | um01971   | 2.00E-44  | um01971   | 22d00269 | 6.00E-44  |
| BBH | 22d00274 | um01979   | 3.00E-60  | um01979   | 22d00274 | 6.00E-59  |
| BBH | 22d00067 | um01552   | 0         | um01552   | 22d00067 | 0         |
| BBH | 22c00044 | um01512   | 0         | um01512   | 22c00044 | 0         |
| BBH | 22c00105 | um01638   | 1.00E-120 | um01638   | 22c00105 | 1.00E-136 |
| BBH | 22d00231 | um01906   | 5.00E-50  | um01906   | 22d00231 | 8.00E-50  |
| BBH | 22d00282 | um01991   | 1.00E-174 | um01991   | 22d00282 | 0         |
| BBH | 22d00086 | um11690   | 1.00E-124 | um11690   | 22d00086 | 1.00E-126 |
| NNN | 22d00085 | um11689   | 3.00E-84  | um11689   | 22d00084 | 1.00E-137 |
| BBH | 22d00039 | um01505   | 7.00E-38  | um01505   | 22d00039 | 1.00E-37  |
| BBH | 22d00108 | um01651   | 1.00E-116 | um01651   | 22d00108 | 1.00E-117 |
| NNN | 22c00092 | um02473   | 3.00E-12  | um02473   | 12d00091 | 3.00E-15  |
| BBH | 22c00006 | um15093   | 0         | um15093   | 22c00006 | 0         |
| BBH | 22c00292 | um01964   | 0         | um01964   | 22c00292 | 0         |
| BBH | 22c00018 | um01469   | 0         | um01469   | 22c00018 | 0         |
| BBH | 22c00309 | um01997.2 | 1.00E-16  | um01997.2 | 22c00309 | 1.00E-14  |
| BBH | 22c00177 | um10873   | 1.00E-128 | um10873   | 22c00177 | 1.00E-129 |
| BBH | 22d00140 | um01721   | 0         | um01721   | 22d00140 | 0         |
| NNN | 22c00004 | um03403.2 | 2.00E-12  | um03403.2 | 8d00113  | 0         |
| BBH | 22c00192 | um01795   | 1.00E-152 | um01795   | 22c00192 | 1.00E-151 |
| BBH | 22c00131 | um01683.2 | 1.00E-160 | um01683.2 | 22c00131 | 1.00E-157 |
| BBH | 22d00133 | um01711   | 0         | um01711   | 22d00133 | 0         |
| BBH | 22c00208 | um01823   | 9.00E-77  | um01823   | 22c00208 | 2.00E-79  |
| BBH | 22d00196 | um01831   | 5.00E-97  | um01831   | 22d00196 | 6.00E-95  |
| BBH | 22c00187 | um01785   | 3.00E-90  | um01785   | 22c00187 | 1.00E-100 |
| BBH | 22d00076 | um11682   | 8.00E-78  | um11682   | 22d00076 | 6.00E-81  |
| BBH | 22d00182 | um11901   | 1.00E-177 | um11901   | 22d00182 | 1.00E-171 |
| BBH | 22d00228 | um01898   | 1.00E-150 | um01898   | 22d00228 | 1.00E-153 |
| BBH | 22c00269 | um01927   | 0         | um01927   | 22c00269 | 0         |
| BBH | 22d00038 | um11882   | 7.00E-70  | um11882   | 22d00038 | 2.00E-67  |
| BBH | 22d00045 | um01514   | 0         | um01514   | 22d00045 | 0         |
| BBH | 22c00097 | um01626   | 1.00E-109 | um01626   | 22c00097 | 1.00E-104 |
| NNN | 22d00214 | um01866   | 5.00E-66  |           |          |           |
| NNN | 22d00212 | um01861   | 1.00E-172 | um01861   | 19d00131 | 1.00E-57  |
| BBH | 22d00077 | um11683   | 0         | um11683   | 22d00077 | 0         |
| BBH | 22d00053 | um01529   | 1.00E-124 | um01529   | 22d00053 | 1.00E-127 |
| BBH | 22c00199 | um11899   | 0         | um11899   | 22c00199 | 0         |
| BBH | 22d00249 | um10452   | 0         | um10452   | 22d00249 | 0         |
| NNN | 22c00148 | um03223   | 4.00E-18  | um03223   | 14d00078 | 1.00E-29  |
| BBH | 22c00071 | um01576   | 1.00E-115 | um01576   | 22c00071 | 1.00E-126 |
| BBH | 22d00028 | um11667   | 0         | um11667   | 22d00028 | 0         |
| BBH | 22d00156 | um01750   | 1.00E-163 | um01750   | 22d00156 | 1.00E-158 |
| BBH | 22c00280 | um01945   | 0         | um01945   | 22c00280 | 0         |
| BBH | 22d00126 | um01697   | 0         | um01697   | 22d00126 | 0         |
| BBH | 22c00113 | um01650   | 1.00E-123 | um01650   | 22c00113 | 1.00E-125 |
| BBH | 22c00039 | um01503   | 0         | um01503   | 22c00039 | 0         |
| BBH | 22d00166 | um01783   | 0         | um01783   | 22d00166 | 0         |
| BBH | 22d00221 | um01883   | 1.00E-122 | um01883   | 22d00221 | 1.00E-122 |
| BBH | 22c00085 | um11696   | 3.00E-70  | um11696   | 22c00085 | 7.00E-70  |
| BBH | 22c00065 | um01561   | 0         | um01561   | 22c00065 | 0         |

|     |          |           |           |           |          |           |
|-----|----------|-----------|-----------|-----------|----------|-----------|
| BBH | 22c00272 | um01931   | 0         | um01931   | 22c00272 | 0         |
| BBH | 22c00205 | um01816   | 1.00E-141 | um01816   | 22c00205 | 1.00E-136 |
| BBH | 22d00179 | um01797   | 0         | um01797   | 22d00179 | 0         |
| BBH | 22c00043 | um01510   | 0         | um01510   | 22c00043 | 0         |
| BBH | 22c00216 | um01832   | 1.00E-167 | um01832   | 22c00216 | 1.00E-173 |
| BBH | 22c00236 | um01869   | 0         | um01869   | 22c00236 | 0         |
| BBH | 22c00222 | um10256   | 1.00E-174 | um10256   | 22c00222 | 1.00E-168 |
| BBH | 22d00243 | um10450   | 0         | um10450   | 22d00243 | 0         |
| BBH | 22d00143 | um01732   | 0         | um01732   | 22d00143 | 0         |
| BBH | 22d00283 | um01994   | 0         | um01994   | 22d00283 | 0         |
| BBH | 22d00296 | um02020   | 7.00E-68  | um02020   | 22d00296 | 4.00E-63  |
| BBH | 24c00064 | um06253   | 0         | um06253   | 24c00064 | 0         |
| BBH | 24d00045 | um06234   | 1.00E-112 | um06234   | 24d00045 | 1.00E-114 |
| BBH | 24c00026 | um06189   | 0         | um06189   | 24c00026 | 0         |
| BBH | 24d00026 | um11222   | 0         | um11222   | 24d00026 | 0         |
| BBH | 24d00004 | um11338   | 0         | um11338   | 24d00004 | 0         |
| BBH | 24d00014 | um06169   | 4.00E-64  | um06169   | 24d00014 | 1.00E-67  |
| NNN | 24d00039 | um11233   | 1.00E-22  | um11233   | 24d00040 | 1.00E-101 |
| BBH | 24d00055 | um06257   | 0         | um06257   | 24d00055 | 0         |
| BBH | 24c00055 | um06237   | 0         | um06237   | 24c00055 | 0         |
| BBH | 24d00044 | um06229   | 0         | um06229   | 24d00044 | 0         |
| BBH | 24c00043 | um06219   | 1.00E-104 | um06219   | 24c00043 | 1.00E-100 |
| BBH | 24c00071 | um06261.2 | 0         | um06261.2 | 24c00071 | 0         |
| BBH | 24c00065 | um06256   | 0         | um06256   | 24c00065 | 0         |
| BBH | 24d00030 | um06200   | 1.00E-177 | um06200   | 24d00030 | 0         |
| BBH | 24d00022 | um06190   | 1.00E-140 | um06190   | 24d00022 | 1.00E-129 |
| BBH | 24c00033 | um06201   | 0         | um06201   | 24c00033 | 0         |
| BBH | 24d00006 | um06156   | 0         | um06156   | 24d00006 | 0         |
| BBH | 24d00003 | um11339   | 0         | um11339   | 24d00003 | 0         |
| BBH | 24d00015 | um11218   | 3.00E-36  | um11218   | 24d00015 | 2.00E-30  |
| BBH | 24c00003 | um06155   | 0         | um06155   | 24c00003 | 0         |
| BBH | 24d00054 | um06255   | 1.00E-25  | um06255   | 24d00054 | 7.00E-31  |
| BBH | 24d00041 | um11234.2 | 3.00E-22  | um11234.2 | 24d00041 | 2.00E-14  |
| BBH | 24c00053 | um06235   | 0         | um06235   | 24c00053 | 0         |
| NNN | 24d00009 | um06148   | 1.00E-129 |           |          |           |
| BBH | 24c00016 | um06167   | 1.00E-165 | um06167   | 24c00016 | 1.00E-172 |
| BBH | 24c00042 | um06215   | 0         | um06215   | 24c00042 | 0         |
| NNN | 24c00032 | um06201   | 7.00E-21  | um06201   | 24c00033 | 0         |
| BBH | 24d00047 | um10971   | 3.00E-50  | um10971   | 24d00047 | 1.00E-49  |
| BBH | 24d00028 | um06197   | 3.00E-19  | um06197   | 24d00028 | 5.00E-24  |
| BBH | 24c00009 | um06162   | 1.00E-143 | um06162   | 24c00009 | 1.00E-138 |
| BBH | 24c00011 | um11300   | 6.00E-77  | um11300   | 24c00011 | 2.00E-76  |
| BBH | 24d00012 | um06153   | 0         | um06153   | 24d00012 | 0         |
| BBH | 24d00019 | um06182   | 6.00E-85  | um06182   | 24d00019 | 1.00E-89  |
| BBH | 24d00002 | um01431   | 0         | um01431   | 24d00002 | 0         |
| BBH | 24c00006 | um11296.2 | 0         | um11296.2 | 24c00006 | 0         |
| BBH | 24d00010 | um11298   | 6.00E-61  | um11298   | 24d00010 | 8.00E-69  |
| BBH | 24d00031 | um06210   | 0         | um06210   | 24d00031 | 0         |
| BBH | 24d00020 | um06183   | 1.00E-126 | um06183   | 24d00020 | 1.00E-128 |
| BBH | 24d00011 | um06151   | 9.00E-75  | um06151   | 24d00011 | 7.00E-74  |
| BBH | 24c00054 | um06236   | 1.00E-119 | um06236   | 24c00054 | 1.00E-119 |
| BBH | 24c00027 | um11221   | 0         | um11221   | 24c00027 | 0         |
| BBH | 24d00046 | um10970   | 1.00E-132 | um10970   | 24d00046 | 1.00E-136 |
| BBH | 24d00027 | um11223   | 3.00E-54  | um11223   | 24d00027 | 3.00E-54  |
| BBH | 24c00001 | um01434   | 0         | um01434   | 24c00001 | 0         |
| BBH | 24d00056 | um06258   | 0         | um06258   | 24d00056 | 0         |
| BBH | 24d00032 | um11227   | 2.00E-43  | um11227   | 24d00032 | 1.00E-43  |
| BBH | 24c00031 | um11226   | 1.00E-155 | um11226   | 24c00031 | 1.00E-157 |
| NNN | 24c00041 | um06215   | 7.00E-57  | um06215   | 24c00042 | 0         |
| BBH | 24d00021 | um04833   | 2.00E-58  | um04833   | 24d00021 | 7.00E-55  |
| BBH | 24c00017 | um06168   | 1.00E-168 | um06168   | 24c00017 | 1.00E-159 |
| BBH | 24d00001 | um01433   | 1.00E-111 | um01433   | 24d00001 | 1.00E-107 |

|     |          |           |           |         |          |           |
|-----|----------|-----------|-----------|---------|----------|-----------|
| BBH | 24d00013 | um06164   | 0         | um06164 | 24d00013 | 0         |
| BBH | 24c00073 | um05648   | 1.00E-149 | um05648 | 24c00073 | 1.00E-118 |
| BBH | 24c00004 | um06158   | 0         | um06158 | 24c00004 | 0         |
| BBH | 24d00017 | um06174   | 0         | um06174 | 24d00017 | 0         |
| BBH | 24c00040 | um06213   | 4.00E-76  | um06213 | 24c00040 | 1.00E-75  |
| BBH | 24d00033 | um11228   | 6.00E-70  | um11228 | 24d00033 | 3.00E-65  |
| BBH | 24d00025 | um06194   | 0         | um06194 | 24d00025 | 0         |
| BBH | 24d00049 | um10972   | 2.00E-46  | um10972 | 24d00049 | 1.00E-42  |
| NNN | 24d00061 | um01944   | 0         | um01944 | 22c00279 | 0         |
| NNN | 24d00008 | um12096   | 1.00E-19  | um12096 | 6d00070  | 1.00E-122 |
| BBH | 24d00058 | um06259   | 1.00E-118 | um06259 | 24d00058 | 1.00E-123 |
| NNN | 24c00058 | um03263   | 5.00E-51  | um03263 | 14d00067 | 0         |
| BBH | 24c00012 | um06152   | 1.00E-179 | um06152 | 24c00012 | 0         |
| NNN | 24c00059 | um12330   | 1.00E-101 |         |          |           |
| BBH | 24c00030 | um11224   | 2.00E-61  | um11224 | 24c00030 | 3.00E-59  |
| BBH | 24c00039 | um06212   | 1.00E-103 | um06212 | 24c00039 | 1.00E-111 |
| BBH | 24c00069 | um04305   | 0         | um04305 | 24c00069 | 0         |
| BBH | 24d00042 | um06226   | 1.00E-154 | um06226 | 24d00042 | 1.00E-152 |
| BBH | 24c00023 | um06186   | 9.00E-87  | um06186 | 24c00023 | 8.00E-79  |
| BBH | 24c00025 | um06188   | 0         | um06188 | 24c00025 | 0         |
| BBH | 24c00049 | um15028   | 0         | um15028 | 24c00049 | 0         |
| BBH | 24c00018 | um11217   | 8.00E-33  | um11217 | 24c00018 | 8.00E-33  |
| BBH | 24d00036 | um11231   | 0         | um11231 | 24d00036 | 0         |
| NNN | 24d00007 | um06326   | 9.00E-48  | um06326 | 4d00032  | 1.00E-124 |
| BBH | 24c00052 | um06231   | 1.00E-161 | um06231 | 24c00052 | 1.00E-156 |
| BBH | 24c00013 | um06154   | 7.00E-49  | um06154 | 24c00013 | 1.00E-52  |
| BBH | 24c00070 | um10979   | 0         | um10979 | 24c00070 | 0         |
| BBH | 24c00008 | um11299   | 1.00E-110 | um11299 | 24c00008 | 1.00E-115 |
| BBH | 24c00038 | um06211   | 0         | um06211 | 24c00038 | 0         |
| BBH | 24d00048 | um12329   | 0         | um12329 | 24d00048 | 0         |
| BBH | 24c00048 | um11235   | 5.00E-69  | um11235 | 24c00048 | 2.00E-62  |
| BBH | 24d00018 | um12326   | 1.00E-96  | um12326 | 24d00018 | 2.00E-99  |
| NNN | 24c00047 | um06224   | 0         |         |          |           |
| BBH | 24c00024 | um06187   | 0         | um06187 | 24c00024 | 0         |
| BBH | 24d00029 | um11225   | 0         | um11225 | 24d00029 | 0         |
| BBH | 24c00022 | um06184   | 0         | um06184 | 24c00022 | 0         |
| BBH | 24c00007 | um11297   | 0         | um11297 | 24c00007 | 0         |
| BBH | 24d00053 | um06251   | 0         | um06251 | 24d00053 | 0         |
| BBH | 24c00056 | um06239   | 0         | um06239 | 24c00056 | 0         |
| BBH | 24d00063 | um05647   | 0         | um05647 | 24d00063 | 0         |
| BBH | 24c00014 | um06163   | 5.00E-54  | um06163 | 24c00014 | 1.00E-42  |
| BBH | 24c00072 | um05646   | 0         | um05646 | 24c00072 | 0         |
| BBH | 24d00035 | um11230   | 0         | um11230 | 24d00035 | 0         |
| BBH | 24c00028 | um06195   | 1.00E-131 | um06195 | 24c00028 | 1.00E-137 |
| BBH | 24c00029 | um12327   | 0         | um12327 | 24c00029 | 0         |
| BBH | 24c00050 | um06228   | 0         | um06228 | 24c00050 | 0         |
| BBH | 24d00051 | um06249   | 0         | um06249 | 24d00051 | 0         |
| BBH | 24d00023 | um06191   | 3.00E-43  | um06191 | 24d00023 | 2.00E-35  |
| NNN | 24c00066 | um06260   | 0         |         |          |           |
| NNN | 24c00060 | um10974.2 | 0         |         |          |           |
| BBH | 24c00021 | um06175   | 0         | um06175 | 24c00021 | 0         |
| BBH | 24d00062 | um05645   | 9.00E-50  | um05645 | 24d00062 | 5.00E-50  |
| BBH | 24d00037 | um11232   | 0         | um11232 | 24d00037 | 0         |
| BBH | 24d00040 | um11233   | 1.00E-101 | um11233 | 24d00040 | 1.00E-101 |
| BBH | 24c00037 | um15068   | 2.00E-87  | um15068 | 24c00037 | 3.00E-86  |
| BBH | 24c00015 | um12325   | 2.00E-22  | um12325 | 24c00015 | 2.00E-23  |
| BBH | 24d00052 | um10976   | 0         | um10976 | 24d00052 | 0         |
| BBH | 24d00059 | um03627   | 1.00E-133 | um03627 | 24d00059 | 1.00E-133 |
| BBH | 24c00051 | um10968   | 0         | um10968 | 24c00051 | 0         |
| BBH | 24c00035 | um06205   | 0         | um06205 | 24c00035 | 0         |
| BBH | 24d00050 | um10973   | 0         | um10973 | 24d00050 | 0         |
| BBH | 24c00002 | um01432   | 0         | um01432 | 24c00002 | 0         |



|     |          |           |           |           |          |           |
|-----|----------|-----------|-----------|-----------|----------|-----------|
| BBH | 24c00005 | um06159   | 0         | um06159   | 24c00005 | 0         |
| BBH | 24c00020 | um11220   | 0         | um11220   | 24c00020 | 0         |
| BBH | 24c00061 | um10975.2 | 1.00E-167 | um10975.2 | 24c00061 | 1.00E-167 |
| BBH | 24c00068 | um02028   | 0         | um02028   | 24c00068 | 0         |
| BBH | 24c00067 | um03626   | 8.00E-77  | um03626   | 24c00067 | 8.00E-78  |
| BBH | 24d00024 | um06193   | 2.00E-74  | um06193   | 24d00024 | 6.00E-77  |
| BBH | 24d00038 | um06218   | 1.00E-96  | um06218   | 24d00038 | 1.00E-98  |
| BBH | 24c00036 | um06206   | 6.00E-88  | um06206   | 24c00036 | 1.00E-100 |
| BBH | 24d00016 | um11219   | 1.00E-128 | um11219   | 24d00016 | 1.00E-118 |
| BBH | 25d00005 | um05629   | 1.00E-159 | um05629   | 25d00005 | 1.00E-177 |
| BBH | 25c00056 | um05729   | 3.00E-87  | um05729   | 25c00056 | 8.00E-80  |
| BBH | 25d00085 | um05776   | 0         | um05776   | 25d00085 | 0         |
| BBH | 25d00011 | um05625   | 1.00E-46  | um05625   | 25d00011 | 2.00E-46  |
| NNN | 25c00082 | um05785   | 1.00E-175 |           |          |           |
| BBH | 25c00067 | um05753   | 0         | um05753   | 25c00067 | 0         |
| BBH | 25d00018 | um05654   | 2.00E-83  | um05654   | 25d00018 | 4.00E-95  |
| BBH | 25c00043 | um10735   | 0         | um10735   | 25c00043 | 0         |
| NNN | 25c00003 | um00113   | 1.00E-161 | um00113   | 9d00061  | 0         |
| BBH | 25d00032 | um10742   | 7.00E-33  | um10742   | 25d00032 | 6.00E-33  |
| BBH | 25c00040 | um05677   | 1.00E-127 | um05677   | 25c00040 | 1.00E-134 |
| BBH | 25c00079 | um05789   | 1.00E-67  | um05789   | 25c00079 | 3.00E-62  |
| BBH | 25d00064 | um05737   | 1.00E-136 | um05737   | 25d00064 | 1.00E-138 |
| BBH | 25d00054 | um05720   | 1.00E-141 | um05720   | 25d00054 | 1.00E-140 |
| BBH | 25c00024 | um10938   | 1.00E-112 | um10938   | 25c00024 | 1.00E-117 |
| BBH | 25d00053 | um05656   | 0         | um05656   | 25d00053 | 0         |
| NNN | 25d00006 | um12019   | 0         |           |          |           |
| BBH | 25d00012 | um05640   | 1.00E-100 | um05640   | 25d00012 | 3.00E-96  |
| BBH | 25c00042 | um05674   | 1.00E-133 | um05674   | 25c00042 | 1.00E-134 |
| BBH | 25c00012 | um10718.2 | 0         | um10718.2 | 25c00012 | 0         |
| BBH | 25c00076 | um05769   | 1.00E-160 | um05769   | 25c00076 | 1.00E-161 |
| BBH | 25d00031 | um15084   | 3.00E-69  | um15084   | 25d00031 | 3.00E-70  |
| BBH | 25d00043 | um05676   | 0         | um05676   | 25d00043 | 1.00E-179 |
| NNN | 25c00002 | um01881   | 2.00E-77  | um01881   | 22c00242 | 1.00E-157 |
| BBH | 25c00083 | um11584   | 1.00E-103 | um11584   | 25c00083 | 1.00E-107 |
| BBH | 25d00065 | um05739   | 0         | um05739   | 25d00065 | 0         |
| BBH | 25d00075 | um05761   | 2.00E-61  | um05761   | 25d00075 | 1.00E-59  |
| BBH | 25d00015 | um05632   | 1.00E-92  | um05632   | 25d00015 | 2.00E-89  |
| BBH | 25c00039 | um05678   | 1.00E-90  | um05678   | 25c00039 | 1.00E-90  |
| BBH | 25d00029 | um05719.2 | 1.00E-100 | um05719.2 | 25d00029 | 1.00E-121 |
| NNN | 25d00022 | um05709   | 1.00E-161 |           |          |           |
| BBH | 25c00051 | um05659   | 0         | um05659   | 25c00051 | 0         |
| BBH | 25c00045 | um10729   | 2.00E-82  | um10729   | 25c00045 | 5.00E-82  |
| BBH | 25d00076 | um05766   | 1.00E-147 | um05766   | 25d00076 | 1.00E-147 |
| BBH | 25d00003 | um05626   | 1.00E-74  | um05626   | 25d00003 | 1.00E-74  |
| BBH | 25c00005 | um12018   | 7.00E-27  | um12018   | 25c00005 | 3.00E-22  |
| BBH | 25c00010 | um05641   | 0         | um05641   | 25c00010 | 1.00E-174 |
| BBH | 25c00064 | um05745   | 0         | um05745   | 25c00064 | 0         |
| BBH | 25d00046 | um10731   | 2.00E-62  | um10731   | 25d00046 | 1.00E-68  |
| NNN | 25c00053 | um05724   | 4.00E-11  |           |          |           |
| BBH | 25c00023 | um05714   | 0         | um05714   | 25c00023 | 0         |
| BBH | 25c00021 | um15022.2 | 6.00E-68  | um15022.2 | 25c00021 | 1.00E-67  |
| BBH | 25d00037 | um05690   | 0         | um05690   | 25d00037 | 0         |
| BBH | 25d00061 | um05728   | 2.00E-65  | um05728   | 25d00061 | 4.00E-74  |
| BBH | 25c00073 | um12024   | 9.00E-25  | um12024   | 25c00073 | 8.00E-25  |
| BBH | 25c00038 | um05680   | 0         | um05680   | 25c00038 | 0         |
| BBH | 25d00060 | um05726   | 0         | um05726   | 25d00060 | 0         |
| BBH | 25c00028 | um05700   | 1.00E-158 | um05700   | 25c00028 | 1.00E-160 |
| BBH | 25d00059 | um15023   | 0         | um15023   | 25d00059 | 0         |
| BBH | 25d00058 | um05725   | 1.00E-104 | um05725   | 25d00058 | 1.00E-104 |
| BBH | 25c00058 | um05734   | 1.00E-110 | um05734   | 25c00058 | 1.00E-110 |
| BBH | 25c00031 | um05693   | 2.00E-86  | um05693   | 25c00031 | 1.00E-101 |
| BBH | 25c00037 | um12312   | 1.00E-124 | um12312   | 25c00037 | 1.00E-126 |

|     |          |           |           |           |          |           |
|-----|----------|-----------|-----------|-----------|----------|-----------|
| BBH | 25c00044 | um10732   | 1.00E-149 | um10732   | 25c00044 | 1.00E-149 |
| BBH | 25c00011 | um10719   | 1.00E-132 | um10719   | 25c00011 | 1.00E-135 |
| BBH | 25c00004 | um05628.2 | 8.00E-57  | um05628.2 | 25c00004 | 3.00E-57  |
| BBH | 25c00018 | um05653.2 | 4.00E-96  | um05653.2 | 25c00018 | 4.00E-79  |
| NNN | 25d00004 | um05627   | 1.00E-137 |           |          |           |
| NNN | 25d00017 | um05652   | 1.00E-136 |           |          |           |
| BBH | 25c00022 | um10935   | 0         | um10935   | 25c00022 | 0         |
| BBH | 25c00020 | um05704   | 1.00E-127 | um05704   | 25c00020 | 1.00E-134 |
| BBH | 25d00077 | um05767   | 0         | um05767   | 25d00077 | 0         |
| BBH | 25c00065 | um10918   | 4.00E-22  | um10918   | 25c00065 | 4.00E-22  |
| BBH | 25c00052 | um05721   | 0         | um05721   | 25c00052 | 1.00E-119 |
| BBH | 25c00050 | um05660   | 0         | um05660   | 25c00050 | 0         |
| BBH | 25d00086 | um05777   | 0         | um05777   | 25d00086 | 0         |
| BBH | 25d00070 | um05747   | 0         | um05747   | 25d00070 | 0         |
| BBH | 25d00051 | um05658   | 1.00E-110 | um05658   | 25d00051 | 1.00E-124 |
| BBH | 25d00027 | um10939   | 2.00E-79  | um10939   | 25d00027 | 3.00E-76  |
| BBH | 25d00057 | um10941   | 1.00E-143 | um10941   | 25d00057 | 1.00E-146 |
| BBH | 25d00020 | um05706   | 0         | um05706   | 25d00020 | 0         |
| BBH | 25d00067 | um05742   | 4.00E-77  | um05742   | 25d00067 | 3.00E-77  |
| BBH | 25c00030 | um05695   | 0         | um05695   | 25c00030 | 0         |
| BBH | 25d00045 | um05671   | 0         | um05671   | 25d00045 | 0         |
| BBH | 25c00078 | um05790   | 0         | um05790   | 25c00078 | 0         |
| BBH | 25d00069 | um05746   | 1.00E-158 | um05746   | 25d00069 | 1.00E-163 |
| BBH | 25c00061 | um05740   | 0         | um05740   | 25c00061 | 0         |
| BBH | 25d00035 | um10740   | 3.00E-44  | um10740   | 25d00035 | 2.00E-44  |
| BBH | 25d00030 | um05702   | 1.00E-141 | um05702   | 25d00030 | 1.00E-149 |
| BBH | 25d00050 | um10726   | 1.00E-55  | um10726   | 25d00050 | 3.00E-56  |
| BBH | 25c00036 | um05683   | 7.00E-92  | um05683   | 25c00036 | 8.00E-92  |
| BBH | 25d00078 | um05770   | 1.00E-179 | um05770   | 25d00078 | 0         |
| BBH | 25d00040 | um10738   | 1.00E-165 | um10738   | 25d00040 | 1.00E-178 |
| BBH | 25d00009 | um10721   | 1.00E-180 | um10721   | 25d00009 | 1.00E-170 |
| BBH | 25d00025 | um10937   | 0         | um10937   | 25d00025 | 1.00E-176 |
| BBH | 25d00019 | um05705   | 2.00E-51  | um05705   | 25d00019 | 5.00E-47  |
| NNN | 25c00015 | um02704   | 2.00E-44  | um02704   | 5d00046  | 0         |
| BBH | 25d00036 | um05692   | 0         | um05692   | 25d00036 | 0         |
| NNN | 25d00028 | um05718   | 0         |           |          |           |
| BBH | 25c00026 | um10940   | 1.00E-86  | um10940   | 25c00026 | 7.00E-84  |
| BBH | 25c00047 | um05665   | 1.00E-162 | um05665   | 25c00047 | 1.00E-162 |
| NNN | 25c00087 | um03407   | 2.00E-30  | um03407   | 8d00115  | 0         |
| BBH | 25d00047 | um10730   | 0         | um10730   | 25d00047 | 0         |
| BBH | 25d00068 | um10917   | 7.00E-21  | um10917   | 25d00068 | 2.00E-21  |
| BBH | 25c00062 | um10915   | 0         | um10915   | 25c00062 | 0         |
| BBH | 25c00007 | um05649   | 0         | um05649   | 25c00007 | 0         |
| BBH | 25d00038 | um05689   | 1.00E-146 | um05689   | 25d00038 | 1.00E-153 |
| NNN | 25d00088 | um02062   | 2.00E-64  | um02062   | 6c00122  | 0         |
| NNN | 25c00060 | um05644   | 0         | um05644   | 15d00078 | 3.00E-22  |
| BBH | 25d00081 | um11586   | 6.00E-24  | um11586   | 25d00081 | 2.00E-30  |
| BBH | 25d00056 | um05722   | 0         | um05722   | 25d00056 | 0         |
| BBH | 25c00035 | um05684   | 2.00E-59  | um05684   | 25c00035 | 1.00E-72  |
| BBH | 25d00071 | um05748   | 5.00E-84  | um05748   | 25d00071 | 5.00E-89  |
| NNN | 25d00095 | um01943   | 4.00E-18  | um01943   | 22c00278 | 0         |
| BBH | 25d00013 | um10720   | 0         | um10720   | 25d00013 | 0         |
| BBH | 25c00084 | um11583   | 2.00E-59  | um11583   | 25c00084 | 3.00E-52  |
| BBH | 25c00063 | um10916   | 1.00E-164 | um10916   | 25c00063 | 1.00E-173 |
| BBH | 25c00055 | um10914   | 1.00E-106 | um10914   | 25c00055 | 1.00E-107 |
| BBH | 25d00062 | um05731   | 2.00E-52  | um05731   | 25d00062 | 4.00E-51  |
| BBH | 25c00029 | um05694   | 8.00E-15  | um05694   | 25c00029 | 8.00E-15  |
| BBH | 25d00048 | um10727   | 0         | um10727   | 25d00048 | 0         |
| BBH | 25c00034 | um05686   | 4.00E-36  | um05686   | 25c00034 | 9.00E-37  |
| NNN | 25d00072 | um05755.2 | 0         |           |          |           |
| NNN | 25d00080 | um10070   | 5.00E-37  | um10070   | 6c00051  | 0         |
| BBH | 25c00006 | um05631.2 | 0         | um05631.2 | 25c00006 | 0         |

|     |          |           |           |           |          |           |
|-----|----------|-----------|-----------|-----------|----------|-----------|
| NNN | 25d00091 | um06076   | 7.00E-28  | um06076   | 20c00037 | 0         |
| BBH | 25c00017 | um10724   | 1.00E-57  | um10724   | 25c00017 | 3.00E-58  |
| BBH | 25c00072 | um05760   | 4.00E-57  | um05760   | 25c00072 | 1.00E-58  |
| BBH | 25d00063 | um05736   | 0         | um05736   | 25d00063 | 0         |
| BBH | 25d00016 | um05651   | 0         | um05651   | 25d00016 | 0         |
| BBH | 25d00042 | um05679   | 1.00E-108 | um05679   | 25d00042 | 2.00E-98  |
| BBH | 25d00083 | um05781.2 | 4.00E-35  | um05781.2 | 25d00083 | 2.00E-35  |
| BBH | 25d00039 | um05687   | 1.00E-123 | um05687   | 25d00039 | 1.00E-137 |
| BBH | 25d00026 | um05715   | 0         | um05715   | 25d00026 | 0         |
| NNN | 25c00013 | um05636   | 1.00E-105 |           |          |           |
| BBH | 25c00074 | um05764   | 1.00E-104 | um05764   | 25c00074 | 1.00E-103 |
| BBH | 25d00034 | um10741   | 3.00E-53  | um10741   | 25d00034 | 6.00E-59  |
| BBH | 25c00054 | um10913   | 0         | um10913   | 25c00054 | 0         |
| BBH | 25c00033 | um05688   | 1.00E-100 | um05688   | 25c00033 | 1.00E-111 |
| BBH | 25d00073 | um05758   | 0         | um05758   | 25d00073 | 0         |
| BBH | 25c00085 | um05774   | 3.00E-95  | um05774   | 25c00085 | 5.00E-85  |
| BBH | 25c00049 | um05663   | 1.00E-58  | um05663   | 25c00049 | 1.00E-58  |
| BBH | 25c00009 | um12017   | 1.00E-131 | um12017   | 25c00009 | 1.00E-128 |
| BBH | 25c00080 | um05787   | 1.00E-133 | um05787   | 25c00080 | 1.00E-138 |
| BBH | 25c00077 | um05771   | 0         | um05771   | 25c00077 | 0         |
| NNN | 25c00068 | um05754   | 1.00E-149 |           |          |           |
| BBH | 25d00007 | um10723   | 4.00E-58  | um10723   | 25d00007 | 2.00E-64  |
| BBH | 25c00070 | um12021   | 7.00E-99  | um12021   | 25c00070 | 8.00E-99  |
| BBH | 25d00023 | um10934   | 0         | um10934   | 25d00023 | 0         |
| BBH | 25c00066 | um05749   | 0         | um05749   | 25c00066 | 0         |
| BBH | 25d00049 | um05662   | 1.00E-157 | um05662   | 25d00049 | 1.00E-157 |
| BBH | 25c00075 | um11581   | 5.00E-48  | um11581   | 25c00075 | 1.00E-47  |
| BBH | 25d00041 | um10737   | 0         | um10737   | 25d00041 | 0         |
| BBH | 25c00057 | um05732   | 0         | um05732   | 25c00057 | 0         |
| NNN | 25d00093 | um05972   | 1.00E-137 | um05972   | 6c00005  | 0         |
| BBH | 25c00008 | um05624   | 1.00E-129 | um05624   | 25c00008 | 1.00E-128 |
| BBH | 25c00071 | um12023   | 1.00E-138 | um12023   | 25c00071 | 1.00E-141 |
| BBH | 25d00044 | um10733   | 1.00E-72  | um10733   | 25d00044 | 2.00E-74  |
| BBH | 25c00081 | um05786.2 | 1.00E-114 | um05786.2 | 25c00081 | 1.00E-113 |
| NNN | 25d00089 | um04886   | 5.00E-22  | um04886   | 26d00001 | 0         |
| BBH | 25d00024 | um10936   | 2.00E-13  | um10936   | 25d00024 | 1.00E-15  |
| NNN | 25c00032 | um05691   | 9.00E-13  |           |          |           |
| BBH | 25c00041 | um05675   | 1.00E-111 | um05675   | 25c00041 | 1.00E-110 |
| BBH | 25d00033 | um05698   | 0         | um05698   | 25d00033 | 0         |
| BBH | 25c00069 | um05756.2 | 0         | um05756.2 | 25c00069 | 0         |
| NNN | 25c00048 | um01980   | 7.00E-36  | um01980   | 22d00275 | 0         |
| BBH | 25c00014 | um05635   | 4.00E-91  | um05635   | 25c00014 | 5.00E-90  |
| BBH | 25d00008 | um10722   | 0         | um10722   | 25d00008 | 0         |
| BBH | 25d00074 | um12022   | 1.00E-23  | um12022   | 25d00074 | 4.00E-29  |
| BBH | 25c00027 | um05703   | 1.00E-150 | um05703   | 25c00027 | 1.00E-155 |
| NNN | 25d00001 | um02021   | 7.00E-65  | um02021   | 22c00321 | 1.00E-137 |
| BBH | 25d00082 | um11585   | 0         | um11585   | 25d00082 | 0         |
| BBH | 25d00010 | um05642   | 0         | um05642   | 25d00010 | 0         |
| NNN | 26d00046 | um04802   | 5.00E-68  |           |          |           |
| BBH | 26d00102 | um10608   | 0         | um10608   | 26d00102 | 0         |
| BBH | 26c00026 | um10703   | 0         | um10703   | 26c00026 | 0         |
| BBH | 26d00079 | um04724   | 0         | um04724   | 26d00079 | 0         |
| BBH | 26d00021 | um04850   | 1.00E-132 | um04850   | 26d00021 | 1.00E-134 |
| BBH | 26d00078 | um04726   | 1.00E-149 | um04726   | 26d00078 | 1.00E-157 |
| BBH | 26d00097 | um10582.2 | 1.00E-157 | um10582.2 | 26d00097 | 1.00E-158 |
| NNN | 26d00028 | um12282   | 1.00E-29  | um12282   | 26d00029 | 2.00E-89  |
| BBH | 26c00056 | um10688   | 0         | um10688   | 26c00056 | 0         |
| BBH | 26c00044 | um04806   | 0         | um04806   | 26c00044 | 0         |
| BBH | 26d00016 | um04855   | 4.00E-34  | um04855   | 26d00016 | 1.00E-34  |
| BBH | 26c00070 | um04753   | 0         | um04753   | 26c00070 | 0         |
| BBH | 26d00087 | um04711   | 0         | um04711   | 26d00087 | 0         |
| BBH | 26c00015 | um12285   | 4.00E-98  | um12285   | 26c00015 | 1.00E-105 |

|     |          |           |           |           |          |           |
|-----|----------|-----------|-----------|-----------|----------|-----------|
| BBH | 26d00086 | um04713   | 1.00E-138 | um04713   | 26d00086 | 1.00E-138 |
| BBH | 26d00058 | um04773   | 0         | um04773   | 26d00058 | 0         |
| BBH | 26d00066 | um04758   | 0         | um04758   | 26d00066 | 0         |
| BBH | 26c00067 | um11998   | 0         | um11998   | 26c00067 | 0         |
| BBH | 26c00001 | um04885   | 0         | um04885   | 26c00001 | 0         |
| NNN | 26c00049 | um04800   | 1.00E-86  |           |          |           |
| BBH | 26d00045 | um04807   | 1.00E-97  | um04807   | 26d00045 | 1.00E-109 |
| BBH | 26d00003 | um12006   | 1.00E-108 | um12006   | 26d00003 | 1.00E-108 |
| BBH | 26d00022 | um04848   | 0         | um04848   | 26d00022 | 0         |
| BBH | 26d00077 | um04733   | 2.00E-72  | um04733   | 26d00077 | 5.00E-80  |
| BBH | 26d00051 | um04789   | 1.00E-129 | um04789   | 26d00051 | 1.00E-127 |
| BBH | 26c00079 | um04734   | 0         | um04734   | 26c00079 | 0         |
| BBH | 26d00020 | um04851   | 7.00E-36  | um04851   | 26d00020 | 7.00E-31  |
| BBH | 26d00001 | um04886   | 0         | um04886   | 26d00001 | 0         |
| BBH | 26c00043 | um04808   | 0         | um04808   | 26c00043 | 0         |
| BBH | 26c00025 | um04844   | 1.00E-88  | um04844   | 26c00025 | 2.00E-91  |
| BBH | 26c00024 | um04847   | 2.00E-50  | um04847   | 26c00024 | 7.00E-57  |
| BBH | 26d00015 | um04856   | 1.00E-106 | um04856   | 26d00015 | 1.00E-104 |
| BBH | 26c00016 | um04860   | 1.00E-146 | um04860   | 26c00016 | 1.00E-146 |
| BBH | 26d00080 | um04722   | 2.00E-66  | um04722   | 26d00080 | 2.00E-66  |
| BBH | 26c00089 | um04712   | 0         | um04712   | 26c00089 | 0         |
| BBH | 26c00055 | um04791   | 0         | um04791   | 26c00055 | 0         |
| BBH | 26d00060 | um04778   | 2.00E-94  | um04778   | 26d00060 | 7.00E-96  |
| BBH | 26d00095 | um04702   | 8.00E-88  | um04702   | 26d00095 | 9.00E-88  |
| BBH | 26c00068 | um11997   | 0         | um11997   | 26c00068 | 0         |
| BBH | 26d00065 | um11999   | 0         | um11999   | 26d00065 | 0         |
| BBH | 26d00044 | um04809   | 1.00E-101 | um04809   | 26d00044 | 1.00E-104 |
| BBH | 26d00096 | um04701   | 1.00E-119 | um04701   | 26d00096 | 1.00E-116 |
| BBH | 26d00038 | um10698   | 6.00E-15  | um10698   | 26d00038 | 3.00E-16  |
| BBH | 26d00004 | um04881   | 0         | um04881   | 26d00004 | 0         |
| BBH | 26d00094 | um04703   | 1.00E-132 | um04703   | 26d00094 | 1.00E-132 |
| BBH | 26d00032 | um04830   | 1.00E-117 | um04830   | 26d00032 | 1.00E-123 |
| BBH | 26c00072 | um04749   | 0         | um04749   | 26c00072 | 0         |
| BBH | 26c00023 | um04849   | 7.00E-21  | um04849   | 26c00023 | 3.00E-22  |
| BBH | 26c00017 | um04859   | 0         | um04859   | 26c00017 | 0         |
| BBH | 26c00058 | um10687   | 1.00E-104 | um10687   | 26c00058 | 1.00E-104 |
| BBH | 26d00069 | um10683   | 0         | um10683   | 26d00069 | 0         |
| BBH | 26c00050 | um04797   | 1.00E-154 | um04797   | 26c00050 | 1.00E-159 |
| BBH | 26d00072 | um10682   | 0         | um10682   | 26d00072 | 0         |
| BBH | 26c00078 | um04732   | 0         | um04732   | 26c00078 | 0         |
| BBH | 26d00048 | um04798   | 9.00E-62  | um04798   | 26d00048 | 1.00E-63  |
| BBH | 26c00094 | um12015   | 8.00E-21  | um12015   | 26c00094 | 8.00E-21  |
| BBH | 26c00008 | um10858   | 8.00E-66  | um10858   | 26c00008 | 8.00E-66  |
| BBH | 26c00069 | um04755   | 0         | um04755   | 26c00069 | 0         |
| BBH | 26c00096 | um02808   | 0         | um02808   | 26c00096 | 0         |
| BBH | 26d00088 | um10673   | 1.00E-145 | um10673   | 26d00088 | 1.00E-145 |
| BBH | 26d00006 | um04878   | 0         | um04878   | 26d00006 | 0         |
| BBH | 26d00084 | um04716   | 0         | um04716   | 26d00084 | 1.00E-168 |
| BBH | 26d00017 | um10852   | 0         | um10852   | 26d00017 | 0         |
| BBH | 26c00075 | um04740   | 1.00E-108 | um04740   | 26c00075 | 1.00E-114 |
| BBH | 26d00068 | um10684   | 1.00E-128 | um10684   | 26d00068 | 1.00E-131 |
| BBH | 26c00018 | um10854   | 0         | um10854   | 26c00018 | 0         |
| BBH | 26c00010 | um04872   | 0         | um04872   | 26c00010 | 0         |
| BBH | 26d00067 | um15017   | 0         | um15017   | 26d00067 | 0         |
| BBH | 26d00047 | um04799   | 8.00E-11  | um04799   | 26d00047 | 2.00E-15  |
| NNN | 26d00031 | um04833   | 0         | um04833   | 24d00021 | 7.00E-55  |
| BBH | 26d00101 | um02807   | 0         | um02807   | 26d00101 | 1.00E-176 |
| NNN | 26d00071 | um06336   | 2.00E-42  | um06336   | 4c00036  | 1.00E-154 |
| BBH | 26c00031 | um10701   | 2.00E-24  | um10701   | 26c00031 | 4.00E-25  |
| BBH | 26c00077 | um10680   | 0         | um10680   | 26c00077 | 0         |
| NNN | 26c00046 | um10691.2 | 0         | um10691.2 | 7c00326  | 4.00E-20  |
| BBH | 26d00027 | um10702   | 8.00E-97  | um10702   | 26d00027 | 8.00E-97  |

|     |          |           |           |           |          |           |
|-----|----------|-----------|-----------|-----------|----------|-----------|
| BBH | 26c00039 | um04813.2 | 0         | um04813.2 | 26c00039 | 0         |
| BBH | 26d00029 | um12282   | 7.00E-96  | um12282   | 26d00029 | 2.00E-89  |
| BBH | 26d00085 | um04714   | 3.00E-65  | um04714   | 26d00085 | 1.00E-66  |
| BBH | 26c00091 | um04707   | 1.00E-139 | um04707   | 26c00091 | 1.00E-144 |
| BBH | 26c00061 | um04775   | 1.00E-66  | um04775   | 26c00061 | 4.00E-69  |
| NNN | 26c00040 | um04812   | 0         |           |          |           |
| BBH | 26c00057 | um04786   | 0         | um04786   | 26c00057 | 0         |
| BBH | 26c00082 | um10678   | 0         | um10678   | 26c00082 | 0         |
| BBH | 26d00089 | um10672.2 | 3.00E-31  | um10672.2 | 26d00089 | 3.00E-44  |
| BBH | 26d00054 | um10686   | 1.00E-123 | um10686   | 26d00054 | 1.00E-135 |
| BBH | 26c00063 | um04770   | 2.00E-15  | um04770   | 26c00063 | 8.00E-18  |
| BBH | 26d00008 | um04873   | 0         | um04873   | 26d00008 | 0         |
| BBH | 26d00092 | um04705   | 0         | um04705   | 26d00092 | 0         |
| BBH | 26d00062 | um12002   | 1.00E-126 | um12002   | 26d00062 | 1.00E-126 |
| BBH | 26c00098 | um02762   | 1.00E-110 | um02762   | 26c00098 | 1.00E-115 |
| BBH | 26d00055 | um04781   | 2.00E-44  | um04781   | 26d00055 | 2.00E-44  |
| BBH | 26c00045 | um04805   | 5.00E-72  | um04805   | 26c00045 | 2.00E-65  |
| BBH | 26c00022 | um10849   | 5.00E-79  | um10849   | 26c00022 | 8.00E-82  |
| BBH | 26c00052 | um04795   | 0         | um04795   | 26c00052 | 0         |
| BBH | 26d00025 | um10704   | 1.00E-110 | um10704   | 26d00025 | 1.00E-109 |
| BBH | 26c00036 | um04819   | 0         | um04819   | 26c00036 | 0         |
| BBH | 26d00074 | um04739   | 1.00E-114 | um04739   | 26d00074 | 1.00E-111 |
| BBH | 26c00048 | um04801.2 | 1.00E-104 | um04801.2 | 26c00048 | 1.00E-104 |
| BBH | 26d00019 | um04852   | 9.00E-93  | um04852   | 26d00019 | 1.00E-173 |
| BBH | 26d00093 | um04704   | 0         | um04704   | 26d00093 | 0         |
| BBH | 26d00041 | um04818   | 1.00E-135 | um04818   | 26d00041 | 1.00E-144 |
| BBH | 26d00075 | um04737   | 1.00E-88  | um04737   | 26d00075 | 4.00E-78  |
| BBH | 26c00074 | um04744   | 1.00E-118 | um04744   | 26c00074 | 1.00E-126 |
| BBH | 26c00097 | um10609   | 1.00E-100 | um10609   | 26c00097 | 3.00E-99  |
| BBH | 26d00070 | um04752   | 0         | um04752   | 26d00070 | 0         |
| BBH | 26c00081 | um04727   | 0         | um04727   | 26c00081 | 0         |
| BBH | 26d00010 | um12286   | 0         | um12286   | 26d00010 | 0         |
| BBH | 26c00011 | um04871   | 0         | um04871   | 26c00011 | 0         |
| BBH | 26d00012 | um04863   | 3.00E-77  | um04863   | 26d00012 | 2.00E-71  |
| BBH | 26d00061 | um04771   | 0         | um04771   | 26d00061 | 0         |
| BBH | 26c00012 | um04869   | 0         | um04869   | 26c00012 | 0         |
| BBH | 26c00086 | um10675   | 3.00E-81  | um10675   | 26c00086 | 3.00E-79  |
| BBH | 26c00071 | um04751   | 1.00E-104 | um04751   | 26c00071 | 1.00E-111 |
| BBH | 26c00006 | um12007   | 0         | um12007   | 26c00006 | 0         |
| BBH | 26c00064 | um04768   | 0         | um04768   | 26c00064 | 0         |
| BBH | 26c00093 | um04700   | 6.00E-92  | um04700   | 26c00093 | 4.00E-86  |
| BBH | 26c00059 | um04782   | 0         | um04782   | 26c00059 | 0         |
| NNN | 26c00021 | um10496   | 1.00E-45  | um10496   | 10c00067 | 1.00E-159 |
| BBH | 26c00095 | um04696   | 5.00E-95  | um04696   | 26c00095 | 2.00E-99  |
| BBH | 26d00073 | um04743   | 0         | um04743   | 26d00073 | 0         |
| BBH | 26d00026 | um01136   | 0         | um01136   | 26d00026 | 0         |
| BBH | 26c00051 | um04796   | 0         | um04796   | 26c00051 | 0         |
| BBH | 26c00076 | um04738   | 0         | um04738   | 26c00076 | 0         |
| BBH | 26c00033 | um04826   | 0         | um04826   | 26c00033 | 0         |
| BBH | 26c00084 | um04721   | 5.00E-95  | um04721   | 26c00084 | 1.00E-114 |
| BBH | 26c00047 | um10690   | 4.00E-18  | um10690   | 26c00047 | 1.00E-22  |
| BBH | 26d00005 | um04880   | 0         | um04880   | 26d00005 | 0         |
| BBH | 26c00007 | um12005   | 1.00E-147 | um12005   | 26c00007 | 1.00E-147 |
| BBH | 26d00011 | um10855   | 0         | um10855   | 26d00011 | 0         |
| BBH | 26d00033 | um10700   | 6.00E-38  | um10700   | 26d00033 | 6.00E-38  |
| BBH | 26c00020 | um10851   | 2.00E-88  | um10851   | 26c00020 | 2.00E-81  |
| BBH | 26c00060 | um04779   | 0         | um04779   | 26c00060 | 0         |
| BBH | 26d00081 | um04720   | 3.00E-33  | um04720   | 26d00081 | 7.00E-37  |
| BBH | 26c00090 | um12280   | 6.00E-50  | um12280   | 26c00090 | 6.00E-50  |
| NNN | 26d00090 | um10671   | 1.00E-148 |           |          |           |
| BBH | 26c00065 | um04764   | 0         | um04764   | 26c00065 | 0         |
| BBH | 26d00009 | um04870   | 1.00E-90  | um04870   | 26d00009 | 6.00E-98  |

|     |          |           |           |           |          |           |
|-----|----------|-----------|-----------|-----------|----------|-----------|
| BBH | 26d00059 | um12004   | 1.00E-132 | um12004   | 26d00059 | 1.00E-121 |
| BBH | 26c00037 | um04817   | 0         | um04817   | 26c00037 | 0         |
| BBH | 26d00064 | um04765   | 1.00E-146 | um04765   | 26d00064 | 1.00E-144 |
| BBH | 26c00013 | um10856   | 0         | um10856   | 26c00013 | 0         |
| BBH | 26c00029 | um04832   | 1.00E-96  | um04832   | 26c00029 | 1.00E-114 |
| BBH | 26c00088 | um04715   | 3.00E-85  | um04715   | 26c00088 | 3.00E-87  |
| BBH | 26d00014 | um12283   | 1.00E-33  | um12283   | 26d00014 | 9.00E-23  |
| BBH | 26d00037 | um10699   | 0         | um10699   | 26d00037 | 0         |
| BBH | 26c00083 | um04723   | 1.00E-101 | um04723   | 26c00083 | 1.00E-104 |
| BBH | 26d00039 | um10695   | 0         | um10695   | 26d00039 | 0         |
| BBH | 26d00052 | um04787   | 0         | um04787   | 26d00052 | 0         |
| BBH | 26c00028 | um04838   | 1.00E-126 | um04838   | 26c00028 | 1.00E-125 |
| BBH | 26d00030 | um04835   | 0         | um04835   | 26d00030 | 0         |
| BBH | 26c00054 | um10689   | 0         | um10689   | 26c00054 | 0         |
| BBH | 26d00040 | um10694   | 1.00E-167 | um10694   | 26d00040 | 0         |
| BBH | 26d00023 | um04846   | 0         | um04846   | 26d00023 | 0         |
| BBH | 26d00099 | um04695   | 0         | um04695   | 26d00099 | 0         |
| BBH | 26d00043 | um04811   | 0         | um04811   | 26d00043 | 0         |
| NNN | 26c00004 | um11514   | 6.00E-64  | um11514   | 13d00001 | 0         |
| BBH | 26d00082 | um10676   | 9.00E-91  | um10676   | 26d00082 | 2.00E-95  |
| BBH | 26c00066 | um04761   | 1.00E-102 | um04761   | 26c00066 | 1.00E-102 |
| BBH | 26d00053 | um04785   | 1.00E-142 | um04785   | 26d00053 | 1.00E-147 |
| BBH | 26d00050 | um04793   | 0         | um04793   | 26d00050 | 0         |
| BBH | 26d00063 | um04767   | 2.00E-43  | um04767   | 26d00063 | 2.00E-43  |
| BBH | 26d00049 | um04794   | 0         | um04794   | 26d00049 | 0         |
| BBH | 26c00038 | um04816   | 1.00E-101 | um04816   | 26c00038 | 1.00E-101 |
| BBH | 26c00030 | um04831   | 2.00E-67  | um04831   | 26c00030 | 4.00E-74  |
| BBH | 26d00007 | um04875   | 1.00E-129 | um04875   | 26d00007 | 1.00E-129 |
| BBH | 26d00013 | um12284   | 9.00E-61  | um12284   | 26d00013 | 2.00E-59  |
| BBH | 26d00036 | um04827   | 0         | um04827   | 26d00036 | 0         |
| BBH | 26c00087 | um10674   | 4.00E-52  | um10674   | 26c00087 | 4.00E-53  |
| BBH | 26d00098 | um10581   | 1.00E-162 | um10581   | 26d00098 | 1.00E-157 |
| BBH | 26d00042 | um10693   | 2.00E-35  | um10693   | 26d00042 | 1.00E-30  |
| BBH | 26c00073 | um04748   | 3.00E-41  | um04748   | 26c00073 | 1.00E-38  |
| BBH | 26d00024 | um04845   | 0         | um04845   | 26d00024 | 0         |
| BBH | 26c00035 | um04820   | 1.00E-176 | um04820   | 26c00035 | 1.00E-178 |
| BBH | 26c00014 | um04865   | 2.00E-62  | um04865   | 26c00014 | 3.00E-63  |
| BBH | 26d00076 | um04736   | 4.00E-53  | um04736   | 26d00076 | 8.00E-53  |
| BBH | 26c00027 | um04840   | 0         | um04840   | 26c00027 | 0         |
| BBH | 27d00080 | um11545   | 2.00E-28  | um11545   | 27d00080 | 8.00E-47  |
| BBH | 27d00095 | um04683   | 0         | um04683   | 27d00095 | 0         |
| BBH | 27c00098 | um04672   | 1.00E-112 | um04672   | 27c00098 | 1.00E-104 |
| BBH | 27c00084 | um04654   | 1.00E-66  | um04654   | 27c00084 | 1.00E-91  |
| BBH | 27d00077 | um04641   | 0         | um04641   | 27d00077 | 0         |
| BBH | 27d00016 | um11754   | 3.00E-28  | um11754   | 27d00016 | 5.00E-17  |
| NNN | 27c00053 | um15015   | 0         |           |          |           |
| BBH | 27d00032 | um15014   | 0         | um15014   | 27d00032 | 0         |
| NNN | 27c00028 | um02562   | 6.00E-77  | um02562   | 5c00128  | 0         |
| BBH | 27d00073 | um11539   | 1.00E-118 | um11539   | 27d00073 | 1.00E-109 |
| BBH | 27c00088 | um12279   | 8.00E-45  | um12279   | 27c00088 | 3.00E-43  |
| BBH | 27d00089 | um04667   | 1.00E-132 | um04667   | 27d00089 | 1.00E-134 |
| BBH | 27d00039 | um10903   | 1.00E-174 | um10903   | 27d00039 | 1.00E-174 |
| BBH | 27c00093 | um04682   | 0         | um04682   | 27c00093 | 0         |
| NNN | 27d00023 | um04535   | 1.00E-100 |           |          |           |
| BBH | 27d00040 | um04566   | 1.00E-18  | um04566   | 27d00040 | 1.00E-19  |
| BBH | 27d00031 | um04551   | 1.00E-147 | um04551   | 27d00031 | 1.00E-160 |
| BBH | 27c00087 | um11551   | 1.00E-61  | um11551   | 27c00087 | 5.00E-63  |
| BBH | 27d00062 | um04610   | 1.00E-169 | um04610   | 27d00062 | 1.00E-170 |
| BBH | 27c00052 | um04592   | 1.00E-141 | um04592   | 27c00052 | 1.00E-135 |
| BBH | 27d00017 | um04524   | 1.00E-109 | um04524   | 27d00017 | 1.00E-108 |
| BBH | 27c00029 | um15013.2 | 0         | um15013.2 | 27c00029 | 1.00E-179 |
| BBH | 27c00060 | um10990   | 0         | um10990   | 27c00060 | 0         |

|     |          |           |           |           |          |           |
|-----|----------|-----------|-----------|-----------|----------|-----------|
| BBH | 27d00055 | um04594   | 0         | um04594   | 27d00055 | 0         |
| BBH | 27d00065 | um04622   | 0         | um04622   | 27d00065 | 0         |
| BBH | 27d00047 | um12272   | 0         | um12272   | 27d00047 | 0         |
| BBH | 27c00041 | um04573   | 3.00E-46  | um04573   | 27c00041 | 3.00E-46  |
| BBH | 27c00078 | um12276   | 2.00E-41  | um12276   | 27c00078 | 1.00E-53  |
| BBH | 27c00013 | um04511   | 1.00E-168 | um04511   | 27c00013 | 1.00E-169 |
| BBH | 27c00074 | um11536   | 1.00E-146 | um11536   | 27c00074 | 1.00E-146 |
| BBH | 27d00074 | um11540   | 0         | um11540   | 27d00074 | 0         |
| BBH | 27d00101 | um11765   | 0         | um11765   | 27d00101 | 0         |
| BBH | 27d00084 | um11548   | 3.00E-68  | um11548   | 27d00084 | 5.00E-75  |
| BBH | 27c00095 | um04678   | 2.00E-46  | um04678   | 27c00095 | 5.00E-48  |
| BBH | 27c00089 | um04666   | 7.00E-66  | um04666   | 27c00089 | 7.00E-66  |
| BBH | 27d00009 | um11986   | 0         | um11986   | 27d00009 | 0         |
| BBH | 27c00032 | um04558   | 1.00E-104 | um04558   | 27c00032 | 1.00E-106 |
| BBH | 27c00033 | um04561   | 1.00E-134 | um04561   | 27c00033 | 1.00E-134 |
| BBH | 27d00061 | um04607   | 0         | um04607   | 27d00061 | 0         |
| BBH | 27c00014 | um04514   | 2.00E-26  | um04514   | 27c00014 | 2.00E-20  |
| BBH | 27c00021 | um04531   | 1.00E-159 | um04531   | 27c00021 | 1.00E-172 |
| BBH | 27d00013 | um11990   | 2.00E-69  | um11990   | 27d00013 | 4.00E-75  |
| BBH | 27d00026 | um04541   | 7.00E-68  | um04541   | 27d00026 | 2.00E-68  |
| BBH | 27c00094 | um04680   | 0         | um04680   | 27c00094 | 0         |
| BBH | 27c00003 | um04496   | 0         | um04496   | 27c00003 | 0         |
| BBH | 27c00079 | um04644   | 1.00E-143 | um04644   | 27c00079 | 1.00E-149 |
| BBH | 27d00048 | um04584   | 0         | um04584   | 27d00048 | 0         |
| BBH | 27d00066 | um11533   | 2.00E-49  | um11533   | 27d00066 | 9.00E-50  |
| BBH | 27d00082 | um04649   | 0         | um04649   | 27d00082 | 0         |
| BBH | 27c00075 | um04637   | 5.00E-79  | um04637   | 27c00075 | 2.00E-83  |
| NNN | 27d00018 | um04525   | 6.00E-36  |           |          |           |
| BBH | 27d00091 | um04671   | 0         | um04671   | 27d00091 | 0         |
| BBH | 27d00008 | um04506   | 1.00E-126 | um04506   | 27d00008 | 1.00E-135 |
| BBH | 27d00052 | um04591   | 0         | um04591   | 27d00052 | 0         |
| BBH | 27c00072 | um04629   | 0         | um04629   | 27c00072 | 0         |
| BBH | 27c00096 | um04677   | 1.00E-139 | um04677   | 27c00096 | 1.00E-139 |
| BBH | 27d00075 | um11541   | 5.00E-84  | um11541   | 27d00075 | 6.00E-67  |
| NNN | 27d00029 | um04546   | 2.00E-92  |           |          |           |
| BBH | 27c00048 | um10911   | 0         | um10911   | 27c00048 | 0         |
| NNN | 27c00015 | um04516.2 | 0         |           |          |           |
| BBH | 27d00097 | um04681   | 1.00E-130 | um04681   | 27d00097 | 1.00E-147 |
| BBH | 27d00071 | um11535.2 | 5.00E-65  | um11535.2 | 27d00071 | 3.00E-58  |
| BBH | 27c00051 | um04590   | 1.00E-146 | um04590   | 27c00051 | 1.00E-141 |
| NNN | 27c00065 | um04619   | 0         |           |          |           |
| BBH | 27c00001 | um04499   | 1.00E-124 | um04499   | 27c00001 | 1.00E-124 |
| BBH | 27d00014 | um04522   | 0         | um04522   | 27d00014 | 0         |
| BBH | 27c00067 | um04623   | 1.00E-176 | um04623   | 27c00067 | 1.00E-171 |
| BBH | 27c00030 | um04550   | 0         | um04550   | 27c00030 | 0         |
| BBH | 27d00067 | um04628   | 2.00E-76  | um04628   | 27d00067 | 7.00E-70  |
| BBH | 27d00049 | um10910   | 1.00E-100 | um10910   | 27d00049 | 1.00E-104 |
| BBH | 27d00087 | um04661   | 6.00E-77  | um04661   | 27d00087 | 4.00E-77  |
| BBH | 27c00076 | um15065   | 0         | um15065   | 27c00076 | 0         |
| BBH | 27c00044 | um04578   | 0         | um04578   | 27c00044 | 0         |
| BBH | 27d00044 | um04572   | 3.00E-85  | um04572   | 27d00044 | 7.00E-91  |
| BBH | 27d00042 | um04576   | 7.00E-61  | um04576   | 27d00042 | 3.00E-81  |
| BBH | 27c00062 | um04611   | 1.00E-77  | um04611   | 27c00062 | 2.00E-78  |
| BBH | 27c00020 | um04526.2 | 2.00E-92  | um04526.2 | 27c00020 | 3.00E-96  |
| BBH | 27d00021 | um04532   | 0         | um04532   | 27d00021 | 0         |
| BBH | 27c00097 | um04674   | 0         | um04674   | 27c00097 | 0         |
| BBH | 27c00085 | um04657   | 0         | um04657   | 27c00085 | 0         |
| NNN | 27d00006 | um04503   | 0         |           |          |           |
| BBH | 27c00049 | um04588   | 9.00E-76  | um04588   | 27c00049 | 1.00E-75  |
| BBH | 27d00007 | um12269.2 | 0         | um12269.2 | 27d00007 | 0         |
| NNN | 27c00050 | um10912   | 1.00E-68  |           |          |           |
| BBH | 27c00023 | um11757.2 | 1.00E-45  | um11757.2 | 27c00023 | 2.00E-53  |

|     |          |           |           |           |          |           |  |
|-----|----------|-----------|-----------|-----------|----------|-----------|--|
| NNN | 27d00072 | um11537   | 6.00E-83  |           |          |           |  |
| BBH | 27d00024 | um04539   | 0         | um04539   | 27d00024 | 0         |  |
| BBH | 27d00037 | um04562   | 0         | um04562   | 27d00037 | 0         |  |
| BBH | 27c00016 | um04517.2 | 0         | um04517.2 | 27c00016 | 0         |  |
| BBH | 27d00051 | um12273.2 | 1.00E-28  | um12273.2 | 27d00051 | 4.00E-20  |  |
| BBH | 27c00045 | um04580   | 1.00E-57  | um04580   | 27c00045 | 5.00E-58  |  |
| NNN | 27d00068 | um04630   | 4.00E-39  | um04630   | 27d00069 | 1.00E-176 |  |
| BBH | 27c00077 | um04639   | 0         | um04639   | 27c00077 | 0         |  |
| BBH | 27d00098 | um04679   | 1.00E-110 | um04679   | 27d00098 | 1.00E-111 |  |
| BBH | 27d00056 | um10983.2 | 1.00E-163 | um10983.2 | 27d00056 | 1.00E-156 |  |
| BBH | 27c00063 | um04612   | 0         | um04612   | 27c00063 | 0         |  |
| BBH | 27d00022 | um04533   | 1.00E-165 | um04533   | 27d00022 | 1.00E-164 |  |
| BBH | 27c00070 | um04627   | 4.00E-66  | um04627   | 27c00070 | 8.00E-71  |  |
| BBH | 27c00031 | um04553   | 1.00E-130 | um04553   | 27c00031 | 1.00E-134 |  |
| BBH | 27c00019 | um11991   | 0         | um11991   | 27c00019 | 0         |  |
| BBH | 27d00030 | um04549   | 9.00E-86  | um04549   | 27d00030 | 3.00E-80  |  |
| BBH | 27d00054 | um04593   | 1.00E-52  | um04593   | 27d00054 | 1.00E-54  |  |
| BBH | 27d00019 | um04529   | 0         | um04529   | 27d00019 | 0         |  |
| BBH | 27c00017 | um04518   | 0         | um04518   | 27c00017 | 0         |  |
| BBH | 27d00038 | um04560   | 5.00E-55  | um04560   | 27d00038 | 1.00E-64  |  |
| BBH | 27d00050 | um04587   | 0         | um04587   | 27d00050 | 0         |  |
| BBH | 27c00080 | um04646   | 3.00E-71  | um04646   | 27c00080 | 1.00E-77  |  |
| BBH | 27c00042 | um12271   | 0         | um12271   | 27c00042 | 0         |  |
| BBH | 27c00068 | um04624   | 0         | um04624   | 27c00068 | 0         |  |
| NNN | 27d00046 | um04581   | 6.00E-78  |           |          |           |  |
| BBH | 27c00018 | um11989   | 0         | um11989   | 27c00018 | 0         |  |
| BBH | 27c00006 | um04494   | 0         | um04494   | 27c00006 | 0         |  |
| BBH | 27c00057 | um04602   | 0         | um04602   | 27c00057 | 0         |  |
| BBH | 27c00022 | um11756   | 6.00E-28  | um11756   | 27c00022 | 3.00E-26  |  |
| BBH | 27d00002 | um04487.2 | 0         | um04487.2 | 27d00002 | 0         |  |
| BBH | 27d00005 | um04501   | 1.00E-124 | um04501   | 27d00005 | 1.00E-124 |  |
| BBH | 27d00028 | um04544   | 1.00E-27  | um04544   | 27d00028 | 3.00E-13  |  |
| BBH | 27c00036 | um10904   | 1.00E-106 | um10904   | 27c00036 | 1.00E-101 |  |
| NNN | 27c00046 | um10909.2 | 5.00E-28  | um10909.2 | 27c00047 | 0         |  |
| BBH | 27c00037 | um10905   | 1.00E-124 | um10905   | 27c00037 | 1.00E-120 |  |
| BBH | 27c00027 | um11759   | 0         | um11759   | 27c00027 | 0         |  |
| NNN | 27c00025 | um10815   | 7.00E-24  | um10815   | 22d00064 | 0         |  |
| BBH | 27c00090 | um04668   | 1.00E-101 | um04668   | 27c00090 | 1.00E-108 |  |
| BBH | 27c00043 | um04577   | 0         | um04577   | 27c00043 | 0         |  |
| BBH | 27d00043 | um10908   | 0         | um10908   | 27d00043 | 0         |  |
| BBH | 27c00064 | um03801   | 2.00E-54  | um03801   | 27c00064 | 2.00E-54  |  |
| BBH | 27d00041 | um10906   | 5.00E-63  | um10906   | 27d00041 | 3.00E-68  |  |
| BBH | 27c00069 | um04625   | 2.00E-52  | um04625   | 27c00069 | 2.00E-52  |  |
| BBH | 27d00059 | um04603   | 0         | um04603   | 27d00059 | 0         |  |
| BBH | 27d00069 | um04630   | 1.00E-160 | um04630   | 27d00069 | 1.00E-176 |  |
| NNN | 27d00020 | um04530   | 1.00E-157 | um04530   | 11c00050 | 2.00E-13  |  |
| BBH | 27d00100 | um11761   | 1.00E-165 | um11761   | 27d00100 | 1.00E-163 |  |
| BBH | 27d00079 | um11544   | 7.00E-76  | um11544   | 27d00079 | 3.00E-74  |  |
| BBH | 27d00070 | um11534   | 1.00E-146 | um11534   | 27d00070 | 1.00E-146 |  |
| BBH | 27c00066 | um04621   | 1.00E-131 | um04621   | 27c00066 | 1.00E-121 |  |
| BBH | 27d00001 | um04497   | 0         | um04497   | 27d00001 | 0         |  |
| BBH | 27c00009 | um11984   | 5.00E-86  | um11984   | 27c00009 | 6.00E-99  |  |
| BBH | 27d00088 | um04665   | 0         | um04665   | 27d00088 | 0         |  |
| BBH | 27c00047 | um10909.2 | 0         | um10909.2 | 27c00047 | 0         |  |
| BBH | 27d00004 | um11983   | 2.00E-29  | um11983   | 27d00004 | 5.00E-29  |  |
| NNN | 27d00035 | um05602   | 1.00E-59  | um05602   | 16d00084 | 0         |  |
| BBH | 27d00027 | um04543   | 0         | um04543   | 27d00027 | 0         |  |
| BBH | 27c00005 | um11982   | 0         | um11982   | 27c00005 | 0         |  |
| BBH | 27c00040 | um04575   | 5.00E-24  | um04575   | 27c00040 | 2.00E-18  |  |
| BBH | 27c00010 | um04505   | 1.00E-157 | um04505   | 27c00010 | 1.00E-157 |  |
| BBH | 27c00082 | um12278   | 1.00E-45  | um12278   | 27c00082 | 3.00E-42  |  |
| BBH | 27d00092 | um11763   | 4.00E-93  | um11763   | 27d00092 | 3.00E-94  |  |



|     |           |           |           |           |          |           |
|-----|-----------|-----------|-----------|-----------|----------|-----------|
| BBH | 27d00063  | um04613   | 0         | um04613   | 27d00063 | 0         |
| BBH | 27d00058  | um04599   | 6.00E-92  | um04599   | 27d00058 | 1.00E-107 |
| BBH | 27d00083  | um04650   | 1.00E-149 | um04650   | 27d00083 | 1.00E-148 |
| BBH | 27d00011  | um11987   | 2.00E-85  | um11987   | 27d00011 | 6.00E-97  |
| BBH | 27d00010  | um04509   | 8.00E-63  | um04509   | 27d00010 | 9.00E-61  |
| NNN | 27c00026  | um01208   | 8.00E-25  | um01208   | 7c00160  | 3.00E-76  |
| BBH | 27d00034  | um10901   | 1.00E-113 | um10901   | 27d00034 | 1.00E-113 |
| BBH | 27c00024  | um04537   | 8.00E-32  | um04537   | 27c00024 | 5.00E-28  |
| BBH | 27d00060  | um04605   | 7.00E-84  | um04605   | 27d00060 | 4.00E-82  |
| BBH | 27d00003  | um04489   | 3.00E-81  | um04489   | 27d00003 | 6.00E-75  |
| BBH | 27d00033  | um04555   | 0         | um04555   | 27d00033 | 0         |
| BBH | 27c00039  | um10907   | 8.00E-60  | um10907   | 27c00039 | 3.00E-59  |
| BBH | 27d00025  | um11758   | 7.00E-47  | um11758   | 27d00025 | 1.00E-57  |
| BBH | 27c00055  | um10986   | 1.00E-17  | um10986   | 27c00055 | 4.00E-22  |
| BBH | 27c00002  | um04498   | 1.00E-148 | um04498   | 27c00002 | 1.00E-140 |
| BBH | 27c00083  | um11549   | 0         | um11549   | 27c00083 | 0         |
| BBH | 27c00061  | um04609   | 0         | um04609   | 27c00061 | 0         |
| BBH | 27c00059  | um10989   | 1.00E-69  | um10989   | 27c00059 | 4.00E-78  |
| BBH | 27d00086  | um04656.2 | 0         | um04656.2 | 27d00086 | 0         |
| BBH | 27d00081  | um11546   | 4.00E-19  | um11546   | 27d00081 | 1.00E-24  |
| BBH | 27d00064  | um11532   | 1.00E-61  | um11532   | 27d00064 | 3.00E-67  |
| NNN | 27c00073  | um04632   | 6.00E-28  |           |          |           |
| BBH | 27d00057  | um10985   | 1.00E-135 | um10985   | 27d00057 | 1.00E-136 |
| BBH | 27d00045  | um04579   | 0         | um04579   | 27d00045 | 0         |
| BBH | 27c00004  | um04488   | 3.00E-66  | um04488   | 27c00004 | 7.00E-68  |
| BBH | 27c00011  | um04508   | 1.00E-128 | um04508   | 27c00011 | 1.00E-119 |
| BBH | 27d00015  | um04523   | 0         | um04523   | 27d00015 | 0         |
| NNN | 27c00035  | um04563   | 0         |           |          |           |
| BBH | 27c00007  | um04495   | 2.00E-86  | um04495   | 27c00007 | 6.00E-93  |
| BBH | 27c00081  | um12277   | 2.00E-29  | um12277   | 27c00081 | 1.00E-30  |
| BBH | 27d00099  | um04676   | 1.00E-71  | um04676   | 27d00099 | 1.00E-105 |
| BBH | 27c00086  | um04659   | 0         | um04659   | 27c00086 | 0         |
| BBH | 27c00012  | um04510   | 3.00E-37  | um04510   | 27c00012 | 5.00E-35  |
| BBH | 27d00102  | um04673   | 0         | um04673   | 27d00102 | 0         |
| NNN | 27d00085  | um04655   | 1.00E-162 |           |          |           |
| BBH | 27c00058  | um10988   | 4.00E-71  | um10988   | 27c00058 | 4.00E-71  |
| BBH | 27c00092  | um04686   | 0         | um04686   | 27c00092 | 0         |
| BBH | 27c00054  | um04598   | 0         | um04598   | 27c00054 | 0         |
| BBH | 27d00090  | um04669   | 0         | um04669   | 27d00090 | 0         |
| BBH | 48c00001  | um00250   | 3.00E-65  | um00250   | 48c00001 | 2.00E-53  |
| NNN | 89d00001  | um02101   | 1.00E-49  | um02101   | 6d00101  | 4.00E-72  |
| NNN | 156c00001 | um05574   | 1.00E-62  | um05574   | 16d00065 | 1.00E-110 |

<sup>1</sup>NNN, not bi-directional best hit

<sup>2</sup>BBH, bi-directional best hit
