# Supplementary material for: Genome and Transcriptome Analysis of the Basidiomycetous Yeast Pseudozyma antarctica Producing Extracellular Glycolipids, Mannosylerythritol Lipids
Source: PubMed Central journal article supplement (PMC3933340; doi:10.1371/journal.pone.0086490), 2014-02-24
Supplement: pone.0086490.s005.pdf [file pone.0086490.s005.pdf]

## Supplementary Table S4

Putative plant cell wall-degrading enzymes in *P. antarctica* and other fungi

| Detailed comparison between <i>P. antarctica</i> and <i>U. maydis</i> |                                                                                                                                   |                                                                                                                        |    |    | Total number of enzymes in various fungi [50] |    |    |    |    |    |    |    |    |    |    |
|-----------------------------------------------------------------------|-----------------------------------------------------------------------------------------------------------------------------------|------------------------------------------------------------------------------------------------------------------------|----|----|-----------------------------------------------|----|----|----|----|----|----|----|----|----|----|
| Family                                                                | Glycoside hydrolases                                                                                                              | <i>P. antarctica</i> genes                                                                                             | Pa | Um | Pa                                            | Um | An | Mg | Fg | Nc | Sc | Sp | Pc | Cc | Cn |
| 1                                                                     | $\beta$ -glucosidase                                                                                                              | 8c00129, 13d00013                                                                                                      |    |    | 0                                             | 0  | 3  | 3  | 3  | 1  | 0  | 0  | 2  | 2  | 0  |
| 2                                                                     | $\beta$ -galactosidase<br>$\beta$ -mannosidase<br>$\beta$ -glucuronidase                                                          | 2c00076                                                                                                                | 1  | 1  | 1                                             | 1  | 9  | 6  | 5  | 5  | 0  | 0  | 0  | 0  | 0  |
| 3                                                                     | $\beta$ -glucosidase<br>xylan 1,4- $\beta$ -xylosidase<br>$\alpha$ -L-arabinofuranosidase<br>$\beta$ -N-acetylhexosaminidase      | 13c00090, 9d00216,<br>20d00032, 1d00031                                                                                | 4  | 3  | 4                                             | 3  | 20 | 19 | 18 | 9  | 0  | 1  | 7  | 6  | 3  |
| 5                                                                     | endomannanase<br>$\beta$ -1,4-endoglucanase<br>$\beta$ -1,3-exoglucanase<br><br>$\beta$ -1,6-glucanase 1<br>endoglycoceramidase 1 | 22c00082<br>9c00139, 7c00332,<br>7d00186, 11c00030,<br>20c00026, 9d00068,<br>15c00030, 12d00021,<br>20c00034. 20d00008 | 1  | 1  | 11                                            | 10 | 15 | 13 | 2  | 7  | 6  | 3  | 4  | 1  | 12 |
| 6                                                                     | cellobiohydrolase type II                                                                                                         |                                                                                                                        |    |    | 0                                             | 0  | 2  | 3  | 1  | 3  | 0  | 0  | 1  | 4  | 0  |
| 7                                                                     | cellobiohydrolase type I                                                                                                          |                                                                                                                        |    |    | 0                                             | 0  | 3  | 6  | 2  | 5  | 0  | 0  | 5  | 3  | 0  |
| 8                                                                     | $\beta$ -1,4-endoglucanase                                                                                                        | 7d00341                                                                                                                | 1  | 1  | 1                                             | 1  | 0  | 0  | 0  | 0  | 0  | 0  | 0  | 0  | 0  |
| 10                                                                    | endoxylanase                                                                                                                      | 8c00118, 11c00065                                                                                                      | 2  | 2  | 2                                             | 2  | 3  | 5  | 5  | 4  | 0  | 0  | 6  | 3  | 0  |
| 11                                                                    | endoxylanase                                                                                                                      | 22d00001                                                                                                               | 1  | 1  | 1                                             | 1  | 2  | 5  | 2  | 2  | 0  | 0  | 1  | 6  | 0  |
| 12                                                                    | xyloglucan-endoglucanase                                                                                                          |                                                                                                                        |    |    | 0                                             | 0  | 1  | 3  | 3  | 1  | 0  | 0  | 2  | 0  | 0  |
| 26                                                                    | endomannanase                                                                                                                     |                                                                                                                        |    |    | 0                                             | 0  | 3  | 0  | 0  | 1  | 0  | 0  | 0  | 0  | 0  |
| 27                                                                    | $\alpha$ -galactosidase                                                                                                           | 27d00006, 18c00065                                                                                                     | 2  | 1  | 1                                             | 2  | 3  | 4  | 2  | 0  | 5  | 1  | 3  | 0  | 0  |
| 28                                                                    | endopolygalacturonase<br>exopolygalacturonase                                                                                     | 5c00162                                                                                                                | 1  | 1  | 1                                             | 1  | 9  | 3  | 6  | 2  | 1  | 0  | 1  | 1  | 1  |

|                                                  |                                                    |                                         |   |   |   |   |    |    |    |    |   |   |    |    |   |  |  |
|--------------------------------------------------|----------------------------------------------------|-----------------------------------------|---|---|---|---|----|----|----|----|---|---|----|----|---|--|--|
| xylogalacturonan hydrolase<br>rhamnogalacturonan |                                                    |                                         |   |   |   |   |    |    |    |    |   |   |    |    |   |  |  |
| 35                                               | $\beta$ -galactosidase                             | 7c00120                                 | 1 | 1 | 1 | 1 | 4  | 0  | 2  | 2  | 0 | 0 | 1  | 0  | 0 |  |  |
| 36                                               | $\alpha$ -galactosidase                            |                                         |   |   | 0 | 0 | 4  | 2  | 2  | 1  | 0 | 0 | 0  | 0  | 1 |  |  |
| 42                                               | $\beta$ -galactosidase                             | 6d00052                                 | 1 | 1 | 1 | 1 | 0  | 0  | 0  | 0  | 0 | 0 | 0  | 0  | 0 |  |  |
| 43                                               | endoarabinanase<br>$\alpha$ -L-arabinofuranosidase | 12c00003, 8c00113,<br>18c00104, 9c00439 | 4 | 2 | 2 | 4 | 15 | 18 | 1  | 6  | 0 | 0 | 0  | 1  | 0 |  |  |
|                                                  | $\beta$ -xylosidase 8                              |                                         |   |   |   |   |    |    |    |    |   |   |    |    |   |  |  |
| 45                                               | $\beta$ -1,4-endoglucanase                         | 5d00140, 26c00038,<br>4d00037           | 3 | 3 | 3 | 3 | 1  | 1  | 0  | 1  | 0 | 0 | 0  | 0  | 0 |  |  |
| 51                                               | $\alpha$ -L-arabinofuranosidase                    | 7c00355, 22c00212,<br>26d00002          | 3 | 2 | 3 | 2 | 2  | 3  | 2  | 1  | 0 | 0 | 1  | 0  | 1 |  |  |
| 53                                               | endogalactanase                                    |                                         |   |   | 0 | 0 | 1  | 1  | 1  | 1  | 0 | 0 | 1  | 1  | 0 |  |  |
| 54                                               | $\alpha$ -L-arabinofuranosidase                    | 22c00021                                | 1 |   | 1 | 0 | 1  | 1  | 1  | 1  | 0 | 0 | 0  | 0  | 0 |  |  |
| 61                                               | $\beta$ -1,4-endoglucanase                         |                                         |   |   | 0 | 0 | 9  | 17 | 12 | 14 | 0 | 0 | 12 | 12 | 1 |  |  |
| 62                                               | arabinoxylan<br>arabinofuranohydrolase             | 9d00343                                 | 1 | 1 | 1 | 1 | 2  | 3  | 1  | 0  | 0 | 0 | 0  | 1  | 0 |  |  |
| 63                                               | $\alpha$ -1,3-glucosidase                          |                                         |   |   |   |   |    |    |    |    |   |   |    |    |   |  |  |
| 67                                               | $\alpha$ -glucuronidase                            | 5c00036                                 | 1 |   | 1 | 0 | 1  | 1  | 1  | 1  | 0 | 0 | 0  | 0  | 0 |  |  |
| 74                                               | xyloglucan-endoglucanase                           |                                         |   |   | 0 | 0 | 2  | 1  | 1  | 1  | 0 | 0 | 2  | 1  | 0 |  |  |
| 78                                               | $\alpha$ -rhamnosidase                             |                                         |   |   | 0 | 0 | 8  | 1  | 3  | 0  | 0 | 0 | 0  | 0  | 2 |  |  |
| 93                                               | exoarabinanase                                     |                                         |   |   | 0 | 0 | 2  | 1  | 2  | 2  | 0 | 0 | 0  | 0  | 0 |  |  |
| 95                                               | $\alpha$ -L-fucosidase                             |                                         |   |   | 0 | 0 | 3  | 1  | 2  | 0  | 0 | 0 | 1  | 0  | 0 |  |  |

| Family | Polysaccharide lyases         | <i>P. antarctica</i> genes | Pa | Um | Pa | Um | An | Mg | Fg | Nc | Sc | Sp | Pc | Cc | Cn |
|--------|-------------------------------|----------------------------|----|----|----|----|----|----|----|----|----|----|----|----|----|
| 1      | pectin lyase<br>pectate lyase | 26d00090                   | 1  | 1  | 1  | 1  | 8  | 2  | 6  | 1  | 0  | 0  | 0  | 0  | 0  |
| 3      | pectate lyase                 |                            |    |    | 0  | 0  | 5  | 1  | 7  | 1  | 0  | 0  | 0  | 1  | 0  |
| 4      | rhamnogalacturonan lyase      |                            |    |    | 0  | 0  | 4  | 1  | 1  | 1  | 0  | 0  | 0  | 2  | 1  |
| 9      | pectate lyase                 |                            |    |    | 0  | 0  | 1  | 0  | 1  | 0  | 0  | 0  | 0  | 0  | 0  |
| 11     | rhamnogalacturonan lyase      |                            |    |    | 0  | 0  | 1  | 0  | 1  | 0  | 0  | 0  | 0  | 0  | 0  |

| Family | Carbohydrate esterases | <i>P. antarctica</i> genes | Pa | Um | Pa | Um | An | Mg | Fg | Nc | Sc | Sp | Pc | Cc | Cn |
|--------|------------------------|----------------------------|----|----|----|----|----|----|----|----|----|----|----|----|----|
|--------|------------------------|----------------------------|----|----|----|----|----|----|----|----|----|----|----|----|----|

|                          |          |   |   |   |   |   |    |   |   |   |   |   |   |   |
|--------------------------|----------|---|---|---|---|---|----|---|---|---|---|---|---|---|
| 1 acetyl xylan esterase  | 27d00092 | 1 | 1 | 2 | 1 | 3 | 10 | 3 | 7 | 1 | 0 | 0 | 3 | 2 |
| feruloyl esterase        | 9c00307  | 1 |   |   |   |   |    |   |   |   |   |   |   |   |
| unknown                  |          |   |   |   |   |   |    |   |   |   |   |   |   |   |
| 8 pectin methyl esterase |          |   | 1 | 1 | 0 | 3 | 1  | 3 | 1 | 0 | 0 | 1 | 0 | 0 |
| 12 rhamnogalacturonan    |          |   |   | 0 | 0 | 2 | 2  | 1 | 1 | 0 | 0 | 0 | 1 | 0 |
| acetylcysteine           |          |   |   |   |   |   |    |   |   |   |   |   |   |   |
| unknown                  |          |   |   |   |   |   |    |   |   |   |   |   |   |   |

Abbreviations: Pa (*Pseudozyma antarctica*), Um (*Ustilago maydis*), An (*Aspergillus nidulans*), Mg (*Magnaporthe grisea*), Fg (*Fusarium graminearum*), Nc (*Neurospora crassa*), Sc (*Saccharomyces cerevisiae*), Sp (*Schizosaccharomyces pombe*), Pc (*Phanerochaete chrysosporium*), Cc (*Coprinus cinereus*), Cn (*Cryptococcus neoformans*).
