# Supplementary material for: Genome and Transcriptome Analysis of the Basidiomycetous Yeast Pseudozyma antarctica Producing Extracellular Glycolipids, Mannosylerythritol Lipids
Source: PubMed Central journal article supplement (PMC3933340; doi:10.1371/journal.pone.0086490), 2014-02-24
Supplement: pone.0086490.s006.pdf [file pone.0086490.s006.pdf]

### Supplementary Table S5

Gene clusters for secreted proteins in *P. antarctica*

| Cluster | Virulence of deletion mutants of <i>U. maydis</i> | <i>U. maydis</i> |                     | <i>P. antarctica</i> |                     | e-value   |           | Description                        |           |                      |                                                     |
|---------|---------------------------------------------------|------------------|---------------------|----------------------|---------------------|-----------|-----------|------------------------------------|-----------|----------------------|-----------------------------------------------------|
|         |                                                   | Genes            | Protein length (aa) | Identical genes      | Protein length (aa) | Um to Pa  | Pa to Um  |                                    |           |                      |                                                     |
| 1A      | unaffected                                        | um00444          | 537                 | 9c00246              | 523                 | 1.00E-144 | 1.00E-170 | hypothetical protein               |           |                      |                                                     |
|         |                                                   | um10115          | 83                  | 9d00215              |                     |           | 0.011     |                                    |           |                      |                                                     |
|         |                                                   | um00445          | 224                 | 9c00247              |                     |           | 5.00E-81  |                                    |           |                      |                                                     |
|         |                                                   | um00446          | 819                 | 9d00216              |                     |           | 819       |                                    | 0         | 0                    | beta-glucosidase                                    |
|         |                                                   | um00447          | 603                 | 9d00217              |                     |           | 417       |                                    | 1.00E-47  | 2.00E-41             | hypothetical protein                                |
| 2A      | increased                                         | um01233          | 492                 | 7d00152              | 490                 | 2.00E-64  | 0         | D-3-phosphoglycerate dehydrogenase |           |                      |                                                     |
|         |                                                   | um01234          | 441                 | 7c00150              |                     |           | 421       |                                    | 6.00E-58  | hypothetical protein |                                                     |
|         |                                                   | um01235          | 574                 | 7d00151              |                     |           | 6.00E-21  |                                    |           |                      |                                                     |
|         |                                                   | um01236          | 641                 | 7d00151              |                     |           | 3.00E-14  |                                    |           |                      |                                                     |
|         |                                                   | um01237          | 633                 | 7d00151              |                     |           | 528       |                                    | 3.00E-24  | 1.00E-23             | hypothetical protein                                |
|         |                                                   | <b>um01238</b>   | 306                 |                      |                     |           |           |                                    |           |                      |                                                     |
|         |                                                   | <b>um01239</b>   | 283                 |                      |                     |           |           |                                    |           |                      |                                                     |
|         |                                                   | <b>um01240</b>   | 279                 |                      |                     |           |           |                                    |           |                      |                                                     |
|         |                                                   | um01241          | 177                 | 7d00150              |                     |           | 212       |                                    | 2.00E-20  | 8.00E-24             | hypothetical protein                                |
|         |                                                   | um01242          | 705                 | 7d00149              |                     |           |           |                                    | 0         | 0                    | Signal recognition particle receptor, alpha subunit |
| 2B      | unaffected                                        | um01296          | 878                 | 12c00065             | 559                 | 6.00E-15  | 0         | Nuclear AAA ATPase (VCP subfamily) |           |                      |                                                     |
|         |                                                   | um01297          | 177                 | 12d00063             |                     |           | 703       |                                    | 0         | 0                    |                                                     |
|         |                                                   | um01298          | 266                 | 12d00063             |                     |           | 2.00E-13  |                                    |           |                      |                                                     |
|         |                                                   | um01299          | 162                 | 12d00062             |                     |           | 0.084     |                                    |           |                      |                                                     |
|         |                                                   | um01300          | 136                 | 12c00064             |                     |           | 5.00E-11  |                                    |           |                      |                                                     |
|         |                                                   | um01301          | 142                 | 12c00064             |                     |           | 136       |                                    | 4.00E-18  | hypothetical protein |                                                     |
|         |                                                   | um01302          | 149                 | 12c00064             |                     |           | 0.032     |                                    |           |                      |                                                     |
|         |                                                   | um10233          | 175                 | 12d00062             |                     |           | 3.00E-22  |                                    |           |                      |                                                     |
|         |                                                   | um10234          | 604                 | 12d00061             |                     |           | 603       |                                    | 0         | 0                    | poly(A)+ mRNA-nucleus export-related protein        |
| 3A      | unaffected                                        | um01885          | 354                 | 22d00222             | 354                 | 1.00E-160 | 1.00E-170 | alcohol dehydrogenase (predicted)  |           |                      |                                                     |
|         |                                                   | um01886          | 589                 | 22d00223             |                     |           | 589       |                                    | 0         | 0                    | carboxypeptidase C                                  |
|         |                                                   | um01887          | 135                 | 22c00245             |                     |           | 2.00E-13  |                                    |           |                      |                                                     |
|         |                                                   | um01888          | 583                 | 22d00248             |                     |           | 184       |                                    | 0         | 0                    | hypothetical protein                                |
|         |                                                   | um01889          | 1006                | 22d00249             |                     |           | 601       |                                    | 0         | 0                    | hypothetical protein                                |
| 5A      | unaffected                                        | um02191          | 758                 | 6c00052              | 773                 | 1.00E-145 | 1.00E-151 | hypothetical protein               |           |                      |                                                     |
|         |                                                   | <b>um02192</b>   | 210                 |                      |                     |           |           |                                    |           |                      |                                                     |
|         |                                                   | <b>um02193</b>   | 113                 |                      |                     |           |           |                                    |           |                      |                                                     |
|         |                                                   | <b>um02194</b>   | 109                 |                      |                     |           |           |                                    |           |                      |                                                     |
|         |                                                   | um10070          | 558                 | 6c00051              |                     |           | 560       |                                    | 0         | 0                    | Cytochrome P450 CYP3/CYP5/CYP6/CYP9 subfamilies     |
|         |                                                   | um02196          | 678                 | 6d00058              |                     |           | 469       |                                    | 4.00E-27  | 3.00E-29             | hypothetical protein                                |
|         |                                                   | um02197          | 430                 | 6d00056              |                     |           | 438       |                                    | 1.00E-162 | 1.00E-156            | hypothetical protein                                |
| 5B      | non-pathogenic                                    | um02472          | 638                 | 12c00131             | 636                 | 2.00E-87  | 1.00E-115 | hypothetical protein               |           |                      |                                                     |

|     |                  |                |      |           |      |           |           |                                              |
|-----|------------------|----------------|------|-----------|------|-----------|-----------|----------------------------------------------|
|     |                  | um02473        | 135  | 12d00091  | 131  | 4.00E-12  | 3.00E-15  |                                              |
|     |                  | um02474        | 230  | 12d00091  |      |           | 1.00E-07  |                                              |
|     |                  | um02475        | 515  | 12c00130  | 141  | 1.00E-41  | 6.00E-38  |                                              |
|     |                  | um02476        | 554  | 12d00122  | 551  | 0         | 0         | Coatomer subunit delta, putative             |
| 6A  | reduced          | um11414        | 280  | 5c00147   | 279  | 1.00E-105 | 1.00E-114 | cytoplasm protein                            |
|     |                  | <b>um02533</b> | 429  |           |      |           |           |                                              |
|     |                  | um11415        | 166  | 5c00143-6 |      |           | 7.00E-12  |                                              |
|     |                  | um02535        | 223  | 5c00145   | 155  | 1.00E-14  | 1.00E-14  | hypothetical protein                         |
|     |                  | um11416        | 197  | 5c00143-6 |      |           |           |                                              |
|     |                  | um02537        | 166  | 5c00143-6 |      |           |           |                                              |
|     |                  | um02538        | 160  | 5c00143-6 |      |           |           |                                              |
|     |                  | <b>um11417</b> | 179  |           |      |           |           |                                              |
|     |                  | um02540        | 208  | 5c00142   | 187  | 1.00E-20  | 1.00E-20  | hypothetical protein                         |
|     |                  | um02541        | 152  | 5d00135   |      |           | 3.00E-26  |                                              |
|     |                  | um02542        | 502  | 5c00141   | 487  | 1.00E-103 | 1.00E-100 | hypothetical protein                         |
| 8A  | unaffected       | um03200        | 1075 | 14c00098  | 917  | 0         | 1.00E-180 | DNA recombinational repair protein BRCA2     |
|     |                  | um03201        | 235  | 14d00089  | 196  | 4.00E-40  | 5.00E-40  |                                              |
|     |                  | <b>um03202</b> | 126  |           |      |           |           |                                              |
|     |                  | <b>um03203</b> | 129  |           |      |           |           |                                              |
|     |                  | um03204        | 2005 | 14d00088  | 1981 | 0         | 0         | chitin synthase-related                      |
| 9A  | unaffected       | um03614        | 489  | 8d00029   | 472  | 0         | 0         | hypothetical protein                         |
|     |                  | um03615        | 693  | 8c00030   | 710  | 0         | 0         | hypothetical protein                         |
|     |                  | um03616        | 703  | 8d00030   | 702  | 0         | 0         | hypothetical protein                         |
|     |                  | um03617        | 2358 | 8c00031   | 2332 | 0         | 0         | nucleolus protein                            |
| 10A | reduced          | um03743        | 724  | 10c00054  | 619  | 1.00E-171 | 1.00E-166 | Actin-like protein 13E                       |
|     |                  | um03744        | 680  | 10d00070  | 529  | 1.00E-26  | 5.00E-27  | hypothetical protein                         |
|     |                  | um03745        | 263  | 10d00069  |      |           | 2.00E-06  |                                              |
|     |                  | um03746        | 304  | 10d00068  | 571  | 1.00E-18  | 3.00E-19  | hypothetical protein                         |
|     |                  | um03747        | 223  | 22c00215  | 263  | 7.00E-11  | 9.00E-16  | hypothetical protein                         |
|     |                  | um03748        | 238  | 10d00067  |      |           | 8.00E-12  |                                              |
|     |                  | um03749        | 267  | 10d00066  |      |           | 9.00E-28  |                                              |
|     |                  | um03750        | 240  | 10d00069  |      |           | 2.00E-08  |                                              |
|     |                  | um03751        | 282  | 10d00066  |      |           | 4.00E-24  |                                              |
|     |                  | um03752        | 398  | 10d00066  |      |           | 7.00E-28  |                                              |
|     |                  | um03753        | 363  | 10d00066  | 970  | 3.00E-35  | 8.00E-36  | hypothetical protein                         |
|     |                  | um03754        | 378  | 10d00065  | 374  | 1.00E-100 | 5.00E-96  | protein N-terminal asparagine amidohydrolase |
|     |                  | um10660        | 309  | 10c00053  |      |           | e-102     |                                              |
| 19A | Markedly reduced | um05293        | 799  | 15c00068  | 808  | 0         | 0         | Oligosaccharyltransferase, STT3 subunit      |
|     |                  | um05294        | 204  | 15c00067  |      |           | 0.057     |                                              |
|     |                  | um05295        | 209  | 15c00067  | 198  | 3.00E-16  | 4.00E-16  | hypothetical protein                         |
|     |                  | um05296        | 248  | 15c00067  |      |           | 9.00E-14  |                                              |
|     |                  | <b>um10553</b> | 214  |           |      |           |           |                                              |
|     |                  | <b>um10554</b> | 193  |           |      |           |           |                                              |
|     |                  | um05299        | 234  | 15c00067  |      |           | 0.12      |                                              |

|     |            |                |      |          |     |          |           |          |                             |
|-----|------------|----------------|------|----------|-----|----------|-----------|----------|-----------------------------|
|     |            | um05300        | 218  |          |     |          |           |          |                             |
|     |            | um05301        | 251  | 15c00063 |     |          |           | 1.5      |                             |
|     |            | um05302        | 207  | 15c00065 | 248 | 2.00E-25 | 2.00E-25  |          | hypothetical protein        |
|     |            | <b>um05303</b> | 193  |          |     |          |           |          |                             |
|     |            | um10555        | 200  | 15c00064 |     |          |           | 5.00E-06 |                             |
|     |            | um05305        | 227  | 15c00064 |     |          |           | 0.023    |                             |
|     |            | um05306        | 287  | 15c00064 |     |          |           | 6.00E-22 |                             |
|     |            | um10556        | 264  | 15d00060 | 224 | 2.00E-20 | 2.00E-20  |          | hypothetical protein        |
|     |            | um05308        | 242  | 15c00063 | 305 | 2.00E-32 | 8.00E-30  |          | hypothetical protein        |
|     |            | um05309        | 195  | 15c00064 |     |          |           | 6.00E-22 |                             |
|     |            | <b>um05310</b> | 195  |          |     |          |           |          |                             |
|     |            | <b>um05311</b> | 220  |          |     |          |           |          |                             |
|     |            | <b>um05312</b> | 182  |          |     |          |           |          |                             |
|     |            | <b>um05313</b> | 494  |          |     |          |           |          |                             |
|     |            | <b>um05314</b> | 198  |          |     |          |           |          |                             |
|     |            | <b>um10557</b> | 180  |          |     |          |           |          |                             |
|     |            | <b>um05316</b> | 246  |          |     |          |           |          |                             |
|     |            | <b>um05317</b> | 178  |          |     |          |           |          |                             |
|     |            | <b>um05318</b> | 183  |          |     |          |           |          |                             |
|     |            | <b>um05319</b> | 185  |          |     |          |           |          |                             |
|     |            | um10558        | 471  | 15c00059 | 447 | 0        | 0         |          | Tubulin beta chain          |
| 22A | unaffected | um11233        | 254  | 24d00040 | 245 | 1.00E-22 | 1.00E-101 |          | 60s ribosomal protein L2/L8 |
|     |            | um06221        | 200  | 24c00044 |     |          | 1.00E-10  |          |                             |
|     |            | <b>um06222</b> | 163  |          |     |          |           |          |                             |
|     |            | <b>um06223</b> | 216  |          |     |          |           |          |                             |
|     |            | um06224        | 1225 | 24c00047 |     |          | 0         |          |                             |
