# Supplementary material for: Genome and Transcriptome Analysis of the Basidiomycetous Yeast Pseudozyma antarctica Producing Extracellular Glycolipids, Mannosylerythritol Lipids
Source: PubMed Central journal article supplement (PMC3933340; doi:10.1371/journal.pone.0086490), 2014-02-24
Supplement: pone.0086490.s007.pdf [file pone.0086490.s007.pdf]

**Supplementary Table S6**Transcriptome analysis of *P. antarctica* and *U. maydis* under the oily conditions

| <i>P. antarctica</i> |         |         | <i>U. maydis</i> |         |         |
|----------------------|---------|---------|------------------|---------|---------|
| Gene                 | M-value | A-value | Gene             | M-value | A-value |
| 10c0000              | 0.00    | 11.63   | um00001          | -0.26   | 12.08   |
| 10c0000              | 0.14    | 12.87   | um00002          | 0.03    | 11.81   |
| 10c0000              | -0.32   | 12.52   | um00003          | 0.42    | 11.84   |
| 10c0000              | -0.61   | 15.04   | um00005          | 2.22    | 12.76   |
| 10c0000              | -0.47   | 11.54   | um00006          | 0.00    | 11.67   |
| 10c0000              | 0.44    | 12.28   | um00007          | -0.22   | 12.76   |
| 10c0000              | 0.14    | 10.30   | um00008          | 0.08    | 11.50   |
| 10c0000              | 0.52    | 12.37   | um00009          | -0.53   | 13.18   |
| 10c0000              | 0.17    | 9.69    | um00011          | -0.97   | 11.80   |
| 10c0001              | 0.41    | 12.08   | um00012          | 0.30    | 11.25   |
| 10c0001              | -0.02   | 13.52   | um00013          | -0.47   | 12.23   |
| 10c0001              | -0.45   | 11.66   | um00017          | -0.02   | 11.80   |
| 10c0001              | -0.28   | 12.73   | um00020          | -1.32   | 12.47   |
| 10c0001              | -0.26   | 12.53   | um00025          | -3.16   | 10.56   |
| 10c0001              | 0.43    | 11.50   | um00026          | -0.70   | 11.97   |
| 10c0001              | 0.38    | 10.50   | um00027          | -3.94   | 13.26   |
| 10c0001              | -0.31   | 12.93   | um00028          | -0.88   | 13.96   |
| 10c0001              | 0.32    | 10.92   | um00029          | 0.04    | 9.50    |
| 10c0001              | -0.06   | 12.45   | um00030          | 0.34    | 10.66   |
| 10c0002              | -0.07   | 13.01   | um00031          | 0.28    | 12.33   |
| 10c0002              | -0.23   | 12.28   | um00032          | -0.12   | 9.03    |
| 10c0002              | -0.18   | 9.56    | um00034          | 1.65    | 11.45   |
| 10c0002              | 0.21    | 13.39   | um00036          | -0.19   | 14.66   |
| 10c0002              | -0.25   | 12.96   | um00037          | 2.55    | 11.45   |
| 10c0002              | -0.04   | 12.03   | um00038          | 1.22    | 10.41   |
| 10c0002              | -0.06   | 12.24   | um00039          | 0.48    | 11.33   |
| 10c0002              | -0.28   | 13.32   | um00040          | -0.06   | 11.67   |
| 10c0002              | -0.12   | 10.78   | um00041          | 0.31    | 12.32   |
| 10c0002              | -0.01   | 9.29    | um00042          | 0.05    | 10.70   |
| 10c0003              | -0.21   | 12.02   | um00043          | -0.62   | 12.00   |
| 10c0003              | 0.13    | 14.24   | um00045          | 1.16    | 12.91   |
| 10c0003              | -0.21   | 9.70    | um00046          | -0.63   | 11.26   |
| 10c0003              | 0.66    | 14.29   | um00047          | 0.57    | 11.34   |
| 10c0003              | -0.37   | 10.45   | um00048          | -0.20   | 12.11   |
| 10c0003              | 0.30    | 11.41   | um00049          | 0.40    | 11.77   |
| 10c0003              | -0.40   | 15.21   | um00050          | 0.99    | 14.66   |
| 10c0003              | 1.18    | 11.86   | um00052          | 0.34    | 12.03   |
| 10c0003              | 0.43    | 12.92   | um00053          | 0.54    | 10.97   |
| 10c0003              | -0.08   | 13.30   | um00054          | 0.00    | 9.24    |
| 10c0004              | 0.20    | 12.41   | um00055          | 0.08    | 10.93   |
| 10c0004              | -0.32   | 12.86   | um00056          | 0.32    | 9.14    |
| 10c0004              | -0.13   | 12.99   | um00057          | -0.18   | 11.97   |
| 10c0004              | 0.00    | 13.62   | um00058          | 0.18    | 9.57    |
| 10c0004              | 0.78    | 12.01   | um00059          | -0.28   | 12.30   |
| 10c0004              | -0.92   | 11.29   | um00060          | 0.51    | 9.25    |
| 10c0004              | 0.69    | 13.82   | um00061          | 0.11    | 11.34   |

|         |       |       |         |       |       |
|---------|-------|-------|---------|-------|-------|
| 10c0004 | -0.03 | 12.10 | um00062 | 0.11  | 9.04  |
| 10c0004 | -0.19 | 11.53 | um00063 | 0.88  | 12.08 |
| 10c0004 | 0.34  | 11.61 | um00064 | -0.27 | 9.20  |
| 10c0005 | -0.26 | 11.59 | um00067 | 0.17  | 12.75 |
| 10c0005 | -0.38 | 10.99 | um00068 | 0.33  | 10.75 |
| 10c0005 | 0.00  | 12.00 | um00071 | -0.06 | 11.74 |
| 10c0005 | -0.08 | 9.69  | um00072 | -0.63 | 13.20 |
| 10c0005 | 0.33  | 11.06 | um00074 | 0.29  | 11.36 |
| 10c0005 | 0.30  | 15.08 | um00076 | -0.05 | 11.28 |
| 10c0005 | 0.09  | 11.54 | um00077 | 0.58  | 11.61 |
| 10c0005 | 0.29  | 13.04 | um00078 | 1.06  | 10.67 |
| 10c0005 | 0.37  | 14.66 | um00079 | 1.73  | 10.82 |
| 10c0005 | -0.13 | 8.55  | um00080 | -0.32 | 11.64 |
| 10c0006 | 0.10  | 10.34 | um00081 | -0.54 | 11.27 |
| 10c0006 | -0.01 | 8.56  | um00082 | -1.50 | 9.85  |
| 10c0006 | 0.43  | 11.04 | um00083 | -0.85 | 9.68  |
| 10c0006 | -0.37 | 13.00 | um00084 | 0.05  | 10.67 |
| 10c0006 | -0.19 | 12.38 | um00085 | 0.53  | 10.79 |
| 10c0006 | 0.05  | 11.52 | um00087 | -0.84 | 13.03 |
| 10c0006 | -0.20 | 10.64 | um00089 | 0.11  | 11.86 |
| 10c0006 | -0.50 | 12.75 | um00090 | 0.46  | 9.94  |
| 10c0006 | -0.12 | 12.80 | um00091 | 0.16  | 11.19 |
| 10c0006 | 0.13  | 11.25 | um00092 | 0.50  | 13.07 |
| 10c0007 | -0.94 | 12.29 | um00094 | -0.23 | 14.49 |
| 10c0007 | 0.14  | 12.05 | um00095 | -0.19 | 12.84 |
| 10c0007 | -0.16 | 12.29 | um00096 | -2.27 | 14.00 |
| 10c0007 | 0.24  | 11.49 | um00097 | 0.21  | 12.35 |
| 10c0007 | 0.06  | 12.69 | um00098 | 0.54  | 11.68 |
| 10c0007 | 0.01  | 11.85 | um00099 | -0.03 | 12.51 |
| 10c0007 | 0.74  | 10.38 | um00101 | 0.02  | 10.62 |
| 10c0007 | 0.12  | 10.69 | um00102 | 0.38  | 9.16  |
| 10c0007 | -0.41 | 15.47 | um00103 | 1.02  | 11.81 |
| 10c0007 | -0.02 | 9.65  | um00104 | -0.17 | 8.75  |
| 10c0008 | -0.02 | 8.72  | um00105 | -0.18 | 11.90 |
| 10c0008 | 0.19  | 11.87 | um00108 | -1.50 | 12.77 |
| 10c0008 | -0.09 | 11.94 | um00109 | -0.37 | 14.14 |
| 10c0008 | 0.40  | 11.44 | um00111 | 1.25  | 13.98 |
| 10c0008 | 0.49  | 15.48 | um00113 | 0.42  | 11.82 |
| 10c0008 | -0.10 | 8.83  | um00114 | 0.30  | 11.64 |
| 10c0008 | 0.31  | 9.71  | um00115 | -2.38 | 11.82 |
| 10c0008 | 0.09  | 9.61  | um00116 | 1.21  | 10.19 |
| 10c0008 | 0.10  | 11.50 | um00117 | 1.09  | 11.44 |
| 10c0008 | -0.01 | 12.65 | um00118 | -1.40 | 9.56  |
| 10c0009 | 0.47  | 14.38 | um00119 | 0.31  | 12.34 |
| 10c0009 | 0.09  | 13.12 | um00120 | 0.15  | 11.17 |
| 10c0009 | 0.06  | 11.37 | um00122 | 1.19  | 11.93 |
| 10c0009 | 0.09  | 10.51 | um00123 | 0.56  | 10.89 |
| 10c0009 | -0.01 | 13.32 | um00124 | 0.63  | 12.34 |
| 10c0009 | -1.05 | 12.72 | um00125 | 0.61  | 12.29 |
| 10c0009 | -0.78 | 14.03 | um00126 | -0.20 | 11.89 |
| 10c0009 | -0.61 | 13.97 | um00127 | 0.48  | 11.52 |
| 10c0009 | -0.12 | 13.16 | um00130 | -0.30 | 13.53 |
| 10c0009 | -0.84 | 13.43 | um00131 | 0.30  | 11.83 |
| 10c0010 | -0.01 | 12.00 | um00132 | -0.63 | 11.12 |

|         |       |       |         |       |       |
|---------|-------|-------|---------|-------|-------|
| 10c0010 | -0.10 | 11.92 | um00133 | 0.60  | 9.94  |
| 10c0010 | 0.08  | 9.26  | um00136 | -0.01 | 9.94  |
| 10c0010 | -0.59 | 14.41 | um00137 | 0.28  | 11.12 |
| 10c0010 | 0.02  | 8.81  | um00138 | -0.83 | 11.74 |
| 10c0010 | -0.42 | 10.90 | um00140 | 0.32  | 10.77 |
| 10c0010 | 0.17  | 11.62 | um00141 | -0.59 | 9.92  |
| 10d0000 | 0.27  | 13.65 | um00144 | 0.46  | 10.57 |
| 10d0000 | 0.03  | 11.90 | um00145 | -0.20 | 11.95 |
| 10d0000 | -0.45 | 13.40 | um00146 | 0.50  | 12.69 |
| 10d0000 | -0.65 | 14.30 | um00148 | 0.49  | 9.55  |
| 10d0000 | -0.46 | 11.96 | um00149 | 0.03  | 11.88 |
| 10d0000 | 0.13  | 11.55 | um00152 | 0.42  | 12.10 |
| 10d0000 | 0.48  | 12.68 | um00153 | -0.06 | 13.59 |
| 10d0000 | -0.98 | 14.85 | um00154 | 0.19  | 9.11  |
| 10d0000 | 0.18  | 11.37 | um00156 | -0.08 | 10.07 |
| 10d0001 | 0.07  | 15.17 | um00157 | -1.85 | 14.02 |
| 10d0001 | 0.46  | 13.03 | um00159 | -0.33 | 12.71 |
| 10d0001 | 0.67  | 12.51 | um00160 | 0.36  | 14.25 |
| 10d0001 | 0.72  | 13.33 | um00161 | 0.25  | 11.26 |
| 10d0001 | 0.08  | 15.01 | um00163 | -0.32 | 11.73 |
| 10d0001 | 0.18  | 9.36  | um00164 | 1.43  | 11.88 |
| 10d0001 | -0.12 | 12.06 | um00166 | 0.69  | 10.20 |
| 10d0001 | 0.48  | 12.61 | um00167 | -0.10 | 10.35 |
| 10d0001 | 0.55  | 12.58 | um00168 | -0.33 | 11.56 |
| 10d0001 | 0.14  | 11.22 | um00169 | 0.07  | 12.75 |
| 10d0002 | 0.28  | 13.68 | um00171 | 0.12  | 11.34 |
| 10d0002 | -0.31 | 14.01 | um00172 | -0.21 | 9.60  |
| 10d0002 | 0.10  | 12.84 | um00174 | -0.39 | 12.43 |
| 10d0002 | -0.39 | 13.39 | um00175 | 0.26  | 13.10 |
| 10d0002 | -0.18 | 9.97  | um00176 | 0.22  | 13.34 |
| 10d0002 | -0.86 | 12.81 | um00177 | -0.92 | 12.05 |
| 10d0002 | 0.38  | 13.10 | um00179 | 0.87  | 11.41 |
| 10d0002 | 0.50  | 11.50 | um00180 | -0.03 | 10.49 |
| 10d0002 | -0.01 | 11.10 | um00181 | 0.14  | 10.81 |
| 10d0002 | 0.44  | 14.09 | um00182 | 2.23  | 10.65 |
| 10d0003 | 0.10  | 13.97 | um00183 | 0.42  | 10.85 |
| 10d0003 | 0.26  | 12.88 | um00184 | 0.09  | 10.58 |
| 10d0003 | 0.12  | 10.92 | um00187 | -0.16 | 8.63  |
| 10d0003 | 0.02  | 12.46 | um00188 | 1.15  | 9.97  |
| 10d0003 | -0.08 | 12.50 | um00189 | 0.15  | 10.29 |
| 10d0003 | -0.03 | 14.05 | um00191 | 0.54  | 10.55 |
| 10d0003 | -1.17 | 14.42 | um00192 | 0.25  | 12.74 |
| 10d0003 | 0.20  | 12.22 | um00193 | 0.10  | 12.71 |
| 10d0003 | -0.23 | 11.89 | um00194 | -0.11 | 8.91  |
| 10d0003 | 0.22  | 12.41 | um00195 | 0.12  | 11.90 |
| 10d0004 | -0.41 | 12.79 | um00196 | 1.83  | 13.01 |
| 10d0004 | -0.05 | 12.92 | um00197 | 1.33  | 12.76 |
| 10d0004 | 1.19  | 13.26 | um00199 | -0.06 | 12.28 |
| 10d0004 | 0.28  | 9.97  | um00202 | 0.47  | 9.46  |
| 10d0004 | 0.54  | 12.90 | um00203 | 0.47  | 10.64 |
| 10d0004 | -0.14 | 12.93 | um00204 | -0.32 | 13.33 |
| 10d0004 | 0.27  | 12.84 | um00205 | 2.97  | 13.91 |
| 10d0004 | -0.18 | 12.44 | um00206 | 0.65  | 11.45 |
| 10d0004 | 0.19  | 9.94  | um00207 | 0.27  | 11.86 |

|         |       |       |         |       |       |
|---------|-------|-------|---------|-------|-------|
| 10d0004 | 0.20  | 10.72 | um00208 | -0.54 | 10.24 |
| 10d0005 | -0.08 | 12.21 | um00209 | 2.34  | 13.31 |
| 10d0005 | -0.85 | 11.18 | um00210 | -0.40 | 13.77 |
| 10d0005 | 0.23  | 14.06 | um00211 | -0.73 | 10.57 |
| 10d0005 | -0.74 | 13.12 | um00212 | 0.03  | 11.50 |
| 10d0005 | 0.36  | 11.19 | um00213 | 0.32  | 11.84 |
| 10d0005 | 0.27  | 11.76 | um00215 | 0.30  | 11.38 |
| 10d0005 | -0.54 | 12.27 | um00216 | -0.26 | 11.62 |
| 10d0005 | -0.12 | 9.94  | um00218 | 0.31  | 11.09 |
| 10d0005 | -0.12 | 13.00 | um00219 | -0.60 | 11.68 |
| 10d0005 | -0.30 | 13.38 | um00221 | 0.27  | 12.51 |
| 10d0006 | 0.10  | 14.27 | um00222 | 0.97  | 9.86  |
| 10d0006 | 0.25  | 12.66 | um00223 | 0.45  | 9.31  |
| 10d0006 | -0.09 | 12.18 | um00224 | 0.01  | 10.69 |
| 10d0006 | -0.29 | 12.04 | um00225 | 0.36  | 11.38 |
| 10d0006 | 0.02  | 11.36 | um00226 | 0.46  | 11.65 |
| 10d0006 | -0.33 | 11.43 | um00227 | -0.33 | 11.35 |
| 10d0006 | 0.01  | 8.55  | um00229 | 1.59  | 11.73 |
| 10d0006 | -0.06 | 9.21  | um00230 | 1.73  | 10.13 |
| 10d0006 | 0.11  | 8.64  | um00233 | 0.13  | 11.38 |
| 10d0006 | 0.19  | 10.40 | um00235 | -0.20 | 11.24 |
| 10d0007 | 0.35  | 11.49 | um00236 | 1.27  | 9.72  |
| 10d0007 | 0.01  | 11.71 | um00238 | -0.41 | 12.75 |
| 10d0007 | 0.06  | 11.06 | um00239 | -0.20 | 11.72 |
| 10d0007 | 0.82  | 12.42 | um00240 | 0.00  | 10.76 |
| 10d0007 | 0.52  | 13.17 | um00241 | 1.84  | 13.80 |
| 10d0007 | -0.12 | 11.99 | um00242 | 0.14  | 10.55 |
| 10d0007 | 0.16  | 13.90 | um00244 | 0.04  | 12.37 |
| 10d0007 | 0.05  | 13.87 | um00245 | -0.95 | 11.55 |
| 10d0007 | 0.26  | 10.19 | um00247 | 0.66  | 12.03 |
| 10d0007 | -0.97 | 14.86 | um00249 | 0.31  | 11.89 |
| 10d0008 | -0.14 | 13.01 | um00250 | -0.01 | 14.72 |
| 10d0008 | -0.37 | 12.50 | um00251 | 0.25  | 10.83 |
| 10d0008 | -0.23 | 12.02 | um00254 | -0.33 | 9.18  |
| 10d0008 | 0.46  | 10.06 | um00255 | 0.93  | 11.72 |
| 10d0008 | 0.16  | 14.32 | um00256 | -0.05 | 13.18 |
| 10d0008 | 0.53  | 14.76 | um00258 | -0.11 | 11.71 |
| 10d0008 | 0.15  | 13.20 | um00259 | 0.13  | 10.68 |
| 10d0008 | 0.06  | 10.50 | um00262 | -0.22 | 15.23 |
| 10d0008 | -0.10 | 11.95 | um00263 | 0.43  | 11.97 |
| 10d0008 | -0.10 | 11.29 | um00264 | -0.94 | 10.74 |
| 10d0009 | 0.21  | 11.61 | um00265 | -1.07 | 12.49 |
| 10d0009 | -0.09 | 8.74  | um00266 | -0.18 | 11.09 |
| 10d0009 | 0.35  | 12.77 | um00270 | 0.21  | 12.41 |
| 10d0009 | -0.17 | 12.35 | um00271 | -1.06 | 13.56 |
| 10d0009 | 0.22  | 12.62 | um00272 | 0.46  | 12.33 |
| 10d0009 | 0.05  | 13.09 | um00273 | 0.26  | 14.41 |
| 10d0009 | -0.63 | 10.36 | um00274 | 0.10  | 13.65 |
| 10d0009 | -0.77 | 13.56 | um00275 | -0.22 | 11.26 |
| 10d0009 | -0.05 | 15.89 | um00276 | 0.01  | 8.42  |
| 10d0009 | 0.56  | 10.38 | um00277 | -0.22 | 10.63 |
| 10d0010 | -0.11 | 11.82 | um00278 | -0.19 | 9.24  |
| 10d0010 | 0.59  | 13.88 | um00280 | -0.20 | 11.91 |
| 10d0010 | -0.60 | 11.86 | um00282 | 0.15  | 11.56 |

|         |       |       |         |       |       |
|---------|-------|-------|---------|-------|-------|
| 10d0010 | 0.04  | 11.37 | um00283 | -1.14 | 11.83 |
| 10d0010 | 0.59  | 12.61 | um00284 | 0.05  | 12.17 |
| 10d0010 | 0.21  | 12.19 | um00286 | 0.84  | 11.92 |
| 10d0010 | 0.20  | 10.45 | um00288 | 0.79  | 11.02 |
| 10d0010 | -0.25 | 12.07 | um00289 | 0.07  | 10.76 |
| 10d0010 | -0.07 | 11.23 | um00290 | -0.30 | 10.39 |
| 10d0010 | 0.00  | 8.76  | um00291 | -0.38 | 12.18 |
| 10d0011 | 0.11  | 13.35 | um00292 | 0.40  | 11.21 |
| 10d0011 | 0.72  | 13.38 | um00293 | 0.19  | 10.65 |
| 10d0011 | -0.08 | 12.56 | um00295 | 0.66  | 14.34 |
| 10d0011 | -0.08 | 12.68 | um00296 | -0.69 | 11.83 |
| 10d0011 | -0.07 | 12.04 | um00297 | 0.67  | 12.10 |
| 10d0011 | 0.21  | 9.02  | um00298 | 0.33  | 11.61 |
| 10d0011 | 0.11  | 11.24 | um00299 | 0.04  | 11.33 |
| 10d0011 | -0.08 | 10.49 | um00300 | -0.10 | 10.80 |
| 10d0011 | -0.02 | 10.19 | um00302 | -0.35 | 10.89 |
| 10d0011 | 0.03  | 11.23 | um00304 | -0.48 | 12.13 |
| 10d0012 | 0.08  | 8.73  | um00305 | 0.19  | 10.97 |
| 10d0012 | 0.10  | 11.47 | um00306 | -0.07 | 8.64  |
| 10d0012 | -0.52 | 10.35 | um00308 | 0.87  | 10.48 |
| 10d0012 | 0.24  | 10.45 | um00309 | -5.39 | 13.34 |
| 11c0000 | -0.16 | 13.32 | um00310 | -0.10 | 10.44 |
| 11c0000 | -0.20 | 8.92  | um00311 | -1.12 | 12.59 |
| 11c0000 | -0.05 | 8.84  | um00315 | -1.08 | 13.41 |
| 11c0000 | 0.34  | 12.20 | um00316 | -1.60 | 11.23 |
| 11c0000 | -0.30 | 12.16 | um00317 | 0.45  | 11.18 |
| 11c0000 | -0.42 | 12.51 | um00318 | -0.16 | 11.47 |
| 11c0000 | 0.18  | 14.42 | um00319 | -0.43 | 11.07 |
| 11c0000 | -0.43 | 9.98  | um00321 | 0.15  | 11.25 |
| 11c0000 | -0.22 | 12.07 | um00322 | 0.41  | 10.33 |
| 11c0001 | -0.42 | 13.53 | um00325 | 0.45  | 11.24 |
| 11c0001 | -0.09 | 13.21 | um00326 | -0.29 | 14.73 |
| 11c0001 | -0.53 | 13.15 | um00328 | -0.30 | 10.25 |
| 11c0001 | 0.03  | 11.48 | um00329 | 0.06  | 12.28 |
| 11c0001 | -0.79 | 13.45 | um00330 | -1.27 | 11.77 |
| 11c0001 | -0.20 | 13.59 | um00332 | 0.53  | 10.74 |
| 11c0001 | 0.35  | 10.50 | um00333 | 0.19  | 11.67 |
| 11c0001 | -0.01 | 9.59  | um00334 | -0.34 | 12.66 |
| 11c0001 | -0.07 | 12.82 | um00336 | 2.11  | 13.60 |
| 11c0001 | -0.16 | 9.52  | um00337 | -0.20 | 9.17  |
| 11c0002 | 0.02  | 10.74 | um00338 | 0.05  | 11.77 |
| 11c0002 | 0.29  | 14.60 | um00340 | 0.53  | 11.70 |
| 11c0002 | -0.36 | 10.91 | um00342 | -0.08 | 10.66 |
| 11c0002 | 0.32  | 13.53 | um00343 | 1.23  | 14.74 |
| 11c0002 | -1.24 | 12.18 | um00344 | 0.05  | 11.13 |
| 11c0002 | 0.07  | 9.01  | um00347 | -0.23 | 10.73 |
| 11c0002 | 0.50  | 9.85  | um00349 | 0.39  | 11.75 |
| 11c0002 | 1.29  | 14.28 | um00350 | 0.45  | 13.44 |
| 11c0002 | 1.38  | 11.25 | um00353 | 0.38  | 11.98 |
| 11c0002 | -1.05 | 12.49 | um00354 | 0.60  | 10.77 |
| 11c0003 | -1.53 | 11.55 | um00355 | 0.41  | 10.44 |
| 11c0003 | 0.25  | 10.23 | um00356 | -0.33 | 11.47 |
| 11c0003 | -0.10 | 13.54 | um00357 | 0.31  | 13.49 |
| 11c0003 | -0.38 | 12.29 | um00358 | -0.08 | 8.81  |

|         |       |       |         |       |       |
|---------|-------|-------|---------|-------|-------|
| 11c0003 | -0.25 | 12.74 | um00360 | 0.25  | 12.13 |
| 11c0003 | 0.65  | 10.11 | um00361 | -0.19 | 11.69 |
| 11c0003 | 0.09  | 12.94 | um00362 | -0.16 | 12.59 |
| 11c0003 | -0.54 | 12.49 | um00364 | 0.00  | 10.58 |
| 11c0003 | -0.29 | 11.60 | um00365 | -0.15 | 10.35 |
| 11c0003 | -0.13 | 11.05 | um00366 | -0.47 | 11.73 |
| 11c0004 | 0.01  | 8.98  | um00369 | 0.40  | 10.91 |
| 11c0004 | -0.31 | 11.71 | um00370 | 0.35  | 11.95 |
| 11c0004 | -0.53 | 13.55 | um00371 | 2.30  | 14.30 |
| 11c0004 | -0.25 | 12.48 | um00372 | -0.46 | 12.29 |
| 11c0004 | 0.22  | 12.96 | um00374 | -2.85 | 12.81 |
| 11c0004 | 0.17  | 11.13 | um00375 | 0.27  | 9.73  |
| 11c0004 | 0.19  | 12.88 | um00376 | 0.37  | 11.87 |
| 11c0004 | 0.10  | 13.74 | um00378 | -0.48 | 9.71  |
| 11c0004 | 0.17  | 12.91 | um00379 | 0.23  | 13.17 |
| 11c0004 | 0.23  | 13.63 | um00380 | 0.54  | 11.26 |
| 11c0005 | 0.80  | 10.85 | um00381 | 0.69  | 14.03 |
| 11c0005 | -0.12 | 13.28 | um00384 | -0.37 | 9.10  |
| 11c0005 | 0.13  | 9.59  | um00385 | -0.73 | 11.75 |
| 11c0005 | 0.34  | 10.88 | um00386 | -0.79 | 12.86 |
| 11c0005 | -0.02 | 11.18 | um00387 | -0.25 | 15.47 |
| 11c0005 | -0.23 | 13.24 | um00388 | -0.14 | 8.65  |
| 11c0005 | -0.21 | 11.63 | um00389 | -0.12 | 11.18 |
| 11c0005 | 0.15  | 15.78 | um00390 | 0.23  | 10.60 |
| 11c0005 | -0.14 | 13.17 | um00391 | -0.18 | 12.25 |
| 11c0005 | 0.47  | 12.15 | um00392 | -0.73 | 12.29 |
| 11c0006 | 0.22  | 10.57 | um00393 | 0.38  | 10.60 |
| 11c0006 | 0.60  | 13.72 | um00394 | 0.09  | 12.04 |
| 11c0006 | -0.59 | 12.82 | um00395 | -0.21 | 8.66  |
| 11c0006 | -0.49 | 12.65 | um00397 | 1.36  | 11.71 |
| 11c0006 | 0.03  | 11.38 | um00399 | 0.14  | 12.11 |
| 11c0006 | -0.04 | 9.14  | um00400 | 0.62  | 11.41 |
| 11c0006 | -0.18 | 11.72 | um00403 | -0.17 | 14.90 |
| 11c0006 | -0.25 | 12.13 | um00405 | 0.15  | 11.58 |
| 11c0006 | -0.03 | 10.28 | um00406 | 1.52  | 13.62 |
| 11c0006 | 0.81  | 13.87 | um00407 | 0.61  | 11.25 |
| 11c0007 | -0.03 | 8.89  | um00410 | 0.02  | 11.54 |
| 11c0007 | 0.61  | 14.70 | um00411 | 0.95  | 9.77  |
| 11c0007 | -0.14 | 13.44 | um00412 | 0.97  | 11.32 |
| 11c0007 | 0.03  | 10.61 | um00414 | -0.05 | 10.96 |
| 11c0007 | -0.28 | 14.12 | um00415 | -0.23 | 12.19 |
| 11c0007 | 0.16  | 9.13  | um00417 | -0.38 | 12.34 |
| 11c0007 | -0.03 | 9.19  | um00418 | -0.39 | 11.69 |
| 11c0007 | -0.73 | 13.65 | um00419 | 0.20  | 10.19 |
| 11c0007 | 0.02  | 12.07 | um00420 | 0.23  | 8.98  |
| 11c0007 | 0.56  | 14.27 | um00422 | 0.21  | 12.85 |
| 11c0008 | -0.10 | 11.01 | um00423 | -0.05 | 13.69 |
| 11c0008 | 0.32  | 12.57 | um00424 | -0.23 | 12.46 |
| 11c0008 | -0.04 | 12.45 | um00427 | -0.19 | 10.77 |
| 11c0008 | -0.84 | 12.85 | um00428 | 2.02  | 11.13 |
| 11c0008 | 0.10  | 11.46 | um00429 | -0.25 | 12.27 |
| 11c0008 | -0.10 | 13.32 | um00430 | -1.04 | 14.45 |
| 11c0008 | -0.40 | 11.53 | um00432 | -0.10 | 13.88 |
| 11c0008 | -0.12 | 13.29 | um00435 | 0.34  | 11.76 |

|         |       |       |         |       |       |
|---------|-------|-------|---------|-------|-------|
| 11c0008 | -0.73 | 11.13 | um00438 | 0.06  | 11.70 |
| 11c0008 | 0.12  | 11.15 | um00439 | 0.16  | 11.16 |
| 11c0009 | -0.21 | 9.96  | um00440 | 0.14  | 12.12 |
| 11d0000 | -0.06 | 8.88  | um00441 | -1.52 | 9.81  |
| 11d0000 | 0.35  | 10.66 | um00442 | -0.79 | 10.10 |
| 11d0000 | -0.38 | 13.55 | um00443 | 0.22  | 10.25 |
| 11d0000 | 0.06  | 9.21  | um00444 | 0.49  | 11.11 |
| 11d0000 | -0.10 | 9.14  | um00445 | -0.20 | 8.71  |
| 11d0000 | -0.26 | 13.77 | um00446 | 0.09  | 11.39 |
| 11d0000 | -0.11 | 13.73 | um00447 | 0.41  | 10.82 |
| 11d0000 | -0.08 | 8.78  | um00448 | 0.84  | 10.76 |
| 11d0000 | 0.50  | 11.39 | um00449 | -0.16 | 8.69  |
| 11d0001 | 0.03  | 8.54  | um00450 | -0.15 | 11.82 |
| 11d0001 | 0.19  | 11.82 | um00451 | 0.53  | 12.55 |
| 11d0001 | -0.02 | 9.32  | um00452 | 0.23  | 11.29 |
| 11d0001 | -0.14 | 12.90 | um00454 | -0.65 | 11.01 |
| 11d0001 | -0.13 | 13.81 | um00455 | 1.33  | 12.29 |
| 11d0001 | 0.20  | 9.14  | um00458 | 0.22  | 12.14 |
| 11d0001 | 0.13  | 10.91 | um00459 | -0.64 | 10.51 |
| 11d0001 | 0.38  | 12.88 | um00460 | 0.31  | 11.82 |
| 11d0001 | 0.04  | 8.65  | um00461 | -0.41 | 12.99 |
| 11d0001 | -0.08 | 11.79 | um00463 | 0.97  | 11.64 |
| 11d0002 | 0.26  | 12.28 | um00464 | -0.37 | 11.88 |
| 11d0002 | -0.05 | 12.20 | um00465 | -2.71 | 10.99 |
| 11d0002 | 0.50  | 12.86 | um00466 | 1.09  | 10.27 |
| 11d0002 | 0.31  | 9.53  | um00467 | 0.11  | 10.24 |
| 11d0002 | 0.22  | 12.53 | um00468 | -0.68 | 11.69 |
| 11d0002 | 0.35  | 11.68 | um00469 | 0.12  | 12.76 |
| 11d0002 | 0.44  | 9.26  | um00473 | 0.44  | 12.35 |
| 11d0002 | -0.01 | 9.63  | um00475 | 0.45  | 12.99 |
| 11d0002 | 0.20  | 12.02 | um00476 | -0.05 | 11.85 |
| 11d0002 | 0.24  | 11.06 | um00477 | -0.01 | 9.10  |
| 11d0003 | 0.14  | 11.80 | um00478 | -0.75 | 10.91 |
| 11d0003 | 0.40  | 11.47 | um00480 | -0.33 | 12.38 |
| 11d0003 | -0.03 | 11.52 | um00481 | 0.58  | 12.99 |
| 11d0003 | -1.61 | 13.88 | um00482 | 0.43  | 11.21 |
| 11d0003 | -0.34 | 12.78 | um00483 | -0.07 | 11.13 |
| 11d0003 | 0.37  | 12.62 | um00486 | -1.15 | 14.47 |
| 11d0003 | -0.02 | 10.64 | um00490 | 0.72  | 11.85 |
| 11d0003 | 0.12  | 12.58 | um00491 | 0.20  | 11.62 |
| 11d0003 | 0.13  | 13.70 | um00492 | -1.39 | 12.29 |
| 11d0003 | 0.66  | 12.72 | um00493 | -0.05 | 11.32 |
| 11d0004 | -0.09 | 11.81 | um00494 | -0.20 | 12.14 |
| 11d0004 | -0.11 | 12.36 | um00495 | -0.77 | 12.81 |
| 11d0004 | -0.01 | 9.35  | um00496 | 3.67  | 13.02 |
| 11d0004 | -0.15 | 12.72 | um00499 | 0.64  | 11.86 |
| 11d0004 | -0.32 | 12.63 | um00501 | 0.15  | 11.62 |
| 11d0004 | -0.41 | 11.21 | um00503 | 0.36  | 14.03 |
| 11d0004 | 0.06  | 15.52 | um00505 | -0.15 | 12.01 |
| 11d0004 | 0.02  | 11.61 | um00506 | -0.47 | 12.02 |
| 11d0004 | -0.03 | 8.34  | um00507 | 0.43  | 10.93 |
| 11d0004 | -0.03 | 15.60 | um00508 | -0.23 | 15.40 |
| 11d0005 | -0.07 | 11.40 | um00510 | -0.63 | 11.69 |
| 11d0005 | 0.09  | 13.44 | um00512 | 0.73  | 13.38 |

|         |       |       |         |       |       |
|---------|-------|-------|---------|-------|-------|
| 11d0005 | 0.29  | 10.77 | um00513 | 0.14  | 10.92 |
| 11d0005 | -0.39 | 11.60 | um00515 | 0.70  | 12.07 |
| 11d0005 | 0.20  | 13.25 | um00516 | 0.09  | 10.70 |
| 11d0005 | -0.10 | 11.13 | um00518 | -0.01 | 11.80 |
| 11d0005 | 0.65  | 12.34 | um00522 | -0.23 | 8.83  |
| 11d0005 | -0.15 | 12.01 | um00523 | 0.12  | 11.80 |
| 11d0005 | 0.11  | 12.56 | um00525 | -0.02 | 12.04 |
| 11d0005 | -0.05 | 9.03  | um00526 | 0.57  | 11.92 |
| 11d0006 | -0.12 | 12.67 | um00527 | 0.43  | 11.63 |
| 11d0006 | 0.82  | 13.22 | um00528 | 0.28  | 10.96 |
| 11d0006 | 0.49  | 11.87 | um00529 | 4.04  | 12.50 |
| 11d0006 | 0.60  | 12.03 | um00530 | 0.92  | 10.23 |
| 11d0006 | -0.26 | 11.18 | um00532 | -0.20 | 12.46 |
| 11d0006 | -0.40 | 9.44  | um00533 | -0.35 | 11.68 |
| 11d0006 | -0.02 | 12.06 | um00534 | -0.22 | 12.62 |
| 11d0006 | 0.00  | 12.54 | um00535 | 0.69  | 11.36 |
| 11d0006 | 0.43  | 13.66 | um00536 | 0.18  | 11.29 |
| 11d0006 | -0.09 | 10.12 | um00538 | 0.32  | 9.78  |
| 11d0007 | 0.13  | 13.43 | um00539 | 0.15  | 11.56 |
| 11d0007 | 0.22  | 12.28 | um00540 | 0.38  | 11.39 |
| 11d0007 | -0.07 | 9.73  | um00542 | -0.22 | 11.48 |
| 11d0007 | -0.17 | 11.93 | um00543 | 0.31  | 12.69 |
| 11d0007 | 0.10  | 12.13 | um00545 | 1.00  | 12.58 |
| 11d0007 | 0.82  | 12.77 | um00547 | -0.94 | 11.42 |
| 11d0007 | -0.04 | 12.39 | um00548 | -0.69 | 11.98 |
| 11d0007 | 0.30  | 13.08 | um00549 | -0.48 | 11.14 |
| 11d0007 | 0.82  | 11.85 | um00550 | -0.44 | 9.41  |
| 11d0007 | -0.02 | 8.78  | um00551 | -0.48 | 12.11 |
| 11d0008 | -0.33 | 13.08 | um00553 | -0.14 | 11.64 |
| 11d0008 | 0.27  | 12.70 | um00555 | -0.90 | 12.64 |
| 11d0008 | -0.01 | 13.12 | um00557 | -0.21 | 13.56 |
| 11d0008 | -0.17 | 13.16 | um00558 | 0.60  | 9.31  |
| 11d0008 | 0.24  | 10.84 | um00559 | 0.00  | 8.69  |
| 11d0008 | 0.09  | 10.83 | um00560 | 0.48  | 13.42 |
| 11d0008 | -0.09 | 8.94  | um00561 | 0.18  | 11.89 |
| 11d0008 | -0.38 | 12.11 | um00562 | 0.75  | 12.09 |
| 11d0008 | -0.15 | 10.20 | um00563 | 0.25  | 12.70 |
| 11d0008 | 0.24  | 12.05 | um00564 | -0.15 | 11.52 |
| 11d0009 | -0.23 | 12.31 | um00565 | -0.53 | 12.56 |
| 12c0000 | -0.86 | 9.31  | um00567 | -1.46 | 11.90 |
| 12c0000 | -0.65 | 11.34 | um00568 | 0.51  | 12.69 |
| 12c0000 | -0.22 | 10.36 | um00569 | 0.33  | 11.01 |
| 12c0000 | -0.33 | 8.95  | um00572 | 0.60  | 11.30 |
| 12c0000 | 1.70  | 11.97 | um00573 | 1.87  | 14.29 |
| 12c0000 | -0.13 | 12.82 | um00574 | 0.01  | 10.97 |
| 12c0000 | -0.06 | 11.94 | um00575 | 0.28  | 11.30 |
| 12c0000 | 0.35  | 10.66 | um00576 | 0.65  | 11.46 |
| 12c0000 | -0.03 | 12.97 | um00578 | -0.33 | 8.91  |
| 12c0001 | 0.16  | 10.57 | um00579 | -0.26 | 12.26 |
| 12c0001 | 0.15  | 9.95  | um00581 | -0.35 | 11.48 |
| 12c0001 | 1.18  | 11.25 | um00582 | -0.24 | 12.60 |
| 12c0001 | 0.43  | 11.99 | um00583 | -0.93 | 13.57 |
| 12c0001 | -0.84 | 12.26 | um00584 | -0.51 | 13.30 |
| 12c0001 | -0.55 | 12.40 | um00585 | -0.30 | 12.72 |



|         |       |       |         |       |       |
|---------|-------|-------|---------|-------|-------|
| 12c0001 | 0.15  | 14.17 | um00586 | -0.17 | 9.89  |
| 12c0001 | -0.22 | 13.27 | um00588 | 0.22  | 12.41 |
| 12c0001 | -0.17 | 10.71 | um00589 | 0.67  | 12.69 |
| 12c0001 | 0.59  | 14.37 | um00590 | -0.15 | 11.31 |
| 12c0002 | -0.31 | 13.12 | um00592 | 0.24  | 11.55 |
| 12c0002 | -0.59 | 13.48 | um00593 | 1.53  | 10.06 |
| 12c0002 | -0.24 | 12.58 | um00594 | -1.02 | 13.55 |
| 12c0002 | -0.34 | 11.85 | um00595 | -1.09 | 13.54 |
| 12c0002 | 0.49  | 13.32 | um00596 | -0.04 | 10.25 |
| 12c0002 | -0.07 | 10.10 | um00597 | -0.57 | 11.89 |
| 12c0002 | 0.23  | 10.12 | um00598 | -0.12 | 11.82 |
| 12c0002 | -0.40 | 12.46 | um00599 | 0.61  | 11.45 |
| 12c0002 | -0.02 | 12.69 | um00601 | 0.56  | 10.82 |
| 12c0002 | -0.15 | 11.36 | um00602 | -0.15 | 11.84 |
| 12c0003 | -0.12 | 9.45  | um00603 | 0.16  | 11.53 |
| 12c0003 | 0.00  | 9.50  | um00604 | 0.41  | 11.76 |
| 12c0003 | -0.04 | 14.35 | um00605 | -0.37 | 11.68 |
| 12c0003 | -0.30 | 11.37 | um00606 | -1.13 | 11.70 |
| 12c0003 | -0.26 | 9.73  | um00607 | -0.17 | 11.88 |
| 12c0003 | 0.04  | 9.16  | um00608 | -0.57 | 12.43 |
| 12c0003 | -0.67 | 13.34 | um00609 | 0.16  | 11.06 |
| 12c0003 | -0.46 | 10.35 | um00610 | 0.61  | 12.15 |
| 12c0003 | -0.44 | 11.63 | um00612 | -0.15 | 12.27 |
| 12c0003 | 0.48  | 12.65 | um00614 | 0.07  | 12.31 |
| 12c0004 | -0.24 | 9.66  | um00615 | 0.15  | 11.64 |
| 12c0004 | -0.20 | 10.90 | um00616 | -0.17 | 12.65 |
| 12c0004 | 0.44  | 12.39 | um00617 | -0.24 | 11.99 |
| 12c0004 | -0.64 | 12.48 | um00620 | -0.43 | 11.72 |
| 12c0004 | 0.14  | 12.80 | um00622 | -0.46 | 13.15 |
| 12c0004 | 0.44  | 12.60 | um00623 | 1.11  | 11.28 |
| 12c0004 | 0.30  | 13.62 | um00624 | 0.19  | 12.13 |
| 12c0004 | -0.55 | 11.02 | um00625 | 0.21  | 11.53 |
| 12c0004 | 0.86  | 11.02 | um00627 | 0.01  | 8.63  |
| 12c0004 | -0.08 | 10.54 | um00628 | -0.25 | 8.68  |
| 12c0005 | -0.20 | 10.08 | um00629 | -0.17 | 8.70  |
| 12c0005 | 0.04  | 11.36 | um00630 | -0.45 | 13.96 |
| 12c0005 | 0.31  | 11.56 | um00632 | -0.06 | 11.07 |
| 12c0005 | 0.33  | 14.99 | um00634 | 0.85  | 12.92 |
| 12c0005 | -0.41 | 12.68 | um00635 | -0.45 | 12.42 |
| 12c0005 | -0.08 | 13.48 | um00636 | 0.97  | 12.72 |
| 12c0005 | -0.30 | 12.57 | um00637 | -0.50 | 13.56 |
| 12c0005 | -0.52 | 15.16 | um00638 | -0.13 | 14.14 |
| 12c0005 | -0.42 | 11.98 | um00639 | -0.30 | 11.62 |
| 12c0005 | 0.51  | 12.56 | um00644 | -0.43 | 11.20 |
| 12c0006 | 0.13  | 11.75 | um00645 | 0.34  | 11.50 |
| 12c0006 | -0.04 | 12.27 | um00646 | -0.41 | 13.68 |
| 12c0006 | 0.43  | 12.60 | um00647 | -0.45 | 10.98 |
| 12c0006 | 0.04  | 10.98 | um00650 | -0.18 | 10.56 |
| 12c0006 | -0.06 | 8.75  | um00651 | 0.12  | 11.09 |
| 12c0006 | -0.10 | 11.84 | um00652 | -0.10 | 11.44 |
| 12c0006 | -0.10 | 11.45 | um00654 | -0.09 | 11.65 |
| 12c0006 | -0.38 | 10.53 | um00655 | -1.22 | 11.60 |
| 12c0006 | 0.20  | 12.32 | um00656 | -0.03 | 11.57 |
| 12c0006 | 0.12  | 8.64  | um00657 | 0.17  | 12.10 |

|         |       |       |         |       |       |
|---------|-------|-------|---------|-------|-------|
| 12c0007 | 0.08  | 9.92  | um00658 | 0.14  | 15.29 |
| 12c0007 | 0.07  | 8.97  | um00660 | -0.41 | 11.84 |
| 12c0007 | 0.29  | 13.14 | um00663 | -1.15 | 13.27 |
| 12c0007 | -0.32 | 13.69 | um00664 | -1.55 | 11.67 |
| 12c0007 | -0.06 | 10.96 | um00666 | 0.25  | 11.94 |
| 12c0007 | 0.55  | 12.69 | um00667 | 0.21  | 11.62 |
| 12c0007 | -0.70 | 13.51 | um00668 | -0.09 | 11.72 |
| 12c0007 | 0.08  | 11.83 | um00669 | 0.50  | 11.27 |
| 12c0007 | 0.51  | 11.84 | um00670 | 0.45  | 11.67 |
| 12c0007 | -0.19 | 9.61  | um00671 | -0.13 | 10.16 |
| 12c0008 | -0.13 | 10.96 | um00672 | -1.05 | 13.35 |
| 12c0008 | 0.19  | 10.73 | um00673 | -0.63 | 14.14 |
| 12c0008 | -0.09 | 13.11 | um00674 | -0.43 | 15.48 |
| 12c0008 | 0.36  | 13.59 | um00675 | -0.06 | 10.09 |
| 12c0008 | 0.01  | 8.84  | um00676 | -0.55 | 12.23 |
| 12c0008 | -0.08 | 11.49 | um00678 | -0.20 | 11.01 |
| 12c0008 | -0.13 | 8.59  | um00679 | -1.05 | 11.85 |
| 12c0008 | -0.06 | 8.64  | um00684 | 0.13  | 10.83 |
| 12c0008 | -0.05 | 8.53  | um00685 | 0.05  | 12.49 |
| 12c0008 | 0.41  | 11.72 | um00687 | 0.79  | 11.96 |
| 12c0009 | -0.46 | 13.09 | um00688 | -0.83 | 12.85 |
| 12c0009 | 0.04  | 13.05 | um00689 | 0.51  | 11.04 |
| 12c0009 | 0.09  | 10.12 | um00691 | 0.12  | 12.18 |
| 12c0009 | -0.03 | 9.61  | um00692 | -0.51 | 14.44 |
| 12c0009 | -1.25 | 13.45 | um00693 | -0.10 | 11.59 |
| 12c0009 | -0.03 | 11.81 | um00694 | 0.01  | 11.46 |
| 12c0009 | 0.34  | 9.88  | um00695 | -0.31 | 12.63 |
| 12c0009 | -0.17 | 12.85 | um00696 | 1.19  | 10.83 |
| 12c0009 | 0.17  | 13.22 | um00698 | -0.38 | 13.14 |
| 12c0009 | -0.84 | 12.36 | um00699 | 0.19  | 10.83 |
| 12c0010 | -0.51 | 14.77 | um00700 | 0.19  | 11.94 |
| 12c0010 | -0.18 | 14.48 | um00701 | -0.13 | 8.75  |
| 12c0010 | 0.28  | 13.09 | um00702 | 0.15  | 11.30 |
| 12c0010 | 0.14  | 12.17 | um00703 | 0.16  | 13.18 |
| 12c0010 | -0.17 | 11.46 | um00706 | -0.61 | 11.48 |
| 12c0010 | 0.16  | 12.91 | um00708 | 1.61  | 11.76 |
| 12c0010 | 0.34  | 13.20 | um00710 | -0.55 | 12.19 |
| 12c0010 | 0.11  | 9.99  | um00711 | 0.15  | 12.41 |
| 12c0010 | 1.30  | 14.10 | um00712 | 0.71  | 11.29 |
| 12c0010 | 0.07  | 10.77 | um00714 | -0.16 | 10.56 |
| 12c0011 | 0.24  | 10.43 | um00715 | -0.14 | 9.11  |
| 12c0011 | 0.29  | 13.36 | um00716 | 0.32  | 10.47 |
| 12c0011 | 0.78  | 11.70 | um00719 | 1.74  | 11.11 |
| 12c0011 | -0.49 | 11.18 | um00721 | -0.57 | 12.32 |
| 12c0011 | -0.67 | 11.27 | um00722 | 0.41  | 10.74 |
| 12c0011 | 0.60  | 13.79 | um00723 | 2.00  | 12.98 |
| 12c0011 | 0.26  | 11.44 | um00725 | 0.16  | 11.33 |
| 12c0011 | 0.10  | 10.64 | um00727 | -1.18 | 10.01 |
| 12c0011 | -0.07 | 12.99 | um00728 | 0.14  | 10.63 |
| 12c0011 | 0.12  | 12.65 | um00729 | -0.48 | 11.24 |
| 12c0012 | -0.90 | 13.13 | um00731 | -0.34 | 8.69  |
| 12c0012 | 0.50  | 12.32 | um00734 | -0.22 | 12.25 |
| 12c0012 | 0.04  | 13.20 | um00735 | 0.87  | 12.44 |
| 12c0012 | -0.45 | 14.50 | um00736 | -0.86 | 12.20 |

|         |       |       |         |       |       |
|---------|-------|-------|---------|-------|-------|
| 12c0012 | -0.04 | 12.30 | um00737 | -0.92 | 11.86 |
| 12c0012 | 0.36  | 12.82 | um00738 | -2.01 | 12.65 |
| 12c0012 | -0.10 | 14.89 | um00739 | -0.48 | 10.70 |
| 12c0012 | -0.11 | 14.54 | um00740 | 0.09  | 10.47 |
| 12c0012 | 0.20  | 10.36 | um00741 | 0.34  | 10.96 |
| 12c0012 | 0.06  | 11.78 | um00742 | 0.32  | 10.98 |
| 12c0013 | -0.08 | 8.71  | um00743 | 0.49  | 10.79 |
| 12c0013 | 0.15  | 12.01 | um00744 | -0.17 | 11.78 |
| 12c0013 | 0.33  | 12.88 | um00745 | 1.06  | 11.97 |
| 12c0013 | 0.51  | 13.31 | um00746 | -0.78 | 10.85 |
| 12c0013 | -0.31 | 12.55 | um00747 | 1.00  | 13.31 |
| 12c0013 | 0.10  | 8.89  | um00748 | -0.22 | 12.27 |
| 12c0013 | -0.01 | 15.86 | um00749 | -0.21 | 8.50  |
| 12c0013 | 0.56  | 11.48 | um00750 | -0.38 | 15.85 |
| 12c0013 | -0.07 | 11.87 | um00751 | 1.02  | 11.83 |
| 12c0013 | -0.65 | 12.22 | um00752 | 0.68  | 12.62 |
| 12c0014 | -0.35 | 12.34 | um00753 | -0.33 | 14.47 |
| 12c0014 | 0.40  | 12.54 | um00754 | -0.23 | 13.05 |
| 12c0014 | -0.21 | 12.78 | um00755 | 0.15  | 11.76 |
| 12c0014 | -0.08 | 10.18 | um00756 | -0.46 | 11.09 |
| 12c0014 | -0.42 | 9.11  | um00757 | -0.19 | 8.53  |
| 12c0014 | -0.56 | 9.32  | um00758 | 0.19  | 11.43 |
| 12c0014 | -0.51 | 9.40  | um00759 | -0.50 | 10.89 |
| 12c0014 | 0.49  | 11.54 | um00760 | -0.21 | 11.19 |
| 12d0000 | -0.93 | 12.20 | um00761 | -0.44 | 12.72 |
| 12d0000 | 0.55  | 10.56 | um00762 | 0.17  | 10.84 |
| 12d0000 | -0.97 | 14.56 | um00763 | -0.63 | 12.43 |
| 12d0000 | -0.58 | 11.31 | um00764 | 0.23  | 10.07 |
| 12d0000 | -0.66 | 11.03 | um00765 | -0.72 | 11.56 |
| 12d0000 | -0.60 | 10.52 | um00766 | 0.06  | 14.00 |
| 12d0000 | -0.28 | 9.35  | um00767 | -0.21 | 11.54 |
| 12d0000 | -0.10 | 12.81 | um00768 | 0.77  | 10.55 |
| 12d0000 | -0.18 | 12.34 | um00769 | 0.42  | 10.79 |
| 12d0001 | -0.38 | 12.91 | um00770 | -0.14 | 14.08 |
| 12d0001 | 1.01  | 13.07 | um00771 | 0.11  | 11.65 |
| 12d0001 | 0.80  | 13.82 | um00772 | 0.61  | 10.83 |
| 12d0001 | 1.25  | 13.97 | um00773 | 0.21  | 9.04  |
| 12d0001 | 0.14  | 14.13 | um00774 | -0.94 | 9.45  |
| 12d0001 | -0.16 | 12.59 | um00775 | -0.95 | 13.02 |
| 12d0001 | -1.12 | 13.02 | um00776 | -0.13 | 12.15 |
| 12d0001 | 0.00  | 13.77 | um00777 | 0.58  | 10.44 |
| 12d0001 | 0.17  | 12.49 | um00778 | 0.18  | 10.34 |
| 12d0001 | 0.09  | 10.15 | um00779 | -0.11 | 10.28 |
| 12d0002 | -0.36 | 13.25 | um00780 | 0.70  | 12.92 |
| 12d0002 | -0.06 | 10.47 | um00781 | -0.68 | 12.84 |
| 12d0002 | -0.08 | 10.47 | um00782 | -0.06 | 8.84  |
| 12d0002 | -0.11 | 14.05 | um00783 | 0.15  | 8.85  |
| 12d0002 | 0.16  | 9.82  | um00784 | -0.28 | 8.83  |
| 12d0002 | 0.30  | 11.86 | um00785 | -0.54 | 9.50  |
| 12d0002 | -0.44 | 10.53 | um00786 | -0.55 | 11.35 |
| 12d0002 | -0.09 | 11.61 | um00787 | -1.20 | 13.54 |
| 12d0002 | -0.04 | 8.68  | um00788 | 0.15  | 10.54 |
| 12d0002 | -0.03 | 12.66 | um00789 | 0.35  | 9.48  |
| 12d0003 | -0.50 | 11.31 | um00800 | -0.29 | 12.38 |

|         |       |       |         |       |       |
|---------|-------|-------|---------|-------|-------|
| 12d0003 | 0.10  | 11.25 | um00802 | 0.30  | 11.15 |
| 12d0003 | 0.26  | 13.64 | um00805 | 0.54  | 10.93 |
| 12d0003 | 0.31  | 11.64 | um00806 | -0.26 | 11.19 |
| 12d0003 | -0.27 | 14.15 | um00808 | 0.09  | 10.80 |
| 12d0003 | -0.94 | 13.77 | um00810 | -0.29 | 9.70  |
| 12d0003 | 0.21  | 12.59 | um00811 | 0.45  | 12.17 |
| 12d0003 | 0.12  | 12.51 | um00812 | -0.43 | 12.30 |
| 12d0003 | 0.18  | 13.31 | um00813 | -1.60 | 11.74 |
| 12d0003 | 0.14  | 11.57 | um00815 | 3.02  | 12.55 |
| 12d0004 | 0.56  | 13.12 | um00816 | -0.60 | 15.78 |
| 12d0004 | -0.36 | 12.85 | um00817 | 0.37  | 11.24 |
| 12d0004 | 0.00  | 9.86  | um00820 | -0.02 | 8.90  |
| 12d0004 | 0.08  | 11.34 | um00821 | -0.29 | 8.74  |
| 12d0004 | -0.52 | 12.15 | um00822 | -0.10 | 8.40  |
| 12d0004 | -0.19 | 13.37 | um00823 | 0.06  | 12.71 |
| 12d0004 | -0.02 | 10.54 | um00824 | 2.65  | 12.85 |
| 12d0004 | -0.14 | 9.86  | um00825 | 1.58  | 11.24 |
| 12d0004 | 0.31  | 14.80 | um00827 | -0.60 | 10.28 |
| 12d0004 | 0.17  | 11.96 | um00829 | -0.31 | 15.70 |
| 12d0005 | 0.10  | 10.71 | um00830 | 0.79  | 11.83 |
| 12d0005 | -0.17 | 13.09 | um00831 | -0.32 | 15.76 |
| 12d0005 | -0.20 | 10.30 | um00832 | -0.34 | 11.76 |
| 12d0005 | 0.13  | 11.14 | um00833 | 0.53  | 13.80 |
| 12d0005 | 0.20  | 11.15 | um00835 | -0.18 | 10.78 |
| 12d0005 | 0.01  | 13.12 | um00836 | 0.07  | 10.71 |
| 12d0005 | -0.38 | 12.41 | um00837 | -0.09 | 9.41  |
| 12d0005 | -0.03 | 12.19 | um00840 | 0.41  | 10.47 |
| 12d0005 | -0.09 | 12.46 | um00841 | 2.47  | 11.63 |
| 12d0005 | 0.38  | 11.32 | um00842 | 3.93  | 12.61 |
| 12d0006 | 0.02  | 12.10 | um00844 | 2.17  | 13.12 |
| 12d0006 | 0.12  | 11.71 | um00847 | 0.02  | 11.37 |
| 12d0006 | 0.08  | 9.31  | um00848 | 0.31  | 12.49 |
| 12d0006 | 0.08  | 8.69  | um00851 | -0.16 | 13.26 |
| 12d0006 | 0.12  | 13.12 | um00855 | -0.31 | 12.83 |
| 12d0006 | 0.01  | 11.40 | um00857 | -0.08 | 11.78 |
| 12d0006 | -0.53 | 11.21 | um00858 | 0.01  | 8.80  |
| 12d0006 | -0.35 | 11.31 | um00859 | 1.02  | 11.56 |
| 12d0006 | 0.03  | 9.05  | um00861 | -0.28 | 11.84 |
| 12d0006 | 0.39  | 13.34 | um00862 | 0.08  | 15.12 |
| 12d0007 | 0.50  | 10.72 | um00864 | -0.77 | 12.34 |
| 12d0007 | 0.01  | 11.00 | um00866 | -1.08 | 12.97 |
| 12d0007 | -0.31 | 12.94 | um00867 | 0.31  | 14.59 |
| 12d0007 | -0.11 | 10.81 | um00869 | 0.76  | 11.95 |
| 12d0007 | -0.12 | 13.34 | um00871 | 0.13  | 11.12 |
| 12d0007 | 0.43  | 13.75 | um00872 | -0.34 | 11.73 |
| 12d0007 | -0.05 | 12.25 | um00874 | 0.04  | 8.85  |
| 12d0007 | -0.34 | 14.61 | um00875 | 0.52  | 9.01  |
| 12d0007 | 0.14  | 14.74 | um00876 | -4.60 | 11.80 |
| 12d0007 | -0.03 | 8.70  | um00878 | 0.52  | 11.49 |
| 12d0008 | 0.10  | 12.15 | um00879 | 0.10  | 11.19 |
| 12d0008 | 0.78  | 13.29 | um00880 | 0.03  | 12.08 |
| 12d0008 | 0.72  | 14.55 | um00882 | -0.04 | 10.72 |
| 12d0008 | -0.03 | 9.15  | um00883 | 0.58  | 11.34 |
| 12d0008 | -0.59 | 12.13 | um00884 | 0.51  | 12.15 |

|         |       |       |         |       |       |
|---------|-------|-------|---------|-------|-------|
| 12d0008 | 0.17  | 9.82  | um00885 | -0.28 | 8.87  |
| 12d0008 | -0.56 | 13.25 | um00886 | -0.62 | 10.63 |
| 12d0008 | -0.30 | 12.50 | um00887 | -0.20 | 12.45 |
| 12d0008 | -0.22 | 11.29 | um00890 | -0.25 | 12.25 |
| 12d0008 | 0.20  | 10.94 | um00891 | 0.01  | 8.94  |
| 12d0009 | 0.24  | 12.26 | um00893 | 0.41  | 12.27 |
| 12d0009 | -0.23 | 9.29  | um00894 | 0.20  | 10.89 |
| 12d0009 | -0.54 | 11.57 | um00895 | -0.13 | 10.68 |
| 12d0009 | -0.15 | 10.74 | um00896 | -0.63 | 9.48  |
| 12d0009 | -0.20 | 9.24  | um00897 | -0.78 | 11.54 |
| 12d0009 | -0.01 | 8.47  | um00898 | -0.38 | 12.21 |
| 12d0009 | 0.09  | 8.60  | um00902 | 1.48  | 12.03 |
| 12d0009 | 0.57  | 12.32 | um00903 | 0.36  | 10.80 |
| 12d0009 | -0.13 | 8.64  | um00904 | -0.37 | 12.94 |
| 12d0009 | -0.02 | 8.98  | um00906 | 0.19  | 12.78 |
| 12d0010 | -0.05 | 11.77 | um00907 | 0.28  | 12.03 |
| 12d0010 | 0.04  | 9.82  | um00908 | -0.25 | 12.50 |
| 12d0010 | 0.17  | 9.60  | um00909 | 0.01  | 11.58 |
| 12d0010 | 0.03  | 8.86  | um00911 | -0.24 | 10.62 |
| 12d0010 | 0.00  | 12.52 | um00912 | 0.07  | 11.09 |
| 12d0010 | -0.73 | 13.41 | um00913 | -1.50 | 13.28 |
| 12d0010 | -0.24 | 9.98  | um00915 | 0.05  | 12.13 |
| 12d0010 | -0.01 | 8.91  | um00916 | 0.55  | 11.49 |
| 12d0010 | -0.47 | 10.73 | um00919 | -0.57 | 15.98 |
| 12d0010 | -0.66 | 12.82 | um00920 | -0.65 | 11.03 |
| 12d0011 | 0.32  | 12.85 | um00921 | 0.12  | 10.45 |
| 12d0011 | -0.06 | 12.35 | um00922 | 0.60  | 11.25 |
| 12d0011 | 0.31  | 12.66 | um00923 | -0.13 | 13.06 |
| 12d0011 | -0.01 | 11.49 | um00924 | -0.61 | 15.95 |
| 12d0011 | 0.09  | 12.19 | um00926 | 0.13  | 14.93 |
| 12d0011 | 0.43  | 11.95 | um00927 | 0.10  | 10.61 |
| 12d0011 | 0.39  | 11.95 | um00928 | 0.62  | 11.85 |
| 12d0011 | 0.15  | 9.03  | um00929 | 0.43  | 12.36 |
| 12d0011 | -0.19 | 10.59 | um00930 | 0.22  | 11.25 |
| 12d0011 | -0.03 | 12.83 | um00931 | 0.16  | 10.29 |
| 12d0012 | -0.16 | 11.42 | um00933 | -0.51 | 12.79 |
| 12d0012 | 0.22  | 12.27 | um00934 | -1.29 | 14.52 |
| 12d0012 | 0.07  | 12.68 | um00935 | 0.80  | 12.73 |
| 12d0012 | -0.09 | 8.99  | um00936 | 0.03  | 12.85 |
| 12d0012 | 0.03  | 8.62  | um00937 | 0.21  | 12.08 |
| 12d0012 | 0.42  | 11.77 | um00940 | 0.22  | 14.07 |
| 12d0012 | -0.13 | 12.23 | um00945 | -1.25 | 13.67 |
| 12d0012 | 0.11  | 11.61 | um00946 | 1.03  | 13.82 |
| 12d0012 | -0.02 | 8.93  | um00947 | 0.20  | 12.26 |
| 12d0012 | -0.04 | 9.06  | um00948 | 0.31  | 11.13 |
| 12d0013 | -0.24 | 10.40 | um00949 | 0.43  | 12.69 |
| 12d0013 | -0.15 | 14.15 | um00950 | -0.09 | 11.84 |
| 12d0013 | 0.01  | 9.54  | um00952 | 0.18  | 11.81 |
| 12d0013 | -0.73 | 14.04 | um00955 | -1.91 | 14.10 |
| 12d0013 | -0.53 | 12.85 | um00956 | 0.10  | 12.00 |
| 12d0013 | 0.59  | 12.01 | um00957 | 0.11  | 12.23 |
| 12d0013 | 0.14  | 11.84 | um00958 | 0.53  | 11.74 |
| 12d0013 | -0.10 | 10.05 | um00961 | -0.61 | 15.59 |
| 12d0013 | -0.45 | 12.45 | um00963 | 0.55  | 10.73 |

|         |       |       |         |       |       |
|---------|-------|-------|---------|-------|-------|
| 12d0013 | -0.16 | 11.40 | um00964 | 0.08  | 11.17 |
| 12d0014 | 0.06  | 8.80  | um00965 | 0.62  | 11.30 |
| 12d0014 | -0.33 | 11.09 | um00966 | 0.32  | 10.93 |
| 13c0000 | -0.13 | 8.57  | um00967 | -0.56 | 15.80 |
| 13c0000 | -0.24 | 12.19 | um00968 | 2.94  | 11.04 |
| 13c0000 | 0.17  | 12.97 | um00970 | 1.64  | 12.05 |
| 13c0000 | -0.70 | 12.89 | um00971 | 0.49  | 11.43 |
| 13c0000 | 0.29  | 10.34 | um00975 | -0.28 | 14.24 |
| 13c0000 | 0.09  | 9.32  | um00978 | 0.11  | 12.04 |
| 13c0000 | 0.07  | 11.09 | um00980 | -0.29 | 13.33 |
| 13c0000 | 0.37  | 10.24 | um00981 | 0.09  | 11.18 |
| 13c0000 | -0.04 | 12.08 | um00982 | -0.45 | 15.11 |
| 13c0001 | -0.10 | 8.88  | um00983 | -0.23 | 11.28 |
| 13c0001 | 0.05  | 11.85 | um00984 | -0.71 | 12.37 |
| 13c0001 | -0.14 | 11.97 | um00985 | -1.00 | 11.43 |
| 13c0001 | -0.29 | 11.67 | um00986 | 0.14  | 13.69 |
| 13c0001 | 0.48  | 12.50 | um00987 | -0.05 | 12.38 |
| 13c0001 | 0.41  | 12.90 | um00988 | 0.25  | 11.75 |
| 13c0001 | 0.05  | 10.63 | um00989 | 0.50  | 11.36 |
| 13c0001 | 0.30  | 12.06 | um00990 | -0.22 | 11.44 |
| 13c0001 | 0.52  | 12.52 | um00991 | -0.17 | 12.60 |
| 13c0001 | 0.44  | 11.05 | um00992 | 1.19  | 13.58 |
| 13c0002 | -3.02 | 12.24 | um00995 | -0.39 | 11.15 |
| 13c0002 | -0.26 | 11.52 | um00996 | -0.31 | 12.07 |
| 13c0002 | -0.66 | 13.02 | um00997 | 0.09  | 12.07 |
| 13c0002 | 0.38  | 13.00 | um00998 | 0.93  | 11.19 |
| 13c0002 | 0.11  | 10.87 | um01001 | -0.01 | 10.65 |
| 13c0002 | 0.63  | 14.34 | um01004 | -0.53 | 11.29 |
| 13c0002 | -0.44 | 15.67 | um01005 | -1.34 | 14.60 |
| 13c0002 | -0.95 | 11.72 | um01006 | -0.26 | 13.84 |
| 13c0002 | 0.02  | 11.27 | um01008 | 0.11  | 10.36 |
| 13c0002 | -0.15 | 12.07 | um01009 | 0.16  | 13.03 |
| 13c0003 | 0.09  | 11.52 | um01010 | -0.26 | 11.75 |
| 13c0003 | -0.01 | 13.03 | um01011 | -0.38 | 10.87 |
| 13c0003 | 0.12  | 12.51 | um01012 | -0.53 | 11.52 |
| 13c0003 | -0.13 | 10.34 | um01013 | -0.02 | 12.33 |
| 13c0003 | 0.28  | 14.38 | um01014 | -0.81 | 14.25 |
| 13c0003 | 0.55  | 14.37 | um01016 | 0.64  | 10.12 |
| 13c0003 | 0.01  | 11.84 | um01017 | -0.19 | 11.69 |
| 13c0003 | -1.24 | 15.26 | um01018 | 0.07  | 15.04 |
| 13c0003 | -0.54 | 10.95 | um01021 | -0.15 | 11.57 |
| 13c0003 | 0.32  | 13.05 | um01022 | -0.27 | 13.35 |
| 13c0004 | 0.25  | 10.64 | um01023 | -0.39 | 12.59 |
| 13c0004 | -0.17 | 13.43 | um01024 | -0.26 | 8.63  |
| 13c0004 | -0.43 | 11.32 | um01025 | -1.32 | 10.05 |
| 13c0004 | -0.73 | 12.42 | um01026 | 0.27  | 11.83 |
| 13c0004 | -0.24 | 11.75 | um01027 | 0.29  | 11.18 |
| 13c0004 | -0.20 | 10.20 | um01030 | 0.46  | 11.74 |
| 13c0004 | -0.13 | 8.50  | um01031 | -0.15 | 11.99 |
| 13c0004 | -1.41 | 13.53 | um01032 | -0.10 | 12.67 |
| 13c0004 | -0.43 | 11.64 | um01033 | -0.44 | 11.81 |
| 13c0004 | -0.10 | 12.39 | um01037 | 0.74  | 12.40 |
| 13c0005 | 0.01  | 12.15 | um01038 | 0.53  | 12.33 |
| 13c0005 | 0.04  | 13.69 | um01040 | 0.07  | 13.18 |

|         |       |       |         |       |       |
|---------|-------|-------|---------|-------|-------|
| 13c0005 | 0.35  | 13.37 | um01041 | 0.01  | 8.72  |
| 13c0005 | 0.17  | 13.09 | um01042 | -0.05 | 11.23 |
| 13c0005 | 0.70  | 13.06 | um01045 | -0.15 | 12.23 |
| 13c0005 | 0.22  | 15.16 | um01047 | -0.12 | 8.78  |
| 13c0005 | 0.45  | 12.92 | um01048 | -0.66 | 12.66 |
| 13c0005 | 0.29  | 11.43 | um01049 | -0.02 | 14.01 |
| 13c0005 | 0.61  | 14.12 | um01050 | -0.59 | 11.32 |
| 13c0005 | -0.02 | 12.66 | um01051 | -0.78 | 11.56 |
| 13c0006 | 0.36  | 14.41 | um01052 | -5.14 | 13.15 |
| 13c0006 | 0.01  | 10.88 | um01053 | -0.15 | 8.45  |
| 13c0006 | 0.39  | 13.15 | um01054 | -0.76 | 14.16 |
| 13c0006 | 0.12  | 11.49 | um01055 | 0.08  | 13.66 |
| 13c0006 | 0.32  | 10.21 | um01058 | 0.18  | 11.52 |
| 13c0006 | 0.43  | 12.07 | um01059 | -0.18 | 11.88 |
| 13c0006 | 0.04  | 11.01 | um01060 | 0.03  | 15.13 |
| 13c0006 | 0.55  | 12.06 | um01061 | -0.03 | 11.38 |
| 13c0006 | 0.10  | 14.43 | um01062 | -0.68 | 12.82 |
| 13c0006 | 0.00  | 11.99 | um01063 | 0.24  | 14.63 |
| 13c0007 | -0.71 | 10.97 | um01064 | -0.06 | 11.62 |
| 13c0007 | 0.14  | 12.06 | um01065 | 1.06  | 10.87 |
| 13c0007 | -0.26 | 12.47 | um01067 | 0.09  | 12.27 |
| 13c0007 | 0.34  | 9.08  | um01070 | -1.05 | 13.57 |
| 13c0007 | 0.27  | 11.99 | um01072 | 0.19  | 12.27 |
| 13c0007 | -0.28 | 12.70 | um01073 | -0.45 | 9.64  |
| 13c0007 | 0.16  | 10.09 | um01074 | 0.33  | 11.17 |
| 13c0007 | -0.13 | 8.59  | um01075 | -0.40 | 11.62 |
| 13c0007 | -1.05 | 11.67 | um01076 | 0.25  | 11.65 |
| 13c0007 | -0.54 | 14.15 | um01077 | 0.20  | 13.94 |
| 13c0008 | 0.28  | 13.34 | um01079 | 0.05  | 9.43  |
| 13c0008 | 0.26  | 12.99 | um01080 | 0.03  | 11.64 |
| 13c0008 | 0.55  | 11.07 | um01081 | 0.06  | 11.64 |
| 13c0008 | -1.18 | 12.64 | um01082 | 1.32  | 13.77 |
| 13c0008 | -0.68 | 13.22 | um01083 | 0.20  | 10.69 |
| 13c0008 | -0.47 | 10.19 | um01084 | 0.29  | 12.45 |
| 13c0008 | 0.12  | 10.82 | um01085 | 0.83  | 11.31 |
| 13c0008 | 0.19  | 10.71 | um01087 | 0.16  | 12.50 |
| 13c0008 | 0.41  | 13.27 | um01088 | -0.71 | 11.94 |
| 13c0008 | 0.24  | 11.50 | um01089 | -0.14 | 11.26 |
| 13c0009 | 0.14  | 9.66  | um01090 | 1.52  | 13.43 |
| 13c0009 | -0.05 | 12.65 | um01091 | 0.39  | 10.86 |
| 13c0009 | -0.10 | 8.61  | um01092 | 0.33  | 10.43 |
| 13c0009 | -0.33 | 8.86  | um01093 | 0.32  | 12.40 |
| 13c0009 | -0.22 | 11.97 | um01094 | -0.12 | 12.28 |
| 13c0009 | -1.16 | 14.62 | um01096 | -0.01 | 13.20 |
| 13c0009 | 0.61  | 12.89 | um01099 | -0.28 | 13.73 |
| 13c0009 | -0.39 | 12.38 | um01100 | 0.48  | 10.99 |
| 13c0009 | -0.29 | 13.08 | um01101 | 0.37  | 12.04 |
| 13c0009 | 0.18  | 11.53 | um01102 | 0.30  | 10.79 |
| 13c0010 | -0.32 | 12.49 | um01103 | -0.30 | 14.99 |
| 13c0010 | -0.28 | 12.34 | um01104 | 0.11  | 11.06 |
| 13c0010 | -0.15 | 13.70 | um01105 | -0.30 | 12.98 |
| 13c0010 | -0.38 | 10.11 | um01107 | 0.10  | 11.54 |
| 13c0010 | -0.02 | 12.04 | um01110 | -0.78 | 11.83 |
| 13c0010 | 0.05  | 12.01 | um01111 | -0.44 | 10.73 |

|         |       |       |         |       |       |
|---------|-------|-------|---------|-------|-------|
| 13c0010 | -0.13 | 9.68  | um01112 | 0.80  | 10.57 |
| 13c0010 | 0.31  | 10.74 | um01113 | 0.10  | 10.72 |
| 13c0010 | 0.13  | 9.73  | um01114 | 0.68  | 13.26 |
| 13c0010 | -0.15 | 12.47 | um01115 | 0.62  | 11.86 |
| 13c0011 | 0.10  | 9.80  | um01116 | -0.40 | 12.49 |
| 13c0011 | -0.11 | 15.27 | um01117 | 0.26  | 11.79 |
| 13d0000 | -2.11 | 12.21 | um01118 | -0.27 | 8.40  |
| 13d0000 | 0.14  | 11.49 | um01120 | 0.16  | 10.30 |
| 13d0000 | -0.86 | 12.12 | um01121 | 0.22  | 13.01 |
| 13d0000 | -0.59 | 12.22 | um01122 | 0.73  | 11.86 |
| 13d0000 | 0.06  | 10.36 | um01123 | -0.15 | 11.61 |
| 13d0000 | -0.53 | 11.23 | um01125 | -0.10 | 8.40  |
| 13d0000 | 0.09  | 13.86 | um01126 | -0.17 | 11.56 |
| 13d0000 | 0.09  | 12.87 | um01128 | 0.53  | 10.79 |
| 13d0000 | -0.23 | 12.45 | um01129 | -0.19 | 11.22 |
| 13d0001 | -0.44 | 12.08 | um01130 | -0.83 | 9.57  |
| 13d0001 | -0.19 | 11.95 | um01131 | 0.33  | 11.74 |
| 13d0001 | -0.03 | 8.70  | um01132 | -0.27 | 8.64  |
| 13d0001 | 0.01  | 8.67  | um01133 | -0.11 | 11.02 |
| 13d0001 | -0.84 | 12.74 | um01134 | 0.96  | 11.60 |
| 13d0001 | 0.42  | 12.99 | um01135 | 0.98  | 10.27 |
| 13d0001 | 0.41  | 12.26 | um01136 | -1.00 | 11.65 |
| 13d0001 | -0.22 | 11.94 | um01138 | -0.44 | 10.31 |
| 13d0001 | -0.06 | 13.37 | um01139 | 0.48  | 11.27 |
| 13d0001 | 0.06  | 10.20 | um01141 | -0.77 | 11.84 |
| 13d0002 | -0.54 | 12.45 | um01142 | -0.78 | 12.08 |
| 13d0002 | 0.23  | 12.67 | um01143 | -1.01 | 15.60 |
| 13d0002 | 0.02  | 12.64 | um01144 | 0.53  | 11.05 |
| 13d0002 | 0.40  | 11.26 | um01145 | -0.15 | 8.75  |
| 13d0002 | 0.29  | 12.73 | um01146 | 0.05  | 12.22 |
| 13d0002 | 0.33  | 9.90  | um01148 | 0.04  | 11.68 |
| 13d0002 | 0.38  | 13.19 | um01149 | -0.31 | 13.09 |
| 13d0002 | 0.30  | 12.42 | um01150 | -0.13 | 15.18 |
| 13d0002 | 0.16  | 10.48 | um01152 | 0.24  | 10.86 |
| 13d0002 | -0.22 | 13.39 | um01153 | -0.23 | 10.85 |
| 13d0003 | -0.28 | 13.08 | um01154 | -0.11 | 13.28 |
| 13d0003 | 0.54  | 13.45 | um01156 | 0.24  | 12.19 |
| 13d0003 | 0.64  | 13.99 | um01159 | 0.22  | 12.01 |
| 13d0003 | -0.24 | 12.10 | um01161 | 0.19  | 12.67 |
| 13d0003 | -0.30 | 11.20 | um01162 | -0.45 | 11.74 |
| 13d0003 | 0.53  | 12.35 | um01163 | -0.96 | 11.96 |
| 13d0003 | -0.59 | 12.62 | um01164 | 0.92  | 10.70 |
| 13d0003 | -0.02 | 11.70 | um01165 | -3.03 | 11.15 |
| 13d0003 | -0.29 | 10.39 | um01166 | -0.24 | 11.36 |
| 13d0003 | 0.03  | 11.93 | um01167 | -0.02 | 11.43 |
| 13d0004 | 0.51  | 13.61 | um01168 | -0.49 | 12.01 |
| 13d0004 | 0.53  | 11.76 | um01169 | -0.25 | 12.73 |
| 13d0004 | 0.10  | 12.25 | um01170 | -0.37 | 11.08 |
| 13d0004 | -0.51 | 11.94 | um01171 | 1.92  | 13.44 |
| 13d0004 | 0.39  | 10.67 | um01172 | 0.91  | 13.15 |
| 13d0004 | 0.10  | 8.52  | um01173 | 0.49  | 11.10 |
| 13d0004 | -0.59 | 13.66 | um01174 | 0.31  | 11.70 |
| 13d0004 | -0.03 | 11.89 | um01175 | 0.16  | 11.22 |
| 13d0004 | 0.43  | 12.45 | um01176 | -0.03 | 11.98 |



|         |       |       |         |       |       |
|---------|-------|-------|---------|-------|-------|
| 13d0004 | 0.05  | 12.18 | um01177 | 0.07  | 11.55 |
| 13d0005 | 0.02  | 11.03 | um01178 | -0.07 | 11.95 |
| 13d0005 | -0.16 | 12.19 | um01179 | 0.92  | 11.71 |
| 13d0005 | -0.49 | 11.23 | um01180 | 0.15  | 12.54 |
| 13d0005 | -0.20 | 14.86 | um01181 | 0.32  | 12.50 |
| 13d0005 | 0.24  | 13.53 | um01182 | 2.21  | 12.26 |
| 13d0005 | 0.05  | 11.33 | um01184 | 0.56  | 12.70 |
| 13d0005 | 0.24  | 14.95 | um01185 | 0.36  | 12.11 |
| 13d0005 | -0.17 | 10.54 | um01186 | -0.50 | 13.00 |
| 13d0005 | 0.09  | 11.59 | um01187 | -4.47 | 11.73 |
| 13d0005 | 0.41  | 12.43 | um01189 | -0.57 | 15.76 |
| 13d0006 | 0.15  | 12.39 | um01190 | 0.47  | 11.07 |
| 13d0006 | -1.05 | 14.32 | um01191 | 0.57  | 11.70 |
| 13d0006 | 0.53  | 11.99 | um01192 | 1.55  | 11.93 |
| 13d0006 | 0.55  | 12.76 | um01194 | -0.69 | 12.96 |
| 13d0006 | -0.31 | 11.96 | um01195 | -0.38 | 12.28 |
| 13d0006 | 0.16  | 10.95 | um01196 | 0.24  | 12.02 |
| 13d0006 | -0.06 | 10.16 | um01197 | 0.14  | 11.58 |
| 13d0006 | 0.06  | 10.84 | um01198 | -0.41 | 10.98 |
| 13d0006 | 0.00  | 12.66 | um01200 | 0.42  | 10.26 |
| 13d0006 | 0.18  | 13.45 | um01201 | 0.08  | 10.46 |
| 13d0007 | 0.18  | 12.89 | um01202 | 0.02  | 10.67 |
| 13d0007 | 0.03  | 8.69  | um01204 | 1.22  | 9.49  |
| 13d0007 | -0.98 | 13.45 | um01205 | -0.93 | 14.19 |
| 13d0007 | 0.64  | 11.50 | um01206 | -0.36 | 11.24 |
| 13d0007 | 0.25  | 11.90 | um01207 | 0.45  | 12.45 |
| 13d0007 | 0.03  | 13.15 | um01208 | 0.25  | 13.19 |
| 13d0007 | -0.01 | 11.90 | um01209 | -0.80 | 13.25 |
| 13d0007 | -0.02 | 11.46 | um01210 | 0.22  | 11.86 |
| 13d0007 | 0.14  | 11.95 | um01211 | -0.42 | 10.97 |
| 13d0007 | -0.14 | 14.37 | um01212 | 1.73  | 12.69 |
| 13d0008 | -0.05 | 8.98  | um01213 | -1.74 | 12.32 |
| 13d0008 | 0.76  | 12.16 | um01214 | -0.42 | 9.02  |
| 13d0008 | -0.01 | 11.25 | um01215 | 0.15  | 11.65 |
| 13d0008 | -0.09 | 8.63  | um01216 | 0.37  | 12.10 |
| 13d0008 | -0.14 | 8.58  | um01217 | -0.24 | 8.53  |
| 13d0008 | -0.09 | 8.66  | um01219 | 0.04  | 10.95 |
| 13d0008 | -0.40 | 11.56 | um01220 | -0.46 | 13.30 |
| 13d0008 | -1.34 | 12.00 | um01221 | -0.47 | 15.88 |
| 13d0008 | 0.28  | 12.18 | um01222 | 0.24  | 11.47 |
| 13d0008 | -0.56 | 11.80 | um01224 | 0.99  | 12.16 |
| 13d0009 | 0.21  | 13.96 | um01226 | -0.16 | 8.74  |
| 13d0009 | -0.83 | 11.86 | um01227 | 0.08  | 11.41 |
| 13d0009 | 0.53  | 12.80 | um01228 | 0.53  | 12.48 |
| 13d0009 | 0.54  | 15.15 | um01229 | -0.25 | 11.83 |
| 13d0009 | -0.08 | 14.10 | um01230 | -0.29 | 11.39 |
| 13d0009 | -0.36 | 10.94 | um01231 | -0.34 | 12.11 |
| 13d0009 | -1.54 | 11.94 | um01232 | -1.72 | 13.28 |
| 13d0009 | 0.54  | 12.38 | um01233 | -1.02 | 13.44 |
| 13d0009 | 0.67  | 11.34 | um01234 | -0.19 | 8.83  |
| 13d0009 | -2.45 | 13.20 | um01235 | -0.26 | 8.59  |
| 13d0010 | 0.20  | 11.10 | um01236 | -0.13 | 8.70  |
| 13d0010 | 0.17  | 12.35 | um01237 | -0.60 | 9.08  |
| 13d0010 | -0.49 | 13.03 | um01238 | -0.34 | 8.47  |

|         |       |       |         |       |       |
|---------|-------|-------|---------|-------|-------|
| 13d0010 | 0.34  | 13.60 | um01239 | -0.09 | 8.61  |
| 13d0010 | -0.18 | 12.60 | um01240 | -0.25 | 8.62  |
| 13d0010 | 0.11  | 10.77 | um01241 | -0.31 | 8.57  |
| 13d0010 | -0.14 | 9.62  | um01242 | 0.07  | 11.81 |
| 13d0010 | -0.01 | 14.11 | um01243 | 0.61  | 11.87 |
| 13d0010 | 0.03  | 9.16  | um01244 | 0.13  | 11.94 |
| 13d0010 | 0.24  | 11.07 | um01245 | -0.31 | 13.89 |
| 13d0011 | 0.48  | 13.25 | um01246 | 0.38  | 12.23 |
| 13d0011 | -0.32 | 13.64 | um01249 | -0.09 | 12.37 |
| 14c0000 | -0.80 | 11.27 | um01250 | 0.83  | 12.97 |
| 14c0000 | 0.71  | 10.46 | um01251 | 0.50  | 12.06 |
| 14c0000 | -0.42 | 9.12  | um01252 | -0.24 | 11.72 |
| 14c0000 | -1.10 | 9.81  | um01257 | 0.54  | 13.54 |
| 14c0000 | -1.20 | 13.02 | um01258 | -0.84 | 11.22 |
| 14c0000 | -0.12 | 10.88 | um01262 | -0.16 | 9.40  |
| 14c0000 | 0.42  | 11.35 | um01264 | -0.45 | 10.72 |
| 14c0000 | 0.07  | 10.46 | um01265 | 0.68  | 11.13 |
| 14c0000 | -0.16 | 13.47 | um01266 | 0.00  | 12.13 |
| 14c0001 | 0.24  | 14.41 | um01267 | 0.30  | 11.89 |
| 14c0001 | -0.02 | 13.43 | um01269 | 0.24  | 14.27 |
| 14c0001 | -0.41 | 11.92 | um01270 | 0.04  | 11.87 |
| 14c0001 | -0.35 | 10.61 | um01271 | -0.05 | 10.36 |
| 14c0001 | 0.10  | 13.34 | um01273 | 0.22  | 11.11 |
| 14c0001 | 0.52  | 11.73 | um01274 | -0.24 | 11.09 |
| 14c0001 | 0.06  | 9.65  | um01275 | -0.16 | 12.99 |
| 14c0001 | -0.09 | 12.73 | um01278 | 0.21  | 11.69 |
| 14c0001 | 0.31  | 12.51 | um01279 | -0.51 | 12.36 |
| 14c0001 | 0.03  | 11.48 | um01281 | -0.33 | 13.65 |
| 14c0002 | -0.15 | 13.57 | um01282 | -0.62 | 11.60 |
| 14c0002 | -0.19 | 12.32 | um01284 | 0.29  | 12.53 |
| 14c0002 | -0.28 | 12.54 | um01285 | -0.14 | 11.74 |
| 14c0002 | 0.08  | 12.71 | um01286 | 0.05  | 13.08 |
| 14c0002 | 0.06  | 11.21 | um01287 | -0.35 | 8.67  |
| 14c0002 | -0.29 | 11.79 | um01289 | -0.97 | 9.16  |
| 14c0002 | 0.04  | 12.02 | um01292 | 1.06  | 12.08 |
| 14c0002 | -0.22 | 11.00 | um01293 | 0.82  | 11.83 |
| 14c0002 | -0.08 | 10.24 | um01295 | 0.49  | 11.44 |
| 14c0002 | -0.24 | 13.51 | um01296 | 0.23  | 10.35 |
| 14c0003 | 0.23  | 12.28 | um01297 | -0.10 | 8.61  |
| 14c0003 | 0.42  | 13.26 | um01298 | -0.23 | 8.49  |
| 14c0003 | -0.58 | 11.12 | um01299 | -0.09 | 8.51  |
| 14c0003 | 0.26  | 12.94 | um01300 | -0.28 | 8.66  |
| 14c0003 | 0.37  | 13.80 | um01301 | -0.10 | 8.53  |
| 14c0003 | -1.72 | 11.91 | um01302 | -0.02 | 8.64  |
| 14c0003 | 0.09  | 13.01 | um01304 | 0.38  | 10.45 |
| 14c0003 | -0.48 | 11.38 | um01305 | 0.42  | 10.31 |
| 14c0003 | -0.56 | 13.51 | um01306 | 0.65  | 11.68 |
| 14c0003 | -0.08 | 12.12 | um01307 | 0.06  | 11.18 |
| 14c0004 | 0.21  | 9.13  | um01308 | 0.01  | 10.86 |
| 14c0004 | 0.99  | 14.21 | um01309 | 0.41  | 11.42 |
| 14c0004 | 0.26  | 10.21 | um01310 | 0.26  | 11.34 |
| 14c0004 | -0.37 | 12.45 | um01311 | 0.64  | 14.21 |
| 14c0004 | -1.46 | 10.62 | um01312 | 0.50  | 11.57 |
| 14c0004 | 0.36  | 14.48 | um01313 | -0.07 | 11.33 |

|         |       |       |         |       |       |
|---------|-------|-------|---------|-------|-------|
| 14c0004 | -0.36 | 11.91 | um01314 | -0.20 | 11.85 |
| 14c0004 | -0.33 | 12.24 | um01316 | -0.26 | 13.22 |
| 14c0004 | 0.10  | 11.92 | um01318 | -0.22 | 15.02 |
| 14c0004 | -0.34 | 13.48 | um01321 | 0.24  | 12.58 |
| 14c0005 | -0.01 | 11.47 | um01322 | 0.05  | 12.10 |
| 14c0005 | -1.23 | 12.97 | um01323 | 0.32  | 11.24 |
| 14c0005 | 0.01  | 13.63 | um01327 | -0.43 | 11.29 |
| 14c0005 | -0.06 | 9.65  | um01328 | -0.54 | 13.51 |
| 14c0005 | -0.29 | 11.14 | um01329 | -0.51 | 13.75 |
| 14c0005 | 0.48  | 12.62 | um01330 | 0.61  | 9.94  |
| 14c0005 | 0.06  | 9.32  | um01331 | -0.72 | 11.23 |
| 14c0005 | -0.06 | 11.70 | um01332 | 0.70  | 11.35 |
| 14c0005 | 0.04  | 9.14  | um01333 | 0.06  | 11.50 |
| 14c0005 | 0.30  | 10.60 | um01334 | 0.51  | 10.45 |
| 14c0006 | -0.19 | 11.02 | um01335 | 1.44  | 12.90 |
| 14c0006 | -0.10 | 11.01 | um01338 | 0.00  | 11.08 |
| 14c0006 | -0.80 | 11.49 | um01340 | 0.33  | 12.20 |
| 14c0006 | -0.12 | 13.03 | um01341 | -0.31 | 13.50 |
| 14c0006 | 0.22  | 12.90 | um01344 | 0.05  | 11.73 |
| 14c0006 | 0.12  | 12.98 | um01347 | 0.60  | 11.29 |
| 14c0006 | -0.21 | 14.02 | um01350 | -0.04 | 12.16 |
| 14c0006 | 0.71  | 13.32 | um01351 | 2.57  | 11.49 |
| 14c0006 | -0.08 | 11.33 | um01355 | -0.05 | 13.52 |
| 14c0006 | -0.68 | 11.71 | um01357 | 0.17  | 12.26 |
| 14c0007 | -0.30 | 12.81 | um01359 | -0.17 | 11.94 |
| 14c0007 | 0.14  | 11.79 | um01360 | -0.22 | 8.64  |
| 14c0007 | 0.18  | 9.84  | um01361 | -0.10 | 9.10  |
| 14c0007 | -0.63 | 12.96 | um01362 | -2.25 | 10.06 |
| 14c0007 | 0.22  | 11.34 | um01363 | 0.23  | 11.05 |
| 14c0007 | 0.15  | 11.06 | um01364 | -0.58 | 14.42 |
| 14c0007 | -0.14 | 12.73 | um01366 | -0.45 | 15.84 |
| 14c0007 | 0.18  | 13.67 | um01367 | 0.32  | 12.58 |
| 14c0007 | -0.13 | 10.26 | um01370 | -0.26 | 12.53 |
| 14c0007 | -0.01 | 11.65 | um01371 | 0.79  | 12.43 |
| 14c0008 | -0.05 | 12.08 | um01372 | -0.08 | 10.73 |
| 14c0008 | 0.07  | 8.68  | um01373 | 0.05  | 11.02 |
| 14c0008 | 0.01  | 8.73  | um01374 | 0.35  | 9.75  |
| 14c0008 | -0.07 | 8.43  | um01375 | -0.21 | 8.73  |
| 14c0008 | -0.37 | 13.98 | um01377 | -0.22 | 8.66  |
| 14c0008 | -0.09 | 10.51 | um01378 | -1.15 | 11.49 |
| 14c0008 | -0.05 | 11.90 | um01379 | 0.89  | 12.25 |
| 14c0008 | 0.17  | 8.67  | um01381 | 0.32  | 12.17 |
| 14c0008 | 0.05  | 9.54  | um01382 | 1.02  | 12.65 |
| 14c0008 | 0.05  | 11.32 | um01383 | -0.08 | 11.18 |
| 14c0009 | 0.42  | 11.99 | um01386 | 0.08  | 8.73  |
| 14c0009 | 0.22  | 13.19 | um01387 | 0.29  | 12.68 |
| 14c0009 | 0.22  | 11.47 | um01388 | -0.02 | 11.64 |
| 14c0009 | -0.21 | 13.39 | um01389 | 0.29  | 8.88  |
| 14c0009 | -0.04 | 9.75  | um01390 | 0.79  | 12.64 |
| 14c0009 | 0.37  | 13.39 | um01391 | 0.49  | 12.04 |
| 14c0009 | -0.03 | 12.54 | um01392 | -0.05 | 8.54  |
| 14c0009 | -0.51 | 10.63 | um01394 | 1.66  | 13.30 |
| 14c0009 | 0.10  | 12.11 | um01397 | 0.92  | 10.89 |
| 14c0009 | -0.15 | 9.16  | um01402 | -0.45 | 12.53 |

|         |       |       |         |       |       |
|---------|-------|-------|---------|-------|-------|
| 14c0010 | -0.86 | 10.93 | um01403 | 0.65  | 11.23 |
| 14c0010 | 0.09  | 10.34 | um01405 | -0.42 | 11.64 |
| 14c0010 | -0.04 | 11.13 | um01406 | -2.20 | 12.62 |
| 14c0010 | -0.72 | 12.16 | um01407 | -0.61 | 13.26 |
| 14c0010 | -1.08 | 10.65 | um01408 | -0.21 | 12.76 |
| 14c0010 | -0.15 | 11.95 | um01411 | 1.28  | 12.41 |
| 14c0010 | 0.47  | 12.59 | um01414 | 0.81  | 12.99 |
| 14c0010 | -0.15 | 8.98  | um01415 | 0.28  | 11.63 |
| 14c0010 | -0.57 | 10.97 | um01417 | 0.04  | 11.82 |
| 14c0010 | 0.05  | 15.89 | um01418 | 0.41  | 11.47 |
| 14c0011 | 0.02  | 12.12 | um01421 | 0.98  | 11.81 |
| 14c0011 | -0.57 | 11.33 | um01422 | 1.58  | 14.28 |
| 14c0011 | -0.57 | 11.78 | um01424 | 1.64  | 9.96  |
| 14c0011 | -0.29 | 10.54 | um01425 | 1.00  | 9.72  |
| 14c0011 | -0.27 | 11.75 | um01426 | 0.04  | 9.05  |
| 14c0011 | 0.27  | 13.56 | um01427 | -0.13 | 8.58  |
| 14c0011 | 0.63  | 12.88 | um01428 | -0.81 | 11.56 |
| 14c0011 | -0.19 | 13.44 | um01429 | -0.89 | 12.26 |
| 14c0011 | 0.41  | 12.36 | um01431 | -1.14 | 14.33 |
| 14c0011 | 0.35  | 13.13 | um01432 | -1.43 | 14.80 |
| 14c0012 | 0.00  | 12.46 | um01433 | -0.91 | 14.84 |
| 14c0012 | -0.01 | 11.02 | um01434 | -1.67 | 12.62 |
| 14c0012 | 0.20  | 13.77 | um01435 | 0.40  | 9.47  |
| 14c0012 | 0.58  | 10.81 | um01436 | -0.91 | 11.13 |
| 14c0012 | -0.02 | 8.84  | um01437 | -0.28 | 8.57  |
| 14c0012 | -0.19 | 11.41 | um01438 | -0.31 | 8.55  |
| 14c0012 | 0.23  | 10.39 | um01439 | 0.34  | 10.85 |
| 14c0012 | -0.53 | 13.30 | um01441 | 0.69  | 11.83 |
| 14c0012 | 0.16  | 12.55 | um01442 | -0.24 | 15.63 |
| 14c0012 | 0.20  | 9.46  | um01443 | -0.31 | 10.09 |
| 14c0013 | 0.06  | 11.21 | um01445 | -0.52 | 10.88 |
| 14c0013 | 0.53  | 13.93 | um01450 | -0.88 | 11.54 |
| 14c0013 | 0.01  | 8.83  | um01454 | -0.49 | 10.51 |
| 14c0013 | 0.56  | 10.68 | um01455 | -0.23 | 9.03  |
| 14c0013 | -0.16 | 11.29 | um01456 | -0.18 | 8.98  |
| 14c0013 | -0.15 | 12.87 | um01458 | -0.65 | 10.90 |
| 14c0013 | -0.21 | 12.51 | um01462 | 0.83  | 11.46 |
| 14c0013 | -0.11 | 8.50  | um01463 | -0.05 | 13.11 |
| 14d0000 | 0.09  | 8.72  | um01464 | -0.04 | 11.13 |
| 14d0000 | -0.06 | 8.84  | um01465 | 0.11  | 9.20  |
| 14d0000 | 0.05  | 11.59 | um01466 | 2.57  | 14.07 |
| 14d0000 | -0.20 | 8.98  | um01467 | 0.14  | 11.22 |
| 14d0000 | -0.07 | 9.71  | um01469 | 0.37  | 11.12 |
| 14d0000 | -0.20 | 11.82 | um01470 | -0.26 | 10.80 |
| 14d0000 | 0.39  | 12.25 | um01475 | 0.04  | 10.32 |
| 14d0000 | -0.06 | 8.84  | um01476 | -1.74 | 10.41 |
| 14d0000 | 0.31  | 10.56 | um01478 | 0.52  | 14.04 |
| 14d0001 | -0.40 | 11.99 | um01479 | 0.12  | 11.93 |
| 14d0001 | -0.51 | 12.56 | um01481 | -0.05 | 9.39  |
| 14d0001 | 0.32  | 11.75 | um01482 | 0.52  | 11.91 |
| 14d0001 | -0.07 | 12.30 | um01495 | -0.13 | 12.64 |
| 14d0001 | -0.03 | 12.77 | um01498 | -0.53 | 13.35 |
| 14d0001 | 0.25  | 15.55 | um01499 | -0.01 | 12.05 |
| 14d0001 | -0.52 | 12.22 | um01501 | 0.16  | 11.92 |

|         |       |       |         |       |       |
|---------|-------|-------|---------|-------|-------|
| 14d0001 | -0.05 | 9.19  | um01503 | -0.07 | 11.89 |
| 14d0001 | 0.01  | 12.36 | um01504 | -0.07 | 14.02 |
| 14d0001 | -0.54 | 15.29 | um01505 | -0.24 | 14.21 |
| 14d0002 | 0.04  | 14.01 | um01507 | -0.84 | 11.73 |
| 14d0002 | 0.24  | 13.48 | um01508 | -1.94 | 12.06 |
| 14d0002 | 0.27  | 11.55 | um01510 | -0.41 | 10.95 |
| 14d0002 | 0.16  | 12.80 | um01511 | 0.07  | 10.83 |
| 14d0002 | 0.17  | 13.55 | um01512 | 0.01  | 11.52 |
| 14d0002 | 0.29  | 12.64 | um01513 | -1.13 | 14.46 |
| 14d0002 | -0.05 | 13.79 | um01514 | 0.05  | 12.90 |
| 14d0002 | 0.19  | 11.19 | um01515 | -0.91 | 12.26 |
| 14d0002 | -0.05 | 11.25 | um01518 | -0.47 | 12.88 |
| 14d0002 | 0.25  | 11.70 | um01519 | 0.05  | 12.73 |
| 14d0003 | 0.42  | 12.94 | um01521 | -0.50 | 12.52 |
| 14d0003 | 0.15  | 9.97  | um01522 | -0.08 | 8.44  |
| 14d0003 | 0.06  | 8.94  | um01523 | -0.42 | 8.72  |
| 14d0003 | -0.63 | 11.65 | um01524 | -0.21 | 9.17  |
| 14d0003 | -0.37 | 13.29 | um01526 | 0.29  | 11.43 |
| 14d0003 | -0.37 | 11.04 | um01527 | -0.46 | 9.40  |
| 14d0003 | -0.76 | 12.24 | um01528 | 0.22  | 9.17  |
| 14d0003 | 0.04  | 11.60 | um01529 | 0.04  | 11.86 |
| 14d0003 | 0.05  | 13.53 | um01530 | 0.03  | 13.10 |
| 14d0003 | -0.62 | 12.23 | um01531 | -0.12 | 10.93 |
| 14d0004 | 0.22  | 12.67 | um01532 | 0.68  | 11.11 |
| 14d0004 | -0.11 | 13.20 | um01533 | -0.65 | 11.90 |
| 14d0004 | 0.23  | 11.77 | um01534 | 0.26  | 10.81 |
| 14d0004 | -0.43 | 11.80 | um01535 | -0.09 | 12.35 |
| 14d0004 | -0.06 | 8.54  | um01539 | 0.09  | 11.04 |
| 14d0004 | -0.72 | 12.32 | um01540 | -0.41 | 11.52 |
| 14d0004 | -0.37 | 12.75 | um01544 | 0.03  | 12.51 |
| 14d0004 | -0.53 | 12.69 | um01547 | -0.63 | 14.95 |
| 14d0004 | -0.06 | 11.41 | um01549 | 0.46  | 11.55 |
| 14d0004 | -0.04 | 8.76  | um01550 | 0.33  | 12.30 |
| 14d0005 | -0.44 | 13.68 | um01551 | -0.08 | 11.26 |
| 14d0005 | 0.41  | 11.45 | um01552 | -0.31 | 11.61 |
| 14d0005 | -1.31 | 12.69 | um01553 | -0.16 | 13.30 |
| 14d0005 | 0.07  | 11.55 | um01554 | -0.19 | 11.51 |
| 14d0005 | 0.03  | 12.05 | um01556 | 0.63  | 10.63 |
| 14d0005 | 0.37  | 12.35 | um01558 | 0.71  | 11.12 |
| 14d0005 | 0.04  | 12.45 | um01559 | 0.15  | 11.52 |
| 14d0005 | -0.39 | 11.46 | um01560 | -0.74 | 11.73 |
| 14d0005 | 0.17  | 9.39  | um01561 | 0.63  | 12.12 |
| 14d0005 | 1.31  | 15.00 | um01564 | -0.25 | 12.25 |
| 14d0006 | 0.93  | 11.85 | um01565 | -0.21 | 11.96 |
| 14d0006 | -0.84 | 11.99 | um01566 | 0.08  | 10.88 |
| 14d0006 | 0.18  | 11.89 | um01567 | -1.24 | 11.79 |
| 14d0006 | -0.11 | 11.19 | um01568 | 0.44  | 12.40 |
| 14d0006 | -0.40 | 12.23 | um01569 | -0.15 | 10.98 |
| 14d0006 | 0.30  | 10.96 | um01573 | 0.26  | 11.23 |
| 14d0006 | -0.28 | 12.44 | um01574 | 1.00  | 12.37 |
| 14d0006 | 0.46  | 13.61 | um01576 | 0.52  | 11.34 |
| 14d0006 | 0.19  | 12.99 | um01577 | -0.18 | 12.11 |
| 14d0006 | 0.04  | 13.63 | um01578 | 0.50  | 10.82 |
| 14d0007 | 0.22  | 13.79 | um01580 | -0.06 | 11.75 |

|         |       |       |         |       |       |
|---------|-------|-------|---------|-------|-------|
| 14d0007 | -0.05 | 12.50 | um01582 | 2.32  | 12.67 |
| 14d0007 | -0.09 | 12.54 | um01583 | 1.78  | 11.99 |
| 14d0007 | 0.08  | 11.90 | um01584 | 0.94  | 9.35  |
| 14d0007 | 0.08  | 11.23 | um01585 | 1.70  | 12.06 |
| 14d0007 | -0.48 | 11.58 | um01587 | 0.24  | 9.18  |
| 14d0007 | -0.18 | 12.85 | um01588 | 2.28  | 12.76 |
| 14d0007 | 0.05  | 8.73  | um01589 | 0.50  | 8.99  |
| 14d0007 | -0.04 | 8.89  | um01591 | 1.74  | 11.93 |
| 14d0007 | 1.09  | 13.20 | um01595 | 0.01  | 11.23 |
| 14d0008 | -0.73 | 13.29 | um01597 | 0.75  | 11.25 |
| 14d0008 | -0.25 | 14.31 | um01599 | 1.77  | 11.75 |
| 14d0008 | -0.80 | 12.48 | um01604 | -0.24 | 10.52 |
| 14d0008 | -0.08 | 9.27  | um01605 | 0.59  | 10.98 |
| 14d0008 | 0.22  | 12.41 | um01606 | -0.36 | 12.31 |
| 14d0008 | -0.19 | 12.58 | um01607 | 0.72  | 13.27 |
| 14d0008 | -0.63 | 11.87 | um01608 | 0.06  | 12.02 |
| 14d0008 | 0.16  | 13.27 | um01610 | 0.08  | 13.21 |
| 14d0008 | 0.12  | 13.90 | um01612 | 0.25  | 12.09 |
| 14d0008 | -0.02 | 8.57  | um01613 | 0.03  | 11.85 |
| 14d0009 | -0.06 | 14.92 | um01614 | 2.55  | 12.54 |
| 14d0009 | -0.27 | 13.12 | um01615 | 0.16  | 11.56 |
| 14d0009 | -0.03 | 13.52 | um01616 | 0.18  | 11.61 |
| 14d0009 | -0.35 | 13.45 | um01617 | 0.17  | 11.42 |
| 14d0009 | -1.07 | 9.81  | um01619 | -0.03 | 11.91 |
| 14d0009 | 0.11  | 10.77 | um01621 | 0.01  | 12.20 |
| 14d0009 | -0.35 | 12.42 | um01623 | 0.70  | 11.85 |
| 14d0009 | -0.11 | 12.39 | um01624 | -0.18 | 13.73 |
| 14d0009 | -0.53 | 12.29 | um01626 | -1.02 | 10.94 |
| 14d0009 | -0.52 | 12.48 | um01627 | -0.88 | 14.93 |
| 14d0010 | -0.01 | 8.40  | um01628 | 0.23  | 11.54 |
| 14d0010 | 0.00  | 12.85 | um01632 | 0.56  | 14.06 |
| 14d0010 | 0.13  | 14.52 | um01634 | 0.34  | 14.89 |
| 14d0010 | -0.40 | 12.07 | um01637 | -0.48 | 13.45 |
| 14d0010 | -0.41 | 12.05 | um01638 | -0.13 | 10.84 |
| 14d0010 | 0.01  | 8.83  | um01639 | -0.47 | 12.98 |
| 14d0010 | 1.02  | 14.45 | um01640 | -1.03 | 12.28 |
| 14d0010 | 0.25  | 12.47 | um01641 | 0.05  | 11.81 |
| 14d0010 | -0.26 | 12.89 | um01643 | 0.71  | 14.06 |
| 14d0010 | -0.11 | 10.95 | um01645 | -0.14 | 11.73 |
| 14d0011 | 0.65  | 11.22 | um01646 | -0.43 | 10.58 |
| 14d0011 | 0.26  | 13.24 | um01647 | -1.31 | 10.32 |
| 14d0011 | 0.09  | 11.55 | um01648 | -0.01 | 11.03 |
| 14d0011 | -0.27 | 10.69 | um01649 | -0.20 | 8.69  |
| 14d0011 | 0.34  | 14.31 | um01650 | -1.19 | 10.73 |
| 14d0011 | -1.91 | 10.20 | um01651 | 0.26  | 14.19 |
| 14d0011 | -0.12 | 12.63 | um01652 | -0.13 | 11.39 |
| 14d0011 | 0.06  | 11.96 | um01653 | -0.44 | 12.20 |
| 14d0011 | -0.21 | 15.11 | um01654 | -0.15 | 12.79 |
| 14d0011 | 0.84  | 12.51 | um01656 | 0.84  | 14.98 |
| 14d0012 | -0.14 | 10.65 | um01657 | -0.04 | 12.08 |
| 14d0012 | -0.58 | 11.71 | um01658 | 0.09  | 11.44 |
| 14d0012 | -0.01 | 11.88 | um01659 | 0.01  | 10.26 |
| 14d0012 | -0.19 | 9.15  | um01660 | 0.33  | 11.95 |
| 156c000 | -0.02 | 13.08 | um01661 | -0.02 | 9.14  |

|         |       |       |         |       |       |
|---------|-------|-------|---------|-------|-------|
| 15c0000 | 1.56  | 9.48  | um01662 | -0.43 | 11.76 |
| 15c0000 | 1.92  | 10.05 | um01663 | -0.60 | 10.98 |
| 15c0000 | 0.76  | 11.23 | um01664 | 0.75  | 12.98 |
| 15c0000 | -0.13 | 10.36 | um01665 | 1.13  | 13.42 |
| 15c0000 | -0.35 | 12.13 | um01667 | 0.41  | 13.13 |
| 15c0000 | 0.31  | 12.19 | um01668 | 0.35  | 11.18 |
| 15c0000 | 0.27  | 11.33 | um01669 | -0.12 | 11.84 |
| 15c0000 | 0.22  | 11.77 | um01670 | -0.31 | 12.00 |
| 15c0000 | -0.43 | 15.33 | um01671 | 0.71  | 11.42 |
| 15c0001 | 0.40  | 11.99 | um01672 | -0.54 | 14.56 |
| 15c0001 | 0.03  | 15.59 | um01673 | -0.09 | 11.89 |
| 15c0001 | 0.35  | 12.59 | um01677 | -0.41 | 9.47  |
| 15c0001 | 0.34  | 11.36 | um01679 | -0.58 | 10.90 |
| 15c0001 | -0.50 | 9.39  | um01680 | 0.13  | 11.83 |
| 15c0001 | 0.34  | 12.65 | um01682 | 0.47  | 11.08 |
| 15c0001 | 0.36  | 12.89 | um01683 | 0.12  | 12.53 |
| 15c0001 | -0.55 | 12.34 | um01684 | 0.32  | 9.29  |
| 15c0001 | 0.05  | 13.42 | um01686 | -0.57 | 12.84 |
| 15c0001 | -0.66 | 14.16 | um01687 | 0.08  | 12.06 |
| 15c0002 | -0.24 | 12.92 | um01688 | 0.82  | 11.16 |
| 15c0002 | 0.06  | 12.13 | um01689 | -0.15 | 8.73  |
| 15c0002 | -0.12 | 9.29  | um01690 | -0.06 | 9.06  |
| 15c0002 | 0.23  | 11.82 | um01691 | 0.20  | 10.10 |
| 15c0002 | 0.17  | 11.85 | um01692 | -0.35 | 12.32 |
| 15c0002 | -0.07 | 12.86 | um01694 | 0.23  | 9.66  |
| 15c0002 | 0.08  | 13.30 | um01695 | 0.00  | 8.78  |
| 15c0002 | -0.24 | 12.44 | um01696 | 0.73  | 10.02 |
| 15c0002 | -0.75 | 12.58 | um01697 | -1.01 | 12.10 |
| 15c0002 | -0.14 | 9.99  | um01698 | -0.07 | 8.93  |
| 15c0003 | -0.30 | 13.53 | um01699 | -0.75 | 12.35 |
| 15c0003 | 0.24  | 12.78 | um01700 | 0.04  | 12.49 |
| 15c0003 | 0.07  | 8.90  | um01701 | -0.16 | 10.66 |
| 15c0003 | 0.04  | 11.70 | um01702 | -0.38 | 10.47 |
| 15c0003 | -0.10 | 9.51  | um01703 | -0.02 | 10.91 |
| 15c0003 | -1.50 | 12.17 | um01705 | -0.26 | 11.46 |
| 15c0003 | -0.89 | 14.66 | um01706 | 0.02  | 10.64 |
| 15c0003 | 0.57  | 10.90 | um01708 | -1.18 | 12.55 |
| 15c0003 | 0.06  | 13.04 | um01709 | 0.30  | 10.38 |
| 15c0003 | -0.32 | 13.19 | um01710 | -1.39 | 12.28 |
| 15c0004 | 0.12  | 11.62 | um01711 | -0.81 | 14.83 |
| 15c0004 | -0.28 | 12.51 | um01712 | -0.07 | 14.44 |
| 15c0004 | -0.14 | 8.71  | um01713 | 1.35  | 10.92 |
| 15c0004 | -0.01 | 12.55 | um01714 | 0.64  | 14.49 |
| 15c0004 | -0.06 | 9.74  | um01716 | -0.51 | 8.81  |
| 15c0004 | -0.50 | 9.56  | um01717 | 0.17  | 11.27 |
| 15c0004 | 0.11  | 12.97 | um01718 | 0.12  | 9.51  |
| 15c0004 | -0.32 | 13.72 | um01720 | -0.53 | 11.56 |
| 15c0004 | 0.23  | 12.48 | um01721 | -0.58 | 11.08 |
| 15c0004 | 0.02  | 13.67 | um01722 | -1.37 | 9.81  |
| 15c0005 | -0.19 | 11.13 | um01723 | 3.44  | 13.23 |
| 15c0005 | 0.25  | 11.20 | um01724 | 1.02  | 11.86 |
| 15c0005 | -0.32 | 11.49 | um01725 | -0.32 | 15.43 |
| 15c0005 | 0.61  | 13.06 | um01726 | -1.55 | 12.72 |
| 15c0005 | 0.38  | 10.58 | um01728 | 0.50  | 13.23 |

|         |       |       |         |       |       |
|---------|-------|-------|---------|-------|-------|
| 15c0005 | 0.27  | 12.86 | um01729 | 0.01  | 10.37 |
| 15c0005 | 0.66  | 13.65 | um01730 | -0.55 | 10.55 |
| 15c0005 | 0.17  | 13.58 | um01731 | -0.15 | 8.96  |
| 15c0005 | -0.11 | 12.12 | um01732 | -0.10 | 11.21 |
| 15c0005 | 0.66  | 13.19 | um01733 | -0.09 | 9.24  |
| 15c0006 | 0.04  | 8.72  | um01734 | -0.09 | 8.58  |
| 15c0006 | 0.00  | 8.50  | um01735 | 0.35  | 12.92 |
| 15c0006 | 0.60  | 14.70 | um01736 | 0.59  | 11.69 |
| 15c0006 | 0.07  | 8.65  | um01737 | 0.64  | 11.72 |
| 15c0006 | 0.12  | 8.69  | um01738 | 0.69  | 11.58 |
| 15c0006 | 0.09  | 8.56  | um01739 | 0.07  | 12.80 |
| 15c0006 | -0.29 | 8.80  | um01742 | -0.33 | 11.98 |
| 15c0006 | 0.06  | 8.81  | um01746 | -0.15 | 10.31 |
| 15c0006 | 0.43  | 11.63 | um01747 | 1.54  | 12.88 |
| 15c0006 | 0.10  | 13.15 | um01748 | -0.32 | 12.37 |
| 15c0007 | -0.24 | 9.73  | um01750 | 1.13  | 11.67 |
| 15c0007 | 0.31  | 12.14 | um01752 | 0.27  | 11.82 |
| 15c0007 | 0.23  | 13.08 | um01753 | -0.03 | 12.33 |
| 15c0007 | -0.07 | 13.55 | um01755 | -1.33 | 11.11 |
| 15c0007 | 0.06  | 11.71 | um01756 | -0.13 | 14.14 |
| 15c0007 | -0.30 | 11.73 | um01757 | 0.12  | 8.60  |
| 15c0007 | 0.26  | 11.48 | um01758 | -0.52 | 12.08 |
| 15c0007 | 0.13  | 12.81 | um01759 | 0.15  | 11.17 |
| 15c0007 | 0.16  | 12.64 | um01761 | 0.15  | 10.35 |
| 15c0007 | 0.02  | 12.47 | um01762 | 0.06  | 10.65 |
| 15c0008 | 0.50  | 12.08 | um01763 | 0.11  | 12.08 |
| 15c0008 | 0.35  | 12.85 | um01765 | 0.66  | 11.05 |
| 15c0008 | -0.04 | 13.23 | um01768 | 0.06  | 11.81 |
| 15c0008 | -0.56 | 12.43 | um01771 | -1.03 | 12.82 |
| 15c0008 | -0.20 | 11.24 | um01772 | -0.04 | 11.22 |
| 15c0008 | -0.49 | 12.02 | um01773 | -0.35 | 11.01 |
| 15c0008 | 0.77  | 11.91 | um01774 | -0.27 | 10.09 |
| 15c0008 | -0.03 | 11.11 | um01775 | -0.84 | 12.44 |
| 15c0008 | -0.16 | 10.11 | um01776 | 0.12  | 10.70 |
| 15c0008 | -0.10 | 8.77  | um01777 | -0.30 | 12.39 |
| 15c0009 | 0.28  | 8.56  | um01778 | 0.13  | 9.64  |
| 15c0009 | 0.02  | 10.02 | um01779 | -0.18 | 8.56  |
| 15c0009 | -0.09 | 9.71  | um01782 | 0.77  | 13.11 |
| 15c0009 | 0.00  | 8.73  | um01783 | -1.02 | 11.60 |
| 15c0009 | 0.15  | 8.78  | um01784 | -0.06 | 14.00 |
| 15c0009 | -0.02 | 8.58  | um01785 | -3.03 | 10.09 |
| 15c0009 | -0.08 | 8.63  | um01786 | 0.17  | 11.34 |
| 15d0000 | 2.16  | 11.48 | um01787 | -1.03 | 10.73 |
| 15d0000 | -0.04 | 15.66 | um01788 | -0.27 | 14.67 |
| 15d0000 | 0.00  | 10.24 | um01789 | 0.07  | 13.07 |
| 15d0000 | 0.24  | 12.23 | um01790 | 0.57  | 10.77 |
| 15d0000 | 0.27  | 13.43 | um01791 | -0.61 | 10.15 |
| 15d0000 | 0.01  | 10.90 | um01792 | 1.28  | 13.06 |
| 15d0000 | -0.59 | 11.95 | um01793 | 1.59  | 11.12 |
| 15d0000 | -0.71 | 12.89 | um01794 | -0.09 | 11.12 |
| 15d0000 | -0.14 | 8.79  | um01795 | -0.13 | 12.49 |
| 15d0001 | -0.26 | 13.06 | um01796 | 0.52  | 10.63 |
| 15d0001 | -0.06 | 13.41 | um01797 | 0.11  | 11.84 |
| 15d0001 | 0.49  | 12.89 | um01799 | 0.20  | 14.60 |



|         |       |       |         |       |       |
|---------|-------|-------|---------|-------|-------|
| 15d0001 | 0.12  | 12.39 | um01800 | -1.03 | 11.91 |
| 15d0001 | -0.58 | 9.97  | um01802 | -0.28 | 12.84 |
| 15d0001 | 0.19  | 12.51 | um01803 | 0.14  | 12.42 |
| 15d0001 | -0.06 | 12.12 | um01804 | -2.46 | 10.31 |
| 15d0001 | -0.11 | 10.20 | um01805 | 2.17  | 12.00 |
| 15d0001 | 0.03  | 11.46 | um01808 | -0.05 | 12.91 |
| 15d0001 | 0.45  | 13.68 | um01811 | -0.02 | 12.92 |
| 15d0002 | 0.25  | 11.52 | um01812 | -2.19 | 13.21 |
| 15d0002 | 0.15  | 12.42 | um01813 | -0.90 | 11.90 |
| 15d0002 | 0.03  | 15.78 | um01814 | -0.01 | 11.57 |
| 15d0002 | 0.32  | 10.73 | um01815 | 0.80  | 12.49 |
| 15d0002 | 0.09  | 14.87 | um01816 | 0.41  | 11.15 |
| 15d0002 | -0.53 | 13.20 | um01817 | 0.05  | 10.54 |
| 15d0002 | -1.21 | 12.13 | um01818 | -0.51 | 11.88 |
| 15d0002 | 0.14  | 8.69  | um01820 | 0.21  | 9.12  |
| 15d0002 | -0.21 | 12.08 | um01821 | 0.57  | 12.20 |
| 15d0002 | 0.25  | 15.86 | um01823 | 0.63  | 9.58  |
| 15d0003 | 0.44  | 13.27 | um01824 | 0.85  | 11.88 |
| 15d0003 | 0.27  | 11.93 | um01826 | -0.98 | 10.46 |
| 15d0003 | 0.11  | 13.27 | um01827 | 1.51  | 13.06 |
| 15d0003 | 0.04  | 9.18  | um01829 | 0.15  | 8.97  |
| 15d0003 | -0.39 | 15.42 | um01830 | 0.31  | 10.68 |
| 15d0003 | -0.29 | 13.01 | um01831 | 0.72  | 10.39 |
| 15d0003 | -0.18 | 13.03 | um01832 | 0.48  | 13.08 |
| 15d0003 | 0.02  | 15.95 | um01833 | 0.05  | 11.89 |
| 15d0003 | -0.07 | 13.53 | um01834 | 0.24  | 10.61 |
| 15d0003 | 0.37  | 11.81 | um01835 | 1.03  | 12.63 |
| 15d0004 | 0.01  | 14.24 | um01837 | -0.19 | 12.24 |
| 15d0004 | 0.26  | 10.37 | um01841 | -0.16 | 8.60  |
| 15d0004 | -0.04 | 12.53 | um01842 | -0.07 | 9.39  |
| 15d0004 | 0.04  | 10.36 | um01843 | -0.14 | 11.18 |
| 15d0004 | 0.41  | 12.30 | um01844 | -0.17 | 8.68  |
| 15d0004 | -0.44 | 11.75 | um01845 | 0.34  | 12.13 |
| 15d0004 | -0.37 | 12.24 | um01847 | 1.59  | 10.81 |
| 15d0004 | -0.14 | 9.02  | um01849 | -0.27 | 11.36 |
| 15d0004 | 0.13  | 12.19 | um01850 | 1.03  | 14.29 |
| 15d0004 | -0.24 | 9.61  | um01851 | 0.34  | 14.50 |
| 15d0005 | -0.36 | 8.89  | um01852 | 0.37  | 12.16 |
| 15d0005 | -0.21 | 8.97  | um01853 | -0.24 | 11.10 |
| 15d0005 | -0.06 | 12.74 | um01854 | 1.10  | 9.80  |
| 15d0005 | 0.16  | 11.15 | um01855 | 0.18  | 9.09  |
| 15d0005 | 0.13  | 11.54 | um01856 | 0.94  | 10.57 |
| 15d0005 | -0.36 | 13.01 | um01857 | 0.24  | 10.64 |
| 15d0005 | 0.47  | 10.71 | um01858 | -1.93 | 11.01 |
| 15d0005 | -0.18 | 12.06 | um01859 | -1.33 | 11.56 |
| 15d0005 | 0.03  | 11.11 | um01860 | 0.55  | 10.74 |
| 15d0005 | -0.27 | 11.91 | um01861 | 1.04  | 12.75 |
| 15d0006 | 0.06  | 8.48  | um01862 | 0.24  | 10.41 |
| 15d0006 | 0.10  | 8.36  | um01863 | 0.77  | 9.63  |
| 15d0006 | 0.06  | 13.33 | um01864 | 0.51  | 10.58 |
| 15d0006 | -0.42 | 11.41 | um01866 | -0.09 | 12.41 |
| 15d0006 | 0.24  | 14.02 | um01867 | -0.41 | 10.80 |
| 15d0006 | 0.13  | 11.37 | um01868 | 1.14  | 12.30 |
| 15d0006 | 0.14  | 11.14 | um01869 | 0.03  | 11.92 |

|         |       |       |         |       |       |
|---------|-------|-------|---------|-------|-------|
| 15d0006 | 0.56  | 12.13 | um01870 | 0.14  | 13.29 |
| 15d0006 | 0.13  | 12.36 | um01871 | 1.85  | 11.75 |
| 15d0006 | 0.07  | 12.63 | um01872 | 2.66  | 13.84 |
| 15d0007 | -0.34 | 10.02 | um01873 | -0.16 | 11.44 |
| 15d0007 | 0.15  | 9.51  | um01874 | 0.33  | 10.79 |
| 15d0007 | 0.30  | 13.14 | um01875 | 0.36  | 11.51 |
| 15d0007 | 0.28  | 12.84 | um01877 | 0.56  | 11.32 |
| 15d0007 | -0.44 | 12.15 | um01879 | 0.37  | 12.41 |
| 15d0007 | 0.13  | 12.13 | um01881 | -0.48 | 13.45 |
| 15d0007 | -0.78 | 13.00 | um01882 | -1.08 | 14.06 |
| 15d0007 | 0.02  | 12.04 | um01883 | -0.27 | 13.16 |
| 15d0007 | 0.09  | 9.27  | um01885 | -0.42 | 11.57 |
| 15d0007 | -0.02 | 9.24  | um01886 | -0.02 | 14.32 |
| 15d0008 | -0.53 | 12.42 | um01888 | -0.30 | 12.56 |
| 15d0008 | -0.21 | 12.80 | um01889 | 0.53  | 12.12 |
| 15d0008 | -0.26 | 11.28 | um01890 | -0.41 | 8.89  |
| 15d0008 | 0.10  | 13.25 | um01891 | 0.02  | 10.61 |
| 15d0008 | -0.82 | 10.68 | um01892 | 0.09  | 12.01 |
| 15d0008 | 0.04  | 8.69  | um01893 | 0.28  | 11.88 |
| 15d0008 | 0.10  | 9.15  | um01894 | 1.03  | 14.15 |
| 15d0008 | -0.02 | 8.91  | um01896 | 0.03  | 10.82 |
| 15d0008 | 0.07  | 9.22  | um01897 | 0.17  | 8.85  |
| 15d0008 | -0.09 | 9.17  | um01898 | -2.48 | 11.20 |
| 15d0009 | -0.17 | 8.76  | um01899 | 1.14  | 10.09 |
| 15d0009 | -0.11 | 8.66  | um01900 | 0.02  | 13.17 |
| 15d0009 | -0.08 | 8.65  | um01901 | -0.18 | 10.80 |
| 15d0009 | 0.12  | 8.55  | um01902 | -0.05 | 13.64 |
| 15d0009 | -0.04 | 8.48  | um01903 | -0.49 | 11.40 |
| 16c0000 | -0.30 | 8.89  | um01904 | -0.69 | 11.98 |
| 16c0000 | 0.15  | 8.73  | um01905 | 0.67  | 12.06 |
| 16c0000 | 0.02  | 11.59 | um01906 | 0.87  | 11.87 |
| 16c0000 | 0.00  | 9.38  | um01908 | 0.34  | 10.83 |
| 16c0000 | -0.93 | 12.62 | um01911 | 1.31  | 12.81 |
| 16c0000 | 0.59  | 13.89 | um01913 | 0.16  | 10.34 |
| 16c0000 | -0.26 | 11.88 | um01916 | 0.18  | 11.26 |
| 16c0000 | -0.02 | 8.97  | um01917 | 1.05  | 11.78 |
| 16c0000 | 0.02  | 9.58  | um01919 | 0.41  | 12.34 |
| 16c0001 | -0.26 | 13.27 | um01920 | 0.36  | 11.59 |
| 16c0001 | 0.38  | 12.33 | um01922 | 1.38  | 11.12 |
| 16c0001 | 1.04  | 14.93 | um01923 | 0.14  | 11.93 |
| 16c0001 | 0.22  | 12.11 | um01926 | -0.43 | 11.84 |
| 16c0001 | -0.02 | 12.01 | um01927 | -0.10 | 12.46 |
| 16c0001 | 0.05  | 10.92 | um01928 | -0.42 | 12.15 |
| 16c0001 | 0.21  | 10.68 | um01929 | 0.02  | 12.57 |
| 16c0001 | -0.67 | 12.55 | um01931 | 0.08  | 9.98  |
| 16c0001 | 0.23  | 12.46 | um01932 | -0.20 | 10.15 |
| 16c0001 | 0.15  | 12.20 | um01933 | -0.99 | 13.74 |
| 16c0002 | -0.44 | 13.48 | um01934 | -0.44 | 12.72 |
| 16c0002 | 0.19  | 12.70 | um01935 | -0.10 | 13.30 |
| 16c0002 | -0.06 | 8.78  | um01936 | -0.95 | 14.27 |
| 16c0002 | 0.13  | 10.32 | um01937 | 0.08  | 11.53 |
| 16c0002 | -0.44 | 12.24 | um01938 | -0.02 | 12.62 |
| 16c0002 | -0.22 | 12.42 | um01939 | -0.27 | 11.48 |
| 16c0002 | 0.38  | 14.29 | um01940 | -0.03 | 11.91 |

|         |       |       |         |       |       |
|---------|-------|-------|---------|-------|-------|
| 16c0002 | -0.21 | 9.55  | um01941 | 0.57  | 10.60 |
| 16c0002 | -0.52 | 10.36 | um01942 | -0.20 | 12.14 |
| 16c0002 | -1.54 | 10.02 | um01943 | 0.69  | 10.69 |
| 16c0003 | -0.02 | 13.70 | um01944 | -0.16 | 8.81  |
| 16c0003 | 0.06  | 10.04 | um01945 | -0.79 | 11.50 |
| 16c0003 | -0.60 | 14.41 | um01946 | 0.26  | 10.95 |
| 16c0003 | 0.34  | 13.72 | um01947 | -3.23 | 10.23 |
| 16c0003 | -0.26 | 11.64 | um01948 | -0.52 | 11.55 |
| 16c0003 | -0.15 | 13.62 | um01949 | -3.25 | 10.75 |
| 16c0003 | -0.12 | 12.68 | um01950 | -0.07 | 9.11  |
| 16c0003 | -0.37 | 11.32 | um01951 | -1.77 | 11.35 |
| 16c0003 | 0.08  | 12.72 | um01952 | 1.59  | 9.81  |
| 16c0003 | -0.30 | 12.46 | um01953 | 0.92  | 10.80 |
| 16c0004 | -0.31 | 10.54 | um01954 | 0.17  | 10.91 |
| 16c0004 | -0.77 | 12.80 | um01957 | -0.10 | 11.41 |
| 16c0004 | -0.09 | 12.53 | um01958 | 0.35  | 11.02 |
| 16c0004 | -0.14 | 12.33 | um01959 | 0.56  | 10.91 |
| 16c0004 | -0.31 | 12.59 | um01961 | -0.23 | 9.18  |
| 16c0004 | -0.64 | 12.71 | um01962 | 0.61  | 12.62 |
| 16c0004 | -0.32 | 11.68 | um01963 | 0.34  | 11.16 |
| 16c0004 | -0.13 | 11.31 | um01964 | 0.19  | 10.72 |
| 16c0004 | -0.17 | 10.85 | um01965 | 0.14  | 11.26 |
| 16c0004 | -0.14 | 13.57 | um01966 | 0.29  | 12.50 |
| 16c0005 | -0.82 | 12.34 | um01967 | -0.59 | 12.12 |
| 16c0005 | 0.26  | 10.65 | um01968 | 0.78  | 10.58 |
| 16c0005 | 0.45  | 13.99 | um01969 | 0.70  | 11.48 |
| 16c0005 | -0.46 | 11.24 | um01970 | 1.15  | 13.31 |
| 16c0005 | -0.24 | 11.83 | um01971 | 2.76  | 13.61 |
| 16c0005 | -0.31 | 13.02 | um01974 | 0.02  | 12.06 |
| 16c0005 | 0.09  | 11.84 | um01976 | -1.28 | 11.58 |
| 16c0005 | 0.15  | 15.13 | um01977 | -0.81 | 10.25 |
| 16c0005 | -0.26 | 13.47 | um01978 | -0.13 | 12.79 |
| 16c0005 | -0.28 | 12.82 | um01979 | 0.55  | 10.45 |
| 16c0006 | -0.08 | 10.26 | um01980 | 0.05  | 11.97 |
| 16c0006 | 0.10  | 12.75 | um01981 | 0.60  | 12.00 |
| 16c0006 | 0.77  | 12.81 | um01982 | -0.18 | 10.92 |
| 16c0006 | 0.90  | 12.67 | um01983 | 0.56  | 10.89 |
| 16c0006 | -0.04 | 12.10 | um01984 | 1.43  | 14.88 |
| 16c0006 | -0.40 | 11.79 | um01985 | 0.30  | 9.58  |
| 16c0006 | 0.37  | 9.12  | um01986 | 0.92  | 14.26 |
| 16c0006 | -0.03 | 12.77 | um01987 | 0.18  | 9.14  |
| 16c0006 | 0.16  | 13.56 | um01988 | 0.10  | 10.91 |
| 16c0006 | 0.98  | 13.67 | um01989 | -1.20 | 10.60 |
| 16c0007 | -0.54 | 13.46 | um01990 | 0.08  | 10.73 |
| 16c0007 | -0.29 | 9.63  | um01991 | -0.15 | 11.14 |
| 16c0007 | 0.64  | 14.35 | um01992 | -0.77 | 11.98 |
| 16c0007 | -0.94 | 11.59 | um01994 | -0.32 | 13.75 |
| 16c0007 | -0.11 | 11.75 | um01995 | 0.34  | 12.02 |
| 16c0007 | 0.37  | 12.07 | um01996 | -0.47 | 11.81 |
| 16c0007 | -0.65 | 13.23 | um01997 | 1.55  | 13.22 |
| 16c0007 | 0.02  | 10.46 | um01999 | 0.14  | 12.20 |
| 16c0007 | 0.15  | 13.28 | um02001 | 0.94  | 11.97 |
| 16c0007 | 0.65  | 11.13 | um02002 | -0.41 | 11.44 |
| 16c0008 | 0.67  | 10.91 | um02003 | -0.16 | 9.01  |

|         |       |       |         |       |       |
|---------|-------|-------|---------|-------|-------|
| 16c0008 | 0.16  | 11.54 | um02004 | -0.18 | 10.72 |
| 16c0008 | 0.30  | 10.42 | um02005 | -0.80 | 11.20 |
| 16c0008 | 0.20  | 11.25 | um02006 | 0.97  | 9.81  |
| 16c0008 | 0.07  | 9.46  | um02007 | -0.56 | 12.50 |
| 16c0008 | -0.44 | 10.35 | um02008 | 1.29  | 12.11 |
| 16c0008 | 0.06  | 13.89 | um02010 | -0.44 | 11.09 |
| 16c0008 | 0.22  | 12.11 | um02011 | -0.15 | 9.69  |
| 16c0008 | -0.06 | 8.68  | um02012 | 1.38  | 11.46 |
| 16c0008 | -0.13 | 11.48 | um02014 | 0.10  | 12.38 |
| 16c0009 | 0.08  | 9.71  | um02015 | -0.18 | 11.87 |
| 16c0009 | 0.10  | 12.13 | um02016 | -0.10 | 11.93 |
| 16c0009 | -0.32 | 11.67 | um02017 | 0.08  | 11.38 |
| 16d0000 | 0.02  | 10.25 | um02018 | -0.12 | 11.63 |
| 16d0000 | 0.60  | 11.71 | um02019 | 0.21  | 13.05 |
| 16d0000 | 0.04  | 12.36 | um02020 | -0.21 | 10.75 |
| 16d0000 | 0.09  | 12.92 | um02021 | 0.17  | 8.99  |
| 16d0000 | 0.46  | 12.29 | um02022 | 0.20  | 9.85  |
| 16d0000 | -0.26 | 10.83 | um02023 | 1.64  | 13.26 |
| 16d0000 | 0.07  | 8.55  | um02024 | -0.52 | 12.54 |
| 16d0000 | 0.18  | 11.66 | um02028 | 0.56  | 11.29 |
| 16d0000 | 0.53  | 13.25 | um02031 | 0.40  | 10.34 |
| 16d0001 | 0.05  | 9.80  | um02034 | 0.33  | 11.80 |
| 16d0001 | 0.16  | 13.00 | um02035 | 1.10  | 10.75 |
| 16d0001 | -0.28 | 12.45 | um02037 | 0.88  | 11.18 |
| 16d0001 | 0.24  | 12.27 | um02039 | 0.29  | 11.39 |
| 16d0001 | 0.58  | 10.00 | um02040 | 0.77  | 10.93 |
| 16d0001 | 0.23  | 12.43 | um02041 | 0.24  | 11.47 |
| 16d0001 | 0.08  | 8.85  | um02044 | 0.21  | 10.74 |
| 16d0001 | -0.11 | 12.23 | um02045 | -0.05 | 11.98 |
| 16d0001 | -0.03 | 10.30 | um02046 | -0.59 | 13.71 |
| 16d0001 | -0.29 | 12.95 | um02049 | 0.16  | 12.01 |
| 16d0002 | -0.33 | 13.01 | um02050 | 0.30  | 11.52 |
| 16d0002 | 0.08  | 11.92 | um02052 | 1.24  | 12.32 |
| 16d0002 | -0.69 | 11.31 | um02053 | -0.16 | 10.47 |
| 16d0002 | 0.00  | 14.64 | um02055 | -0.03 | 11.93 |
| 16d0002 | 0.21  | 12.74 | um02056 | 0.24  | 12.23 |
| 16d0002 | 0.56  | 12.63 | um02057 | -0.29 | 12.53 |
| 16d0002 | 0.00  | 12.80 | um02059 | 0.10  | 11.05 |
| 16d0002 | 0.07  | 11.23 | um02062 | 0.04  | 12.03 |
| 16d0002 | 0.28  | 13.04 | um02063 | -0.86 | 11.20 |
| 16d0002 | -0.54 | 11.91 | um02064 | 0.17  | 14.16 |
| 16d0003 | 0.17  | 12.54 | um02065 | -0.09 | 12.33 |
| 16d0003 | -0.16 | 13.06 | um02066 | -0.06 | 12.29 |
| 16d0003 | -0.17 | 11.89 | um02067 | -0.14 | 11.56 |
| 16d0003 | 0.24  | 13.08 | um02068 | 0.59  | 11.03 |
| 16d0003 | 0.12  | 11.46 | um02069 | 0.27  | 12.35 |
| 16d0003 | 0.32  | 12.17 | um02070 | 0.15  | 12.13 |
| 16d0003 | 0.27  | 10.18 | um02071 | 0.58  | 12.33 |
| 16d0003 | -0.29 | 12.81 | um02072 | -0.99 | 11.61 |
| 16d0003 | 0.59  | 13.37 | um02075 | 0.14  | 11.69 |
| 16d0003 | -0.51 | 10.36 | um02077 | 0.56  | 10.98 |
| 16d0004 | -0.11 | 12.78 | um02079 | 0.10  | 14.74 |
| 16d0004 | -0.78 | 12.42 | um02080 | 2.32  | 12.01 |
| 16d0004 | -1.87 | 12.67 | um02081 | -0.42 | 12.43 |

|         |       |       |         |       |       |
|---------|-------|-------|---------|-------|-------|
| 16d0004 | -0.47 | 10.20 | um02083 | -0.10 | 11.61 |
| 16d0004 | -0.04 | 11.75 | um02088 | 0.03  | 13.59 |
| 16d0004 | -0.21 | 12.08 | um02089 | -0.10 | 11.04 |
| 16d0004 | -0.39 | 12.69 | um02091 | -0.33 | 11.44 |
| 16d0004 | -0.38 | 14.33 | um02092 | -2.54 | 11.97 |
| 16d0004 | 0.16  | 10.50 | um02093 | -0.12 | 12.54 |
| 16d0004 | -0.02 | 12.37 | um02094 | 0.14  | 11.75 |
| 16d0005 | 0.74  | 12.76 | um02095 | 1.44  | 13.67 |
| 16d0005 | -1.13 | 12.58 | um02096 | -0.21 | 8.45  |
| 16d0005 | -0.89 | 13.71 | um02097 | 1.27  | 12.49 |
| 16d0005 | -0.12 | 12.77 | um02101 | -0.52 | 12.69 |
| 16d0005 | 0.35  | 11.51 | um02102 | 0.11  | 11.62 |
| 16d0005 | 0.28  | 11.54 | um02103 | -0.24 | 11.41 |
| 16d0005 | -0.41 | 12.78 | um02104 | 0.52  | 11.41 |
| 16d0005 | -0.32 | 11.93 | um02105 | 0.69  | 13.02 |
| 16d0005 | 0.01  | 12.28 | um02107 | 0.14  | 12.01 |
| 16d0005 | -0.06 | 14.38 | um02108 | 0.28  | 10.56 |
| 16d0006 | 0.44  | 14.17 | um02111 | -0.38 | 9.20  |
| 16d0006 | 0.59  | 13.77 | um02112 | 0.37  | 10.56 |
| 16d0006 | 0.37  | 13.29 | um02113 | 0.34  | 11.24 |
| 16d0006 | 0.38  | 13.19 | um02114 | -0.61 | 11.58 |
| 16d0006 | -0.67 | 12.36 | um02115 | 0.54  | 8.91  |
| 16d0006 | -0.27 | 12.81 | um02116 | -0.03 | 10.96 |
| 16d0006 | 0.39  | 12.64 | um02117 | -1.24 | 10.74 |
| 16d0006 | -0.05 | 12.13 | um02118 | -0.09 | 11.28 |
| 16d0006 | -1.07 | 13.54 | um02119 | 1.09  | 10.15 |
| 16d0006 | -0.39 | 11.38 | um02123 | 0.15  | 11.46 |
| 16d0007 | -1.04 | 13.88 | um02124 | -0.38 | 11.54 |
| 16d0007 | -0.46 | 14.96 | um02125 | -0.87 | 11.42 |
| 16d0007 | 0.46  | 13.11 | um02126 | 0.39  | 12.48 |
| 16d0007 | -0.68 | 11.02 | um02127 | 0.33  | 11.35 |
| 16d0007 | -0.57 | 11.86 | um02128 | -0.21 | 11.35 |
| 16d0007 | 0.09  | 11.87 | um02131 | 0.93  | 11.71 |
| 16d0007 | 1.49  | 12.87 | um02132 | 0.08  | 12.03 |
| 16d0007 | -0.03 | 11.57 | um02133 | -0.44 | 11.03 |
| 16d0007 | -1.24 | 10.74 | um02134 | -0.59 | 11.57 |
| 16d0007 | 0.18  | 10.45 | um02135 | 0.14  | 9.96  |
| 16d0008 | -0.18 | 10.59 | um02136 | -0.17 | 8.84  |
| 16d0008 | -0.08 | 11.25 | um02137 | -0.32 | 9.14  |
| 16d0008 | 0.20  | 11.84 | um02138 | 0.01  | 8.86  |
| 16d0008 | 0.03  | 9.16  | um02139 | 0.44  | 11.02 |
| 16d0008 | 0.08  | 8.40  | um02140 | 0.36  | 9.42  |
| 16d0008 | 0.21  | 13.54 | um02141 | 0.00  | 9.13  |
| 16d0008 | -0.45 | 11.78 | um02142 | 0.67  | 11.06 |
| 16d0008 | -0.43 | 10.70 | um02144 | 0.19  | 9.13  |
| 17d0000 | 0.07  | 8.73  | um02146 | -0.21 | 13.09 |
| 18c0000 | 0.22  | 10.78 | um02147 | -0.25 | 11.23 |
| 18c0000 | 0.00  | 13.32 | um02148 | 0.55  | 11.29 |
| 18c0000 | -0.05 | 12.28 | um02149 | 0.51  | 10.50 |
| 18c0000 | -0.18 | 10.93 | um02150 | -0.86 | 12.73 |
| 18c0000 | -0.09 | 8.80  | um02151 | -0.18 | 12.99 |
| 18c0000 | 0.86  | 11.85 | um02152 | 0.76  | 9.96  |
| 18c0000 | -0.30 | 12.73 | um02154 | -0.61 | 12.25 |
| 18c0000 | -0.50 | 11.35 | um02156 | 0.31  | 10.19 |

|         |       |       |         |       |       |
|---------|-------|-------|---------|-------|-------|
| 18c0000 | 0.26  | 12.97 | um02157 | 1.29  | 10.08 |
| 18c0001 | 0.07  | 8.89  | um02158 | -0.86 | 15.05 |
| 18c0001 | -0.69 | 10.70 | um02159 | -0.19 | 12.18 |
| 18c0001 | 0.25  | 10.57 | um02160 | 1.12  | 11.20 |
| 18c0001 | 0.42  | 11.54 | um02161 | 1.69  | 12.75 |
| 18c0001 | -0.14 | 12.44 | um02162 | 0.44  | 12.38 |
| 18c0001 | 0.14  | 12.46 | um02163 | -0.17 | 9.94  |
| 18c0001 | -0.13 | 13.11 | um02164 | -0.81 | 12.19 |
| 18c0001 | -0.40 | 10.59 | um02165 | -0.65 | 12.46 |
| 18c0001 | 0.70  | 13.70 | um02166 | 1.60  | 11.85 |
| 18c0001 | 0.19  | 10.59 | um02167 | -0.13 | 12.11 |
| 18c0002 | 0.03  | 12.21 | um02168 | -0.12 | 12.27 |
| 18c0002 | -0.11 | 11.19 | um02169 | 2.52  | 11.99 |
| 18c0002 | 0.04  | 9.57  | um02170 | 0.81  | 10.83 |
| 18c0002 | 0.04  | 13.29 | um02172 | 1.50  | 11.41 |
| 18c0002 | 0.32  | 12.19 | um02174 | -0.15 | 8.66  |
| 18c0002 | -0.17 | 8.86  | um02175 | -1.99 | 11.88 |
| 18c0002 | -0.49 | 11.52 | um02177 | -0.02 | 10.85 |
| 18c0002 | 0.19  | 13.33 | um02178 | -0.12 | 12.32 |
| 18c0002 | 0.02  | 12.39 | um02179 | -0.38 | 11.99 |
| 18c0002 | -0.53 | 11.72 | um02180 | 0.26  | 10.96 |
| 18c0003 | -0.10 | 9.10  | um02181 | 0.28  | 12.40 |
| 18c0003 | -1.17 | 10.84 | um02182 | 1.62  | 13.79 |
| 18c0003 | -0.09 | 12.39 | um02185 | 0.76  | 11.29 |
| 18c0003 | 0.30  | 10.48 | um02186 | -0.08 | 10.85 |
| 18c0003 | 0.85  | 13.32 | um02189 | 0.71  | 12.11 |
| 18c0003 | 0.60  | 11.20 | um02190 | -0.21 | 11.28 |
| 18c0003 | 0.44  | 12.62 | um02191 | -1.90 | 12.82 |
| 18c0003 | 0.05  | 9.32  | um02192 | 0.13  | 9.37  |
| 18c0003 | -0.10 | 11.41 | um02193 | -0.15 | 8.71  |
| 18c0003 | -0.35 | 14.77 | um02194 | -0.25 | 8.64  |
| 18c0004 | 0.16  | 14.38 | um02196 | -0.34 | 8.58  |
| 18c0004 | -0.23 | 12.97 | um02197 | 1.48  | 11.84 |
| 18c0004 | -0.50 | 12.33 | um02198 | 1.46  | 12.68 |
| 18c0004 | -0.11 | 9.13  | um02199 | 0.65  | 10.65 |
| 18c0004 | -0.24 | 8.71  | um02201 | -1.31 | 11.11 |
| 18c0004 | 0.04  | 13.82 | um02202 | -0.24 | 11.93 |
| 18c0004 | -0.47 | 12.45 | um02203 | 1.42  | 10.72 |
| 18c0004 | -0.08 | 9.78  | um02204 | 0.83  | 9.42  |
| 18c0004 | -0.78 | 12.06 | um02206 | -0.33 | 9.28  |
| 18c0004 | -0.04 | 10.32 | um02207 | -1.80 | 11.89 |
| 18c0005 | -0.04 | 10.97 | um02208 | 1.59  | 13.45 |
| 18c0005 | 0.20  | 14.06 | um02209 | -0.39 | 11.82 |
| 18c0005 | 0.05  | 11.56 | um02211 | 0.16  | 12.24 |
| 18c0005 | -0.45 | 9.73  | um02212 | 0.30  | 11.67 |
| 18c0005 | -0.52 | 11.92 | um02213 | 0.66  | 12.34 |
| 18c0005 | 0.14  | 10.75 | um02214 | -0.31 | 11.42 |
| 18c0005 | 0.28  | 12.52 | um02215 | -4.84 | 11.27 |
| 18c0005 | 0.05  | 11.55 | um02216 | 0.04  | 11.61 |
| 18c0005 | 0.10  | 12.28 | um02217 | -0.22 | 12.41 |
| 18c0005 | 0.12  | 11.70 | um02218 | 0.24  | 11.79 |
| 18c0006 | -0.58 | 12.22 | um02219 | 0.60  | 14.65 |
| 18c0006 | 0.00  | 11.94 | um02220 | 0.75  | 11.09 |
| 18c0006 | -0.45 | 13.27 | um02221 | 0.24  | 12.62 |

|         |       |       |         |       |       |
|---------|-------|-------|---------|-------|-------|
| 18c0006 | 0.04  | 11.44 | um02222 | -0.14 | 8.83  |
| 18c0006 | -0.24 | 13.13 | um02223 | 0.75  | 10.60 |
| 18c0006 | 0.70  | 11.76 | um02224 | 0.40  | 11.23 |
| 18c0006 | 0.00  | 9.51  | um02225 | 0.37  | 10.60 |
| 18c0006 | -0.03 | 12.27 | um02226 | -0.14 | 10.44 |
| 18c0006 | 0.02  | 8.79  | um02227 | 0.39  | 10.93 |
| 18c0006 | -0.24 | 10.91 | um02229 | -0.15 | 9.38  |
| 18c0007 | 0.31  | 10.37 | um02230 | 0.35  | 10.63 |
| 18c0007 | 0.62  | 13.76 | um02231 | 0.21  | 9.10  |
| 18c0007 | -0.41 | 11.78 | um02232 | 0.58  | 12.30 |
| 18c0007 | -0.27 | 11.29 | um02234 | 0.23  | 11.64 |
| 18c0007 | -0.47 | 11.77 | um02235 | 1.41  | 12.56 |
| 18c0007 | 0.04  | 12.38 | um02236 | 0.88  | 10.59 |
| 18c0007 | 0.26  | 13.11 | um02237 | -0.32 | 11.89 |
| 18c0007 | 0.30  | 10.31 | um02238 | -0.58 | 10.25 |
| 18c0007 | 0.13  | 14.41 | um02239 | 0.29  | 9.57  |
| 18c0007 | -0.24 | 14.19 | um02242 | 0.27  | 10.56 |
| 18c0008 | -0.51 | 11.93 | um02243 | 0.18  | 11.76 |
| 18c0008 | -0.22 | 13.44 | um02244 | -0.05 | 12.18 |
| 18c0008 | -0.19 | 8.63  | um02245 | -0.16 | 13.45 |
| 18c0008 | -0.43 | 11.37 | um02246 | -0.45 | 11.03 |
| 18c0008 | 0.06  | 12.86 | um02247 | 0.62  | 10.95 |
| 18c0008 | 0.24  | 13.09 | um02249 | 0.27  | 12.13 |
| 18c0008 | 0.04  | 13.88 | um02251 | 1.46  | 10.36 |
| 18c0008 | 0.30  | 10.10 | um02252 | -0.27 | 11.08 |
| 18c0008 | 0.06  | 10.70 | um02253 | -0.20 | 11.78 |
| 18c0008 | -0.14 | 10.87 | um02254 | 0.77  | 11.96 |
| 18c0009 | -0.09 | 10.72 | um02255 | -0.03 | 12.28 |
| 18c0009 | 0.05  | 8.79  | um02256 | -0.96 | 10.35 |
| 18c0009 | -0.15 | 12.30 | um02258 | -0.58 | 13.81 |
| 18c0009 | -0.60 | 13.68 | um02259 | 0.29  | 10.97 |
| 18c0009 | 0.24  | 11.63 | um02260 | -0.22 | 12.26 |
| 18c0009 | 0.50  | 13.78 | um02262 | -0.07 | 11.33 |
| 18c0009 | 0.02  | 9.27  | um02263 | 0.20  | 12.55 |
| 18c0009 | 0.23  | 13.37 | um02264 | 0.31  | 12.21 |
| 18c0009 | 0.69  | 10.98 | um02266 | -0.12 | 12.77 |
| 18c0009 | 0.01  | 8.99  | um02267 | -0.53 | 15.66 |
| 18c0010 | 0.18  | 9.81  | um02268 | 0.25  | 11.45 |
| 18c0010 | 0.26  | 10.99 | um02271 | 0.26  | 10.84 |
| 18c0010 | -0.18 | 9.19  | um02272 | 0.15  | 13.34 |
| 18c0010 | -0.19 | 8.53  | um02273 | 0.94  | 12.76 |
| 18c0010 | -0.21 | 8.96  | um02274 | 0.50  | 10.45 |
| 18c0010 | -0.40 | 11.15 | um02275 | 0.52  | 10.75 |
| 18c0010 | 0.19  | 8.83  | um02276 | 0.29  | 14.62 |
| 18d0000 | 0.31  | 10.87 | um02280 | 0.44  | 12.49 |
| 18d0000 | 0.02  | 9.53  | um02281 | 0.25  | 11.41 |
| 18d0000 | 0.45  | 12.64 | um02282 | 0.25  | 13.01 |
| 18d0000 | 0.25  | 11.81 | um02283 | -0.26 | 11.19 |
| 18d0000 | 0.87  | 11.61 | um02284 | -0.36 | 10.07 |
| 18d0000 | 0.04  | 8.49  | um02285 | -0.61 | 12.15 |
| 18d0000 | 0.24  | 9.97  | um02286 | 0.49  | 12.19 |
| 18d0000 | -0.02 | 8.61  | um02289 | -0.22 | 11.43 |
| 18d0000 | 0.33  | 9.55  | um02290 | -0.51 | 12.92 |
| 18d0001 | -0.04 | 10.91 | um02291 | -0.43 | 11.29 |

|         |       |       |         |       |       |
|---------|-------|-------|---------|-------|-------|
| 18d0001 | 1.40  | 14.80 | um02292 | 0.40  | 11.31 |
| 18d0001 | -0.15 | 11.78 | um02293 | -0.11 | 8.71  |
| 18d0001 | 0.55  | 13.26 | um02294 | -0.19 | 8.56  |
| 18d0001 | 0.08  | 10.51 | um02295 | -0.47 | 8.60  |
| 18d0001 | -0.35 | 13.30 | um02296 | -0.25 | 9.18  |
| 18d0001 | -0.21 | 11.75 | um02297 | 0.34  | 10.65 |
| 18d0001 | 0.66  | 12.80 | um02298 | -0.20 | 9.49  |
| 18d0001 | 0.40  | 13.27 | um02299 | -0.11 | 8.71  |
| 18d0001 | -0.12 | 13.38 | um02300 | -0.69 | 13.04 |
| 18d0002 | -0.53 | 12.11 | um02301 | 0.10  | 14.71 |
| 18d0002 | -1.54 | 12.68 | um02302 | 0.47  | 11.81 |
| 18d0002 | -1.11 | 14.07 | um02304 | -0.63 | 10.20 |
| 18d0002 | -1.03 | 12.72 | um02305 | 0.15  | 12.84 |
| 18d0002 | -0.02 | 13.45 | um02308 | 0.19  | 10.86 |
| 18d0002 | -0.08 | 8.96  | um02310 | 0.19  | 11.94 |
| 18d0002 | 0.49  | 12.59 | um02311 | -0.06 | 10.97 |
| 18d0002 | 0.04  | 9.04  | um02312 | 0.41  | 11.56 |
| 18d0002 | 0.32  | 12.81 | um02313 | 0.06  | 8.82  |
| 18d0002 | 0.17  | 12.56 | um02314 | -0.57 | 9.42  |
| 18d0003 | -0.40 | 13.18 | um02316 | 0.56  | 11.49 |
| 18d0003 | -0.34 | 12.51 | um02318 | 0.62  | 11.33 |
| 18d0003 | -0.05 | 9.25  | um02320 | -0.19 | 13.72 |
| 18d0003 | -0.42 | 12.22 | um02321 | -0.21 | 10.25 |
| 18d0003 | 0.29  | 9.22  | um02323 | 0.36  | 12.69 |
| 18d0003 | 0.24  | 12.64 | um02324 | 0.59  | 12.33 |
| 18d0003 | 0.03  | 12.57 | um02325 | 0.63  | 10.34 |
| 18d0003 | 0.09  | 12.53 | um02326 | 0.35  | 12.10 |
| 18d0003 | 0.46  | 12.51 | um02327 | -0.13 | 10.80 |
| 18d0003 | -0.19 | 12.91 | um02331 | -0.50 | 12.90 |
| 18d0004 | 0.34  | 12.08 | um02332 | -0.71 | 9.31  |
| 18d0004 | 0.81  | 13.26 | um02333 | 0.50  | 9.96  |
| 18d0004 | 0.10  | 12.32 | um02336 | 0.97  | 11.97 |
| 18d0004 | -0.53 | 10.74 | um02337 | -0.08 | 11.01 |
| 18d0004 | -0.55 | 11.82 | um02338 | 0.32  | 11.88 |
| 18d0004 | 0.03  | 11.08 | um02340 | -0.33 | 12.74 |
| 18d0004 | -0.01 | 9.34  | um02341 | -0.35 | 12.07 |
| 18d0004 | -0.35 | 13.01 | um02342 | -0.16 | 10.72 |
| 18d0004 | 0.04  | 9.24  | um02343 | 0.07  | 11.44 |
| 18d0004 | 0.43  | 11.00 | um02344 | -0.13 | 12.01 |
| 18d0005 | 0.04  | 12.27 | um02345 | -0.54 | 10.26 |
| 18d0005 | 0.12  | 11.77 | um02346 | 0.32  | 11.03 |
| 18d0005 | 0.12  | 12.04 | um02347 | -0.79 | 14.67 |
| 18d0005 | -0.10 | 13.12 | um02350 | -0.31 | 13.42 |
| 18d0005 | 0.10  | 12.69 | um02351 | 0.03  | 11.71 |
| 18d0005 | -0.50 | 13.61 | um02353 | 0.13  | 15.21 |
| 18d0005 | 0.33  | 11.39 | um02354 | 0.30  | 11.50 |
| 18d0005 | -0.05 | 9.02  | um02356 | 0.28  | 11.93 |
| 18d0005 | -0.10 | 10.19 | um02357 | 0.04  | 12.93 |
| 18d0005 | -0.28 | 10.77 | um02358 | 0.21  | 11.63 |
| 18d0006 | -0.37 | 11.90 | um02360 | -0.39 | 14.43 |
| 18d0006 | -0.19 | 11.04 | um02361 | -0.06 | 15.32 |
| 18d0006 | 0.12  | 13.26 | um02363 | 1.02  | 9.78  |
| 18d0006 | -0.25 | 15.50 | um02365 | -0.16 | 12.25 |
| 18d0006 | -0.43 | 12.82 | um02366 | 0.51  | 11.61 |



|         |       |       |         |       |       |
|---------|-------|-------|---------|-------|-------|
| 18d0006 | 0.06  | 8.78  | um02367 | 0.08  | 11.02 |
| 18d0006 | 0.14  | 8.52  | um02370 | -0.18 | 8.63  |
| 18d0006 | 0.01  | 8.86  | um02371 | 1.72  | 13.77 |
| 18d0006 | 0.23  | 12.23 | um02374 | -0.47 | 10.50 |
| 18d0006 | 0.13  | 11.81 | um02375 | -0.38 | 12.64 |
| 18d0007 | 0.48  | 12.47 | um02376 | -0.16 | 11.99 |
| 18d0007 | 0.96  | 13.04 | um02377 | 0.52  | 14.24 |
| 18d0007 | -0.08 | 13.47 | um02378 | -0.10 | 12.15 |
| 18d0007 | -0.03 | 10.96 | um02379 | -0.07 | 8.70  |
| 18d0007 | 0.24  | 13.74 | um02380 | 0.59  | 11.22 |
| 18d0007 | 0.04  | 13.41 | um02381 | -0.71 | 13.96 |
| 18d0007 | 0.52  | 13.53 | um02382 | -1.00 | 10.15 |
| 18d0007 | 0.25  | 12.78 | um02383 | 0.70  | 10.61 |
| 18d0007 | -0.38 | 12.23 | um02384 | -0.33 | 13.79 |
| 18d0007 | 0.25  | 13.39 | um02385 | -0.27 | 11.99 |
| 18d0008 | 0.01  | 12.38 | um02386 | -0.19 | 12.55 |
| 18d0008 | 0.52  | 12.37 | um02387 | -0.07 | 9.35  |
| 18d0008 | -0.69 | 13.91 | um02388 | -0.45 | 13.28 |
| 18d0008 | -0.52 | 12.11 | um02390 | -0.28 | 11.56 |
| 18d0008 | -0.08 | 10.65 | um02392 | 0.40  | 11.54 |
| 18d0008 | 0.21  | 10.53 | um02395 | 0.16  | 13.87 |
| 18d0008 | -0.35 | 11.64 | um02396 | 0.68  | 14.69 |
| 18d0008 | 0.60  | 12.36 | um02397 | 0.05  | 12.46 |
| 18d0008 | 0.00  | 12.16 | um02398 | -0.90 | 12.00 |
| 18d0008 | -0.17 | 9.12  | um02400 | 0.41  | 11.93 |
| 18d0009 | 1.06  | 14.48 | um02401 | 0.62  | 11.02 |
| 18d0009 | -0.08 | 11.12 | um02402 | 0.00  | 12.59 |
| 18d0009 | 0.45  | 12.05 | um02403 | -0.23 | 11.32 |
| 18d0009 | 0.47  | 13.20 | um02404 | -0.80 | 11.18 |
| 18d0009 | 0.49  | 13.21 | um02405 | -0.23 | 12.87 |
| 18d0009 | 0.29  | 13.28 | um02407 | -0.27 | 12.09 |
| 18d0009 | 0.23  | 11.81 | um02410 | 0.99  | 11.30 |
| 18d0009 | -0.07 | 13.47 | um02411 | -0.89 | 13.91 |
| 18d0009 | -0.19 | 10.00 | um02412 | 0.81  | 14.10 |
| 18d0009 | -0.03 | 12.02 | um02413 | 1.27  | 11.44 |
| 18d0010 | 0.16  | 12.85 | um02414 | 0.24  | 11.03 |
| 18d0010 | 0.43  | 10.87 | um02415 | -0.76 | 10.84 |
| 18d0010 | 0.02  | 11.85 | um02416 | 2.14  | 11.21 |
| 18d0010 | -0.04 | 8.58  | um02419 | 0.18  | 10.29 |
| 18d0010 | -0.05 | 10.71 | um02420 | 0.22  | 12.31 |
| 18d0010 | 0.09  | 11.30 | um02421 | -0.07 | 11.04 |
| 18d0010 | -0.31 | 9.64  | um02422 | -0.16 | 12.51 |
| 18d0010 | 0.01  | 8.71  | um02423 | -0.21 | 8.63  |
| 18d0010 | 0.03  | 8.62  | um02425 | 0.59  | 12.20 |
| 18d0010 | 0.15  | 10.03 | um02426 | -0.07 | 12.42 |
| 18d0011 | 0.19  | 9.01  | um02427 | 0.38  | 11.32 |
| 18d0011 | 0.00  | 8.44  | um02428 | 0.86  | 10.78 |
| 18d0011 | -1.91 | 11.32 | um02429 | 0.27  | 11.99 |
| 18d0011 | 0.04  | 8.64  | um02430 | 1.34  | 14.83 |
| 18d0011 | 0.02  | 8.62  | um02431 | 0.39  | 11.19 |
| 18d0011 | -0.35 | 8.99  | um02433 | 0.44  | 12.07 |
| 18d0011 | -0.03 | 8.50  | um02435 | -0.43 | 10.36 |
| 19c0000 | 0.54  | 15.69 | um02436 | -0.47 | 11.96 |
| 19c0000 | -0.95 | 14.88 | um02437 | -0.12 | 14.27 |

|         |       |       |         |       |       |
|---------|-------|-------|---------|-------|-------|
| 19c0000 | 0.00  | 11.32 | um02438 | -0.24 | 8.93  |
| 19c0000 | 0.01  | 8.55  | um02439 | 0.28  | 11.85 |
| 19c0000 | -1.92 | 12.47 | um02440 | 0.07  | 15.51 |
| 19c0000 | 0.31  | 12.25 | um02442 | -0.57 | 14.73 |
| 19c0000 | -0.07 | 8.63  | um02444 | 0.32  | 11.51 |
| 19c0000 | -0.13 | 10.85 | um02445 | -0.11 | 11.89 |
| 19c0000 | -0.85 | 12.37 | um02446 | 0.11  | 11.86 |
| 19c0001 | -0.10 | 10.07 | um02449 | 0.63  | 11.17 |
| 19c0001 | -0.07 | 10.16 | um02450 | -0.23 | 15.54 |
| 19c0001 | 0.07  | 12.14 | um02451 | 0.04  | 9.02  |
| 19c0001 | -0.01 | 11.87 | um02452 | 0.14  | 11.40 |
| 19c0001 | -0.25 | 10.56 | um02453 | -0.18 | 14.36 |
| 19c0001 | -0.04 | 8.75  | um02454 | -0.34 | 10.96 |
| 19c0001 | 0.09  | 13.34 | um02456 | -0.10 | 12.08 |
| 19c0001 | 0.38  | 11.56 | um02457 | -0.48 | 10.74 |
| 19c0001 | 0.10  | 11.84 | um02458 | 0.31  | 10.78 |
| 19c0001 | -0.07 | 13.36 | um02459 | 1.76  | 10.43 |
| 19c0002 | -0.08 | 10.30 | um02460 | 0.63  | 13.29 |
| 19c0002 | 0.07  | 14.68 | um02461 | 0.08  | 14.26 |
| 19c0002 | 0.15  | 12.57 | um02462 | 0.21  | 11.98 |
| 19c0002 | -0.21 | 11.23 | um02463 | 0.49  | 12.88 |
| 19c0002 | 0.25  | 9.93  | um02464 | 0.28  | 10.86 |
| 19c0002 | 0.25  | 10.88 | um02465 | -0.70 | 11.86 |
| 19c0002 | -0.26 | 10.13 | um02466 | -0.43 | 8.66  |
| 19c0002 | -0.26 | 11.97 | um02468 | 0.39  | 11.25 |
| 19c0002 | -0.01 | 8.74  | um02469 | -0.01 | 12.67 |
| 19c0002 | 0.61  | 11.49 | um02471 | -0.38 | 10.73 |
| 19c0003 | -0.04 | 9.47  | um02472 | -0.41 | 10.75 |
| 19c0003 | -0.07 | 9.88  | um02473 | -0.27 | 8.65  |
| 19c0003 | 0.22  | 11.15 | um02474 | -0.18 | 8.83  |
| 19c0003 | -0.22 | 10.19 | um02475 | -0.15 | 9.76  |
| 19c0003 | 0.42  | 11.43 | um02476 | -0.36 | 12.37 |
| 19c0003 | -0.29 | 12.56 | um02477 | 0.55  | 14.52 |
| 19c0003 | -0.34 | 12.40 | um02478 | -0.37 | 10.94 |
| 19c0003 | 0.06  | 8.64  | um02481 | 0.85  | 12.23 |
| 19c0003 | 0.27  | 11.47 | um02482 | 0.37  | 11.17 |
| 19c0003 | -0.06 | 10.76 | um02483 | 0.25  | 12.64 |
| 19c0004 | 0.11  | 8.96  | um02485 | -0.49 | 13.73 |
| 19c0004 | -0.15 | 12.24 | um02487 | 0.09  | 11.32 |
| 19c0004 | 0.43  | 11.91 | um02489 | -0.01 | 14.22 |
| 19c0004 | 0.12  | 11.16 | um02490 | 0.36  | 9.16  |
| 19c0004 | 0.72  | 11.18 | um02491 | -0.63 | 15.84 |
| 19c0004 | -1.83 | 12.82 | um02492 | -0.70 | 11.72 |
| 19c0004 | 0.04  | 9.12  | um02493 | -0.39 | 10.52 |
| 19c0004 | -0.09 | 11.87 | um02494 | 0.19  | 13.02 |
| 19c0004 | -0.21 | 12.50 | um02495 | -0.49 | 13.28 |
| 19c0004 | -0.43 | 11.98 | um02496 | -0.44 | 11.34 |
| 19c0005 | -0.20 | 12.33 | um02497 | -0.62 | 10.85 |
| 19c0005 | 0.30  | 13.02 | um02498 | -0.29 | 12.28 |
| 19c0005 | -0.03 | 8.81  | um02499 | -0.06 | 11.80 |
| 19c0005 | 0.08  | 12.20 | um02500 | 0.20  | 11.03 |
| 19c0005 | -0.11 | 11.72 | um02501 | -0.42 | 10.96 |
| 19c0005 | -0.34 | 11.28 | um02502 | -1.08 | 11.97 |
| 19c0005 | 0.00  | 11.90 | um02504 | 0.34  | 10.70 |

|         |       |       |         |       |       |
|---------|-------|-------|---------|-------|-------|
| 19c0005 | 0.05  | 12.90 | um02506 | 0.07  | 8.59  |
| 19c0005 | -0.15 | 14.14 | um02508 | 2.12  | 14.37 |
| 19c0005 | 0.45  | 10.10 | um02510 | -0.09 | 8.91  |
| 19c0006 | 0.11  | 11.78 | um02514 | 0.42  | 12.04 |
| 19c0006 | 0.07  | 9.99  | um02516 | 0.29  | 12.21 |
| 19c0006 | 0.49  | 13.33 | um02517 | 0.93  | 12.19 |
| 19c0006 | 0.47  | 10.68 | um02519 | 0.08  | 11.96 |
| 19c0006 | -0.28 | 12.57 | um02520 | 0.09  | 11.18 |
| 19c0006 | -0.07 | 9.33  | um02521 | 1.36  | 11.13 |
| 19c0006 | -0.01 | 12.38 | um02523 | -0.17 | 8.96  |
| 19c0006 | -0.15 | 12.81 | um02524 | -0.27 | 11.02 |
| 19c0006 | -0.43 | 10.16 | um02525 | 0.03  | 11.08 |
| 19c0006 | -0.32 | 11.80 | um02526 | 0.18  | 10.74 |
| 19c0007 | -0.29 | 13.94 | um02527 | -0.22 | 12.81 |
| 19c0007 | -0.16 | 12.00 | um02528 | 0.90  | 12.47 |
| 19c0007 | -0.53 | 13.71 | um02529 | 0.79  | 10.40 |
| 19c0007 | 0.16  | 13.45 | um02530 | -0.34 | 11.90 |
| 19c0007 | -0.49 | 13.83 | um02531 | 0.32  | 11.55 |
| 19c0007 | -0.23 | 11.36 | um02533 | -0.16 | 9.35  |
| 19c0007 | -0.20 | 13.86 | um02535 | -0.18 | 8.49  |
| 19c0007 | 0.06  | 12.29 | um02537 | -0.11 | 8.58  |
| 19c0007 | -0.34 | 13.72 | um02538 | -0.03 | 8.59  |
| 19c0007 | 0.07  | 9.05  | um02540 | -0.16 | 10.04 |
| 19c0008 | -0.33 | 12.82 | um02541 | -0.19 | 12.06 |
| 19c0008 | 0.24  | 11.94 | um02542 | 0.81  | 11.27 |
| 19c0008 | 0.01  | 12.62 | um02543 | 0.37  | 10.69 |
| 19c0008 | -0.17 | 12.02 | um02546 | 0.34  | 12.54 |
| 19c0008 | -0.27 | 11.35 | um02548 | -0.78 | 10.70 |
| 19c0008 | -0.18 | 12.34 | um02549 | -0.25 | 8.60  |
| 19c0008 | 0.12  | 12.93 | um02550 | 0.41  | 11.34 |
| 19c0008 | 0.31  | 13.28 | um02551 | -0.05 | 10.76 |
| 19c0008 | -0.56 | 13.40 | um02552 | -0.11 | 10.84 |
| 19c0008 | 0.45  | 15.04 | um02553 | 0.09  | 11.40 |
| 19c0009 | -0.21 | 11.12 | um02554 | 0.44  | 12.45 |
| 19c0009 | 0.13  | 11.49 | um02555 | 0.19  | 11.36 |
| 19c0009 | -0.02 | 12.16 | um02556 | -0.26 | 11.91 |
| 19c0009 | 0.00  | 8.61  | um02557 | -0.48 | 10.06 |
| 19c0009 | -0.10 | 12.27 | um02558 | 0.30  | 10.52 |
| 19c0009 | 0.00  | 9.54  | um02559 | -0.25 | 14.45 |
| 19c0009 | -0.31 | 13.11 | um02560 | -0.25 | 13.30 |
| 19c0009 | -0.08 | 8.82  | um02561 | 0.07  | 11.98 |
| 19c0009 | -0.56 | 14.57 | um02562 | -0.10 | 13.39 |
| 19c0009 | 0.66  | 12.64 | um02564 | -0.08 | 11.10 |
| 19c0010 | 0.15  | 11.55 | um02565 | 1.27  | 11.05 |
| 19c0010 | 0.20  | 11.36 | um02567 | 0.10  | 11.62 |
| 19c0010 | 0.30  | 12.55 | um02568 | -0.33 | 11.03 |
| 19c0010 | -0.10 | 11.87 | um02571 | 0.21  | 12.83 |
| 19c0010 | -0.14 | 9.63  | um02572 | -0.13 | 11.41 |
| 19c0010 | 0.32  | 13.56 | um02573 | 0.73  | 10.98 |
| 19c0010 | 0.09  | 8.73  | um02574 | 0.64  | 11.36 |
| 19c0010 | -0.30 | 12.55 | um02575 | -0.21 | 12.49 |
| 19c0010 | 0.19  | 13.17 | um02576 | -0.24 | 11.08 |
| 19c0010 | -0.32 | 12.26 | um02577 | -0.75 | 15.66 |
| 19c0011 | 0.16  | 12.42 | um02578 | -0.49 | 12.86 |

|         |       |       |         |       |       |
|---------|-------|-------|---------|-------|-------|
| 19c0011 | 0.22  | 11.66 | um02579 | -1.08 | 13.04 |
| 19c0011 | -0.28 | 14.67 | um02580 | -0.20 | 11.28 |
| 19c0011 | 0.19  | 12.14 | um02581 | 0.53  | 14.65 |
| 19c0011 | -0.04 | 10.06 | um02582 | -0.39 | 11.56 |
| 19c0011 | -0.75 | 13.10 | um02583 | -1.33 | 12.85 |
| 19c0011 | -0.03 | 12.34 | um02584 | -0.66 | 12.95 |
| 19c0011 | 0.12  | 12.34 | um02585 | -2.76 | 10.68 |
| 19c0011 | 0.08  | 11.06 | um02586 | -0.66 | 13.28 |
| 19c0011 | 0.21  | 10.35 | um02587 | -0.03 | 12.61 |
| 19c0012 | -0.05 | 8.92  | um02589 | 0.00  | 8.91  |
| 19c0012 | 0.06  | 11.64 | um02590 | 0.93  | 11.06 |
| 19c0012 | -0.28 | 9.80  | um02591 | 0.00  | 10.94 |
| 19c0012 | 0.13  | 10.63 | um02592 | 0.34  | 14.29 |
| 19c0012 | 0.34  | 11.74 | um02594 | 0.65  | 11.03 |
| 19c0012 | 0.35  | 10.69 | um02595 | 0.65  | 11.62 |
| 19c0012 | 0.22  | 15.39 | um02596 | -0.51 | 12.36 |
| 19c0012 | -0.63 | 11.58 | um02597 | 0.28  | 9.53  |
| 19c0012 | 0.47  | 12.25 | um02598 | -0.33 | 9.08  |
| 19c0012 | 0.21  | 12.12 | um02599 | -0.20 | 8.95  |
| 19c0013 | 0.15  | 13.76 | um02600 | -0.07 | 11.44 |
| 19c0013 | -0.06 | 9.55  | um02601 | -0.27 | 8.92  |
| 19c0013 | -0.22 | 8.88  | um02602 | 0.61  | 11.37 |
| 19c0013 | -0.15 | 11.77 | um02603 | 0.46  | 11.31 |
| 19c0013 | -0.31 | 11.66 | um02604 | -0.25 | 8.71  |
| 19c0013 | 0.16  | 9.75  | um02605 | 0.49  | 11.40 |
| 19c0013 | -0.02 | 12.33 | um02606 | 0.12  | 11.55 |
| 19c0013 | -0.22 | 12.07 | um02607 | 0.28  | 12.11 |
| 19c0013 | 0.11  | 13.34 | um02609 | -0.04 | 12.81 |
| 19c0013 | 0.47  | 12.89 | um02610 | 1.09  | 12.05 |
| 19c0014 | -0.05 | 11.65 | um02611 | -0.66 | 13.68 |
| 19c0014 | -0.21 | 10.73 | um02613 | -0.33 | 11.41 |
| 19c0014 | 0.17  | 12.45 | um02614 | -0.05 | 11.75 |
| 19c0014 | -0.20 | 11.36 | um02615 | 0.05  | 9.73  |
| 19c0014 | 0.15  | 12.17 | um02618 | 0.60  | 10.99 |
| 19c0014 | -0.24 | 10.91 | um02619 | -0.07 | 10.94 |
| 19c0014 | -1.15 | 12.65 | um02620 | -0.09 | 13.23 |
| 19c0014 | -0.20 | 11.26 | um02622 | -0.02 | 13.73 |
| 19c0014 | -0.17 | 10.94 | um02623 | -0.17 | 11.66 |
| 19c0014 | 0.00  | 11.99 | um02624 | 0.60  | 12.85 |
| 19c0015 | -0.08 | 9.71  | um02625 | -4.48 | 10.88 |
| 19d0000 | 0.40  | 13.91 | um02626 | -4.44 | 11.11 |
| 19d0000 | 0.34  | 15.72 | um02627 | 0.17  | 10.39 |
| 19d0000 | -0.04 | 15.92 | um02628 | -0.40 | 10.99 |
| 19d0000 | 0.00  | 15.92 | um02629 | -0.46 | 8.73  |
| 19d0000 | 0.38  | 9.61  | um02630 | -0.63 | 12.50 |
| 19d0000 | -0.86 | 11.51 | um02631 | 0.02  | 11.64 |
| 19d0000 | 0.38  | 10.92 | um02632 | -0.53 | 12.18 |
| 19d0000 | 0.07  | 9.80  | um02635 | -0.37 | 11.68 |
| 19d0000 | -1.48 | 14.29 | um02637 | -0.04 | 12.61 |
| 19d0001 | -0.66 | 12.98 | um02638 | -0.03 | 11.72 |
| 19d0001 | 0.20  | 12.82 | um02639 | -0.46 | 12.65 |
| 19d0001 | 0.21  | 12.14 | um02640 | 1.05  | 12.79 |
| 19d0001 | -0.38 | 14.53 | um02641 | 1.16  | 12.09 |
| 19d0001 | -0.21 | 14.24 | um02642 | -1.22 | 13.56 |

|         |       |       |         |       |       |
|---------|-------|-------|---------|-------|-------|
| 19d0001 | -0.29 | 11.25 | um02645 | 0.33  | 11.59 |
| 19d0001 | 0.01  | 8.86  | um02646 | 0.35  | 11.29 |
| 19d0001 | -0.09 | 10.52 | um02651 | -0.06 | 13.01 |
| 19d0001 | -0.13 | 10.97 | um02652 | 1.21  | 14.15 |
| 19d0001 | 0.48  | 11.72 | um02653 | -0.44 | 12.45 |
| 19d0002 | 0.74  | 12.89 | um02654 | 0.66  | 10.77 |
| 19d0002 | 0.26  | 13.71 | um02655 | 0.68  | 11.10 |
| 19d0002 | 0.56  | 12.32 | um02656 | 0.04  | 11.22 |
| 19d0002 | 0.53  | 11.44 | um02657 | -0.07 | 11.55 |
| 19d0002 | 0.63  | 13.29 | um02658 | -0.25 | 11.05 |
| 19d0002 | -0.10 | 8.94  | um02662 | 0.35  | 11.47 |
| 19d0002 | -0.28 | 14.63 | um02663 | -0.04 | 12.30 |
| 19d0002 | -0.25 | 14.43 | um02664 | 0.02  | 11.11 |
| 19d0002 | 1.01  | 10.33 | um02665 | -0.34 | 13.98 |
| 19d0002 | 0.11  | 8.75  | um02666 | -0.22 | 13.80 |
| 19d0003 | -0.27 | 11.76 | um02667 | 0.05  | 11.59 |
| 19d0003 | -0.04 | 9.17  | um02668 | -0.64 | 11.75 |
| 19d0003 | 0.23  | 11.83 | um02669 | 0.68  | 12.25 |
| 19d0003 | 0.01  | 13.39 | um02672 | -0.18 | 13.04 |
| 19d0003 | 0.22  | 9.95  | um02674 | 0.43  | 10.92 |
| 19d0003 | -0.05 | 14.51 | um02676 | 0.43  | 11.49 |
| 19d0003 | 0.84  | 13.45 | um02677 | 0.34  | 11.11 |
| 19d0003 | 0.13  | 8.59  | um02678 | -0.59 | 12.46 |
| 19d0003 | -0.04 | 12.40 | um02682 | 0.51  | 11.03 |
| 19d0003 | 0.18  | 13.89 | um02683 | 0.24  | 10.55 |
| 19d0004 | 0.47  | 13.30 | um02684 | -0.17 | 12.59 |
| 19d0004 | -0.58 | 13.22 | um02685 | 0.17  | 10.52 |
| 19d0004 | -0.21 | 10.94 | um02686 | -0.43 | 11.59 |
| 19d0004 | -0.09 | 11.28 | um02687 | -0.02 | 12.21 |
| 19d0004 | 0.00  | 12.22 | um02688 | -0.08 | 11.48 |
| 19d0004 | 0.52  | 12.91 | um02690 | -0.31 | 9.76  |
| 19d0004 | -0.85 | 12.41 | um02693 | -0.79 | 13.18 |
| 19d0004 | -0.39 | 14.02 | um02694 | 0.70  | 11.75 |
| 19d0004 | 0.39  | 12.28 | um02696 | 0.06  | 12.26 |
| 19d0004 | -0.41 | 12.99 | um02697 | 0.02  | 11.88 |
| 19d0005 | -0.19 | 12.60 | um02700 | -0.02 | 11.25 |
| 19d0005 | 0.01  | 10.10 | um02701 | 3.38  | 12.62 |
| 19d0005 | 0.20  | 11.80 | um02703 | 0.71  | 13.83 |
| 19d0005 | 0.20  | 12.71 | um02704 | 1.89  | 11.89 |
| 19d0005 | 0.17  | 9.58  | um02707 | 2.04  | 13.82 |
| 19d0005 | -0.15 | 9.62  | um02708 | 1.11  | 14.06 |
| 19d0005 | -0.46 | 11.74 | um02709 | -0.85 | 13.00 |
| 19d0005 | 0.93  | 13.18 | um02710 | -0.80 | 15.67 |
| 19d0005 | 0.19  | 13.22 | um02711 | 0.11  | 11.20 |
| 19d0005 | -0.93 | 12.72 | um02712 | 0.72  | 13.22 |
| 19d0006 | 0.06  | 10.86 | um02713 | 0.15  | 10.12 |
| 19d0006 | -0.29 | 10.37 | um02715 | 0.24  | 14.84 |
| 19d0006 | 0.29  | 11.53 | um02716 | 0.62  | 11.03 |
| 19d0006 | 0.45  | 12.19 | um02717 | -0.14 | 13.15 |
| 19d0006 | -0.40 | 12.53 | um02718 | -0.24 | 11.33 |
| 19d0006 | -0.33 | 11.44 | um02719 | 0.24  | 12.46 |
| 19d0006 | 0.07  | 11.07 | um02720 | -2.32 | 12.49 |
| 19d0006 | 0.02  | 12.40 | um02721 | -1.27 | 11.43 |
| 19d0006 | -0.41 | 11.51 | um02722 | -0.09 | 8.58  |

|         |       |       |         |       |       |
|---------|-------|-------|---------|-------|-------|
| 19d0006 | 0.30  | 13.12 | um02723 | -0.63 | 9.40  |
| 19d0007 | 0.43  | 13.33 | um02724 | -0.37 | 11.26 |
| 19d0007 | 0.21  | 13.32 | um02725 | 0.07  | 11.03 |
| 19d0007 | -0.19 | 12.80 | um02727 | 0.42  | 11.95 |
| 19d0007 | -0.70 | 12.48 | um02729 | -0.25 | 11.87 |
| 19d0007 | 0.24  | 10.09 | um02730 | -0.35 | 12.56 |
| 19d0007 | 0.16  | 12.14 | um02731 | -0.13 | 11.75 |
| 19d0007 | -0.97 | 11.54 | um02732 | -0.38 | 12.33 |
| 19d0007 | -0.89 | 9.94  | um02733 | -0.14 | 12.37 |
| 19d0007 | -0.07 | 11.51 | um02736 | -0.02 | 11.77 |
| 19d0007 | -0.40 | 13.61 | um02739 | -0.22 | 11.80 |
| 19d0008 | -0.32 | 11.32 | um02740 | 0.47  | 9.61  |
| 19d0008 | -0.48 | 12.41 | um02741 | -0.92 | 11.27 |
| 19d0008 | -0.12 | 12.08 | um02742 | 0.42  | 12.42 |
| 19d0008 | 0.02  | 10.68 | um02743 | -0.36 | 12.55 |
| 19d0008 | -0.09 | 11.35 | um02744 | -0.60 | 11.83 |
| 19d0008 | 0.08  | 12.11 | um02745 | -0.24 | 8.91  |
| 19d0008 | 0.11  | 11.15 | um02746 | 1.82  | 12.33 |
| 19d0008 | 0.53  | 12.73 | um02747 | 1.92  | 12.28 |
| 19d0008 | 0.20  | 13.91 | um02750 | -0.39 | 14.21 |
| 19d0008 | 0.54  | 12.78 | um02751 | 0.02  | 10.85 |
| 19d0009 | 0.25  | 10.90 | um02752 | -0.34 | 10.04 |
| 19d0009 | -0.82 | 13.40 | um02753 | 1.22  | 9.78  |
| 19d0009 | 0.06  | 9.79  | um02754 | -0.35 | 13.55 |
| 19d0009 | 0.16  | 12.29 | um02755 | 0.11  | 11.52 |
| 19d0009 | -0.61 | 11.19 | um02756 | -0.14 | 8.96  |
| 19d0009 | 0.03  | 10.83 | um02757 | 0.06  | 9.00  |
| 19d0009 | -0.02 | 9.56  | um02758 | -0.57 | 8.89  |
| 19d0009 | 0.64  | 12.05 | um02759 | -0.07 | 8.75  |
| 19d0009 | -0.73 | 11.48 | um02760 | -0.49 | 10.64 |
| 19d0009 | -0.26 | 12.36 | um02762 | 0.23  | 11.03 |
| 19d0010 | 0.05  | 12.68 | um02763 | 0.71  | 14.54 |
| 19d0010 | 0.16  | 12.14 | um02765 | 0.83  | 11.32 |
| 19d0010 | 0.57  | 13.63 | um02768 | -0.47 | 11.52 |
| 19d0010 | 0.57  | 9.15  | um02769 | 0.22  | 13.48 |
| 19d0010 | -0.11 | 12.25 | um02770 | 0.29  | 9.04  |
| 19d0010 | -0.28 | 10.75 | um02771 | 0.59  | 11.84 |
| 19d0010 | -0.20 | 14.17 | um02772 | 0.21  | 11.86 |
| 19d0010 | -0.12 | 13.68 | um02773 | 0.24  | 15.32 |
| 19d0010 | -0.14 | 11.13 | um02774 | 0.21  | 12.19 |
| 19d0010 | -0.18 | 9.14  | um02775 | -0.26 | 10.11 |
| 19d0011 | 0.71  | 11.92 | um02777 | -0.11 | 11.99 |
| 19d0011 | 0.36  | 12.71 | um02778 | 0.67  | 13.59 |
| 19d0011 | -0.20 | 15.82 | um02779 | -0.32 | 10.35 |
| 19d0011 | 0.13  | 13.00 | um02782 | -0.17 | 13.86 |
| 19d0011 | 0.05  | 11.15 | um02783 | -0.72 | 13.70 |
| 19d0011 | 0.05  | 12.65 | um02784 | 0.14  | 10.93 |
| 19d0011 | 0.47  | 12.83 | um02786 | 0.40  | 9.99  |
| 19d0011 | 0.36  | 13.58 | um02787 | 0.54  | 9.70  |
| 19d0011 | 0.29  | 13.24 | um02788 | -0.20 | 8.64  |
| 19d0011 | 0.06  | 8.67  | um02789 | 0.30  | 9.35  |
| 19d0012 | -0.18 | 11.77 | um02791 | -1.37 | 12.33 |
| 19d0012 | -0.11 | 8.66  | um02792 | 0.29  | 12.32 |
| 19d0012 | -0.32 | 12.36 | um02793 | 0.51  | 9.69  |

|         |       |       |         |       |       |
|---------|-------|-------|---------|-------|-------|
| 19d0012 | -0.04 | 10.92 | um02794 | 0.00  | 13.18 |
| 19d0012 | 0.12  | 11.76 | um02796 | -1.29 | 13.54 |
| 19d0012 | 0.45  | 13.32 | um02797 | -0.44 | 12.84 |
| 19d0012 | -1.00 | 13.60 | um02799 | 0.42  | 12.86 |
| 19d0012 | 0.87  | 14.94 | um02801 | -2.08 | 14.98 |
| 19d0012 | 1.19  | 11.70 | um02802 | -0.36 | 11.30 |
| 19d0012 | -1.04 | 12.41 | um02803 | -0.37 | 9.35  |
| 19d0013 | 0.36  | 12.14 | um02804 | -0.19 | 9.68  |
| 19d0013 | 0.08  | 8.92  | um02807 | -0.25 | 8.62  |
| 19d0013 | -0.11 | 10.26 | um02808 | 0.29  | 10.22 |
| 19d0013 | -0.41 | 11.92 | um02809 | -1.64 | 11.95 |
| 19d0013 | -0.16 | 9.53  | um02810 | -0.78 | 13.26 |
| 19d0013 | 0.12  | 9.82  | um02811 | -2.70 | 12.06 |
| 19d0013 | 0.00  | 11.23 | um02812 | -0.24 | 8.58  |
| 19d0013 | -0.36 | 12.06 | um02813 | 1.23  | 9.94  |
| 19d0013 | 0.51  | 10.90 | um02814 | 0.04  | 9.13  |
| 19d0013 | -0.27 | 13.06 | um02816 | 0.39  | 11.34 |
| 19d0014 | 0.46  | 12.50 | um02817 | 0.66  | 9.52  |
| 19d0014 | 0.25  | 11.19 | um02818 | 0.83  | 9.82  |
| 19d0014 | -0.28 | 11.15 | um02819 | 0.94  | 11.01 |
| 19d0014 | 0.32  | 13.38 | um02820 | -0.96 | 9.41  |
| 19d0014 | 0.34  | 13.04 | um02821 | -0.49 | 10.07 |
| 19d0014 | -0.10 | 9.24  | um02823 | -0.27 | 10.13 |
| 19d0014 | 0.02  | 8.66  | um02824 | -0.18 | 11.27 |
| 19d0014 | -0.01 | 8.46  | um02825 | -0.52 | 11.62 |
| 19d0014 | -0.10 | 8.87  | um02826 | -0.25 | 8.66  |
| 19d0014 | 0.00  | 8.40  | um02827 | 0.30  | 12.22 |
| 19d0015 | -0.27 | 8.68  | um02828 | -0.05 | 11.27 |
| 19d0015 | -0.15 | 9.90  | um02829 | -0.02 | 11.02 |
| 19d0015 | 0.07  | 9.78  | um02830 | -0.10 | 11.66 |
| 19d0015 | 0.00  | 12.58 | um02833 | -0.37 | 12.79 |
| 19d0015 | -0.45 | 13.50 | um02835 | -0.98 | 12.73 |
| 19d0015 | -0.19 | 13.29 | um02836 | 1.36  | 9.68  |
| 19d0015 | 0.06  | 8.78  | um02838 | 1.01  | 12.14 |
| 19d0015 | 0.02  | 11.80 | um02840 | 0.09  | 11.78 |
| 19d0015 | -0.13 | 11.51 | um02843 | -0.66 | 12.66 |
| 19d0015 | -0.56 | 12.30 | um02844 | 0.05  | 12.18 |
| 19d0016 | 0.13  | 12.83 | um02845 | -0.33 | 11.18 |
| 19d0016 | 0.02  | 12.26 | um02846 | -0.37 | 11.53 |
| 19d0016 | 0.12  | 12.91 | um02847 | 0.28  | 10.79 |
| 19d0016 | 0.00  | 12.35 | um02849 | -0.28 | 12.00 |
| 19d0016 | -0.06 | 11.34 | um02850 | 0.01  | 10.34 |
| 19d0016 | -0.27 | 11.90 | um02851 | 0.09  | 9.17  |
| 1c00001 | 0.17  | 9.06  | um02852 | -0.47 | 8.70  |
| 1c00002 | 0.06  | 13.99 | um02853 | -0.26 | 8.36  |
| 1c00003 | 0.28  | 13.10 | um02854 | -0.25 | 8.64  |
| 1c00004 | 0.48  | 11.62 | um02855 | -0.18 | 11.62 |
| 1c00005 | -0.14 | 12.79 | um02856 | -0.21 | 12.21 |
| 1c00006 | 0.14  | 9.19  | um02857 | 0.11  | 11.58 |
| 1c00007 | 0.15  | 10.89 | um02859 | -0.53 | 12.52 |
| 1c00008 | 0.12  | 11.78 | um02860 | -0.17 | 12.77 |
| 1c00009 | 0.35  | 12.75 | um02861 | -0.09 | 11.97 |
| 1c00010 | 0.41  | 12.63 | um02862 | 0.51  | 11.80 |
| 1c00011 | -0.42 | 13.81 | um02863 | 0.48  | 10.83 |

|         |       |       |         |       |       |
|---------|-------|-------|---------|-------|-------|
| 1c00012 | 0.13  | 11.85 | um02864 | 0.42  | 10.86 |
| 1c00013 | -0.27 | 10.72 | um02865 | 2.29  | 13.29 |
| 1c00014 | 0.46  | 12.20 | um02867 | -0.27 | 13.08 |
| 1c00015 | -0.27 | 12.78 | um02868 | -0.11 | 10.82 |
| 1c00016 | -0.67 | 11.63 | um02869 | 0.34  | 12.03 |
| 1c00017 | -0.91 | 12.29 | um02874 | -0.25 | 10.31 |
| 1c00018 | -0.23 | 11.49 | um02876 | 0.74  | 12.73 |
| 1c00019 | 0.58  | 13.56 | um02877 | -0.35 | 8.85  |
| 1c00020 | 0.02  | 10.07 | um02878 | -0.30 | 11.48 |
| 1c00021 | 0.05  | 10.54 | um02879 | 0.41  | 10.59 |
| 1c00022 | 0.56  | 13.18 | um02880 | 0.97  | 11.49 |
| 1c00023 | -0.02 | 9.81  | um02881 | 0.17  | 11.32 |
| 1c00024 | -0.09 | 11.13 | um02883 | 0.03  | 13.37 |
| 1c00025 | 0.02  | 12.37 | um02884 | 0.45  | 12.52 |
| 1c00026 | 0.43  | 12.17 | um02886 | 0.36  | 10.88 |
| 1c00027 | -0.39 | 12.41 | um02887 | 0.70  | 11.59 |
| 1c00028 | -0.57 | 12.81 | um02888 | 0.31  | 10.60 |
| 1c00029 | 0.08  | 12.74 | um02889 | 0.26  | 12.30 |
| 1c00030 | -0.14 | 11.94 | um02890 | -0.13 | 11.28 |
| 1c00031 | -0.20 | 12.16 | um02891 | -0.26 | 11.85 |
| 1c00032 | -0.25 | 12.29 | um02895 | -0.04 | 12.20 |
| 1c00033 | -0.34 | 9.44  | um02896 | 0.28  | 11.65 |
| 1c00034 | -0.18 | 9.35  | um02899 | 0.68  | 14.56 |
| 1c00035 | 0.95  | 12.77 | um02900 | 0.40  | 12.67 |
| 1c00036 | 0.39  | 14.60 | um02901 | 0.20  | 9.18  |
| 1c00037 | 0.07  | 13.08 | um02902 | 0.15  | 11.31 |
| 1c00038 | -0.52 | 11.89 | um02903 | 0.71  | 11.72 |
| 1c00039 | -0.34 | 12.45 | um02904 | -0.03 | 11.40 |
| 1c00040 | -0.02 | 13.52 | um02905 | -0.66 | 13.26 |
| 1c00041 | 1.37  | 11.90 | um02910 | 0.25  | 11.80 |
| 1c00042 | 0.04  | 9.56  | um02911 | 0.24  | 12.28 |
| 1c00043 | -0.37 | 12.84 | um02912 | -0.43 | 12.29 |
| 1c00044 | -0.12 | 10.44 | um02913 | 0.01  | 10.75 |
| 1c00045 | 0.18  | 12.58 | um02915 | -1.01 | 10.66 |
| 1c00046 | -0.06 | 11.61 | um02917 | -1.99 | 14.46 |
| 1c00047 | 0.70  | 12.99 | um02919 | 0.05  | 11.54 |
| 1c00048 | -0.26 | 9.56  | um02920 | 0.52  | 11.56 |
| 1c00049 | 0.04  | 10.03 | um02921 | 1.12  | 11.20 |
| 1c00050 | 0.10  | 10.62 | um02922 | -0.92 | 12.09 |
| 1c00051 | -0.36 | 13.33 | um02923 | -2.35 | 11.88 |
| 1c00052 | -0.22 | 11.85 | um02924 | 0.21  | 14.57 |
| 1d00001 | 0.17  | 9.11  | um02925 | -0.07 | 9.74  |
| 1d00002 | 0.44  | 11.84 | um02926 | -0.06 | 13.88 |
| 1d00003 | -1.27 | 11.73 | um02927 | -0.14 | 8.86  |
| 1d00004 | 0.24  | 10.50 | um02929 | -0.58 | 12.76 |
| 1d00005 | 0.12  | 14.15 | um02933 | 0.72  | 11.20 |
| 1d00006 | 0.15  | 8.78  | um02935 | -0.99 | 10.21 |
| 1d00007 | 0.84  | 10.41 | um02936 | -0.11 | 11.20 |
| 1d00008 | 0.04  | 10.39 | um02937 | 0.20  | 11.78 |
| 1d00009 | -0.21 | 11.36 | um02938 | 0.29  | 11.22 |
| 1d00010 | -0.39 | 11.55 | um02942 | -1.01 | 11.80 |
| 1d00011 | -0.13 | 12.16 | um02944 | 0.15  | 11.53 |
| 1d00012 | 0.20  | 10.94 | um02945 | -0.37 | 11.45 |
| 1d00013 | 0.28  | 14.22 | um02948 | 0.44  | 11.51 |



|         |       |       |         |       |       |
|---------|-------|-------|---------|-------|-------|
| 1d00014 | 0.33  | 13.45 | um02950 | 0.92  | 11.79 |
| 1d00015 | -0.24 | 12.65 | um02951 | 0.18  | 10.65 |
| 1d00016 | 0.46  | 12.14 | um02954 | -1.04 | 10.82 |
| 1d00017 | 1.08  | 14.21 | um02955 | 0.36  | 14.44 |
| 1d00018 | 0.20  | 12.07 | um02957 | 0.49  | 11.79 |
| 1d00019 | -0.04 | 12.21 | um02958 | 0.16  | 12.07 |
| 1d00020 | -0.18 | 11.13 | um02959 | -0.98 | 15.45 |
| 1d00021 | -0.02 | 10.50 | um02960 | -0.21 | 12.95 |
| 1d00022 | -0.59 | 11.81 | um02961 | 0.34  | 11.19 |
| 1d00023 | 0.05  | 15.02 | um02962 | -0.33 | 12.43 |
| 1d00024 | 0.26  | 11.56 | um02966 | 0.11  | 10.93 |
| 1d00025 | -0.11 | 11.99 | um02967 | -0.96 | 14.06 |
| 1d00026 | 0.20  | 9.77  | um02968 | -0.04 | 11.86 |
| 1d00027 | -0.31 | 12.18 | um02972 | -0.49 | 12.86 |
| 1d00028 | -0.23 | 12.76 | um02974 | 1.03  | 10.75 |
| 1d00029 | -0.03 | 13.79 | um02976 | -0.60 | 11.90 |
| 1d00030 | 0.04  | 12.40 | um02978 | 1.14  | 13.82 |
| 1d00031 | -0.13 | 9.79  | um02979 | 0.32  | 10.79 |
| 1d00032 | 0.25  | 10.08 | um02980 | 0.93  | 10.26 |
| 1d00033 | -0.03 | 13.30 | um02981 | -0.41 | 9.25  |
| 1d00034 | -0.13 | 10.11 | um02982 | -0.11 | 11.07 |
| 1d00035 | 0.30  | 12.56 | um02983 | 0.11  | 10.31 |
| 1d00036 | -0.13 | 11.19 | um02984 | -5.11 | 11.55 |
| 1d00037 | -0.21 | 12.61 | um02985 | 0.22  | 13.18 |
| 1d00038 | -0.15 | 10.37 | um02986 | 1.87  | 13.02 |
| 1d00039 | -0.22 | 14.09 | um02989 | 0.19  | 12.12 |
| 1d00040 | -1.75 | 14.97 | um02990 | 0.34  | 11.96 |
| 1d00041 | 0.87  | 13.31 | um02993 | -0.31 | 11.20 |
| 1d00042 | 0.07  | 8.64  | um02994 | -1.18 | 11.74 |
| 1d00043 | 0.10  | 8.72  | um02998 | -0.43 | 11.95 |
| 1d00044 | 0.14  | 11.43 | um02999 | 0.06  | 13.74 |
| 1d00045 | 0.03  | 8.66  | um03000 | 0.32  | 11.98 |
| 1d00046 | -0.09 | 10.22 | um03001 | 0.24  | 11.31 |
| 1d00047 | -0.16 | 11.99 | um03002 | 1.18  | 14.32 |
| 1d00048 | 0.64  | 10.07 | um03003 | 0.21  | 13.04 |
| 1d00049 | 0.88  | 11.84 | um03006 | -0.69 | 14.47 |
| 1d00050 | 0.11  | 9.76  | um03007 | 0.50  | 12.09 |
| 1d00051 | 0.04  | 12.65 | um03009 | -0.11 | 14.08 |
| 20c0000 | -0.19 | 10.50 | um03010 | -0.22 | 12.34 |
| 20c0000 | -0.22 | 10.91 | um03011 | -0.30 | 10.93 |
| 20c0000 | -0.70 | 9.53  | um03013 | 0.53  | 11.58 |
| 20c0000 | 0.03  | 9.71  | um03015 | 0.99  | 12.07 |
| 20c0000 | 0.08  | 11.49 | um03016 | 1.27  | 11.92 |
| 20c0000 | 0.28  | 10.52 | um03017 | -0.29 | 12.61 |
| 20c0000 | 0.08  | 13.35 | um03018 | 0.03  | 11.45 |
| 20c0000 | -0.31 | 14.31 | um03019 | -0.12 | 11.51 |
| 20c0000 | -0.02 | 12.17 | um03020 | 0.47  | 10.60 |
| 20c0001 | -0.42 | 11.59 | um03023 | 0.56  | 10.24 |
| 20c0001 | -0.41 | 14.03 | um03024 | 0.28  | 9.08  |
| 20c0001 | -0.18 | 9.95  | um03025 | -0.63 | 11.13 |
| 20c0001 | -0.44 | 12.14 | um03027 | -0.26 | 10.50 |
| 20c0001 | -0.01 | 9.01  | um03028 | -0.20 | 11.77 |
| 20c0001 | -0.56 | 13.42 | um03029 | -0.48 | 12.23 |
| 20c0001 | 0.50  | 10.75 | um03032 | 1.39  | 14.39 |

|         |       |       |         |       |       |
|---------|-------|-------|---------|-------|-------|
| 20c0001 | 0.32  | 11.48 | um03033 | 0.36  | 11.78 |
| 20c0001 | 0.00  | 9.47  | um03034 | 1.21  | 14.44 |
| 20c0001 | -0.01 | 9.39  | um03035 | -0.43 | 10.76 |
| 20c0002 | 0.11  | 8.68  | um03036 | -0.13 | 10.56 |
| 20c0002 | 0.44  | 11.78 | um03037 | -0.36 | 11.85 |
| 20c0002 | 0.19  | 9.85  | um03038 | 0.09  | 11.44 |
| 20c0002 | 0.52  | 13.81 | um03039 | 0.02  | 9.04  |
| 20c0002 | 0.32  | 10.43 | um03040 | 2.42  | 12.60 |
| 20c0002 | 0.17  | 9.68  | um03042 | 0.21  | 11.53 |
| 20c0002 | -0.74 | 14.02 | um03044 | -0.19 | 11.63 |
| 20c0002 | -0.06 | 10.56 | um03045 | -0.15 | 12.80 |
| 20c0002 | -0.02 | 11.36 | um03046 | -0.19 | 8.60  |
| 20c0002 | 0.49  | 12.14 | um03047 | 0.22  | 10.56 |
| 20c0003 | -0.34 | 12.53 | um03049 | 0.42  | 9.57  |
| 20c0003 | -0.04 | 8.65  | um03050 | 0.18  | 11.65 |
| 20c0003 | -0.35 | 13.55 | um03055 | 0.24  | 11.71 |
| 20c0003 | -0.08 | 13.20 | um03057 | -0.12 | 11.48 |
| 20c0003 | -0.63 | 13.53 | um03058 | 0.26  | 11.83 |
| 20c0003 | -0.29 | 9.35  | um03061 | 0.59  | 11.84 |
| 20c0003 | -0.14 | 9.44  | um03062 | 0.05  | 11.01 |
| 20c0003 | -0.15 | 9.97  | um03063 | 1.26  | 11.02 |
| 20c0003 | -0.02 | 8.75  | um03064 | -0.12 | 11.19 |
| 20c0003 | -0.19 | 11.91 | um03065 | -0.50 | 8.82  |
| 20c0004 | 0.36  | 12.79 | um03066 | 0.52  | 9.54  |
| 20c0004 | 0.54  | 13.43 | um03067 | -1.48 | 9.88  |
| 20c0004 | 0.13  | 9.37  | um03068 | 1.05  | 13.27 |
| 20c0004 | 0.28  | 12.34 | um03069 | 1.03  | 15.08 |
| 20c0004 | 0.19  | 12.05 | um03070 | -0.16 | 11.15 |
| 20c0004 | -0.35 | 12.12 | um03071 | -0.13 | 13.23 |
| 20c0004 | 0.01  | 15.74 | um03073 | -0.41 | 11.32 |
| 20c0004 | 0.04  | 12.70 | um03074 | 0.23  | 14.42 |
| 20c0004 | -0.23 | 11.73 | um03076 | 0.52  | 10.63 |
| 20c0004 | 0.08  | 11.79 | um03078 | 0.59  | 12.50 |
| 20c0005 | -0.25 | 12.82 | um03079 | -0.24 | 11.33 |
| 20c0005 | -0.27 | 11.66 | um03080 | 0.12  | 13.97 |
| 20c0005 | -0.60 | 11.62 | um03081 | -0.55 | 11.30 |
| 20c0005 | 0.32  | 10.97 | um03082 | -0.45 | 11.85 |
| 20c0005 | 0.74  | 14.45 | um03083 | -0.49 | 14.64 |
| 20c0005 | 0.65  | 14.30 | um03085 | -0.53 | 15.22 |
| 20c0005 | -0.10 | 11.70 | um03088 | -0.73 | 12.51 |
| 20c0005 | -0.04 | 13.44 | um03089 | 0.05  | 11.35 |
| 20c0005 | 0.16  | 10.27 | um03090 | -0.32 | 8.49  |
| 20c0005 | -0.08 | 12.77 | um03091 | -0.13 | 8.56  |
| 20c0006 | -0.62 | 12.62 | um03092 | -0.26 | 9.00  |
| 20c0006 | 0.32  | 10.36 | um03095 | -0.67 | 10.97 |
| 20c0006 | 0.19  | 8.80  | um03096 | -0.32 | 11.63 |
| 20c0006 | -0.63 | 12.89 | um03097 | 0.35  | 11.38 |
| 20c0006 | 0.36  | 12.60 | um03098 | 0.31  | 11.01 |
| 20c0006 | -0.16 | 10.05 | um03099 | 0.26  | 11.55 |
| 20c0006 | 0.81  | 11.90 | um03100 | -0.30 | 13.46 |
| 20c0006 | -0.39 | 11.58 | um03102 | -0.21 | 11.38 |
| 20c0006 | 0.05  | 12.87 | um03103 | -0.74 | 14.65 |
| 20c0006 | -0.23 | 10.66 | um03105 | 0.87  | 10.56 |
| 20c0007 | -0.07 | 8.87  | um03108 | -0.61 | 12.29 |

|         |       |       |         |       |       |
|---------|-------|-------|---------|-------|-------|
| 20c0007 | -0.12 | 10.77 | um03110 | -6.11 | 12.45 |
| 20c0007 | 0.35  | 12.65 | um03112 | -0.24 | 8.77  |
| 20c0007 | -0.05 | 9.44  | um03113 | -0.53 | 11.68 |
| 20c0007 | -0.26 | 9.73  | um03114 | -1.19 | 11.02 |
| 20c0007 | 0.24  | 11.34 | um03115 | -0.33 | 14.07 |
| 20c0007 | -0.18 | 10.08 | um03116 | -1.97 | 13.18 |
| 20c0007 | -0.03 | 14.13 | um03117 | -2.23 | 11.53 |
| 20c0007 | 0.28  | 11.61 | um03120 | -1.00 | 9.43  |
| 20c0007 | -2.00 | 12.14 | um03121 | -0.09 | 9.41  |
| 20c0008 | -1.06 | 14.58 | um03122 | -0.40 | 9.65  |
| 20c0008 | -1.63 | 12.70 | um03124 | 0.63  | 10.24 |
| 20d0000 | -0.29 | 12.20 | um03126 | 0.67  | 12.58 |
| 20d0000 | 0.10  | 10.44 | um03127 | 0.33  | 11.72 |
| 20d0000 | -0.02 | 15.93 | um03128 | 0.17  | 10.54 |
| 20d0000 | 0.17  | 10.26 | um03129 | 0.85  | 10.62 |
| 20d0000 | -0.17 | 12.70 | um03132 | -0.23 | 11.92 |
| 20d0000 | 0.15  | 11.58 | um03134 | -0.03 | 11.53 |
| 20d0000 | -0.24 | 12.43 | um03135 | 3.30  | 11.11 |
| 20d0000 | -1.20 | 12.36 | um03136 | 0.35  | 10.93 |
| 20d0000 | 0.14  | 15.29 | um03138 | -0.06 | 9.80  |
| 20d0001 | -1.01 | 10.04 | um03139 | 1.89  | 11.90 |
| 20d0001 | 0.21  | 12.59 | um03140 | 0.56  | 11.71 |
| 20d0001 | 0.56  | 11.67 | um03141 | 0.36  | 10.80 |
| 20d0001 | -0.41 | 14.98 | um03143 | 0.21  | 11.89 |
| 20d0001 | -0.16 | 8.70  | um03144 | 0.70  | 12.29 |
| 20d0001 | 0.14  | 8.80  | um03145 | -0.12 | 11.63 |
| 20d0001 | -0.84 | 11.72 | um03146 | -0.09 | 10.86 |
| 20d0001 | 0.03  | 11.49 | um03147 | 0.00  | 11.05 |
| 20d0001 | -0.06 | 14.47 | um03148 | -0.27 | 8.72  |
| 20d0001 | 0.00  | 8.58  | um03149 | -1.19 | 9.44  |
| 20d0002 | 0.52  | 12.74 | um03150 | -0.23 | 11.96 |
| 20d0002 | 0.25  | 12.55 | um03152 | -1.02 | 12.07 |
| 20d0002 | 0.31  | 15.12 | um03153 | -0.29 | 12.52 |
| 20d0002 | 0.65  | 11.96 | um03154 | -0.28 | 8.92  |
| 20d0002 | -0.22 | 9.31  | um03156 | -0.37 | 13.33 |
| 20d0002 | 0.46  | 11.47 | um03158 | 2.36  | 12.04 |
| 20d0002 | -0.46 | 12.00 | um03162 | -0.26 | 12.91 |
| 20d0002 | 0.36  | 10.99 | um03164 | 0.54  | 11.73 |
| 20d0002 | -0.03 | 12.54 | um03165 | 0.64  | 12.48 |
| 20d0002 | 0.28  | 10.95 | um03166 | 0.71  | 12.04 |
| 20d0003 | 0.77  | 13.54 | um03167 | 0.27  | 12.51 |
| 20d0003 | 0.69  | 10.56 | um03168 | 1.07  | 12.10 |
| 20d0003 | -0.61 | 11.71 | um03169 | 3.28  | 12.69 |
| 20d0003 | -1.16 | 12.19 | um03170 | -0.14 | 10.93 |
| 20d0003 | 0.38  | 10.12 | um03171 | 0.02  | 13.60 |
| 20d0003 | -0.16 | 15.32 | um03172 | -0.27 | 9.68  |
| 20d0003 | -0.31 | 13.91 | um03175 | -0.10 | 11.52 |
| 20d0003 | 0.37  | 12.97 | um03177 | 3.39  | 13.38 |
| 20d0003 | -1.06 | 13.81 | um03178 | 0.11  | 11.32 |
| 20d0003 | -0.05 | 15.15 | um03180 | 0.51  | 12.75 |
| 20d0004 | -0.13 | 10.47 | um03182 | -0.38 | 14.16 |
| 20d0004 | -0.44 | 14.12 | um03184 | 0.51  | 12.06 |
| 20d0004 | 0.21  | 14.08 | um03192 | -0.04 | 13.37 |
| 20d0004 | -0.92 | 11.50 | um03194 | -0.22 | 12.19 |

|         |       |       |         |       |       |
|---------|-------|-------|---------|-------|-------|
| 20d0004 | -0.31 | 12.50 | um03196 | 0.21  | 9.57  |
| 20d0004 | 0.04  | 12.55 | um03199 | -1.00 | 14.41 |
| 20d0004 | 0.50  | 11.99 | um03200 | -0.52 | 10.99 |
| 20d0004 | 0.26  | 11.94 | um03201 | -0.16 | 8.71  |
| 20d0004 | -0.09 | 13.79 | um03202 | -0.17 | 8.50  |
| 20d0004 | 0.33  | 13.53 | um03204 | -0.84 | 12.30 |
| 20d0005 | -0.16 | 11.75 | um03206 | -0.38 | 11.30 |
| 20d0005 | -0.83 | 11.95 | um03207 | 0.12  | 12.37 |
| 20d0005 | 0.02  | 10.17 | um03209 | -0.49 | 13.38 |
| 20d0005 | -0.10 | 14.52 | um03210 | -0.74 | 13.86 |
| 20d0005 | -0.01 | 12.02 | um03211 | 0.85  | 11.21 |
| 20d0005 | 0.27  | 12.18 | um03216 | -0.14 | 12.37 |
| 20d0005 | -0.17 | 13.49 | um03218 | -0.01 | 13.21 |
| 20d0005 | -0.21 | 12.86 | um03220 | 0.83  | 13.53 |
| 20d0005 | 0.16  | 11.68 | um03221 | -0.91 | 12.13 |
| 20d0005 | -0.73 | 13.92 | um03223 | -0.48 | 8.71  |
| 20d0006 | -0.08 | 11.36 | um03226 | -0.08 | 10.95 |
| 20d0006 | 0.06  | 11.74 | um03227 | -0.07 | 12.99 |
| 20d0006 | 0.35  | 12.11 | um03228 | 1.55  | 11.14 |
| 20d0006 | 0.10  | 8.66  | um03229 | 1.05  | 12.96 |
| 20d0006 | 0.03  | 9.04  | um03231 | 0.01  | 9.67  |
| 20d0006 | -0.45 | 14.52 | um03232 | 0.57  | 11.23 |
| 20d0006 | 0.02  | 9.79  | um03233 | 0.18  | 12.69 |
| 20d0006 | 0.97  | 11.28 | um03234 | -0.55 | 11.08 |
| 20d0006 | -0.42 | 11.68 | um03235 | -0.06 | 11.54 |
| 20d0006 | 1.08  | 10.89 | um03237 | 0.06  | 15.28 |
| 20d0007 | 0.12  | 12.45 | um03238 | -0.26 | 11.00 |
| 20d0007 | 0.15  | 11.36 | um03239 | -0.13 | 12.88 |
| 20d0007 | -0.05 | 9.32  | um03240 | 0.16  | 12.57 |
| 20d0007 | 0.58  | 14.43 | um03241 | -0.34 | 10.80 |
| 20d0007 | 0.29  | 12.14 | um03242 | 0.31  | 10.47 |
| 20d0007 | 0.11  | 8.84  | um03244 | -0.06 | 10.05 |
| 20d0007 | 0.63  | 11.12 | um03246 | 1.06  | 14.31 |
| 20d0007 | 0.16  | 10.43 | um03249 | 0.51  | 10.73 |
| 20d0007 | -0.02 | 9.01  | um03250 | -0.03 | 12.51 |
| 20d0007 | -0.95 | 12.85 | um03251 | 0.24  | 10.49 |
| 20d0008 | 0.40  | 10.22 | um03252 | -0.20 | 13.17 |
| 20d0008 | 0.14  | 11.17 | um03253 | 0.61  | 10.91 |
| 20d0008 | -0.39 | 12.48 | um03254 | 0.34  | 12.12 |
| 20d0008 | 0.28  | 11.40 | um03256 | 0.69  | 12.09 |
| 20d0008 | -1.84 | 10.81 | um03260 | 0.23  | 11.88 |
| 20d0008 | -1.46 | 13.24 | um03261 | -0.17 | 11.11 |
| 21c0000 | -0.77 | 12.49 | um03262 | -0.65 | 10.27 |
| 21c0000 | -0.30 | 9.09  | um03263 | 0.27  | 11.69 |
| 21c0000 | -0.17 | 8.99  | um03264 | -0.19 | 11.93 |
| 21c0000 | -0.45 | 12.20 | um03265 | -0.08 | 14.05 |
| 21c0000 | -0.63 | 13.55 | um03266 | -0.40 | 11.21 |
| 21c0000 | -0.30 | 15.82 | um03267 | 0.19  | 12.16 |
| 21d0000 | -0.03 | 10.08 | um03268 | 0.32  | 10.62 |
| 21d0000 | -0.02 | 8.61  | um03271 | 0.10  | 10.76 |
| 21d0000 | -0.74 | 14.95 | um03273 | -0.09 | 11.51 |
| 21d0000 | -0.17 | 12.40 | um03274 | -0.22 | 8.91  |
| 22c0000 | 0.10  | 8.49  | um03276 | 0.36  | 11.33 |
| 22c0000 | 0.04  | 11.14 | um03277 | 0.09  | 11.50 |

|         |       |       |         |       |       |
|---------|-------|-------|---------|-------|-------|
| 22c0000 | 0.12  | 11.61 | um03278 | 0.62  | 12.51 |
| 22c0000 | -0.09 | 11.06 | um03280 | 0.08  | 12.70 |
| 22c0000 | 0.03  | 11.03 | um03281 | -1.03 | 10.83 |
| 22c0000 | 0.54  | 13.72 | um03282 | -0.57 | 11.89 |
| 22c0000 | 0.28  | 10.70 | um03283 | -0.40 | 12.86 |
| 22c0000 | 0.13  | 11.86 | um03284 | -0.80 | 15.29 |
| 22c0000 | -0.54 | 11.55 | um03285 | 0.12  | 11.16 |
| 22c0001 | 0.15  | 12.67 | um03286 | -0.56 | 11.70 |
| 22c0001 | -0.05 | 9.19  | um03288 | -0.25 | 12.21 |
| 22c0001 | 0.73  | 11.33 | um03289 | 0.98  | 12.34 |
| 22c0001 | 0.70  | 13.11 | um03290 | -0.88 | 11.35 |
| 22c0001 | 0.33  | 12.93 | um03292 | 0.59  | 11.59 |
| 22c0001 | -0.68 | 13.41 | um03293 | 0.23  | 12.68 |
| 22c0001 | 0.73  | 11.49 | um03294 | -0.32 | 11.28 |
| 22c0001 | 0.02  | 9.02  | um03296 | 1.04  | 10.72 |
| 22c0001 | -0.68 | 12.50 | um03297 | 0.32  | 9.06  |
| 22c0001 | 0.02  | 10.29 | um03298 | 0.48  | 13.91 |
| 22c0002 | 0.50  | 13.30 | um03299 | -0.83 | 14.61 |
| 22c0002 | -0.03 | 9.06  | um03301 | -0.36 | 11.82 |
| 22c0002 | 0.09  | 11.46 | um03303 | 0.38  | 10.97 |
| 22c0002 | 0.35  | 11.64 | um03304 | -0.61 | 15.02 |
| 22c0002 | -2.71 | 10.96 | um03305 | 0.31  | 12.99 |
| 22c0002 | -0.09 | 13.25 | um03306 | 0.05  | 12.01 |
| 22c0002 | 0.50  | 13.56 | um03307 | -0.10 | 10.95 |
| 22c0002 | -0.27 | 13.00 | um03308 | -0.53 | 13.25 |
| 22c0002 | 0.19  | 12.52 | um03309 | 0.24  | 13.00 |
| 22c0002 | -0.12 | 10.84 | um03310 | 2.46  | 11.85 |
| 22c0003 | 0.28  | 12.26 | um03312 | 0.12  | 11.91 |
| 22c0003 | -0.13 | 10.02 | um03313 | 0.35  | 8.94  |
| 22c0003 | 0.10  | 12.31 | um03314 | 0.03  | 9.19  |
| 22c0003 | -0.60 | 10.72 | um03315 | -0.69 | 12.59 |
| 22c0003 | 0.52  | 10.49 | um03317 | 0.33  | 9.83  |
| 22c0003 | -1.01 | 13.44 | um03318 | -0.21 | 12.28 |
| 22c0003 | 0.03  | 12.15 | um03323 | -0.24 | 11.70 |
| 22c0003 | 0.09  | 13.34 | um03325 | -1.65 | 12.39 |
| 22c0003 | 0.30  | 11.97 | um03327 | -0.52 | 9.91  |
| 22c0003 | 0.24  | 12.23 | um03330 | 0.30  | 12.60 |
| 22c0004 | 0.03  | 11.70 | um03331 | -0.23 | 11.40 |
| 22c0004 | 0.38  | 9.86  | um03332 | 0.35  | 10.73 |
| 22c0004 | 0.16  | 12.43 | um03333 | -0.39 | 11.89 |
| 22c0004 | -0.48 | 12.32 | um03336 | -0.40 | 12.69 |
| 22c0004 | 0.08  | 11.83 | um03337 | -0.15 | 12.44 |
| 22c0004 | 0.06  | 8.74  | um03340 | 0.36  | 12.97 |
| 22c0004 | -0.07 | 10.42 | um03341 | -0.49 | 11.60 |
| 22c0004 | -0.01 | 10.72 | um03343 | 0.55  | 11.08 |
| 22c0004 | 0.12  | 10.51 | um03344 | 0.13  | 12.48 |
| 22c0004 | -0.15 | 8.73  | um03346 | 0.13  | 11.23 |
| 22c0005 | 0.00  | 8.84  | um03347 | -0.80 | 12.67 |
| 22c0005 | 0.22  | 11.97 | um03348 | -0.04 | 12.95 |
| 22c0005 | 0.07  | 12.52 | um03349 | -0.65 | 15.61 |
| 22c0005 | 0.26  | 13.16 | um03351 | 0.80  | 12.53 |
| 22c0005 | -0.33 | 11.32 | um03352 | -0.37 | 12.42 |
| 22c0005 | 0.00  | 12.51 | um03353 | 0.19  | 11.04 |
| 22c0005 | 0.17  | 12.83 | um03354 | 0.58  | 12.98 |

|         |       |       |         |       |       |
|---------|-------|-------|---------|-------|-------|
| 22c0005 | 0.25  | 13.26 | um03355 | -0.02 | 12.58 |
| 22c0005 | -0.24 | 12.82 | um03356 | -1.06 | 15.53 |
| 22c0005 | -0.03 | 10.68 | um03358 | -0.39 | 11.58 |
| 22c0006 | 0.04  | 11.28 | um03361 | -0.03 | 12.72 |
| 22c0006 | -0.36 | 10.60 | um03362 | 0.50  | 12.32 |
| 22c0006 | 0.03  | 10.93 | um03363 | -0.10 | 10.00 |
| 22c0006 | 0.34  | 11.42 | um03365 | 0.48  | 12.99 |
| 22c0006 | -0.41 | 11.37 | um03366 | 0.09  | 10.64 |
| 22c0006 | -0.34 | 12.12 | um03368 | 0.21  | 11.29 |
| 22c0006 | 0.37  | 10.44 | um03371 | 0.47  | 11.39 |
| 22c0006 | 0.54  | 13.61 | um03372 | 1.77  | 12.13 |
| 22c0006 | 0.01  | 12.02 | um03373 | 0.62  | 12.11 |
| 22c0006 | -0.48 | 11.52 | um03375 | -0.54 | 10.10 |
| 22c0007 | -0.14 | 11.63 | um03376 | -0.65 | 10.41 |
| 22c0007 | 0.00  | 9.99  | um03377 | -0.49 | 11.80 |
| 22c0007 | -0.07 | 12.76 | um03379 | 0.62  | 10.31 |
| 22c0007 | -0.53 | 12.86 | um03381 | -4.29 | 12.52 |
| 22c0007 | -0.18 | 11.74 | um03382 | -0.85 | 10.03 |
| 22c0007 | -0.40 | 11.32 | um03383 | -0.01 | 12.56 |
| 22c0007 | 0.51  | 11.84 | um03384 | 0.99  | 11.17 |
| 22c0007 | 0.70  | 11.84 | um03386 | -0.40 | 9.66  |
| 22c0007 | -0.03 | 9.06  | um03387 | -0.15 | 8.53  |
| 22c0007 | -0.98 | 12.71 | um03388 | -0.26 | 9.41  |
| 22c0008 | -0.66 | 13.23 | um03389 | -0.10 | 8.75  |
| 22c0008 | -0.04 | 9.13  | um03392 | -0.77 | 9.30  |
| 22c0008 | -0.16 | 10.14 | um03393 | -0.15 | 8.52  |
| 22c0008 | -0.25 | 11.32 | um03394 | 0.76  | 11.12 |
| 22c0008 | 0.25  | 11.61 | um03395 | 0.41  | 9.53  |
| 22c0008 | 0.42  | 10.43 | um03396 | 0.75  | 10.65 |
| 22c0008 | 0.13  | 10.06 | um03397 | 2.26  | 11.15 |
| 22c0008 | 0.29  | 13.40 | um03398 | 2.49  | 14.28 |
| 22c0008 | 1.51  | 14.52 | um03400 | 1.72  | 12.28 |
| 22c0008 | 0.01  | 9.63  | um03402 | 3.66  | 13.25 |
| 22c0009 | -0.29 | 12.48 | um03403 | 0.36  | 11.30 |
| 22c0009 | -0.47 | 11.87 | um03404 | 0.52  | 9.03  |
| 22c0009 | 0.00  | 8.89  | um03406 | 0.23  | 9.04  |
| 22c0009 | -0.04 | 8.82  | um03407 | 0.08  | 8.87  |
| 22c0009 | 0.08  | 11.65 | um03408 | 1.10  | 10.56 |
| 22c0009 | 0.29  | 12.49 | um03409 | 0.15  | 8.91  |
| 22c0009 | -0.26 | 10.69 | um03411 | 0.08  | 9.91  |
| 22c0009 | -0.24 | 11.93 | um03412 | -0.65 | 13.14 |
| 22c0009 | 0.23  | 15.68 | um03413 | 0.41  | 11.06 |
| 22c0009 | -0.12 | 9.69  | um03414 | -0.56 | 9.44  |
| 22c0010 | -0.10 | 13.03 | um03415 | 2.01  | 10.75 |
| 22c0010 | -0.20 | 11.81 | um03416 | 0.63  | 10.95 |
| 22c0010 | -0.23 | 15.23 | um03417 | -1.13 | 11.28 |
| 22c0010 | -0.22 | 11.65 | um03418 | -0.77 | 12.96 |
| 22c0010 | 0.09  | 9.38  | um03419 | -0.18 | 11.37 |
| 22c0010 | -0.29 | 11.63 | um03421 | -0.11 | 11.50 |
| 22c0010 | 0.28  | 14.29 | um03422 | 0.19  | 11.85 |
| 22c0010 | -0.17 | 9.17  | um03424 | -0.34 | 12.70 |
| 22c0010 | 0.06  | 9.07  | um03425 | -0.38 | 12.25 |
| 22c0010 | 0.01  | 13.37 | um03431 | 0.02  | 12.59 |
| 22c0011 | 0.17  | 12.60 | um03433 | -0.04 | 12.09 |

|         |       |       |         |       |       |
|---------|-------|-------|---------|-------|-------|
| 22c0011 | -0.66 | 11.91 | um03434 | 0.13  | 11.02 |
| 22c0011 | 0.32  | 11.57 | um03435 | -0.03 | 10.98 |
| 22c0011 | -0.36 | 10.18 | um03436 | 0.73  | 13.77 |
| 22c0011 | 0.14  | 12.35 | um03437 | 0.27  | 11.54 |
| 22c0011 | -0.11 | 13.01 | um03439 | -0.20 | 8.74  |
| 22c0011 | 0.07  | 14.04 | um03440 | -0.92 | 9.45  |
| 22c0011 | 0.11  | 14.08 | um03442 | 0.11  | 11.74 |
| 22c0011 | 0.35  | 12.87 | um03443 | -0.39 | 13.48 |
| 22c0011 | -0.14 | 11.14 | um03445 | -0.34 | 15.67 |
| 22c0012 | 0.00  | 8.72  | um03446 | -0.46 | 11.82 |
| 22c0012 | -1.08 | 12.72 | um03448 | 0.30  | 11.79 |
| 22c0012 | -1.03 | 12.42 | um03449 | -0.07 | 14.66 |
| 22c0012 | -0.16 | 9.83  | um03450 | -0.02 | 11.96 |
| 22c0012 | 0.05  | 12.52 | um03451 | 2.21  | 13.54 |
| 22c0012 | 0.08  | 10.98 | um03454 | 0.01  | 11.62 |
| 22c0012 | -0.34 | 13.14 | um03456 | -0.24 | 13.31 |
| 22c0012 | -0.04 | 8.65  | um03458 | -0.56 | 11.84 |
| 22c0012 | 0.19  | 13.14 | um03459 | -0.17 | 11.74 |
| 22c0012 | -0.40 | 11.74 | um03460 | 0.38  | 12.57 |
| 22c0013 | 0.32  | 12.74 | um03461 | 0.33  | 11.73 |
| 22c0013 | -0.02 | 12.12 | um03462 | -0.41 | 8.71  |
| 22c0013 | -0.44 | 10.96 | um03463 | 0.03  | 12.11 |
| 22c0013 | 0.02  | 11.91 | um03464 | 0.25  | 11.21 |
| 22c0013 | 0.37  | 12.85 | um03465 | -0.39 | 12.03 |
| 22c0013 | 0.00  | 8.63  | um03466 | 0.46  | 11.52 |
| 22c0013 | 0.01  | 8.51  | um03467 | 0.24  | 12.36 |
| 22c0013 | 0.48  | 11.39 | um03468 | -0.90 | 13.24 |
| 22c0013 | -0.30 | 10.53 | um03469 | -0.33 | 12.20 |
| 22c0013 | 0.56  | 11.18 | um03470 | -1.53 | 12.39 |
| 22c0014 | 0.19  | 9.39  | um03471 | 0.08  | 11.38 |
| 22c0014 | -0.14 | 8.95  | um03472 | -0.34 | 10.11 |
| 22c0014 | -0.09 | 13.08 | um03473 | -0.47 | 11.43 |
| 22c0014 | -0.26 | 11.48 | um03474 | 1.42  | 11.46 |
| 22c0014 | 0.07  | 10.74 | um03475 | -4.01 | 10.91 |
| 22c0014 | -0.10 | 8.83  | um03476 | -0.34 | 11.87 |
| 22c0014 | 0.14  | 8.57  | um03477 | -0.19 | 12.51 |
| 22c0014 | -0.01 | 8.63  | um03478 | 0.29  | 11.98 |
| 22c0014 | -0.08 | 8.85  | um03480 | 0.63  | 12.54 |
| 22c0014 | 0.63  | 11.99 | um03481 | 0.13  | 11.29 |
| 22c0015 | 0.04  | 11.04 | um03483 | -0.18 | 8.80  |
| 22c0015 | -0.40 | 9.52  | um03485 | 2.82  | 12.21 |
| 22c0015 | -0.44 | 12.79 | um03486 | 0.76  | 12.13 |
| 22c0015 | -0.84 | 14.29 | um03487 | 0.62  | 11.64 |
| 22c0015 | -0.18 | 9.87  | um03491 | 0.07  | 12.31 |
| 22c0015 | -0.17 | 11.18 | um03493 | 0.29  | 12.00 |
| 22c0015 | -0.05 | 9.59  | um03494 | 0.12  | 13.48 |
| 22c0015 | -0.27 | 9.85  | um03495 | -0.33 | 11.69 |
| 22c0015 | -0.17 | 13.24 | um03496 | -0.56 | 10.45 |
| 22c0015 | -0.30 | 11.89 | um03497 | -0.65 | 10.21 |
| 22c0016 | 0.04  | 11.05 | um03498 | -0.24 | 11.86 |
| 22c0016 | -0.18 | 10.70 | um03501 | -0.65 | 11.28 |
| 22c0016 | 0.18  | 9.49  | um03504 | -0.55 | 11.80 |
| 22c0016 | -0.04 | 11.04 | um03505 | -0.04 | 10.64 |
| 22c0016 | -0.57 | 13.90 | um03506 | 1.94  | 12.37 |

|         |       |       |         |       |       |
|---------|-------|-------|---------|-------|-------|
| 22c0016 | -0.20 | 12.04 | um03507 | 1.93  | 12.22 |
| 22c0016 | 0.79  | 12.42 | um03508 | 1.55  | 11.60 |
| 22c0016 | -0.36 | 11.64 | um03511 | 0.05  | 14.60 |
| 22c0016 | -0.13 | 11.35 | um03513 | -0.67 | 13.14 |
| 22c0016 | -0.17 | 11.55 | um03514 | -0.18 | 10.89 |
| 22c0017 | -0.35 | 14.95 | um03515 | -0.10 | 12.29 |
| 22c0017 | 0.33  | 14.31 | um03517 | -0.06 | 12.32 |
| 22c0017 | 0.05  | 12.80 | um03518 | -0.15 | 12.06 |
| 22c0017 | -0.56 | 12.72 | um03520 | -0.19 | 10.40 |
| 22c0017 | 0.17  | 10.64 | um03521 | 0.81  | 11.02 |
| 22c0017 | -0.12 | 12.66 | um03522 | -1.47 | 13.42 |
| 22c0017 | 0.31  | 11.81 | um03523 | -2.11 | 11.43 |
| 22c0017 | -0.15 | 11.20 | um03524 | -0.76 | 10.38 |
| 22c0017 | -0.25 | 11.77 | um03525 | 0.28  | 11.45 |
| 22c0017 | 0.32  | 9.88  | um03528 | -0.06 | 11.74 |
| 22c0018 | -0.07 | 10.15 | um03529 | -0.37 | 11.63 |
| 22c0018 | 0.06  | 9.31  | um03530 | 0.40  | 12.19 |
| 22c0018 | -0.06 | 8.87  | um03532 | 0.02  | 11.25 |
| 22c0018 | 0.53  | 12.29 | um03533 | -0.08 | 14.68 |
| 22c0018 | -0.33 | 11.92 | um03534 | 0.19  | 11.39 |
| 22c0018 | -0.14 | 11.37 | um03535 | 0.03  | 8.87  |
| 22c0018 | 0.38  | 10.12 | um03536 | -0.14 | 11.57 |
| 22c0018 | -0.12 | 11.16 | um03537 | -0.41 | 13.02 |
| 22c0018 | -0.10 | 12.35 | um03538 | -0.24 | 12.28 |
| 22c0018 | 0.06  | 8.88  | um03539 | -0.42 | 14.47 |
| 22c0019 | 0.09  | 9.36  | um03540 | 0.03  | 12.00 |
| 22c0019 | 0.44  | 12.04 | um03541 | 0.06  | 8.90  |
| 22c0019 | -0.60 | 12.30 | um03542 | -0.13 | 10.19 |
| 22c0019 | 0.33  | 13.55 | um03543 | 0.71  | 10.96 |
| 22c0019 | -0.49 | 10.98 | um03544 | 0.09  | 11.36 |
| 22c0019 | 0.20  | 10.90 | um03546 | -0.16 | 8.63  |
| 22c0019 | 0.70  | 13.31 | um03547 | 0.55  | 10.04 |
| 22c0019 | -0.18 | 12.73 | um03548 | 1.41  | 12.01 |
| 22c0019 | 0.06  | 13.20 | um03549 | 0.09  | 11.09 |
| 22c0019 | 0.21  | 12.50 | um03550 | 0.29  | 11.91 |
| 22c0020 | -0.33 | 15.72 | um03551 | -0.41 | 9.87  |
| 22c0020 | -0.26 | 11.96 | um03552 | -0.46 | 12.16 |
| 22c0020 | 0.01  | 9.93  | um03553 | 0.19  | 10.02 |
| 22c0020 | 0.57  | 13.05 | um03554 | -0.07 | 10.96 |
| 22c0020 | 0.37  | 11.91 | um03555 | -0.09 | 11.04 |
| 22c0020 | -0.10 | 11.27 | um03556 | 2.46  | 12.25 |
| 22c0020 | -0.10 | 10.50 | um03557 | 0.51  | 11.15 |
| 22c0020 | -0.07 | 10.37 | um03558 | -3.70 | 11.23 |
| 22c0020 | -2.64 | 13.28 | um03559 | -2.35 | 9.68  |
| 22c0020 | -0.29 | 12.21 | um03560 | -3.60 | 10.28 |
| 22c0021 | 0.05  | 9.13  | um03561 | -1.81 | 9.17  |
| 22c0021 | -0.15 | 13.48 | um03562 | -0.18 | 8.61  |
| 22c0021 | -0.59 | 12.75 | um03563 | -2.05 | 9.60  |
| 22c0021 | -0.25 | 8.59  | um03564 | -0.86 | 8.92  |
| 22c0021 | -0.94 | 12.33 | um03565 | 0.36  | 11.43 |
| 22c0021 | -0.54 | 10.44 | um03567 | 0.15  | 10.75 |
| 22c0021 | 0.00  | 12.22 | um03568 | 1.75  | 11.13 |
| 22c0021 | -0.08 | 11.29 | um03569 | -0.08 | 9.64  |
| 22c0021 | 0.26  | 11.81 | um03570 | 0.39  | 11.55 |



|         |       |       |         |       |       |
|---------|-------|-------|---------|-------|-------|
| 22c0021 | 0.08  | 8.71  | um03571 | -0.38 | 14.44 |
| 22c0022 | -0.24 | 9.93  | um03572 | 0.05  | 10.07 |
| 22c0022 | -0.02 | 11.97 | um03573 | 0.54  | 10.74 |
| 22c0022 | 0.56  | 12.63 | um03574 | -0.35 | 12.90 |
| 22c0022 | 0.01  | 13.87 | um03575 | -0.14 | 11.29 |
| 22c0022 | -0.29 | 9.29  | um03576 | -1.91 | 11.54 |
| 22c0022 | -0.43 | 9.82  | um03580 | 0.03  | 11.94 |
| 22c0022 | 0.72  | 13.05 | um03583 | 0.42  | 11.70 |
| 22c0022 | -0.10 | 9.04  | um03584 | 0.27  | 11.55 |
| 22c0022 | -0.41 | 10.99 | um03585 | -3.59 | 12.94 |
| 22c0022 | -0.15 | 10.94 | um03586 | 0.26  | 8.98  |
| 22c0023 | 0.08  | 9.18  | um03588 | 0.22  | 12.37 |
| 22c0023 | -0.41 | 11.43 | um03590 | 0.36  | 11.86 |
| 22c0023 | -0.36 | 9.65  | um03593 | 0.00  | 12.94 |
| 22c0023 | -0.09 | 11.26 | um03595 | 0.02  | 12.56 |
| 22c0023 | -0.47 | 13.84 | um03596 | 0.30  | 12.00 |
| 22c0023 | 0.03  | 11.40 | um03597 | -0.52 | 12.79 |
| 22c0023 | 0.10  | 10.66 | um03598 | 0.17  | 12.59 |
| 22c0023 | 0.37  | 13.58 | um03599 | -0.22 | 14.75 |
| 22c0023 | -1.15 | 12.96 | um03601 | 0.74  | 12.60 |
| 22c0023 | -0.14 | 12.46 | um03602 | -0.39 | 12.93 |
| 22c0024 | -0.21 | 13.15 | um03603 | -0.31 | 10.90 |
| 22c0024 | -0.20 | 12.11 | um03604 | -0.16 | 8.51  |
| 22c0024 | -0.50 | 11.88 | um03605 | -0.96 | 9.69  |
| 22c0024 | -0.72 | 13.95 | um03607 | -0.38 | 11.39 |
| 22c0024 | 0.63  | 14.13 | um03608 | 0.09  | 11.53 |
| 22c0024 | 0.47  | 11.21 | um03609 | 0.11  | 11.37 |
| 22c0024 | -0.14 | 8.63  | um03610 | -0.50 | 11.71 |
| 22c0024 | -0.08 | 8.74  | um03611 | -0.50 | 11.61 |
| 22c0024 | 0.55  | 12.03 | um03612 | 0.11  | 8.91  |
| 22c0024 | 0.51  | 12.51 | um03613 | -0.41 | 11.67 |
| 22c0025 | -0.46 | 10.28 | um03614 | -2.59 | 11.37 |
| 22c0025 | -0.04 | 11.36 | um03615 | -2.05 | 13.65 |
| 22c0025 | 0.78  | 13.15 | um03616 | -0.55 | 11.77 |
| 22c0025 | -0.13 | 10.43 | um03617 | -0.30 | 10.97 |
| 22c0025 | 0.48  | 11.53 | um03618 | -0.08 | 11.05 |
| 22c0025 | 0.52  | 11.96 | um03619 | -0.52 | 8.84  |
| 22c0025 | -0.14 | 10.89 | um03620 | 1.57  | 12.31 |
| 22c0025 | 0.28  | 10.68 | um03621 | 0.01  | 11.14 |
| 22c0025 | -0.56 | 14.35 | um03622 | -0.67 | 13.44 |
| 22c0025 | -0.07 | 12.72 | um03623 | 0.81  | 11.75 |
| 22c0026 | 1.50  | 15.08 | um03624 | -0.25 | 11.50 |
| 22c0026 | 0.25  | 12.73 | um03626 | 0.07  | 11.01 |
| 22c0026 | -0.04 | 11.13 | um03627 | -0.09 | 12.16 |
| 22c0026 | -0.73 | 12.33 | um03628 | 0.32  | 12.19 |
| 22c0026 | -0.05 | 8.79  | um03629 | 0.05  | 12.80 |
| 22c0026 | 0.46  | 12.44 | um03630 | 0.61  | 10.18 |
| 22c0026 | -0.24 | 12.36 | um03631 | -0.41 | 11.66 |
| 22c0026 | -0.10 | 12.29 | um03632 | -0.35 | 12.41 |
| 22c0026 | -0.11 | 12.47 | um03635 | 0.02  | 11.16 |
| 22c0026 | 0.14  | 12.36 | um03636 | -0.18 | 9.57  |
| 22c0027 | -0.03 | 8.95  | um03638 | 0.48  | 11.59 |
| 22c0027 | 0.35  | 13.11 | um03640 | 0.33  | 13.14 |
| 22c0027 | 0.44  | 11.44 | um03641 | 0.12  | 10.97 |

|         |       |       |         |       |       |
|---------|-------|-------|---------|-------|-------|
| 22c0027 | -0.05 | 13.77 | um03642 | -0.51 | 9.20  |
| 22c0027 | 0.14  | 9.50  | um03643 | -0.11 | 8.80  |
| 22c0027 | -0.04 | 11.94 | um03644 | -0.27 | 8.47  |
| 22c0027 | 0.14  | 12.02 | um03645 | -0.50 | 8.85  |
| 22c0027 | -0.19 | 12.04 | um03647 | 0.08  | 13.22 |
| 22c0027 | -0.76 | 11.15 | um03648 | -0.36 | 11.38 |
| 22c0027 | 0.04  | 8.66  | um03649 | 0.99  | 11.37 |
| 22c0028 | -0.42 | 12.52 | um03650 | -0.18 | 8.85  |
| 22c0028 | -0.35 | 10.36 | um03652 | 0.01  | 12.44 |
| 22c0028 | -0.49 | 12.05 | um03653 | 0.25  | 12.05 |
| 22c0028 | 0.10  | 10.47 | um03654 | 0.18  | 12.88 |
| 22c0028 | 0.04  | 8.75  | um03655 | -0.03 | 14.37 |
| 22c0028 | -0.20 | 12.41 | um03656 | 0.16  | 11.04 |
| 22c0028 | -0.64 | 10.00 | um03657 | -0.36 | 11.85 |
| 22c0028 | 0.58  | 13.83 | um03658 | -1.18 | 11.84 |
| 22c0028 | 0.47  | 13.73 | um03659 | 1.00  | 13.20 |
| 22c0028 | 0.80  | 11.63 | um03661 | 0.52  | 12.04 |
| 22c0029 | -0.50 | 12.64 | um03662 | -0.29 | 12.87 |
| 22c0029 | 0.23  | 12.01 | um03663 | -1.53 | 12.70 |
| 22c0029 | -0.59 | 11.40 | um03664 | 2.55  | 12.36 |
| 22c0029 | -0.61 | 14.14 | um03665 | 3.17  | 12.24 |
| 22c0029 | -0.25 | 12.63 | um03669 | -0.37 | 12.37 |
| 22c0029 | -0.13 | 12.96 | um03673 | -0.39 | 8.98  |
| 22c0029 | -0.19 | 12.63 | um03674 | 0.75  | 12.34 |
| 22c0029 | 0.05  | 12.51 | um03676 | -0.37 | 9.98  |
| 22c0029 | -0.05 | 10.30 | um03677 | -0.42 | 8.61  |
| 22c0029 | 0.12  | 13.18 | um03678 | 1.43  | 13.93 |
| 22c0030 | -2.37 | 12.10 | um03680 | 0.51  | 12.43 |
| 22c0030 | -0.07 | 8.97  | um03681 | 0.05  | 10.98 |
| 22c0030 | -0.04 | 14.59 | um03682 | 0.56  | 12.04 |
| 22c0030 | -0.18 | 9.16  | um03685 | -0.15 | 12.02 |
| 22c0030 | -0.62 | 12.15 | um03687 | -0.48 | 12.06 |
| 22c0030 | 0.42  | 12.15 | um03688 | -2.28 | 10.81 |
| 22c0030 | 0.49  | 11.56 | um03689 | -1.81 | 11.13 |
| 22c0030 | 1.03  | 11.61 | um03690 | -2.03 | 11.36 |
| 22c0030 | 1.41  | 13.20 | um03691 | -1.74 | 11.52 |
| 22c0030 | -1.18 | 12.96 | um03692 | -0.44 | 10.13 |
| 22c0031 | -0.52 | 12.13 | um03694 | -1.69 | 11.89 |
| 22c0031 | -0.22 | 12.31 | um03695 | 0.15  | 10.86 |
| 22c0031 | -0.03 | 10.37 | um03696 | 0.33  | 11.75 |
| 22c0031 | -0.73 | 11.66 | um03698 | -0.17 | 11.45 |
| 22c0031 | 0.02  | 11.94 | um03699 | -0.02 | 13.58 |
| 22c0031 | -0.60 | 11.03 | um03700 | 0.07  | 13.73 |
| 22c0031 | -0.08 | 8.78  | um03701 | -0.13 | 11.99 |
| 22c0031 | -0.37 | 12.82 | um03702 | -0.03 | 10.79 |
| 22c0031 | 0.06  | 10.30 | um03704 | 0.40  | 15.00 |
| 22c0031 | -0.46 | 11.76 | um03706 | 2.14  | 11.09 |
| 22c0032 | -1.20 | 13.52 | um03707 | 0.42  | 12.42 |
| 22c0032 | -0.17 | 8.69  | um03708 | -0.12 | 11.43 |
| 22d0000 | -0.04 | 8.96  | um03713 | 1.33  | 9.73  |
| 22d0000 | 0.11  | 9.15  | um03714 | 0.58  | 13.22 |
| 22d0000 | 0.01  | 12.21 | um03717 | -0.45 | 12.10 |
| 22d0000 | -0.07 | 10.91 | um03718 | 0.19  | 13.45 |
| 22d0000 | -0.26 | 10.67 | um03720 | -0.24 | 11.84 |

|         |       |       |         |       |       |
|---------|-------|-------|---------|-------|-------|
| 22d0000 | 0.52  | 12.32 | um03722 | 0.12  | 11.38 |
| 22d0000 | -0.22 | 9.99  | um03724 | -0.12 | 12.00 |
| 22d0000 | 0.30  | 11.90 | um03726 | -0.65 | 15.78 |
| 22d0000 | -0.06 | 10.23 | um03728 | -0.41 | 12.59 |
| 22d0001 | 0.04  | 8.85  | um03729 | -0.45 | 10.60 |
| 22d0001 | 0.16  | 11.99 | um03730 | 0.08  | 11.02 |
| 22d0001 | 0.35  | 12.24 | um03734 | -1.49 | 14.64 |
| 22d0001 | 0.61  | 11.19 | um03737 | 0.57  | 14.57 |
| 22d0001 | -0.13 | 9.43  | um03738 | -0.04 | 11.85 |
| 22d0001 | -0.09 | 8.53  | um03740 | -0.71 | 10.54 |
| 22d0001 | 1.00  | 10.36 | um03743 | 0.30  | 11.32 |
| 22d0001 | 0.52  | 13.57 | um03744 | -0.26 | 8.83  |
| 22d0001 | -0.32 | 12.71 | um03745 | -0.33 | 8.51  |
| 22d0001 | -0.36 | 14.25 | um03746 | -0.20 | 8.60  |
| 22d0002 | -0.05 | 12.17 | um03747 | -0.11 | 8.57  |
| 22d0002 | 0.13  | 11.18 | um03748 | 0.01  | 8.78  |
| 22d0002 | -0.24 | 11.16 | um03749 | 1.01  | 10.10 |
| 22d0002 | -0.01 | 10.65 | um03750 | 0.59  | 9.49  |
| 22d0002 | 0.68  | 13.76 | um03751 | -0.33 | 8.74  |
| 22d0002 | 0.19  | 10.73 | um03752 | -0.33 | 8.56  |
| 22d0002 | 0.12  | 9.92  | um03753 | 1.16  | 10.57 |
| 22d0002 | 0.53  | 13.47 | um03754 | 1.02  | 10.86 |
| 22d0002 | 0.08  | 12.42 | um03755 | 0.06  | 13.77 |
| 22d0002 | 0.02  | 10.89 | um03756 | -0.52 | 10.16 |
| 22d0003 | -0.05 | 12.91 | um03757 | -0.05 | 8.95  |
| 22d0003 | -0.12 | 12.24 | um03758 | -0.17 | 11.05 |
| 22d0003 | 0.64  | 12.46 | um03759 | 0.43  | 11.31 |
| 22d0003 | 0.88  | 13.51 | um03760 | -0.53 | 12.59 |
| 22d0003 | 0.62  | 14.11 | um03761 | -0.87 | 10.86 |
| 22d0003 | 0.20  | 13.92 | um03762 | -0.04 | 11.42 |
| 22d0003 | -0.23 | 14.32 | um03763 | -0.30 | 13.42 |
| 22d0003 | -0.64 | 11.40 | um03764 | -0.51 | 9.38  |
| 22d0003 | -0.17 | 10.82 | um03765 | -0.24 | 12.40 |
| 22d0003 | -0.03 | 15.52 | um03766 | 0.06  | 10.90 |
| 22d0004 | 0.07  | 12.80 | um03767 | 0.10  | 11.63 |
| 22d0004 | -0.42 | 14.04 | um03770 | 0.46  | 12.40 |
| 22d0004 | -0.29 | 10.75 | um03771 | -0.33 | 12.46 |
| 22d0004 | -0.58 | 10.60 | um03772 | -0.21 | 12.36 |
| 22d0004 | -0.44 | 15.69 | um03774 | -0.07 | 11.24 |
| 22d0004 | -0.09 | 12.96 | um03775 | -0.55 | 13.35 |
| 22d0004 | -0.26 | 11.90 | um03776 | -2.61 | 10.31 |
| 22d0004 | 0.30  | 13.84 | um03777 | -0.18 | 11.32 |
| 22d0004 | -0.29 | 12.29 | um03778 | -0.05 | 11.19 |
| 22d0004 | 0.10  | 14.14 | um03779 | -0.48 | 10.92 |
| 22d0005 | -0.47 | 12.53 | um03782 | -0.06 | 10.98 |
| 22d0005 | -0.08 | 8.61  | um03783 | 0.09  | 11.90 |
| 22d0005 | 0.11  | 10.84 | um03784 | -0.10 | 13.54 |
| 22d0005 | -0.74 | 13.09 | um03788 | 0.19  | 12.21 |
| 22d0005 | -0.10 | 12.83 | um03789 | -0.56 | 11.73 |
| 22d0005 | 0.21  | 12.35 | um03791 | 0.07  | 15.01 |
| 22d0005 | -0.25 | 11.80 | um03792 | -0.65 | 9.78  |
| 22d0005 | 0.04  | 12.23 | um03793 | 0.49  | 11.55 |
| 22d0005 | -0.18 | 11.92 | um03796 | 0.35  | 12.29 |
| 22d0005 | 0.01  | 11.72 | um03797 | -0.09 | 8.73  |

|         |       |       |         |       |       |
|---------|-------|-------|---------|-------|-------|
| 22d0006 | -0.43 | 12.62 | um03798 | -0.26 | 12.23 |
| 22d0006 | -0.14 | 12.19 | um03801 | -0.49 | 13.44 |
| 22d0006 | -0.01 | 12.91 | um03802 | 0.22  | 10.51 |
| 22d0006 | -0.65 | 15.55 | um03803 | -0.08 | 11.14 |
| 22d0006 | -4.08 | 13.17 | um03805 | -0.32 | 11.32 |
| 22d0006 | -0.60 | 12.33 | um03806 | 0.86  | 10.91 |
| 22d0006 | 0.08  | 12.61 | um03807 | 0.74  | 13.35 |
| 22d0006 | 0.26  | 13.11 | um03808 | -0.46 | 10.83 |
| 22d0006 | -0.19 | 12.51 | um03809 | -0.17 | 12.24 |
| 22d0006 | 0.34  | 12.40 | um03810 | 0.18  | 11.24 |
| 22d0007 | -0.77 | 13.11 | um03811 | -0.29 | 14.29 |
| 22d0007 | 0.07  | 11.41 | um03812 | -0.23 | 12.16 |
| 22d0007 | -0.38 | 12.63 | um03813 | -0.22 | 11.63 |
| 22d0007 | -0.34 | 12.45 | um03814 | -0.17 | 12.52 |
| 22d0007 | 0.32  | 11.62 | um03815 | 0.26  | 11.44 |
| 22d0007 | 0.55  | 12.35 | um03816 | 0.44  | 11.69 |
| 22d0007 | -0.42 | 11.91 | um03817 | 0.92  | 11.41 |
| 22d0007 | 0.70  | 12.54 | um03818 | 0.65  | 11.56 |
| 22d0007 | 0.00  | 12.00 | um03819 | -0.10 | 11.75 |
| 22d0007 | -0.19 | 12.58 | um03820 | 0.27  | 11.81 |
| 22d0008 | -0.49 | 10.82 | um03821 | -0.24 | 8.83  |
| 22d0008 | -0.14 | 11.02 | um03822 | -0.79 | 14.38 |
| 22d0008 | 0.09  | 9.04  | um03823 | -0.10 | 8.92  |
| 22d0008 | -0.19 | 9.80  | um03824 | -0.88 | 13.15 |
| 22d0008 | 0.02  | 11.47 | um03826 | -0.15 | 12.04 |
| 22d0008 | -0.05 | 11.67 | um03828 | -0.16 | 8.81  |
| 22d0008 | -0.40 | 12.85 | um03829 | 0.20  | 10.16 |
| 22d0008 | 0.24  | 11.41 | um03830 | -0.25 | 11.91 |
| 22d0008 | -0.76 | 10.57 | um03831 | 0.33  | 12.12 |
| 22d0008 | 0.15  | 13.01 | um03832 | -0.14 | 11.42 |
| 22d0009 | 0.19  | 12.56 | um03833 | -0.07 | 14.84 |
| 22d0009 | -0.59 | 10.90 | um03835 | -0.81 | 11.07 |
| 22d0009 | 0.00  | 11.71 | um03837 | -0.28 | 11.11 |
| 22d0009 | -0.12 | 10.67 | um03838 | -0.95 | 13.98 |
| 22d0009 | -2.56 | 12.78 | um03839 | -0.01 | 12.07 |
| 22d0009 | -0.59 | 15.32 | um03841 | -0.23 | 11.58 |
| 22d0009 | -0.17 | 12.68 | um03842 | -0.63 | 11.76 |
| 22d0009 | 0.00  | 8.70  | um03843 | -0.15 | 12.05 |
| 22d0009 | 0.34  | 13.74 | um03844 | 0.34  | 11.30 |
| 22d0009 | 0.42  | 12.99 | um03845 | 0.75  | 14.24 |
| 22d0010 | -0.34 | 12.04 | um03847 | 0.09  | 14.36 |
| 22d0010 | -0.55 | 14.08 | um03850 | 0.46  | 13.78 |
| 22d0010 | -0.31 | 15.46 | um03851 | -0.17 | 14.62 |
| 22d0010 | 0.35  | 11.99 | um03852 | -0.53 | 10.78 |
| 22d0010 | -0.44 | 13.79 | um03853 | -0.48 | 11.32 |
| 22d0010 | 0.14  | 10.93 | um03854 | -1.02 | 14.47 |
| 22d0010 | -0.19 | 13.77 | um03857 | -0.02 | 11.58 |
| 22d0010 | -0.02 | 8.54  | um03858 | -0.45 | 11.99 |
| 22d0010 | 0.08  | 10.71 | um03859 | -0.38 | 11.81 |
| 22d0010 | -0.04 | 13.01 | um03860 | -1.02 | 13.92 |
| 22d0011 | 0.26  | 15.44 | um03861 | -0.36 | 11.77 |
| 22d0011 | -0.34 | 12.02 | um03862 | 0.08  | 11.85 |
| 22d0011 | -0.03 | 13.93 | um03863 | -0.27 | 12.95 |
| 22d0011 | 0.32  | 13.12 | um03864 | -0.55 | 11.94 |

|         |       |       |         |       |       |
|---------|-------|-------|---------|-------|-------|
| 22d0011 | -0.11 | 9.75  | um03865 | 0.43  | 13.65 |
| 22d0011 | 0.33  | 13.51 | um03866 | 0.17  | 10.94 |
| 22d0011 | -0.14 | 9.57  | um03867 | 0.03  | 11.31 |
| 22d0011 | -0.04 | 12.74 | um03869 | 0.60  | 12.65 |
| 22d0011 | 0.44  | 11.84 | um03871 | -0.22 | 11.20 |
| 22d0011 | 0.55  | 10.16 | um03872 | 0.39  | 12.44 |
| 22d0012 | -0.04 | 12.98 | um03873 | 0.00  | 13.14 |
| 22d0012 | -0.04 | 10.88 | um03874 | -0.03 | 11.00 |
| 22d0012 | 0.56  | 14.68 | um03875 | -0.25 | 12.25 |
| 22d0012 | -0.32 | 13.67 | um03876 | 0.13  | 12.34 |
| 22d0012 | 0.07  | 11.50 | um03877 | -0.23 | 8.99  |
| 22d0012 | -0.34 | 11.82 | um03880 | 0.15  | 12.72 |
| 22d0012 | 0.00  | 14.16 | um03881 | 1.27  | 10.72 |
| 22d0012 | -0.52 | 13.05 | um03882 | 1.89  | 10.90 |
| 22d0012 | 0.03  | 11.03 | um03883 | -0.05 | 11.45 |
| 22d0012 | -0.05 | 11.31 | um03884 | -0.61 | 12.63 |
| 22d0013 | -0.02 | 12.50 | um03886 | -0.12 | 9.96  |
| 22d0013 | -0.39 | 11.88 | um03888 | 1.00  | 10.84 |
| 22d0013 | -0.35 | 12.48 | um03890 | 0.91  | 11.11 |
| 22d0013 | -0.81 | 14.22 | um03892 | 0.36  | 10.85 |
| 22d0013 | -0.07 | 11.88 | um03893 | 0.42  | 11.59 |
| 22d0013 | -0.11 | 9.45  | um03897 | -0.99 | 12.67 |
| 22d0013 | 0.33  | 14.10 | um03898 | 0.06  | 11.81 |
| 22d0013 | -0.28 | 9.10  | um03901 | -0.21 | 11.13 |
| 22d0013 | -1.10 | 9.53  | um03902 | -0.62 | 12.08 |
| 22d0013 | 0.16  | 12.58 | um03905 | -0.25 | 11.30 |
| 22d0014 | -0.50 | 12.30 | um03906 | -0.33 | 11.00 |
| 22d0014 | 0.13  | 9.03  | um03908 | -0.22 | 9.22  |
| 22d0014 | -0.21 | 10.99 | um03909 | 1.91  | 12.52 |
| 22d0014 | 0.24  | 12.29 | um03910 | 0.60  | 14.39 |
| 22d0014 | -0.31 | 10.62 | um03911 | 0.61  | 11.04 |
| 22d0014 | 0.04  | 9.15  | um03914 | 0.40  | 13.54 |
| 22d0014 | -0.64 | 12.08 | um03916 | -0.12 | 15.69 |
| 22d0014 | -0.30 | 10.74 | um03917 | 0.53  | 10.94 |
| 22d0014 | 0.12  | 10.75 | um03918 | -0.27 | 11.38 |
| 22d0014 | -0.22 | 12.22 | um03919 | 0.26  | 13.49 |
| 22d0015 | 0.53  | 9.18  | um03921 | -0.83 | 13.73 |
| 22d0015 | -0.07 | 10.41 | um03923 | 0.87  | 14.94 |
| 22d0015 | 0.21  | 10.57 | um03924 | -2.01 | 15.34 |
| 22d0015 | 0.64  | 10.95 | um03925 | 0.49  | 11.84 |
| 22d0015 | -0.59 | 12.88 | um03927 | 0.00  | 10.31 |
| 22d0015 | -0.46 | 14.21 | um03928 | 0.12  | 9.67  |
| 22d0015 | 0.14  | 9.81  | um03929 | -0.53 | 12.50 |
| 22d0015 | 0.29  | 11.12 | um03930 | -0.16 | 11.19 |
| 22d0015 | -0.24 | 12.39 | um03932 | 0.39  | 9.21  |
| 22d0015 | 0.25  | 12.19 | um03933 | -0.17 | 13.69 |
| 22d0016 | -0.56 | 13.27 | um03935 | -1.65 | 11.46 |
| 22d0016 | 0.12  | 8.79  | um03936 | 0.17  | 11.51 |
| 22d0016 | 0.11  | 9.28  | um03937 | 0.29  | 12.37 |
| 22d0016 | -0.53 | 12.45 | um03938 | -0.02 | 14.17 |
| 22d0016 | -0.24 | 12.41 | um03939 | 0.08  | 11.01 |
| 22d0016 | 0.13  | 9.62  | um03941 | 0.25  | 10.85 |
| 22d0016 | 0.57  | 9.26  | um03942 | -0.90 | 13.10 |
| 22d0016 | -0.41 | 12.64 | um03943 | -0.04 | 11.61 |

|         |       |       |         |       |       |
|---------|-------|-------|---------|-------|-------|
| 22d0016 | -0.19 | 10.94 | um03944 | -0.33 | 12.26 |
| 22d0016 | -0.33 | 11.21 | um03945 | -0.59 | 12.45 |
| 22d0017 | -0.40 | 11.63 | um03946 | 0.27  | 10.99 |
| 22d0017 | -0.02 | 10.15 | um03947 | -0.03 | 12.51 |
| 22d0017 | -0.45 | 11.11 | um03948 | 0.01  | 10.05 |
| 22d0017 | -0.34 | 12.07 | um03949 | -0.75 | 11.65 |
| 22d0017 | -0.01 | 9.08  | um03950 | 0.01  | 11.07 |
| 22d0017 | -0.34 | 11.41 | um03952 | 0.29  | 13.05 |
| 22d0017 | -0.56 | 12.35 | um03953 | 0.33  | 11.39 |
| 22d0017 | -0.17 | 11.19 | um03956 | -0.27 | 13.62 |
| 22d0017 | -0.97 | 10.72 | um03958 | -0.57 | 13.63 |
| 22d0017 | -0.12 | 12.37 | um03959 | -0.42 | 13.56 |
| 22d0018 | -0.56 | 12.31 | um03960 | 0.49  | 11.20 |
| 22d0018 | -0.25 | 9.41  | um03963 | -0.42 | 10.64 |
| 22d0018 | -0.67 | 13.11 | um03964 | 0.28  | 11.31 |
| 22d0018 | -0.29 | 12.06 | um03965 | 0.10  | 12.28 |
| 22d0018 | -0.74 | 11.97 | um03966 | 0.22  | 10.72 |
| 22d0018 | -0.07 | 11.50 | um03967 | -0.21 | 12.49 |
| 22d0018 | -0.51 | 11.27 | um03969 | 0.26  | 11.83 |
| 22d0018 | 0.06  | 12.29 | um03970 | 0.00  | 12.76 |
| 22d0018 | -0.03 | 9.00  | um03971 | 0.12  | 11.41 |
| 22d0018 | 0.51  | 12.26 | um03972 | 0.18  | 11.70 |
| 22d0019 | 0.23  | 10.63 | um03973 | 0.08  | 12.82 |
| 22d0019 | -0.45 | 12.73 | um03974 | -0.48 | 12.16 |
| 22d0019 | -0.81 | 11.13 | um03975 | 0.06  | 13.23 |
| 22d0019 | 0.10  | 13.82 | um03976 | 0.25  | 12.63 |
| 22d0019 | 0.18  | 13.43 | um03977 | -1.41 | 14.43 |
| 22d0019 | -0.21 | 10.11 | um03978 | 2.23  | 10.55 |
| 22d0019 | -0.71 | 11.79 | um03979 | 0.80  | 11.21 |
| 22d0019 | 0.20  | 11.94 | um03980 | -0.02 | 11.32 |
| 22d0019 | -0.40 | 12.07 | um03982 | 0.94  | 11.53 |
| 22d0019 | 0.12  | 11.35 | um03983 | 0.53  | 12.19 |
| 22d0020 | 0.30  | 13.57 | um03984 | -0.22 | 11.33 |
| 22d0020 | 0.02  | 11.17 | um03985 | 0.24  | 10.38 |
| 22d0020 | -0.25 | 13.29 | um03986 | -0.21 | 11.80 |
| 22d0020 | -1.00 | 13.04 | um03987 | -0.23 | 10.73 |
| 22d0020 | -0.11 | 8.91  | um03989 | 0.63  | 10.98 |
| 22d0020 | -0.29 | 11.13 | um03990 | -1.47 | 11.52 |
| 22d0020 | -0.74 | 11.68 | um03991 | 0.29  | 11.35 |
| 22d0020 | 0.06  | 12.03 | um03992 | -0.32 | 9.65  |
| 22d0020 | -0.12 | 11.11 | um03994 | 0.55  | 11.81 |
| 22d0020 | 0.36  | 10.90 | um03995 | -2.37 | 11.40 |
| 22d0021 | -0.40 | 11.91 | um03997 | -0.42 | 11.80 |
| 22d0021 | 0.07  | 10.78 | um04000 | 1.06  | 14.31 |
| 22d0021 | -0.75 | 12.01 | um04004 | -0.38 | 11.23 |
| 22d0021 | -0.12 | 12.84 | um04005 | 0.47  | 12.30 |
| 22d0021 | -0.41 | 11.86 | um04006 | 0.17  | 11.20 |
| 22d0021 | -0.31 | 13.80 | um04007 | 0.13  | 14.46 |
| 22d0021 | 0.23  | 11.45 | um04009 | 0.17  | 11.23 |
| 22d0021 | 0.62  | 13.95 | um04013 | 0.29  | 11.04 |
| 22d0021 | -0.17 | 13.06 | um04014 | 1.66  | 14.70 |
| 22d0021 | 0.30  | 10.06 | um04015 | 0.52  | 11.74 |
| 22d0022 | -0.35 | 12.75 | um04016 | 0.05  | 10.82 |
| 22d0022 | 0.09  | 9.12  | um04017 | 0.39  | 11.61 |

|         |       |       |         |       |       |
|---------|-------|-------|---------|-------|-------|
| 22d0022 | 0.51  | 10.78 | um04019 | -0.56 | 12.00 |
| 22d0022 | 0.26  | 15.14 | um04020 | 0.04  | 12.42 |
| 22d0022 | -0.42 | 11.21 | um04021 | 0.23  | 12.24 |
| 22d0022 | -0.82 | 12.65 | um04022 | 0.25  | 11.44 |
| 22d0022 | -0.24 | 13.24 | um04026 | 0.26  | 10.94 |
| 22d0022 | 0.10  | 10.08 | um04027 | 0.12  | 9.44  |
| 22d0022 | 0.10  | 11.64 | um04029 | -0.31 | 12.81 |
| 22d0022 | 0.15  | 12.08 | um04030 | 0.64  | 11.20 |
| 22d0023 | 0.12  | 10.52 | um04031 | 0.20  | 10.86 |
| 22d0023 | -0.40 | 11.26 | um04032 | 0.20  | 9.27  |
| 22d0023 | -0.12 | 15.62 | um04033 | -0.36 | 8.62  |
| 22d0023 | -0.09 | 10.55 | um04034 | 0.08  | 9.23  |
| 22d0023 | 0.03  | 14.33 | um04035 | 0.12  | 9.83  |
| 22d0023 | 0.23  | 10.34 | um04038 | -0.18 | 8.72  |
| 22d0023 | 1.15  | 13.15 | um04039 | -0.05 | 8.63  |
| 22d0023 | -0.06 | 12.16 | um04040 | 0.17  | 9.69  |
| 22d0023 | -0.07 | 9.26  | um04042 | 0.06  | 11.14 |
| 22d0023 | 0.91  | 11.93 | um04043 | -0.42 | 10.79 |
| 22d0024 | 0.04  | 11.05 | um04044 | 0.27  | 13.83 |
| 22d0024 | 0.42  | 13.12 | um04046 | 0.20  | 11.91 |
| 22d0024 | -0.08 | 10.05 | um04047 | -0.16 | 12.06 |
| 22d0024 | 0.07  | 12.46 | um04048 | 0.44  | 11.95 |
| 22d0024 | -0.16 | 11.52 | um04049 | 0.39  | 12.03 |
| 22d0024 | 0.08  | 8.85  | um04050 | -0.22 | 12.15 |
| 22d0024 | 0.09  | 9.52  | um04051 | 0.26  | 11.58 |
| 22d0024 | -1.87 | 12.44 | um04053 | 0.32  | 11.96 |
| 22d0024 | 0.15  | 11.29 | um04054 | 0.25  | 11.39 |
| 22d0024 | -0.41 | 15.07 | um04055 | 1.06  | 11.87 |
| 22d0025 | 0.15  | 11.81 | um04056 | 1.03  | 11.19 |
| 22d0025 | 0.13  | 9.69  | um04057 | -0.36 | 13.30 |
| 22d0025 | -0.12 | 9.96  | um04059 | 0.45  | 11.40 |
| 22d0025 | 0.02  | 11.00 | um04060 | 1.20  | 14.31 |
| 22d0025 | -0.08 | 13.88 | um04061 | -0.31 | 11.08 |
| 22d0025 | 0.71  | 13.59 | um04062 | 0.38  | 10.78 |
| 22d0025 | 1.06  | 12.44 | um04063 | 1.22  | 11.80 |
| 22d0025 | 0.39  | 13.03 | um04064 | 0.79  | 11.99 |
| 22d0025 | -0.20 | 11.54 | um04065 | 0.01  | 10.53 |
| 22d0025 | 1.18  | 13.76 | um04066 | 0.18  | 11.27 |
| 22d0026 | -1.27 | 10.01 | um04067 | -0.26 | 11.42 |
| 22d0026 | -1.12 | 10.38 | um04069 | 0.23  | 12.43 |
| 22d0026 | 0.18  | 11.11 | um04070 | 0.64  | 12.66 |
| 22d0026 | -0.27 | 12.52 | um04071 | 0.09  | 12.59 |
| 22d0026 | -0.23 | 9.98  | um04072 | 0.28  | 10.89 |
| 22d0026 | -0.01 | 12.99 | um04074 | 0.31  | 11.21 |
| 22d0026 | -0.33 | 10.61 | um04076 | 0.61  | 12.07 |
| 22d0026 | 0.34  | 12.18 | um04079 | 0.34  | 12.26 |
| 22d0026 | -0.03 | 11.90 | um04080 | -0.24 | 12.92 |
| 22d0026 | 0.38  | 9.06  | um04081 | -0.23 | 13.05 |
| 22d0027 | -0.01 | 11.48 | um04082 | -0.24 | 8.78  |
| 22d0027 | -1.30 | 14.97 | um04083 | -0.01 | 9.60  |
| 22d0027 | -0.11 | 9.38  | um04084 | -0.12 | 8.72  |
| 22d0027 | -0.79 | 10.60 | um04085 | -0.13 | 9.80  |
| 22d0027 | 0.15  | 9.47  | um04086 | -0.52 | 9.11  |
| 22d0027 | 0.01  | 11.36 | um04087 | -0.28 | 9.55  |

|         |       |       |         |       |       |
|---------|-------|-------|---------|-------|-------|
| 22d0027 | -0.46 | 12.76 | um04089 | 1.24  | 13.94 |
| 22d0027 | -0.14 | 9.79  | um04091 | -0.65 | 11.91 |
| 22d0027 | 0.03  | 10.51 | um04092 | -0.28 | 9.98  |
| 22d0027 | -0.38 | 12.31 | um04093 | -0.18 | 8.47  |
| 22d0028 | -0.57 | 11.49 | um04094 | 0.73  | 12.89 |
| 22d0028 | -0.10 | 8.68  | um04095 | -0.63 | 9.52  |
| 22d0028 | -0.82 | 12.76 | um04096 | -1.28 | 9.71  |
| 22d0028 | 0.27  | 11.93 | um04097 | -0.48 | 8.82  |
| 22d0028 | -0.56 | 12.55 | um04098 | -0.15 | 8.54  |
| 22d0028 | 0.23  | 14.39 | um04100 | -0.10 | 8.62  |
| 22d0028 | 0.86  | 12.34 | um04101 | -1.32 | 9.91  |
| 22d0028 | 0.05  | 10.48 | um04104 | -2.30 | 10.16 |
| 22d0028 | 0.10  | 13.02 | um04105 | -1.20 | 9.52  |
| 22d0028 | -0.54 | 11.96 | um04106 | -2.70 | 11.26 |
| 22d0029 | 0.39  | 9.65  | um04107 | -1.81 | 10.23 |
| 22d0029 | 0.28  | 13.47 | um04109 | -1.19 | 9.71  |
| 22d0029 | -0.02 | 11.47 | um04111 | -0.06 | 8.71  |
| 22d0029 | -0.18 | 11.79 | um04114 | -0.97 | 11.29 |
| 22d0029 | -0.06 | 13.17 | um04115 | -0.45 | 13.39 |
| 22d0029 | -0.26 | 9.62  | um04116 | -0.31 | 13.13 |
| 22d0029 | -0.11 | 10.15 | um04117 | 0.19  | 13.33 |
| 22d0029 | 0.10  | 12.63 | um04118 | 0.12  | 11.63 |
| 22d0029 | 0.05  | 11.02 | um04119 | -0.21 | 8.57  |
| 24c0000 | 0.20  | 15.67 | um04120 | 0.09  | 9.01  |
| 24c0000 | 0.02  | 15.88 | um04123 | 1.75  | 12.08 |
| 24c0000 | 0.12  | 11.02 | um04125 | 0.36  | 9.21  |
| 24c0000 | -0.92 | 11.93 | um04126 | 0.58  | 11.94 |
| 24c0000 | -0.43 | 13.42 | um04127 | -0.26 | 12.44 |
| 24c0000 | 0.17  | 12.61 | um04128 | -0.37 | 11.03 |
| 24c0000 | -0.48 | 14.36 | um04129 | 0.01  | 10.27 |
| 24c0000 | 0.02  | 13.58 | um04130 | -0.12 | 9.06  |
| 24c0000 | -0.79 | 15.33 | um04131 | -0.34 | 10.65 |
| 24c0001 | 0.07  | 9.41  | um04132 | 0.05  | 11.15 |
| 24c0001 | -0.96 | 13.31 | um04133 | -0.64 | 11.91 |
| 24c0001 | -0.05 | 14.18 | um04134 | 0.44  | 12.36 |
| 24c0001 | 0.13  | 11.35 | um04135 | 0.29  | 9.87  |
| 24c0001 | 0.15  | 11.20 | um04136 | -0.26 | 13.16 |
| 24c0001 | -0.07 | 8.92  | um04138 | -0.61 | 15.88 |
| 24c0001 | 0.36  | 13.08 | um04139 | 0.42  | 12.34 |
| 24c0001 | 0.14  | 11.46 | um04145 | -2.17 | 12.08 |
| 24c0001 | -0.02 | 10.33 | um04146 | 0.17  | 10.82 |
| 24c0001 | 0.13  | 12.02 | um04147 | 0.20  | 11.98 |
| 24c0002 | 0.22  | 12.07 | um04148 | 0.15  | 12.12 |
| 24c0002 | 0.10  | 13.06 | um04149 | 0.60  | 11.13 |
| 24c0002 | 0.35  | 12.18 | um04150 | -0.46 | 11.05 |
| 24c0002 | -0.78 | 11.38 | um04151 | 0.46  | 12.32 |
| 24c0002 | 0.15  | 12.22 | um04152 | -0.27 | 14.02 |
| 24c0002 | 0.52  | 14.49 | um04154 | 1.05  | 11.99 |
| 24c0002 | 0.23  | 11.94 | um04156 | -0.02 | 13.35 |
| 24c0002 | 0.48  | 11.83 | um04157 | 0.31  | 10.48 |
| 24c0002 | -0.09 | 13.32 | um04158 | -0.32 | 10.85 |
| 24c0002 | 0.29  | 11.86 | um04159 | 0.43  | 11.82 |
| 24c0003 | 0.23  | 11.66 | um04160 | 0.29  | 9.53  |
| 24c0003 | 0.30  | 11.93 | um04161 | 0.10  | 10.97 |



|         |       |       |         |       |       |
|---------|-------|-------|---------|-------|-------|
| 24c0003 | 0.06  | 11.26 | um04162 | -0.48 | 12.12 |
| 24c0003 | -0.21 | 12.84 | um04163 | 0.54  | 11.02 |
| 24c0003 | 0.09  | 8.48  | um04164 | 0.25  | 11.96 |
| 24c0003 | 0.32  | 10.73 | um04165 | -1.49 | 12.37 |
| 24c0003 | 0.10  | 11.67 | um04166 | -0.29 | 11.25 |
| 24c0003 | 0.19  | 11.00 | um04167 | 0.05  | 13.82 |
| 24c0003 | 0.20  | 12.38 | um04168 | 0.22  | 11.44 |
| 24c0003 | -0.68 | 12.43 | um04169 | -0.50 | 12.44 |
| 24c0004 | -0.28 | 12.03 | um04171 | 0.67  | 12.30 |
| 24c0004 | 0.33  | 12.79 | um04172 | 0.00  | 11.01 |
| 24c0004 | 0.48  | 12.57 | um04173 | -0.42 | 12.45 |
| 24c0004 | -0.54 | 12.20 | um04174 | 0.04  | 10.86 |
| 24c0004 | -0.12 | 8.67  | um04175 | -0.81 | 13.02 |
| 24c0004 | -0.08 | 8.63  | um04176 | -0.15 | 12.28 |
| 24c0004 | -0.04 | 8.80  | um04177 | 0.34  | 12.38 |
| 24c0004 | 0.67  | 13.03 | um04179 | -0.37 | 13.64 |
| 24c0004 | 0.28  | 13.92 | um04180 | 0.21  | 10.77 |
| 24c0004 | 0.51  | 13.27 | um04181 | 1.94  | 14.23 |
| 24c0005 | 0.08  | 11.33 | um04182 | -0.30 | 11.43 |
| 24c0005 | 0.66  | 13.43 | um04183 | 0.93  | 11.67 |
| 24c0005 | -0.46 | 13.71 | um04184 | -0.17 | 11.12 |
| 24c0005 | -0.53 | 13.93 | um04185 | 0.15  | 9.12  |
| 24c0005 | 0.28  | 13.26 | um04186 | -0.30 | 12.31 |
| 24c0005 | 0.51  | 13.32 | um04187 | -0.04 | 11.25 |
| 24c0005 | -0.31 | 13.81 | um04188 | 0.04  | 12.23 |
| 24c0005 | -0.45 | 11.80 | um04189 | -0.52 | 11.35 |
| 24c0005 | -0.09 | 11.58 | um04190 | -0.73 | 15.82 |
| 24c0005 | -0.14 | 8.68  | um04191 | 0.70  | 11.14 |
| 24c0006 | 0.07  | 13.56 | um04192 | -0.34 | 12.61 |
| 24c0006 | -0.52 | 15.41 | um04193 | 0.74  | 11.00 |
| 24c0006 | -0.16 | 11.68 | um04194 | 0.76  | 12.11 |
| 24c0006 | -0.03 | 9.06  | um04196 | 0.18  | 13.09 |
| 24c0006 | 0.08  | 8.82  | um04197 | -0.20 | 11.20 |
| 24c0006 | 0.52  | 10.87 | um04198 | -0.32 | 13.18 |
| 24c0006 | 0.16  | 12.74 | um04201 | 0.27  | 11.62 |
| 24c0006 | 0.25  | 12.09 | um04202 | 0.00  | 11.41 |
| 24c0006 | 1.02  | 12.08 | um04203 | 0.17  | 10.87 |
| 24c0006 | -0.16 | 9.11  | um04205 | -0.24 | 8.56  |
| 24c0007 | 0.42  | 12.38 | um04206 | 0.39  | 10.75 |
| 24c0007 | 0.76  | 13.41 | um04208 | 0.25  | 13.82 |
| 24c0007 | -0.19 | 12.54 | um04209 | -0.01 | 11.16 |
| 24c0007 | 0.27  | 11.36 | um04210 | -0.40 | 11.22 |
| 24d0000 | -0.17 | 14.17 | um04211 | 0.45  | 10.95 |
| 24d0000 | 0.32  | 15.21 | um04212 | 0.58  | 12.45 |
| 24d0000 | -0.01 | 15.96 | um04213 | 0.28  | 11.85 |
| 24d0000 | 0.01  | 13.96 | um04214 | 0.27  | 13.04 |
| 24d0000 | -0.35 | 11.34 | um04216 | 0.98  | 11.45 |
| 24d0000 | 0.47  | 12.71 | um04217 | -0.07 | 11.03 |
| 24d0000 | -0.37 | 10.80 | um04218 | 0.04  | 12.48 |
| 24d0000 | 0.02  | 8.75  | um04219 | 0.34  | 11.59 |
| 24d0000 | -0.22 | 10.94 | um04220 | -0.40 | 12.53 |
| 24d0001 | -0.24 | 11.86 | um04223 | 0.09  | 12.99 |
| 24d0001 | -0.08 | 10.17 | um04224 | -0.80 | 10.43 |
| 24d0001 | 0.78  | 12.18 | um04225 | -0.03 | 11.57 |

|         |       |       |         |       |       |
|---------|-------|-------|---------|-------|-------|
| 24d0001 | 0.71  | 13.13 | um04226 | -0.22 | 12.17 |
| 24d0001 | -0.31 | 12.04 | um04227 | -0.22 | 12.68 |
| 24d0001 | 0.23  | 12.36 | um04228 | -0.15 | 13.30 |
| 24d0001 | -0.11 | 12.25 | um04229 | 0.27  | 11.45 |
| 24d0001 | -0.07 | 12.48 | um04230 | 0.00  | 11.74 |
| 24d0001 | 0.19  | 12.51 | um04231 | 0.17  | 11.30 |
| 24d0001 | -0.20 | 14.07 | um04232 | 0.01  | 9.96  |
| 24d0002 | 0.11  | 12.17 | um04233 | 0.00  | 11.70 |
| 24d0002 | 0.88  | 14.65 | um04234 | 0.29  | 14.96 |
| 24d0002 | 0.59  | 10.53 | um04235 | -0.08 | 12.04 |
| 24d0002 | -0.06 | 9.35  | um04236 | 0.27  | 13.69 |
| 24d0002 | -0.02 | 12.59 | um04237 | -0.05 | 10.31 |
| 24d0002 | 0.13  | 12.46 | um04238 | -0.13 | 11.85 |
| 24d0002 | 0.05  | 12.38 | um04239 | 0.62  | 12.36 |
| 24d0002 | 0.16  | 10.32 | um04240 | 1.84  | 12.18 |
| 24d0002 | 0.16  | 12.35 | um04241 | -0.06 | 8.84  |
| 24d0002 | 0.08  | 12.95 | um04242 | 0.05  | 12.09 |
| 24d0003 | 0.26  | 11.63 | um04243 | -0.02 | 11.69 |
| 24d0003 | 0.34  | 11.75 | um04244 | 0.14  | 11.39 |
| 24d0003 | -0.23 | 11.95 | um04245 | -0.70 | 12.18 |
| 24d0003 | -0.28 | 11.05 | um04246 | 0.31  | 11.85 |
| 24d0003 | 0.68  | 11.13 | um04247 | -0.19 | 8.65  |
| 24d0003 | 0.12  | 12.87 | um04248 | -0.17 | 11.65 |
| 24d0003 | -0.21 | 12.18 | um04249 | -0.39 | 11.97 |
| 24d0003 | -0.13 | 15.81 | um04250 | 0.16  | 10.79 |
| 24d0003 | -0.45 | 15.49 | um04251 | -0.42 | 12.92 |
| 24d0003 | -0.16 | 9.55  | um04252 | 0.40  | 10.83 |
| 24d0004 | 0.01  | 10.95 | um04253 | -0.63 | 13.05 |
| 24d0004 | -0.05 | 9.29  | um04254 | 0.35  | 11.56 |
| 24d0004 | 0.23  | 12.99 | um04255 | -0.72 | 12.67 |
| 24d0004 | -0.06 | 8.66  | um04256 | -0.21 | 12.43 |
| 24d0004 | 0.31  | 11.96 | um04257 | 0.27  | 11.53 |
| 24d0004 | -0.01 | 11.22 | um04258 | 0.59  | 13.71 |
| 24d0004 | 0.38  | 13.93 | um04259 | -0.11 | 11.61 |
| 24d0004 | -0.15 | 12.20 | um04260 | -0.39 | 10.93 |
| 24d0004 | -0.33 | 12.94 | um04261 | -0.33 | 12.09 |
| 24d0004 | 0.13  | 8.68  | um04262 | 0.64  | 11.98 |
| 24d0005 | -0.04 | 13.07 | um04263 | 0.38  | 14.71 |
| 24d0005 | 0.76  | 13.12 | um04264 | -0.52 | 9.28  |
| 24d0005 | 1.32  | 14.96 | um04265 | -0.77 | 12.17 |
| 24d0005 | -0.25 | 12.91 | um04266 | 0.48  | 11.33 |
| 24d0005 | 2.46  | 10.82 | um04267 | -0.30 | 10.39 |
| 24d0005 | 0.01  | 12.05 | um04268 | -0.35 | 12.06 |
| 24d0005 | -0.05 | 13.12 | um04269 | -0.04 | 10.58 |
| 24d0005 | 0.24  | 12.61 | um04270 | -0.06 | 14.94 |
| 24d0005 | -0.30 | 12.94 | um04271 | 0.01  | 12.19 |
| 24d0005 | 0.15  | 13.23 | um04272 | 0.14  | 11.97 |
| 24d0006 | -0.32 | 11.99 | um04273 | -0.27 | 12.27 |
| 24d0006 | -0.11 | 8.36  | um04274 | 0.39  | 11.22 |
| 24d0006 | -0.32 | 11.44 | um04275 | 0.12  | 10.64 |
| 24d0006 | 0.06  | 12.41 | um04276 | 2.04  | 9.99  |
| 25c0000 | -0.05 | 8.57  | um04277 | 0.51  | 9.03  |
| 25c0000 | -0.90 | 11.90 | um04278 | 1.19  | 13.99 |
| 25c0000 | 0.56  | 11.85 | um04279 | 0.64  | 11.40 |

|         |       |       |         |       |       |
|---------|-------|-------|---------|-------|-------|
| 25c0000 | -0.58 | 12.33 | um04308 | 0.81  | 11.62 |
| 25c0000 | 0.71  | 13.40 | um04309 | 3.90  | 12.33 |
| 25c0000 | -0.45 | 11.71 | um04310 | 0.38  | 10.85 |
| 25c0000 | 0.15  | 12.42 | um04312 | -0.40 | 10.72 |
| 25c0000 | -0.05 | 11.41 | um04313 | 0.06  | 11.52 |
| 25c0000 | -0.18 | 11.67 | um04314 | -0.36 | 15.18 |
| 25c0001 | -0.40 | 12.66 | um04315 | -0.08 | 8.54  |
| 25c0001 | 0.18  | 12.37 | um04316 | -0.29 | 8.83  |
| 25c0001 | -0.50 | 12.14 | um04317 | 0.39  | 12.44 |
| 25c0001 | -0.42 | 13.32 | um04318 | 0.25  | 13.33 |
| 25c0001 | -0.57 | 12.12 | um04319 | 0.24  | 12.69 |
| 25c0001 | -0.91 | 9.35  | um04320 | -0.39 | 13.20 |
| 25c0001 | -0.14 | 9.01  | um04322 | -1.19 | 12.94 |
| 25c0001 | 0.04  | 9.69  | um04323 | -0.43 | 12.35 |
| 25c0001 | 0.20  | 11.47 | um04324 | -0.07 | 14.33 |
| 25c0001 | -0.62 | 11.99 | um04327 | 0.19  | 12.93 |
| 25c0002 | -1.81 | 13.47 | um04329 | 0.69  | 11.52 |
| 25c0002 | 0.13  | 10.35 | um04330 | 0.20  | 11.03 |
| 25c0002 | 0.14  | 11.64 | um04332 | 0.15  | 12.61 |
| 25c0002 | 0.19  | 12.32 | um04333 | -0.96 | 12.66 |
| 25c0002 | -0.10 | 15.75 | um04335 | -2.57 | 11.80 |
| 25c0002 | -0.31 | 10.77 | um04342 | -0.07 | 9.15  |
| 25c0002 | -0.12 | 9.47  | um04343 | 0.42  | 9.73  |
| 25c0002 | 0.08  | 12.79 | um04344 | -0.31 | 11.06 |
| 25c0002 | 0.25  | 13.34 | um04345 | -0.38 | 14.23 |
| 25c0002 | 0.02  | 10.66 | um04346 | 0.05  | 11.03 |
| 25c0003 | 0.03  | 13.59 | um04347 | 1.80  | 11.88 |
| 25c0003 | -0.20 | 9.22  | um04348 | -0.06 | 11.01 |
| 25c0003 | -0.14 | 8.89  | um04350 | 0.32  | 11.88 |
| 25c0003 | -0.44 | 12.54 | um04351 | 0.24  | 12.47 |
| 25c0003 | 1.00  | 14.27 | um04352 | -0.59 | 12.18 |
| 25c0003 | 0.05  | 12.06 | um04353 | -3.04 | 11.28 |
| 25c0003 | -0.50 | 12.01 | um04354 | -2.47 | 11.38 |
| 25c0003 | 0.22  | 12.77 | um04355 | 0.24  | 12.39 |
| 25c0003 | -0.10 | 12.95 | um04356 | -0.20 | 10.58 |
| 25c0003 | -0.04 | 11.81 | um04357 | -2.84 | 11.44 |
| 25c0004 | -0.18 | 13.45 | um04358 | -3.26 | 11.37 |
| 25c0004 | -0.47 | 12.15 | um04361 | 0.21  | 10.52 |
| 25c0004 | -0.33 | 12.75 | um04362 | 0.56  | 12.58 |
| 25c0004 | -0.77 | 11.51 | um04364 | 2.07  | 10.85 |
| 25c0004 | -0.20 | 12.96 | um04365 | -0.13 | 10.75 |
| 25c0004 | 0.30  | 12.79 | um04367 | -0.12 | 8.76  |
| 25c0004 | 0.25  | 11.73 | um04368 | 0.26  | 10.24 |
| 25c0004 | 0.38  | 12.64 | um04370 | -0.39 | 11.72 |
| 25c0004 | -0.25 | 11.57 | um04371 | -0.17 | 12.58 |
| 25c0004 | 0.23  | 14.52 | um04372 | -0.27 | 11.86 |
| 25c0005 | -0.05 | 12.22 | um04374 | -0.11 | 13.52 |
| 25c0005 | 0.39  | 12.08 | um04375 | -0.16 | 11.24 |
| 25c0005 | 0.53  | 11.50 | um04376 | -0.61 | 11.03 |
| 25c0005 | -0.15 | 9.11  | um04378 | -0.53 | 11.41 |
| 25c0005 | 0.06  | 11.45 | um04379 | -2.77 | 11.81 |
| 25c0005 | -0.02 | 11.11 | um04380 | 0.15  | 12.16 |
| 25c0005 | -0.03 | 10.61 | um04381 | -0.15 | 11.92 |
| 25c0005 | 0.01  | 13.13 | um04382 | 0.88  | 12.65 |

|         |       |       |         |       |       |
|---------|-------|-------|---------|-------|-------|
| 25c0005 | 0.20  | 10.18 | um04383 | 0.10  | 13.36 |
| 25c0005 | -0.14 | 12.27 | um04384 | 0.90  | 13.51 |
| 25c0006 | -0.82 | 11.83 | um04385 | 0.45  | 11.73 |
| 25c0006 | 0.23  | 12.14 | um04388 | -0.23 | 13.39 |
| 25c0006 | -0.21 | 12.52 | um04389 | -0.38 | 11.95 |
| 25c0006 | 0.14  | 12.36 | um04390 | -0.03 | 12.44 |
| 25c0006 | 0.33  | 12.62 | um04391 | 0.10  | 11.90 |
| 25c0006 | 0.15  | 9.87  | um04392 | -0.12 | 12.52 |
| 25c0006 | 0.42  | 12.03 | um04393 | -0.90 | 10.36 |
| 25c0006 | 0.32  | 12.15 | um04394 | -0.55 | 11.93 |
| 25c0006 | 0.56  | 9.71  | um04397 | -0.57 | 12.01 |
| 25c0006 | -0.04 | 11.69 | um04398 | -0.51 | 12.56 |
| 25c0007 | 0.01  | 9.48  | um04399 | 0.39  | 13.54 |
| 25c0007 | 0.62  | 13.72 | um04400 | -0.51 | 15.44 |
| 25c0007 | 0.19  | 9.31  | um04401 | -0.01 | 12.99 |
| 25c0007 | -0.09 | 9.05  | um04402 | -0.15 | 11.34 |
| 25c0007 | -0.28 | 13.57 | um04404 | 0.59  | 10.49 |
| 25c0007 | -0.33 | 13.55 | um04405 | -0.34 | 12.23 |
| 25c0007 | -0.29 | 13.14 | um04406 | -0.55 | 11.92 |
| 25c0007 | -0.32 | 14.00 | um04407 | 0.22  | 11.63 |
| 25c0007 | -0.43 | 13.17 | um04410 | -1.52 | 13.67 |
| 25c0007 | -0.32 | 10.20 | um04411 | 0.03  | 11.04 |
| 25c0008 | -0.89 | 12.31 | um04413 | -0.41 | 11.53 |
| 25c0008 | -1.29 | 11.74 | um04414 | -0.50 | 10.43 |
| 25c0008 | -1.08 | 11.33 | um04415 | -0.12 | 10.61 |
| 25c0008 | 0.35  | 12.55 | um04416 | -0.31 | 11.15 |
| 25c0008 | -0.05 | 11.34 | um04417 | -0.43 | 13.05 |
| 25c0008 | -0.71 | 9.44  | um04419 | 0.40  | 12.37 |
| 25c0008 | 0.08  | 8.63  | um04420 | 0.85  | 12.14 |
| 25c0008 | -0.17 | 9.01  | um04421 | 0.50  | 10.60 |
| 25c0008 | -0.07 | 8.83  | um04422 | -0.02 | 10.07 |
| 25c0008 | 0.00  | 8.54  | um04423 | -0.52 | 11.61 |
| 25c0009 | 0.10  | 8.69  | um04424 | -0.08 | 9.92  |
| 25d0000 | 0.16  | 8.75  | um04426 | -0.46 | 13.57 |
| 25d0000 | -1.35 | 11.28 | um04427 | 0.57  | 11.66 |
| 25d0000 | -0.23 | 11.80 | um04428 | -0.28 | 11.64 |
| 25d0000 | -0.07 | 14.30 | um04429 | -0.76 | 12.79 |
| 25d0000 | 0.06  | 12.92 | um04430 | 0.02  | 13.23 |
| 25d0000 | 0.72  | 12.08 | um04433 | 1.45  | 9.97  |
| 25d0000 | 0.25  | 10.19 | um04441 | 0.20  | 13.50 |
| 25d0000 | 0.11  | 11.69 | um04442 | -0.47 | 13.16 |
| 25d0000 | -0.11 | 12.30 | um04443 | -0.82 | 11.57 |
| 25d0001 | -0.12 | 15.85 | um04444 | 1.73  | 11.20 |
| 25d0001 | 0.23  | 10.75 | um04446 | 0.15  | 12.87 |
| 25d0001 | -0.02 | 10.29 | um04447 | 0.30  | 12.11 |
| 25d0001 | 0.31  | 12.65 | um04448 | -0.51 | 12.71 |
| 25d0001 | 0.14  | 9.27  | um04451 | -0.12 | 12.41 |
| 25d0001 | 0.36  | 15.19 | um04456 | -0.03 | 12.50 |
| 25d0001 | 0.18  | 12.09 | um04457 | 0.01  | 13.60 |
| 25d0001 | 0.09  | 12.34 | um04460 | 0.01  | 11.22 |
| 25d0001 | -0.31 | 11.81 | um04461 | -0.04 | 12.06 |
| 25d0001 | -0.24 | 12.55 | um04462 | -0.10 | 11.36 |
| 25d0002 | 0.59  | 13.29 | um04463 | 0.14  | 12.73 |
| 25d0002 | -0.02 | 8.96  | um04464 | -0.07 | 11.70 |

|         |       |       |         |       |       |
|---------|-------|-------|---------|-------|-------|
| 25d0002 | -0.43 | 12.31 | um04465 | 0.35  | 10.97 |
| 25d0002 | 0.35  | 12.67 | um04466 | -0.41 | 11.75 |
| 25d0002 | -0.42 | 12.91 | um04468 | 0.11  | 11.50 |
| 25d0002 | 0.21  | 9.66  | um04470 | -0.35 | 13.15 |
| 25d0002 | 0.10  | 12.60 | um04471 | -0.38 | 12.70 |
| 25d0002 | 0.11  | 12.35 | um04472 | 0.44  | 10.93 |
| 25d0002 | -1.39 | 13.54 | um04473 | 0.09  | 11.11 |
| 25d0002 | 0.55  | 12.49 | um04474 | 0.63  | 12.06 |
| 25d0003 | -0.46 | 13.29 | um04475 | 0.38  | 12.02 |
| 25d0003 | 0.20  | 14.74 | um04477 | -0.27 | 12.05 |
| 25d0003 | -0.28 | 11.51 | um04478 | -0.50 | 12.35 |
| 25d0003 | 0.21  | 12.98 | um04479 | 1.44  | 12.92 |
| 25d0003 | -0.06 | 11.09 | um04480 | 1.59  | 12.06 |
| 25d0003 | -0.14 | 10.51 | um04481 | 0.93  | 10.28 |
| 25d0003 | 0.46  | 13.15 | um04482 | -2.10 | 13.38 |
| 25d0003 | 0.66  | 12.78 | um04484 | -1.40 | 12.19 |
| 25d0003 | 0.14  | 15.64 | um04485 | -0.06 | 11.79 |
| 25d0003 | -0.29 | 13.39 | um04486 | 0.29  | 10.88 |
| 25d0004 | 0.20  | 13.03 | um04487 | 0.08  | 11.23 |
| 25d0004 | 0.43  | 12.35 | um04488 | 0.37  | 12.09 |
| 25d0004 | -0.18 | 12.44 | um04489 | -0.17 | 12.35 |
| 25d0004 | 0.03  | 13.50 | um04490 | 0.12  | 15.40 |
| 25d0004 | 0.50  | 14.26 | um04491 | 1.14  | 10.63 |
| 25d0004 | -0.22 | 14.02 | um04494 | 0.05  | 11.78 |
| 25d0004 | -0.34 | 13.45 | um04495 | -0.20 | 10.95 |
| 25d0004 | -1.27 | 13.41 | um04496 | -0.86 | 11.19 |
| 25d0004 | 0.09  | 13.12 | um04497 | -0.66 | 13.09 |
| 25d0004 | 0.59  | 10.49 | um04498 | -0.31 | 12.07 |
| 25d0005 | -0.24 | 12.99 | um04499 | -0.58 | 12.62 |
| 25d0005 | 0.27  | 11.63 | um04500 | 0.01  | 12.19 |
| 25d0005 | 0.37  | 12.08 | um04501 | 0.17  | 10.70 |
| 25d0005 | -0.50 | 12.60 | um04503 | -0.01 | 8.85  |
| 25d0005 | -0.03 | 13.10 | um04505 | -0.03 | 11.30 |
| 25d0005 | -0.02 | 8.85  | um04506 | 1.38  | 11.62 |
| 25d0005 | 0.18  | 12.22 | um04508 | 0.55  | 10.39 |
| 25d0005 | 0.28  | 11.63 | um04509 | 0.14  | 11.24 |
| 25d0005 | -0.57 | 12.53 | um04510 | -0.30 | 11.81 |
| 25d0005 | 0.11  | 13.43 | um04511 | 0.06  | 13.05 |
| 25d0006 | -0.11 | 12.09 | um04512 | -0.44 | 10.29 |
| 25d0006 | -0.45 | 13.25 | um04514 | -0.22 | 12.67 |
| 25d0006 | 0.64  | 9.38  | um04516 | 0.11  | 11.44 |
| 25d0006 | 0.34  | 13.17 | um04517 | 0.19  | 11.28 |
| 25d0006 | -0.20 | 13.06 | um04518 | -0.33 | 12.09 |
| 25d0006 | -0.10 | 12.13 | um04522 | 0.31  | 10.63 |
| 25d0006 | 0.29  | 10.67 | um04523 | -0.11 | 14.37 |
| 25d0006 | -0.21 | 11.26 | um04524 | -0.37 | 11.27 |
| 25d0006 | 0.19  | 9.27  | um04525 | 0.44  | 12.77 |
| 25d0006 | -0.27 | 10.73 | um04526 | -0.25 | 8.68  |
| 25d0007 | 0.24  | 14.05 | um04528 | 2.19  | 12.84 |
| 25d0007 | 0.11  | 10.64 | um04529 | -0.49 | 9.78  |
| 25d0007 | 1.22  | 10.38 | um04530 | -1.51 | 13.53 |
| 25d0007 | 0.32  | 11.46 | um04531 | 0.32  | 12.58 |
| 25d0007 | 0.15  | 11.26 | um04532 | 0.47  | 12.04 |
| 25d0007 | -0.63 | 11.51 | um04533 | -0.86 | 13.01 |

|         |       |       |         |       |       |
|---------|-------|-------|---------|-------|-------|
| 25d0007 | -0.17 | 10.89 | um04535 | -0.60 | 11.20 |
| 25d0007 | -0.40 | 12.04 | um04537 | 0.20  | 10.75 |
| 25d0007 | 0.15  | 10.52 | um04538 | -1.12 | 11.65 |
| 25d0007 | 0.63  | 12.20 | um04539 | -0.11 | 11.88 |
| 25d0008 | -1.38 | 11.74 | um04541 | -0.12 | 12.94 |
| 25d0008 | 0.02  | 8.70  | um04542 | -0.62 | 11.56 |
| 25d0008 | -0.69 | 10.24 | um04543 | 0.49  | 11.37 |
| 25d0008 | 0.12  | 9.01  | um04544 | -0.29 | 12.86 |
| 25d0008 | -0.44 | 10.23 | um04546 | 0.25  | 10.47 |
| 25d0008 | 0.38  | 14.58 | um04549 | 0.31  | 11.46 |
| 25d0008 | 0.00  | 12.78 | um04550 | -1.03 | 12.41 |
| 25d0008 | -0.04 | 9.68  | um04551 | -0.04 | 11.45 |
| 25d0008 | 0.19  | 9.37  | um04553 | 1.12  | 13.46 |
| 25d0008 | -0.08 | 9.00  | um04555 | -0.67 | 12.43 |
| 25d0009 | -0.22 | 8.91  | um04557 | 2.97  | 11.14 |
| 25d0009 | -0.10 | 8.54  | um04558 | 0.07  | 9.98  |
| 25d0009 | -0.03 | 8.64  | um04559 | 0.70  | 9.98  |
| 25d0009 | -0.25 | 8.89  | um04560 | 0.46  | 12.65 |
| 25d0009 | -0.09 | 9.05  | um04561 | 0.85  | 11.39 |
| 25d0009 | -0.20 | 8.89  | um04562 | 0.05  | 13.97 |
| 26c0000 | -0.68 | 10.15 | um04563 | 0.33  | 10.63 |
| 26c0000 | -0.12 | 8.76  | um04566 | -0.35 | 11.81 |
| 26c0000 | -0.01 | 8.41  | um04570 | -0.11 | 8.65  |
| 26c0000 | -0.08 | 8.60  | um04572 | 0.13  | 10.52 |
| 26c0000 | -0.43 | 9.08  | um04573 | 0.46  | 12.42 |
| 26c0000 | -0.14 | 10.48 | um04575 | 2.58  | 12.46 |
| 26c0000 | 0.17  | 9.98  | um04576 | 0.05  | 12.37 |
| 26c0000 | 0.12  | 10.34 | um04577 | -3.23 | 14.46 |
| 26c0000 | 0.00  | 8.96  | um04578 | -1.22 | 11.86 |
| 26c0001 | 0.75  | 14.40 | um04579 | 0.22  | 13.39 |
| 26c0001 | 0.48  | 14.72 | um04580 | -0.01 | 12.52 |
| 26c0001 | 0.20  | 12.81 | um04581 | 0.22  | 13.90 |
| 26c0001 | 0.22  | 11.25 | um04584 | -0.33 | 12.43 |
| 26c0001 | 0.19  | 10.13 | um04587 | 0.35  | 10.40 |
| 26c0001 | 0.00  | 12.06 | um04588 | -0.37 | 15.63 |
| 26c0001 | 0.04  | 12.01 | um04590 | -0.16 | 12.54 |
| 26c0001 | 0.25  | 12.02 | um04591 | 0.30  | 11.12 |
| 26c0001 | -0.16 | 12.08 | um04592 | -0.40 | 12.32 |
| 26c0001 | -0.06 | 12.66 | um04593 | 0.08  | 11.52 |
| 26c0002 | -0.05 | 13.00 | um04594 | -0.15 | 11.64 |
| 26c0002 | -0.86 | 12.84 | um04598 | -0.51 | 12.44 |
| 26c0002 | -0.01 | 12.04 | um04599 | 0.41  | 11.27 |
| 26c0002 | 0.18  | 12.37 | um04601 | 0.09  | 8.83  |
| 26c0002 | -0.18 | 13.41 | um04602 | -0.62 | 11.97 |
| 26c0002 | -0.44 | 11.76 | um04603 | -0.32 | 11.45 |
| 26c0002 | 0.51  | 11.91 | um04604 | -0.08 | 13.78 |
| 26c0002 | -0.33 | 12.24 | um04605 | -0.13 | 12.84 |
| 26c0002 | -0.34 | 11.17 | um04607 | -0.18 | 10.50 |
| 26c0002 | 0.52  | 12.71 | um04609 | 0.11  | 12.01 |
| 26c0003 | 0.43  | 10.49 | um04610 | -0.04 | 11.28 |
| 26c0003 | 0.16  | 11.43 | um04611 | -0.07 | 14.71 |
| 26c0003 | -0.18 | 10.63 | um04612 | -0.86 | 11.96 |
| 26c0003 | 0.62  | 12.99 | um04613 | -0.12 | 10.88 |
| 26c0003 | 0.57  | 10.17 | um04614 | -0.98 | 9.36  |

|         |       |       |         |       |       |
|---------|-------|-------|---------|-------|-------|
| 26c0003 | 0.50  | 11.64 | um04615 | 1.91  | 11.69 |
| 26c0003 | -0.52 | 14.20 | um04616 | 1.69  | 11.97 |
| 26c0003 | 0.58  | 12.97 | um04619 | -0.11 | 12.66 |
| 26c0003 | -0.09 | 8.73  | um04621 | 0.00  | 10.50 |
| 26c0003 | 0.18  | 11.06 | um04622 | 0.52  | 11.73 |
| 26c0004 | 0.27  | 13.26 | um04623 | -0.42 | 10.67 |
| 26c0004 | 0.38  | 10.66 | um04624 | -0.06 | 11.81 |
| 26c0004 | -0.01 | 8.91  | um04625 | 0.56  | 10.78 |
| 26c0004 | -0.94 | 13.27 | um04627 | -0.12 | 10.99 |
| 26c0004 | 0.04  | 11.68 | um04628 | -0.23 | 10.30 |
| 26c0004 | -0.08 | 9.11  | um04629 | -2.24 | 13.12 |
| 26c0004 | -0.16 | 9.25  | um04630 | 0.39  | 11.71 |
| 26c0004 | 0.19  | 9.26  | um04632 | -0.17 | 15.62 |
| 26c0004 | -0.09 | 9.79  | um04637 | 0.14  | 11.29 |
| 26c0004 | 0.00  | 14.32 | um04639 | -0.14 | 12.47 |
| 26c0005 | -0.24 | 13.42 | um04641 | -0.38 | 14.47 |
| 26c0005 | 0.07  | 13.90 | um04644 | -0.85 | 11.58 |
| 26c0005 | 0.17  | 12.02 | um04646 | -0.28 | 10.08 |
| 26c0005 | -0.07 | 9.10  | um04649 | -0.19 | 12.11 |
| 26c0005 | 0.24  | 11.47 | um04650 | -0.41 | 11.36 |
| 26c0005 | -0.46 | 11.68 | um04654 | 0.20  | 11.32 |
| 26c0005 | 0.09  | 12.09 | um04655 | 0.10  | 11.08 |
| 26c0005 | 0.51  | 13.32 | um04656 | 0.01  | 11.32 |
| 26c0005 | -0.61 | 12.44 | um04657 | 0.38  | 12.12 |
| 26c0005 | 0.29  | 13.41 | um04658 | 0.03  | 12.71 |
| 26c0006 | -0.02 | 8.55  | um04659 | -0.11 | 12.08 |
| 26c0006 | 0.16  | 11.22 | um04661 | -0.05 | 12.31 |
| 26c0006 | -0.11 | 8.74  | um04665 | -0.05 | 11.08 |
| 26c0006 | 0.14  | 10.68 | um04666 | -0.53 | 12.81 |
| 26c0006 | 0.01  | 13.88 | um04667 | 0.33  | 9.49  |
| 26c0006 | 0.05  | 11.27 | um04668 | 0.02  | 10.62 |
| 26c0006 | -0.56 | 13.10 | um04669 | 0.57  | 11.02 |
| 26c0006 | 0.44  | 12.21 | um04671 | -0.99 | 11.98 |
| 26c0006 | 0.22  | 12.46 | um04672 | 0.07  | 10.72 |
| 26c0006 | 0.12  | 12.91 | um04673 | 0.38  | 11.35 |
| 26c0007 | 0.66  | 11.69 | um04674 | 0.08  | 11.69 |
| 26c0007 | 0.34  | 11.75 | um04676 | -0.13 | 10.22 |
| 26c0007 | 0.11  | 13.25 | um04677 | -0.36 | 10.38 |
| 26c0007 | 0.16  | 12.73 | um04678 | 0.13  | 13.44 |
| 26c0007 | -0.48 | 11.99 | um04679 | 0.11  | 11.18 |
| 26c0007 | -0.45 | 11.11 | um04680 | -0.23 | 11.21 |
| 26c0007 | 0.16  | 13.15 | um04681 | 0.06  | 10.62 |
| 26c0007 | 0.45  | 11.40 | um04682 | 0.71  | 11.83 |
| 26c0007 | 0.21  | 11.15 | um04683 | 0.06  | 11.59 |
| 26c0007 | 0.30  | 13.25 | um04686 | 0.70  | 11.64 |
| 26c0008 | -0.95 | 11.05 | um04688 | 0.85  | 11.63 |
| 26c0008 | -0.22 | 11.52 | um04689 | 0.05  | 10.66 |
| 26c0008 | -0.17 | 11.06 | um04693 | -0.45 | 11.34 |
| 26c0008 | -0.51 | 12.51 | um04695 | 1.17  | 11.32 |
| 26c0008 | -0.26 | 12.72 | um04696 | 1.73  | 10.08 |
| 26c0008 | 0.14  | 9.78  | um04697 | -1.23 | 10.58 |
| 26c0008 | 0.22  | 13.12 | um04698 | -0.20 | 10.58 |
| 26c0008 | -0.39 | 11.99 | um04700 | 0.02  | 12.48 |
| 26c0008 | -0.31 | 13.14 | um04701 | 0.03  | 12.51 |

|         |       |       |         |       |       |
|---------|-------|-------|---------|-------|-------|
| 26c0008 | -0.10 | 12.75 | um04702 | 0.25  | 11.26 |
| 26c0009 | -0.02 | 11.48 | um04703 | -0.56 | 13.43 |
| 26c0009 | 0.23  | 12.18 | um04704 | 0.06  | 11.98 |
| 26c0009 | 0.23  | 9.85  | um04705 | -0.92 | 11.13 |
| 26c0009 | -0.44 | 12.64 | um04707 | 0.56  | 13.30 |
| 26c0009 | -1.43 | 13.87 | um04711 | 0.10  | 12.64 |
| 26c0009 | 0.11  | 8.99  | um04712 | -0.04 | 11.74 |
| 26c0009 | 0.06  | 11.37 | um04713 | -0.29 | 11.67 |
| 26c0009 | 0.10  | 9.11  | um04714 | 0.40  | 11.41 |
| 26c0009 | 0.38  | 10.42 | um04715 | -0.41 | 13.03 |
| 26d0000 | -0.22 | 8.77  | um04716 | -0.75 | 14.61 |
| 26d0000 | -0.09 | 9.08  | um04720 | -0.09 | 11.98 |
| 26d0000 | -0.53 | 10.48 | um04721 | -0.16 | 12.25 |
| 26d0000 | -0.53 | 11.79 | um04722 | 0.10  | 12.71 |
| 26d0000 | 0.11  | 12.37 | um04723 | 0.33  | 11.54 |
| 26d0000 | 0.55  | 13.67 | um04724 | -0.04 | 12.58 |
| 26d0000 | -0.17 | 14.03 | um04726 | -0.59 | 12.04 |
| 26d0000 | 0.20  | 12.12 | um04727 | -0.95 | 10.35 |
| 26d0000 | 0.31  | 11.42 | um04728 | 0.85  | 11.33 |
| 26d0001 | 0.28  | 11.89 | um04731 | -0.17 | 8.70  |
| 26d0001 | -0.06 | 12.84 | um04732 | 0.38  | 11.14 |
| 26d0001 | 0.56  | 12.48 | um04733 | 0.12  | 14.73 |
| 26d0001 | 0.18  | 10.10 | um04734 | -0.42 | 12.31 |
| 26d0001 | 0.16  | 11.92 | um04736 | -0.05 | 11.97 |
| 26d0001 | 0.02  | 12.49 | um04737 | 2.49  | 13.61 |
| 26d0001 | 0.11  | 11.25 | um04738 | 1.47  | 13.31 |
| 26d0001 | 0.09  | 13.71 | um04739 | 0.19  | 13.33 |
| 26d0001 | 0.04  | 8.86  | um04740 | 0.62  | 12.23 |
| 26d0001 | -0.18 | 13.21 | um04742 | 1.53  | 14.05 |
| 26d0002 | -0.63 | 12.03 | um04743 | -0.38 | 11.98 |
| 26d0002 | -0.20 | 11.94 | um04744 | -0.15 | 11.42 |
| 26d0002 | 0.08  | 14.08 | um04745 | 0.06  | 13.05 |
| 26d0002 | 0.06  | 13.25 | um04748 | 0.08  | 11.98 |
| 26d0002 | -0.39 | 13.28 | um04749 | 0.02  | 12.30 |
| 26d0002 | -0.05 | 12.18 | um04750 | 0.06  | 11.26 |
| 26d0002 | 0.44  | 10.46 | um04751 | 0.19  | 11.77 |
| 26d0002 | 0.03  | 10.71 | um04752 | 0.05  | 10.73 |
| 26d0002 | -0.01 | 9.38  | um04753 | 0.33  | 11.12 |
| 26d0002 | 0.11  | 11.51 | um04755 | -0.24 | 10.94 |
| 26d0003 | 0.61  | 12.63 | um04758 | 0.45  | 10.59 |
| 26d0003 | -0.02 | 13.15 | um04761 | 0.26  | 14.71 |
| 26d0003 | 0.29  | 12.68 | um04764 | 0.32  | 12.93 |
| 26d0003 | -0.68 | 14.82 | um04765 | -0.13 | 11.21 |
| 26d0003 | -0.24 | 12.37 | um04767 | 0.13  | 12.68 |
| 26d0003 | -0.28 | 12.85 | um04768 | -0.31 | 12.15 |
| 26d0003 | -0.05 | 13.82 | um04770 | 0.39  | 10.77 |
| 26d0003 | 0.17  | 13.06 | um04771 | -0.79 | 13.86 |
| 26d0003 | -0.21 | 11.89 | um04772 | 0.64  | 9.51  |
| 26d0003 | 0.05  | 13.65 | um04773 | 0.50  | 10.98 |
| 26d0004 | -0.02 | 14.14 | um04775 | 0.22  | 10.78 |
| 26d0004 | -0.02 | 12.29 | um04776 | -1.12 | 13.91 |
| 26d0004 | -0.26 | 12.49 | um04777 | 0.00  | 8.82  |
| 26d0004 | 0.30  | 11.85 | um04778 | 0.13  | 9.32  |
| 26d0004 | 0.41  | 11.40 | um04779 | -0.12 | 11.25 |



|         |       |       |         |       |       |
|---------|-------|-------|---------|-------|-------|
| 26d0004 | -1.13 | 13.03 | um04781 | 0.64  | 12.36 |
| 26d0004 | 0.30  | 9.54  | um04782 | -0.06 | 12.19 |
| 26d0004 | -0.10 | 11.46 | um04785 | 0.12  | 12.52 |
| 26d0004 | 1.49  | 13.00 | um04786 | -0.60 | 12.24 |
| 26d0004 | 0.02  | 15.00 | um04787 | -0.90 | 10.70 |
| 26d0005 | -0.16 | 14.72 | um04789 | -0.10 | 10.75 |
| 26d0005 | 0.15  | 11.85 | um04790 | -0.11 | 8.65  |
| 26d0005 | 0.23  | 13.08 | um04791 | 0.62  | 9.65  |
| 26d0005 | -0.39 | 11.84 | um04793 | 0.13  | 13.78 |
| 26d0005 | 0.12  | 12.11 | um04794 | 1.14  | 13.97 |
| 26d0005 | -0.35 | 11.03 | um04795 | 0.39  | 11.92 |
| 26d0005 | 0.39  | 8.88  | um04796 | 0.96  | 12.85 |
| 26d0005 | 0.61  | 12.02 | um04797 | 0.01  | 12.33 |
| 26d0005 | 0.69  | 13.58 | um04798 | -0.41 | 10.95 |
| 26d0005 | -0.36 | 12.91 | um04799 | 0.47  | 11.58 |
| 26d0006 | -0.67 | 9.30  | um04800 | 0.41  | 12.51 |
| 26d0006 | -0.70 | 13.08 | um04801 | 0.90  | 12.94 |
| 26d0006 | -0.02 | 11.89 | um04802 | -0.02 | 14.40 |
| 26d0006 | 0.20  | 9.42  | um04804 | 0.23  | 9.09  |
| 26d0006 | 0.21  | 11.67 | um04805 | 1.02  | 11.08 |
| 26d0006 | 0.07  | 13.31 | um04806 | 0.95  | 11.26 |
| 26d0006 | 0.18  | 11.37 | um04807 | -2.10 | 11.11 |
| 26d0006 | -0.48 | 11.76 | um04808 | -0.26 | 11.75 |
| 26d0006 | 0.07  | 11.83 | um04809 | 0.11  | 10.86 |
| 26d0006 | 0.32  | 11.75 | um04811 | 0.12  | 11.95 |
| 26d0007 | 0.28  | 12.53 | um04812 | 0.19  | 12.22 |
| 26d0007 | -0.16 | 11.91 | um04813 | 0.56  | 11.07 |
| 26d0007 | 0.41  | 10.54 | um04815 | -0.21 | 9.80  |
| 26d0007 | 0.19  | 14.23 | um04816 | 0.09  | 11.20 |
| 26d0007 | -0.16 | 12.31 | um04817 | -0.08 | 12.69 |
| 26d0007 | -1.37 | 11.27 | um04818 | 0.00  | 10.87 |
| 26d0007 | 0.31  | 11.26 | um04819 | 0.67  | 11.50 |
| 26d0007 | 0.07  | 10.98 | um04820 | -0.08 | 10.92 |
| 26d0007 | 0.09  | 12.50 | um04826 | -0.16 | 11.09 |
| 26d0007 | -0.15 | 12.48 | um04827 | -0.23 | 12.27 |
| 26d0008 | 0.01  | 9.31  | um04830 | 0.51  | 11.72 |
| 26d0008 | -0.31 | 12.65 | um04831 | 0.06  | 12.14 |
| 26d0008 | -0.41 | 9.41  | um04832 | 0.03  | 12.38 |
| 26d0008 | 0.71  | 13.12 | um04833 | 0.33  | 13.34 |
| 26d0008 | -0.49 | 13.50 | um04834 | 1.05  | 12.26 |
| 26d0008 | -0.64 | 12.04 | um04835 | 0.40  | 10.57 |
| 26d0008 | -0.20 | 12.19 | um04836 | -0.40 | 8.73  |
| 26d0008 | 0.43  | 12.52 | um04838 | -0.19 | 12.19 |
| 26d0008 | 0.28  | 11.45 | um04840 | -0.14 | 12.62 |
| 26d0008 | -0.49 | 11.51 | um04841 | -0.30 | 9.10  |
| 26d0009 | -0.12 | 9.32  | um04844 | -0.20 | 10.95 |
| 26d0009 | 0.30  | 10.76 | um04845 | -0.03 | 12.57 |
| 26d0009 | 0.82  | 13.36 | um04846 | -0.21 | 11.44 |
| 26d0009 | 0.18  | 12.79 | um04847 | 0.79  | 12.12 |
| 26d0009 | 0.55  | 14.92 | um04848 | -0.13 | 12.80 |
| 26d0009 | 0.24  | 11.42 | um04849 | 0.17  | 11.41 |
| 26d0009 | -0.07 | 12.46 | um04850 | 0.37  | 11.28 |
| 26d0009 | -0.20 | 12.77 | um04851 | -0.68 | 11.93 |
| 26d0009 | -0.18 | 8.69  | um04852 | -0.44 | 11.08 |

|         |       |       |         |       |       |
|---------|-------|-------|---------|-------|-------|
| 26d0009 | 0.24  | 11.22 | um04855 | 0.21  | 14.78 |
| 26d0010 | -0.19 | 8.64  | um04856 | -0.08 | 12.88 |
| 26d0010 | 0.26  | 9.94  | um04859 | -0.20 | 12.54 |
| 26d0010 | 0.00  | 9.07  | um04860 | 0.06  | 11.46 |
| 26d0010 | -0.04 | 8.77  | um04863 | 0.75  | 11.35 |
| 26d0010 | 0.23  | 12.43 | um04865 | 0.54  | 12.58 |
| 27c0000 | -0.38 | 12.45 | um04867 | 0.97  | 9.58  |
| 27c0000 | -0.56 | 12.15 | um04869 | 0.07  | 11.33 |
| 27c0000 | -0.49 | 10.94 | um04870 | -0.06 | 10.39 |
| 27c0000 | 0.10  | 9.85  | um04871 | -1.32 | 14.53 |
| 27c0000 | 0.90  | 12.41 | um04872 | -1.04 | 14.20 |
| 27c0000 | -0.19 | 12.25 | um04873 | -1.22 | 12.56 |
| 27c0000 | -0.24 | 11.65 | um04875 | 0.71  | 11.87 |
| 27c0000 | -0.53 | 11.68 | um04876 | 1.01  | 9.84  |
| 27c0000 | 0.11  | 10.58 | um04877 | 0.42  | 9.05  |
| 27c0001 | 0.05  | 12.34 | um04878 | -0.73 | 10.77 |
| 27c0001 | 0.64  | 11.44 | um04880 | -0.22 | 11.01 |
| 27c0001 | -0.77 | 10.78 | um04881 | 0.47  | 11.39 |
| 27c0001 | -0.05 | 13.35 | um04885 | 0.74  | 9.52  |
| 27c0001 | 0.14  | 12.98 | um04886 | -0.20 | 8.71  |
| 27c0001 | 0.09  | 13.16 | um04887 | -0.30 | 13.37 |
| 27c0001 | 0.71  | 12.88 | um04888 | -0.70 | 9.27  |
| 27c0001 | 0.36  | 13.19 | um04889 | 0.00  | 9.35  |
| 27c0001 | -0.05 | 12.12 | um04891 | -0.48 | 8.87  |
| 27c0001 | 0.52  | 14.08 | um04892 | -0.09 | 8.69  |
| 27c0002 | 0.10  | 8.91  | um04893 | -0.17 | 8.58  |
| 27c0002 | -0.52 | 12.76 | um04895 | 0.05  | 11.30 |
| 27c0002 | -0.59 | 11.59 | um04896 | -0.01 | 13.80 |
| 27c0002 | 0.11  | 13.29 | um04897 | 0.07  | 12.37 |
| 27c0002 | -0.66 | 11.08 | um04898 | 0.05  | 12.54 |
| 27c0002 | -0.24 | 11.61 | um04899 | -1.25 | 13.76 |
| 27c0002 | -0.26 | 10.81 | um04900 | 0.01  | 10.71 |
| 27c0002 | -0.38 | 12.08 | um04901 | -0.14 | 11.18 |
| 27c0002 | -0.24 | 13.91 | um04902 | 0.56  | 12.53 |
| 27c0002 | 0.15  | 12.48 | um04905 | 0.06  | 10.69 |
| 27c0003 | -0.48 | 12.71 | um04906 | -0.09 | 11.42 |
| 27c0003 | 0.27  | 14.79 | um04907 | 0.06  | 10.85 |
| 27c0003 | -0.95 | 11.58 | um04908 | -0.01 | 12.80 |
| 27c0003 | -0.18 | 12.13 | um04909 | -0.03 | 12.17 |
| 27c0003 | 0.12  | 8.92  | um04910 | -2.75 | 10.29 |
| 27c0003 | 0.37  | 12.19 | um04911 | -0.09 | 8.57  |
| 27c0003 | 0.80  | 10.21 | um04912 | -1.69 | 12.58 |
| 27c0003 | 0.10  | 11.07 | um04913 | 0.13  | 10.45 |
| 27c0003 | 0.73  | 9.92  | um04914 | -0.48 | 10.28 |
| 27c0003 | 0.10  | 11.11 | um04915 | 0.69  | 10.24 |
| 27c0004 | 0.72  | 10.46 | um04916 | 0.28  | 12.13 |
| 27c0004 | 0.00  | 11.99 | um04918 | 0.38  | 12.38 |
| 27c0004 | -0.50 | 12.54 | um04920 | 0.30  | 11.10 |
| 27c0004 | 0.56  | 15.41 | um04922 | 0.63  | 14.63 |
| 27c0004 | 0.05  | 11.85 | um04923 | 0.35  | 10.92 |
| 27c0004 | -0.26 | 11.10 | um04925 | 0.16  | 11.37 |
| 27c0004 | 0.12  | 12.83 | um04926 | -0.24 | 15.44 |
| 27c0004 | 0.12  | 12.56 | um04927 | -0.03 | 11.47 |
| 27c0004 | 0.17  | 12.54 | um04928 | -0.12 | 9.37  |

|         |       |         |         |       |         |
|---------|-------|---------|---------|-------|---------|
| 27c0004 | -0.05 | 15.49   | um04929 | -0.14 | 8.60    |
| 27c0005 | -0.64 | 11.60   | um04930 | -1.11 | 14.25   |
| 27c0005 | -0.17 | 12.61   | um04931 | 0.04  | 11.78   |
| 27c0005 | -0.13 | 12.46   | um04932 | 0.15  | 12.69   |
| 27c0005 | 0.17  | 12.86   | um04934 | -0.28 | 10.66   |
| 27c0005 | -0.69 | 13.21   | um04936 | 0.10  | 11.30   |
| 27c0005 | -0.90 | 13.22   | um04939 | 0.82  | 13.85   |
| 27c0005 | 0.02  | 9.21    | um04942 | -0.42 | 10.31   |
| 27c0005 | -0.29 | 12.74   | um04943 | -0.13 | 15.68   |
| 27c0005 | 0.18  | 10.90   | um04944 | -0.36 | 11.22   |
| 27c0005 | 0.14  | 10.38   | um04945 | 0.64  | 11.50   |
| 27c0006 | 0.15  | 11.87   | um04947 | 0.29  | 11.28   |
| 27c0006 | 0.25  | 12.42   | um04948 | 0.17  | 14.42   |
| 27c0006 | 0.12  | 8.81    | um04950 | 0.08  | 11.87   |
| 27c0006 | 0.06  | 11.86   | um04951 | 0.13  | 11.47   |
| 27c0006 | 0.01  | 8.98    | um04954 | -0.71 | 10.75   |
| 27c0006 | -0.15 | 12.88   | um04956 | -0.09 | 12.90   |
| 27c0006 | -0.78 | 12.55   | um04958 | -0.34 | 8.65    |
| 27c0006 | -0.16 | 10.74   | um04959 | 0.04  | 13.18   |
| 27c0006 | -0.09 | 12.72   | um04960 | 0.03  | 11.44   |
| 27c0006 | -0.53 | 10.78   | um04961 | -0.67 | 11.01   |
| 27c0007 | -0.32 | 12.39   | um04962 | -0.38 | 11.91   |
| 27c0007 | 0.08  | 9.81    | um04963 | 0.16  | 11.67   |
| 27c0007 | 0.33  | 13.76   | um04964 | -0.49 | 11.94   |
| 27c0007 | 0.15  | 0000001 | um04965 | 0.29  | 6314599 |
| 27c0007 | -0.02 | 10.62   | um04966 | -0.42 | 11.62   |
| 27c0007 | -1.13 | 12.70   | um04967 | -1.28 | 14.75   |
| 27c0007 | 0.07  | 12.32   | um04968 | -0.09 | 8.65    |
| 27c0007 | 0.16  | 12.95   | um04969 | -0.37 | 10.91   |
| 27c0007 | 0.25  | 11.39   | um04970 | -0.10 | 10.95   |
| 27c0007 | 0.26  | 9.92    | um04971 | 4.04  | 13.49   |
| 27c0008 | -0.08 | 9.43    | um04972 | 0.82  | 12.49   |
| 27c0008 | -0.25 | 11.78   | um04974 | 0.82  | 14.89   |
| 27c0008 | 0.13  | 9.56    | um04975 | -0.03 | 10.96   |
| 27c0008 | -0.05 | 12.94   | um04976 | -0.44 | 11.68   |
| 27c0008 | -0.44 | 12.78   | um04977 | 0.66  | 11.76   |
| 27c0008 | 0.59  | 13.64   | um04979 | -0.75 | 11.84   |
| 27c0008 | 0.25  | 15.12   | um04980 | 0.07  | 11.88   |
| 27c0008 | 0.32  | 11.08   | um04982 | 0.99  | 11.29   |
| 27c0008 | 0.57  | 11.48   | um04983 | -0.63 | 1.00    |
| 27c0008 | -0.25 | 11.42   | um04984 | 0.33  | 11.70   |
| 27c0009 | -0.16 | 12.74   | um04985 | 0.05  | 12.27   |
| 27c0009 | 0.15  | 11.28   | um04987 | -0.22 | 15.77   |
| 27c0009 | 0.76  | 10.86   | um04988 | -0.66 | 13.17   |
| 27c0009 | 0.25  | 1"02205 | um04989 | 0.52  | 11.42   |
| 27c0009 | 0.55  | 11.01   | um04990 | 0.05  | 8.77    |
| 27c0009 | -0.66 | 12.46   | um04991 | -0.70 | 12.69   |
| 27c0009 | -0.56 | 11.93   | um04992 | 0.58  | 10.72   |
| 27c0009 | -0.11 | 9.79    | um04993 | 0.28  | 11.71   |
| 27c0009 | -0.12 | 9.72    | um04994 | -0.33 | 13.20   |
| 27d0000 | 0.27  | 13.25   | um04995 | -0.11 | 11.40   |
| 27d0000 | 0.19  | 12.49   | um04997 | 0.54  | 10.92   |
| 27d0000 | -0.25 | 13.63   | um04998 | 0.07  | 9.04    |
| 27d0000 | 0.16  | 9.88    | um04999 | -0.87 | 11.34   |

|         |       |       |          |       |       |
|---------|-------|-------|----------|-------|-------|
| 27d0000 | -4.00 | 11.39 | um05002  | 0.09  | 10.87 |
| 27d0000 | 0.09  | 9.49  | um05004  | 0.23  | 11.45 |
| 27d0000 | 0.55  | 10.32 | um05005  | 0.04  | 11.78 |
| 27d0000 | -0.02 | 10.36 | um05007  | 0.03  | 11.41 |
| 27d0000 | 0.23  | 11.29 | um05009  | -0.12 | 9.23  |
| 27d0001 | 0.26  | 12.16 | um05013  | -0.04 | 11.26 |
| 27d0001 | -1.17 | 12.71 | um05014  | 0.05  | 12.42 |
| 27d0001 | 0.17  | 14.14 | um05015  | 0.15  | 12.71 |
| 27d0001 | 0.14  | 11.27 | um05017  | 0.21  | 11.70 |
| 27d0001 | 0.12  | 12.01 | um05018  | 0.02  | 11.80 |
| 27d0001 | 0.10  | 14.31 | um05019  | -1.74 | 13.24 |
| 27d0001 | -0.35 | 12.61 | 14c00111 | 0.37  | 12.40 |
| 27d0001 | -0.54 | 11.44 | um05023  | 0.62  | 15.23 |
| 27d0001 | -0.38 | 13.40 | um05025  | -0.14 | 11.69 |
| 27d0001 | 0.14  | 11.76 | um05026  | -0.09 | 10.94 |
| 27d0002 | 0.65  | 14.52 | um05027  | -0.50 | 8.60  |
| 27d0002 | 0.14  | 13.21 | um05028  | -0.55 | 10.45 |
| 27d0002 | -1.81 | 13.64 | um05029  | 0.30  | 11.42 |
| 27d0002 | 0.00  | 11.47 | um05030  | -0.19 | 12.84 |
| 27d0002 | 0.32  | 10.32 | um05031  | 0.32  | 15.12 |
| 27d0002 | 0.00  | 9.88  | um05032  | -0.56 | 12.98 |
| 27d0002 | 0.25  | 11.45 | um05033  | -0.38 | 9.98  |
| 27d0002 | 0.07  | 12.61 | um05034  | -0.09 | 9.75  |
| 27d0002 | -1.15 | 11.67 | um05035  | -0.22 | 11.65 |
| 27d0002 | 0.27  | 12.27 | um05036  | -1.91 | 14.79 |
| 27d0003 | -0.09 | 11.75 | um05037  | -0.18 | 11.95 |
| 27d0003 | -0.15 | 11.88 | um05038  | -3.05 | 12.26 |
| 27d0003 | 0.08  | 11.78 | um05039  | 0.00  | 11.50 |
| 27d0003 | 0.44  | 14.28 | um05040  | 0.53  | 14.82 |
| 27d0003 | -0.21 | 14.95 | um05042  | -0.46 | 11.77 |
| 27d0003 | -0.06 | 9.27  | um05044  | 0.41  | 10.38 |
| 27d0003 | 0.15  | 8.75  | um05045  | -0.07 | 11.19 |
| 27d0003 | 0.24  | 13.72 | um05046  | -1.39 | 10.15 |
| 27d0003 | 0.23  | 11.51 | um05050  | 0.43  | 12.04 |
| 27d0003 | 0.37  | 12.15 | um05052  | -0.29 | 9.67  |
| 27d0004 | -0.67 | 12.98 | um05053  | -0.14 | 12.38 |
| 27d0004 | 0.00  | 11.36 | um05054  | -0.04 | 10.74 |
| 27d0004 | -0.06 | 13.28 | um05055  | 0.05  | 10.27 |
| 27d0004 | -0.58 | 11.36 | um05057  | -0.48 | 11.67 |
| 27d0004 | -0.12 | 11.47 | um05058  | -0.82 | 13.82 |
| 27d0004 | -0.17 | 12.87 | um05059  | 0.83  | 13.05 |
| 27d0004 | -1.37 | 12.27 | um05060  | 0.29  | 12.91 |
| 27d0004 | -0.22 | 13.53 | um05061  | -0.17 | 13.21 |
| 27d0004 | 0.42  | 13.02 | um05062  | 0.01  | 13.10 |
| 27d0004 | 0.68  | 13.55 | um05063  | -0.48 | 11.54 |
| 27d0005 | -4.00 | 11.87 | um05064  | 0.05  | 10.96 |
| 27d0005 | 0.07  | 12.91 | um05065  | -0.10 | 12.67 |
| 27d0005 | 0.40  | 12.86 | um05066  | -0.52 | 12.71 |
| 27d0005 | 0.17  | 10.39 | um05068  | -0.17 | 8.48  |
| 27d0005 | 0.02  | 10.06 | um05069  | 0.88  | 9.68  |
| 27d0005 | 0.46  | 14.04 | um05070  | -0.30 | 10.03 |
| 27d0005 | -0.05 | 11.96 | um05072  | 0.97  | 11.05 |
| 27d0005 | -0.21 | 12.85 | um05074  | -2.56 | 12.26 |
| 27d0005 | -0.09 | 12.63 | um05076  | -2.74 | 13.09 |

|         |       |       |         |       |       |
|---------|-------|-------|---------|-------|-------|
| 27d0005 | -0.61 | 13.40 | um05079 | -3.02 | 10.24 |
| 27d0006 | -0.54 | 13.30 | um05080 | -1.07 | 11.36 |
| 27d0006 | 0.27  | 12.46 | um05082 | -0.86 | 12.97 |
| 27d0006 | 0.54  | 11.37 | um05084 | 3.86  | 12.96 |
| 27d0006 | 0.16  | 11.24 | um05085 | 0.14  | 10.49 |
| 27d0006 | -0.61 | 11.02 | um05087 | -0.16 | 12.32 |
| 27d0006 | 0.29  | 13.13 | um05088 | -0.18 | 12.81 |
| 27d0006 | 0.03  | 10.91 | um05089 | 0.58  | 10.99 |
| 27d0006 | -0.20 | 11.55 | um05090 | 0.01  | 15.01 |
| 27d0006 | -0.25 | 11.24 | um05091 | 0.21  | 12.61 |
| 27d0006 | -0.04 | 9.69  | um05094 | -0.44 | 9.29  |
| 27d0007 | 0.11  | 12.47 | um05095 | -0.20 | 8.47  |
| 27d0007 | 0.59  | 11.32 | um05097 | -0.23 | 8.95  |
| 27d0007 | 0.09  | 11.80 | um05100 | -0.48 | 13.31 |
| 27d0007 | -0.37 | 11.61 | um05101 | -0.07 | 11.37 |
| 27d0007 | -0.94 | 9.86  | um05102 | -0.42 | 13.86 |
| 27d0007 | -0.45 | 12.34 | um05103 | -1.25 | 12.92 |
| 27d0007 | 0.05  | 9.88  | um05104 | -0.79 | 15.19 |
| 27d0007 | 0.19  | 10.74 | um05105 | -0.34 | 15.17 |
| 27d0007 | -0.15 | 8.87  | um05107 | -0.01 | 11.12 |
| 27d0007 | -1.02 | 11.78 | um05108 | 0.02  | 12.42 |
| 27d0008 | 0.07  | 11.80 | um05109 | 0.30  | 12.13 |
| um05589 | -0.16 | 13.84 | um05110 | 0.16  | 11.13 |
| 27d0008 | -0.23 | 11.81 | um05111 | -0.39 | 11.47 |
| 27d0008 | -0.20 | 12.13 | um05112 | 0.14  | 11.63 |
| 27d0008 | -0.22 | 14.31 | um05113 | -0.62 | 12.44 |
| 27d0008 | -0.80 | 13.13 | um05114 | -0.97 | 12.10 |
| 27d0008 | -4.00 | 12.22 | um05115 | 0.20  | 12.18 |
| 27d0008 | -0.09 | 12.47 | um05116 | -0.80 | 11.88 |
| 27d0008 | 0.35  | 12.34 | um05117 | -0.24 | 11.42 |
| 27d0008 | -1.73 | 11.24 | um05118 | 0.54  | 11.26 |
| 27d0009 | 0.23  | 12.29 | um05122 | 0.78  | 9.45  |
| 27d0009 | 0.35  | 13.96 | um05124 | -0.02 | 8.57  |
| 27d0009 | -0.52 | 8.95  | um05125 | -0.33 | 12.90 |
| 27d0009 | -1.19 | 10.23 | um05126 | -0.20 | 12.69 |
| 27d0009 | -0.07 | 8.72  | um05127 | 0.24  | 11.28 |
| 27d0009 | 0.50  | 12.03 | um05128 | 0.17  | 11.37 |
| 27d0009 | 0.03  | 9.25  | um05130 | 1.13  | 14.33 |
| 27d0009 | 0.88  | 12.48 | um05131 | 0.70  | 12.26 |
| 27d0009 | -0.14 | 8.97  | um05132 | 1.01  | 11.19 |
| 27d0009 | 0.40  | 10.97 | um05134 | -0.35 | 12.02 |
| 27d0010 | -0.12 | 11.58 | um05136 | 0.22  | 10.92 |
| 27d0010 | -0.71 | 11.54 | um05137 | -0.02 | 14.69 |
| 27d0010 | 0.15  | 10.99 | um05138 | 0.81  | 10.49 |
| 2c00001 | 0.20  | 12.63 | um05139 | 0.31  | 14.84 |
| 2c00002 | 0.41  | 12.55 | um05141 | 0.47  | 11.37 |
| 2c00003 | 1.12  | 13.44 | um05142 | -0.26 | 11.91 |
| 2c00004 | 1.02  | 11.30 | um05143 | -0.39 | 14.55 |
| 2c00005 | -0.04 | 8.44  | um05145 | -0.14 | 11.46 |
| 2c00006 | -0.13 | 8.89  | um05146 | 0.56  | 11.44 |
| 2c00007 | -0.18 | 8.52  | um05148 | 0.40  | 10.37 |
| 2c00008 | 0.44  | 13.80 | um05149 | -0.10 | 11.96 |
| 2c00009 | -0.73 | 14.16 | um05151 | 0.29  | 11.05 |
| 2c00010 | 0.18  | 13.01 | um05152 | -1.60 | 10.51 |

|         |       |       |         |       |       |
|---------|-------|-------|---------|-------|-------|
| 2c00011 | -1.96 | 14.28 | um05153 | -0.87 | 9.26  |
| 2c00012 | 0.25  | 12.94 | um05155 | -0.09 | 8.59  |
| 2c00013 | 0.03  | 12.45 | um05156 | -0.81 | 12.71 |
| 2c00014 | 0.15  | 13.16 | um05158 | 0.07  | 12.56 |
| 2c00015 | 0.11  | 12.33 | um05159 | 0.75  | 10.69 |
| 2c00016 | 0.47  | 14.97 | um05160 | -0.63 | 12.70 |
| 2c00017 | 1.13  | 13.90 | um05161 | -0.40 | 12.48 |
| 2c00018 | -0.62 | 11.41 | um05162 | -0.62 | 12.15 |
| 2c00019 | 0.08  | 8.46  | um05163 | 0.55  | 11.33 |
| 2c00020 | -0.29 | 11.81 | um05166 | -0.04 | 11.26 |
| 2c00021 | 0.03  | 8.74  | um05167 | -0.01 | 12.41 |
| 2c00022 | -4.00 | 13.62 | um05169 | 0.09  | 11.81 |
| 2c00023 | 0.24  | 11.30 | um05170 | 3.15  | 13.73 |
| 2c00024 | -0.15 | 11.87 | um05171 | 0.18  | 12.16 |
| 2c00025 | -0.09 | 10.47 | um05173 | -0.16 | 12.84 |
| 2c00026 | -0.22 | 12.93 | um05174 | 0.00  | 12.64 |
| 2c00027 | 0.25  | 10.84 | um05177 | -0.50 | 11.91 |
| 2c00028 | -0.12 | 12.96 | um05178 | 0.36  | 11.18 |
| 2c00029 | 0.06  | 12.01 | um05179 | -0.41 | 12.77 |
| 2c00030 | 0.05  | 15.10 | um05180 | 0.33  | 11.14 |
| 2c00031 | 0.42  | 14.50 | um05182 | -0.31 | 10.87 |
| 2c00032 | -0.21 | 12.32 | um05183 | 1.03  | 12.45 |
| 2c00033 | -0.05 | 12.47 | um05184 | 0.62  | 11.65 |
| 2c00034 | -0.94 | 12.96 | um05185 | -0.26 | 11.08 |
| 2c00035 | -0.15 | 9.74  | um05186 | 0.50  | 11.20 |
| 2c00036 | -0.27 | 10.67 | um05191 | 0.30  | 11.26 |
| 2c00037 | 0.33  | 13.15 | um05192 | -0.47 | 12.74 |
| 2c00038 | 0.50  | 13.83 | um05194 | -0.24 | 12.28 |
| 2c00039 | 0.58  | 13.54 | um05197 | -0.08 | 12.75 |
| 2c00040 | 0.55  | 14.95 | um05198 | -0.93 | 9.81  |
| 2c00041 | 0.37  | 13.28 | um05199 | -0.29 | 12.04 |
| 2c00042 | -0.21 | 12.12 | um05200 | -0.06 | 11.05 |
| 2c00043 | 0.49  | 11.75 | um05201 | -0.19 | 10.66 |
| 2c00044 | -1.12 | 12.79 | um05202 | 1.04  | 15.02 |
| 2c00045 | 0.46  | 12.72 | um05204 | -0.32 | 13.47 |
| 2c00046 | -0.44 | 12.61 | um05206 | -0.61 | 12.11 |
| 2c00047 | -0.03 | 12.89 | um05207 | -0.27 | 10.29 |
| 2c00048 | -0.16 | 11.75 | um05208 | 0.20  | 10.86 |
| 2c00049 | -0.31 | 11.53 | um05209 | 0.14  | 11.97 |
| 2c00050 | -0.45 | 11.78 | um05210 | 0.31  | 11.05 |
| 2c00051 | 0.11  | 9.69  | um05212 | 0.66  | 12.62 |
| 2c00052 | 0.38  | 12.46 | um05213 | 0.35  | 11.37 |
| 2c00053 | 0.21  | 10.01 | um05214 | 0.01  | 10.90 |
| 2c00054 | 0.06  | 11.32 | um05215 | 0.12  | 10.64 |
| 2c00055 | 0.37  | 12.81 | um05216 | -0.13 | 12.56 |
| 2c00056 | -0.43 | 13.60 | um05217 | -0.27 | 14.36 |
| 2c00057 | -0.14 | 10.12 | um05218 | 0.53  | 12.49 |
| 2c00058 | 0.22  | 10.75 | um05219 | -0.02 | 11.30 |
| 2c00059 | 0.34  | 12.07 | um05222 | 3.34  | 13.27 |
| 2c00060 | 0.16  | 14.49 | um05223 | 0.63  | 10.80 |
| 2c00061 | -4.00 | 12.40 | um05224 | 0.41  | 11.33 |
| 2c00062 | -0.09 | 8.49  | um05225 | 0.42  | 13.56 |
| 2c00063 | -0.63 | 12.76 | um05226 | 3.42  | 13.03 |
| 2c00064 | -0.17 | 12.49 | um05227 | 0.88  | 9.78  |

|         |       |       |         |       |       |
|---------|-------|-------|---------|-------|-------|
| 2c00065 | -0.22 | 12.96 | um05228 | -0.13 | 13.93 |
| 2c00066 | -0.01 | 11.49 | um05229 | 0.01  | 10.70 |
| 2c00067 | -0.59 | 12.99 | um05230 | 1.00  | 11.61 |
| 2c00068 | 0.13  | 12.02 | um05231 | -0.54 | 13.28 |
| 2c00069 | -0.32 | 13.53 | um05232 | 0.09  | 11.50 |
| 2c00070 | 0.24  | 11.68 | um05233 | -0.98 | 12.58 |
| 2c00071 | -0.19 | 11.94 | um05237 | -0.06 | 11.03 |
| 2c00072 | -0.01 | 13.53 | um05238 | -0.11 | 12.34 |
| 2c00073 | 0.04  | 8.76  | um05239 | 0.25  | 11.05 |
| 2c00074 | 0.64  | 11.60 | um05240 | 0.98  | 12.10 |
| 2c00075 | 0.34  | 10.53 | um05241 | 0.73  | 11.99 |
| 2c00076 | -1.10 | 12.50 | um05242 | 0.48  | 9.55  |
| 2c00077 | -0.10 | 10.57 | um05243 | -0.95 | 11.70 |
| 2c00078 | 0.59  | 12.75 | um05247 | -2.74 | 11.21 |
| 2c00079 | 0.14  | 13.72 | um05248 | -1.82 | 11.42 |
| 2c00080 | -0.71 | 12.72 | um05249 | 0.98  | 13.62 |
| 2c00081 | 0.43  | 11.34 | um05252 | -3.23 | 11.85 |
| 2c00082 | 0.03  | 12.29 | um05253 | -3.43 | 11.21 |
| 2c00083 | 0.34  | 12.05 | um05254 | 0.10  | 10.05 |
| 2c00084 | 0.03  | 12.16 | um05255 | -0.35 | 12.82 |
| 2c00085 | 0.37  | 12.09 | um05256 | -0.21 | 9.98  |
| 2c00086 | 0.38  | 11.29 | um05258 | 0.26  | 11.48 |
| 2d00001 | 0.15  | 11.72 | um05259 | -0.02 | 12.59 |
| 2d00002 | 0.45  | 13.22 | um05260 | 0.04  | 12.07 |
| 2d00003 | -0.03 | 12.29 | um05261 | -0.29 | 11.67 |
| 2d00004 | 0.12  | 11.96 | um05262 | -0.08 | 11.28 |
| 2d00005 | 0.09  | 13.34 | um05263 | -0.03 | 10.91 |
| 2d00006 | -0.08 | 8.90  | um05264 | -0.11 | 8.99  |
| 2d00007 | -0.54 | 14.52 | um05265 | -0.25 | 10.05 |
| 2d00008 | 0.52  | 13.41 | um05266 | -4.00 | 12.16 |
| 2d00009 | 0.12  | 12.08 | um05267 | 0.51  | 11.42 |
| 2d00010 | -0.08 | 11.78 | um05268 | -0.23 | 10.94 |
| 2d00011 | 0.45  | 14.43 | um05269 | -0.16 | 11.72 |
| 2d00012 | 0.15  | 12.08 | um05270 | 0.44  | 11.85 |
| 2d00013 | 0.12  | 11.83 | um05271 | 0.36  | 10.94 |
| 2d00014 | 0.88  | 11.59 | um05272 | -0.27 | 12.51 |
| 2d00015 | 0.44  | 12.02 | um05273 | 0.09  | 11.83 |
| 2d00016 | 0.48  | 13.02 | um05274 | 0.53  | 11.73 |
| 2d00017 | -0.03 | 9.12  | um05275 | 0.77  | 12.64 |
| 2d00018 | 0.31  | 12.90 | um05276 | 3.47  | 11.85 |
| 2d00019 | 0.43  | 13.12 | um05278 | -0.13 | 11.30 |
| 2d00020 | -0.39 | 12.31 | um05280 | 0.41  | 11.70 |
| 2d00021 | 1.06  | 15.34 | um05282 | -0.13 | 12.04 |
| 2d00022 | -4.00 | 12.65 | um05283 | 0.13  | 12.54 |
| 2d00023 | 0.34  | 12.87 | um05285 | 0.07  | 11.92 |
| 2d00024 | -0.37 | 10.85 | um05286 | -1.10 | 11.91 |
| 2d00025 | -0.17 | 10.92 | um05287 | -0.22 | 11.85 |
| 2d00026 | 0.00  | 14.67 | um05290 | -0.61 | 11.76 |
| 2d00027 | 0.11  | 12.93 | um05291 | 0.10  | 12.62 |
| 2d00028 | 0.15  | 11.99 | um05292 | 0.24  | 11.67 |
| 2d00029 | 0.10  | 9.56  | um05293 | -0.26 | 12.82 |
| 2d00030 | -0.25 | 13.35 | um05294 | -0.34 | 8.50  |
| 2d00031 | 0.53  | 12.02 | um05295 | -0.15 | 8.44  |
| 2d00032 | 0.10  | 12.55 | um05299 | 0.48  | 9.19  |

|          |       |       |         |       |       |
|----------|-------|-------|---------|-------|-------|
| 2d00033  | 0.07  | 11.84 | um05300 | 0.59  | 9.23  |
| 2d00034  | -1.53 | 11.68 | um05301 | 0.30  | 11.32 |
| 2d00035  | -0.02 | 13.30 | um05302 | -0.29 | 8.61  |
| 2d00036  | -0.23 | 11.76 | um05303 | -0.29 | 8.54  |
| 2d00037  | -0.67 | 13.64 | um05304 | -0.21 | 8.69  |
| 2d00038  | -0.42 | 12.92 | um05305 | -0.09 | 8.58  |
| 2d00039  | 1.39  | 14.46 | um05306 | -0.03 | 8.59  |
| 2d00040  | -0.35 | 10.65 | um05307 | -0.24 | 8.56  |
| 2d00041  | 0.18  | 10.05 | um05308 | -0.30 | 8.48  |
| 2d00042  | 0.50  | 13.54 | um05309 | 0.07  | 8.82  |
| 2d00043  | 0.39  | 11.63 | um05310 | -0.05 | 8.57  |
| 2d00044  | -0.08 | 10.13 | um05311 | -0.06 | 10.34 |
| 2d00045  | 0.28  | 10.72 | um05312 | -0.08 | 8.58  |
| 2d00046  | 0.32  | 12.52 | um05313 | -0.18 | 8.42  |
| 2d00047  | 0.23  | 12.98 | um05314 | -0.31 | 8.87  |
| 2d00048  | -0.44 | 13.45 | um05315 | -0.21 | 8.79  |
| 2d00049  | -0.07 | 12.37 | um05316 | -0.41 | 8.82  |
| 2d00050  | -0.14 | 9.04  | um05317 | -0.14 | 8.56  |
| 2d00051  | -0.09 | 12.24 | um05318 | 1.64  | 12.86 |
| 2d00052  | -0.16 | 10.81 | um05319 | -0.37 | 12.66 |
| 2d00053  | 0.06  | 11.91 | um05320 | 0.42  | 12.81 |
| 2d00054  | -0.11 | 12.23 | um05321 | 0.86  | 9.74  |
| 2d00055  | 0.12  | 8.88  | um05322 | 0.58  | 11.45 |
| 2d00056  | -0.28 | 12.19 | um05323 | -0.12 | 12.29 |
| 2d00057  | -0.05 | 8.94  | um05324 | 0.17  | 10.27 |
| 2d00058  | -0.17 | 12.04 | um05325 | -0.48 | 10.71 |
| 2d00059  | -0.20 | 13.22 | um05326 | 0.30  | 12.78 |
| 2d00060  | 0.18  | 11.01 | um05327 | 0.53  | 11.68 |
| 2d00061  | 0.06  | 10.67 | um05328 | -0.12 | 12.11 |
| 2d00062  | -0.51 | 12.07 | um05329 | -0.10 | 11.33 |
| 2d00063  | 0.15  | 10.89 | um05330 | -1.55 | 15.14 |
| 2d00064  | 0.04  | 12.11 | um05331 | -0.23 | 12.33 |
| 2d00065  | -0.21 | 11.39 | um05332 | -0.76 | 9.16  |
| 2d00066  | -0.66 | 12.91 | um05333 | 0.40  | 10.32 |
| 2d00067  | -0.07 | 12.47 | um05334 | 1.09  | 12.72 |
| 2d00068  | -0.39 | 12.90 | um05335 | 0.63  | 11.54 |
| 2d00069  | -0.95 | 13.34 | um05336 | 1.24  | 13.68 |
| 2d00070  | -0.04 | 12.80 | um05337 | -0.95 | 11.95 |
| 2d00071  | -1.32 | 11.52 | um05338 | -0.04 | 11.54 |
| 2d00072  | 0.05  | 9.18  | um05339 | -0.44 | 10.46 |
| 2d00073  | -0.01 | 11.12 | um05340 | -0.15 | 8.64  |
| 2d00074  | 0.24  | 11.25 | um05341 | -0.34 | 12.79 |
| 2d00075  | 0.50  | 13.05 | um05342 | 0.04  | 11.71 |
| 313c0000 | 0.09  | 8.50  | um05343 | 0.52  | 11.36 |
| 3c00001  | 0.86  | 14.95 | um05344 | 0.35  | 11.70 |
| 3c00002  | 0.08  | 9.99  | um05345 | -0.88 | 11.70 |
| 3c00003  | -0.08 | 11.57 | um05346 | -0.19 | 8.91  |
| 3c00004  | -0.13 | 15.78 | um05347 | -0.94 | 12.55 |
| 3c00005  | -0.11 | 11.13 | um05348 | -0.48 | 10.46 |
| 3c00006  | 0.14  | 12.93 | um05349 | 0.25  | 9.61  |
| 3c00007  | -0.03 | 12.36 | um05350 | -1.11 | 14.56 |
| 3c00008  | 1.13  | 15.12 | um05351 | 0.09  | 11.93 |
| 3c00009  | -0.15 | 12.32 | um05352 | 0.21  | 10.49 |
| 3c00010  | -0.36 | 12.02 | um05353 | 0.52  | 13.04 |



|         |       |       |         |       |       |
|---------|-------|-------|---------|-------|-------|
| 3c00011 | 0.62  | 13.23 | um05366 | -0.52 | 15.84 |
| 3c00012 | 0.66  | 10.17 | um05368 | 0.19  | 11.33 |
| 3c00013 | 0.70  | 12.39 | um05370 | 2.03  | 12.23 |
| 3c00014 | 0.36  | 12.36 | um05371 | -0.26 | 12.14 |
| 3c00015 | 0.06  | 9.11  | um05373 | 0.28  | 12.65 |
| 3c00016 | 0.68  | 14.29 | um05376 | -0.10 | 11.70 |
| 3c00017 | 0.31  | 11.13 | um05377 | 0.01  | 10.79 |
| 3c00018 | -0.77 | 15.25 | um05378 | 0.10  | 12.39 |
| 3c00019 | -0.45 | 14.22 | um05380 | -0.12 | 11.84 |
| 3c00020 | 0.06  | 13.06 | um05381 | -0.69 | 10.97 |
| 3c00021 | 0.00  | 13.77 | um05382 | -0.36 | 12.23 |
| 3c00022 | 0.09  | 14.63 | um05383 | 0.05  | 12.59 |
| 3c00023 | -4.00 | 11.94 | um05384 | 0.02  | 9.40  |
| 3c00024 | 0.62  | 12.59 | um05385 | 0.82  | 11.55 |
| 3c00025 | -0.31 | 12.25 | um05386 | 0.33  | 12.18 |
| 3c00026 | 0.08  | 13.28 | um05387 | 0.54  | 11.36 |
| 3c00027 | -0.01 | 15.87 | um05389 | -0.11 | 8.97  |
| 3c00028 | 0.41  | 13.40 | um05390 | 0.90  | 12.40 |
| 3c00029 | 0.02  | 9.32  | um05391 | -0.36 | 13.96 |
| 3c00030 | -0.03 | 15.95 | um05392 | -0.21 | 10.48 |
| 3c00031 | 0.00  | 15.07 | um05393 | 0.59  | 11.18 |
| 3c00032 | 0.23  | 13.79 | um05394 | -0.21 | 8.42  |
| 3c00033 | -0.80 | 12.96 | um05395 | 0.03  | 11.70 |
| 3c00034 | 0.51  | 13.57 | um05396 | 1.54  | 11.18 |
| 3c00035 | -0.03 | 8.75  | um05397 | -0.05 | 10.16 |
| 3c00036 | -0.21 | 8.50  | um05398 | -0.57 | 12.59 |
| 3c00037 | 0.37  | 12.81 | um05399 | 0.61  | 10.62 |
| 3c00038 | 0.35  | 14.00 | um05401 | -0.59 | 12.44 |
| 3c00039 | -0.60 | 12.44 | um05402 | -0.91 | 12.27 |
| 3c00040 | -0.08 | 13.11 | um05403 | -0.82 | 12.59 |
| 3c00041 | -0.78 | 15.11 | um05404 | -0.04 | 11.36 |
| 3c00042 | -0.38 | 13.88 | um05405 | 0.09  | 13.52 |
| 3c00043 | -0.52 | 12.78 | um05406 | 0.14  | 11.44 |
| 3c00044 | 0.12  | 13.19 | um05407 | -0.15 | 11.97 |
| 3c00045 | 0.22  | 13.31 | um05408 | 0.05  | 12.02 |
| 3c00046 | 0.01  | 14.27 | um05410 | 0.78  | 12.06 |
| 3c00047 | -0.62 | 12.94 | um05411 | -4.00 | 12.11 |
| 3c00048 | -0.08 | 11.09 | um05412 | -0.46 | 11.42 |
| 3c00049 | -0.42 | 14.25 | um05414 | -1.61 | 11.89 |
| 3c00050 | -0.11 | 12.75 | um05415 | -0.40 | 11.50 |
| 3c00051 | 0.93  | 12.63 | um05416 | -0.08 | 10.58 |
| 3c00052 | 0.08  | 9.64  | um05417 | -0.09 | 12.01 |
| 3c00053 | -0.07 | 11.86 | um05420 | -0.69 | 12.62 |
| 3c00054 | 0.01  | 13.35 | um05421 | -2.98 | 12.18 |
| 3c00055 | 0.32  | 10.38 | um05422 | -2.40 | 11.13 |
| 3c00056 | 0.45  | 13.59 | um05423 | -0.58 | 12.53 |
| 3c00057 | -0.95 | 12.56 | um05424 | 0.09  | 8.90  |
| 3c00058 | -0.01 | 12.89 | um05426 | -0.65 | 9.26  |
| 3c00059 | -0.26 | 13.34 | um05427 | -0.26 | 8.69  |
| 3c00060 | 0.24  | 11.28 | um05428 | -0.11 | 12.06 |
| 3c00061 | 0.44  | 12.67 | um05429 | 0.92  | 11.49 |
| 3c00062 | -0.18 | 11.84 | um05431 | -1.04 | 14.03 |
| 3c00063 | -0.90 | 11.98 | um05432 | 0.15  | 10.83 |
| 3c00064 | 0.09  | 11.76 | um05433 | -0.38 | 13.01 |

|         |       |       |         |       |       |
|---------|-------|-------|---------|-------|-------|
| 3c00065 | 0.09  | 12.75 | um05434 | -0.09 | 11.77 |
| 3c00066 | -0.02 | 12.95 | um05435 | 0.20  | 12.10 |
| 3c00067 | 0.42  | 12.79 | um05436 | -0.43 | 8.76  |
| 3c00068 | 0.57  | 14.81 | um05437 | -0.28 | 12.88 |
| 3c00069 | -0.46 | 15.63 | um05438 | -0.02 | 10.63 |
| 3c00070 | -0.43 | 12.71 | um05439 | 0.32  | 11.71 |
| 3c00071 | 0.16  | 11.55 | um05442 | -0.87 | 10.32 |
| 3c00072 | -0.20 | 14.08 | um05443 | -0.29 | 10.34 |
| 3c00073 | -0.10 | 11.13 | um05444 | 0.15  | 9.53  |
| 3c00074 | 0.29  | 11.53 | um05445 | 0.89  | 11.94 |
| 3c00075 | 0.90  | 12.22 | um05446 | 0.20  | 13.48 |
| 3c00076 | 0.10  | 13.29 | um05447 | 0.52  | 12.35 |
| 3c00077 | 0.61  | 12.18 | um05449 | 0.44  | 11.93 |
| 3c00078 | -0.25 | 13.69 | um05450 | 1.01  | 13.77 |
| 3c00079 | -0.67 | 12.01 | um05452 | 0.72  | 10.50 |
| 3c00080 | 0.00  | 15.96 | um05453 | 0.35  | 12.40 |
| 3d00001 | 0.71  | 13.14 | um05454 | 0.23  | 12.37 |
| 3d00002 | 0.44  | 10.46 | um05456 | 0.34  | 14.02 |
| 3d00003 | 0.98  | 12.15 | um05458 | -0.20 | 11.66 |
| 3d00004 | -0.26 | 11.89 | um05459 | 0.46  | 10.64 |
| 3d00005 | 1.47  | 11.57 | um05462 | -0.22 | 8.81  |
| 3d00006 | -0.21 | 10.21 | um05465 | 0.40  | 14.26 |
| 3d00007 | 0.36  | 14.03 | um05466 | 0.25  | 11.79 |
| 3d00008 | -0.06 | 12.66 | um05467 | -0.03 | 8.80  |
| 3d00009 | 0.06  | 10.23 | um05470 | -0.31 | 12.47 |
| 3d00010 | -0.08 | 13.54 | um05471 | 0.23  | 11.32 |
| 3d00011 | -0.23 | 11.59 | um05472 | 0.10  | 14.64 |
| 3d00012 | 0.01  | 8.82  | um05473 | -0.45 | 12.28 |
| 3d00013 | 0.20  | 13.29 | um05475 | 0.39  | 12.68 |
| 3d00014 | -0.44 | 13.88 | um05478 | 0.04  | 11.67 |
| 3d00015 | -0.20 | 12.99 | um05480 | -0.49 | 13.05 |
| 3d00016 | 0.89  | 15.29 | um05481 | -4.00 | 12.20 |
| 3d00017 | -0.67 | 13.18 | um05482 | 0.13  | 14.00 |
| 3d00018 | 0.74  | 11.88 | um05485 | 0.38  | 11.93 |
| 3d00019 | 0.08  | 11.74 | um05486 | -1.25 | 9.88  |
| 3d00020 | -0.29 | 13.67 | um05489 | -0.26 | 11.68 |
| 3d00021 | 0.02  | 15.89 | um05490 | -0.53 | 12.17 |
| 3d00022 | 0.11  | 11.55 | um05493 | -2.49 | 10.99 |
| 3d00023 | 0.32  | 15.32 | um05494 | -0.24 | 12.29 |
| 3d00024 | 0.51  | 14.02 | um05495 | -2.26 | 10.38 |
| 3d00025 | 0.20  | 14.01 | um05496 | -0.54 | 13.19 |
| 3d00026 | -0.68 | 13.61 | um05498 | 0.17  | 13.24 |
| 3d00027 | -0.37 | 12.75 | um05499 | 0.10  | 12.78 |
| 3d00028 | -0.15 | 11.85 | um05501 | 0.01  | 12.16 |
| 3d00029 | 0.55  | 12.29 | um05502 | 0.12  | 11.92 |
| 3d00030 | -0.40 | 12.35 | um05503 | -0.41 | 13.69 |
| 3d00031 | 0.37  | 12.78 | um05504 | -0.54 | 10.98 |
| 3d00032 | 0.38  | 14.44 | um05505 | -0.15 | 11.83 |
| 3d00033 | 0.03  | 10.88 | um05506 | -0.08 | 11.87 |
| 3d00034 | -0.15 | 11.95 | um05507 | 1.87  | 11.76 |
| 3d00035 | 0.05  | 13.26 | um05509 | -1.87 | 12.53 |
| 3d00036 | 0.71  | 13.81 | um05511 | -0.14 | 14.56 |
| 3d00037 | -0.31 | 11.53 | um05512 | 0.37  | 10.64 |
| 3d00038 | 0.02  | 9.07  | um05514 | -1.44 | 13.16 |

|         |       |       |         |       |       |
|---------|-------|-------|---------|-------|-------|
| 3d00039 | -0.07 | 13.40 | um05515 | 0.18  | 12.27 |
| 3d00040 | 0.43  | 15.47 | um05517 | -0.14 | 8.57  |
| 3d00041 | 0.12  | 13.60 | um05518 | 0.18  | 12.46 |
| 3d00042 | -0.43 | 14.53 | um05520 | -0.44 | 11.55 |
| 3d00043 | 0.59  | 14.19 | um05521 | 1.33  | 13.92 |
| 3d00044 | 0.14  | 11.99 | um05522 | 0.85  | 12.48 |
| 3d00045 | -0.06 | 11.31 | um05525 | -0.23 | 12.07 |
| 3d00046 | 0.00  | 13.95 | um05526 | -0.32 | 11.96 |
| 3d00047 | 0.67  | 15.50 | um05527 | -0.23 | 12.07 |
| 3d00048 | 0.14  | 11.46 | um05528 | -2.70 | 9.87  |
| 3d00049 | 0.51  | 11.73 | um05531 | -0.48 | 11.99 |
| 3d00050 | -0.96 | 13.75 | um05533 | -0.29 | 12.29 |
| 3d00051 | 0.30  | 11.27 | um05537 | 0.11  | 11.59 |
| 3d00052 | -0.43 | 15.25 | um05538 | 0.15  | 11.70 |
| 3d00053 | -0.01 | 11.89 | um05539 | 0.18  | 10.47 |
| 3d00054 | -0.60 | 13.51 | um05540 | -0.13 | 12.30 |
| 3d00055 | -4.00 | 12.19 | um05541 | -0.57 | 10.78 |
| 3d00056 | -0.23 | 14.08 | um05542 | 0.05  | 11.06 |
| 3d00057 | 0.33  | 13.65 | um05543 | -0.64 | 11.38 |
| 3d00058 | 0.19  | 15.85 | um05544 | 0.17  | 13.46 |
| 3d00059 | -0.26 | 13.94 | um05545 | 0.55  | 11.89 |
| 3d00060 | 0.23  | 12.57 | um05546 | -0.34 | 11.24 |
| 3d00061 | -0.29 | 13.80 | um05547 | -0.15 | 10.68 |
| 3d00062 | -0.11 | 13.84 | um05548 | -0.24 | 8.87  |
| 3d00063 | 0.05  | 9.13  | um05549 | -1.17 | 14.12 |
| 3d00064 | 0.01  | 12.56 | um05550 | -1.81 | 11.98 |
| 3d00065 | 0.33  | 12.77 | um05552 | -0.03 | 11.31 |
| 3d00066 | 0.02  | 11.65 | um05554 | 0.46  | 11.92 |
| 3d00067 | -0.33 | 9.51  | um05555 | 0.29  | 12.76 |
| 3d00068 | -0.13 | 12.59 | um05557 | 0.10  | 11.29 |
| 3d00069 | -0.42 | 10.38 | um05558 | 0.97  | 13.05 |
| 3d00070 | 0.19  | 13.00 | um05559 | 0.68  | 12.87 |
| 3d00071 | 0.19  | 14.16 | um05560 | -0.31 | 11.71 |
| 3d00072 | -0.20 | 13.36 | um05562 | -0.34 | 8.88  |
| 3d00073 | -4.00 | 8.62  | um05563 | -0.10 | 12.28 |
| 3d00074 | -0.11 | 14.67 | um05564 | 0.28  | 12.78 |
| 3d00075 | 0.33  | 13.77 | um05567 | 0.19  | 14.60 |
| 3d00076 | -1.55 | 14.60 | um05568 | 0.02  | 11.70 |
| 3d00077 | -0.44 | 13.59 | um05569 | -0.09 | 10.38 |
| 3d00078 | -0.09 | 8.59  | um05570 | -0.71 | 11.74 |
| 3d00079 | 0.12  | 11.96 | um05571 | 0.27  | 12.30 |
| 3d00080 | -0.36 | 13.16 | um05572 | -0.25 | 11.22 |
| 3d00081 | 0.22  | 10.84 | um05573 | 0.39  | 9.92  |
| 3d00082 | 0.24  | 11.40 | um05574 | 0.86  | 12.00 |
| 3d00083 | 0.44  | 13.27 | um05575 | 0.04  | 12.09 |
| 3d00084 | -0.47 | 13.97 | um05577 | -0.18 | 11.45 |
| 3d00085 | 0.72  | 14.25 | um05579 | -0.07 | 13.04 |
| 3d00086 | -1.66 | 13.44 | um05580 | -0.16 | 13.24 |
| 3d00087 | -0.40 | 12.62 | um05581 | -2.38 | 14.51 |
| 3d00088 | 0.06  | 10.41 | um05583 | -0.04 | 13.81 |
| 3d00089 | 0.23  | 9.63  | um05584 | -0.37 | 14.76 |
| 3d00090 | 0.07  | 12.75 | um05586 | 2.65  | 12.81 |
| 3d00091 | 0.12  | 13.23 | um05588 | 0.30  | 10.91 |
| 3d00092 | 0.15  | 15.73 | um05589 | 0.15  | 11.10 |

|         |       |       |         |       |       |
|---------|-------|-------|---------|-------|-------|
| 3d00093 | -0.15 | 14.31 | um05590 | 0.49  | 10.83 |
| 3d00094 | 0.12  | 10.12 | um05591 | 1.23  | 10.05 |
| 3d00095 | 0.91  | 12.89 | um05592 | 0.69  | 11.37 |
| 3d00096 | 0.12  | 9.79  | um05593 | 1.03  | 11.08 |
| 3d00097 | 0.08  | 13.83 | um05594 | -0.10 | 14.53 |
| 3d00098 | 0.32  | 12.82 | um05595 | 3.45  | 11.91 |
| 3d00099 | -0.01 | 13.10 | um05596 | 0.47  | 10.73 |
| 3d00100 | 0.32  | 13.76 | um05597 | -0.01 | 13.43 |
| 3d00101 | -0.88 | 11.56 | um05600 | -0.27 | 10.41 |
| 3d00102 | 0.10  | 15.11 | um05601 | -0.25 | 10.09 |
| 482d000 | -0.04 | 15.00 | um05602 | 0.48  | 10.50 |
| 48c0000 | -0.20 | 10.97 | um05603 | -0.14 | 10.17 |
| 4c00001 | -0.25 | 11.02 | um05604 | -0.80 | 14.75 |
| 4c00002 | -0.16 | 11.62 | um05605 | 0.15  | 11.33 |
| 4c00003 | 0.20  | 10.31 | um05606 | -0.49 | 11.78 |
| 4c00004 | 0.01  | 10.61 | um05607 | -0.34 | 11.90 |
| 4c00005 | 0.12  | 9.62  | um05608 | 0.56  | 11.44 |
| 4c00006 | -0.30 | 13.45 | um05609 | 0.19  | 11.79 |
| 4c00007 | -0.15 | 10.89 | um05610 | -0.28 | 13.35 |
| 4c00008 | -0.68 | 11.87 | um05612 | 0.57  | 11.13 |
| 4c00009 | 0.15  | 12.29 | um05614 | 0.23  | 9.82  |
| 4c00010 | 0.38  | 13.92 | um05617 | 2.31  | 12.44 |
| 4c00011 | -0.32 | 12.56 | um05619 | 0.49  | 11.97 |
| 4c00012 | 0.32  | 12.63 | um05621 | -0.10 | 10.60 |
| 4c00013 | 0.14  | 10.75 | um05624 | 0.50  | 11.10 |
| 4c00014 | -0.23 | 12.41 | um05625 | -0.11 | 13.98 |
| 4c00015 | -0.32 | 12.15 | um05626 | -0.21 | 11.50 |
| 4c00016 | 0.09  | 11.74 | um05627 | -0.40 | 12.37 |
| 4c00017 | -0.09 | 9.56  | um05628 | 0.56  | 11.51 |
| 4c00018 | 0.25  | 9.23  | um05629 | 0.26  | 11.08 |
| 4c00019 | 0.00  | 13.84 | um05631 | -0.62 | 10.03 |
| 4c00020 | 0.26  | 13.26 | um05632 | 0.83  | 14.57 |
| 4c00021 | -0.23 | 12.00 | um05633 | -0.38 | 9.33  |
| 4c00022 | 0.44  | 12.33 | um05635 | -0.37 | 10.44 |
| 4c00023 | -0.18 | 11.96 | um05636 | 0.44  | 11.73 |
| 4c00024 | 0.08  | 11.83 | um05640 | -0.42 | 12.91 |
| 4c00025 | 0.25  | 13.11 | um05641 | -0.26 | 12.35 |
| 4c00026 | 0.17  | 12.81 | um05642 | 0.14  | 11.66 |
| 4c00027 | 0.32  | 10.80 | um05644 | 0.58  | 13.84 |
| 4c00028 | -1.38 | 14.41 | um05645 | -0.02 | 12.58 |
| 4c00029 | 0.47  | 12.77 | um05646 | -0.15 | 11.88 |
| 4c00030 | 0.21  | 11.13 | um05647 | -0.29 | 10.98 |
| 4c00031 | -0.12 | 11.57 | um05648 | -0.03 | 10.31 |
| 4c00032 | -0.47 | 11.59 | um05649 | -0.24 | 11.21 |
| 4c00033 | 0.19  | 12.57 | um05651 | 0.20  | 11.04 |
| 4c00034 | -0.09 | 8.99  | um05652 | -0.59 | 13.98 |
| 4c00035 | 1.87  | 13.91 | um05653 | 0.04  | 10.79 |
| 4c00036 | 0.65  | 14.20 | um05654 | 0.33  | 12.59 |
| 4c00037 | -0.17 | 12.47 | um05656 | 0.13  | 12.58 |
| 4c00038 | 0.13  | 13.03 | um05658 | 0.79  | 11.26 |
| 4c00039 | 0.39  | 11.50 | um05659 | -0.06 | 11.24 |
| 4c00040 | -0.10 | 12.66 | um05660 | -0.21 | 10.47 |
| 4c00041 | -1.57 | 14.26 | um05662 | -0.13 | 14.76 |
| 4c00042 | 0.36  | 13.11 | um05663 | 0.88  | 14.51 |

|         |       |       |         |       |       |
|---------|-------|-------|---------|-------|-------|
| 4c00043 | -0.13 | 8.96  | um05664 | 1.38  | 11.94 |
| 4d00001 | 0.66  | 11.18 | um05665 | -0.45 | 13.00 |
| 4d00002 | 0.04  | 12.24 | um05671 | -1.28 | 12.54 |
| 4d00003 | -0.37 | 10.63 | um05674 | -0.09 | 12.77 |
| 4d00004 | 0.17  | 11.63 | um05675 | 0.35  | 12.32 |
| 4d00005 | -0.02 | 11.74 | um05676 | -1.15 | 11.53 |
| 4d00006 | -0.25 | 12.95 | um05677 | -0.72 | 13.73 |
| 4d00007 | -4.00 | 8.75  | um05678 | 0.84  | 12.90 |
| 4d00008 | -0.16 | 11.66 | um05679 | 0.26  | 11.50 |
| 4d00009 | -0.01 | 12.79 | um05680 | 0.14  | 12.59 |
| 4d00010 | -0.01 | 13.51 | um05683 | -0.14 | 10.88 |
| 4d00011 | 0.52  | 13.58 | um05684 | 0.26  | 12.11 |
| 4d00012 | -0.10 | 11.35 | um05686 | 0.86  | 14.14 |
| 4d00013 | 0.50  | 13.99 | um05687 | -0.73 | 12.95 |
| 4d00014 | 0.56  | 10.72 | um05688 | -0.39 | 12.13 |
| 4d00015 | 1.45  | 11.58 | um05689 | -2.50 | 13.43 |
| 4d00016 | 0.32  | 13.94 | um05690 | 1.23  | 13.59 |
| 4d00017 | -0.60 | 11.92 | um05691 | 0.86  | 9.73  |
| 4d00018 | -0.34 | 12.11 | um05692 | -0.70 | 11.16 |
| 4d00019 | -0.07 | 12.75 | um05693 | -0.23 | 14.54 |
| 4d00020 | -0.03 | 13.09 | um05694 | 0.49  | 9.30  |
| 4d00021 | -0.06 | 11.59 | um05695 | -0.07 | 12.66 |
| 4d00022 | -0.27 | 11.94 | um05698 | 0.24  | 12.44 |
| 4d00023 | 0.37  | 12.89 | um05700 | 0.28  | 10.99 |
| 4d00024 | 0.11  | 12.01 | um05702 | -0.12 | 11.91 |
| 4d00025 | 0.06  | 12.42 | um05703 | -0.23 | 11.37 |
| 4d00026 | -0.09 | 8.97  | um05704 | 0.50  | 11.32 |
| 4d00027 | -0.07 | 12.35 | um05705 | 1.27  | 13.67 |
| 4d00028 | -0.03 | 8.73  | um05706 | -0.08 | 11.60 |
| 4d00029 | -0.26 | 14.91 | um05707 | -0.17 | 8.85  |
| 4d00030 | -0.24 | 13.56 | um05708 | -0.46 | 15.91 |
| 4d00031 | 0.24  | 11.12 | um05709 | 0.01  | 12.48 |
| 4d00032 | -0.19 | 12.98 | um05714 | -0.32 | 11.57 |
| 4d00033 | -0.03 | 12.47 | um05715 | 0.39  | 11.90 |
| 4d00034 | -0.02 | 9.70  | um05718 | -1.00 | 12.43 |
| 4d00035 | 0.31  | 11.54 | um05719 | -0.08 | 12.05 |
| 4d00036 | 0.19  | 8.61  | um05720 | 0.15  | 11.70 |
| 4d00037 | -0.05 | 8.82  | um05721 | 0.07  | 11.25 |
| 4d00038 | -0.14 | 12.32 | um05722 | 0.11  | 11.29 |
| 4d00039 | 2.35  | 12.93 | um05724 | -0.34 | 10.13 |
| 4d00040 | -0.38 | 13.48 | um05725 | -0.20 | 12.79 |
| 4d00041 | 0.66  | 11.58 | um05726 | 0.18  | 10.84 |
| 4d00042 | 0.96  | 14.71 | um05728 | 0.59  | 13.35 |
| 4d00043 | -0.16 | 13.16 | um05729 | 0.92  | 11.65 |
| 4d00044 | 0.18  | 10.54 | um05731 | 0.58  | 13.76 |
| 4d00045 | -0.38 | 13.96 | um05732 | -0.30 | 11.53 |
| 529c000 | 0.01  | 15.95 | um05733 | 0.50  | 12.85 |
| 536c000 | 0.11  | 8.61  | um05734 | -0.18 | 14.89 |
| 5c00001 | -0.30 | 11.39 | um05736 | 0.10  | 12.07 |
| 5c00002 | -0.39 | 12.73 | um05737 | -0.06 | 11.44 |
| 5c00003 | -0.77 | 11.29 | um05739 | 0.23  | 11.49 |
| 5c00004 | -1.01 | 14.42 | um05740 | -0.40 | 11.79 |
| 5c00005 | 0.47  | 11.78 | um05741 | -0.07 | 12.99 |
| 5c00006 | 0.37  | 10.49 | um05742 | -4.00 | 13.58 |

|         |       |       |         |       |       |
|---------|-------|-------|---------|-------|-------|
| 5c00007 | 0.43  | 10.17 | um05745 | -0.32 | 11.94 |
| 5c00008 | 0.00  | 15.80 | um05746 | 0.63  | 11.99 |
| 5c00009 | 0.22  | 12.67 | um05747 | -0.33 | 12.46 |
| 5c00010 | -0.11 | 10.38 | um05748 | -0.29 | 13.21 |
| 5c00011 | 0.19  | 13.11 | um05749 | -0.26 | 10.34 |
| 5c00012 | 0.39  | 11.67 | um05750 | 0.11  | 10.56 |
| 5c00013 | -0.09 | 8.67  | um05751 | 1.69  | 11.98 |
| 5c00014 | -0.37 | 11.86 | um05753 | 0.18  | 10.79 |
| 5c00015 | -0.16 | 9.21  | um05754 | 0.23  | 13.91 |
| 5c00016 | -0.10 | 15.91 | um05755 | 0.59  | 10.50 |
| 5c00017 | -0.41 | 15.23 | um05756 | -0.57 | 10.72 |
| 5c00018 | 0.53  | 11.77 | um05758 | 0.12  | 11.21 |
| 5c00019 | 0.19  | 9.35  | um05760 | -0.26 | 9.61  |
| 5c00020 | 0.52  | 12.66 | um05761 | 0.03  | 13.60 |
| 5c00021 | -1.26 | 10.96 | um05764 | -0.67 | 9.26  |
| 5c00022 | 0.10  | 9.01  | um05766 | -1.47 | 14.15 |
| 5c00023 | 0.33  | 13.18 | um05767 | 0.14  | 11.69 |
| 5c00024 | 0.08  | 10.58 | um05769 | -0.25 | 13.23 |
| 5c00025 | 0.16  | 12.52 | um05770 | -0.34 | 10.48 |
| 5c00026 | -0.49 | 13.60 | um05771 | 0.33  | 12.30 |
| 5c00027 | 0.29  | 12.25 | um05772 | 0.15  | 9.04  |
| 5c00028 | -0.51 | 12.48 | um05773 | 0.29  | 11.32 |
| 5c00029 | -0.31 | 13.59 | um05774 | 0.01  | 10.50 |
| 5c00030 | -0.74 | 12.84 | um05776 | 0.57  | 13.20 |
| 5c00031 | 0.33  | 13.63 | um05777 | -0.36 | 11.04 |
| 5c00032 | -4.00 | 12.77 | um05780 | -0.08 | 9.19  |
| 5c00033 | -0.02 | 11.74 | um05781 | -0.29 | 8.81  |
| 5c00034 | 0.49  | 13.54 | um05782 | 0.07  | 10.56 |
| 5c00035 | 0.73  | 13.20 | um05783 | -0.36 | 8.75  |
| 5c00036 | -4.00 | 12.83 | um05785 | -0.70 | 9.07  |
| 5c00037 | -0.15 | 10.77 | um05786 | -1.40 | 9.48  |
| 5c00038 | 0.68  | 13.42 | um05787 | -0.61 | 10.15 |
| 5c00039 | -0.13 | 12.54 | um05789 | 0.03  | 12.55 |
| 5c00040 | -0.75 | 11.59 | um05790 | 0.87  | 11.19 |
| 5c00041 | 0.32  | 12.84 | um05791 | 4.08  | 13.10 |
| 5c00042 | -0.34 | 13.01 | um05792 | 0.79  | 9.86  |
| 5c00043 | -0.18 | 13.89 | um05794 | 0.49  | 10.35 |
| 5c00044 | 0.47  | 15.01 | um05795 | 0.70  | 11.07 |
| 5c00045 | 0.06  | 9.39  | um05796 | -0.32 | 8.40  |
| 5c00046 | 0.88  | 14.15 | um05798 | -0.57 | 8.83  |
| 5c00047 | 1.00  | 15.40 | um05799 | -0.43 | 9.26  |
| 5c00048 | -0.08 | 9.71  | um05800 | 0.07  | 11.73 |
| 5c00049 | -0.12 | 11.59 | um05801 | -0.10 | 10.62 |
| 5c00050 | -0.02 | 12.28 | um05802 | 1.23  | 10.05 |
| 5c00051 | 0.25  | 12.65 | um05803 | 0.11  | 9.69  |
| 5c00052 | 0.34  | 12.44 | um05804 | -0.09 | 9.89  |
| 5c00053 | 0.25  | 8.88  | um05805 | 1.23  | 11.79 |
| 5c00054 | -0.01 | 9.12  | um05806 | -0.37 | 9.89  |
| 5c00055 | 0.31  | 13.44 | um05807 | 0.54  | 9.27  |
| 5c00056 | -0.45 | 12.50 | um05809 | -0.27 | 8.98  |
| 5c00057 | -0.63 | 11.49 | um05811 | -1.71 | 12.12 |
| 5c00058 | 0.18  | 9.89  | um05812 | 3.76  | 11.85 |
| 5c00059 | -0.19 | 14.17 | um05814 | 0.13  | 9.28  |
| 5c00060 | 0.74  | 12.09 | um05818 | -0.62 | 12.43 |

|         |       |       |         |       |       |
|---------|-------|-------|---------|-------|-------|
| 5c00061 | -0.53 | 12.33 | um05819 | 0.07  | 8.54  |
| 5c00062 | -0.45 | 14.02 | um05820 | 0.33  | 12.68 |
| 5c00063 | -0.17 | 8.69  | um05821 | 0.02  | 10.92 |
| 5c00064 | 0.19  | 13.02 | um05822 | 0.51  | 10.36 |
| 5c00065 | -0.12 | 12.59 | um05824 | -0.14 | 8.87  |
| 5c00066 | -0.16 | 12.71 | um05825 | -0.41 | 13.56 |
| 5c00067 | 0.00  | 12.63 | um05827 | -0.03 | 12.27 |
| 5c00068 | 0.03  | 9.87  | um05828 | -0.29 | 15.60 |
| 5c00069 | -0.29 | 12.05 | um05829 | -0.34 | 11.65 |
| 5c00070 | 0.13  | 11.08 | um05830 | 0.26  | 9.92  |
| 5c00071 | -1.02 | 14.62 | um05831 | -0.62 | 13.39 |
| 5c00072 | 0.07  | 13.35 | um05832 | -0.40 | 12.41 |
| 5c00073 | -1.12 | 11.92 | um05833 | 0.10  | 11.61 |
| 5c00074 | 0.91  | 14.86 | um05834 | 0.02  | 10.89 |
| 5c00075 | -0.18 | 12.76 | um05835 | -0.66 | 11.23 |
| 5c00076 | 0.21  | 10.21 | um05836 | -0.02 | 12.17 |
| 5c00077 | 0.11  | 12.49 | um05839 | -0.21 | 11.18 |
| 5c00078 | 0.28  | 12.75 | um05840 | 0.71  | 11.15 |
| 5c00079 | -0.18 | 12.41 | um05841 | -0.13 | 12.23 |
| 5c00080 | -0.09 | 12.05 | um05842 | 0.38  | 10.91 |
| 5c00081 | 0.40  | 12.61 | um05844 | 0.57  | 12.39 |
| 5c00082 | 0.15  | 11.77 | um05845 | -0.36 | 11.98 |
| 5c00083 | -0.27 | 12.83 | um05846 | 0.12  | 12.03 |
| 5c00084 | -0.49 | 12.38 | um05847 | 0.08  | 12.37 |
| 5c00085 | 0.22  | 11.99 | um05848 | -0.15 | 11.73 |
| 5c00086 | -0.41 | 9.59  | um05849 | 0.13  | 11.09 |
| 5c00087 | 0.38  | 12.12 | um05850 | 0.36  | 12.85 |
| 5c00088 | 0.73  | 11.42 | um05852 | 0.54  | 10.85 |
| 5c00089 | 0.19  | 14.51 | um05853 | 0.38  | 11.04 |
| 5c00090 | -0.14 | 11.41 | um05854 | -0.15 | 11.54 |
| 5c00091 | 0.10  | 9.99  | um05856 | 0.44  | 12.17 |
| 5c00092 | -0.04 | 10.59 | um05857 | -0.32 | 10.55 |
| 5c00093 | 0.07  | 8.62  | um05858 | 0.06  | 11.11 |
| 5c00094 | -0.44 | 11.17 | um05860 | -0.46 | 12.90 |
| 5c00095 | 0.28  | 12.54 | um05861 | -0.51 | 9.37  |
| 5c00096 | -0.08 | 10.13 | um05862 | -0.14 | 10.46 |
| 5c00097 | 0.39  | 12.27 | um05863 | 0.09  | 13.65 |
| 5c00098 | 0.34  | 12.17 | um05869 | -0.19 | 13.06 |
| 5c00099 | -0.02 | 9.87  | um05870 | -0.08 | 12.35 |
| 5c00100 | 0.37  | 13.80 | um05872 | -0.03 | 11.49 |
| 5c00101 | 0.28  | 12.63 | um05873 | 0.03  | 12.03 |
| 5c00102 | 0.08  | 9.13  | um05876 | -0.17 | 11.29 |
| 5c00103 | 0.33  | 12.39 | um05878 | 1.17  | 13.18 |
| 5c00104 | -0.65 | 12.32 | um05879 | -0.38 | 12.39 |
| 5c00105 | 0.76  | 12.91 | um05880 | -1.25 | 13.96 |
| 5c00106 | 0.09  | 11.76 | um05883 | 0.31  | 14.79 |
| 5c00107 | 0.29  | 13.05 | um05888 | 0.14  | 11.30 |
| 5c00108 | 0.13  | 9.45  | um05889 | -0.77 | 15.82 |
| 5c00109 | 0.15  | 12.48 | um05890 | -0.26 | 11.69 |
| 5c00110 | 0.39  | 13.09 | um05891 | 0.52  | 11.68 |
| 5c00111 | 0.01  | 8.72  | um05892 | 0.62  | 11.21 |
| 5c00112 | 0.05  | 8.63  | um05893 | -0.42 | 13.01 |
| 5c00113 | 0.02  | 12.45 | um05894 | 0.50  | 10.10 |
| 5c00114 | 0.00  | 9.59  | um05895 | 0.13  | 10.19 |

|         |       |       |         |       |       |
|---------|-------|-------|---------|-------|-------|
| 5c00115 | 0.58  | 12.25 | um05896 | 0.13  | 11.55 |
| 5c00116 | -0.20 | 11.72 | um05897 | -0.57 | 12.51 |
| 5c00117 | 0.36  | 11.15 | um05898 | 0.28  | 12.61 |
| 5c00118 | -0.14 | 10.51 | um05899 | 0.33  | 10.94 |
| 5c00119 | 0.01  | 8.86  | um05900 | -0.65 | 11.84 |
| 5c00120 | 0.01  | 15.83 | um05901 | -0.08 | 11.20 |
| 5c00121 | -0.06 | 10.35 | um05906 | 0.08  | 13.71 |
| 5c00122 | -0.72 | 14.01 | um05907 | 0.24  | 12.14 |
| 5c00123 | -0.06 | 15.72 | um05908 | -0.60 | 12.33 |
| 5c00124 | -0.20 | 13.47 | um05910 | 0.25  | 12.29 |
| 5c00125 | 0.36  | 12.20 | um05911 | -0.46 | 10.26 |
| 5c00126 | -0.01 | 12.43 | um05912 | -0.19 | 10.51 |
| 5c00127 | -0.11 | 11.11 | um05915 | 0.48  | 11.46 |
| 5c00128 | 0.00  | 13.47 | um05916 | -0.10 | 11.42 |
| 5c00129 | -0.18 | 12.18 | um05917 | 0.25  | 10.15 |
| 5c00130 | -0.12 | 11.39 | um05919 | -0.27 | 12.48 |
| 5c00131 | -0.54 | 12.36 | um05921 | 0.35  | 11.46 |
| 5c00132 | 0.93  | 13.67 | um05922 | 0.19  | 11.54 |
| 5c00133 | -0.59 | 11.80 | um05923 | 1.01  | 11.52 |
| 5c00134 | -0.02 | 12.36 | um05924 | -0.01 | 12.28 |
| 5c00135 | -0.24 | 11.49 | um05925 | 0.74  | 10.91 |
| 5c00136 | -0.62 | 11.89 | um05926 | -0.24 | 8.86  |
| 5c00137 | -0.44 | 10.99 | um05927 | 0.02  | 8.79  |
| 5c00138 | -0.34 | 12.90 | um05928 | -0.18 | 8.83  |
| 5c00139 | 0.32  | 11.82 | um05929 | -0.26 | 8.49  |
| 5c00140 | 0.19  | 12.13 | um05930 | -0.15 | 8.45  |
| 5c00141 | -0.64 | 11.27 | um05931 | -0.06 | 8.50  |
| 5c00142 | -0.04 | 9.65  | um05932 | -0.02 | 9.44  |
| 5c00143 | -0.01 | 8.59  | um05933 | -0.97 | 11.62 |
| 5c00144 | 0.01  | 8.79  | um05934 | 0.14  | 11.90 |
| 5c00145 | -0.15 | 8.57  | um05936 | 1.07  | 12.34 |
| 5c00146 | 0.00  | 8.78  | um05937 | -0.13 | 11.07 |
| 5c00147 | 0.14  | 11.41 | um05938 | 1.98  | 10.90 |
| 5c00148 | -0.17 | 11.97 | um05939 | 0.43  | 11.03 |
| 5c00149 | -0.36 | 9.23  | um05940 | 0.30  | 12.79 |
| 5c00150 | 0.60  | 13.53 | um05942 | 0.75  | 10.48 |
| 5c00151 | -0.30 | 11.41 | um05944 | 1.27  | 11.84 |
| 5c00152 | 0.37  | 12.31 | um05946 | 0.41  | 9.71  |
| 5c00153 | -0.17 | 11.54 | um05947 | -0.15 | 12.59 |
| 5c00154 | 0.74  | 12.44 | um05948 | 0.19  | 8.96  |
| 5c00155 | -0.75 | 10.97 | um05949 | -0.39 | 13.16 |
| 5c00156 | 0.22  | 10.67 | um05951 | -1.15 | 10.01 |
| 5c00157 | 0.15  | 12.46 | um05952 | 1.29  | 13.21 |
| 5c00158 | 0.20  | 10.13 | um05953 | 1.39  | 13.67 |
| 5c00159 | -0.90 | 10.21 | um05954 | -0.09 | 11.87 |
| 5c00160 | 0.06  | 14.05 | um05958 | 1.58  | 11.06 |
| 5c00161 | 0.00  | 9.20  | um05959 | 0.37  | 10.00 |
| 5c00162 | -0.03 | 8.68  | um05960 | 0.61  | 12.00 |
| 5c00163 | -0.95 | 12.14 | um05961 | -0.95 | 11.97 |
| 5c00164 | -0.22 | 14.16 | um05964 | 0.05  | 8.84  |
| 5c00165 | 0.00  | 13.07 | um05965 | -0.36 | 13.83 |
| 5d00001 | -0.31 | 12.00 | um05966 | 1.24  | 12.72 |
| 5d00002 | 0.23  | 15.64 | um05967 | 2.38  | 11.36 |
| 5d00003 | 0.13  | 13.33 | um05968 | -0.23 | 9.91  |



|         |       |       |         |       |       |
|---------|-------|-------|---------|-------|-------|
| 5d00004 | 0.14  | 13.71 | um05970 | -0.89 | 12.62 |
| 5d00005 | -0.37 | 10.80 | um05971 | -0.64 | 14.71 |
| 5d00006 | 0.19  | 12.79 | um05972 | 1.75  | 11.39 |
| 5d00007 | -0.22 | 14.65 | um05974 | 0.02  | 14.63 |
| 5d00008 | -0.45 | 13.75 | um05976 | 0.62  | 9.75  |
| 5d00009 | 0.14  | 12.74 | um05977 | 0.76  | 12.52 |
| 5d00010 | -0.08 | 8.45  | um05978 | 0.06  | 12.43 |
| 5d00011 | 0.06  | 8.61  | um05979 | -0.47 | 15.88 |
| 5d00012 | 0.43  | 13.44 | um05981 | -0.14 | 10.03 |
| 5d00013 | 0.16  | 9.88  | um05982 | 1.19  | 11.72 |
| 5d00014 | -0.09 | 12.18 | um05983 | 1.24  | 11.64 |
| 5d00015 | -0.58 | 14.68 | um05984 | 1.10  | 13.10 |
| 5d00016 | 0.41  | 10.58 | um05985 | 0.97  | 12.17 |
| 5d00017 | -0.18 | 12.34 | um05986 | -0.37 | 13.26 |
| 5d00018 | -0.08 | 13.09 | um05987 | 0.11  | 13.00 |
| 5d00019 | 0.04  | 10.02 | um05988 | 0.86  | 11.44 |
| 5d00020 | 0.20  | 10.96 | um05989 | 0.10  | 12.09 |
| 5d00021 | -0.03 | 8.97  | um05991 | 0.28  | 11.43 |
| 5d00022 | -0.60 | 13.53 | um05992 | -0.51 | 13.22 |
| 5d00023 | 0.12  | 8.52  | um05994 | -0.09 | 10.67 |
| 5d00024 | 0.90  | 12.11 | um05995 | 0.33  | 11.03 |
| 5d00025 | -0.23 | 12.45 | um05997 | -1.13 | 11.13 |
| 5d00026 | -4.65 | 12.97 | um05998 | 0.38  | 14.55 |
| 5d00027 | -0.26 | 9.85  | um05999 | 0.46  | 12.38 |
| 5d00028 | -0.04 | 9.45  | um06000 | 0.39  | 11.58 |
| 5d00029 | 0.33  | 13.17 | um06001 | -0.17 | 12.73 |
| 5d00030 | -0.09 | 12.68 | um06002 | 0.68  | 11.40 |
| 5d00031 | 0.13  | 13.49 | um06003 | -0.28 | 13.41 |
| 5d00032 | -0.09 | 8.73  | um06004 | 0.58  | 14.04 |
| 5d00033 | -0.33 | 12.04 | um06008 | 0.32  | 13.35 |
| 5d00034 | 0.03  | 14.27 | um06009 | -0.39 | 11.63 |
| 5d00035 | 1.61  | 10.77 | um06010 | 1.28  | 13.55 |
| 5d00036 | 0.37  | 12.10 | um06012 | 2.48  | 10.43 |
| 5d00037 | -0.19 | 13.06 | um06013 | -0.55 | 11.12 |
| 5d00038 | -0.38 | 12.77 | um06014 | -0.03 | 12.46 |
| 5d00039 | -0.06 | 12.90 | um06018 | -0.58 | 12.50 |
| 5d00040 | 0.01  | 11.50 | um06019 | 0.34  | 12.68 |
| 5d00041 | 0.43  | 12.06 | um06020 | 0.52  | 13.00 |
| 5d00042 | -0.27 | 13.22 | um06022 | -0.50 | 13.38 |
| 5d00043 | -0.09 | 9.42  | um06027 | -0.55 | 12.25 |
| 5d00044 | 0.14  | 10.89 | um06029 | -0.34 | 11.62 |
| 5d00045 | 0.61  | 13.27 | um06031 | 0.49  | 12.23 |
| 5d00046 | 0.06  | 9.19  | um06032 | -0.06 | 12.81 |
| 5d00047 | 0.11  | 13.09 | um06033 | 0.72  | 12.18 |
| 5d00048 | 0.22  | 12.41 | um06034 | -0.40 | 12.93 |
| 5d00049 | 0.39  | 13.02 | um06035 | -0.02 | 12.65 |
| 5d00050 | -0.01 | 13.17 | um06036 | 0.26  | 10.78 |
| 5d00051 | -0.06 | 9.86  | um06037 | 0.44  | 11.12 |
| 5d00052 | -0.58 | 13.71 | um06038 | -0.44 | 12.09 |
| 5d00053 | 0.40  | 11.67 | um06040 | 0.67  | 13.02 |
| 5d00054 | 0.77  | 12.64 | um06042 | -4.30 | 11.18 |
| 5d00055 | 0.32  | 11.74 | um06043 | -0.15 | 11.05 |
| 5d00056 | -0.08 | 10.59 | um06045 | -0.27 | 12.62 |
| 5d00057 | 0.03  | 12.11 | um06046 | 0.28  | 11.65 |

|         |       |       |         |       |       |
|---------|-------|-------|---------|-------|-------|
| 5d00058 | -0.19 | 11.35 | um06047 | -0.61 | 12.05 |
| 5d00059 | -0.93 | 13.96 | um06048 | -0.86 | 12.26 |
| 5d00060 | -0.12 | 11.03 | um06049 | 0.11  | 12.61 |
| 5d00061 | -0.34 | 10.52 | um06050 | -0.06 | 11.09 |
| 5d00062 | 0.34  | 12.74 | um06051 | 0.13  | 13.46 |
| 5d00063 | 0.71  | 14.03 | um06052 | -0.28 | 11.17 |
| 5d00064 | -0.23 | 13.45 | um06053 | 0.22  | 14.78 |
| 5d00065 | -0.24 | 12.65 | um06054 | -1.06 | 10.70 |
| 5d00066 | -0.24 | 11.70 | um06055 | -0.09 | 12.19 |
| 5d00067 | 0.29  | 13.24 | um06056 | 1.39  | 11.85 |
| 5d00068 | -0.15 | 12.53 | um06060 | -0.16 | 12.80 |
| 5d00069 | -0.07 | 12.14 | um06061 | 0.37  | 11.32 |
| 5d00070 | -0.62 | 11.90 | um06062 | 0.03  | 12.01 |
| 5d00071 | 0.20  | 12.42 | um06063 | 0.83  | 13.50 |
| 5d00072 | 0.36  | 12.37 | um06064 | 1.61  | 13.84 |
| 5d00073 | -0.40 | 13.38 | um06065 | -0.02 | 11.63 |
| 5d00074 | -0.22 | 11.76 | um06066 | 0.16  | 11.81 |
| 5d00075 | -0.60 | 13.29 | um06067 | -0.24 | 12.99 |
| 5d00076 | 0.30  | 12.67 | um06068 | 0.01  | 12.91 |
| 5d00077 | -0.35 | 12.95 | um06069 | 0.44  | 11.92 |
| 5d00078 | -0.80 | 12.44 | um06070 | -0.73 | 15.31 |
| 5d00079 | 0.43  | 12.17 | um06071 | 0.14  | 10.18 |
| 5d00080 | -0.01 | 10.66 | um06072 | -0.81 | 11.65 |
| 5d00081 | 0.19  | 12.49 | um06073 | 0.88  | 10.02 |
| 5d00082 | -0.07 | 15.93 | um06075 | 0.14  | 9.06  |
| 5d00083 | 0.28  | 11.42 | um06076 | -0.69 | 9.61  |
| 5d00084 | 0.59  | 10.97 | um06077 | -0.77 | 9.91  |
| 5d00085 | 0.13  | 14.00 | um06078 | -1.63 | 12.92 |
| 5d00086 | 0.41  | 12.34 | um06079 | 0.65  | 9.87  |
| 5d00087 | 0.30  | 12.86 | um06080 | -0.11 | 12.05 |
| 5d00088 | 0.27  | 13.55 | um06082 | 0.71  | 13.77 |
| 5d00089 | 0.10  | 12.63 | um06083 | -0.04 | 12.36 |
| 5d00090 | -0.53 | 12.84 | um06084 | 3.60  | 13.70 |
| 5d00091 | 0.60  | 15.26 | um06085 | 4.09  | 13.32 |
| 5d00092 | 0.64  | 12.05 | um06086 | 0.20  | 12.72 |
| 5d00093 | 0.32  | 10.21 | um06087 | -0.17 | 11.39 |
| 5d00094 | -0.01 | 8.63  | um06088 | -0.44 | 11.86 |
| 5d00095 | 0.12  | 12.76 | um06089 | 0.06  | 12.37 |
| 5d00096 | 0.77  | 13.25 | um06090 | 0.07  | 11.88 |
| 5d00097 | 0.24  | 11.31 | um06091 | 0.86  | 9.97  |
| 5d00098 | -0.02 | 13.02 | um06092 | 0.98  | 11.18 |
| 5d00099 | -0.02 | 13.96 | um06093 | -0.13 | 11.58 |
| 5d00100 | -0.26 | 10.97 | um06097 | 0.58  | 11.77 |
| 5d00101 | 0.06  | 11.74 | um06098 | -1.41 | 13.88 |
| 5d00102 | -0.10 | 12.43 | um06102 | 0.15  | 14.53 |
| 5d00103 | -0.48 | 13.23 | um06103 | 0.66  | 12.37 |
| 5d00104 | -0.12 | 9.68  | um06105 | -0.87 | 14.04 |
| 5d00105 | 0.49  | 12.36 | um06107 | 0.31  | 12.44 |
| 5d00106 | 0.42  | 13.00 | um06111 | -0.58 | 13.84 |
| 5d00107 | 0.10  | 8.93  | um06112 | -0.45 | 8.52  |
| 5d00108 | 0.12  | 10.96 | um06113 | -0.20 | 8.66  |
| 5d00109 | 0.05  | 12.67 | um06116 | 0.05  | 13.53 |
| 5d00110 | 0.01  | 13.58 | um06117 | -0.15 | 12.77 |
| 5d00111 | 0.02  | 9.73  | um06118 | -0.18 | 10.95 |

|         |       |       |         |       |       |
|---------|-------|-------|---------|-------|-------|
| 5d00112 | 0.05  | 11.89 | um06119 | -0.73 | 9.49  |
| 5d00113 | 0.11  | 13.29 | um06120 | 1.51  | 10.54 |
| 5d00114 | 0.09  | 12.12 | um06121 | -0.72 | 12.33 |
| 5d00115 | 0.28  | 12.79 | um06122 | 0.85  | 9.17  |
| 5d00116 | 0.15  | 11.58 | um06123 | -1.78 | 13.52 |
| 5d00117 | -0.04 | 9.20  | um06124 | -0.21 | 9.20  |
| 5d00118 | 0.85  | 10.50 | um06125 | -0.15 | 8.48  |
| 5d00119 | 0.13  | 9.31  | um06126 | -0.43 | 9.77  |
| 5d00120 | -0.53 | 13.51 | um06127 | 0.49  | 11.54 |
| 5d00121 | -0.15 | 13.39 | um06128 | 0.71  | 11.49 |
| 5d00122 | 1.04  | 12.95 | um06129 | -0.31 | 10.34 |
| 5d00123 | 0.07  | 12.21 | um06130 | -2.23 | 10.23 |
| 5d00124 | 0.33  | 14.18 | um06131 | -0.07 | 11.73 |
| 5d00125 | -0.33 | 12.65 | um06132 | -0.14 | 13.34 |
| 5d00126 | 0.33  | 12.84 | um06133 | 0.89  | 14.70 |
| 5d00127 | -0.06 | 10.75 | um06134 | -0.65 | 12.59 |
| 5d00128 | -0.06 | 11.57 | um06135 | 0.23  | 11.90 |
| 5d00129 | -0.23 | 12.87 | um06136 | 0.17  | 11.06 |
| 5d00130 | 0.05  | 12.23 | um06137 | -0.08 | 11.24 |
| 5d00131 | -0.81 | 9.69  | um06138 | -3.12 | 14.78 |
| 5d00132 | -1.02 | 12.40 | um06139 | -0.08 | 11.68 |
| 5d00133 | -0.31 | 11.61 | um06140 | 0.60  | 11.73 |
| 5d00134 | -0.14 | 9.62  | um06141 | -0.03 | 12.58 |
| 5d00135 | -0.85 | 14.19 | um06142 | 0.01  | 10.84 |
| 5d00136 | -0.25 | 12.26 | um06143 | 0.28  | 10.86 |
| 5d00137 | 0.50  | 13.44 | um06144 | 0.29  | 11.22 |
| 5d00138 | 0.40  | 11.47 | um06145 | -0.39 | 11.02 |
| 5d00139 | 0.06  | 10.56 | um06146 | 0.67  | 13.21 |
| 5d00140 | -0.05 | 8.60  | um06147 | 0.06  | 11.94 |
| 5d00141 | -0.23 | 10.92 | um06148 | -0.02 | 12.75 |
| 5d00142 | -0.29 | 11.99 | um06149 | -0.21 | 14.79 |
| 5d00143 | 0.09  | 11.35 | um06150 | 0.78  | 12.48 |
| 5d00144 | 0.14  | 9.62  | um06151 | 0.10  | 11.34 |
| 5d00145 | -0.02 | 10.98 | um06152 | -0.47 | 9.30  |
| 5d00146 | -0.40 | 11.01 | um06153 | -0.77 | 13.14 |
| 5d00147 | 0.32  | 13.17 | um06154 | -0.32 | 10.98 |
| 5d00148 | 0.10  | 9.58  | um06155 | 0.22  | 11.22 |
| 6c00001 | -0.06 | 15.91 | um06156 | -0.51 | 11.02 |
| 6c00002 | -0.30 | 15.19 | um06157 | -0.17 | 13.69 |
| 6c00003 | -0.05 | 11.60 | um06158 | -0.22 | 8.77  |
| 6c00004 | 0.07  | 10.17 | um06159 | -0.21 | 8.64  |
| 6c00005 | -0.63 | 9.63  | um06160 | -0.16 | 8.71  |
| 6c00006 | -0.05 | 13.76 | um06161 | -0.27 | 8.79  |
| 6c00007 | -0.23 | 10.42 | um06162 | -0.52 | 14.51 |
| 6c00008 | -2.09 | 10.33 | um06163 | 0.18  | 11.17 |
| 6c00009 | -0.23 | 10.09 | um06164 | -0.20 | 11.14 |
| 6c00010 | 0.01  | 8.96  | um06165 | 0.62  | 14.19 |
| 6c00011 | -0.05 | 12.81 | um06166 | 0.77  | 12.66 |
| 6c00012 | -0.12 | 9.67  | um06167 | -0.03 | 11.34 |
| 6c00013 | 0.37  | 11.44 | um06168 | -0.46 | 13.35 |
| 6c00014 | 0.03  | 10.29 | um06169 | 0.09  | 11.55 |
| 6c00015 | -0.92 | 12.31 | um06170 | -1.76 | 9.73  |
| 6c00016 | -1.35 | 12.26 | um06171 | 0.02  | 10.29 |
| 6c00017 | 0.28  | 9.35  | um06172 | -0.15 | 11.51 |

|         |       |       |         |       |       |
|---------|-------|-------|---------|-------|-------|
| 6c00018 | 0.30  | 11.78 | um06194 | 0.53  | 12.61 |
| 6c00019 | 0.00  | 13.10 | um06195 | -0.21 | 11.45 |
| 6c00020 | -0.45 | 14.92 | um06197 | 0.14  | 11.10 |
| 6c00021 | 0.26  | 11.89 | um06200 | -0.08 | 11.63 |
| 6c00022 | 0.66  | 9.94  | um06201 | -0.14 | 11.80 |
| 6c00023 | 0.23  | 13.76 | um06203 | 1.84  | 12.19 |
| 6c00024 | 0.44  | 12.50 | um06204 | -0.09 | 8.82  |
| 6c00025 | -0.04 | 12.77 | um06205 | -0.53 | 10.70 |
| 6c00026 | -0.27 | 12.73 | um06206 | 0.25  | 11.32 |
| 6c00027 | 0.18  | 12.68 | um06210 | 0.14  | 11.94 |
| 6c00028 | 0.06  | 8.64  | um06211 | -0.10 | 11.47 |
| 6c00029 | 0.13  | 8.78  | um06212 | -0.20 | 12.58 |
| 6c00030 | 0.18  | 11.05 | um06213 | -0.41 | 11.34 |
| 6c00031 | -0.36 | 11.05 | um06215 | -0.18 | 10.88 |
| 6c00032 | -0.69 | 12.91 | um06218 | -0.53 | 14.79 |
| 6c00033 | -0.37 | 12.83 | um06219 | 0.54  | 12.01 |
| 6c00034 | 0.50  | 12.08 | um06221 | -0.09 | 8.86  |
| 6c00035 | 0.11  | 11.90 | um06222 | 0.02  | 8.72  |
| 6c00036 | -0.51 | 12.85 | um06223 | -0.36 | 8.71  |
| 6c00037 | 0.10  | 14.91 | um06224 | -0.46 | 11.73 |
| 6c00038 | 0.16  | 13.46 | um06226 | 0.02  | 12.87 |
| 6c00039 | 0.02  | 12.70 | um06228 | 0.16  | 10.60 |
| 6c00040 | -0.66 | 13.81 | um06229 | -0.07 | 10.72 |
| 6c00041 | 0.05  | 13.08 | um06231 | 1.18  | 14.09 |
| 6c00042 | 1.44  | 14.67 | um06233 | 0.08  | 12.60 |
| 6c00043 | -0.61 | 14.13 | um06234 | -0.25 | 13.61 |
| 6c00044 | -0.10 | 9.01  | um06235 | -0.15 | 13.22 |
| 6c00045 | -0.10 | 13.38 | um06236 | 0.22  | 12.16 |
| 6c00046 | -0.01 | 8.46  | um06237 | 0.25  | 11.59 |
| 6c00047 | 0.02  | 10.81 | um06239 | 0.28  | 11.34 |
| 6c00048 | -0.09 | 11.49 | um06241 | 0.04  | 12.66 |
| 6c00049 | -0.36 | 10.35 | um06243 | 0.10  | 10.55 |
| 6c00050 | -0.57 | 12.00 | um06248 | -0.11 | 8.79  |
| 6c00051 | -0.26 | 9.92  | um06249 | -0.09 | 12.37 |
| 6c00052 | 0.65  | 14.46 | um06251 | -0.28 | 12.57 |
| 6c00053 | -0.92 | 12.77 | um06253 | 0.10  | 9.45  |
| 6c00054 | 0.10  | 12.43 | um06255 | -0.24 | 8.55  |
| 6c00055 | -0.04 | 9.73  | um06256 | 0.22  | 10.53 |
| 6c00056 | -0.91 | 13.15 | um06257 | -0.02 | 10.94 |
| 6c00057 | 0.01  | 8.87  | um06258 | 0.49  | 12.36 |
| 6c00058 | -0.20 | 10.90 | um06259 | -0.44 | 11.95 |
| 6c00059 | 0.71  | 10.82 | um06260 | 0.18  | 10.81 |
| 6c00060 | -0.04 | 14.57 | um06261 | -0.34 | 11.22 |
| 6c00061 | 0.43  | 11.84 | um06265 | 0.18  | 9.90  |
| 6c00062 | -0.38 | 12.87 | um06266 | -1.15 | 13.25 |
| 6c00063 | -0.33 | 14.06 | um06267 | 0.06  | 8.86  |
| 6c00064 | -0.66 | 12.63 | um06268 | 0.62  | 12.33 |
| 6c00065 | 0.03  | 11.41 | um06269 | -0.37 | 12.02 |
| 6c00066 | -0.05 | 12.07 | um06270 | 0.06  | 10.86 |
| 6c00067 | -0.01 | 11.85 | um06271 | -0.19 | 10.95 |
| 6c00068 | -0.23 | 11.29 | um06273 | -0.57 | 12.60 |
| 6c00069 | 0.85  | 13.91 | um06274 | -0.89 | 12.28 |
| 6c00070 | -0.03 | 12.48 | um06275 | 0.37  | 12.63 |
| 6c00071 | 0.22  | 15.43 | um06276 | 0.44  | 12.52 |

|         |       |       |         |       |       |
|---------|-------|-------|---------|-------|-------|
| 6c00072 | 0.04  | 10.68 | um06278 | 1.00  | 11.94 |
| 6c00073 | -0.04 | 12.85 | um06279 | -0.25 | 9.18  |
| 6c00074 | -0.15 | 10.84 | um06280 | -0.13 | 11.37 |
| 6c00075 | -0.10 | 12.54 | um06281 | 0.22  | 13.77 |
| 6c00076 | 0.55  | 13.69 | um06282 | 0.28  | 12.24 |
| 6c00077 | 0.21  | 11.68 | um06283 | -0.70 | 13.33 |
| 6c00078 | -0.66 | 13.23 | um06284 | 0.10  | 11.39 |
| 6c00079 | -1.46 | 13.53 | um06285 | -0.30 | 12.61 |
| 6c00080 | -0.29 | 12.78 | um06286 | -0.13 | 8.60  |
| 6c00081 | -0.01 | 9.65  | um06287 | 0.09  | 12.41 |
| 6c00082 | 0.11  | 12.42 | um06288 | 0.41  | 9.61  |
| 6c00083 | 0.43  | 12.61 | um06289 | -0.03 | 11.85 |
| 6c00084 | -1.04 | 11.19 | um06290 | 0.18  | 11.02 |
| 6c00085 | 0.08  | 12.40 | um06291 | 0.17  | 11.41 |
| 6c00086 | 0.60  | 14.06 | um06292 | 0.51  | 12.13 |
| 6c00087 | 0.33  | 11.48 | um06293 | -0.32 | 9.89  |
| 6c00088 | -0.21 | 10.78 | um06294 | -0.39 | 12.63 |
| 6c00089 | -0.86 | 12.81 | um06295 | 0.06  | 12.02 |
| 6c00090 | -1.17 | 12.97 | um06296 | 0.12  | 10.99 |
| 6c00091 | 0.75  | 12.98 | um06297 | -0.08 | 11.99 |
| 6c00092 | -0.94 | 11.46 | um06298 | 0.14  | 11.75 |
| 6c00093 | -0.39 | 12.45 | um06299 | -0.29 | 11.81 |
| 6c00094 | -1.42 | 12.17 | um06300 | -0.46 | 12.61 |
| 6c00095 | 0.14  | 11.34 | um06301 | 0.14  | 9.67  |
| 6c00096 | -0.51 | 13.78 | um06302 | -0.16 | 11.02 |
| 6c00097 | -0.14 | 15.74 | um06303 | 0.35  | 11.54 |
| 6c00098 | -0.26 | 12.30 | um06304 | -0.11 | 12.51 |
| 6c00099 | 0.21  | 10.72 | um06305 | -0.37 | 14.58 |
| 6c00100 | 0.14  | 11.98 | um06306 | 0.39  | 9.71  |
| 6c00101 | 0.03  | 12.34 | um06307 | -0.20 | 12.63 |
| 6c00102 | -0.11 | 12.26 | um06308 | 2.25  | 12.41 |
| 6c00103 | -0.24 | 12.07 | um06309 | -0.67 | 11.94 |
| 6c00104 | -0.13 | 10.73 | um06310 | 0.16  | 12.01 |
| 6c00105 | -0.22 | 12.16 | um06311 | 0.63  | 12.65 |
| 6c00106 | -0.68 | 11.64 | um06312 | 0.01  | 13.68 |
| 6c00107 | -0.69 | 12.78 | um06313 | 0.36  | 11.80 |
| 6c00108 | 0.16  | 10.99 | um06314 | -0.36 | 12.04 |
| 6c00109 | 0.53  | 13.05 | um06315 | 0.35  | 11.44 |
| 6c00110 | 0.22  | 10.11 | um06316 | -0.31 | 14.45 |
| 6c00111 | -0.20 | 13.08 | um06317 | -0.25 | 12.40 |
| 6c00112 | -0.04 | 12.37 | um06318 | 0.93  | 10.08 |
| 6c00113 | -0.61 | 14.01 | um06319 | -0.32 | 10.92 |
| 6c00114 | -0.18 | 12.09 | um06320 | -0.35 | 12.88 |
| 6c00115 | -0.05 | 13.15 | um06321 | 0.00  | 11.61 |
| 6c00116 | 0.31  | 12.76 | um06322 | -0.03 | 8.75  |
| 6c00117 | 0.24  | 13.67 | um06323 | -0.80 | 11.01 |
| 6c00118 | -0.10 | 12.57 | um06324 | 0.09  | 10.86 |
| 6c00119 | 0.07  | 13.40 | um06325 | 0.23  | 14.32 |
| 6c00120 | 0.04  | 13.26 | um06326 | 0.49  | 11.47 |
| 6c00121 | -0.22 | 12.98 | um06327 | 3.17  | 11.14 |
| 6c00122 | 1.02  | 10.66 | um06328 | 0.27  | 13.53 |
| 6c00123 | -0.15 | 10.34 | um06329 | -0.31 | 11.65 |
| 6c00124 | 0.13  | 10.25 | um06330 | 0.00  | 11.82 |
| 6c00125 | -0.02 | 13.05 | um06331 | -0.26 | 12.77 |

|         |       |       |         |       |       |
|---------|-------|-------|---------|-------|-------|
| 6c00126 | -0.41 | 11.55 | um06366 | -0.22 | 10.16 |
| 6c00127 | 0.18  | 9.64  | um06367 | -1.96 | 11.09 |
| 6c00128 | 0.32  | 12.37 | um06368 | -0.65 | 12.22 |
| 6c00129 | 0.04  | 9.74  | um06370 | -0.26 | 8.55  |
| 6c00130 | -0.33 | 13.29 | um06371 | -0.61 | 10.89 |
| 6c00131 | 0.05  | 11.32 | um06372 | 0.12  | 11.82 |
| 6c00132 | -0.05 | 12.23 | um06374 | -0.34 | 12.11 |
| 6c00133 | 0.05  | 11.73 | um06376 | -0.29 | 14.06 |
| 6c00134 | -0.16 | 9.32  | um06377 | 0.29  | 12.40 |
| 6c00135 | 0.16  | 12.59 | um06378 | 0.95  | 12.03 |
| 6c00136 | 0.30  | 12.79 | um06381 | -0.84 | 11.01 |
| 6c00137 | -0.14 | 10.90 | um06383 | 0.27  | 11.98 |
| 6d00001 | -0.13 | 10.68 | um06384 | 0.06  | 8.62  |
| 6d00002 | 0.52  | 9.56  | um06385 | -0.44 | 13.17 |
| 6d00003 | -0.38 | 9.96  | um06386 | 0.09  | 11.83 |
| 6d00004 | -2.69 | 14.22 | um06387 | 0.34  | 12.25 |
| 6d00005 | 0.10  | 13.80 | um06388 | -0.22 | 12.45 |
| 6d00006 | 0.10  | 9.60  | um06389 | 0.44  | 12.34 |
| 6d00007 | -0.02 | 12.56 | um06390 | 0.45  | 10.29 |
| 6d00008 | -0.31 | 10.09 | um06391 | 0.73  | 11.76 |
| 6d00009 | -0.82 | 10.62 | um06393 | -0.18 | 14.41 |
| 6d00010 | 0.08  | 12.80 | um06394 | -0.07 | 12.87 |
| 6d00011 | -0.14 | 11.62 | um06395 | 0.37  | 12.38 |
| 6d00012 | -0.29 | 9.85  | um06396 | 0.57  | 11.38 |
| 6d00013 | -0.12 | 8.85  | um06397 | 0.55  | 11.14 |
| 6d00014 | 0.30  | 12.32 | um06398 | -0.11 | 11.52 |
| 6d00015 | -0.37 | 11.05 | um06399 | 0.52  | 12.20 |
| 6d00016 | -0.06 | 10.67 | um06400 | 2.35  | 13.75 |
| 6d00017 | -0.55 | 13.99 | um06401 | -0.27 | 11.51 |
| 6d00018 | 0.11  | 13.62 | um06402 | -0.32 | 11.46 |
| 6d00019 | -0.13 | 12.66 | um06404 | -1.28 | 15.28 |
| 6d00020 | -0.28 | 12.19 | um06405 | 0.37  | 13.63 |
| 6d00021 | 1.04  | 11.64 | um06406 | 1.43  | 14.74 |
| 6d00022 | -0.13 | 8.50  | um06407 | -0.48 | 11.15 |
| 6d00023 | 0.15  | 12.24 | um06408 | 0.36  | 11.48 |
| 6d00024 | 0.11  | 9.41  | um06410 | 0.20  | 11.56 |
| 6d00025 | 0.00  | 8.73  | um06411 | -0.34 | 10.32 |
| 6d00026 | -0.10 | 10.80 | um06412 | -0.19 | 11.40 |
| 6d00027 | -1.46 | 12.55 | um06413 | -0.05 | 11.61 |
| 6d00028 | 0.31  | 10.75 | um06414 | -0.18 | 9.62  |
| 6d00029 | -0.10 | 12.09 | um06416 | -0.17 | 11.63 |
| 6d00030 | -0.57 | 11.30 | um06417 | -0.26 | 11.05 |
| 6d00031 | -0.53 | 12.84 | um06418 | -0.72 | 9.44  |
| 6d00032 | -0.30 | 9.39  | um06419 | -0.19 | 8.78  |
| 6d00033 | -0.13 | 8.42  | um06420 | -0.04 | 11.32 |
| 6d00034 | -0.09 | 8.59  | um06421 | 0.33  | 13.41 |
| 6d00035 | 0.23  | 8.59  | um06422 | 1.28  | 13.56 |
| 6d00036 | 0.00  | 9.33  | um06425 | -0.02 | 11.26 |
| 6d00037 | -0.41 | 11.78 | um06426 | -0.93 | 12.87 |
| 6d00038 | -1.19 | 11.27 | um06427 | -0.75 | 10.95 |
| 6d00039 | 0.07  | 12.92 | um06428 | -0.31 | 9.63  |
| 6d00040 | 0.26  | 11.46 | um06429 | 0.22  | 12.92 |
| 6d00041 | -0.23 | 9.24  | um06430 | -0.70 | 12.07 |
| 6d00042 | 0.09  | 12.73 | um06431 | 0.35  | 10.22 |

|         |       |       |         |       |       |
|---------|-------|-------|---------|-------|-------|
| 6d00043 | -0.08 | 12.47 | um06433 | 0.19  | 8.90  |
| 6d00044 | 0.37  | 12.71 | um06434 | -0.03 | 12.31 |
| 6d00045 | 0.42  | 9.59  | um06435 | -0.06 | 8.59  |
| 6d00046 | 0.99  | 10.99 | um06436 | 0.71  | 9.90  |
| 6d00047 | -0.29 | 12.57 | um06437 | 2.32  | 12.90 |
| 6d00048 | 0.04  | 9.62  | um06438 | 2.26  | 12.18 |
| 6d00049 | 0.75  | 14.00 | um06439 | -0.36 | 9.05  |
| 6d00050 | -0.52 | 9.42  | um06440 | -0.90 | 12.12 |
| 6d00051 | -0.05 | 8.87  | um06441 | -0.25 | 13.54 |
| 6d00052 | -1.30 | 10.82 | um06442 | -0.22 | 12.47 |
| 6d00053 | -0.16 | 12.43 | um06443 | 0.16  | 15.37 |
| 6d00054 | 0.46  | 12.41 | um06444 | 0.22  | 13.73 |
| 6d00055 | -0.17 | 11.90 | um06445 | -2.59 | 12.76 |
| 6d00056 | -0.46 | 11.90 | um06446 | -0.96 | 11.73 |
| 6d00057 | -0.07 | 8.87  | um06447 | 0.52  | 11.64 |
| 6d00058 | -0.06 | 8.54  | um06448 | -1.70 | 10.52 |
| 6d00059 | 0.11  | 8.43  | um06449 | 0.03  | 8.96  |
| 6d00060 | -0.80 | 15.24 | um06450 | 0.11  | 9.23  |
| 6d00061 | 0.18  | 11.89 | um06451 | -0.47 | 8.99  |
| 6d00062 | -0.32 | 12.53 | um06452 | 0.07  | 8.93  |
| 6d00063 | -0.16 | 8.95  | um06453 | -0.02 | 9.27  |
| 6d00064 | -0.10 | 8.62  | um06454 | -0.67 | 9.37  |
| 6d00065 | 0.26  | 10.53 | um06455 | -0.45 | 8.87  |
| 6d00066 | 0.17  | 12.46 | um06456 | -0.36 | 8.54  |
| 6d00067 | 0.01  | 13.05 | um06457 | -1.38 | 9.77  |
| 6d00068 | -0.73 | 11.96 | um06458 | -2.68 | 9.91  |
| 6d00069 | 0.00  | 11.27 | um06459 | -0.51 | 12.53 |
| 6d00070 | -1.20 | 14.60 | um06460 | 0.08  | 9.34  |
| 6d00071 | -0.26 | 11.91 | um06461 | 0.75  | 12.34 |
| 6d00072 | 0.09  | 11.84 | um06462 | 0.06  | 8.40  |
| 6d00073 | -0.47 | 11.16 | um06463 | 1.05  | 13.17 |
| 6d00074 | -0.21 | 13.09 | um06464 | 0.46  | 11.27 |
| 6d00075 | 0.31  | 12.77 | um06465 | -0.50 | 13.54 |
| 6d00076 | 0.06  | 8.70  | um06466 | 0.18  | 11.06 |
| 6d00077 | -0.18 | 11.03 | um06467 | 0.41  | 11.84 |
| 6d00078 | 0.23  | 11.39 | um06468 | -1.79 | 10.35 |
| 6d00079 | 0.36  | 9.08  | um06469 | -2.71 | 10.29 |
| 6d00080 | -0.39 | 11.72 | um06470 | -0.69 | 12.67 |
| 6d00081 | -0.20 | 11.59 | um06471 | -1.75 | 9.41  |
| 6d00082 | -0.87 | 10.94 | um06472 | 0.37  | 11.10 |
| 6d00083 | -0.45 | 10.72 | um06473 | 0.47  | 11.12 |
| 6d00084 | -0.08 | 8.87  | um06474 | 0.63  | 13.15 |
| 6d00085 | -0.15 | 9.51  | um06475 | -1.55 | 10.93 |
| 6d00086 | 0.23  | 8.68  | um06476 | -0.22 | 10.37 |
| 6d00087 | -0.09 | 8.56  | um06477 | 0.38  | 9.52  |
| 6d00088 | -0.08 | 8.83  | um06478 | -0.38 | 13.34 |
| 6d00089 | -0.64 | 13.26 | um06479 | 0.49  | 10.50 |
| 6d00090 | -0.05 | 11.68 | um06480 | -0.06 | 13.06 |
| 6d00091 | -0.03 | 10.23 | um06481 | -1.17 | 9.31  |
| 6d00092 | -0.06 | 12.18 | um06482 | -1.23 | 9.04  |
| 6d00093 | -0.10 | 9.86  | um06483 | -0.28 | 11.92 |
| 6d00094 | -0.22 | 9.88  | um06484 | -0.34 | 13.69 |
| 6d00095 | -0.18 | 12.06 | um10000 | -0.25 | 12.13 |
| 6d00096 | -0.47 | 14.13 | um10001 | 0.38  | 11.40 |

|         |       |       |         |       |       |
|---------|-------|-------|---------|-------|-------|
| 6d00097 | -0.16 | 14.67 | um10002 | 0.72  | 10.39 |
| 6d00098 | -0.10 | 13.67 | um10003 | 0.79  | 15.25 |
| 6d00099 | -0.14 | 9.19  | um10004 | 0.38  | 12.57 |
| 6d00100 | -0.26 | 13.00 | um10005 | -0.17 | 11.25 |
| 6d00101 | -0.20 | 13.71 | um10006 | -0.29 | 11.53 |
| 6d00102 | 0.80  | 11.45 | um10007 | -0.77 | 11.12 |
| 6d00103 | -0.31 | 10.09 | um10008 | -0.51 | 9.78  |
| 6d00104 | -0.62 | 12.28 | um10009 | 0.76  | 11.12 |
| 6d00105 | -0.63 | 11.81 | um10010 | 1.12  | 13.43 |
| 6d00106 | 0.48  | 11.64 | um10011 | 0.46  | 12.99 |
| 6d00107 | 0.35  | 11.78 | um10012 | -0.18 | 12.96 |
| 6d00108 | 0.14  | 12.57 | um10013 | -0.28 | 11.88 |
| 6d00109 | -0.23 | 12.61 | um10014 | -0.35 | 13.99 |
| 6d00110 | 0.03  | 12.95 | um10015 | 0.15  | 11.01 |
| 6d00111 | 0.93  | 10.29 | um10016 | 0.79  | 10.67 |
| 6d00112 | -0.01 | 8.88  | um10017 | 0.10  | 12.17 |
| 6d00113 | -0.18 | 12.40 | um10018 | -0.56 | 12.06 |
| 6d00114 | 0.06  | 15.72 | um10019 | 0.58  | 11.96 |
| 6d00115 | -1.06 | 10.96 | um10020 | 0.27  | 12.16 |
| 6d00116 | 0.03  | 10.54 | um10021 | -0.27 | 12.47 |
| 6d00117 | -0.04 | 12.53 | um10022 | 0.46  | 11.22 |
| 6d00118 | 0.10  | 12.20 | um10023 | -0.32 | 12.09 |
| 6d00119 | 0.33  | 12.94 | um10024 | -0.37 | 13.92 |
| 6d00120 | -0.30 | 11.99 | um10025 | -0.06 | 11.45 |
| 6d00121 | -0.33 | 9.43  | um10027 | 0.35  | 11.88 |
| 6d00122 | 0.04  | 8.57  | um10028 | 0.48  | 11.88 |
| 6d00123 | 0.08  | 12.66 | um10029 | -0.07 | 11.63 |
| 6d00124 | 0.36  | 11.72 | um10030 | -0.15 | 10.23 |
| 6d00125 | 0.04  | 12.63 | um10031 | 1.32  | 13.09 |
| 6d00126 | 0.10  | 13.12 | um10032 | 1.31  | 12.06 |
| 6d00127 | 0.20  | 13.23 | um10033 | 0.37  | 12.50 |
| 6d00128 | 0.10  | 9.58  | um10034 | 0.36  | 12.31 |
| 6d00129 | -0.30 | 12.92 | um10035 | -0.39 | 14.48 |
| 6d00130 | 0.05  | 11.90 | um10036 | -0.14 | 11.00 |
| 6d00131 | 0.11  | 9.20  | um10037 | -0.25 | 13.71 |
| 6d00132 | -0.11 | 11.39 | um10038 | 0.67  | 14.44 |
| 6d00133 | 0.01  | 11.65 | um10039 | -0.70 | 12.48 |
| 6d00134 | 0.10  | 12.19 | um10040 | 0.10  | 10.96 |
| 6d00135 | 0.07  | 13.43 | um10041 | -0.63 | 10.87 |
| 7c00001 | -0.35 | 11.48 | um10042 | 0.09  | 10.82 |
| 7c00002 | 0.22  | 12.92 | um10043 | 0.10  | 10.52 |
| 7c00003 | -0.98 | 10.91 | um10044 | -0.25 | 12.53 |
| 7c00004 | 0.30  | 9.92  | um10045 | 0.03  | 9.02  |
| 7c00005 | 0.04  | 8.48  | um10046 | 0.59  | 13.16 |
| 7c00006 | 0.58  | 10.02 | um10047 | 0.33  | 10.84 |
| 7c00007 | -0.52 | 9.30  | um10048 | -0.08 | 14.98 |
| 7c00008 | -0.12 | 8.76  | um10049 | -0.08 | 10.95 |
| 7c00009 | 0.02  | 8.53  | um10050 | -0.15 | 12.56 |
| 7c00010 | 0.13  | 10.41 | um10051 | 0.73  | 14.74 |
| 7c00011 | -0.08 | 8.75  | um10052 | -1.22 | 11.88 |
| 7c00012 | -0.20 | 9.99  | um10053 | -0.73 | 11.97 |
| 7c00013 | -0.65 | 13.79 | um10054 | 0.36  | 10.76 |
| 7c00014 | 0.34  | 12.83 | um10055 | -1.14 | 10.73 |
| 7c00015 | -0.08 | 12.89 | um10056 | 2.17  | 12.71 |



|         |       |       |         |       |       |
|---------|-------|-------|---------|-------|-------|
| 7c00016 | -0.34 | 15.54 | um10057 | -0.40 | 12.53 |
| 7c00017 | -0.21 | 10.32 | um10059 | -0.66 | 14.99 |
| 7c00018 | 0.84  | 14.92 | um10060 | 0.51  | 12.00 |
| 7c00019 | -0.37 | 12.39 | um10061 | 0.48  | 11.92 |
| 7c00020 | 0.09  | 12.51 | um10062 | -0.38 | 13.87 |
| 7c00021 | 0.41  | 13.76 | um10063 | 0.10  | 10.44 |
| 7c00022 | 0.24  | 12.78 | um10064 | 0.11  | 13.78 |
| 7c00023 | 0.27  | 12.98 | um10065 | 0.41  | 12.12 |
| 7c00024 | -0.44 | 10.95 | um10066 | 0.25  | 11.79 |
| 7c00025 | 0.54  | 11.03 | um10067 | 1.03  | 11.33 |
| 7c00026 | -0.31 | 10.25 | um10068 | -0.08 | 9.85  |
| 7c00027 | 0.70  | 14.21 | um10069 | 0.46  | 10.98 |
| 7c00028 | -0.12 | 11.30 | um10070 | 0.96  | 10.90 |
| 7c00029 | 0.04  | 12.70 | um10071 | 0.49  | 12.67 |
| 7c00030 | 0.17  | 11.92 | um10072 | 1.24  | 11.39 |
| 7c00031 | -0.33 | 11.79 | um10073 | -1.09 | 13.31 |
| 7c00032 | -0.24 | 12.42 | um10074 | 0.04  | 11.31 |
| 7c00033 | -0.57 | 12.85 | um10075 | 0.21  | 12.25 |
| 7c00034 | -0.43 | 10.81 | um10076 | 0.09  | 8.90  |
| 7c00035 | -0.53 | 14.26 | um10077 | 0.95  | 12.41 |
| 7c00036 | -0.07 | 12.55 | um10078 | 0.15  | 11.20 |
| 7c00037 | 0.13  | 11.71 | um10079 | 0.09  | 13.03 |
| 7c00038 | 0.38  | 13.94 | um10080 | -0.87 | 13.17 |
| 7c00039 | 0.33  | 11.87 | um10081 | 0.36  | 12.71 |
| 7c00040 | -0.47 | 10.58 | um10082 | 0.35  | 11.86 |
| 7c00041 | -0.08 | 12.57 | um10083 | 1.53  | 11.98 |
| 7c00042 | -0.15 | 12.02 | um10085 | 0.70  | 11.32 |
| 7c00043 | 0.01  | 9.70  | um10086 | -0.07 | 11.96 |
| 7c00044 | -0.03 | 11.75 | um10087 | -0.30 | 11.24 |
| 7c00045 | -0.10 | 12.75 | um10088 | 0.71  | 10.50 |
| 7c00046 | -0.78 | 13.54 | um10089 | 0.04  | 11.14 |
| 7c00047 | -0.16 | 11.52 | um10091 | -0.49 | 12.35 |
| 7c00048 | 0.12  | 13.75 | um10092 | -0.26 | 10.69 |
| 7c00049 | -0.31 | 12.83 | um10093 | 0.51  | 10.40 |
| 7c00050 | -0.72 | 12.63 | um10094 | -0.59 | 12.06 |
| 7c00051 | 0.44  | 12.62 | um10095 | 0.46  | 12.92 |
| 7c00052 | 0.22  | 11.32 | um10097 | 0.74  | 12.73 |
| 7c00053 | 0.80  | 12.17 | um10098 | -0.40 | 11.79 |
| 7c00054 | -0.19 | 12.69 | um10099 | -0.18 | 12.60 |
| 7c00055 | -0.51 | 12.56 | um10100 | 0.19  | 11.21 |
| 7c00056 | -0.74 | 13.41 | um10101 | 0.22  | 10.22 |
| 7c00057 | 0.47  | 11.61 | um10102 | 0.15  | 11.93 |
| 7c00058 | -0.04 | 12.43 | um10103 | -0.37 | 11.84 |
| 7c00059 | -0.31 | 11.97 | um10104 | -0.98 | 11.56 |
| 7c00060 | 0.12  | 12.46 | um10105 | 0.20  | 11.29 |
| 7c00061 | -0.02 | 11.84 | um10106 | -0.34 | 11.78 |
| 7c00062 | -0.20 | 12.54 | um10107 | -2.11 | 13.85 |
| 7c00063 | 0.03  | 9.80  | um10108 | 0.23  | 11.60 |
| 7c00064 | 0.01  | 11.82 | um10109 | 0.31  | 11.41 |
| 7c00065 | -0.26 | 11.18 | um10110 | 0.26  | 14.95 |
| 7c00066 | 0.03  | 11.00 | um10112 | 0.81  | 11.16 |
| 7c00067 | -0.07 | 10.40 | um10113 | -0.47 | 10.55 |
| 7c00068 | 0.06  | 8.54  | um10114 | 0.13  | 14.72 |
| 7c00069 | 0.24  | 11.58 | um10115 | 0.01  | 8.57  |

|         |       |       |         |       |       |
|---------|-------|-------|---------|-------|-------|
| 7c00070 | 0.10  | 11.49 | um10116 | 0.28  | 10.89 |
| 7c00071 | -0.17 | 11.67 | um10117 | -0.60 | 12.13 |
| 7c00072 | 0.44  | 13.16 | um10118 | 0.41  | 10.96 |
| 7c00073 | 0.28  | 10.90 | um10119 | -0.44 | 10.13 |
| 7c00074 | -0.27 | 15.68 | um10120 | -2.06 | 10.60 |
| 7c00075 | 0.72  | 13.30 | um10121 | 0.07  | 11.15 |
| 7c00076 | -0.04 | 12.86 | um10122 | -0.09 | 10.13 |
| 7c00077 | 0.40  | 12.58 | um10123 | -0.03 | 13.45 |
| 7c00078 | 0.22  | 12.16 | um10124 | 0.69  | 12.14 |
| 7c00079 | 0.21  | 13.74 | um10126 | 0.31  | 12.24 |
| 7c00080 | -0.26 | 11.09 | um10127 | 0.37  | 14.90 |
| 7c00081 | -0.44 | 14.69 | um10128 | 0.06  | 12.41 |
| 7c00082 | 0.05  | 12.76 | um10129 | 0.18  | 13.32 |
| 7c00083 | 0.38  | 12.86 | um10130 | 0.39  | 11.39 |
| 7c00084 | 0.00  | 9.06  | um10131 | -0.68 | 12.11 |
| 7c00085 | -0.23 | 11.91 | um10132 | -0.28 | 13.48 |
| 7c00086 | -0.08 | 10.89 | um10133 | 0.60  | 11.05 |
| 7c00087 | -0.20 | 11.03 | um10134 | -0.13 | 11.74 |
| 7c00088 | 0.76  | 12.87 | um10135 | 0.12  | 9.33  |
| 7c00089 | 0.10  | 9.08  | um10136 | 0.03  | 12.42 |
| 7c00090 | 0.43  | 11.90 | um10138 | 0.41  | 11.07 |
| 7c00091 | 0.50  | 12.78 | um10139 | -0.10 | 11.12 |
| 7c00092 | -0.04 | 15.36 | um10140 | 0.72  | 12.66 |
| 7c00093 | -1.68 | 11.60 | um10141 | 0.63  | 11.72 |
| 7c00094 | 0.13  | 11.96 | um10142 | 0.15  | 10.90 |
| 7c00095 | 0.02  | 10.37 | um10143 | 1.21  | 13.72 |
| 7c00096 | 0.43  | 14.80 | um10144 | 0.33  | 11.29 |
| 7c00097 | 0.11  | 12.69 | um10145 | -0.23 | 12.15 |
| 7c00098 | 0.48  | 13.52 | um10146 | 0.18  | 14.64 |
| 7c00099 | 0.04  | 12.06 | um10147 | 0.30  | 15.16 |
| 7c00100 | -0.64 | 12.28 | um10148 | 0.46  | 10.85 |
| 7c00101 | 0.20  | 13.56 | um10149 | -0.07 | 15.62 |
| 7c00102 | -0.27 | 9.76  | um10151 | 0.73  | 11.06 |
| 7c00103 | 0.14  | 11.41 | um10152 | 0.05  | 11.55 |
| 7c00104 | -0.12 | 8.98  | um10153 | -0.22 | 12.95 |
| 7c00105 | 0.10  | 11.93 | um10154 | -0.09 | 10.31 |
| 7c00106 | -0.69 | 11.00 | um10155 | 0.37  | 12.05 |
| 7c00107 | -0.17 | 9.34  | um10156 | 0.03  | 15.01 |
| 7c00108 | -0.11 | 8.71  | um10157 | -0.58 | 12.49 |
| 7c00109 | -0.02 | 8.56  | um10158 | 0.04  | 12.82 |
| 7c00110 | -0.13 | 8.83  | um10159 | 0.47  | 11.51 |
| 7c00111 | 0.00  | 8.81  | um10160 | -0.22 | 12.57 |
| 7c00112 | 0.28  | 11.14 | um10161 | -0.02 | 12.27 |
| 7c00113 | -0.08 | 11.95 | um10162 | 0.24  | 12.82 |
| 7c00114 | -0.24 | 10.68 | um10163 | 0.28  | 14.70 |
| 7c00115 | -0.09 | 15.05 | um10164 | 0.58  | 10.57 |
| 7c00116 | -0.02 | 12.09 | um10165 | -0.10 | 11.95 |
| 7c00117 | -0.27 | 14.10 | um10166 | -0.44 | 10.92 |
| 7c00118 | 0.35  | 10.93 | um10167 | -0.68 | 15.83 |
| 7c00119 | -0.07 | 11.30 | um10168 | 0.10  | 13.20 |
| 7c00120 | 0.14  | 12.87 | um10169 | -0.26 | 13.48 |
| 7c00121 | 0.26  | 13.51 | um10170 | -0.80 | 11.56 |
| 7c00122 | 0.19  | 13.30 | um10171 | -0.02 | 8.76  |
| 7c00123 | 0.32  | 10.70 | um10172 | 0.57  | 12.44 |

|         |       |       |         |       |       |
|---------|-------|-------|---------|-------|-------|
| 7c00124 | 0.01  | 12.73 | um10173 | 0.27  | 13.85 |
| 7c00125 | 0.41  | 10.60 | um10174 | -0.39 | 12.23 |
| 7c00126 | 0.10  | 12.36 | um10175 | 0.07  | 12.20 |
| 7c00127 | -0.48 | 11.02 | um10176 | 0.17  | 13.71 |
| 7c00128 | -0.18 | 13.48 | um10177 | 0.20  | 13.73 |
| 7c00129 | 0.05  | 12.64 | um10178 | -0.30 | 12.92 |
| 7c00130 | 0.24  | 13.10 | um10179 | 0.16  | 13.70 |
| 7c00131 | -0.37 | 12.57 | um10180 | -0.10 | 15.05 |
| 7c00132 | -0.21 | 12.20 | um10181 | -0.71 | 11.61 |
| 7c00133 | 0.11  | 10.21 | um10182 | -0.15 | 15.26 |
| 7c00134 | 0.00  | 12.15 | um10183 | 1.04  | 13.67 |
| 7c00135 | 0.18  | 9.18  | um10184 | -0.41 | 12.64 |
| 7c00136 | -0.73 | 12.17 | um10185 | -0.34 | 12.03 |
| 7c00137 | 0.11  | 9.74  | um10186 | -2.87 | 10.71 |
| 7c00138 | -0.15 | 10.41 | um10187 | 0.25  | 13.60 |
| 7c00139 | 0.18  | 10.74 | um10188 | -1.72 | 13.49 |
| 7c00140 | 0.59  | 12.51 | um10189 | -1.76 | 12.13 |
| 7c00141 | -0.13 | 12.54 | um10190 | 0.56  | 11.33 |
| 7c00142 | 0.51  | 13.22 | um10191 | 0.36  | 11.06 |
| 7c00143 | 0.30  | 11.20 | um10192 | -0.32 | 12.24 |
| 7c00144 | 0.00  | 8.62  | um10193 | -0.18 | 8.71  |
| 7c00145 | 0.28  | 12.14 | um10194 | -0.07 | 12.56 |
| 7c00146 | -0.02 | 9.83  | um10195 | 0.19  | 13.64 |
| 7c00147 | -0.05 | 12.38 | um10196 | 0.54  | 14.53 |
| 7c00148 | 0.19  | 14.37 | um10197 | 0.22  | 15.04 |
| 7c00149 | 0.12  | 10.22 | um10198 | 0.45  | 11.89 |
| 7c00150 | -0.06 | 8.70  | um10200 | 0.37  | 12.03 |
| 7c00151 | -0.71 | 12.42 | um10201 | 0.51  | 9.42  |
| 7c00152 | 0.35  | 13.31 | um10202 | -0.02 | 8.75  |
| 7c00153 | 0.11  | 12.90 | um10203 | -0.09 | 8.54  |
| 7c00154 | -0.88 | 11.54 | um10204 | 0.10  | 12.97 |
| 7c00155 | -0.07 | 15.70 | um10205 | -0.50 | 13.31 |
| 7c00156 | 0.04  | 13.38 | um10206 | 0.28  | 10.21 |
| 7c00157 | 0.06  | 12.54 | um10207 | -0.17 | 12.50 |
| 7c00158 | 0.64  | 11.96 | um10208 | 2.70  | 12.11 |
| 7c00159 | -0.07 | 10.87 | um10209 | 0.29  | 12.17 |
| 7c00160 | -0.22 | 11.40 | um10210 | -0.39 | 15.46 |
| 7c00161 | -0.06 | 12.45 | um10211 | -0.96 | 11.52 |
| 7c00162 | 0.24  | 10.71 | um10212 | -0.01 | 10.47 |
| 7c00163 | 0.27  | 10.98 | um10213 | -0.26 | 15.46 |
| 7c00164 | -0.04 | 9.97  | um10214 | 0.37  | 13.82 |
| 7c00165 | 0.19  | 11.55 | um10215 | 0.24  | 13.50 |
| 7c00166 | 0.20  | 11.59 | um10217 | 0.09  | 11.98 |
| 7c00167 | -0.25 | 13.23 | um10218 | -0.06 | 10.30 |
| 7c00168 | 0.08  | 12.62 | um10219 | -0.85 | 10.73 |
| 7c00169 | 0.16  | 9.39  | um10220 | 0.02  | 10.26 |
| 7c00170 | -0.51 | 12.04 | um10221 | -0.47 | 12.43 |
| 7c00171 | -0.48 | 14.22 | um10223 | 1.66  | 11.96 |
| 7c00172 | 0.32  | 12.32 | um10225 | -0.26 | 13.01 |
| 7c00173 | 0.05  | 9.00  | um10226 | 0.08  | 13.81 |
| 7c00174 | 0.64  | 13.11 | um10227 | 0.18  | 12.98 |
| 7c00175 | 0.47  | 13.11 | um10228 | -0.16 | 8.68  |
| 7c00176 | 0.02  | 12.06 | um10229 | 0.44  | 12.76 |
| 7c00177 | -0.12 | 9.86  | um10230 | -0.22 | 8.60  |

|         |       |       |         |       |       |
|---------|-------|-------|---------|-------|-------|
| 7c00178 | -0.09 | 8.95  | um10231 | -0.25 | 13.42 |
| 7c00179 | -0.24 | 12.83 | um10232 | 0.13  | 15.04 |
| 7c00180 | 0.37  | 10.74 | um10233 | -0.09 | 8.68  |
| 7c00181 | -1.14 | 14.01 | um10234 | 1.19  | 11.80 |
| 7c00182 | 0.29  | 12.82 | um10235 | 0.87  | 11.18 |
| 7c00183 | -0.11 | 12.49 | um10236 | 0.11  | 14.63 |
| 7c00184 | -0.93 | 12.49 | um10237 | -0.28 | 10.57 |
| 7c00185 | 0.77  | 13.28 | um10238 | 0.46  | 14.57 |
| 7c00186 | -0.31 | 11.45 | um10239 | 0.73  | 12.22 |
| 7c00187 | -0.20 | 12.23 | um10241 | 0.51  | 10.77 |
| 7c00188 | 0.48  | 12.69 | um10242 | 0.66  | 13.14 |
| 7c00189 | -0.14 | 12.40 | um10243 | -0.19 | 12.14 |
| 7c00190 | 0.36  | 12.19 | um10244 | 0.33  | 11.15 |
| 7c00191 | 0.14  | 10.24 | um10245 | -0.27 | 11.54 |
| 7c00192 | 0.09  | 10.59 | um10246 | -0.35 | 13.02 |
| 7c00193 | -0.07 | 12.46 | um10248 | 0.81  | 11.31 |
| 7c00194 | -0.05 | 9.05  | um10251 | 0.20  | 11.69 |
| 7c00195 | -0.18 | 15.36 | um10252 | 0.74  | 13.67 |
| 7c00196 | -0.10 | 12.40 | um10253 | 0.86  | 12.75 |
| 7c00197 | 0.74  | 13.89 | um10254 | -0.89 | 12.70 |
| 7c00198 | -0.03 | 12.14 | um10255 | 0.13  | 11.67 |
| 7c00199 | -0.03 | 10.83 | um10256 | 0.29  | 11.53 |
| 7c00200 | 0.29  | 11.36 | um10257 | 0.26  | 11.86 |
| 7c00201 | 0.11  | 11.96 | um10258 | 0.34  | 10.94 |
| 7c00202 | 0.10  | 11.92 | um10259 | -0.28 | 11.28 |
| 7c00203 | 0.25  | 9.64  | um10260 | -0.48 | 11.97 |
| 7c00204 | -0.23 | 11.01 | um10261 | 0.18  | 11.95 |
| 7c00205 | 0.09  | 12.71 | um10262 | -0.33 | 14.20 |
| 7c00206 | -0.22 | 13.04 | um10263 | 1.18  | 12.19 |
| 7c00207 | 0.07  | 12.65 | um10264 | 0.28  | 9.27  |
| 7c00208 | -0.36 | 11.84 | um10265 | 0.23  | 12.22 |
| 7c00209 | 0.36  | 10.81 | um10266 | -0.60 | 12.66 |
| 7c00210 | -0.96 | 12.52 | um10267 | -0.22 | 12.25 |
| 7c00211 | 0.18  | 10.67 | um10268 | 1.55  | 14.01 |
| 7c00212 | 0.47  | 11.31 | um10269 | -0.29 | 8.57  |
| 7c00213 | -0.03 | 14.22 | um10270 | 0.10  | 12.39 |
| 7c00214 | 0.32  | 12.15 | um10271 | -0.40 | 12.63 |
| 7c00215 | 0.59  | 11.54 | um10272 | -0.03 | 12.62 |
| 7c00216 | 0.44  | 9.71  | um10273 | 0.81  | 13.84 |
| 7c00217 | -0.16 | 11.67 | um10274 | -0.26 | 13.58 |
| 7c00218 | 0.18  | 9.68  | um10275 | -0.02 | 11.49 |
| 7c00219 | 0.18  | 13.71 | um10276 | 0.10  | 12.68 |
| 7c00220 | 0.64  | 12.17 | um10277 | -0.44 | 12.64 |
| 7c00221 | 0.82  | 12.43 | um10278 | -0.23 | 8.92  |
| 7c00222 | -0.04 | 9.87  | um10279 | -0.17 | 11.70 |
| 7c00223 | 0.35  | 12.60 | um10280 | -0.33 | 13.57 |
| 7c00224 | 0.04  | 11.95 | um10282 | 0.24  | 9.07  |
| 7c00225 | 0.10  | 11.90 | um10283 | -0.41 | 13.35 |
| 7c00226 | -0.19 | 10.94 | um10284 | -0.09 | 11.57 |
| 7c00227 | 0.16  | 12.15 | um10285 | -0.13 | 11.75 |
| 7c00228 | 0.07  | 10.77 | um10286 | -0.65 | 14.64 |
| 7c00229 | -0.40 | 11.99 | um10287 | -0.49 | 13.65 |
| 7c00230 | 0.19  | 11.74 | um10289 | 0.70  | 9.79  |
| 7c00231 | -0.24 | 9.59  | um10290 | 0.14  | 14.60 |

|         |       |       |         |       |       |
|---------|-------|-------|---------|-------|-------|
| 7c00232 | -0.44 | 11.02 | um10293 | 0.06  | 12.48 |
| 7c00233 | 0.43  | 13.43 | um10294 | 0.03  | 11.61 |
| 7c00234 | 0.18  | 12.13 | um10295 | 0.16  | 10.60 |
| 7c00235 | -1.12 | 12.44 | um10296 | 0.01  | 14.49 |
| 7c00236 | -0.30 | 12.73 | um10297 | 0.23  | 10.58 |
| 7c00237 | -0.59 | 12.70 | um10298 | -0.04 | 11.10 |
| 7c00238 | 0.03  | 13.21 | um10299 | 0.15  | 11.09 |
| 7c00239 | -0.36 | 12.14 | um10300 | 0.01  | 11.43 |
| 7c00240 | -0.55 | 12.74 | um10301 | 0.11  | 12.58 |
| 7c00241 | 0.03  | 13.39 | um10302 | 0.33  | 10.89 |
| 7c00242 | 0.05  | 11.24 | um10304 | -0.14 | 11.14 |
| 7c00243 | 0.18  | 12.02 | um10305 | -0.05 | 12.51 |
| 7c00244 | 0.02  | 11.51 | um10306 | 0.12  | 11.90 |
| 7c00245 | -0.39 | 12.69 | um10307 | 0.04  | 12.32 |
| 7c00246 | 0.05  | 14.36 | um10308 | -0.56 | 12.17 |
| 7c00247 | 0.97  | 12.71 | um10309 | -0.19 | 10.57 |
| 7c00248 | 0.06  | 9.62  | um10310 | -0.81 | 11.86 |
| 7c00249 | 0.00  | 13.23 | um10311 | 0.46  | 13.25 |
| 7c00250 | 0.02  | 10.56 | um10312 | 0.07  | 11.88 |
| 7c00251 | 0.32  | 11.49 | um10313 | 0.11  | 12.79 |
| 7c00252 | 1.00  | 13.96 | um10314 | -0.12 | 12.13 |
| 7c00253 | 0.18  | 12.75 | um10315 | -0.07 | 12.25 |
| 7c00254 | -0.21 | 11.77 | um10317 | 0.04  | 13.46 |
| 7c00255 | -0.27 | 13.36 | um10318 | -0.90 | 11.80 |
| 7c00256 | -0.29 | 11.37 | um10319 | -0.47 | 10.70 |
| 7c00257 | 0.12  | 12.46 | um10320 | -0.38 | 11.30 |
| 7c00258 | 0.20  | 12.68 | um10321 | -0.11 | 11.30 |
| 7c00259 | -0.31 | 9.92  | um10322 | -0.30 | 12.10 |
| 7c00260 | 0.28  | 12.89 | um10323 | -0.01 | 11.70 |
| 7c00261 | 0.21  | 12.40 | um10324 | -0.08 | 8.62  |
| 7c00262 | -0.62 | 13.62 | um10325 | -0.03 | 9.70  |
| 7c00263 | -1.52 | 12.05 | um10326 | -0.01 | 11.68 |
| 7c00264 | 0.02  | 12.14 | um10327 | -0.58 | 11.02 |
| 7c00265 | -0.45 | 11.76 | um10328 | 0.06  | 8.70  |
| 7c00266 | 0.18  | 15.41 | um10329 | -0.41 | 12.36 |
| 7c00267 | -0.27 | 11.81 | um10330 | -0.36 | 11.50 |
| 7c00268 | 0.29  | 12.39 | um10331 | -0.42 | 15.66 |
| 7c00269 | -0.12 | 12.08 | um10332 | -0.52 | 13.04 |
| 7c00270 | -0.10 | 8.93  | um10333 | 0.38  | 11.74 |
| 7c00271 | -0.28 | 12.82 | um10334 | 0.07  | 14.76 |
| 7c00272 | 0.18  | 13.48 | um10335 | 0.23  | 10.28 |
| 7c00273 | -0.12 | 11.31 | um10336 | 0.40  | 13.03 |
| 7c00274 | -0.36 | 12.66 | um10337 | 0.29  | 13.12 |
| 7c00275 | 0.19  | 12.42 | um10338 | 0.06  | 10.54 |
| 7c00276 | -0.35 | 10.72 | um10339 | -2.07 | 13.25 |
| 7c00277 | -0.40 | 10.17 | um10340 | 0.52  | 12.84 |
| 7c00278 | 0.35  | 12.18 | um10341 | 0.43  | 10.96 |
| 7c00279 | -0.85 | 11.57 | um10342 | 0.89  | 12.24 |
| 7c00280 | -0.15 | 11.95 | um10343 | -0.12 | 12.36 |
| 7c00281 | -0.07 | 15.89 | um10344 | -0.33 | 11.53 |
| 7c00282 | -0.52 | 12.11 | um10347 | 0.06  | 11.28 |
| 7c00283 | -0.13 | 11.05 | um10348 | -0.08 | 11.45 |
| 7c00284 | 0.16  | 13.50 | um10349 | 0.17  | 11.36 |
| 7c00285 | -0.53 | 14.35 | um10350 | -0.47 | 12.68 |

|         |       |       |         |       |       |
|---------|-------|-------|---------|-------|-------|
| 7c00286 | -0.42 | 13.38 | um10351 | 0.35  | 12.28 |
| 7c00287 | 0.06  | 12.97 | um10352 | 0.51  | 10.33 |
| 7c00288 | 0.02  | 11.93 | um10353 | 0.15  | 11.20 |
| 7c00289 | 0.07  | 11.06 | um10354 | 0.05  | 11.36 |
| 7c00290 | 0.23  | 11.26 | um10355 | 0.09  | 11.68 |
| 7c00291 | 0.53  | 10.22 | um10356 | -0.44 | 13.75 |
| 7c00292 | 1.17  | 11.89 | um10357 | -0.24 | 13.02 |
| 7c00293 | 0.63  | 11.73 | um10358 | 0.08  | 9.76  |
| 7c00294 | 0.26  | 12.92 | um10359 | 0.58  | 11.56 |
| 7c00295 | -0.12 | 10.14 | um10360 | 0.00  | 14.81 |
| 7c00296 | 0.82  | 10.23 | um10361 | 0.32  | 14.60 |
| 7c00297 | 0.17  | 14.34 | um10362 | -0.24 | 12.43 |
| 7c00298 | -0.20 | 12.68 | um10363 | -0.03 | 12.87 |
| 7c00299 | -0.17 | 13.21 | um10364 | -1.51 | 9.74  |
| 7c00300 | -0.08 | 11.23 | um10365 | -0.74 | 12.44 |
| 7c00301 | -0.09 | 12.94 | um10366 | 0.40  | 11.59 |
| 7c00302 | 0.39  | 10.82 | um10367 | 0.18  | 13.31 |
| 7c00303 | -0.26 | 9.81  | um10368 | -0.11 | 11.10 |
| 7c00304 | 0.17  | 9.87  | um10369 | 0.04  | 11.97 |
| 7c00305 | 0.08  | 12.93 | um10370 | -0.91 | 13.24 |
| 7c00306 | 0.18  | 11.30 | um10371 | 0.14  | 12.38 |
| 7c00307 | -0.52 | 10.74 | um10372 | 0.27  | 11.37 |
| 7c00308 | 0.37  | 10.59 | um10373 | -0.11 | 14.34 |
| 7c00309 | -0.01 | 11.45 | um10374 | -0.16 | 13.60 |
| 7c00310 | -0.08 | 10.56 | um10375 | 0.30  | 13.18 |
| 7c00311 | -0.74 | 12.03 | um10376 | -0.18 | 11.68 |
| 7c00312 | 0.00  | 10.16 | um10377 | 0.21  | 10.98 |
| 7c00313 | 0.34  | 13.04 | um10378 | -0.41 | 10.98 |
| 7c00314 | -0.34 | 15.04 | um10379 | 0.47  | 12.33 |
| 7c00315 | -0.40 | 12.03 | um10380 | -0.36 | 11.46 |
| 7c00316 | -0.65 | 12.64 | um10381 | 0.24  | 12.51 |
| 7c00317 | 0.17  | 13.64 | um10382 | -0.17 | 13.50 |
| 7c00318 | -0.04 | 12.20 | um10383 | 0.07  | 12.34 |
| 7c00319 | 0.35  | 13.84 | um10384 | -0.04 | 12.50 |
| 7c00320 | -0.34 | 11.43 | um10385 | -0.29 | 13.01 |
| 7c00321 | 0.00  | 9.19  | um10386 | -0.16 | 12.22 |
| 7c00322 | 0.31  | 13.78 | um10387 | -0.86 | 14.59 |
| 7c00323 | -0.02 | 9.26  | um10388 | 1.44  | 12.91 |
| 7c00324 | 0.04  | 13.28 | um10390 | -0.98 | 11.53 |
| 7c00325 | -0.51 | 11.97 | um10391 | -0.31 | 11.33 |
| 7c00326 | 0.27  | 12.88 | um10392 | 0.49  | 12.30 |
| 7c00327 | -0.17 | 8.99  | um10393 | 0.22  | 11.19 |
| 7c00328 | -0.23 | 12.05 | um10394 | -0.73 | 11.78 |
| 7c00329 | 0.05  | 11.61 | um10395 | 1.75  | 11.90 |
| 7c00330 | -0.46 | 10.82 | um10396 | 0.71  | 11.26 |
| 7c00331 | 0.18  | 12.58 | um10397 | -0.30 | 15.60 |
| 7c00332 | -1.48 | 14.89 | um10398 | 0.27  | 11.87 |
| 7c00333 | 0.23  | 9.29  | um10399 | 0.40  | 12.13 |
| 7c00334 | 0.16  | 12.28 | um10400 | -0.08 | 13.10 |
| 7c00335 | 0.42  | 12.17 | um10401 | -0.07 | 10.80 |
| 7c00336 | 0.15  | 12.03 | um10402 | 0.42  | 10.95 |
| 7c00337 | 0.04  | 10.57 | um10403 | -0.25 | 9.03  |
| 7c00338 | -0.34 | 14.11 | um10405 | 0.43  | 10.99 |
| 7c00339 | 0.14  | 12.08 | um10406 | 0.53  | 11.15 |

|         |       |       |         |       |       |
|---------|-------|-------|---------|-------|-------|
| 7c00340 | 0.01  | 8.95  | um10407 | 0.89  | 11.16 |
| 7c00341 | 0.02  | 8.73  | um10408 | 0.09  | 11.08 |
| 7c00342 | -0.10 | 11.86 | um10410 | 0.13  | 10.95 |
| 7c00343 | -0.85 | 14.11 | um10412 | 0.47  | 12.18 |
| 7c00344 | 0.04  | 12.54 | um10413 | -1.07 | 9.20  |
| 7c00345 | 0.03  | 13.06 | um10414 | -0.82 | 11.73 |
| 7c00346 | -0.11 | 13.10 | um10415 | 0.27  | 11.52 |
| 7c00347 | 0.24  | 11.53 | um10416 | 0.09  | 10.91 |
| 7c00348 | 0.64  | 13.36 | um10417 | -0.56 | 11.82 |
| 7c00349 | 0.36  | 11.81 | um10418 | -0.33 | 8.59  |
| 7c00350 | 0.45  | 11.83 | um10419 | -2.53 | 11.92 |
| 7c00351 | 0.14  | 10.08 | um10420 | 0.93  | 10.75 |
| 7c00352 | 0.00  | 15.26 | um10421 | -0.17 | 11.81 |
| 7c00353 | -0.14 | 9.53  | um10422 | 0.01  | 11.29 |
| 7c00354 | 0.86  | 15.03 | um10423 | -0.06 | 12.34 |
| 7c00355 | 0.10  | 10.38 | um10424 | 0.04  | 12.62 |
| 7c00356 | 0.21  | 12.66 | um10425 | 0.08  | 11.70 |
| 7c00357 | 0.18  | 10.85 | um10426 | -0.40 | 13.01 |
| 7c00358 | 1.76  | 13.14 | um10428 | 0.15  | 12.39 |
| 7c00359 | 2.30  | 13.92 | um10429 | 0.00  | 12.78 |
| 7c00360 | 2.42  | 12.74 | um10430 | 0.32  | 11.36 |
| 7c00361 | 1.16  | 10.30 | um10431 | 0.13  | 12.03 |
| 7c00362 | 1.02  | 11.41 | um10432 | -0.05 | 9.68  |
| 7d00001 | -0.25 | 12.63 | um10433 | 0.33  | 12.76 |
| 7d00002 | -0.02 | 13.39 | um10434 | -0.13 | 15.31 |
| 7d00003 | -0.28 | 11.08 | um10435 | -0.35 | 12.49 |
| 7d00004 | 0.58  | 11.81 | um10436 | -0.50 | 11.14 |
| 7d00005 | 0.85  | 12.12 | um10437 | -0.02 | 11.87 |
| 7d00006 | 0.80  | 12.46 | um10438 | 0.01  | 11.13 |
| 7d00007 | -0.09 | 12.17 | um10439 | 0.86  | 11.85 |
| 7d00008 | -0.61 | 8.87  | um10440 | 0.54  | 12.49 |
| 7d00009 | 0.84  | 11.37 | um10441 | 0.03  | 14.77 |
| 7d00010 | 0.52  | 13.18 | um10442 | 0.00  | 11.50 |
| 7d00011 | 0.00  | 8.82  | um10443 | 1.32  | 11.26 |
| 7d00012 | -0.40 | 13.09 | um10444 | -2.43 | 13.19 |
| 7d00013 | -0.13 | 11.84 | um10445 | -0.57 | 12.44 |
| 7d00014 | -0.05 | 8.63  | um10446 | 0.73  | 11.18 |
| 7d00015 | -0.94 | 12.07 | um10447 | -0.31 | 12.86 |
| 7d00016 | -0.06 | 10.99 | um10448 | -0.12 | 12.60 |
| 7d00017 | -0.31 | 11.26 | um10449 | 0.52  | 12.06 |
| 7d00018 | -0.08 | 10.19 | um10450 | 0.70  | 10.39 |
| 7d00019 | 0.07  | 12.84 | um10451 | -0.33 | 11.82 |
| 7d00020 | -0.01 | 12.65 | um10452 | 0.97  | 11.18 |
| 7d00021 | -0.24 | 13.05 | um10456 | -0.43 | 11.35 |
| 7d00022 | -0.18 | 12.08 | um10457 | -0.22 | 12.46 |
| 7d00023 | 0.32  | 12.19 | um10459 | -0.09 | 12.79 |
| 7d00024 | 0.40  | 12.17 | um10461 | -0.30 | 11.91 |
| 7d00025 | -0.19 | 11.06 | um10462 | -0.39 | 12.53 |
| 7d00026 | -0.29 | 12.26 | um10463 | -0.40 | 11.11 |
| 7d00027 | -0.13 | 12.21 | um10464 | -1.76 | 11.30 |
| 7d00028 | -0.41 | 11.21 | um10465 | -0.18 | 11.88 |
| 7d00029 | -0.15 | 12.89 | um10466 | -0.65 | 12.90 |
| 7d00030 | 0.27  | 13.45 | um10467 | 0.51  | 11.39 |
| 7d00031 | 0.17  | 12.16 | um10468 | 0.09  | 12.15 |

|         |       |       |         |       |       |
|---------|-------|-------|---------|-------|-------|
| 7d00032 | -0.27 | 11.79 | um10469 | 0.56  | 14.73 |
| 7d00033 | -0.10 | 12.23 | um10470 | 1.08  | 13.34 |
| 7d00034 | 0.11  | 13.67 | um10471 | 0.65  | 10.06 |
| 7d00035 | 0.19  | 9.12  | um10472 | 0.06  | 13.39 |
| 7d00036 | 0.06  | 9.58  | um10473 | 0.87  | 11.86 |
| 7d00037 | 0.04  | 12.42 | um10474 | 0.56  | 11.72 |
| 7d00038 | 0.01  | 10.47 | um10475 | -0.18 | 12.80 |
| 7d00039 | 0.16  | 12.29 | um10476 | -0.61 | 14.87 |
| 7d00040 | -0.22 | 11.86 | um10477 | 0.29  | 11.63 |
| 7d00041 | -1.00 | 12.17 | um10478 | 0.31  | 13.19 |
| 7d00042 | -0.35 | 12.78 | um10479 | 0.18  | 13.49 |
| 7d00043 | -0.04 | 12.07 | um10480 | 1.03  | 12.97 |
| 7d00044 | -0.40 | 10.55 | um10481 | -0.58 | 11.63 |
| 7d00045 | 0.14  | 10.10 | um10482 | 0.24  | 11.16 |
| 7d00046 | -0.19 | 10.63 | um10483 | 1.69  | 11.47 |
| 7d00047 | -0.01 | 12.25 | um10484 | -0.20 | 13.50 |
| 7d00048 | -0.33 | 11.09 | um10485 | -0.14 | 13.66 |
| 7d00049 | -0.77 | 12.22 | um10486 | 0.07  | 10.27 |
| 7d00050 | -0.05 | 8.65  | um10487 | 0.19  | 9.09  |
| 7d00051 | -0.32 | 12.33 | um10488 | 0.15  | 11.53 |
| 7d00052 | -0.35 | 13.28 | um10489 | 0.56  | 12.82 |
| 7d00053 | -0.69 | 12.71 | um10490 | -1.05 | 12.39 |
| 7d00054 | -0.28 | 13.04 | um10491 | 0.21  | 10.80 |
| 7d00055 | -0.13 | 9.59  | um10492 | -0.28 | 11.31 |
| 7d00056 | 0.08  | 11.63 | um10493 | 0.22  | 13.19 |
| 7d00057 | 0.20  | 11.75 | um10494 | 0.34  | 12.92 |
| 7d00058 | -0.21 | 12.80 | um10495 | -0.57 | 10.91 |
| 7d00059 | 0.11  | 13.24 | um10496 | -0.37 | 8.68  |
| 7d00060 | -0.02 | 11.35 | um10497 | 0.57  | 10.96 |
| 7d00061 | -0.19 | 12.92 | um10498 | 0.00  | 12.25 |
| 7d00062 | -0.23 | 12.75 | um10499 | -0.06 | 14.51 |
| 7d00063 | 0.21  | 9.50  | um10500 | 0.77  | 11.68 |
| 7d00064 | -0.05 | 13.01 | um10501 | 0.74  | 14.36 |
| 7d00065 | -0.13 | 10.83 | um10502 | 0.16  | 10.59 |
| 7d00066 | -0.39 | 12.17 | um10503 | 0.87  | 12.43 |
| 7d00067 | -0.14 | 11.51 | um10504 | 0.15  | 11.61 |
| 7d00068 | 0.01  | 12.28 | um10505 | -0.09 | 13.55 |
| 7d00069 | 0.96  | 13.24 | um10506 | 0.14  | 12.34 |
| 7d00070 | 0.25  | 12.48 | um10507 | 0.64  | 11.54 |
| 7d00071 | 0.17  | 11.42 | um10508 | 0.71  | 12.42 |
| 7d00072 | 0.08  | 10.65 | um10509 | 2.00  | 11.64 |
| 7d00073 | -0.32 | 10.15 | um10510 | 1.39  | 14.34 |
| 7d00074 | 0.17  | 12.32 | um10511 | 0.75  | 12.08 |
| 7d00075 | 0.30  | 11.28 | um10512 | 1.02  | 10.74 |
| 7d00076 | 0.32  | 9.03  | um10513 | 0.21  | 12.01 |
| 7d00077 | 0.25  | 11.70 | um10514 | -0.32 | 12.49 |
| 7d00078 | -1.85 | 10.31 | um10515 | -0.53 | 12.46 |
| 7d00079 | 0.45  | 13.42 | um10516 | 0.26  | 9.23  |
| 7d00080 | -0.12 | 10.39 | um10517 | -0.10 | 14.19 |
| 7d00081 | -0.73 | 11.77 | um10518 | 0.51  | 11.40 |
| 7d00082 | 0.52  | 12.81 | um10519 | -0.71 | 9.67  |
| 7d00083 | -0.23 | 10.76 | um10520 | 0.77  | 15.20 |
| 7d00084 | 0.50  | 12.24 | um10521 | 0.53  | 9.81  |
| 7d00085 | 0.09  | 8.49  | um10522 | -0.07 | 11.41 |



|         |       |       |         |       |       |
|---------|-------|-------|---------|-------|-------|
| 7d00086 | -0.07 | 8.88  | um10532 | -0.24 | 12.24 |
| 7d00087 | -0.06 | 8.83  | um10533 | -0.04 | 12.98 |
| 7d00088 | -0.39 | 11.11 | um10534 | 0.71  | 12.18 |
| 7d00089 | -0.22 | 12.25 | um10535 | 0.23  | 11.47 |
| 7d00090 | -0.45 | 11.93 | um10536 | 0.25  | 14.61 |
| 7d00091 | 0.03  | 12.31 | um10538 | 0.13  | 12.40 |
| 7d00092 | -0.20 | 11.05 | um10539 | 0.50  | 11.08 |
| 7d00093 | 0.55  | 13.56 | um10540 | 1.48  | 13.53 |
| 7d00094 | -1.69 | 12.65 | um10541 | 0.49  | 11.19 |
| 7d00095 | -0.58 | 12.96 | um10543 | -0.02 | 8.41  |
| 7d00096 | -0.20 | 12.73 | um10544 | -0.63 | 13.09 |
| 7d00097 | -1.11 | 12.73 | um10545 | -1.93 | 11.95 |
| 7d00098 | -0.88 | 13.17 | um10546 | -0.31 | 11.31 |
| 7d00099 | -0.47 | 14.15 | um10548 | -0.22 | 15.45 |
| 7d00100 | -0.68 | 12.15 | um10549 | 0.20  | 11.05 |
| 7d00101 | -0.22 | 12.35 | um10551 | 0.04  | 11.97 |
| 7d00102 | -0.34 | 12.08 | um10552 | -0.26 | 12.13 |
| 7d00103 | 0.03  | 12.01 | um10553 | -0.31 | 8.87  |
| 7d00104 | 0.04  | 9.78  | um10554 | -0.35 | 8.57  |
| 7d00105 | 0.30  | 12.88 | um10555 | -0.18 | 8.79  |
| 7d00106 | -0.27 | 9.70  | um10556 | -0.14 | 8.50  |
| 7d00107 | -0.12 | 13.10 | um10557 | -0.67 | 8.92  |
| 7d00108 | 0.12  | 9.33  | um10558 | -0.12 | 13.25 |
| 7d00109 | 0.10  | 11.22 | um10559 | -1.02 | 12.37 |
| 7d00110 | 0.02  | 12.17 | um10560 | 0.91  | 11.11 |
| 7d00111 | -0.04 | 12.03 | um10561 | -0.42 | 12.54 |
| 7d00112 | -0.08 | 12.32 | um10565 | -0.37 | 9.67  |
| 7d00113 | -0.07 | 13.96 | um10566 | 0.05  | 11.84 |
| 7d00114 | 0.31  | 12.03 | um10568 | 0.02  | 12.51 |
| 7d00115 | 0.18  | 10.09 | um10569 | -0.36 | 12.35 |
| 7d00116 | 0.14  | 13.39 | um10570 | 0.48  | 11.09 |
| 7d00117 | 0.49  | 10.12 | um10571 | 0.15  | 11.60 |
| 7d00118 | -0.38 | 14.65 | um10573 | 0.37  | 14.83 |
| 7d00119 | -0.62 | 12.42 | um10574 | -0.39 | 11.94 |
| 7d00120 | 0.03  | 12.02 | um10575 | 0.82  | 11.54 |
| 7d00121 | -0.27 | 11.38 | um10576 | 0.63  | 10.73 |
| 7d00122 | -0.37 | 11.36 | um10577 | 0.26  | 12.25 |
| 7d00123 | 0.28  | 11.31 | um10578 | 0.23  | 10.55 |
| 7d00124 | 0.07  | 12.78 | um10579 | 0.23  | 11.53 |
| 7d00125 | -0.02 | 12.63 | um10581 | 3.45  | 11.97 |
| 7d00126 | 0.00  | 15.84 | um10582 | -0.03 | 13.05 |
| 7d00127 | -0.41 | 10.78 | um10583 | -0.51 | 9.73  |
| 7d00128 | 0.09  | 10.48 | um10585 | 1.01  | 14.17 |
| 7d00129 | 0.58  | 13.12 | um10586 | -0.17 | 13.74 |
| 7d00130 | -0.09 | 11.07 | um10587 | -1.67 | 13.43 |
| 7d00131 | 0.05  | 12.88 | um10588 | 0.48  | 12.16 |
| 7d00132 | 0.55  | 12.87 | um10589 | -1.34 | 11.72 |
| 7d00133 | 0.41  | 10.55 | um10590 | 2.63  | 12.02 |
| 7d00134 | 0.25  | 13.42 | um10591 | -0.07 | 11.42 |
| 7d00135 | -0.40 | 14.42 | um10593 | 0.40  | 10.73 |
| 7d00136 | -0.36 | 12.46 | um10594 | 0.00  | 11.16 |
| 7d00137 | 0.25  | 11.94 | um10595 | -0.12 | 11.21 |
| 7d00138 | -0.21 | 11.81 | um10596 | -0.05 | 13.48 |
| 7d00139 | 0.14  | 9.12  | um10597 | -0.13 | 11.22 |

|         |       |       |         |       |       |
|---------|-------|-------|---------|-------|-------|
| 7d00140 | 0.01  | 9.03  | um10598 | -0.46 | 14.81 |
| 7d00141 | 0.03  | 12.14 | um10599 | 0.73  | 13.60 |
| 7d00142 | -0.48 | 12.68 | um10600 | -0.12 | 10.21 |
| 7d00143 | 1.07  | 13.15 | um10601 | 0.05  | 10.88 |
| 7d00144 | 0.39  | 13.09 | um10602 | -0.29 | 11.69 |
| 7d00145 | -0.34 | 11.56 | um10603 | 2.08  | 13.27 |
| 7d00146 | -0.01 | 13.41 | um10604 | -0.77 | 11.26 |
| 7d00147 | 0.09  | 11.79 | um10605 | -0.11 | 15.17 |
| 7d00148 | 0.22  | 8.82  | um10606 | 3.00  | 11.26 |
| 7d00149 | -0.21 | 12.57 | um10607 | 0.13  | 9.65  |
| 7d00150 | -0.02 | 8.58  | um10608 | -0.77 | 13.32 |
| 7d00151 | -0.03 | 8.42  | um10609 | 0.10  | 12.71 |
| 7d00152 | 0.18  | 14.43 | um10610 | -0.26 | 10.78 |
| 7d00153 | -0.07 | 15.24 | um10611 | 0.05  | 13.99 |
| 7d00154 | 0.46  | 12.16 | um10612 | -0.72 | 11.40 |
| 7d00155 | 0.44  | 11.35 | um10613 | -0.16 | 12.82 |
| 7d00156 | 0.48  | 13.43 | um10614 | 1.17  | 11.76 |
| 7d00157 | 0.52  | 12.07 | um10615 | 0.66  | 11.22 |
| 7d00158 | -0.49 | 13.18 | um10616 | 0.10  | 14.62 |
| 7d00159 | 0.10  | 11.49 | um10617 | 0.79  | 10.97 |
| 7d00160 | -0.02 | 13.53 | um10618 | -0.13 | 11.54 |
| 7d00161 | 0.11  | 12.00 | um10619 | -0.27 | 12.11 |
| 7d00162 | 0.20  | 10.01 | um10620 | 0.09  | 15.45 |
| 7d00163 | 0.34  | 11.42 | um10621 | -0.02 | 13.43 |
| 7d00164 | 0.28  | 13.24 | um10622 | 0.13  | 12.66 |
| 7d00165 | 0.92  | 14.79 | um10623 | 0.05  | 14.67 |
| 7d00166 | -0.02 | 11.48 | um10624 | -0.02 | 13.44 |
| 7d00167 | -0.19 | 9.11  | um10625 | 0.26  | 10.18 |
| 7d00168 | -0.75 | 14.82 | um10626 | 1.24  | 12.42 |
| 7d00169 | -0.61 | 11.97 | um10627 | -6.75 | 12.38 |
| 7d00170 | 0.04  | 11.48 | um10628 | -0.58 | 9.00  |
| 7d00171 | -0.22 | 11.75 | um10629 | -0.39 | 10.62 |
| 7d00172 | -0.02 | 12.74 | um10630 | -0.57 | 8.77  |
| 7d00173 | 0.35  | 13.20 | um10631 | 0.68  | 12.08 |
| 7d00174 | 0.20  | 12.91 | um10632 | -0.85 | 9.76  |
| 7d00175 | 0.71  | 13.73 | um10633 | 0.13  | 11.44 |
| 7d00176 | 0.42  | 11.92 | um10634 | 0.29  | 11.26 |
| 7d00177 | 0.46  | 11.37 | um10635 | -0.73 | 11.80 |
| 7d00178 | -2.68 | 12.30 | um10636 | 0.62  | 11.23 |
| 7d00179 | -0.19 | 10.01 | um10637 | -0.13 | 12.20 |
| 7d00180 | 0.56  | 13.04 | um10638 | -0.28 | 14.61 |
| 7d00181 | -0.07 | 12.43 | um10639 | 0.10  | 10.83 |
| 7d00182 | 0.21  | 11.99 | um10640 | 0.41  | 12.88 |
| 7d00183 | 1.40  | 13.96 | um10641 | 0.07  | 13.12 |
| 7d00184 | 0.06  | 8.63  | um10642 | -0.80 | 12.10 |
| 7d00185 | -0.20 | 10.39 | um10643 | -0.57 | 12.58 |
| 7d00186 | -0.15 | 15.88 | um10644 | -0.12 | 12.08 |
| 7d00187 | 0.21  | 12.48 | um10645 | -0.15 | 11.96 |
| 7d00188 | -0.27 | 14.32 | um10646 | 0.43  | 11.98 |
| 7d00189 | 0.07  | 13.33 | um10647 | 0.20  | 11.67 |
| 7d00190 | -0.28 | 12.77 | um10648 | 0.49  | 12.88 |
| 7d00191 | -0.10 | 8.79  | um10649 | 0.22  | 12.40 |
| 7d00192 | 0.29  | 11.93 | um10650 | -0.51 | 10.32 |
| 7d00193 | -0.10 | 8.68  | um10651 | 0.60  | 12.44 |

|         |       |       |         |       |       |
|---------|-------|-------|---------|-------|-------|
| 7d00194 | 0.03  | 11.79 | um10658 | 0.09  | 12.16 |
| 7d00195 | 0.43  | 12.78 | um10659 | -0.62 | 12.96 |
| 7d00196 | -0.42 | 11.97 | um10661 | -0.07 | 10.56 |
| 7d00197 | -0.02 | 10.06 | um10662 | 0.21  | 11.16 |
| 7d00198 | -0.48 | 12.64 | um10663 | -0.36 | 11.86 |
| 7d00199 | -0.33 | 14.54 | um10664 | 1.07  | 12.21 |
| 7d00200 | -0.69 | 11.41 | um10665 | 1.18  | 12.26 |
| 7d00201 | -0.62 | 12.98 | um10666 | 0.52  | 10.82 |
| 7d00202 | -0.13 | 11.90 | um10667 | 0.00  | 12.74 |
| 7d00203 | 0.67  | 11.06 | um10668 | 0.05  | 11.21 |
| 7d00204 | 0.03  | 12.99 | um10669 | 0.00  | 11.10 |
| 7d00205 | 0.52  | 11.65 | um10671 | 0.43  | 12.97 |
| 7d00206 | 0.89  | 13.09 | um10672 | -0.50 | 9.71  |
| 7d00207 | -0.01 | 8.69  | um10673 | -0.65 | 12.42 |
| 7d00208 | 0.03  | 11.23 | um10674 | 0.16  | 11.84 |
| 7d00209 | -0.05 | 12.90 | um10675 | -0.42 | 13.63 |
| 7d00210 | 0.06  | 11.51 | um10676 | 1.01  | 15.05 |
| 7d00211 | -0.07 | 11.97 | um10678 | -0.55 | 9.85  |
| 7d00212 | -0.09 | 12.88 | um10679 | 2.41  | 12.48 |
| 7d00213 | 0.05  | 12.90 | um10680 | -0.32 | 11.02 |
| 7d00214 | 0.07  | 8.66  | um10681 | 0.05  | 14.01 |
| 7d00215 | 0.53  | 13.23 | um10682 | 1.67  | 11.85 |
| 7d00216 | 0.70  | 10.50 | um10683 | 0.43  | 10.77 |
| 7d00217 | 0.13  | 13.03 | um10684 | 0.46  | 10.91 |
| 7d00218 | -0.31 | 12.86 | um10685 | 0.68  | 12.91 |
| 7d00219 | -0.55 | 12.84 | um10686 | 0.42  | 11.55 |
| 7d00220 | -0.12 | 9.87  | um10687 | 0.09  | 12.37 |
| 7d00221 | -0.82 | 11.17 | um10688 | -0.88 | 11.10 |
| 7d00222 | 0.28  | 12.65 | um10689 | 0.24  | 11.43 |
| 7d00223 | -0.02 | 13.22 | um10690 | 0.87  | 9.34  |
| 7d00224 | 0.07  | 10.33 | um10691 | 1.67  | 11.70 |
| 7d00225 | 0.21  | 11.19 | um10692 | 0.98  | 10.03 |
| 7d00226 | 0.12  | 13.08 | um10693 | 0.47  | 11.52 |
| 7d00227 | 0.42  | 14.25 | um10694 | -0.10 | 10.82 |
| 7d00228 | -0.15 | 13.36 | um10695 | 0.84  | 13.38 |
| 7d00229 | 0.42  | 12.90 | um10696 | -0.35 | 12.23 |
| 7d00230 | -0.20 | 12.35 | um10697 | 0.01  | 9.06  |
| 7d00231 | -0.03 | 13.40 | um10698 | 0.68  | 11.50 |
| 7d00232 | -0.28 | 9.94  | um10699 | -0.93 | 12.66 |
| 7d00233 | -0.24 | 14.16 | um10700 | -0.04 | 14.64 |
| 7d00234 | 0.56  | 13.39 | um10701 | 0.31  | 14.45 |
| 7d00235 | 0.36  | 10.59 | um10702 | 0.14  | 14.97 |
| 7d00236 | -0.02 | 13.32 | um10703 | -0.74 | 11.73 |
| 7d00237 | -0.49 | 14.69 | um10704 | 0.06  | 12.22 |
| 7d00238 | 0.68  | 10.87 | um10705 | -1.02 | 11.84 |
| 7d00239 | 0.05  | 9.58  | um10707 | 0.24  | 11.81 |
| 7d00240 | -0.55 | 10.13 | um10708 | -0.14 | 13.58 |
| 7d00241 | 0.16  | 13.05 | um10709 | 0.06  | 10.74 |
| 7d00242 | 0.05  | 12.00 | um10711 | 0.30  | 14.90 |
| 7d00243 | -0.16 | 12.65 | um10712 | -0.48 | 12.46 |
| 7d00244 | -0.43 | 15.50 | um10713 | 0.31  | 11.20 |
| 7d00245 | 0.18  | 11.91 | um10714 | -0.03 | 14.26 |
| 7d00246 | -0.52 | 12.84 | um10715 | -0.42 | 11.36 |
| 7d00247 | -0.11 | 8.76  | um10718 | -0.91 | 12.40 |

|         |       |       |         |       |       |
|---------|-------|-------|---------|-------|-------|
| 7d00248 | 0.92  | 13.75 | um10719 | 0.39  | 12.78 |
| 7d00249 | -0.06 | 12.27 | um10720 | 0.14  | 12.03 |
| 7d00250 | 0.44  | 14.51 | um10721 | 1.10  | 11.66 |
| 7d00251 | -0.47 | 11.41 | um10722 | -0.03 | 11.89 |
| 7d00252 | -0.12 | 11.11 | um10723 | 0.05  | 13.85 |
| 7d00253 | 0.05  | 8.68  | um10724 | -0.17 | 12.07 |
| 7d00254 | 0.56  | 14.33 | um10725 | 0.45  | 11.15 |
| 7d00255 | -0.46 | 10.01 | um10726 | -0.14 | 13.26 |
| 7d00256 | -0.19 | 10.59 | um10727 | -0.23 | 11.46 |
| 7d00257 | -1.51 | 14.85 | um10728 | 0.02  | 10.46 |
| 7d00258 | 0.56  | 13.54 | um10729 | -0.08 | 11.54 |
| 7d00259 | -0.14 | 12.10 | um10730 | -0.64 | 11.11 |
| 7d00260 | 0.28  | 11.61 | um10731 | 0.06  | 12.89 |
| 7d00261 | -0.39 | 11.95 | um10732 | -0.28 | 12.02 |
| 7d00262 | -0.15 | 11.62 | um10733 | 0.79  | 13.22 |
| 7d00263 | -0.19 | 11.46 | um10735 | 0.08  | 11.51 |
| 7d00264 | -0.46 | 13.46 | um10737 | 0.06  | 10.89 |
| 7d00265 | -0.32 | 11.19 | um10738 | 0.71  | 11.78 |
| 7d00266 | -0.41 | 13.17 | um10739 | -0.01 | 8.71  |
| 7d00267 | -0.29 | 12.15 | um10740 | -0.31 | 12.61 |
| 7d00268 | 0.05  | 12.82 | um10741 | -0.07 | 12.18 |
| 7d00269 | -0.08 | 12.16 | um10742 | -0.34 | 14.62 |
| 7d00270 | -0.26 | 12.25 | um10746 | 0.87  | 12.55 |
| 7d00271 | 0.00  | 9.86  | um10747 | 0.10  | 11.32 |
| 7d00272 | -0.21 | 12.08 | um10748 | 0.08  | 11.76 |
| 7d00273 | -0.16 | 11.26 | um10749 | -0.44 | 12.08 |
| 7d00274 | -0.26 | 11.61 | um10750 | 0.12  | 11.62 |
| 7d00275 | -0.61 | 12.54 | um10751 | 0.42  | 13.17 |
| 7d00276 | -1.24 | 12.53 | um10752 | 0.83  | 13.12 |
| 7d00277 | -1.41 | 12.43 | um10753 | -1.07 | 15.29 |
| 7d00278 | -0.40 | 11.45 | um10754 | -0.11 | 14.73 |
| 7d00279 | -0.08 | 11.56 | um10755 | -0.54 | 13.23 |
| 7d00280 | 0.36  | 12.80 | um10756 | -0.12 | 9.16  |
| 7d00281 | 0.18  | 12.56 | um10757 | 0.73  | 12.40 |
| 7d00282 | 0.63  | 11.70 | um10758 | 0.13  | 10.90 |
| 7d00283 | -0.11 | 9.80  | um10759 | -0.51 | 9.59  |
| 7d00284 | 0.07  | 11.86 | um10760 | 0.26  | 13.58 |
| 7d00285 | -0.10 | 14.25 | um10761 | 0.07  | 12.01 |
| 7d00286 | -0.39 | 10.69 | um10763 | 0.09  | 12.49 |
| 7d00287 | -0.05 | 11.70 | um10764 | 0.28  | 11.87 |
| 7d00288 | 1.19  | 11.63 | um10765 | 0.24  | 12.56 |
| 7d00289 | 0.34  | 12.82 | um10766 | -0.28 | 12.95 |
| 7d00290 | 0.09  | 13.21 | um10767 | -0.08 | 10.89 |
| 7d00291 | 0.09  | 11.77 | um10768 | -0.15 | 10.61 |
| 7d00292 | -0.29 | 15.78 | um10769 | -0.05 | 13.06 |
| 7d00293 | 0.09  | 12.32 | um10770 | -0.33 | 12.36 |
| 7d00294 | -0.02 | 14.87 | um10771 | -0.06 | 12.67 |
| 7d00295 | -3.82 | 12.59 | um10772 | -0.35 | 13.30 |
| 7d00296 | -0.24 | 11.23 | um10773 | -0.07 | 13.42 |
| 7d00297 | -0.13 | 9.67  | um10774 | -0.11 | 10.02 |
| 7d00298 | 0.03  | 11.68 | um10775 | -0.14 | 11.07 |
| 7d00299 | -0.27 | 12.82 | um10776 | -0.10 | 12.31 |
| 7d00300 | 0.03  | 12.66 | um10777 | -0.36 | 15.47 |
| 7d00301 | -0.24 | 14.87 | um10778 | -0.47 | 11.84 |

|         |       |       |         |       |       |
|---------|-------|-------|---------|-------|-------|
| 7d00302 | 0.30  | 12.57 | um10779 | -0.21 | 12.65 |
| 7d00303 | 0.34  | 14.09 | um10780 | -0.32 | 14.05 |
| 7d00304 | 0.42  | 12.75 | um10781 | -0.79 | 12.66 |
| 7d00305 | -0.51 | 12.74 | um10782 | -1.10 | 11.34 |
| 7d00306 | 0.20  | 11.51 | um10783 | 0.79  | 13.88 |
| 7d00307 | 0.21  | 10.99 | um10784 | -0.31 | 11.75 |
| 7d00308 | 0.48  | 10.52 | um10785 | 0.21  | 11.85 |
| 7d00309 | 0.16  | 13.77 | um10787 | -0.02 | 14.02 |
| 7d00310 | -0.18 | 10.21 | um10788 | -0.67 | 12.74 |
| 7d00311 | -0.97 | 13.62 | um10789 | 2.64  | 14.01 |
| 7d00312 | -0.15 | 9.84  | um10790 | 0.95  | 13.07 |
| 7d00313 | 0.08  | 11.37 | um10791 | 2.33  | 12.78 |
| 7d00314 | 0.23  | 11.46 | um10792 | 0.19  | 12.53 |
| 7d00315 | 0.03  | 8.55  | um10793 | 0.17  | 11.36 |
| 7d00316 | -0.58 | 12.00 | um10794 | -0.25 | 12.51 |
| 7d00317 | 0.02  | 15.99 | um10795 | -0.13 | 11.58 |
| 7d00318 | -0.08 | 8.56  | um10796 | 0.40  | 11.62 |
| 7d00319 | 0.58  | 12.71 | um10797 | 0.57  | 11.82 |
| 7d00320 | -0.56 | 11.33 | um10799 | 0.18  | 11.73 |
| 7d00321 | -0.37 | 10.76 | um10800 | -0.14 | 12.19 |
| 7d00322 | -0.20 | 13.15 | um10801 | 0.98  | 12.71 |
| 7d00323 | -0.03 | 13.05 | um10803 | 0.07  | 11.74 |
| 7d00324 | 0.01  | 10.40 | um10804 | 0.22  | 14.27 |
| 7d00325 | 0.32  | 12.91 | um10805 | -0.05 | 12.79 |
| 7d00326 | -0.47 | 11.59 | um10806 | 0.44  | 11.55 |
| 7d00327 | -0.26 | 13.85 | um10807 | -0.05 | 12.28 |
| 7d00328 | -0.30 | 11.69 | um10808 | 0.23  | 13.29 |
| 7d00329 | 0.01  | 13.90 | um10809 | -0.11 | 11.15 |
| 7d00330 | 0.22  | 12.28 | um10810 | -0.21 | 13.36 |
| 7d00331 | -0.01 | 13.09 | um10811 | -0.13 | 12.39 |
| 7d00332 | -0.48 | 11.52 | um10812 | -0.03 | 12.21 |
| 7d00333 | 0.18  | 9.81  | um10813 | -0.22 | 11.36 |
| 7d00334 | 0.37  | 11.90 | um10814 | -0.51 | 11.47 |
| 7d00335 | 0.11  | 13.15 | um10815 | -1.46 | 10.70 |
| 7d00336 | 0.30  | 12.57 | um10816 | -2.05 | 12.60 |
| 7d00337 | 0.25  | 11.81 | um10817 | 0.42  | 11.08 |
| 7d00338 | -0.33 | 12.18 | um10820 | -0.13 | 13.13 |
| 7d00339 | -0.03 | 9.59  | um10821 | -0.09 | 11.22 |
| 7d00340 | 0.01  | 11.16 | um10822 | 0.07  | 12.21 |
| 7d00341 | -0.32 | 13.41 | um10823 | -0.59 | 12.95 |
| 7d00342 | 0.03  | 12.60 | um10824 | -0.02 | 11.41 |
| 7d00343 | 0.17  | 10.76 | um10825 | 0.10  | 12.50 |
| 7d00344 | -0.12 | 13.48 | um10826 | 0.35  | 11.86 |
| 7d00345 | 0.02  | 12.08 | um10827 | -0.19 | 10.78 |
| 7d00346 | -0.89 | 10.41 | um10830 | 0.26  | 11.22 |
| 7d00347 | 0.02  | 13.66 | um10831 | -0.06 | 12.00 |
| 7d00348 | -0.24 | 11.34 | um10832 | -0.27 | 14.78 |
| 7d00349 | 0.31  | 9.30  | um10833 | 0.08  | 10.98 |
| 7d00350 | -0.15 | 11.70 | um10835 | 0.91  | 12.91 |
| 7d00351 | -0.04 | 12.54 | um10836 | -0.54 | 12.04 |
| 7d00352 | -0.39 | 9.42  | um10837 | 0.04  | 11.01 |
| 7d00353 | 0.05  | 10.71 | um10838 | 0.41  | 12.06 |
| 7d00354 | 0.24  | 10.29 | um10839 | -0.13 | 13.80 |
| 7d00355 | -0.83 | 12.09 | um10840 | -0.50 | 12.68 |

|         |       |       |         |       |       |
|---------|-------|-------|---------|-------|-------|
| 7d00356 | 0.21  | 12.09 | um10841 | 0.19  | 15.04 |
| 7d00357 | 0.06  | 12.08 | um10842 | -0.07 | 15.41 |
| 7d00358 | 0.25  | 12.08 | um10843 | 0.20  | 12.31 |
| 7d00359 | 0.89  | 13.13 | um10844 | 0.40  | 13.13 |
| 89d0000 | 0.17  | 13.69 | um10845 | -0.31 | 10.85 |
| 8c00001 | -0.41 | 9.43  | um10846 | 0.33  | 10.79 |
| 8c00002 | -0.91 | 10.10 | um10847 | 0.45  | 13.88 |
| 8c00003 | -1.17 | 11.39 | um10848 | 0.45  | 10.87 |
| 8c00004 | -0.41 | 9.66  | um10849 | 0.66  | 11.62 |
| 8c00005 | 0.00  | 10.03 | um10850 | -0.32 | 11.61 |
| 8c00006 | 0.21  | 11.48 | um10851 | 0.74  | 13.07 |
| 8c00007 | -1.02 | 10.67 | um10852 | -0.39 | 11.87 |
| 8c00008 | -0.15 | 11.26 | um10853 | -0.19 | 8.77  |
| 8c00009 | -0.44 | 13.56 | um10854 | -0.27 | 11.44 |
| 8c00010 | 0.45  | 13.07 | um10855 | 0.27  | 12.05 |
| 8c00011 | 0.02  | 9.66  | um10856 | 0.13  | 11.89 |
| 8c00012 | -0.13 | 13.50 | um10858 | -0.44 | 11.77 |
| 8c00013 | -0.27 | 11.22 | um10859 | 0.23  | 14.85 |
| 8c00014 | -0.39 | 12.63 | um10861 | 1.45  | 12.52 |
| 8c00015 | -0.05 | 11.59 | um10862 | 0.39  | 11.75 |
| 8c00016 | 0.54  | 12.74 | um10863 | -0.12 | 11.30 |
| 8c00017 | -0.29 | 8.97  | um10864 | 2.04  | 11.83 |
| 8c00018 | 0.06  | 11.80 | um10865 | 0.39  | 9.81  |
| 8c00019 | -0.16 | 11.19 | um10867 | -0.06 | 11.01 |
| 8c00020 | 0.01  | 12.53 | um10868 | 0.27  | 11.75 |
| 8c00021 | -0.32 | 13.94 | um10869 | 0.99  | 10.14 |
| 8c00022 | -0.76 | 14.80 | um10870 | -0.53 | 13.13 |
| 8c00023 | -0.43 | 10.55 | um10871 | 0.73  | 13.25 |
| 8c00024 | 0.43  | 13.22 | um10872 | 0.06  | 11.93 |
| 8c00025 | 0.03  | 8.80  | um10873 | 0.35  | 11.44 |
| 8c00026 | 0.16  | 8.73  | um10874 | 0.12  | 11.17 |
| 8c00027 | 0.26  | 12.35 | um10875 | 0.53  | 14.23 |
| 8c00028 | -0.06 | 12.19 | um10876 | -0.20 | 12.61 |
| 8c00029 | 0.06  | 11.51 | um10878 | -0.25 | 11.93 |
| 8c00030 | 0.27  | 14.46 | um10879 | -0.39 | 13.31 |
| 8c00031 | 0.28  | 11.80 | um10880 | 0.48  | 10.42 |
| 8c00032 | -0.48 | 11.87 | um10881 | 0.34  | 11.37 |
| 8c00033 | 0.34  | 11.73 | um10882 | 0.34  | 12.02 |
| 8c00034 | -0.56 | 12.53 | um10884 | 0.20  | 12.12 |
| 8c00035 | -0.02 | 12.06 | um10885 | -0.39 | 10.42 |
| 8c00036 | 0.23  | 11.87 | um10886 | -0.41 | 11.52 |
| 8c00037 | 0.26  | 12.62 | um10888 | -1.36 | 12.20 |
| 8c00038 | 0.43  | 9.89  | um10889 | 0.43  | 11.89 |
| 8c00039 | 0.13  | 11.40 | um10892 | -0.44 | 11.44 |
| 8c00040 | 1.35  | 13.39 | um10893 | 0.64  | 11.44 |
| 8c00041 | 0.07  | 12.00 | um10895 | -0.21 | 11.94 |
| 8c00042 | 0.42  | 11.63 | um10896 | -0.13 | 12.96 |
| 8c00043 | -0.29 | 13.95 | um10897 | 2.15  | 12.41 |
| 8c00044 | 0.49  | 12.46 | um10898 | -0.99 | 14.81 |
| 8c00045 | 0.57  | 13.69 | um10901 | 0.04  | 14.89 |
| 8c00046 | -0.13 | 9.90  | um10902 | 0.14  | 11.41 |
| 8c00047 | 0.11  | 12.57 | um10903 | 0.07  | 12.78 |
| 8c00048 | -0.03 | 12.23 | um10904 | -1.33 | 12.95 |
| 8c00049 | 0.07  | 12.86 | um10905 | 1.00  | 12.80 |

|         |       |       |         |       |       |
|---------|-------|-------|---------|-------|-------|
| 8c00050 | 0.27  | 13.69 | um10906 | -0.18 | 12.72 |
| 8c00051 | 0.58  | 12.46 | um10907 | -0.39 | 13.09 |
| 8c00052 | -0.31 | 12.22 | um10908 | 0.23  | 11.20 |
| 8c00053 | 0.02  | 11.29 | um10909 | 0.13  | 11.21 |
| 8c00054 | 0.42  | 13.17 | um10910 | -0.75 | 11.66 |
| 8c00055 | -0.18 | 11.61 | um10911 | 0.04  | 12.44 |
| 8c00056 | 0.01  | 12.61 | um10912 | 1.13  | 11.72 |
| 8c00057 | 0.43  | 13.92 | um10913 | -0.38 | 11.97 |
| 8c00058 | 0.33  | 11.78 | um10914 | 0.20  | 11.73 |
| 8c00059 | 0.61  | 10.98 | um10915 | 0.25  | 12.03 |
| 8c00060 | -0.19 | 10.82 | um10916 | -0.12 | 11.08 |
| 8c00061 | 0.09  | 12.32 | um10917 | 0.00  | 13.22 |
| 8c00062 | 0.02  | 9.87  | um10918 | -0.04 | 12.66 |
| 8c00063 | 0.38  | 9.57  | um10922 | 0.38  | 11.54 |
| 8c00064 | -0.38 | 12.94 | um10923 | -0.03 | 10.28 |
| 8c00065 | -0.21 | 12.62 | um10924 | 0.77  | 10.56 |
| 8c00066 | -0.20 | 10.18 | um10925 | 0.39  | 12.10 |
| 8c00067 | -0.53 | 14.76 | um10926 | -0.40 | 14.17 |
| 8c00068 | 0.34  | 14.69 | um10928 | -0.05 | 11.34 |
| 8c00069 | 0.20  | 13.71 | um10929 | 0.22  | 13.07 |
| 8c00070 | 0.50  | 12.89 | um10934 | 0.05  | 11.13 |
| 8c00071 | 0.18  | 14.96 | um10935 | 0.06  | 11.08 |
| 8c00072 | -0.02 | 12.07 | um10936 | 0.39  | 11.84 |
| 8c00073 | -1.05 | 13.35 | um10937 | 0.28  | 12.86 |
| 8c00074 | 0.20  | 14.22 | um10938 | 0.04  | 15.53 |
| 8c00075 | -0.10 | 12.62 | um10939 | 0.39  | 13.32 |
| 8c00076 | 0.56  | 13.87 | um10940 | -0.76 | 12.96 |
| 8c00077 | 0.27  | 13.37 | um10941 | 0.50  | 10.76 |
| 8c00078 | -0.27 | 11.75 | um10944 | 0.28  | 10.90 |
| 8c00079 | 0.98  | 13.20 | um10945 | 1.11  | 10.73 |
| 8c00080 | -0.28 | 13.11 | um10946 | 1.18  | 10.31 |
| 8c00081 | 0.09  | 12.32 | um10949 | -0.04 | 8.97  |
| 8c00082 | -0.83 | 11.54 | um10950 | 0.29  | 9.60  |
| 8c00083 | 0.13  | 12.92 | um10951 | -0.84 | 11.13 |
| 8c00084 | 0.02  | 8.87  | um10953 | -0.64 | 15.72 |
| 8c00085 | -0.09 | 8.77  | um10955 | 0.16  | 12.18 |
| 8c00086 | -0.22 | 13.46 | um10956 | -0.26 | 15.60 |
| 8c00087 | -1.68 | 13.94 | um10957 | -0.14 | 13.05 |
| 8c00088 | 0.06  | 12.45 | um10958 | -0.11 | 10.69 |
| 8c00089 | -0.07 | 12.33 | um10959 | 0.48  | 9.95  |
| 8c00090 | -0.51 | 13.01 | um10960 | -0.94 | 9.40  |
| 8c00091 | 0.16  | 12.93 | um10961 | -0.54 | 14.97 |
| 8c00092 | -0.02 | 10.80 | um10962 | 0.14  | 8.76  |
| 8c00093 | -0.06 | 10.35 | um10963 | 0.20  | 12.07 |
| 8c00094 | 0.26  | 11.77 | um10964 | -0.15 | 11.43 |
| 8c00095 | 0.01  | 13.04 | um10965 | 0.34  | 11.63 |
| 8c00096 | -0.30 | 13.33 | um10966 | 0.30  | 12.05 |
| 8c00097 | -0.39 | 12.29 | um10968 | -0.36 | 12.86 |
| 8c00098 | 0.00  | 9.56  | um10969 | -0.16 | 12.99 |
| 8c00099 | 0.04  | 8.71  | um10970 | -0.08 | 12.59 |
| 8c00100 | 0.01  | 11.85 | um10971 | 0.23  | 11.01 |
| 8c00101 | -0.57 | 11.55 | um10972 | -0.18 | 8.99  |
| 8c00102 | 0.41  | 10.47 | um10973 | 0.92  | 14.09 |
| 8c00103 | -0.14 | 11.87 | um10974 | -0.41 | 11.02 |

|         |       |       |         |       |       |
|---------|-------|-------|---------|-------|-------|
| 8c00104 | 0.01  | 10.53 | um10975 | -0.49 | 14.90 |
| 8c00105 | 0.36  | 12.72 | um10976 | -1.04 | 11.92 |
| 8c00106 | 0.13  | 11.35 | um10979 | 0.18  | 11.32 |
| 8c00107 | 0.24  | 12.95 | um10980 | 0.84  | 13.03 |
| 8c00108 | 0.46  | 13.00 | um10981 | -0.51 | 13.03 |
| 8c00109 | -0.49 | 13.04 | um10982 | 0.57  | 10.95 |
| 8c00110 | 0.38  | 12.34 | um10983 | 0.29  | 10.75 |
| 8c00111 | -0.20 | 13.29 | um10984 | -0.12 | 12.71 |
| 8c00112 | 0.36  | 9.84  | um10985 | -0.77 | 12.55 |
| 8c00113 | -0.07 | 9.46  | um10986 | 0.50  | 11.44 |
| 8c00114 | -0.44 | 13.05 | um10988 | 0.13  | 12.39 |
| 8c00115 | 0.20  | 12.49 | um10989 | 0.37  | 14.11 |
| 8c00116 | -0.33 | 13.15 | um10990 | 0.19  | 10.57 |
| 8c00117 | 0.17  | 13.49 | um10991 | -0.07 | 11.96 |
| 8c00118 | -0.11 | 10.49 | um10992 | 0.67  | 13.43 |
| 8c00119 | 0.90  | 12.88 | um10993 | -0.10 | 12.08 |
| 8c00120 | -0.84 | 11.61 | um10996 | -0.03 | 10.86 |
| 8c00121 | -0.18 | 11.83 | um10997 | 0.00  | 11.63 |
| 8c00122 | -0.61 | 10.11 | um10998 | -0.07 | 11.35 |
| 8c00123 | 0.45  | 15.37 | um10999 | 0.26  | 12.20 |
| 8c00124 | 0.37  | 10.76 | um11000 | -0.29 | 13.19 |
| 8c00125 | 0.44  | 14.31 | um11001 | -0.49 | 13.00 |
| 8c00126 | 0.05  | 8.98  | um11002 | 0.96  | 9.92  |
| 8c00127 | 0.15  | 8.86  | um11005 | 0.39  | 11.76 |
| 8c00128 | -0.02 | 8.87  | um11007 | 1.62  | 12.36 |
| 8c00129 | -0.17 | 9.63  | um11008 | 0.36  | 9.41  |
| 8c00130 | -0.24 | 11.87 | um11009 | -0.06 | 11.30 |
| 8c00131 | 0.22  | 11.39 | um11010 | 0.45  | 11.43 |
| 8d00001 | -0.89 | 11.62 | um11012 | -0.05 | 13.00 |
| 8d00002 | -0.85 | 10.65 | um11013 | -0.95 | 11.20 |
| 8d00003 | -0.04 | 8.76  | um11014 | -0.71 | 13.43 |
| 8d00004 | 0.23  | 12.93 | um11015 | 1.54  | 12.47 |
| 8d00005 | 0.09  | 10.47 | um11016 | -0.22 | 9.83  |
| 8d00006 | 0.35  | 11.12 | um11017 | 0.20  | 12.60 |
| 8d00007 | 0.31  | 12.02 | um11018 | 0.56  | 12.38 |
| 8d00008 | 0.82  | 11.46 | um11019 | 0.58  | 11.01 |
| 8d00009 | 0.05  | 9.20  | um11020 | 3.05  | 14.05 |
| 8d00010 | 0.92  | 12.92 | um11021 | -0.15 | 12.42 |
| 8d00011 | 0.01  | 11.26 | um11022 | -1.58 | 11.58 |
| 8d00012 | 0.15  | 13.87 | um11023 | -0.37 | 12.39 |
| 8d00013 | 0.36  | 11.41 | um11024 | 0.50  | 11.24 |
| 8d00014 | -0.52 | 13.93 | um11025 | 1.22  | 11.93 |
| 8d00015 | -0.24 | 13.86 | um11026 | 0.38  | 11.05 |
| 8d00016 | -0.07 | 9.94  | um11027 | 0.35  | 12.66 |
| 8d00017 | -0.05 | 12.54 | um11028 | 0.16  | 12.41 |
| 8d00018 | -0.25 | 13.48 | um11029 | 0.14  | 12.69 |
| 8d00019 | -0.88 | 10.39 | um11030 | -0.19 | 10.59 |
| 8d00020 | -0.34 | 13.38 | um11031 | 0.90  | 14.07 |
| 8d00021 | -0.59 | 10.95 | um11032 | 0.96  | 14.06 |
| 8d00022 | 0.01  | 8.83  | um11033 | 0.94  | 14.99 |
| 8d00023 | -0.18 | 12.44 | um11034 | 1.01  | 14.54 |
| 8d00024 | -0.62 | 12.23 | um11035 | 0.41  | 11.25 |
| 8d00025 | -0.10 | 8.95  | um11036 | 0.28  | 11.53 |
| 8d00026 | -0.04 | 8.62  | um11038 | 1.35  | 13.32 |



|         |       |       |         |       |       |
|---------|-------|-------|---------|-------|-------|
| 8d00027 | 0.06  | 8.64  | um11041 | 0.64  | 11.58 |
| 8d00028 | 0.23  | 12.78 | um11042 | 0.33  | 12.33 |
| 8d00029 | -2.78 | 12.90 | um11043 | 0.00  | 12.34 |
| 8d00030 | 0.10  | 12.52 | um11044 | 0.88  | 11.32 |
| 8d00031 | 0.33  | 11.38 | um11045 | -0.42 | 12.47 |
| 8d00032 | 0.05  | 13.66 | um11046 | -0.38 | 12.46 |
| 8d00033 | -0.03 | 8.59  | um11047 | -0.08 | 11.71 |
| 8d00034 | -0.50 | 13.17 | um11048 | -0.18 | 12.44 |
| 8d00035 | 0.59  | 12.82 | um11049 | 0.92  | 15.19 |
| 8d00036 | -0.21 | 12.07 | um11050 | -0.32 | 12.65 |
| 8d00037 | 0.28  | 14.35 | um11051 | 0.57  | 12.10 |
| 8d00038 | 0.01  | 9.16  | um11052 | -0.69 | 15.90 |
| 8d00039 | 0.50  | 12.62 | um11053 | 0.97  | 12.63 |
| 8d00040 | 0.25  | 11.20 | um11054 | 0.47  | 12.15 |
| 8d00041 | 0.13  | 11.68 | um11055 | -0.48 | 8.61  |
| 8d00042 | 0.27  | 13.47 | um11056 | -0.04 | 8.61  |
| 8d00043 | 0.15  | 10.97 | um11057 | 0.00  | 8.49  |
| 8d00044 | 3.15  | 14.17 | um11058 | -0.26 | 8.61  |
| 8d00045 | 0.39  | 9.47  | um11059 | -0.57 | 8.67  |
| 8d00046 | -0.05 | 10.65 | um11060 | -0.09 | 8.66  |
| 8d00047 | 0.01  | 8.62  | um11061 | -2.03 | 10.50 |
| 8d00048 | 0.06  | 9.57  | um11062 | 0.08  | 8.33  |
| 8d00049 | 0.22  | 9.11  | um11063 | -1.05 | 10.82 |
| 8d00050 | 0.37  | 12.23 | um11064 | -0.13 | 8.50  |
| 8d00051 | 0.16  | 12.44 | um11065 | 0.69  | 15.22 |
| 8d00052 | 0.31  | 10.42 | um11066 | 1.91  | 11.90 |
| 8d00053 | 0.99  | 11.70 | um11067 | 1.58  | 9.73  |
| 8d00054 | -0.90 | 11.81 | um11068 | -0.55 | 12.47 |
| 8d00055 | 0.43  | 12.36 | um11069 | -0.17 | 8.77  |
| 8d00056 | 0.08  | 13.14 | um11070 | 0.34  | 11.50 |
| 8d00057 | -0.11 | 13.66 | um11071 | -0.21 | 11.83 |
| 8d00058 | -0.01 | 12.90 | um11072 | -0.09 | 11.69 |
| 8d00059 | 0.07  | 10.94 | um11073 | 0.49  | 10.59 |
| 8d00060 | 0.02  | 12.68 | um11074 | 0.08  | 12.59 |
| 8d00061 | -0.08 | 10.85 | um11075 | 0.01  | 13.65 |
| 8d00062 | 0.27  | 11.36 | um11076 | 0.68  | 11.92 |
| 8d00063 | -0.50 | 11.77 | um11077 | 0.69  | 11.79 |
| 8d00064 | 0.09  | 10.65 | um11078 | 0.23  | 10.88 |
| 8d00065 | 0.07  | 9.13  | um11079 | -0.14 | 8.55  |
| 8d00066 | 0.47  | 10.78 | um11080 | -0.08 | 12.83 |
| 8d00067 | -0.28 | 12.46 | um11081 | 0.71  | 13.04 |
| 8d00068 | -0.24 | 14.51 | um11082 | -0.02 | 12.11 |
| 8d00069 | 0.12  | 10.44 | um11083 | 0.14  | 13.89 |
| 8d00070 | 0.53  | 12.30 | um11084 | -0.48 | 10.86 |
| 8d00071 | -0.59 | 12.55 | um11085 | -0.26 | 11.89 |
| 8d00072 | -0.17 | 13.10 | um11086 | -0.16 | 13.57 |
| 8d00073 | 0.77  | 10.37 | um11087 | -0.67 | 10.15 |
| 8d00074 | -0.01 | 8.73  | um11088 | 0.00  | 11.29 |
| 8d00075 | 0.06  | 9.61  | um11089 | 0.07  | 14.31 |
| 8d00076 | -0.34 | 11.24 | um11090 | -0.47 | 11.95 |
| 8d00077 | 0.20  | 11.92 | um11091 | -0.04 | 8.81  |
| 8d00078 | 0.54  | 10.51 | um11092 | -0.42 | 11.34 |
| 8d00079 | -0.05 | 8.94  | um11093 | -0.27 | 15.20 |
| 8d00080 | -0.10 | 9.06  | um11094 | 0.41  | 14.83 |

|         |       |       |         |       |       |
|---------|-------|-------|---------|-------|-------|
| 8d00081 | 0.05  | 9.89  | um11098 | -0.41 | 15.80 |
| 8d00082 | 0.20  | 11.58 | um11099 | -0.30 | 12.12 |
| 8d00083 | 0.39  | 13.02 | um11100 | 0.50  | 12.01 |
| 8d00084 | -0.06 | 12.56 | um11101 | -0.07 | 14.83 |
| 8d00085 | -0.06 | 12.87 | um11102 | 0.02  | 15.22 |
| 8d00086 | 0.33  | 13.64 | um11103 | -0.76 | 15.81 |
| 8d00087 | -0.32 | 12.72 | um11104 | 0.05  | 14.79 |
| 8d00088 | -0.15 | 12.90 | um11105 | -0.54 | 13.02 |
| 8d00089 | 0.30  | 14.15 | um11106 | -0.34 | 13.62 |
| 8d00090 | -0.21 | 12.41 | um11107 | -0.17 | 10.95 |
| 8d00091 | 0.32  | 14.87 | um11108 | -1.67 | 9.67  |
| 8d00092 | -0.07 | 8.66  | um11109 | -3.00 | 10.41 |
| 8d00093 | 0.03  | 11.84 | um11110 | -0.35 | 9.53  |
| 8d00094 | -0.16 | 11.84 | um11111 | 0.27  | 11.85 |
| 8d00095 | 0.21  | 12.31 | um11112 | -0.23 | 11.96 |
| 8d00096 | 0.10  | 12.20 | um11113 | 2.20  | 13.06 |
| 8d00097 | -0.16 | 12.48 | um11114 | 2.27  | 12.90 |
| 8d00098 | 0.45  | 13.34 | um11115 | 2.42  | 12.15 |
| 8d00099 | -0.23 | 13.47 | um11116 | -0.27 | 13.65 |
| 8d00100 | 0.22  | 12.01 | um11117 | -0.92 | 15.36 |
| 8d00101 | -0.07 | 12.80 | um11118 | -0.34 | 13.68 |
| 8d00102 | 0.08  | 10.94 | um11119 | 0.31  | 11.02 |
| 8d00103 | 0.02  | 14.66 | um11120 | 0.51  | 10.59 |
| 8d00104 | 0.04  | 12.13 | um11121 | -2.27 | 10.85 |
| 8d00105 | -0.62 | 13.05 | um11122 | -0.18 | 13.34 |
| 8d00106 | -0.01 | 12.60 | um11123 | 0.33  | 13.32 |
| 8d00107 | 0.02  | 12.16 | um11124 | 0.56  | 11.40 |
| 8d00108 | 0.12  | 11.47 | um11125 | 1.09  | 13.28 |
| 8d00109 | -1.52 | 14.73 | um11126 | -0.13 | 12.87 |
| 8d00110 | -0.25 | 11.82 | um11127 | -0.11 | 15.62 |
| 8d00111 | -0.99 | 9.43  | um11128 | 0.36  | 12.09 |
| 8d00112 | 0.80  | 12.53 | um11129 | 0.46  | 11.71 |
| 8d00113 | 0.03  | 10.52 | um11130 | -0.58 | 9.43  |
| 8d00114 | 0.02  | 8.89  | um11131 | -0.53 | 15.01 |
| 8d00115 | -0.16 | 8.90  | um11132 | -0.15 | 13.27 |
| 8d00116 | -0.37 | 10.99 | um11133 | -0.13 | 12.21 |
| 9c00001 | -0.02 | 15.68 | um11134 | -0.22 | 8.61  |
| 9c00002 | -0.26 | 11.70 | um11135 | -1.63 | 10.01 |
| 9c00003 | -0.52 | 12.66 | um11136 | 0.13  | 10.87 |
| 9c00004 | -0.07 | 8.76  | um11137 | 0.46  | 9.36  |
| 9c00005 | 2.15  | 11.67 | um11138 | 0.17  | 9.21  |
| 9c00006 | -0.06 | 11.93 | um11139 | -0.12 | 11.82 |
| 9c00007 | -0.58 | 12.78 | um11140 | 0.10  | 12.14 |
| 9c00008 | -0.15 | 14.14 | um11141 | 0.20  | 13.55 |
| 9c00009 | -0.01 | 13.65 | um11142 | -0.91 | 9.48  |
| 9c00010 | 0.03  | 11.89 | um11143 | -0.21 | 8.82  |
| 9c00011 | -0.47 | 12.30 | um11144 | 0.24  | 12.86 |
| 9c00012 | 0.41  | 10.70 | um11145 | -0.09 | 8.54  |
| 9c00013 | 0.13  | 8.56  | um11146 | 0.18  | 11.46 |
| 9c00014 | 0.11  | 12.20 | um11147 | -0.66 | 15.85 |
| 9c00015 | -0.33 | 10.71 | um11148 | 0.86  | 13.16 |
| 9c00016 | 0.23  | 12.88 | um11149 | 0.04  | 11.42 |
| 9c00017 | -0.85 | 12.63 | um11150 | 0.70  | 12.81 |
| 9c00018 | -0.10 | 11.54 | um11151 | 0.16  | 10.91 |

|         |       |       |         |       |       |
|---------|-------|-------|---------|-------|-------|
| 9c00019 | 0.04  | 12.94 | um11166 | -1.37 | 13.57 |
| 9c00020 | -0.30 | 10.92 | um11167 | -0.34 | 12.18 |
| 9c00021 | -0.18 | 10.42 | um11168 | 0.28  | 12.35 |
| 9c00022 | -0.31 | 12.21 | um11169 | -0.11 | 10.06 |
| 9c00023 | 0.13  | 10.21 | um11170 | 0.96  | 14.29 |
| 9c00024 | -0.01 | 11.02 | um11171 | 0.39  | 12.80 |
| 9c00025 | -0.27 | 14.15 | um11172 | -0.05 | 12.38 |
| 9c00026 | -0.46 | 11.41 | um11173 | -0.20 | 13.50 |
| 9c00027 | -0.25 | 12.25 | um11174 | 0.23  | 12.90 |
| 9c00028 | 0.04  | 9.88  | um11176 | 0.09  | 11.46 |
| 9c00029 | -0.01 | 13.03 | um11177 | -0.23 | 12.92 |
| 9c00030 | -0.41 | 13.27 | um11178 | 0.52  | 11.43 |
| 9c00031 | 1.20  | 11.66 | um11179 | 2.78  | 12.85 |
| 9c00032 | 0.05  | 10.58 | um11180 | 0.16  | 12.35 |
| 9c00033 | -0.39 | 12.54 | um11181 | -0.67 | 10.40 |
| 9c00034 | -0.38 | 14.45 | um11182 | -0.13 | 11.55 |
| 9c00035 | -0.14 | 13.60 | um11183 | -2.89 | 11.19 |
| 9c00036 | 0.52  | 12.14 | um11184 | -0.11 | 12.28 |
| 9c00037 | -0.25 | 9.24  | um11185 | 1.25  | 11.77 |
| 9c00038 | 0.05  | 9.64  | um11186 | 1.19  | 11.62 |
| 9c00039 | 0.06  | 11.60 | um11187 | -1.37 | 13.03 |
| 9c00040 | -0.23 | 10.34 | um11188 | -0.74 | 10.80 |
| 9c00041 | 0.00  | 8.83  | um11189 | 0.30  | 11.20 |
| 9c00042 | -0.17 | 12.81 | um11190 | 0.54  | 10.47 |
| 9c00043 | -0.02 | 9.35  | um11191 | 1.09  | 12.10 |
| 9c00044 | -1.19 | 13.77 | um11192 | 0.67  | 10.96 |
| 9c00045 | 0.03  | 8.73  | um11193 | 0.43  | 10.14 |
| 9c00046 | -0.16 | 11.59 | um11194 | 0.28  | 11.55 |
| 9c00047 | 0.28  | 13.27 | um11195 | -0.17 | 11.73 |
| 9c00048 | -0.16 | 11.71 | um11196 | -0.25 | 9.95  |
| 9c00049 | -0.10 | 12.75 | um11197 | 1.73  | 12.32 |
| 9c00050 | -0.56 | 12.06 | um11198 | -0.10 | 10.33 |
| 9c00051 | 0.08  | 12.70 | um11199 | 0.33  | 11.75 |
| 9c00052 | -0.16 | 9.42  | um11200 | -0.12 | 11.47 |
| 9c00053 | -0.19 | 9.74  | um11201 | 0.04  | 10.80 |
| 9c00054 | -0.76 | 11.33 | um11202 | 0.15  | 15.34 |
| 9c00055 | -1.39 | 10.44 | um11203 | 2.22  | 13.28 |
| 9c00056 | 0.00  | 12.58 | um11204 | -0.36 | 12.45 |
| 9c00057 | -0.96 | 12.74 | um11205 | 0.39  | 13.58 |
| 9c00058 | -0.15 | 12.10 | um11206 | 0.14  | 9.31  |
| 9c00059 | -0.65 | 12.03 | um11207 | -1.02 | 13.21 |
| 9c00060 | -0.05 | 13.28 | um11208 | -0.18 | 11.82 |
| 9c00061 | -0.07 | 13.05 | um11209 | 0.11  | 14.28 |
| 9c00062 | 0.82  | 13.48 | um11210 | -0.70 | 13.99 |
| 9c00063 | 0.13  | 14.03 | um11211 | -0.21 | 8.76  |
| 9c00064 | 0.74  | 12.75 | um11212 | -0.13 | 14.52 |
| 9c00065 | -0.43 | 11.75 | um11213 | 0.19  | 11.31 |
| 9c00066 | -0.06 | 8.78  | um11214 | -0.16 | 12.49 |
| 9c00067 | -0.11 | 10.23 | um11215 | -0.80 | 11.11 |
| 9c00068 | -0.11 | 8.85  | um11217 | -0.07 | 13.59 |
| 9c00069 | 0.17  | 15.87 | um11218 | -0.33 | 12.49 |
| 9c00070 | -0.06 | 11.36 | um11219 | 0.76  | 13.41 |
| 9c00071 | -0.93 | 11.13 | um11220 | -0.74 | 11.31 |
| 9c00072 | -0.18 | 9.67  | um11221 | -0.36 | 11.31 |

|         |       |       |         |       |       |
|---------|-------|-------|---------|-------|-------|
| 9c00073 | -0.06 | 11.55 | um11222 | -0.02 | 12.11 |
| 9c00074 | -0.73 | 10.25 | um11223 | 0.03  | 12.30 |
| 9c00075 | 0.32  | 12.09 | um11224 | 0.39  | 10.73 |
| 9c00076 | -0.75 | 12.04 | um11225 | 0.15  | 11.88 |
| 9c00077 | 0.19  | 11.28 | um11226 | 0.09  | 11.84 |
| 9c00078 | 0.07  | 10.21 | um11227 | 0.15  | 12.86 |
| 9c00079 | 0.51  | 11.68 | um11228 | -0.32 | 12.60 |
| 9c00080 | -0.07 | 12.84 | um11229 | 2.49  | 11.70 |
| 9c00081 | -0.27 | 9.11  | um11230 | 0.05  | 12.08 |
| 9c00082 | -0.12 | 8.92  | um11231 | 0.69  | 12.13 |
| 9c00083 | -0.08 | 13.71 | um11232 | -0.49 | 15.73 |
| 9c00084 | 0.61  | 9.82  | um11233 | 0.26  | 15.11 |
| 9c00085 | 1.26  | 13.92 | um11234 | -0.13 | 11.67 |
| 9c00086 | -0.16 | 11.92 | um11235 | 0.35  | 13.31 |
| 9c00087 | 0.73  | 13.49 | um11237 | 0.40  | 9.20  |
| 9c00088 | -0.30 | 10.33 | um11238 | 0.95  | 15.00 |
| 9c00089 | -0.64 | 11.60 | um11239 | 0.16  | 11.99 |
| 9c00090 | 0.29  | 10.80 | um11240 | 0.24  | 10.78 |
| 9c00091 | -0.23 | 11.77 | um11241 | 0.47  | 12.18 |
| 9c00092 | 0.46  | 12.43 | um11242 | 0.06  | 8.84  |
| 9c00093 | -0.17 | 8.86  | um11243 | 1.03  | 12.53 |
| 9c00094 | -0.10 | 10.40 | um11244 | -0.33 | 8.54  |
| 9c00095 | -0.73 | 12.32 | um11245 | 0.13  | 9.21  |
| 9c00096 | -0.11 | 11.53 | um11246 | 0.63  | 11.63 |
| 9c00097 | -0.54 | 12.22 | um11247 | 0.57  | 10.78 |
| 9c00098 | 0.44  | 10.29 | um11248 | 0.56  | 11.55 |
| 9c00099 | 0.08  | 9.83  | um11249 | 0.37  | 10.77 |
| 9c00100 | 0.69  | 12.29 | um11250 | -0.11 | 8.63  |
| 9c00101 | 0.30  | 11.74 | um11251 | 1.11  | 10.25 |
| 9c00102 | -0.40 | 11.65 | um11253 | -0.33 | 12.79 |
| 9c00103 | -0.10 | 10.96 | um11254 | 0.19  | 13.78 |
| 9c00104 | -0.29 | 12.27 | um11255 | -0.46 | 11.87 |
| 9c00105 | -0.68 | 11.51 | um11256 | 0.00  | 14.56 |
| 9c00106 | -0.02 | 13.26 | um11257 | 0.03  | 12.27 |
| 9c00107 | -0.17 | 12.46 | um11258 | 1.13  | 13.52 |
| 9c00108 | 0.02  | 12.75 | um11259 | 0.07  | 15.10 |
| 9c00109 | -0.09 | 9.65  | um11260 | -0.57 | 14.13 |
| 9c00110 | -0.32 | 11.26 | um11261 | 0.25  | 15.26 |
| 9c00111 | -0.08 | 13.18 | um11262 | 0.10  | 11.87 |
| 9c00112 | -0.22 | 11.68 | um11263 | -0.81 | 12.72 |
| 9c00113 | -0.19 | 9.78  | um11265 | 0.08  | 13.09 |
| 9c00114 | -0.42 | 14.91 | um11266 | -0.94 | 11.77 |
| 9c00115 | -0.78 | 13.17 | um11267 | -0.71 | 12.45 |
| 9c00116 | -1.15 | 13.77 | um11268 | 0.08  | 12.69 |
| 9c00117 | -0.02 | 13.30 | um11269 | -0.82 | 11.54 |
| 9c00118 | -0.79 | 14.36 | um11270 | -0.64 | 14.68 |
| 9c00119 | -0.27 | 13.30 | um11271 | -1.02 | 13.79 |
| 9c00120 | -0.36 | 10.33 | um11272 | 0.28  | 12.42 |
| 9c00121 | -0.26 | 10.69 | um11273 | -0.33 | 12.35 |
| 9c00122 | -0.16 | 11.72 | um11274 | 0.41  | 15.05 |
| 9c00123 | 0.32  | 11.49 | um11275 | 0.61  | 11.93 |
| 9c00124 | -0.47 | 10.06 | um11276 | -0.44 | 14.12 |
| 9c00125 | -0.25 | 10.88 | um11277 | 0.41  | 14.16 |
| 9c00126 | 0.43  | 13.12 | um11278 | -0.42 | 14.74 |

|         |       |       |         |       |       |
|---------|-------|-------|---------|-------|-------|
| 9c00127 | -0.28 | 13.06 | um11279 | 0.15  | 11.43 |
| 9c00128 | -0.36 | 12.25 | um11280 | 0.84  | 12.28 |
| 9c00129 | -0.31 | 11.56 | um11281 | -0.22 | 11.38 |
| 9c00130 | 0.12  | 12.01 | um11282 | -0.09 | 10.01 |
| 9c00131 | -0.06 | 13.47 | um11283 | 0.25  | 13.82 |
| 9c00132 | -0.72 | 12.93 | um11284 | -1.23 | 11.60 |
| 9c00133 | -0.36 | 12.06 | um11285 | -1.11 | 13.63 |
| 9c00134 | 0.42  | 13.68 | um11286 | 0.57  | 14.56 |
| 9c00135 | -0.64 | 11.35 | um11287 | 0.48  | 12.45 |
| 9c00136 | -0.52 | 13.59 | um11290 | 0.42  | 13.39 |
| 9c00137 | 0.02  | 11.90 | um11291 | 0.00  | 12.59 |
| 9c00138 | -0.37 | 9.84  | um11292 | 0.22  | 10.40 |
| 9c00139 | -0.71 | 15.14 | um11293 | 0.47  | 12.97 |
| 9c00140 | 0.67  | 12.33 | um11294 | -0.22 | 13.15 |
| 9c00141 | -0.01 | 10.34 | um11295 | 0.14  | 10.35 |
| 9c00142 | 0.46  | 11.99 | um11296 | -1.06 | 11.87 |
| 9c00143 | -0.19 | 11.94 | um11297 | -0.79 | 11.66 |
| 9c00144 | 0.70  | 11.28 | um11298 | 0.77  | 11.57 |
| 9c00145 | 0.30  | 11.71 | um11299 | 0.32  | 12.02 |
| 9c00146 | -0.29 | 12.55 | um11300 | 0.67  | 12.54 |
| 9c00147 | 0.11  | 8.44  | um11301 | 0.05  | 12.20 |
| 9c00148 | 0.50  | 11.87 | um11302 | 0.33  | 12.55 |
| 9c00149 | -0.29 | 11.93 | um11303 | 0.81  | 12.95 |
| 9c00150 | -0.31 | 11.47 | um11304 | 0.60  | 11.56 |
| 9c00151 | -0.06 | 14.19 | um11305 | 0.16  | 10.78 |
| 9c00152 | -0.13 | 12.99 | um11306 | 0.60  | 12.81 |
| 9c00153 | -0.06 | 10.01 | um11308 | 0.39  | 12.67 |
| 9c00154 | 0.30  | 12.20 | um11309 | -0.10 | 13.23 |
| 9c00155 | 0.31  | 13.40 | um11310 | 0.41  | 11.18 |
| 9c00156 | -0.10 | 10.84 | um11311 | 0.51  | 11.86 |
| 9c00157 | 0.20  | 8.65  | um11312 | 0.30  | 12.01 |
| 9c00158 | 0.10  | 12.98 | um11313 | 0.33  | 11.73 |
| 9c00159 | 0.11  | 11.77 | um11314 | 0.14  | 13.12 |
| 9c00160 | -0.49 | 11.70 | um11315 | 0.91  | 10.78 |
| 9c00161 | 0.62  | 11.92 | um11316 | 0.07  | 11.42 |
| 9c00162 | -0.27 | 12.12 | um11317 | 0.37  | 11.81 |
| 9c00163 | -0.34 | 11.81 | um11318 | -0.18 | 12.68 |
| 9c00164 | 0.19  | 12.89 | um11319 | -0.45 | 13.39 |
| 9c00165 | -0.43 | 13.14 | um11321 | 1.82  | 11.86 |
| 9c00166 | 0.00  | 11.45 | um11322 | -0.25 | 10.26 |
| 9c00167 | -0.16 | 12.04 | um11323 | -0.46 | 13.04 |
| 9c00168 | 0.27  | 12.12 | um11325 | -0.13 | 12.92 |
| 9c00169 | 0.41  | 11.37 | um11326 | -0.23 | 11.60 |
| 9c00170 | -0.29 | 11.60 | um11327 | -0.54 | 13.02 |
| 9c00171 | 0.05  | 11.84 | um11328 | -0.12 | 12.08 |
| 9c00172 | 0.46  | 10.53 | um11330 | 0.22  | 11.63 |
| 9c00173 | 0.07  | 11.84 | um11331 | -0.26 | 12.77 |
| 9c00174 | 0.48  | 13.30 | um11332 | 0.24  | 9.38  |
| 9c00175 | 0.70  | 12.24 | um11333 | 0.12  | 12.30 |
| 9c00176 | 0.61  | 13.81 | um11334 | 0.09  | 11.66 |
| 9c00177 | 0.42  | 12.42 | um11335 | 0.53  | 11.90 |
| 9c00178 | 0.05  | 12.60 | um11336 | 0.11  | 12.06 |
| 9c00179 | -0.09 | 13.40 | um11337 | 1.09  | 9.80  |
| 9c00180 | 0.57  | 12.38 | um11338 | -1.32 | 15.04 |

|         |       |       |         |       |       |
|---------|-------|-------|---------|-------|-------|
| 9c00181 | -0.15 | 11.61 | um11339 | -0.78 | 15.78 |
| 9c00182 | 0.31  | 11.84 | um11340 | -0.44 | 11.69 |
| 9c00183 | -0.25 | 9.13  | um11341 | 0.37  | 11.80 |
| 9c00184 | 0.41  | 12.04 | um11342 | 0.35  | 11.28 |
| 9c00185 | -1.02 | 13.29 | um11343 | -0.40 | 11.18 |
| 9c00186 | -0.02 | 11.82 | um11344 | -0.14 | 11.80 |
| 9c00187 | 0.43  | 12.85 | um11345 | -1.10 | 11.64 |
| 9c00188 | -0.21 | 15.86 | um11346 | -0.85 | 10.93 |
| 9c00189 | 0.07  | 13.56 | um11347 | 0.35  | 11.67 |
| 9c00190 | -0.26 | 12.72 | um11348 | 0.28  | 12.23 |
| 9c00191 | -0.08 | 9.46  | um11349 | 0.61  | 13.98 |
| 9c00192 | 0.02  | 14.35 | um11350 | 0.17  | 13.27 |
| 9c00193 | 0.00  | 11.94 | um11352 | 0.09  | 12.27 |
| 9c00194 | 0.50  | 12.65 | um11353 | -0.71 | 14.19 |
| 9c00195 | -0.24 | 11.78 | um11354 | 0.46  | 11.17 |
| 9c00196 | -0.36 | 15.16 | um11355 | -0.58 | 13.47 |
| 9c00197 | -0.27 | 11.69 | um11357 | 0.34  | 10.85 |
| 9c00198 | 0.54  | 11.71 | um11358 | -0.43 | 11.20 |
| 9c00199 | -0.06 | 10.76 | um11359 | -0.59 | 11.32 |
| 9c00200 | -0.12 | 11.65 | um11360 | -0.16 | 10.83 |
| 9c00201 | -0.07 | 10.00 | um11361 | -0.10 | 11.92 |
| 9c00202 | -0.55 | 12.25 | um11362 | -0.66 | 10.50 |
| 9c00203 | 0.16  | 10.24 | um11363 | -0.55 | 13.02 |
| 9c00204 | -0.57 | 15.45 | um11364 | -0.24 | 10.24 |
| 9c00205 | -0.27 | 13.90 | um11365 | 0.21  | 9.01  |
| 9c00206 | -0.13 | 11.44 | um11366 | 0.88  | 11.92 |
| 9c00207 | 0.16  | 11.74 | um11367 | -0.09 | 12.13 |
| 9c00208 | 0.86  | 12.61 | um11368 | 2.03  | 13.56 |
| 9c00209 | 0.30  | 14.36 | um11369 | 0.84  | 10.58 |
| 9c00210 | -0.36 | 10.60 | um11370 | 0.06  | 10.20 |
| 9c00211 | -0.16 | 12.91 | um11371 | 0.20  | 9.85  |
| 9c00212 | 0.41  | 13.30 | um11373 | 1.21  | 12.98 |
| 9c00213 | -0.24 | 10.64 | um11374 | 1.06  | 13.81 |
| 9c00214 | 0.10  | 13.11 | um11375 | -0.28 | 8.77  |
| 9c00215 | 0.25  | 12.19 | um11376 | -0.06 | 9.37  |
| 9c00216 | -0.09 | 11.52 | um11377 | -0.01 | 8.92  |
| 9c00217 | 0.52  | 13.04 | um11378 | 0.28  | 14.17 |
| 9c00218 | 0.11  | 12.45 | um11379 | -0.15 | 12.07 |
| 9c00219 | 0.23  | 12.97 | um11381 | -2.29 | 11.47 |
| 9c00220 | -0.06 | 14.60 | um11382 | 1.07  | 13.57 |
| 9c00221 | 0.42  | 11.47 | um11383 | 0.87  | 12.67 |
| 9c00222 | 0.13  | 12.14 | um11384 | 0.74  | 11.80 |
| 9c00223 | 0.15  | 9.67  | um11385 | 0.36  | 11.40 |
| 9c00224 | -0.57 | 11.63 | um11386 | 0.10  | 11.83 |
| 9c00225 | 0.36  | 15.35 | um11387 | -0.29 | 8.66  |
| 9c00226 | -0.76 | 11.95 | um11388 | -0.24 | 12.09 |
| 9c00227 | -0.77 | 12.65 | um11390 | 0.01  | 11.95 |
| 9c00228 | -0.32 | 10.02 | um11391 | -1.17 | 13.25 |
| 9c00229 | 0.11  | 9.40  | um11392 | -0.61 | 13.17 |
| 9c00230 | -0.16 | 11.96 | um11394 | -0.65 | 12.53 |
| 9c00231 | 0.02  | 12.22 | um11396 | 0.06  | 11.88 |
| 9c00232 | 0.97  | 12.70 | um11397 | 0.33  | 9.26  |
| 9c00233 | 0.37  | 11.78 | um11398 | 0.40  | 12.08 |
| 9c00234 | -0.17 | 13.40 | um11399 | 0.01  | 11.13 |

|         |       |       |         |       |       |
|---------|-------|-------|---------|-------|-------|
| 9c00235 | -0.08 | 13.78 | um11400 | -0.50 | 15.90 |
| 9c00236 | 0.23  | 12.07 | um11401 | -0.32 | 11.39 |
| 9c00237 | -0.07 | 10.40 | um11402 | 0.39  | 11.77 |
| 9c00238 | 0.30  | 13.09 | um11403 | 3.96  | 12.41 |
| 9c00239 | 0.11  | 13.76 | um11404 | 0.12  | 12.67 |
| 9c00240 | -0.04 | 11.89 | um11405 | -0.38 | 11.24 |
| 9c00241 | 0.18  | 12.10 | um11406 | 0.32  | 13.04 |
| 9c00242 | -0.02 | 8.76  | um11407 | 0.54  | 9.85  |
| 9c00243 | -0.70 | 11.93 | um11408 | -0.97 | 11.46 |
| 9c00244 | 0.10  | 12.37 | um11409 | -0.17 | 12.13 |
| 9c00245 | 0.23  | 8.90  | um11410 | 0.22  | 14.74 |
| 9c00246 | -0.01 | 12.63 | um11411 | 0.24  | 15.00 |
| 9c00247 | 3.00  | 10.82 | um11412 | 0.61  | 11.47 |
| 9c00248 | 0.03  | 12.11 | um11413 | 0.14  | 13.43 |
| 9c00249 | 0.45  | 11.35 | um11414 | 0.14  | 8.95  |
| 9c00250 | -0.26 | 10.03 | um11415 | -0.02 | 8.65  |
| 9c00251 | -0.16 | 10.92 | um11416 | -0.09 | 8.63  |
| 9c00252 | 0.28  | 12.04 | um11417 | -0.12 | 12.04 |
| 9c00253 | -0.22 | 12.16 | um11418 | -0.11 | 8.94  |
| 9c00254 | 0.07  | 12.73 | um11419 | 0.09  | 14.00 |
| 9c00255 | -0.07 | 8.87  | um11420 | -0.46 | 10.30 |
| 9c00256 | 1.92  | 13.18 | um11421 | -0.39 | 13.89 |
| 9c00257 | -0.18 | 12.73 | um11422 | 0.09  | 11.42 |
| 9c00258 | -0.46 | 10.76 | um11423 | -1.20 | 12.33 |
| 9c00259 | -0.17 | 8.72  | um11424 | 0.12  | 11.81 |
| 9c00260 | -1.14 | 12.09 | um11425 | 0.89  | 11.13 |
| 9c00261 | 0.40  | 12.63 | um11426 | -0.30 | 11.40 |
| 9c00262 | -0.46 | 10.54 | um11427 | -0.21 | 12.80 |
| 9c00263 | -0.02 | 12.91 | um11428 | 0.35  | 12.56 |
| 9c00264 | -0.45 | 10.55 | um11429 | 0.30  | 11.49 |
| 9c00265 | 0.13  | 11.77 | um11430 | 0.34  | 11.74 |
| 9c00266 | -0.37 | 14.66 | um11431 | -0.23 | 12.49 |
| 9c00267 | -0.11 | 12.69 | um11432 | 1.91  | 11.29 |
| 9c00268 | -0.27 | 12.83 | um11433 | 0.56  | 12.20 |
| 9c00269 | -0.10 | 13.42 | um11434 | 0.11  | 13.75 |
| 9c00270 | 0.82  | 13.47 | um11435 | -0.07 | 14.25 |
| 9c00271 | 0.39  | 13.92 | um11436 | 0.75  | 11.86 |
| 9c00272 | 0.17  | 11.89 | um11437 | 0.01  | 12.31 |
| 9c00273 | -0.24 | 12.19 | um11438 | 0.11  | 11.35 |
| 9c00274 | -0.52 | 13.35 | um11439 | -0.37 | 15.78 |
| 9c00275 | -0.34 | 9.56  | um11440 | -0.23 | 12.41 |
| 9c00276 | -0.11 | 8.50  | um11441 | -0.02 | 8.78  |
| 9c00277 | -0.08 | 8.73  | um11442 | 0.17  | 10.09 |
| 9c00278 | -0.20 | 13.91 | um11443 | 0.45  | 10.34 |
| 9c00279 | 0.25  | 11.91 | um11444 | 0.10  | 12.52 |
| 9c00280 | 0.12  | 10.28 | um11445 | 1.77  | 13.28 |
| 9c00281 | -0.28 | 13.03 | um11446 | 0.27  | 11.02 |
| 9c00282 | -0.38 | 11.08 | um11447 | 2.11  | 13.11 |
| 9c00283 | 0.51  | 13.35 | um11448 | 0.82  | 12.53 |
| 9c00284 | -0.18 | 12.28 | um11449 | 0.55  | 11.43 |
| 9c00285 | 0.78  | 12.19 | um11450 | 0.21  | 12.25 |
| 9c00286 | 0.27  | 11.61 | um11451 | 0.44  | 11.55 |
| 9c00287 | 0.34  | 10.33 | um11452 | 0.32  | 11.13 |
| 9c00288 | 0.08  | 10.07 | um11453 | -0.49 | 11.79 |

|         |       |       |         |       |       |
|---------|-------|-------|---------|-------|-------|
| 9c00289 | 0.14  | 10.51 | um11458 | -0.53 | 11.28 |
| 9c00290 | -0.44 | 12.36 | um11459 | 0.84  | 10.75 |
| 9c00291 | 0.12  | 8.68  | um11460 | -0.02 | 11.99 |
| 9c00292 | -0.13 | 9.04  | um11461 | 0.23  | 12.35 |
| 9c00293 | 0.01  | 12.70 | um11462 | 0.81  | 11.17 |
| 9c00294 | -0.54 | 14.63 | um11464 | -0.38 | 11.81 |
| 9c00295 | -0.10 | 12.34 | um11465 | -3.53 | 11.68 |
| 9c00296 | -0.05 | 11.26 | um11467 | 0.20  | 14.85 |
| 9c00297 | 0.33  | 9.15  | um11468 | -0.01 | 11.87 |
| 9c00298 | -0.08 | 8.68  | um11469 | 0.20  | 12.14 |
| 9c00299 | -0.17 | 12.90 | um11470 | -0.31 | 12.52 |
| 9c00300 | -0.09 | 11.08 | um11471 | 0.15  | 10.78 |
| 9c00301 | -0.05 | 13.51 | um11472 | -0.02 | 12.42 |
| 9c00302 | 0.01  | 10.05 | um11474 | 0.05  | 11.38 |
| 9c00303 | 0.03  | 12.58 | um11475 | 0.55  | 11.40 |
| 9c00304 | 0.19  | 12.40 | um11476 | -0.24 | 12.04 |
| 9c00305 | 0.46  | 13.11 | um11477 | 0.15  | 11.61 |
| 9c00306 | 0.22  | 12.88 | um11478 | 0.27  | 10.81 |
| 9c00307 | 0.17  | 9.77  | um11479 | 0.26  | 13.32 |
| 9c00308 | -0.46 | 9.49  | um11480 | 0.60  | 11.76 |
| 9c00309 | -0.01 | 10.91 | um11481 | 0.38  | 10.35 |
| 9c00310 | -0.02 | 13.60 | um11482 | 0.10  | 12.79 |
| 9c00311 | 0.24  | 13.79 | um11483 | -0.62 | 12.56 |
| 9c00312 | -0.26 | 12.02 | um11484 | -0.03 | 8.99  |
| 9c00313 | -0.01 | 9.17  | um11485 | -0.20 | 11.35 |
| 9c00314 | 0.02  | 13.11 | um11486 | 0.14  | 15.38 |
| 9c00315 | -0.09 | 13.05 | um11487 | 0.32  | 11.71 |
| 9c00316 | -0.04 | 12.17 | um11488 | 0.36  | 13.65 |
| 9c00317 | -1.08 | 13.64 | um11489 | -0.06 | 8.58  |
| 9c00318 | 0.15  | 10.76 | um11490 | 0.38  | 12.58 |
| 9c00319 | -0.33 | 11.28 | um11491 | 0.47  | 10.26 |
| 9c00320 | -0.10 | 12.36 | um11494 | -0.04 | 12.76 |
| 9c00321 | 0.12  | 10.49 | um11495 | 0.22  | 14.12 |
| 9c00322 | 0.58  | 13.17 | um11496 | -0.29 | 13.24 |
| 9c00323 | -0.02 | 9.61  | um11497 | -0.74 | 13.07 |
| 9c00324 | -0.23 | 14.39 | um11498 | -0.25 | 13.87 |
| 9c00325 | 0.18  | 15.10 | um11499 | 0.39  | 14.59 |
| 9c00326 | 0.12  | 12.87 | um11500 | -0.68 | 13.06 |
| 9c00327 | 0.03  | 10.62 | um11501 | -0.46 | 11.90 |
| 9c00328 | 0.11  | 13.60 | um11502 | -1.38 | 11.06 |
| 9c00329 | -0.92 | 12.42 | um11504 | 0.87  | 10.33 |
| 9c00330 | -0.25 | 11.57 | um11505 | 0.60  | 9.52  |
| 9c00331 | -0.12 | 12.32 | um11506 | -2.03 | 9.72  |
| 9c00332 | -0.22 | 11.61 | um11509 | -0.15 | 11.40 |
| 9c00333 | 0.71  | 12.50 | um11510 | 0.22  | 11.05 |
| 9c00334 | -0.39 | 12.57 | um11511 | 0.49  | 13.36 |
| 9c00335 | -0.22 | 13.02 | um11512 | -0.47 | 10.29 |
| 9c00336 | -0.25 | 12.74 | um11513 | 2.26  | 11.06 |
| 9c00337 | -0.18 | 9.82  | um11514 | 2.15  | 11.30 |
| 9c00338 | -0.36 | 14.86 | um11515 | -0.36 | 8.94  |
| 9c00339 | -0.10 | 11.28 | um11516 | 1.07  | 12.96 |
| 9c00340 | -0.42 | 12.63 | um11517 | -0.27 | 15.33 |
| 9c00341 | -0.07 | 11.72 | um11518 | -0.18 | 11.92 |
| 9c00342 | -0.03 | 10.03 | um11519 | -0.90 | 14.41 |



|         |       |       |         |       |       |
|---------|-------|-------|---------|-------|-------|
| 9c00343 | -0.22 | 8.75  | um11520 | -0.44 | 14.47 |
| 9c00344 | -0.35 | 14.26 | um11521 | -0.10 | 10.36 |
| 9c00345 | -0.15 | 10.83 | um11522 | -0.40 | 11.76 |
| 9c00346 | 0.68  | 13.97 | um11523 | 0.23  | 13.63 |
| 9c00347 | -0.62 | 12.14 | um11524 | 0.12  | 9.46  |
| 9c00348 | -0.93 | 13.60 | um11525 | 0.18  | 13.67 |
| 9c00349 | -0.12 | 12.06 | um11526 | 0.10  | 15.27 |
| 9c00350 | 0.50  | 12.32 | um11528 | -2.39 | 11.56 |
| 9c00351 | 0.39  | 11.57 | um11530 | 0.23  | 11.34 |
| 9c00352 | 1.12  | 13.33 | um11531 | 1.62  | 11.90 |
| 9c00353 | -0.55 | 12.49 | um11532 | -0.10 | 11.40 |
| 9c00354 | 0.44  | 12.17 | um11533 | 0.25  | 15.02 |
| 9c00355 | -0.35 | 13.19 | um11534 | 0.96  | 14.18 |
| 9c00356 | -0.03 | 11.78 | um11535 | -0.02 | 15.28 |
| 9c00357 | -0.07 | 12.05 | um11536 | 0.18  | 15.16 |
| 9c00358 | -0.50 | 14.52 | um11537 | 0.28  | 14.87 |
| 9c00359 | -0.77 | 14.66 | um11538 | 0.02  | 10.80 |
| 9c00360 | -0.25 | 9.32  | um11539 | 0.20  | 12.63 |
| 9c00361 | -0.18 | 14.01 | um11540 | 0.22  | 10.35 |
| 9c00362 | -0.58 | 13.19 | um11541 | 0.62  | 12.55 |
| 9c00363 | -0.31 | 11.53 | um11544 | -1.13 | 11.83 |
| 9c00364 | -0.06 | 8.76  | um11545 | -0.26 | 11.24 |
| 9c00365 | -0.08 | 10.89 | um11546 | -0.23 | 12.96 |
| 9c00366 | -0.08 | 13.03 | um11548 | 0.13  | 12.88 |
| 9c00367 | 0.19  | 12.38 | um11549 | 0.42  | 12.06 |
| 9c00368 | -0.01 | 13.26 | um11550 | 0.07  | 11.55 |
| 9c00369 | 0.10  | 11.69 | um11551 | 0.15  | 14.58 |
| 9c00370 | 0.31  | 10.72 | um11552 | 0.01  | 12.56 |
| 9c00371 | 0.20  | 10.68 | um11553 | 0.24  | 10.72 |
| 9c00372 | 0.60  | 12.35 | um11554 | -3.13 | 13.33 |
| 9c00373 | 0.31  | 11.43 | um11555 | -0.10 | 8.64  |
| 9c00374 | 0.06  | 12.11 | um11556 | 0.00  | 13.90 |
| 9c00375 | 0.21  | 13.19 | um11557 | 0.53  | 11.26 |
| 9c00376 | -0.32 | 13.68 | um11558 | 1.14  | 14.33 |
| 9c00377 | 0.28  | 12.43 | um11559 | 0.17  | 11.02 |
| 9c00378 | 0.76  | 13.42 | um11560 | -0.44 | 11.53 |
| 9c00379 | -0.34 | 12.55 | um11561 | 0.12  | 14.54 |
| 9c00380 | 1.00  | 11.58 | um11562 | 1.56  | 11.05 |
| 9c00381 | 0.31  | 13.85 | um11563 | -0.27 | 12.77 |
| 9c00382 | 1.45  | 14.97 | um11564 | -0.40 | 11.12 |
| 9c00383 | 0.08  | 8.72  | um11565 | 0.32  | 11.16 |
| 9c00384 | 0.55  | 12.51 | um11567 | 0.45  | 13.10 |
| 9c00385 | 0.73  | 12.56 | um11568 | 0.12  | 12.47 |
| 9c00386 | 0.40  | 11.52 | um11569 | 1.73  | 11.32 |
| 9c00387 | -0.14 | 12.83 | um11570 | 0.39  | 11.26 |
| 9c00388 | 1.43  | 11.85 | um11571 | 0.42  | 11.21 |
| 9c00389 | 0.14  | 11.69 | um11572 | 0.29  | 11.44 |
| 9c00390 | 0.09  | 13.08 | um11574 | -0.89 | 11.66 |
| 9c00391 | 0.26  | 11.52 | um11575 | -0.59 | 12.12 |
| 9c00392 | -1.01 | 10.88 | um11576 | -0.40 | 15.70 |
| 9c00393 | -0.45 | 10.94 | um11577 | -0.35 | 12.67 |
| 9c00394 | -0.33 | 11.09 | um11578 | -0.38 | 13.64 |
| 9c00395 | 0.04  | 11.90 | um11579 | -0.41 | 9.48  |
| 9c00396 | 0.00  | 11.56 | um11580 | 2.23  | 12.47 |

|         |       |       |         |       |       |
|---------|-------|-------|---------|-------|-------|
| 9c00397 | -2.55 | 13.22 | um11581 | -0.15 | 10.83 |
| 9c00398 | -0.25 | 12.15 | um11582 | 0.30  | 11.79 |
| 9c00399 | -0.55 | 12.77 | um11583 | 0.11  | 13.03 |
| 9c00400 | 0.55  | 11.57 | um11584 | 0.08  | 12.84 |
| 9c00401 | 0.35  | 12.17 | um11585 | -0.59 | 8.89  |
| 9c00402 | 0.00  | 11.99 | um11586 | 1.24  | 11.07 |
| 9c00403 | 0.12  | 11.52 | um11587 | -0.01 | 12.55 |
| 9c00404 | -0.56 | 11.97 | um11588 | -0.63 | 15.88 |
| 9c00405 | 0.07  | 9.12  | um11589 | 0.16  | 14.50 |
| 9c00406 | 0.59  | 13.58 | um11590 | 0.60  | 14.02 |
| 9c00407 | 0.25  | 14.11 | um11591 | -0.16 | 13.20 |
| 9c00408 | 0.28  | 13.29 | um11592 | -0.10 | 9.42  |
| 9c00409 | -0.39 | 14.50 | um11593 | 1.72  | 11.31 |
| 9c00410 | 0.49  | 10.45 | um11594 | -0.02 | 11.82 |
| 9c00411 | -0.07 | 12.38 | um11595 | -0.95 | 13.66 |
| 9c00412 | 0.04  | 9.23  | um11596 | 1.18  | 14.22 |
| 9c00413 | -0.07 | 12.00 | um11597 | 0.62  | 10.92 |
| 9c00414 | 0.61  | 12.10 | um11598 | -1.14 | 13.79 |
| 9c00415 | 0.42  | 13.39 | um11599 | -0.12 | 11.30 |
| 9c00416 | -0.26 | 10.14 | um11600 | -0.51 | 13.37 |
| 9c00417 | -0.08 | 13.67 | um11601 | -0.10 | 11.88 |
| 9c00418 | 0.25  | 12.96 | um11602 | 0.11  | 11.87 |
| 9c00419 | 0.48  | 10.01 | um11603 | 0.63  | 10.44 |
| 9c00420 | 0.07  | 15.54 | um11604 | -0.03 | 14.97 |
| 9c00421 | -0.10 | 10.75 | um11605 | 0.52  | 10.78 |
| 9c00422 | 0.04  | 11.02 | um11606 | 0.23  | 14.43 |
| 9c00423 | 0.71  | 14.06 | um11608 | 0.69  | 10.36 |
| 9c00424 | -0.30 | 9.41  | um11610 | 1.86  | 14.33 |
| 9c00425 | -0.03 | 8.65  | um11612 | -0.49 | 11.80 |
| 9c00426 | -0.22 | 12.24 | um11613 | 0.13  | 10.76 |
| 9c00427 | -0.58 | 14.14 | um11614 | -0.34 | 13.18 |
| 9c00428 | 0.32  | 14.54 | um11615 | 0.02  | 10.74 |
| 9c00429 | -0.43 | 12.44 | um11616 | -0.23 | 12.90 |
| 9c00430 | -0.37 | 11.23 | um11617 | 0.03  | 10.44 |
| 9c00431 | -0.32 | 10.80 | um11618 | 0.29  | 11.28 |
| 9c00432 | 0.07  | 10.50 | um11619 | 0.09  | 14.94 |
| 9c00433 | 0.02  | 10.25 | um11620 | 0.38  | 11.31 |
| 9c00434 | 0.21  | 13.69 | um11623 | -0.05 | 11.05 |
| 9c00435 | 0.49  | 10.90 | um11624 | -0.63 | 13.34 |
| 9c00436 | -0.45 | 13.15 | um11625 | 0.26  | 15.25 |
| 9c00437 | -0.27 | 12.85 | um11627 | 0.49  | 12.30 |
| 9c00438 | -0.08 | 12.48 | um11628 | 0.14  | 8.94  |
| 9c00439 | -0.71 | 9.91  | um11629 | 0.54  | 10.36 |
| 9c00440 | -2.48 | 11.80 | um11630 | 0.05  | 12.43 |
| 9d00001 | -0.36 | 10.79 | um11631 | 0.59  | 11.95 |
| 9d00002 | 0.16  | 11.69 | um11632 | -0.24 | 11.73 |
| 9d00003 | -0.71 | 12.14 | um11633 | 0.21  | 12.39 |
| 9d00004 | -0.24 | 14.39 | um11634 | -0.57 | 11.63 |
| 9d00005 | 0.21  | 12.71 | um11635 | 0.11  | 13.35 |
| 9d00006 | -0.11 | 10.75 | um11636 | 0.21  | 11.65 |
| 9d00007 | -0.66 | 10.51 | um11637 | 0.60  | 15.29 |
| 9d00008 | -0.20 | 12.18 | um11638 | -0.53 | 12.14 |
| 9d00009 | -0.01 | 8.73  | um11639 | 0.41  | 9.07  |
| 9d00010 | -0.03 | 8.62  | um11641 | 0.64  | 12.24 |

|         |       |       |         |       |       |
|---------|-------|-------|---------|-------|-------|
| 9d00011 | 0.04  | 8.71  | um11642 | 0.37  | 11.07 |
| 9d00012 | -0.73 | 12.58 | um11643 | -0.11 | 11.81 |
| 9d00013 | -0.69 | 14.72 | um11644 | -0.22 | 13.71 |
| 9d00014 | 0.24  | 12.88 | um11645 | 0.13  | 15.16 |
| 9d00015 | -0.06 | 10.85 | um11647 | -0.21 | 9.04  |
| 9d00016 | -0.27 | 13.55 | um11648 | -0.02 | 12.93 |
| 9d00017 | 0.20  | 13.45 | um11649 | 0.03  | 11.49 |
| 9d00018 | -0.78 | 9.92  | um11650 | 0.21  | 11.89 |
| 9d00019 | 0.12  | 12.99 | um11651 | -2.36 | 11.00 |
| 9d00020 | -0.03 | 9.83  | um11652 | 0.06  | 11.91 |
| 9d00021 | 0.29  | 12.17 | um11653 | 0.37  | 10.02 |
| 9d00022 | 0.70  | 13.73 | um11654 | 2.00  | 11.85 |
| 9d00023 | 0.12  | 12.49 | um11655 | -0.31 | 11.16 |
| 9d00024 | 0.11  | 10.58 | um11656 | 0.00  | 11.13 |
| 9d00025 | 0.08  | 10.34 | um11657 | -0.26 | 11.86 |
| 9d00026 | 0.30  | 10.11 | um11658 | -0.25 | 8.79  |
| 9d00027 | -0.17 | 11.61 | um11659 | -0.29 | 12.40 |
| 9d00028 | -1.23 | 12.10 | um11660 | 0.67  | 13.05 |
| 9d00029 | -0.10 | 11.07 | um11661 | -0.02 | 13.05 |
| 9d00030 | -0.66 | 13.70 | um11662 | 0.55  | 14.78 |
| 9d00031 | -0.13 | 12.08 | um11663 | 0.01  | 10.93 |
| 9d00032 | 0.36  | 11.92 | um11665 | 0.27  | 10.95 |
| 9d00033 | -0.45 | 12.90 | um11666 | -0.33 | 13.55 |
| 9d00034 | -1.22 | 13.73 | um11667 | 0.03  | 11.02 |
| 9d00035 | -0.49 | 12.97 | um11668 | 0.10  | 11.91 |
| 9d00036 | 0.08  | 12.10 | um11669 | 0.63  | 11.45 |
| 9d00037 | -0.15 | 11.07 | um11670 | 0.15  | 11.06 |
| 9d00038 | 0.12  | 12.31 | um11671 | -0.24 | 12.49 |
| 9d00039 | -1.24 | 14.18 | um11672 | -0.12 | 12.03 |
| 9d00040 | -0.02 | 11.90 | um11673 | 0.27  | 12.22 |
| 9d00041 | -0.61 | 13.23 | um11674 | -0.01 | 11.38 |
| 9d00042 | 0.17  | 11.26 | um11675 | 0.15  | 12.24 |
| 9d00043 | -0.56 | 11.81 | um11677 | -0.22 | 12.64 |
| 9d00044 | -0.21 | 10.44 | um11679 | 0.42  | 11.17 |
| 9d00045 | -0.89 | 12.62 | um11680 | -0.08 | 11.78 |
| 9d00046 | 0.12  | 15.56 | um11681 | -0.14 | 11.20 |
| 9d00047 | 0.04  | 8.99  | um11682 | -0.88 | 13.16 |
| 9d00048 | -0.07 | 8.83  | um11683 | -1.23 | 12.00 |
| 9d00049 | -0.57 | 14.67 | um11684 | 0.62  | 13.25 |
| 9d00050 | -0.25 | 10.25 | um11685 | 0.21  | 11.77 |
| 9d00051 | 0.00  | 12.82 | um11686 | 0.83  | 10.91 |
| 9d00052 | -0.22 | 11.42 | um11687 | 0.79  | 11.38 |
| 9d00053 | 0.79  | 11.53 | um11688 | -0.48 | 11.47 |
| 9d00054 | 0.05  | 8.41  | um11689 | 0.08  | 11.10 |
| 9d00055 | -0.28 | 11.19 | um11690 | 0.02  | 11.32 |
| 9d00056 | -0.72 | 9.12  | um11691 | 0.20  | 11.07 |
| 9d00057 | -0.03 | 15.93 | um11692 | -0.25 | 12.59 |
| 9d00058 | -0.91 | 13.52 | um11693 | 1.27  | 12.97 |
| 9d00059 | -0.57 | 12.38 | um11694 | -0.27 | 13.58 |
| 9d00060 | 0.20  | 13.43 | um11695 | 0.13  | 10.85 |
| 9d00061 | 0.84  | 13.99 | um11696 | 0.54  | 14.49 |
| 9d00062 | 0.43  | 9.65  | um11697 | -0.33 | 11.67 |
| 9d00063 | -0.38 | 13.79 | um11698 | -0.54 | 14.84 |
| 9d00064 | -1.62 | 12.54 | um11699 | -0.15 | 10.87 |

|         |       |       |         |       |       |
|---------|-------|-------|---------|-------|-------|
| 9d00065 | 0.07  | 11.79 | um11700 | -0.47 | 11.56 |
| 9d00066 | -0.01 | 11.79 | um11701 | -0.01 | 12.14 |
| 9d00067 | 0.44  | 12.20 | um11702 | -0.07 | 10.97 |
| 9d00068 | 0.06  | 12.02 | um11703 | 0.42  | 11.49 |
| 9d00069 | -0.16 | 10.92 | um11704 | -0.22 | 11.47 |
| 9d00070 | -0.09 | 10.94 | um11705 | 0.06  | 11.49 |
| 9d00071 | -0.15 | 11.19 | um11706 | 0.07  | 12.76 |
| 9d00072 | -0.15 | 11.31 | um11707 | 0.10  | 11.08 |
| 9d00073 | -0.28 | 11.65 | um11708 | -2.10 | 11.29 |
| 9d00074 | 0.04  | 13.44 | um11709 | -0.29 | 8.89  |
| 9d00075 | 0.09  | 11.21 | um11710 | 0.11  | 11.17 |
| 9d00076 | 0.46  | 10.13 | um11712 | 0.59  | 11.41 |
| 9d00077 | -0.59 | 15.15 | um11713 | -0.51 | 10.55 |
| 9d00078 | 0.00  | 9.32  | um11714 | -0.88 | 11.64 |
| 9d00079 | -0.27 | 13.12 | um11715 | 0.12  | 12.42 |
| 9d00080 | 0.35  | 12.68 | um11716 | -0.18 | 15.54 |
| 9d00081 | 0.40  | 9.57  | um11717 | -0.28 | 11.93 |
| 9d00082 | 0.28  | 11.34 | um11718 | -0.18 | 11.90 |
| 9d00083 | -0.26 | 14.40 | um11719 | -0.11 | 14.92 |
| 9d00084 | -1.77 | 9.87  | um11720 | -1.17 | 13.23 |
| 9d00085 | -0.04 | 10.65 | um11721 | 0.14  | 11.14 |
| 9d00086 | -0.31 | 12.29 | um11722 | 0.33  | 13.82 |
| 9d00087 | -0.73 | 12.92 | um11723 | -0.28 | 12.63 |
| 9d00088 | -1.31 | 11.47 | um11724 | 0.79  | 12.12 |
| 9d00089 | 0.13  | 12.83 | um11725 | 0.11  | 12.19 |
| 9d00090 | 0.06  | 12.28 | um11726 | 0.36  | 12.98 |
| 9d00091 | 0.02  | 11.74 | um11727 | 0.30  | 12.07 |
| 9d00092 | -0.21 | 13.12 | um11728 | 0.46  | 10.52 |
| 9d00093 | -0.32 | 11.93 | um11729 | -0.18 | 9.20  |
| 9d00094 | 0.43  | 13.15 | um11731 | -0.77 | 13.85 |
| 9d00095 | -0.29 | 11.87 | um11732 | -3.09 | 9.80  |
| 9d00096 | 0.28  | 10.90 | um11733 | 0.40  | 13.43 |
| 9d00097 | 0.09  | 10.32 | um11734 | 0.34  | 13.06 |
| 9d00098 | 0.41  | 12.59 | um11735 | -0.27 | 11.21 |
| 9d00099 | -0.48 | 10.97 | um11736 | 0.23  | 12.19 |
| 9d00100 | 0.48  | 13.15 | um11738 | 0.35  | 12.69 |
| 9d00101 | 0.21  | 12.45 | um11739 | 0.38  | 11.60 |
| 9d00102 | -0.07 | 9.90  | um11740 | -0.26 | 10.83 |
| 9d00103 | -0.84 | 11.88 | um11741 | -1.23 | 15.05 |
| 9d00104 | -0.62 | 14.57 | um11742 | -0.37 | 13.11 |
| 9d00105 | 0.46  | 12.17 | um11743 | -0.10 | 11.49 |
| 9d00106 | 0.07  | 11.85 | um11744 | 1.52  | 14.01 |
| 9d00107 | -0.51 | 11.57 | um11745 | 0.13  | 10.88 |
| 9d00108 | -0.21 | 11.19 | um11746 | -0.65 | 12.21 |
| 9d00109 | 0.48  | 13.36 | um11747 | -0.22 | 10.75 |
| 9d00110 | 0.22  | 11.65 | um11749 | -0.16 | 13.16 |
| 9d00111 | 0.40  | 10.49 | um11750 | -1.50 | 12.02 |
| 9d00112 | 0.17  | 8.62  | um11751 | -1.15 | 12.93 |
| 9d00113 | -0.63 | 11.09 | um11752 | -0.49 | 10.70 |
| 9d00114 | -0.16 | 11.06 | um11753 | 0.91  | 11.96 |
| 9d00115 | -1.28 | 12.31 | um11754 | 0.15  | 9.40  |
| 9d00116 | 0.01  | 9.25  | um11755 | -0.12 | 8.44  |
| 9d00117 | -0.03 | 12.60 | um11756 | 0.03  | 10.48 |
| 9d00118 | -0.14 | 10.73 | um11757 | 0.59  | 11.71 |

|         |       |       |         |       |       |
|---------|-------|-------|---------|-------|-------|
| 9d00119 | 0.47  | 13.20 | um11758 | -0.21 | 12.22 |
| 9d00120 | 0.10  | 13.81 | um11759 | -0.27 | 11.29 |
| 9d00121 | 0.30  | 11.93 | um11760 | -0.19 | 12.65 |
| 9d00122 | -0.03 | 11.17 | um11761 | 0.47  | 11.92 |
| 9d00123 | -0.17 | 13.12 | um11762 | 0.38  | 9.09  |
| 9d00124 | 0.35  | 11.98 | um11763 | 1.25  | 11.91 |
| 9d00125 | 0.12  | 11.59 | um11764 | 0.21  | 11.60 |
| 9d00126 | -0.30 | 12.03 | um11765 | 0.53  | 11.93 |
| 9d00127 | 0.00  | 10.45 | um11766 | -0.11 | 12.42 |
| 9d00128 | 0.11  | 10.72 | um11767 | 0.38  | 11.63 |
| 9d00129 | 0.05  | 9.68  | um11768 | 0.60  | 13.46 |
| 9d00130 | -0.68 | 15.10 | um11769 | 0.20  | 12.74 |
| 9d00131 | 0.06  | 9.87  | um11770 | -0.43 | 11.56 |
| 9d00132 | 0.28  | 11.84 | um11771 | -0.68 | 10.51 |
| 9d00133 | -0.07 | 11.98 | um11772 | -0.58 | 8.80  |
| 9d00134 | 1.12  | 13.82 | um11773 | -0.09 | 8.68  |
| 9d00135 | -0.02 | 13.05 | um11774 | 1.56  | 12.39 |
| 9d00136 | -0.38 | 12.96 | um11775 | 1.63  | 12.63 |
| 9d00137 | 0.09  | 11.33 | um11776 | -1.54 | 10.77 |
| 9d00138 | 0.27  | 10.51 | um11777 | -2.80 | 10.14 |
| 9d00139 | -0.38 | 12.96 | um11778 | 0.09  | 12.03 |
| 9d00140 | -0.26 | 11.81 | um11779 | 0.19  | 12.87 |
| 9d00141 | 0.72  | 10.04 | um11780 | 2.36  | 12.78 |
| 9d00142 | 0.41  | 13.15 | um11781 | 0.01  | 13.14 |
| 9d00143 | 0.02  | 12.14 | um11782 | -0.63 | 12.51 |
| 9d00144 | -0.03 | 12.21 | um11783 | 0.14  | 10.10 |
| 9d00145 | 0.01  | 12.02 | um11784 | -0.24 | 10.57 |
| 9d00146 | 0.42  | 11.80 | um11785 | -0.34 | 12.35 |
| 9d00147 | 0.24  | 14.10 | um11786 | 0.30  | 12.93 |
| 9d00148 | 0.05  | 12.19 | um11787 | -0.82 | 12.79 |
| 9d00149 | 0.25  | 10.60 | um11788 | 0.73  | 12.72 |
| 9d00150 | -0.71 | 9.89  | um11789 | -0.04 | 11.77 |
| 9d00151 | 0.33  | 13.04 | um11790 | 0.20  | 10.89 |
| 9d00152 | 0.71  | 12.42 | um11791 | 0.50  | 12.67 |
| 9d00153 | 0.01  | 12.67 | um11792 | 0.01  | 12.67 |
| 9d00154 | 0.57  | 12.67 | um11793 | 1.18  | 13.21 |
| 9d00155 | 0.28  | 12.97 | um11794 | 0.63  | 11.74 |
| 9d00156 | -0.67 | 15.43 | um11795 | 0.97  | 12.70 |
| 9d00157 | -0.34 | 12.12 | um11796 | 0.48  | 11.07 |
| 9d00158 | -0.15 | 12.79 | um11797 | -0.57 | 13.41 |
| 9d00159 | -0.11 | 10.31 | um11798 | 0.00  | 12.95 |
| 9d00160 | 0.15  | 11.16 | um11799 | -0.52 | 15.11 |
| 9d00161 | -0.03 | 12.56 | um11800 | -0.23 | 12.52 |
| 9d00162 | 0.29  | 12.90 | um11801 | -0.08 | 11.14 |
| 9d00163 | -0.04 | 10.29 | um11802 | -0.09 | 10.92 |
| 9d00164 | -0.11 | 10.08 | um11803 | -0.86 | 11.79 |
| 9d00165 | -0.25 | 13.12 | um11804 | -0.45 | 11.57 |
| 9d00166 | 0.42  | 10.40 | um11805 | -0.35 | 8.87  |
| 9d00167 | -0.22 | 12.00 | um11806 | -0.22 | 8.45  |
| 9d00168 | 0.04  | 10.31 | um11807 | 0.32  | 12.20 |
| 9d00169 | 0.01  | 12.75 | um11808 | -2.00 | 10.47 |
| 9d00170 | 0.13  | 9.37  | um11809 | -0.35 | 10.78 |
| 9d00171 | -0.85 | 10.91 | um11810 | 1.20  | 11.87 |
| 9d00172 | 0.15  | 9.17  | um11811 | -0.24 | 12.69 |

|         |       |       |         |       |       |
|---------|-------|-------|---------|-------|-------|
| 9d00173 | -0.32 | 13.14 | um11819 | -0.23 | 11.15 |
| 9d00174 | -1.38 | 10.15 | um11821 | 0.68  | 14.54 |
| 9d00175 | 0.05  | 10.65 | um11822 | 0.22  | 12.45 |
| 9d00176 | -0.41 | 12.97 | um11823 | 0.76  | 10.75 |
| 9d00177 | -0.04 | 12.26 | um11824 | 0.68  | 11.01 |
| 9d00178 | 0.23  | 13.04 | um11825 | -0.24 | 12.12 |
| 9d00179 | -0.38 | 9.73  | um11827 | 0.38  | 14.97 |
| 9d00180 | 0.40  | 12.76 | um11828 | 0.42  | 11.07 |
| 9d00181 | 0.17  | 11.86 | um11829 | 0.47  | 12.24 |
| 9d00182 | 0.16  | 15.32 | um11830 | -0.19 | 12.69 |
| 9d00183 | -0.02 | 12.31 | um11831 | -0.03 | 13.78 |
| 9d00184 | 0.05  | 11.51 | um11833 | 0.15  | 10.86 |
| 9d00185 | 0.36  | 13.54 | um11835 | 0.58  | 10.15 |
| 9d00186 | -0.13 | 13.03 | um11837 | 0.00  | 11.61 |
| 9d00187 | 0.02  | 11.31 | um11839 | -0.12 | 8.76  |
| 9d00188 | -0.18 | 11.68 | um11840 | 0.06  | 11.42 |
| 9d00189 | -0.18 | 11.27 | um11841 | -0.20 | 10.47 |
| 9d00190 | 0.45  | 13.15 | um11842 | 0.27  | 10.65 |
| 9d00191 | -0.09 | 12.68 | um11843 | -0.19 | 8.69  |
| 9d00192 | 0.05  | 12.71 | um11846 | 0.51  | 11.67 |
| 9d00193 | -0.06 | 14.67 | um11847 | -0.32 | 8.85  |
| 9d00194 | 0.16  | 11.79 | um11848 | -0.97 | 14.88 |
| 9d00195 | -0.51 | 11.83 | um11849 | -0.85 | 14.86 |
| 9d00196 | 0.16  | 11.18 | um11851 | 0.44  | 13.35 |
| 9d00197 | -0.89 | 12.51 | um11852 | -0.22 | 12.43 |
| 9d00198 | -0.75 | 12.84 | um11853 | 0.01  | 12.19 |
| 9d00199 | 0.04  | 11.95 | um11855 | -0.23 | 11.67 |
| 9d00200 | -0.20 | 11.73 | um11858 | 0.52  | 11.04 |
| 9d00201 | 0.12  | 13.37 | um11859 | -1.02 | 13.45 |
| 9d00202 | -0.73 | 14.17 | um11860 | 0.33  | 11.92 |
| 9d00203 | 0.28  | 12.30 | um11862 | 0.47  | 12.10 |
| 9d00204 | -0.34 | 10.66 | um11863 | -0.83 | 14.23 |
| 9d00205 | -0.40 | 11.09 | um11864 | -0.01 | 12.24 |
| 9d00206 | 0.00  | 13.21 | um11865 | -0.06 | 11.96 |
| 9d00207 | 0.00  | 12.08 | um11866 | 0.41  | 10.83 |
| 9d00208 | 0.18  | 9.27  | um11867 | 0.04  | 11.15 |
| 9d00209 | 0.40  | 10.75 | um11870 | 1.77  | 11.12 |
| 9d00210 | -0.27 | 13.25 | um11871 | 0.06  | 12.23 |
| 9d00211 | 0.09  | 12.32 | um11873 | -0.57 | 10.53 |
| 9d00212 | -0.41 | 11.32 | um11874 | -0.38 | 10.43 |
| 9d00213 | -0.03 | 8.70  | um11875 | -0.46 | 12.96 |
| 9d00214 | -0.26 | 11.32 | um11876 | 0.16  | 10.74 |
| 9d00215 | 0.14  | 8.87  | um11878 | 0.89  | 12.25 |
| 9d00216 | -0.31 | 12.44 | um11880 | 0.28  | 14.43 |
| 9d00217 | -0.20 | 12.29 | um11881 | -0.46 | 11.49 |
| 9d00218 | -0.30 | 11.83 | um11882 | 0.31  | 12.94 |
| 9d00219 | 0.20  | 11.08 | um11883 | -0.30 | 9.05  |
| 9d00220 | -0.28 | 12.81 | um11884 | 0.07  | 11.54 |
| 9d00221 | 0.60  | 12.32 | um11885 | 0.45  | 11.88 |
| 9d00222 | 0.38  | 11.14 | um11886 | -0.67 | 9.43  |
| 9d00223 | 0.02  | 11.31 | um11889 | -0.07 | 12.93 |
| 9d00224 | 0.07  | 13.92 | um11890 | 0.38  | 10.76 |
| 9d00225 | -0.49 | 13.14 | um11891 | 0.46  | 13.09 |
| 9d00226 | 0.19  | 11.92 | um11892 | -0.67 | 12.68 |

|         |       |       |         |       |       |
|---------|-------|-------|---------|-------|-------|
| 9d00227 | -1.92 | 12.84 | um11893 | 0.23  | 10.56 |
| 9d00228 | 0.14  | 12.31 | um11894 | 0.26  | 12.34 |
| 9d00229 | -0.21 | 10.16 | um11895 | 2.51  | 12.63 |
| 9d00230 | -0.34 | 13.15 | um11896 | 1.00  | 13.50 |
| 9d00231 | -0.51 | 12.73 | um11899 | 0.57  | 11.36 |
| 9d00232 | 0.32  | 11.52 | um11900 | 0.10  | 9.47  |
| 9d00233 | 0.15  | 14.44 | um11901 | -0.21 | 12.61 |
| 9d00234 | 0.26  | 11.90 | um11905 | 0.41  | 10.94 |
| 9d00235 | 0.08  | 12.55 | um11906 | -0.56 | 13.26 |
| 9d00236 | 0.08  | 9.49  | um11907 | -0.46 | 11.23 |
| 9d00237 | 0.21  | 12.85 | um11908 | 0.37  | 13.03 |
| 9d00238 | 0.47  | 12.51 | um11909 | 1.03  | 12.59 |
| 9d00239 | -0.61 | 13.96 | um11910 | 0.20  | 8.97  |
| 9d00240 | 1.34  | 13.77 | um11911 | -0.23 | 15.72 |
| 9d00241 | 1.15  | 14.19 | um11912 | 0.11  | 11.44 |
| 9d00242 | -0.13 | 9.88  | um11913 | 0.28  | 10.53 |
| 9d00243 | -0.41 | 11.52 | um11914 | 0.36  | 14.67 |
| 9d00244 | -0.21 | 11.32 | um11915 | 0.19  | 13.09 |
| 9d00245 | 0.16  | 9.22  | um11916 | 0.06  | 11.11 |
| 9d00246 | 0.25  | 13.28 | um11918 | 0.00  | 13.09 |
| 9d00247 | 0.74  | 11.53 | um11919 | 0.71  | 12.90 |
| 9d00248 | 0.57  | 10.89 | um11921 | 1.41  | 14.75 |
| 9d00249 | -0.45 | 12.52 | um11922 | -0.34 | 10.09 |
| 9d00250 | -0.32 | 11.76 | um11923 | -0.53 | 12.20 |
| 9d00251 | 0.68  | 13.56 | um11924 | -0.03 | 11.55 |
| 9d00252 | 0.15  | 11.74 | um11925 | -0.11 | 13.50 |
| 9d00253 | 0.34  | 9.69  | um11926 | -0.27 | 11.42 |
| 9d00254 | 0.34  | 12.62 | um11927 | 0.64  | 12.84 |
| 9d00255 | -0.19 | 11.10 | um11928 | -0.08 | 14.13 |
| 9d00256 | 0.25  | 12.91 | um11929 | -0.05 | 10.12 |
| 9d00257 | -0.06 | 12.98 | um11931 | -2.89 | 11.24 |
| 9d00258 | -0.89 | 10.87 | um11932 | 0.82  | 12.03 |
| 9d00259 | -0.65 | 14.00 | um11934 | 0.20  | 11.67 |
| 9d00260 | -0.02 | 11.45 | um11935 | -1.36 | 9.72  |
| 9d00261 | -0.25 | 13.27 | um11937 | -0.07 | 13.17 |
| 9d00262 | -0.12 | 9.18  | um11938 | 0.00  | 15.24 |
| 9d00263 | 0.04  | 12.23 | um11939 | 0.51  | 13.59 |
| 9d00264 | 0.12  | 11.90 | um11940 | -1.39 | 10.97 |
| 9d00265 | -0.12 | 12.10 | um11941 | 0.72  | 11.35 |
| 9d00266 | 0.24  | 13.74 | um11943 | 0.10  | 11.38 |
| 9d00267 | -0.02 | 12.75 | um11944 | 0.43  | 11.33 |
| 9d00268 | 0.13  | 12.75 | um11945 | -0.30 | 13.63 |
| 9d00269 | 0.08  | 8.74  | um11946 | -0.60 | 13.69 |
| 9d00270 | 0.48  | 12.95 | um11947 | -1.07 | 12.95 |
| 9d00271 | -0.13 | 13.04 | um11948 | -0.48 | 13.57 |
| 9d00272 | -0.19 | 12.42 | um11949 | -0.44 | 13.15 |
| 9d00273 | -0.03 | 13.31 | um11950 | -0.17 | 10.34 |
| 9d00274 | -0.02 | 13.83 | um11951 | 0.92  | 13.10 |
| 9d00275 | -0.03 | 12.76 | um11952 | -0.25 | 14.73 |
| 9d00276 | 0.00  | 13.93 | um11953 | -0.72 | 12.40 |
| 9d00277 | -0.50 | 13.41 | um11954 | 0.94  | 10.62 |
| 9d00278 | 0.12  | 9.98  | um11955 | 0.42  | 11.40 |
| 9d00279 | -0.30 | 12.27 | um11956 | 0.58  | 9.10  |
| 9d00280 | 0.50  | 12.26 | um11957 | 0.74  | 11.24 |

|         |       |       |         |       |       |
|---------|-------|-------|---------|-------|-------|
| 9d00281 | -0.76 | 9.33  | um11959 | -0.11 | 11.47 |
| 9d00282 | -0.28 | 11.22 | um11960 | -0.18 | 13.00 |
| 9d00283 | 0.53  | 12.17 | um11961 | -0.74 | 13.79 |
| 9d00284 | 0.20  | 10.66 | um11962 | -0.08 | 11.69 |
| 9d00285 | 0.35  | 12.36 | um11963 | -0.09 | 11.34 |
| 9d00286 | -0.17 | 12.82 | um11964 | 0.30  | 11.10 |
| 9d00287 | 0.27  | 12.72 | um11966 | 0.83  | 13.05 |
| 9d00288 | -0.06 | 12.79 | um11967 | 1.20  | 12.69 |
| 9d00289 | -0.06 | 13.20 | um11968 | 0.26  | 12.18 |
| 9d00290 | -0.03 | 12.88 | um11969 | 0.36  | 12.06 |
| 9d00291 | 0.28  | 11.78 | um11970 | -0.72 | 9.87  |
| 9d00292 | 0.31  | 12.30 | um11973 | 0.16  | 12.13 |
| 9d00293 | -0.96 | 11.94 | um11974 | -0.55 | 10.65 |
| 9d00294 | 0.13  | 11.68 | um11976 | -0.16 | 8.70  |
| 9d00295 | -0.21 | 11.07 | um11977 | 0.45  | 11.68 |
| 9d00296 | 0.38  | 13.53 | um11978 | 0.18  | 14.33 |
| 9d00297 | -0.25 | 12.09 | um11979 | -0.28 | 13.42 |
| 9d00298 | 0.20  | 13.05 | um11980 | 0.86  | 9.75  |
| 9d00299 | -0.10 | 12.38 | um11981 | 0.49  | 14.69 |
| 9d00300 | -0.22 | 12.09 | um11982 | 0.33  | 11.26 |
| 9d00301 | 0.02  | 11.11 | um11983 | -0.23 | 12.37 |
| 9d00302 | 0.09  | 12.21 | um11984 | 1.44  | 13.22 |
| 9d00303 | 0.45  | 13.62 | um11985 | -0.05 | 15.28 |
| 9d00304 | -0.25 | 12.01 | um11986 | -0.48 | 10.35 |
| 9d00305 | 0.13  | 10.95 | um11987 | 0.27  | 11.52 |
| 9d00306 | 0.17  | 13.67 | um11988 | 0.53  | 12.16 |
| 9d00307 | 0.13  | 12.12 | um11989 | 0.29  | 10.93 |
| 9d00308 | -0.13 | 12.62 | um11990 | -0.01 | 10.80 |
| 9d00309 | -0.13 | 11.92 | um11991 | 0.00  | 12.99 |
| 9d00310 | 0.17  | 9.79  | um11997 | 0.11  | 12.05 |
| 9d00311 | 0.15  | 9.46  | um11998 | -0.42 | 12.01 |
| 9d00312 | -0.22 | 13.53 | um11999 | -0.17 | 12.46 |
| 9d00313 | -0.03 | 14.11 | um12001 | -0.28 | 13.45 |
| 9d00314 | 0.22  | 13.12 | um12002 | 0.45  | 12.45 |
| 9d00315 | -0.35 | 11.18 | um12004 | -0.14 | 11.95 |
| 9d00316 | -0.50 | 11.54 | um12005 | -0.49 | 12.69 |
| 9d00317 | -0.48 | 12.71 | um12006 | 0.64  | 11.43 |
| 9d00318 | -0.48 | 10.33 | um12007 | 0.93  | 11.51 |
| 9d00319 | -0.08 | 10.63 | um12008 | -0.10 | 12.12 |
| 9d00320 | -0.70 | 11.72 | um12009 | 0.64  | 12.56 |
| 9d00321 | -0.16 | 12.58 | um12010 | 0.30  | 12.26 |
| 9d00322 | 0.11  | 11.85 | um12011 | 1.06  | 12.55 |
| 9d00323 | 0.71  | 13.38 | um12012 | 0.25  | 11.73 |
| 9d00324 | -0.34 | 11.39 | um12013 | -0.16 | 11.39 |
| 9d00325 | -0.26 | 10.18 | um12014 | 0.45  | 11.92 |
| 9d00326 | 0.40  | 14.36 | um12015 | -4.12 | 13.58 |
| 9d00327 | -0.24 | 11.93 | um12016 | -0.82 | 9.62  |
| 9d00328 | 0.92  | 11.77 | um12017 | -0.03 | 13.29 |
| 9d00329 | -0.11 | 13.19 | um12018 | 0.08  | 11.78 |
| 9d00330 | -0.16 | 8.70  | um12019 | -0.14 | 11.28 |
| 9d00331 | 0.23  | 12.29 | um12021 | 0.59  | 13.32 |
| 9d00332 | 0.49  | 14.04 | um12022 | 0.03  | 12.73 |
| 9d00333 | 0.11  | 9.34  | um12023 | -0.03 | 11.77 |
| 9d00334 | 0.36  | 14.77 | um12024 | -1.28 | 11.22 |



|         |       |       |         |       |       |
|---------|-------|-------|---------|-------|-------|
| 9d00335 | 0.61  | 13.43 | um12025 | 0.13  | 11.33 |
| 9d00336 | 0.26  | 12.11 | um12026 | 1.35  | 11.24 |
| 9d00337 | -0.33 | 11.15 | um12027 | 1.45  | 11.97 |
| 9d00338 | 0.01  | 12.12 | um12030 | 0.68  | 13.04 |
| 9d00339 | 0.13  | 11.81 | um12031 | -2.12 | 13.41 |
| 9d00340 | -0.07 | 13.50 | um12032 | -1.93 | 11.07 |
| 9d00341 | 0.15  | 13.05 | um12033 | -0.30 | 12.42 |
| 9d00342 | -0.38 | 11.19 | um12034 | -0.48 | 12.52 |
| 9d00343 | -1.80 | 11.64 | um12035 | 0.42  | 11.56 |
| 9d00344 | 0.20  | 12.48 | um12036 | -0.05 | 13.94 |
| 9d00345 | 0.15  | 13.17 | um12038 | -0.58 | 13.29 |
| 9d00346 | 0.16  | 12.04 | um12039 | -0.11 | 13.51 |
| 9d00347 | -0.45 | 12.01 | um12041 | -0.26 | 12.35 |
| 9d00348 | 0.13  | 11.40 | um12042 | 0.06  | 11.92 |
| 9d00349 | -0.26 | 12.08 | um12043 | 0.66  | 9.50  |
| 9d00350 | -0.16 | 9.81  | um12044 | -0.15 | 13.49 |
| 9d00351 | -0.70 | 13.92 | um12045 | -0.40 | 12.09 |
| 9d00352 | 0.24  | 11.93 | um12046 | 0.34  | 13.16 |
| 9d00353 | 0.27  | 13.63 | um12047 | 0.63  | 12.88 |
| 9d00354 | -0.12 | 14.95 | um12048 | 0.98  | 12.43 |
| 9d00355 | 0.21  | 9.43  | um12049 | 0.85  | 13.05 |
| 9d00356 | 0.17  | 13.43 | um12050 | -0.63 | 14.52 |
| 9d00357 | -0.70 | 12.84 | um12051 | -0.62 | 8.99  |
| 9d00358 | 0.20  | 11.90 | um12052 | -0.28 | 8.63  |
| 9d00359 | 0.02  | 8.98  | um12055 | -0.09 | 13.30 |
| 9d00360 | 0.10  | 10.09 | um12058 | -0.43 | 13.53 |
| 9d00361 | 0.01  | 13.70 | um12061 | 0.41  | 10.27 |
| 9d00362 | -2.12 | 12.27 | um12062 | -0.03 | 13.24 |
| 9d00363 | -0.48 | 11.41 | um12066 | 0.48  | 10.74 |
| 9d00364 | 0.44  | 12.13 | um12068 | 0.48  | 12.12 |
| 9d00365 | -0.98 | 14.87 | um12074 | 0.51  | 11.69 |
| 9d00366 | 0.53  | 13.32 | um12076 | -0.04 | 11.98 |
| 9d00367 | 0.03  | 8.60  | um12080 | -1.66 | 11.28 |
| 9d00368 | -0.21 | 11.49 | um12081 | 0.20  | 11.57 |
| 9d00369 | -0.63 | 12.12 | um12082 | -0.32 | 11.20 |
| 9d00370 | 0.27  | 12.82 | um12083 | -0.45 | 15.81 |
| 9d00371 | -0.22 | 12.40 | um12084 | 0.34  | 13.25 |
| 9d00372 | -0.16 | 12.85 | um12085 | 0.78  | 12.57 |
| 9d00373 | -0.03 | 8.92  | um12086 | 0.28  | 12.00 |
| 9d00374 | -0.24 | 13.19 | um12087 | -0.09 | 10.56 |
| 9d00375 | 0.55  | 12.17 | um12089 | -0.20 | 12.43 |
| 9d00376 | 0.29  | 11.98 | um12090 | -2.04 | 10.22 |
| 9d00377 | 0.32  | 12.79 | um12091 | 0.71  | 13.36 |
| 9d00378 | 0.12  | 9.68  | um12092 | 0.01  | 8.92  |
| 9d00379 | 0.17  | 11.03 | um12093 | 0.47  | 12.16 |
| 9d00380 | 0.20  | 11.76 | um12094 | 0.16  | 12.87 |
| 9d00381 | -0.02 | 15.89 | um12095 | -0.21 | 13.51 |
| 9d00382 | -0.04 | 10.11 | um12096 | -0.74 | 10.75 |
| 9d00383 | -0.02 | 12.81 | um12097 | 0.63  | 11.84 |
| 9d00384 | -0.38 | 12.14 | um12098 | 1.61  | 13.61 |
| 9d00385 | -0.17 | 11.59 | um12099 | -0.03 | 11.47 |
| 9d00386 | 0.02  | 11.77 | um12100 | 0.34  | 9.54  |
| 9d00387 | 0.08  | 12.65 | um12101 | 0.43  | 13.70 |
| 9d00388 | 0.56  | 13.30 | um12104 | -0.17 | 9.60  |

|         |       |       |         |       |       |
|---------|-------|-------|---------|-------|-------|
| 9d00389 | 0.07  | 13.22 | um12105 | -0.25 | 12.61 |
| 9d00390 | -0.30 | 10.98 | um12106 | -0.86 | 11.74 |
| 9d00391 | 0.17  | 12.17 | um12107 | -0.39 | 11.76 |
| 9d00392 | 0.28  | 10.52 | um12108 | 0.40  | 11.83 |
| 9d00393 | -0.11 | 12.99 | um12110 | 0.37  | 12.03 |
| 9d00394 | -0.05 | 12.64 | um12111 | 0.99  | 10.86 |
| 9d00395 | -0.09 | 11.96 | um12112 | 0.17  | 9.31  |
| 9d00396 | 0.27  | 9.01  | um12113 | 0.54  | 10.95 |
| 9d00397 | 0.36  | 11.26 | um12114 | -0.40 | 8.97  |
| 9d00398 | 0.08  | 14.32 | um12116 | 0.10  | 11.76 |
| 9d00399 | -0.09 | 11.34 | um12117 | -0.07 | 11.59 |
| 9d00400 | 0.91  | 15.10 | um12118 | -0.02 | 8.97  |
| 9d00401 | -0.01 | 13.41 | um12119 | 0.45  | 10.72 |
| 9d00402 | 0.33  | 14.70 | um12120 | -0.31 | 8.88  |
| 9d00403 | 0.01  | 8.44  | um12121 | 0.06  | 12.78 |
| 9d00404 | -0.02 | 13.54 | um12122 | 0.58  | 12.46 |
| 9d00405 | 0.32  | 11.73 | um12123 | 0.34  | 12.24 |
| 9d00406 | -0.60 | 13.94 | um12124 | -1.52 | 10.93 |
| 9d00407 | 0.24  | 13.15 | um12125 | 0.25  | 14.10 |
| 9d00408 | 0.10  | 13.45 | um12126 | 0.69  | 11.66 |
| 9d00409 | -0.28 | 11.36 | um12127 | -1.41 | 10.29 |
| 9d00410 | 0.15  | 11.67 | um12128 | 0.39  | 12.20 |
| 9d00411 | -0.66 | 12.23 | um12129 | 0.09  | 13.24 |
| 9d00412 | -0.01 | 12.25 | um12130 | 0.39  | 12.32 |
| 9d00413 | 0.00  | 14.81 | um12131 | -0.37 | 15.47 |
| 9d00414 | -0.26 | 12.50 | um12132 | 0.45  | 12.55 |
| 9d00415 | -0.35 | 11.97 | um12133 | -0.45 | 11.58 |
| 9d00416 | -1.97 | 10.09 | um12134 | -0.19 | 10.75 |
| 9d00417 | -0.21 | 8.61  | um12135 | 0.23  | 12.83 |
|         |       |       | um12136 | 0.04  | 13.01 |
|         |       |       | um12137 | 0.42  | 8.98  |
|         |       |       | um12138 | 0.30  | 10.90 |
|         |       |       | um12140 | -0.09 | 11.03 |
|         |       |       | um12141 | -0.32 | 10.47 |
|         |       |       | um12142 | 0.37  | 11.81 |
|         |       |       | um12143 | -0.65 | 13.03 |
|         |       |       | um12144 | 1.55  | 10.03 |
|         |       |       | um12146 | -0.71 | 12.79 |
|         |       |       | um12147 | -0.11 | 11.24 |
|         |       |       | um12148 | -0.18 | 11.09 |
|         |       |       | um12149 | -0.13 | 9.52  |
|         |       |       | um12150 | 0.21  | 11.85 |
|         |       |       | um12151 | -0.02 | 11.69 |
|         |       |       | um12152 | -0.11 | 12.15 |
|         |       |       | um12153 | 0.17  | 11.47 |
|         |       |       | um12154 | 0.57  | 10.43 |
|         |       |       | um12155 | 0.74  | 9.97  |
|         |       |       | um12156 | -0.07 | 9.02  |
|         |       |       | um12157 | -0.28 | 9.06  |
|         |       |       | um12158 | 0.80  | 12.02 |
|         |       |       | um12159 | -0.03 | 11.89 |
|         |       |       | um12160 | -0.54 | 13.50 |
|         |       |       | um12161 | 1.05  | 10.43 |
|         |       |       | um12163 | 0.46  | 11.79 |

|         |       |       |
|---------|-------|-------|
| um12165 | 0.17  | 11.87 |
| um12166 | 0.18  | 12.80 |
| um12167 | 0.35  | 12.26 |
| um12168 | 0.26  | 11.43 |
| um12169 | 1.11  | 13.36 |
| um12171 | 0.31  | 11.72 |
| um12172 | 0.30  | 13.13 |
| um12173 | 1.41  | 12.74 |
| um12174 | 0.22  | 11.65 |
| um12175 | 3.31  | 13.14 |
| um12176 | 0.23  | 11.12 |
| um12177 | -0.24 | 9.83  |
| um12178 | 1.45  | 12.69 |
| um12179 | 0.66  | 13.54 |
| um12181 | 0.34  | 12.03 |
| um12182 | 0.02  | 10.73 |
| um12183 | -0.76 | 11.74 |
| um12184 | -0.47 | 15.35 |
| um12185 | 0.81  | 11.20 |
| um12186 | -0.27 | 11.94 |
| um12187 | 0.08  | 8.68  |
| um12188 | 0.01  | 12.94 |
| um12189 | 0.07  | 11.13 |
| um12190 | 0.51  | 13.44 |
| um12191 | 0.46  | 11.52 |
| um12192 | -0.44 | 12.38 |
| um12193 | 0.09  | 9.48  |
| um12194 | 0.35  | 11.43 |
| um12195 | -0.09 | 12.19 |
| um12196 | 0.52  | 13.18 |
| um12197 | -0.39 | 9.67  |
| um12198 | -1.02 | 13.18 |
| um12199 | 0.48  | 11.57 |
| um12200 | 0.58  | 12.37 |
| um12201 | 0.02  | 10.67 |
| um12202 | -0.07 | 11.75 |
| um12203 | 0.18  | 11.29 |
| um12204 | 0.87  | 12.97 |
| um12205 | -0.25 | 11.65 |
| um12206 | -0.18 | 13.71 |
| um12207 | 0.33  | 10.66 |
| um12208 | -0.24 | 11.03 |
| um12209 | -0.31 | 10.88 |
| um12210 | -0.42 | 11.63 |
| um12211 | -0.12 | 12.24 |
| um12212 | 0.37  | 12.09 |
| um12213 | 0.13  | 12.16 |
| um12214 | -0.26 | 8.75  |
| um12215 | -0.15 | 8.45  |
| um12216 | 0.00  | 8.59  |
| um12217 | 0.03  | 9.77  |
| um12218 | -0.55 | 10.98 |
| um12219 | 0.41  | 12.46 |
| um12221 | 0.38  | 11.27 |

|         |       |       |
|---------|-------|-------|
| um12222 | 0.62  | 10.92 |
| um12223 | 0.53  | 12.01 |
| um12224 | 0.59  | 11.47 |
| um12225 | -0.29 | 9.32  |
| um12226 | 0.33  | 10.98 |
| um12227 | 0.47  | 11.67 |
| um12228 | 0.26  | 11.87 |
| um12229 | 0.09  | 9.12  |
| um12230 | 0.95  | 11.75 |
| um12231 | -0.43 | 11.38 |
| um12232 | 0.40  | 11.44 |
| um12233 | 0.04  | 8.86  |
| um12234 | 0.48  | 11.80 |
| um12235 | 0.64  | 10.41 |
| um12236 | -0.95 | 13.54 |
| um12237 | -0.05 | 11.34 |
| um12238 | -4.14 | 13.52 |
| um12239 | 0.05  | 12.11 |
| um12240 | 0.84  | 11.52 |
| um12241 | 0.25  | 11.27 |
| um12242 | -0.67 | 12.42 |
| um12243 | 0.07  | 11.72 |
| um12244 | -0.38 | 11.68 |
| um12246 | 0.20  | 11.89 |
| um12247 | 0.15  | 12.23 |
| um12248 | -0.22 | 8.41  |
| um12249 | 0.83  | 11.39 |
| um12250 | -0.73 | 12.01 |
| um12251 | -0.22 | 13.13 |
| um12253 | 0.13  | 9.74  |
| um12254 | 0.07  | 12.72 |
| um12255 | 0.09  | 11.80 |
| um12256 | -0.01 | 10.68 |
| um12257 | -0.19 | 8.91  |
| um12258 | -0.14 | 8.44  |
| um12259 | -0.34 | 11.82 |
| um12260 | 0.03  | 12.40 |
| um12261 | 1.01  | 11.93 |
| um12262 | -1.18 | 12.60 |
| um12263 | 0.44  | 10.44 |
| um12264 | -0.16 | 9.65  |
| um12265 | -0.63 | 9.82  |
| um12267 | 1.06  | 12.61 |
| um12269 | 0.10  | 12.86 |
| um12271 | 0.85  | 14.18 |
| um12272 | -0.24 | 11.85 |
| um12273 | 0.93  | 11.87 |
| um12275 | 0.52  | 9.80  |
| um12276 | -0.18 | 11.40 |
| um12277 | 0.40  | 12.47 |
| um12278 | -0.70 | 13.06 |
| um12279 | 0.00  | 10.87 |
| um12280 | 0.71  | 12.13 |
| um12281 | -0.34 | 9.47  |

|         |       |       |
|---------|-------|-------|
| um12282 | -0.53 | 13.23 |
| um12283 | 1.03  | 12.93 |
| um12284 | 0.44  | 12.17 |
| um12285 | 0.60  | 11.40 |
| um12286 | 0.06  | 10.34 |
| um12287 | -0.04 | 8.77  |
| um12288 | 0.77  | 11.90 |
| um12289 | 0.20  | 11.54 |
| um12291 | -0.20 | 12.65 |
| um12292 | -0.31 | 9.46  |
| um12293 | -0.28 | 11.24 |
| um12294 | -0.15 | 11.86 |
| um12295 | 1.31  | 11.77 |
| um12296 | 0.38  | 12.26 |
| um12297 | 0.60  | 11.89 |
| um12298 | -0.50 | 10.59 |
| um12299 | -0.67 | 13.51 |
| um12300 | -2.13 | 12.63 |
| um12301 | -0.22 | 12.09 |
| um12302 | -0.22 | 9.12  |
| um12303 | 2.20  | 11.27 |
| um12304 | 2.79  | 11.65 |
| um12305 | -0.29 | 12.17 |
| um12306 | 0.36  | 11.49 |
| um12307 | 0.16  | 11.97 |
| um12308 | 0.03  | 9.84  |
| um12309 | -0.39 | 11.13 |
| um12310 | 1.27  | 10.56 |
| um12311 | 0.10  | 11.26 |
| um12312 | -0.38 | 11.85 |
| um12313 | -1.21 | 11.18 |
| um12314 | 0.10  | 13.18 |
| um12315 | -0.80 | 8.85  |
| um12316 | -0.29 | 11.35 |
| um12317 | 0.41  | 11.82 |
| um12318 | -0.55 | 9.18  |
| um12319 | -0.34 | 9.78  |
| um12320 | -0.32 | 9.97  |
| um12321 | -0.17 | 12.75 |
| um12322 | -0.32 | 8.56  |
| um12323 | -0.17 | 8.67  |
| um12324 | -1.12 | 11.99 |
| um12325 | 0.84  | 10.48 |
| um12326 | 0.04  | 11.13 |
| um12327 | 0.18  | 12.21 |
| um12328 | 1.03  | 12.43 |
| um12329 | 0.18  | 12.03 |
| um12330 | -1.04 | 10.41 |
| um12331 | 0.89  | 11.71 |
| um12332 | -0.13 | 10.60 |
| um12333 | 0.71  | 11.93 |
| um12334 | 0.12  | 11.33 |
| um12335 | -0.10 | 10.91 |
| um12336 | -1.06 | 10.05 |

|         |       |       |
|---------|-------|-------|
| um12337 | -0.46 | 10.52 |
| um12338 | -0.06 | 9.98  |
| um12339 | -0.56 | 10.28 |
| um12340 | 0.16  | 8.88  |
| um12341 | 0.00  | 8.83  |
| um12342 | 0.09  | 12.96 |
| um12346 | 0.39  | 9.37  |
| um12350 | -0.64 | 15.92 |
| um15000 | 0.41  | 11.53 |
| um15001 | -0.59 | 12.42 |
| um15002 | -0.49 | 12.51 |
| um15003 | 0.40  | 11.82 |
| um15004 | 0.33  | 14.69 |
| um15005 | -0.11 | 12.26 |
| um15006 | -0.54 | 14.02 |
| um15007 | -0.04 | 11.16 |
| um15008 | -0.34 | 14.95 |
| um15009 | -0.26 | 12.69 |
| um15011 | -0.21 | 11.59 |
| um15012 | -0.36 | 11.97 |
| um15013 | -0.22 | 12.21 |
| um15014 | -0.99 | 12.46 |
| um15015 | -0.08 | 12.16 |
| um15016 | 0.03  | 11.42 |
| um15017 | -0.30 | 11.85 |
| um15018 | 0.31  | 13.59 |
| um15019 | -0.27 | 11.79 |
| um15020 | 0.03  | 13.54 |
| um15021 | 0.93  | 12.49 |
| um15022 | 0.06  | 12.62 |
| um15023 | -0.10 | 11.83 |
| um15024 | -0.96 | 9.63  |
| um15025 | 1.37  | 11.06 |
| um15026 | 0.45  | 13.09 |
| um15027 | 0.10  | 10.85 |
| um15028 | -0.23 | 13.48 |
| um15029 | -0.31 | 12.49 |
| um15030 | 0.04  | 12.60 |
| um15031 | -0.08 | 10.51 |
| um15032 | -0.13 | 10.19 |
| um15034 | -0.46 | 14.32 |
| um15035 | -0.11 | 11.46 |
| um15036 | -0.20 | 12.56 |
| um15037 | 0.32  | 11.76 |
| um15038 | -0.19 | 11.28 |
| um15039 | -0.14 | 11.48 |
| um15040 | -0.60 | 11.76 |
| um15041 | -0.03 | 10.28 |
| um15042 | 0.19  | 13.54 |
| um15043 | -0.90 | 12.66 |
| um15045 | -1.15 | 11.58 |
| um15046 | 0.35  | 10.81 |
| um15047 | -0.53 | 12.36 |
| um15048 | 1.14  | 11.96 |

|         |       |       |
|---------|-------|-------|
| um15049 | -0.58 | 12.17 |
| um15050 | 0.14  | 13.39 |
| um15051 | 1.19  | 12.77 |
| um15052 | 0.66  | 13.22 |
| um15053 | 0.21  | 11.99 |
| um15054 | -0.40 | 10.90 |
| um15055 | -0.25 | 11.38 |
| um15056 | 0.19  | 11.00 |
| um15057 | -0.94 | 10.76 |
| um15058 | 0.68  | 10.75 |
| um15059 | 0.33  | 11.98 |
| um15060 | -0.41 | 11.10 |
| um15061 | -0.91 | 11.82 |
| um15062 | 0.11  | 11.17 |
| um15063 | 0.36  | 11.65 |
| um15064 | -0.29 | 11.11 |
| um15065 | -0.26 | 11.74 |
| um15066 | 0.42  | 11.05 |
| um15067 | -0.25 | 11.42 |
| um15068 | -0.17 | 12.79 |
| um15069 | 0.43  | 11.38 |
| um15070 | 0.82  | 12.29 |
| um15071 | 0.39  | 10.59 |
| um15072 | 0.86  | 9.76  |
| um15073 | -0.21 | 11.57 |
| um15074 | 0.20  | 11.52 |
| um15075 | 0.41  | 12.42 |
| um15076 | 0.10  | 10.07 |
| um15077 | -0.36 | 11.40 |
| um15078 | -0.12 | 11.55 |
| um15079 | 1.26  | 13.37 |
| um15080 | -0.67 | 10.56 |
| um15081 | 0.07  | 10.90 |
| um15082 | 0.30  | 10.79 |
| um15083 | -0.39 | 11.37 |
| um15084 | -0.12 | 15.25 |
| um15085 | -0.10 | 11.59 |
| um15086 | -0.39 | 11.37 |
| um15087 | 0.27  | 12.12 |
| um15088 | 0.07  | 11.49 |
| um15089 | -0.36 | 11.79 |
| um15090 | 2.18  | 12.99 |
| um15091 | 0.89  | 10.80 |
| um15092 | 0.94  | 14.49 |
| um15093 | 0.16  | 11.37 |
| um15094 | 0.37  | 11.84 |
| um15095 | -1.22 | 13.12 |
| um15096 | 0.71  | 11.65 |
| um15097 | -0.01 | 11.56 |
| um15098 | 0.97  | 11.07 |

---
