# Supplementary material for: Genome and Transcriptome Analysis of the Basidiomycetous Yeast Pseudozyma antarctica Producing Extracellular Glycolipids, Mannosylerythritol Lipids
Source: PubMed Central journal article supplement (PMC3933340; doi:10.1371/journal.pone.0086490), 2014-02-24
Supplement: pone.0086490.s008.pdf [file pone.0086490.s008.pdf]

**Supplementary Table S7**  
Differentially expressed genes analysis

| <i>P. antarctica</i><br>gene | p-val    | kegg   | annotation                                                      | <i>U. maydis</i><br>gene | p-val    | kegg   | annotation                                                                              |
|------------------------------|----------|--------|-----------------------------------------------------------------|--------------------------|----------|--------|-----------------------------------------------------------------------------------------|
| 5400026                      | 9.32E-33 | K01187 | maltase glucoamylase and related hydrolases                     | um10632                  | 1.56E-17 | ni     | related to ph-regulated antigen pra1 precursor                                          |
| 22200064                     | 8.13E-32 | ni     | permease of the major facilitator superfamily                   | um01052                  | 7.89E-16 | ni     | putative protein                                                                        |
| 7400295                      | 4.27E-29 | K00507 | fatty acid desaturase                                           | um03110                  | 9.17E-16 | K14709 | related to ZRT2 - Zinc transporter II                                                   |
| 13300320                     | 3.33E-25 | ni     | synaptic vesicle transporter SVOP and related transporters      | um00309                  | 2.43E-15 | ni     | conserved hypothetical protein                                                          |
| 8000044                      | 1.77E-24 | K07119 | predicted NAD-dependent oxidoreductase                          | um02984                  | 2.78E-15 | ni     | related to Dibenzothiohophene desulfurizing enzyme C                                    |
| 9000247                      | 1.49E-23 | ni     | hypothetical protein                                            | um00876                  | 5.45E-15 | ni     | related to SPR1 - exo-1                                                                 |
| 8000029                      | 8.06E-23 | ni     | hypothetical protein                                            | um06042                  | 6.62E-15 | ni     | conserved hypothetical protein                                                          |
| 22200024                     | 1.30E-22 | ni     | predicted transporter                                           | um01187                  | 9.08E-15 | ni     | conserved hypothetical protein                                                          |
| 6400004                      | 8.74E-22 | K01187 | alpha-amylase                                                   | um02215                  | 9.42E-15 | ni     | related to dibenzothiohophene desulfurizing enzyme                                      |
| 7400178                      | 2.16E-21 | ni     | hypothetical protein                                            | um02626                  | 1.10E-14 | ni     | conserved hypothetical protein                                                          |
| 22200208                     | 4.27E-21 | ni     | hypothetical protein                                            | um03381                  | 1.77E-14 | ni     | conserved hypothetical protein                                                          |
| 22200094                     | 6.08E-21 | ni     | hypothetical protein                                            | um03475                  | 2.49E-14 | K14640 | probable PHC89 - Na                                                                     |
| 7400360                      | 1.02E-20 | ni     | predicted L-carnitine dehydratase                               | um12015                  | 3.92E-14 | ni     | conserved hypothetical Ustilago-specific protein                                        |
| 9000397                      | 4.12E-20 | ni     | hypothetical protein                                            | um00529                  | 4.78E-14 | ni     | probable carboxylic acid transport protein JEN1                                         |
| 24400054                     | 5.99E-20 | ni     | hypothetical protein                                            | um00027                  | 5.21E-14 | ni     | putative protein                                                                        |
| 13400099                     | 9.56E-20 | K01178 | hypothetical protein                                            | um12238                  | 7.61E-14 | ni     | conserved hypothetical Ustilago-specific protein                                        |
| 4900039                      | 1.99E-19 | ni     | hypothetical protein                                            | um03558                  | 8.46E-14 | ni     | conserved hypothetical protein                                                          |
| 22200300                     | 5.32E-18 | K13953 | alkyl dehydrogenase                                             | um02625                  | 1.18E-13 | ni     | probable DUR3 - Urea permease                                                           |
| 9000005                      | 6.92E-18 | ni     | NADH, flavin oxidoreductase                                     | um04309                  | 1.40E-13 | ni     | probable Alpha-L-arabinofuranosidase precursor                                          |
| 7400359                      | 8.04E-18 | ni     | 3-Methylcrotonyl-CoA carboxylase, non-biotin containing subunit | um05253                  | 1.63E-13 | ni     | related to ATP-binding multidrug cassette transport protein                             |
| 19000005                     | 9.19E-16 | K14709 | Fe <sup>2+</sup> /Zn <sup>2+</sup> regulated transporter        | um00842                  | 2.39E-13 | ni     | probable aflatoxin efflux pump AFLT                                                     |
| 14400115                     | 1.02E-15 | ni     | hypothetical protein                                            | um05228                  | 2.40E-13 | ni     | conserved hypothetical protein                                                          |
| 27400022                     | 1.39E-15 | ni     | hypothetical protein                                            | um11465                  | 2.51E-13 | ni     | putative protein                                                                        |
| 9400227                      | 3.31E-15 | ni     | hypothetical protein                                            | um05084                  | 4.99E-13 | ni     | related to lignostilbene alpha                                                          |
| 7400358                      | 3.69E-15 | ni     | transcription factor                                            | um03585                  | 7.29E-13 | ni     | conserved hypothetical protein                                                          |
| 9400256                      | 3.75E-15 | ni     | hypothetical protein                                            | um03560                  | 7.83E-13 | ni     | related to beta-1                                                                       |
| 18400042                     | 1.31E-14 | ni     | hypothetical protein                                            | um03169                  | 7.87E-13 | K00819 | probable CAR2 - ornithine aminotransferase                                              |
| 18400112                     | 1.54E-14 | ni     | hypothetical protein                                            | um05791                  | 7.88E-13 | ni     | related to Cytochrome P450                                                              |
| 1900045                      | 1.61E-14 | ni     | predicted transporter                                           | um05276                  | 1.01E-12 | ni     | conserved hypothetical protein                                                          |
| 4000035                      | 2.81E-14 | ni     | hypothetical protein                                            | um04358                  | 1.28E-12 | ni     | conserved hypothetical protein                                                          |
| 9400343                      | 3.74E-14 | ni     | hypothetical protein                                            | um10581                  | 1.46E-12 | ni     | related to Alcohol dehydrogenase class III chi chain                                    |
| 25000020                     | 1.07E-13 | ni     | hypothetical protein                                            | um05252                  | 1.46E-12 | ni     | probable nadp-dependent mannitol dehydrogenase K                                        |
| 15000002                     | 1.07E-13 | K00326 | NADH-cytochrome b-5 reductase                                   | um05038                  | 1.61E-12 | ni     | related to glycosyl transferase                                                         |
| 15000001                     | 1.31E-13 | ni     | cytochrome P450 CYP4/CYP19/CYP26 subfamilies                    | um04353                  | 1.70E-12 | ni     | putative protein                                                                        |
| 28000079                     | 1.43E-13 | ni     | non-ribosomal peptide synthetase                                | um05222                  | 1.85E-12 | ni     | conserved hypothetical protein                                                          |
| 9000004                      | 1.83E-13 | K00012 | UDP-glucose 4-epimerase                                         | um03865                  | 2.11E-12 | K00128 | probable aldehyde dehydrogenase family 7 member A1                                      |
| 3400086                      | 2.77E-13 | ni     | hypothetical protein                                            | um05812                  | 2.33E-12 | ni     | related to Cyclohexanone monooxygenase                                                  |
| 9400362                      | 3.12E-13 | ni     | hypothetical protein                                            | um03135                  | 2.37E-12 | ni     | conserved hypothetical protein                                                          |
| 22200247                     | 3.17E-13 | ni     | hypothetical protein                                            | um05421                  | 2.58E-12 | ni     | related to Multidrug resistance protein                                                 |
| 7400094                      | 4.85E-13 | ni     | FOG, Zn-finger                                                  | um05598                  | 2.89E-12 | ni     | conserved hypothetical protein                                                          |
| 27400089                     | 5.80E-13 | ni     | hypothetical protein                                            | um11403                  | 3.07E-12 | ni     | conserved hypothetical protein                                                          |
| 4000041                      | 5.90E-13 | ni     | hypothetical protein                                            | um03402                  | 3.07E-12 | K00128 | Indole-3-acetaldehyde dehydrogenase                                                     |
| 2600011                      | 6.61E-13 | ni     | hypothetical protein                                            | um11554                  | 3.34E-12 | ni     | related to Glucose oxidase                                                              |
| 1000040                      | 1.27E-12 | ni     | hypothetical protein                                            | um00025                  | 4.75E-12 | ni     | related to dehydroshikimate dehydratase                                                 |
| 27000093                     | 2.12E-12 | ni     | hypothetical protein                                            | um12172                  | 4.92E-12 | ni     | conserved hypothetical protein                                                          |
| 5000035                      | 2.72E-12 | ni     | synaptic vesicle transporter SVOP and related transporters      | um04971                  | 6.64E-12 | ni     | probable OSM1 - fumarate reductase                                                      |
| 7400263                      | 4.05E-12 | ni     | hypothetical protein                                            | um11931                  | 6.87E-12 | ni     | conserved hypothetical protein                                                          |
| 3400076                      | 5.08E-12 | ni     | predicted transporter                                           | um01723                  | 6.89E-12 | ni     | related to Cytochrome P450                                                              |
| 15000016                     | 5.73E-12 | ni     | hypothetical protein                                            | um00742                  | 8.45E-12 | ni     | probable DAL5 - Alaninate and ureidosuccinate permease                                  |
| 7400332                      | 6.11E-12 | ni     | hypothetical protein                                            | um00815                  | 8.86E-12 | ni     | related to multidrug resistant protein                                                  |
| 8400109                      | 9.89E-12 | K01175 | hypothetical protein                                            | um01165                  | 9.44E-12 | ni     | related to Glucan 1                                                                     |
| 8000087                      | 1.20E-11 | ni     | hypothetical protein                                            | um04657                  | 9.84E-12 | ni     | conserved hypothetical protein                                                          |
| 11000030                     | 1.27E-11 | ni     | hypothetical protein                                            | um06085                  | 1.02E-11 | ni     | conserved hypothetical protein                                                          |
| 19000047                     | 1.98E-11 | ni     | fatty acyl-CoA elongase                                         | um04387                  | 1.02E-11 | ni     | related to endo-1                                                                       |
| 22200088                     | 2.05E-11 | ni     | hypothetical protein                                            | um05076                  | 1.11E-11 | ni     | related to 3-carboxy-cis                                                                |
| 2400039                      | 2.13E-11 | ni     | non-ribosomal peptide synthetase                                | um00465                  | 1.13E-11 | ni     | hypothetical protein                                                                    |
| 25000028                     | 2.79E-11 | ni     | hypothetical protein                                            | um04379                  | 1.26E-11 | ni     | related to gibberellin 20-oxidase                                                       |
| 3400015                      | 3.05E-11 | ni     | transcription factor                                            | um05247                  | 1.34E-11 | ni     | related to methylcrotonyl-CoA carboxylase beta chain                                    |
| 3400005                      | 3.83E-11 | ni     | hypothetical protein                                            | um10608                  | 1.36E-11 | ni     | related to Quinate permease                                                             |
| 22200260                     | 4.09E-11 | ni     | predicted NAD-dependent oxidoreductase                          | um11179                  | 1.39E-11 | ni     | conserved hypothetical protein                                                          |
| 13400096                     | 4.46E-11 | ni     | mitochondrial oxoglutarate/malate carrier proteins              | um05079                  | 1.56E-11 | ni     | probable CTP1 - Mitochondrial citrate transporter - member of the mitochondrial carrier |
| 2800034                      | 4.55E-11 | ni     | hypothetical protein                                            | um11112                  | 1.71E-11 | ni     | related to Versicolin B synthase                                                        |
| 29400084                     | 4.88E-11 | ni     | hypothetical protein                                            | um02811                  | 1.74E-11 | ni     | related to 2                                                                            |
| 7400257                      | 4.98E-11 | ni     | hypothetical protein                                            | um02585                  | 1.79E-11 | ni     | related to TPO1 - Vacuolar polyamine-H antiporter                                       |
| 11400033                     | 5.16E-11 | ni     | hypothetical protein                                            | um05586                  | 1.96E-11 | K03381 | related to hydroxyquinol-1                                                              |
| 26400048                     | 5.55E-11 | ni     | hypothetical protein                                            | um05074                  | 2.11E-11 | ni     | probable Cytochrome P450 monooxygenase                                                  |
| 14000044                     | 7.03E-11 | ni     | hypothetical protein                                            | um00824                  | 2.41E-11 | ni     | putative protein                                                                        |
| 22200308                     | 7.29E-11 | ni     | hypothetical protein                                            | um04575                  | 2.52E-11 | ni     | conserved hypothetical protein                                                          |
| 11000028                     | 7.43E-11 | ni     | hypothetical protein                                            | um06359                  | 2.60E-11 | ni     | hypothetical protein                                                                    |
| 20000081                     | 7.84E-11 | ni     | hypothetical protein                                            | um02092                  | 2.86E-11 | ni     | hypothetical protein                                                                    |
| 12000005                     | 9.21E-11 | ni     | hypothetical protein                                            | um05493                  | 2.96E-11 | ni     | hypothetical protein                                                                    |
| 9400079                      | 9.91E-11 | ni     | hypothetical protein                                            | um10418                  | 3.05E-11 | K01183 | chitinase                                                                               |
| 9000382                      | 2.07E-10 | ni     | zinc-binding oxidoreductase                                     | um04577                  | 3.24E-11 | ni     | probable DUR3 - Urea permease                                                           |
| 1000041                      | 2.08E-10 | ni     | hypothetical protein                                            | um01898                  | 3.29E-11 | ni     | related to endo-1                                                                       |
| 6000094                      | 2.18E-10 | ni     | hypothetical protein                                            | um06453                  | 3.99E-11 | K00616 | related to Transakolase B                                                               |
| 4000028                      | 2.24E-10 | ni     | hypothetical protein                                            | um04510                  | 3.55E-11 | ni     | conserved hypothetical protein                                                          |
| 18400021                     | 2.91E-10 | ni     | lipid phosphate phosphatase and related enzymes of the PAP2 fs  | um06084                  | 3.72E-11 | ni     | conserved hypothetical protein                                                          |
| 9400174                      | 3.00E-10 | ni     | hypothetical protein                                            | um04335                  | 3.92E-11 | ni     | conserved hypothetical protein                                                          |
| 19400009                     | 3.12E-10 | K01808 | hypothetical protein                                            | um02169                  | 4.26E-11 | ni     | related to aquaporin 3                                                                  |
| 9400388                      | 3.69E-10 | ni     | multidrug resistance-associated protein                         | um01971                  | 4.50E-11 | ni     | conserved hypothetical protein                                                          |
| 16000029                     | 4.05E-10 | ni     | hypothetical protein                                            | um05528                  | 4.73E-11 | ni     | conserved hypothetical protein                                                          |
| 6400027                      | 4.22E-10 | ni     | hypothetical protein                                            | um03485                  | 4.81E-11 | ni     | conserved hypothetical protein                                                          |
| 26400075                     | 5.38E-10 | ni     | hypothetical protein                                            | um03177                  | 5.12E-11 | K03386 | related to peroxisomal membrane protein 20                                              |
| 9400040                      | 5.41E-10 | ni     | hypothetical protein                                            | um11229                  | 5.45E-11 | ni     | conserved hypothetical protein                                                          |
| 24400051                     | 7.74E-10 | ni     | predicted methyltransferase                                     | um01614                  | 5.50E-11 | ni     | conserved hypothetical protein                                                          |
| 26000094                     | 7.77E-10 | ni     | hypothetical protein                                            | um06487                  | 5.61E-11 | ni     | hypothetical protein                                                                    |
| 6400052                      | 8.25E-10 | ni     | hypothetical protein                                            | um00037                  | 6.12E-11 | ni     | conserved hypothetical protein                                                          |
| 9400088                      | 9.36E-10 | ni     | N-acetylglucosaminyltransferase complex, subunit PIG-A/SPT14    | um05170                  | 6.32E-11 | K00122 | probable formate dehydrogenase                                                          |
| 15000035                     | 1.04E-09 | ni     | hypothetical protein                                            | um11695                  | 7.21E-11 | ni     | putative protein                                                                        |
| 18000027                     | 1.06E-09 | ni     | hypothetical protein                                            | um02323                  | 8.23E-11 | K01112 | related to HOR2 - DL-glycerol phosphatase                                               |
| 6000042                      | 1.13E-09 | K00232 | iron/ascorbate family oxidoreductases                           | um03040                  | 9.74E-11 | ni     | hypothetical protein                                                                    |
| 7400078                      | 1.17E-09 | K03146 | hypothetical protein                                            | um05581                  | 1.00E-10 | K17069 | probable O-acetylhomoserine                                                             |
| 12000094                     | 1.18E-09 | ni     | hypothetical protein                                            | um11732                  | 1.01E-10 | ni     | hypothetical protein                                                                    |
| 6000016                      | 1.25E-09 | ni     | hypothetical protein                                            | um11528                  | 1.01E-10 | ni     | conserved hypothetical protein                                                          |
| 24000071                     | 1.35E-09 | K00480 | kyurenine 3-monooxygenase and related flavoprotein monooxygen   | um10208                  | 1.02E-10 | ni     | conserved hypothetical protein                                                          |
| 7400183                      | 1.44E-09 | K00234 | succinate dehydrogenase, flavoprotein subunit                   | um11118                  | 1.04E-10 | ni     | ni                                                                                      |
| 11000027                     | 1.52E-09 | ni     | acyl-coa synthetase                                             | um00968                  | 1.06E-10 | ni     | hypothetical protein                                                                    |
| 9400028                      | 1.67E-09 | ni     | hypothetical protein                                            | um01804                  | 1.10E-10 | K14265 | tytrophan amino transferase                                                             |
| 9400055                      | 2.43E-09 | K00100 | NAD dependent epimerase                                         | um05589                  | 1.11E-10 | K00540 | conserved hypothetical protein                                                          |
| 9000085                      | 3.10E-09 | ni     | hypothetical protein                                            | um10444                  | 1.22E-10 | K01501 | putative nitrilase                                                                      |
| 9000044                      | 3.63E-09 | ni     | aspartyl protease                                               | um01351                  | 1.23E-10 | ni     | putative protein                                                                        |
| 25400047                     | 3.81E-09 | K05767 | ras GTPase-activating protein family - IQGAP                    | um11781                  | 1.25E-10 | ni     | ni                                                                                      |
| 27400046                     | 5.30E-09 | ni     | hypothetical protein                                            | um04254                  | 1.37E-10 | ni     | conserved hypothetical protein                                                          |
| 14400052                     | 5.65E-09 | ni     | hypothetical protein                                            | um03556                  | 1.38E-10 | ni     | conserved hypothetical protein                                                          |
| 22400259                     | 6.27E-09 | ni     | hypothetical protein                                            | um11381                  | 1.48E-10 | ni     | conserved hypothetical protein                                                          |
| 10000037                     | 6.46E-09 | ni     | hypothetical protein                                            | um03158                  | 1.57E-10 | ni     | related to enoyl-CoA hydratase                                                          |
| 12000012                     | 6.46E-09 | ni     | hypothetical protein                                            | um02720.2                | 1.58E-10 | ni     | conserved hypothetical protein                                                          |
| 25000012                     | 7.92E-09 | ni     | hypothetical protein                                            | um03319                  | 1.63E-10 | ni     | conserved hypothetical protein                                                          |
| 9400034                      | 8.39E-09 | ni     | hypothetical protein                                            | um11651                  | 1.73E-10 | K13621 | related to Betaine lipid synthase                                                       |
| 13000095                     | 9.15E-09 | ni     | glucose dehydrogenase                                           | um01947                  | 1.77E-10 | ni     | related to cytochrome-c peroxidase precursor                                            |
| 13400087                     | 1.06E-08 | ni     | predicted seven transmembrane receptor - rhodopsin family       | um11129                  | 1.82E-10 | ni     | conserved hypothetical protein                                                          |
| 16400078                     | 1.17E-08 | K03381 | hypothetical protein                                            | um06400                  | 1.96E-10 | K00249 | conserved hypothetical protein                                                          |
| 7400181                      | 1.35E-08 | ni     | C-3 sterol dehydrogenase                                        | um02080                  | 2.00E-10 | ni     | conserved hypothetical protein                                                          |
| 7400276                      | 1.47E-08 | ni     | hypothetical protein                                            | um02701.2                | 2.07E-10 | ni     | hypothetical protein                                                                    |
| 9400084                      | 1.47E-08 | ni     | long chain fatty acid elongase                                  | um00115                  | 2.16E-10 | K00826 | probable BAT2 - branched-chain-amino-acid transaminase                                  |
| 1200108                      | 1.68E-08 | ni     | hypothetical protein                                            | um05495                  | 2.25E-10 | ni     | conserved hypothetical protein                                                          |
| 8000040                      | 1.72E-08 | K00108 | glucose dehydrogenase                                           | um04737                  | 2.27E-10 | ni     | hypothetical protein                                                                    |
| 7400288                      | 2.00E-08 | ni     | beta, beta-carotene 15,15'-dioxygenase and related enzymes      | um04629                  | 2.33E-10 | K11262 | acetyl-CoA carboxylase                                                                  |
| 7400277                      | 3.70E-08 | ni     | hypothetical protein                                            | um01588                  | 2.36E-10 | ni     | ni                                                                                      |
| 22200320                     | 3.75E-08 | K01452 | hypothetical protein                                            | um00209.2                | 2.38E-10 | ni     | putative protein                                                                        |
| 18400011                     | 3.76E-08 | K01637 | hypothetical protein                                            | um01949                  | 2.40E-10 | ni     | putative protein                                                                        |
| 27400011                     | 3.94E-08 | ni     | putative alpha 1,2 mannosyltransferase                          | um03117.2                | 2.53E-   |        |                                                                                         |

|           |          |        |                                                                 |           |          |        |                                                                                 |
|-----------|----------|--------|-----------------------------------------------------------------|-----------|----------|--------|---------------------------------------------------------------------------------|
| 24c0068   | 2.29E-07 | ni     | acyl-coa oxidase                                                | um11708   | 7.24E-10 | K07560 | related to DTD1 - D-Tyr-tRNA                                                    |
| 9600185   | 2.41E-07 | ni     | hypothetical protein                                            | um00336   | 7.93E-10 | ni     | putative protein                                                                |
| 27f00093  | 2.60E-07 | ni     | hypothetical protein                                            | um10791   | 8.52E-10 | ni     | putative protein                                                                |
| 12d00116  | 2.66E-07 | ni     | O-methyltransferase                                             | um01789   | 8.56E-10 | ni     | putative protein                                                                |
| 5e00073   | 2.83E-07 | ni     | predicted oxidoreductase                                        | um06133   | 9.69E-10 | ni     | conserved hypothetical protein                                                  |
| 6400070   | 3.21E-07 | ni     | hypothetical protein                                            | um04807   | 1.01E-09 | ni     | conserved hypothetical protein                                                  |
| 22d00016  | 3.35E-07 | ni     | hypothetical protein                                            | um00182   | 1.02E-09 | ni     | related to Lipase 2 precursor                                                   |
| 7c030235  | 3.40E-07 | ni     | hypothetical protein                                            | um06470   | 1.02E-09 | ni     | conserved hypothetical protein                                                  |
| 20d00038  | 3.59E-07 | ni     | hypothetical protein                                            | um10339   | 1.03E-09 | K00668 | related to fatty acid synthase                                                  |
| 12d00003  | 3.59E-07 | ni     | hypothetical protein                                            | um04528   | 1.06E-09 | ni     | conserved hypothetical protein                                                  |
| 9e000365  | 4.02E-07 | ni     | hypothetical protein                                            | um01805   | 1.16E-09 | ni     | conserved hypothetical protein                                                  |
| 27f00075  | 4.14E-07 | ni     | uncharacterized conserved protein                               | um11514   | 1.19E-09 | ni     | probable High-affinity glucose transporter                                      |
| 22d00236  | 4.14E-07 | ni     | enoyl-coa isomerase                                             | um11388   | 1.27E-09 | ni     | probable cytochrome b5                                                          |
| 25c00034  | 4.18E-07 | ni     | hypothetical protein                                            | um02175   | 1.27E-09 | ni     | related to 3-phlyase A precursor                                                |
| 7f00292   | 4.69E-07 | ni     | hypothetical protein                                            | um05967   | 1.28E-09 | K00480 | related to salicylate 1-monooxygenase                                           |
| 20c00080  | 4.89E-07 | ni     | multidrug resistance-associated protein                         | um00205   | 1.28E-09 | ni     | related to HSP12 - heat shock protein                                           |
| 9e000293  | 5.39E-07 | ni     | hypothetical protein                                            | um03614   | 1.32E-09 | ni     | conserved hypothetical protein                                                  |
| 20d00008  | 6.03E-07 | ni     | hypothetical protein                                            | um00005   | 1.36E-09 | K07824 | probable Benzolate 4-monooxygenase cytochrome P450                              |
| 22c00309  | 6.20E-07 | ni     | hypothetical protein                                            | um12031   | 1.42E-09 | ni     | putative protein                                                                |
| 9e00206   | 6.31E-07 | K00698 | chitin synthase/hyaluronan synthase                             | um04482   | 1.44E-09 | ni     | conserved hypothetical protein                                                  |
| 22c00122  | 6.54E-07 | ni     | hypothetical protein                                            | um19005   | 1.45E-09 | K13953 | probable ADH3 - alcohol dehydrogenase III                                       |
| 12d00013  | 6.66E-07 | K03885 | NADH-dehydrogenase                                              | um06438   | 1.46E-09 | ni     | probable                                                                        |
| 14c00051  | 7.54E-07 | ni     | hypothetical protein                                            | um02707   | 1.52E-09 | ni     | conserved hypothetical protein                                                  |
| 7f00210   | 9.29E-07 | ni     | hypothetical protein                                            | um11513   | 1.56E-09 | ni     | conserved hypothetical protein                                                  |
| 7f00362   | 9.37E-07 | ni     | predicted esterase                                              | um11116   | 1.56E-09 | ni     | conserved hypothetical Ustilago-specific protein                                |
| 9e000390  | 9.53E-07 | ni     | hypothetical protein                                            | um01466   | 1.60E-09 | ni     | related to acyl-coa dehydrogenase                                               |
| 9e000352  | 1.02E-06 | ni     | hypothetical protein                                            | um03706.2 | 1.67E-09 | ni     | conserved hypothetical protein                                                  |
| 8e00079   | 1.05E-06 | ni     | hypothetical protein                                            | um03397   | 1.78E-09 | ni     | hypothetical protein                                                            |
| 20d00033  | 1.08E-06 | K13719 | OTU-like cysteine protease                                      | um04104   | 1.83E-09 | ni     | conserved hypothetical Ustilago-specific protein                                |
| 9e000507  | 1.09E-06 | ni     | hypothetical protein                                            | um00723   | 1.92E-09 | ni     | related to stress response protein rds1p                                        |
| 12d00256  | 1.12E-06 | ni     | hypothetical protein                                            | um01107   | 1.98E-09 | K04644 | probable mitogen-activated protein kinase MpkA                                  |
| 7d00097   | 1.18E-06 | K07404 | hypothetical protein                                            | um10120   | 2.04E-09 | K00698 | chitin synthase 3                                                               |
| 11c00029  | 1.20E-06 | K07431 | cytochrome P450                                                 | um03690   | 2.08E-09 | K03458 | probable purine permease                                                        |
| 16d00068  | 1.22E-06 | K10365 | F-actin capping protein, beta subunit                           | um11654   | 2.31E-09 | ni     | putative protein                                                                |
| 22d00178  | 1.24E-06 | K01488 | adenine deaminase                                               | um00371   | 2.32E-09 | ni     | related to Opiin-1                                                              |
| 16d00017  | 1.27E-06 | K00249 | predicted acyl-CoA dehydrogenase                                | um10545   | 2.33E-09 | ni     | conserved hypothetical protein                                                  |
| 20c00017  | 1.30E-06 | ni     | hypothetical protein                                            | um03615   | 2.41E-09 | ni     | related to Glucose oxidase                                                      |
| 6e000092  | 1.48E-06 | ni     | hypothetical protein                                            | um02917   | 2.47E-09 | ni     | conserved hypothetical Ustilago-specific protein                                |
| 22d00261  | 1.59E-06 | K15532 | hypothetical protein                                            | um00738   | 2.59E-09 | ni     | conserved hypothetical protein                                                  |
| 18d00128  | 1.60E-06 | K08369 | synaptic vesicle transporter SV2                                | um00451   | 2.61E-09 | ni     | conserved hypothetical protein                                                  |
| 18d00028  | 1.60E-06 | ni     | hypothetical protein                                            | um11020   | 2.90E-09 | ni     | conserved hypothetical protein                                                  |
| 14c00004  | 1.64E-06 | ni     | multiple inositol polyphosphate phosphatase                     | um01812   | 3.01E-09 | K01078 | conserved hypothetical protein                                                  |
| 9e000258  | 1.66E-06 | ni     | hypothetical protein                                            | um04304   | 3.06E-09 | ni     | related to allantoate permease                                                  |
| 9e000376  | 1.72E-06 | K01192 | predicted beta-mannosidase                                      | um02865   | 3.16E-09 | ni     | hypothetical protein                                                            |
| 10d00008  | 1.72E-06 | K00161 | pyruvate dehydrogenase E1, alpha subunit                        | um06367   | 3.19E-09 | ni     | putative protein                                                                |
| 5e000132  | 1.83E-06 | ni     | sorting nexin SNX9/SH3PX1                                       | um03576   | 3.23E-09 | K00380 | related to MET10 - sulfite reductase flavin-binding subunit                     |
| 8e000007  | 2.02E-06 | ni     | hypothetical protein                                            | um03506   | 3.28E-09 | ni     | conserved hypothetical protein                                                  |
| 14d00060  | 2.04E-06 | ni     | sensory transduction histidine kinase                           | um02191   | 3.53E-09 | ni     | ni                                                                              |
| 5e000053  | 2.09E-06 | ni     | GTP-binding ADP-ribosylation factor-like protein ARL1           | um01858   | 3.55E-09 | K01480 | conserved hypothetical protein                                                  |
| 25d00002  | 2.10E-06 | ni     | hypothetical protein                                            | um03909   | 3.70E-09 | ni     | hypothetical protein                                                            |
| 20c00044  | 2.28E-06 | K00122 | glyoxylate/hydroxypyruvate reductase                            | um03116   | 3.72E-09 | ni     | conserved hypothetical protein                                                  |
| 14d00106  | 2.30E-06 | ni     | enoyl-coa hydratase                                             | um02747   | 3.81E-09 | ni     | conserved hypothetical protein                                                  |
| 18d00023  | 2.31E-06 | ni     | hypothetical protein                                            | um12303   | 3.89E-09 | ni     | hypothetical protein                                                            |
| 9e000392  | 2.52E-06 | ni     | hypothetical protein                                            | um00428   | 3.98E-09 | ni     | conserved hypothetical protein                                                  |
| 6d00115   | 2.62E-06 | ni     | hypothetical protein                                            | um06012   | 4.17E-09 | K16261 | probable general amino acid permease                                            |
| 22d00035  | 2.70E-06 | K00223 | sterol reductase                                                | um01508   | 4.20E-09 | K03441 | related to Aquaporin 3                                                          |
| 12d00011  | 2.75E-06 | ni     | hypothetical protein                                            | um05538   | 4.94E-09 | K06911 | related to Pinn                                                                 |
| 12d000335 | 2.93E-06 | ni     | vesicle coat complex COPI, epsilon subunit                      | um00241   | 4.97E-09 | ni     | putative protein                                                                |
| 7e00247   | 2.95E-06 | ni     | synaptic vesicle transporter SVOP and related transporters      | um10864   | 5.13E-09 | ni     | related to GNA1 - essential acetyltransferase                                   |
| 6e00122   | 3.03E-06 | ni     | predicted transporter                                           | um11580   | 5.17E-09 | ni     | retrotransposon HobS hobase                                                     |
| 6e000008  | 3.12E-06 | K00480 | hypothetical protein                                            | um11506   | 5.23E-09 | ni     | putative protein                                                                |
| 9e000317  | 3.17E-06 | ni     | hypothetical protein                                            | um02872   | 5.24E-09 | K00108 | related to gmc type oxidoreductase                                              |
| 16c00073  | 3.17E-06 | ni     | AAA-type ATPase                                                 | um02207   | 5.45E-09 | ni     | conserved hypothetical protein                                                  |
| 14c00104  | 3.23E-06 | ni     | molybdenum cofactor sulfurase                                   | um11068   | 5.52E-09 | ni     | related to Copper amine oxidase 1                                               |
| 7f00252   | 3.26E-06 | K00249 | medium-chain acyl-CoA dehydrogenase                             | um04145   | 5.68E-09 | ni     | conserved hypothetical Ustilago-specific protein                                |
| 5e00132   | 3.56E-06 | ni     | vacuolar protein sorting-associated protein                     | um03978   | 5.80E-09 | ni     | hypothetical protein                                                            |
| 22d00203  | 3.72E-06 | ni     | hypothetical protein                                            | um12920   | 5.83E-09 | ni     | conserved hypothetical protein                                                  |
| 9e000071  | 3.69E-06 | ni     | hypothetical protein                                            | um02801   | 6.23E-09 | K00262 | probable NADP-specific glutamate dehydrogenase                                  |
| 6e000090  | 3.71E-06 | ni     | hypothetical protein                                            | um00196   | 6.57E-09 | K07034 | probable FUN34 - transmembrane protein involved in ammonia production           |
| 16d00070  | 3.74E-06 | ni     | hypothetical protein                                            | um00955   | 7.20E-09 | K00507 | probable stearyl-CoA desaturase                                                 |
| 8e000001  | 3.85E-06 | ni     | hypothetical protein                                            | um01951   | 7.35E-09 | ni     | related to RRP1 - involved in processing rRNA precursor species to mature rRNAs |
| 13c00037  | 4.06E-06 | ni     | hypothetical protein                                            | um10189   | 7.36E-09 | ni     | ferrichrome siderophore peptide synthetase                                      |
| 14d00041  | 4.08E-06 | K09051 | transcriptional activator FOSB/c-Fos                            | um03559   | 7.46E-09 | ni     | related to beta-1                                                               |
| 8d000053  | 4.16E-06 | ni     | amino acid transporters                                         | um03689   | 7.93E-09 | ni     | conserved hypothetical protein                                                  |
| 18d00076  | 4.70E-06 | ni     | hypothetical protein                                            | um11450   | 8.59E-09 | ni     | Hgl1p                                                                           |
| 16c00063  | 5.10E-06 | K01338 | mitochondrial ATP-dependent protease PIM1/LON                   | um04181   | 8.80E-09 | ni     | conserved hypothetical protein                                                  |
| 22c00121  | 5.10E-06 | ni     | predicted transporter                                           | um05507   | 8.84E-09 | ni     | conserved hypothetical protein                                                  |
| 24c00011  | 5.10E-06 | ni     | hypothetical protein                                            | um10464   | 1.00E-08 | ni     | putative protein                                                                |
| 27c00005  | 5.20E-06 | ni     | hypothetical protein                                            | um10518   | 1.06E-08 | ni     | ni                                                                              |
| 10c00070  | 5.25E-06 | ni     | hypothetical protein                                            | um03821   | 1.10E-08 | K03293 | probable lysine-specific permease                                               |
| 15c00036  | 5.27E-06 | K00637 | sterol O-acyltransferase                                        | um01171   | 1.12E-08 | ni     | related to 4-coumarate-CoA ligase                                               |
| 3d000095  | 5.35E-06 | K00643 | 5-aminolevulinate synthase                                      | um04347   | 1.14E-08 | ni     | probable isp4 - oligopeptide transporter                                        |
| 20d00069  | 5.41E-06 | ni     | hypothetical protein                                            | um10816   | 1.14E-08 | ni     | conserved hypothetical protein                                                  |
| 19c00002  | 5.59E-06 | ni     | hypothetical protein                                            | um03415   | 1.19E-08 | K03379 | related to putative monooxygenase                                               |
| 14d00094  | 5.62E-06 | ni     | transporter ABC superfamily                                     | um02704   | 1.28E-08 | ni     | related to allantoate permease                                                  |
| 20d00043  | 5.79E-06 | ni     | hypothetical protein                                            | um06456   | 1.29E-08 | ni     | related to aminopeptidase Y precursor                                           |
| 22d00239  | 5.92E-06 | ni     | hypothetical protein                                            | um11448   | 1.35E-08 | K03941 | probable NADH-ubiquinone oxidoreductase 23 kDa subunit precursor                |
| 7f000041  | 6.09E-06 | ni     | mitochondrial ribosomal protein S10                             | um05550   | 1.38E-08 | ni     | related to EXG1 - exo-beta-1                                                    |
| 12d00001  | 6.25E-06 | K11611 | hypothetical protein                                            | um05019   | 1.46E-08 | K00789 | probable SAH2 - S-adenosylmethionine synthetase 2                               |
| 5d000024  | 6.78E-06 | ni     | hypothetical protein                                            | um05036   | 1.48E-08 | ni     | related to endo-1                                                               |
| 7f000311  | 6.91E-06 | ni     | hypothetical protein                                            | um01182   | 1.50E-08 | ni     | ni                                                                              |
| 7e000003  | 7.11E-06 | ni     | multicopper oxidases                                            | um03398   | 1.51E-08 | ni     | related to transsterase                                                         |
| 6d00046   | 7.67E-06 | K01194 | neutral trehalase                                               | um02746   | 1.54E-08 | ni     | hypothetical protein                                                            |
| 5e001159  | 7.87E-06 | ni     | hypothetical protein                                            | um05309   | 1.71E-08 | K14649 | related to RRP1 - involved in processing rRNA precursor species to mature rRNAs |
| 3c000057  | 7.90E-06 | ni     | hypothetical protein                                            | um11815.2 | 1.80E-08 | ni     | hypothetical protein                                                            |
| 9d00241   | 8.53E-06 | ni     | hypothetical protein                                            | um03139   | 1.81E-08 | ni     | conserved hypothetical protein                                                  |
| 27d00028  | 8.54E-06 | ni     | hypothetical protein                                            | um01213   | 1.82E-08 | ni     | conserved hypothetical protein                                                  |
| 26c00043  | 9.13E-06 | ni     | tyrosine kinase specific for activated                          | um03694.2 | 1.90E-08 | ni     | conserved hypothetical protein                                                  |
| 9e000329  | 9.15E-06 | K12795 | suppressor of G2 allele of skp1                                 | um00316   | 1.91E-08 | ni     | conserved hypothetical protein                                                  |
| 13d00001  | 9.22E-06 | ni     | predicted transporter                                           | um05972   | 1.94E-08 | K08141 | probable Maltose permease                                                       |
| 8d000002  | 9.42E-06 | ni     | hypothetical protein                                            | um01434   | 2.01E-08 | ni     | siderophore peptide synthetase involved in ferrichromeA biosynthesis            |
| 5e000004  | 9.51E-06 | ni     | glucose dehydrogenase                                           | um02286   | 2.04E-08 | ni     | conserved hypothetical protein                                                  |
| 24c00004  | 1.02E-05 | ni     | hypothetical protein                                            | um04247   | 2.06E-08 | ni     | related to Chromiesterase precursor                                             |
| 3d00101   | 1.03E-05 | ni     | hypothetical protein                                            | um02371   | 2.09E-08 | ni     | related to serine                                                               |
| 9e002008  | 1.04E-05 | ni     | hypothetical protein                                            | um03563   | 2.09E-08 | ni     | conserved hypothetical protein                                                  |
| 20d00067  | 1.19E-05 | ni     | 3-Methylcrotonyl-CoA carboxylase, non-biotin containing subunit | um10188   | 2.14E-08 | ni     | L-ornithine N5-oxygenase                                                        |
| 3e000075  | 1.19E-05 | ni     | hypothetical protein                                            | um06125   | 2.17E-08 | ni     | putative protein                                                                |
| 7f001184  | 1.21E-05 | ni     | hypothetical protein                                            | um11321   | 2.29E-08 | ni     | ni                                                                              |
| 6d000082  | 1.34E-05 | K00006 | sorbitol dehydrogenase                                          | um11610   | 2.33E-08 | ni     | conserved hypothetical protein                                                  |
| 26c00080  | 1.36E-05 | ni     | hypothetical protein                                            | um04123   | 2.52E-08 | ni     | ni                                                                              |
| 22d00033  | 1.40E-05 | ni     | hypothetical protein                                            | um02208   | 2.55E-08 | K00232 | probable acyl-CoA oxidase                                                       |
| 9e000359  | 1.48E-05 | ni     | hypothetical protein                                            | um00813   | 2.67E-08 | ni     | conserved hypothetical protein                                                  |
| 6e000015  | 1.58E-05 | K10578 | non-canonical ubiquitin conjugating enzyme 1                    | um04107   | 2.79E-08 | ni     | related to Phenol 2-monooxygenase                                               |
| 22c00153  | 1.59E-05 | ni     | hypothetical protein                                            | um11434   | 2.87E-08 | ni     | hypothetical protein                                                            |
| 19d00036  | 1.61E-05 | ni     | multidrug resistance-associated protein                         | um05414   | 2.89E-08 | ni     | probable aflatoxin efflux pump AFLT                                             |
| 9e000117  | 1.62E-05 | K01126 | glucosyl-acyl diester phosphodiesterase                         | um05811   | 2.90E-08 | K00873 | probable pyruvate kinase                                                        |
| 7d00206   | 1.64E-05 | K01669 | deoxyribopyrimidine photolase                                   | um05811   | 3.08E-08 | ni     | related to KRE6 - glucan synthase subunit                                       |
| 8e00120   | 1.70E-05 | ni     | cytochrome P450 CYP3/CYP5/CYP6/CYP9 subfamilies                 | um02459   | 3.08E-08 | ni     | related to neutral amino acid permease                                          |
| 5d00135   | 1.72E-05 | ni     | hypothetical protein                                            | um04696   | 3.09E-08 | ni     | putative protein                                                                |
| 7d00359   | 1.76E-05 | ni     | synaptic vesicle transporter SVOP and related transporters      | um01232   | 3.20E-08 | K01372 | related to LAF3 - member of the GAL regulon                                     |
| 27d00074  | 1.84E-05 | ni     | acetylcholinesterase                                            | um03935   | 3.31E-08 | K00309 | related to fucose1 amino acid oxidase                                           |
| 25c00080  | 1.89E-05 | ni     | hypothetical protein                                            | um06078   | 3.38E-08 | K01210 | conserved hypothetical protein                                                  |
| 2d000014  | 1.97E-05 | K02357 | hypothetical protein                                            | um02809   | 3.45E-08 | K04618 | probable galactose oxidase precursor                                            |
| 20d00016  | 2.02E-05 | K07973 | hypothetical protein                                            | um05751   | 3.64E-08 | ni     | ni                                                                              |
| 12c00001  | 2.02E-05 | ni     | hypothetical protein                                            | um11178   | 3.65E-08 | ni     | probable AYT1 - trichothecene 3-O-acetyltransferase                             |
| 1d000007  | 2.07E-05 | ni     | hypothetical protein                                            | um02023   | 3.77E-08 | ni     | related to long chain fatty alcohol oxidase                                     |
| 4d000042  | 2.09E-05 | K01720 | hypothetical protein                                            | um11569   | 3.90E-08 | ni     | related to MKC7 - aspartyl protease of the periplasmic space                    |
| 1e000017  | 2.10E-05 | ni     | hypothetical protein                                            | um12080   | 3.92E-08 | ni     | related to PNS1 - Protein of unknown function                                   |
| 3d00016   | 2.13E-05 | K00232 | acyl-coa oxidase                                                | um03325   | 3.95E-08 | K16261 | probable general amino acid permease                                            |
| 19c00099  | 2.23E-05 | ni     | component of vacuolar transporter chaperone                     | um03561   | 4.21E-08 | ni     | conserved hypothetical protein                                                  |
| 8e000073  | 2.33E-05 | ni     | hypothetical protein                                            | um06203   | 4.23E-08 | ni     | ni                                                                              |
| 5e000046  | 2.36E-05 | ni     | hypothetical protein                                            | um03882   | 4.31E-08 | ni     | ni                                                                              |
| 27d00079  | 2.55E-05 | ni     | hypothetical protein                                            | um06190   | 4.33E-08 | ni     | related to Chitinase                                                            |
| 20c00026  | 2.62E-05 | ni     | hypothetical protein                                            | um04445   | 4.44E-08 | ni     | related to ANT1 - Peroxisomal transporter of adenine nucleotides                |
| 10c00095  | 2.66E-05 | K03800 | lipote-protein ligase A                                         | um06485   | 4.58E-08 | ni     | putative protein                                                                |
| 9e000062  | 2.74E-05 | K01423 | hypothetical protein                                            | um        |          |        |                                                                                 |

|          |          |        |                                                                    |           |          |        |                                                                                    |
|----------|----------|--------|--------------------------------------------------------------------|-----------|----------|--------|------------------------------------------------------------------------------------|
| 3c00063  | 3.84E-05 | ni     | glyoxylate/hydroxypruvate reductase                                | um11015   | 8.61E-08 | ni     | conserved hypothetical protein                                                     |
| 7600165  | 3.67E-05 | K04043 | molecular chaperones mortalin/PBP74/GRP75                          | um10691.2 | 8.67E-08 | K01897 | related to Long-chain-fatty-acyl-CoA ligase                                        |
| 6600556  | 4.12E-05 | ni     | hypothetical protein                                               | um02161   | 8.82E-08 | ni     | conserved hypothetical protein                                                     |
| 6c00353  | 4.33E-05 | K00020 | predicted dehydrogenase                                            | um33620   | 9.11E-08 | ni     | related to Regulatory protein acR                                                  |
| 19d0046  | 4.40E-05 | K12486 | predicted GTPase-activating protein                                | um11775   | 9.49E-08 | ni     | putative protein                                                                   |
| 7c02729  | 4.42E-05 | ni     | predicted inosine-uridine preferring nucleoside hydrolase          | um00079   | 9.70E-08 | K00100 | conserved hypothetical protein                                                     |
| 9c00232  | 4.45E-05 | K10589 | E3 ubiquitin protein ligase                                        | um10897   | 9.79E-08 | ni     | ni                                                                                 |
| 14c00227 | 4.58E-05 | ni     | hypothetical protein                                               | um01478   | 9.92E-08 | ni     | related to HXT1 - Low-affinity hexose facilitator                                  |
| 9c00270  | 4.68E-05 | ni     | hypothetical protein                                               | um04912   | 1.01E-07 | ni     | putative protein                                                                   |
| 24c00071 | 4.79E-05 | K13535 | predicted hydrolase/acyltransferase                                | um01585   | 1.01E-07 | ni     | ni                                                                                 |
| 16c00005 | 4.91E-05 | ni     | hypothetical protein                                               | um10223   | 1.10E-07 | ni     | ni                                                                                 |
| 14c00100 | 4.95E-05 | K11273 | helicase of DEAD superfamily                                       | um01930   | 1.15E-07 | ni     | probable POT1 - acetyl-CoA C-acyltransferase                                       |
| 7c00046  | 5.17E-05 | K11434 | protein arginine N-methyltransferase PRMT1 and related enzyme      | um10388   | 1.17E-07 | ni     | putative protein                                                                   |
| 8d00010  | 5.19E-05 | K00380 | NADP/FAD dependent oxidoreductase                                  | um03470   | 1.21E-07 | K01537 | related to putative calcium P-type ATPase NCA-2                                    |
| 8d00019  | 5.21E-05 | ni     | cytochrome P450 CYP3/CYP5/CYP6/CYP9 subfamilies                    | um11744   | 1.22E-07 | K00236 | related to SDH3 - cytochrome b560 subunit of respiratory complex II                |
| 19d00057 | 5.40E-05 | K03255 | uncharacterized protein CLU1/cuA1/TF131                            | um04410   | 1.26E-07 | ni     | probable siderophore iron transporter mirC                                         |
| 16c00062 | 5.42E-05 | K11756 | chromatin remodeling complex RSC, subunit RSC1                     | um04106   | 1.29E-07 | ni     | related to O-methyltransferase B                                                   |
| 3c00003  | 5.54E-05 | K00026 | NAD-dependent malate dehydrogenase                                 | um01599   | 1.27E-07 | ni     | related to EC1 - delta3-cis-delta2-trans-enoyl-CoA isomerase                       |
| 6c00089  | 5.57E-05 | ni     | hypothetical protein                                               | um02508   | 1.28E-07 | K00128 | indole-3-acetaldehyde dehydrogenase                                                |
| 10c00045 | 5.57E-05 | ni     | glycosyl transferase                                               | um11777   | 1.31E-07 | ni     | conserved hypothetical protein                                                     |
| 6c00069  | 5.77E-05 | ni     | Ca2+-dependent lipid-binding protein CLB1                          | um05325   | 1.34E-07 | ni     | conserved hypothetical protein                                                     |
| 18c00334 | 5.82E-05 | ni     | hypothetical protein                                               | um03508   | 1.40E-07 | ni     | conserved hypothetical protein                                                     |
| 9c00061  | 5.84E-05 | ni     | hypothetical protein                                               | um00573   | 1.44E-07 | ni     | conserved hypothetical protein                                                     |
| 6d00102  | 6.00E-05 | ni     | hypothetical protein                                               | um01583   | 1.45E-07 | ni     | ni                                                                                 |
| 10d00051 | 6.00E-05 | ni     | hypothetical protein                                               | um03990   | 1.46E-07 | ni     | related to Short-chain dehydrogenase                                               |
| 3c00050  | 6.03E-05 | ni     | fumate reductase, flavoprotein subunit                             | um05025   | 1.47E-07 | ni     | conserved hypothetical protein                                                     |
| 3c00008  | 6.28E-05 | ni     | synaptic vesicle transporter SVOP and related transporters         | um01827   | 1.50E-07 | K01078 | related to acid phosphatase ACP2 precursor                                         |
| 9c00285  | 6.34E-05 | K14573 | nucleolar protein fibrillarin NOP77                                | um06500   | 1.58E-07 | ni     | conserved hypothetical Ustilago-specific protein                                   |
| 7d00015  | 6.45E-05 | ni     | hypothetical protein                                               | um05766   | 1.62E-07 | ni     | probable YH2 - Protein of the mitochondrial carrier family                         |
| 5d00096  | 6.63E-05 | K01103 | fructose-6-phosphate 2-kinase                                      | um10540   | 1.69E-07 | ni     | related to blue-light-inducible Bli-3 protein                                      |
| 7d00006  | 6.74E-05 | K02355 | mitochondrial elongin factor                                       | um16485   | 1.71E-07 | ni     | ni                                                                                 |
| 14d00079 | 6.82E-05 | K01743 | hypothetical protein                                               | um03372   | 1.75E-07 | ni     | conserved hypothetical protein                                                     |
| 21c00001 | 6.93E-05 | ni     | hypothetical protein                                               | um10083   | 1.77E-07 | ni     | ni                                                                                 |
| 13d00014 | 7.17E-05 | K05012 | Cl- channel CLC-3 and related proteins                             | um04530   | 1.79E-07 | ni     | probable GGC1 - Protein of the mitochondrial carrier family                        |
| 5c00060  | 7.48E-05 | K01681 | acetate acetyltransferase                                          | um00229   | 1.84E-07 | ni     | hypothetical protein                                                               |
| 6d00060  | 7.74E-05 | ni     | hypothetical protein                                               | um00970   | 2.02E-07 | ni     | conserved hypothetical Ustilago-specific protein                                   |
| 2d00069  | 8.23E-05 | ni     | hypothetical protein                                               | um05339   | 2.19E-07 | K01834 | probable 2                                                                         |
| 19d00126 | 8.25E-05 | K00972 | UDP-N-acetylglucosamine pyrophosphorylase                          | um11562   | 2.21E-07 | ni     | hydrophobin 2                                                                      |
| 9d00068  | 8.30E-05 | ni     | hypothetical protein                                               | um11502   | 2.24E-07 | K01520 | probable DUTP pyrophosphatase                                                      |
| 14d00119 | 8.52E-05 | ni     | uncharacterized conserved protein                                  | um00164.2 | 2.32E-07 | K13091 | related to splicing factor HCC1                                                    |
| 27d00097 | 8.69E-05 | ni     | hypothetical protein                                               | um01726   | 2.36E-07 | K00860 | probable MET14 - ATP adenosine-5                                                   |
| 15c00003 | 8.70E-05 | ni     | hypothetical protein                                               | um12173   | 2.41E-07 | ni     | putative protein                                                                   |
| 8d00112  | 8.91E-05 | ni     | copper amine oxidase                                               | um03977   | 2.44E-07 | ni     | conserved hypothetical protein                                                     |
| 9c00105  | 8.95E-05 | ni     | hypothetical protein                                               | um03693   | 2.54E-07 | K03457 | probable uracil permease                                                           |
| 10d00013 | 9.26E-05 | K10534 | cytochrome b5                                                      | um02416   | 2.54E-07 | ni     | conserved hypothetical protein                                                     |
| 8d00008  | 9.27E-05 | K00626 | acetyl-coa acetyltransferase                                       | um04742   | 2.57E-07 | ni     | related to stomatin                                                                |
| 14c00062 | 9.51E-05 | K01493 | deoxycytidylate deaminase                                          | um12178   | 2.57E-07 | K14333 | related to 5-carboxyvanillate decarboxylase                                        |
| 9d00058  | 9.57E-05 | K00863 | dihydroxyacetone kinase                                            | um02172   | 2.61E-07 | ni     | related to methylglyoxal reductase                                                 |
| 7d00088  | 9.66E-05 | ni     | hypothetical protein                                               | um04616   | 2.66E-07 | ni     | ni                                                                                 |
| 9d00045  | 9.76E-05 | ni     | synaptic vesicle transporter SV2                                   | um11940   | 2.80E-07 | ni     | putative protein                                                                   |
| 5c00074  | 9.91E-05 | K16302 | predicted membrane protein                                         | um00825   | 2.83E-07 | ni     | conserved hypothetical Ustilago-specific protein                                   |
| 25c00060 | 0.0001   | ni     | sorbitol dehydrogenase                                             | um04165   | 2.86E-07 | K10740 | related to single-stranded dna binding protein 12k chain                           |
| 15c00028 | 0.0001   | ni     | hypothetical protein                                               | um02198   | 2.89E-07 | ni     | conserved hypothetical protein                                                     |
| 3c00033  | 0.0001   | K00326 | inositol polyphosphate multikinase, component of the ARGR trans    | um01591   | 2.96E-07 | ni     | ni                                                                                 |
| 12c00014 | 0.0001   | ni     | hypothetical protein                                               | um03522   | 3.00E-07 | ni     | related to UGA4 - GABA permease - also involved in delta-aminolevulinatc transport |
| 9c00118  | 0.0001   | K02910 | 60S ribosomal protein L31                                          | um00708   | 3.04E-07 | ni     | related to monoxygenase                                                            |
| 22c00226 | 0.0001   | ni     | predicted hydrolases or acyltransferases                           | um10519   | 3.17E-07 | ni     | putative protein                                                                   |
| 9c00084  | 0.0001   | ni     | hypothetical protein                                               | um01710   | 3.19E-07 | ni     | related to N-carbamoyl-L-amino acid hydrolase                                      |
| 7c00056  | 0.0001   | K03661 | vacuolar H+-ATPase VO sector, subunit c'                           | um11984   | 3.39E-07 | ni     | conserved hypothetical protein                                                     |
| 24d00021 | 0.0001   | K00257 | short-chain acyl-CoA dehydrogenase                                 | um02012   | 3.57E-07 | ni     | conserved hypothetical protein                                                     |
| 9d00018  | 0.0001   | ni     | aldehyde reductase                                                 | um06098   | 3.58E-07 | ni     | related to extracellular elastolytic metalloproteinase precursor                   |
| 9c00054  | 0.0001   | ni     | hypothetical protein                                               | um03049   | 3.74E-07 | K07119 | related to ardo-polygalacturonase                                                  |
| 18c00006 | 0.0001   | ni     | non-ribosomal peptide synthetase                                   | um03228   | 3.76E-07 | ni     | related to 4-coumarate--CoA ligase 1                                               |
| 22c00214 | 0.0002   | ni     | hypothetical protein                                               | um05514   | 3.77E-07 | ni     | conserved hypothetical protein                                                     |
| 27c00066 | 0.0002   | ni     | hypothetical protein                                               | um01335   | 3.78E-07 | K00252 | probable glutaryl-CoA dehydrogenase                                                |
| 20d00051 | 0.0002   | ni     | uncharacterized conserved protein HEN1/CORYMBOSA2                  | um01432   | 3.93E-07 | ni     | related to N6-hydroxylysine acetyl transferase                                     |
| 20d00030 | 0.0002   | ni     | hypothetical protein                                               | um03989   | 3.94E-07 | K01758 | related to CYS3 - cystathionine gamma-lyase                                        |
| 27d00101 | 0.0003   | ni     | hypothetical protein                                               | um01422   | 3.97E-07 | ni     | probable Lipase B precursor                                                        |
| 9c00400  | 0.0003   | K01679 | fumarase                                                           | um06490   | 4.00E-07 | K08176 | probable PHO8 - Inorganic phosphate permease                                       |
| 9c00074  | 0.0003   | ni     | permease of the major facilitator superfamily                      | um05958   | 4.27E-07 | ni     | probable maltose permease                                                          |
| 9d00197  | 0.0003   | ni     | hypothetical protein                                               | um04615   | 4.42E-07 | ni     | ni                                                                                 |
| 9c00281  | 0.0004   | ni     | hypothetical protein                                               | um00479   | 4.78E-07 | ni     | related to 4-coumarate--CoA ligase                                                 |
| 9c00100  | 0.0004   | ni     | predicted proline-serine-threonine phosphatase-interacting protein | um10888   | 4.92E-07 | ni     | putative protein                                                                   |
| 3c00001  | 0.0004   | ni     | hypothetical protein                                               | um11531   | 4.98E-07 | ni     | ni                                                                                 |
| 19d00020 | 0.0004   | ni     | predicted membrane protein                                         | um05396.2 | 5.69E-07 | ni     | conserved hypothetical protein                                                     |
| 11d00078 | 0.0005   | ni     | hypothetical protein                                               | um04897   | 5.75E-07 | ni     | conserved hypothetical protein                                                     |
| 11d00075 | 0.0005   | ni     | hypothetical protein                                               | um03734   | 5.80E-07 | K01251 | probable adenosylhomocysteinase                                                    |
| 5c00122  | 0.0005   | ni     | hypothetical protein                                               | um12127   | 5.84E-07 | ni     | hypothetical protein                                                               |
| 24d00012 | 0.0005   | ni     | acyl-coa synthetase                                                | um01755   | 5.90E-07 | ni     | putative protein                                                                   |
| 9c00378  | 0.0005   | ni     | protein kinase                                                     | um05370   | 6.33E-07 | ni     | putative protein                                                                   |
| 11c00014 | 0.0005   | K09510 | molecular chaperone                                                | um10861   | 6.34E-07 | ni     | related to Reticuline oxidase precursor                                            |
| 12d00012 | 0.0005   | ni     | GTP-binding protein                                                | um00108   | 6.37E-07 | ni     | related to D-arabinol 2-dehydrogenase                                              |
| 3c00018  | 0.0005   | ni     | hypothetical protein                                               | um02235   | 6.38E-07 | ni     | related to AMP-binding protein                                                     |
| 7d00005  | 0.0005   | ni     | FOG, Zn-finger                                                     | um00330   | 6.50E-07 | ni     | related to UTR2 - cell wall protein                                                |
| 14d00036 | 0.0005   | ni     | polyubiquitin-binding protein                                      | um05871   | 6.68E-07 | K00818 | related to acetylcholine aminotransferase precursor                                |
| 18c00031 | 0.0006   | ni     | hypothetical protein                                               | um03568   | 6.69E-07 | ni     | related to regulatory protein acR                                                  |
| 16c00012 | 0.0006   | K01897 | long-chain acyl-CoA synthetases                                    | um01859   | 6.73E-07 | ni     | related to ribitol kinase                                                          |
| 9d00328  | 0.0006   | ni     | ATP-dependent RNA helicase pitchoune                               | um01192   | 6.85E-07 | ni     | conserved hypothetical protein                                                     |
| 25c00043 | 0.0007   | K00166 | pyridine nucleotide alpha-keto acid dehydrogenase complex, alpha s | um00922   | 7.29E-07 | ni     | conserved hypothetical protein                                                     |
| 18c00018 | 0.0007   | ni     | FOG, Zn-finger                                                     | um11038   | 7.34E-07 | K03940 | probable NADH-ubiquinone oxidoreductase 19                                         |
| 7c00106  | 0.0007   | K04371 | mitogen-activated protein kinase                                   | um01747   | 7.56E-07 | ni     | ni                                                                                 |
| 16d00050 | 0.0008   | K12604 | negative regulator of transcription                                | um12144   | 7.56E-07 | ni     | conserved hypothetical Ustilago-specific protein                                   |
| 22c00252 | 0.0008   | K01637 | isocitrate lyase                                                   | um05652   | 7.64E-07 | ni     | putative protein                                                                   |
| 9c00040  | 0.0008   | ni     | hypothetical protein                                               | um11070   | 7.71E-07 | K01175 | probable lipase precursor                                                          |
| 9d00152  | 0.0009   | K10102 | biotin synthase                                                    | um03032   | 7.84E-07 | ni     | conserved hypothetical protein                                                     |
| 12c00120 | 0.0009   | ni     | hypothetical protein                                               | um02201.2 | 7.92E-07 | ni     | conserved hypothetical protein                                                     |
| 25c00002 | 0.0009   | ni     | dehydrogenases with different specificities                        | um01005   | 8.08E-07 | K01648 | probable ATP citrate lyase subunit 1                                               |
| 13c00043 | 0.0009   | K03575 | ATG-dependent RNA helicase                                         | um11633   | 8.49E-07 | ni     | related to glucose 1-dehydrogenase                                                 |
| 5c00163  | 0.0009   | ni     | hypothetical protein                                               | um00802   | 8.69E-07 | ni     | putative protein                                                                   |
| 9c00076  | 0.0002   | ni     | cell division control protein                                      | um04871   | 8.74E-07 | K00927 | probable PGK1 - phosphoglycerate kinase                                            |
| 7d00081  | 0.0002   | ni     | hypothetical protein                                               | um11750   | 8.76E-07 | K10807 | probable RNR1 - ribonucleotide-diphosphate reductase large subunit                 |
| 20c00066 | 0.0002   | K16261 | amino acid transporters                                            | um04088   | 9.11E-07 | ni     | conserved hypothetical Ustilago-specific protein                                   |
| 19c00069 | 0.0002   | K15424 | protein phosphatase 2A regulatory subunit A and related proteins   | um00330   | 9.17E-07 | ni     | putative protein                                                                   |
| 27c00012 | 0.0002   | ni     | hypothetical protein                                               | um01647   | 9.20E-07 | K03363 | related to CDC20 - cell division control protein                                   |
| 16d00056 | 0.0002   | K08838 | serine/threonine protein kinase                                    | um00397   | 9.28E-07 | ni     | putative protein                                                                   |
| 5c00035  | 0.0002   | ni     | hypothetical protein                                               | um11007   | 9.38E-07 | ni     | related to GTP-binding protein Rab5c                                               |
| 22d00288 | 0.0002   | ni     | FOG, Reverse transcriptase                                         | um00393   | 9.45E-07 | ni     | conserved hypothetical protein                                                     |
| 7c00050  | 0.0002   | ni     | hypothetical protein                                               | um10032   | 9.47E-07 | ni     | related to N-acetyltransferase                                                     |
| 11c00035 | 0.0002   | ni     | hypothetical protein                                               | um10904   | 9.49E-07 | K00759 | probable APT1 - adenine phosphoribosyltransferase                                  |
| 26c00021 | 0.0002   | K08835 | ste20-like serine/threonine protein kinase                         | um12024   | 9.54E-07 | ni     | putative protein                                                                   |
| 22d00260 | 0.0002   | ni     | hypothetical protein                                               | um01792   | 9.59E-07 | ni     | conserved hypothetical protein                                                     |
| 9c00051  | 0.0002   | ni     | hypothetical protein                                               | um00111   | 1.00E-06 | ni     | related to membrane protein                                                        |
| 9d00087  | 0.0002   | ni     | uncharacterized conserved protein WDR8                             | um11147   | 1.04E-06 | ni     | conserved hypothetical Ustilago-specific protein                                   |
| 11c00083 | 0.0002   | K10082 | lectin VIP3b                                                       | um02052   | 1.06E-06 | ni     | related to white collar 1 protein                                                  |
| 2c00009  | 0.0002   | ni     | hypothetical protein                                               | um00667   | 1.09E-06 | ni     | related to B2-aldehyde-forming enzyme                                              |
| 12c00114 | 0.0002   | ni     | ribosomal RNA adenosine dimethylase                                | um02623   | 1.10E-06 | ni     | probable FAT1 - Long-chain fatty acid transporter                                  |
| 9c00348  | 0.0002   | ni     | hypothetical protein                                               | um06422   | 1.13E-06 | ni     | conserved hypothetical protein                                                     |
| 22d00133 | 0.0002   | ni     | glucose dehydrogenase                                              | um05997   | 1.16E-06 | ni     | putative protein                                                                   |
| 13c00070 | 0.0002   | ni     | predicted peptidyl-RNA hydrolase                                   | um11870   | 1.18E-06 | ni     | putative protein                                                                   |
| 9d00012  | 0.0002   | ni     | hormone-sensitive lipase HSL                                       | um05664   | 1.18E-06 | ni     | related to Cytochrome P450                                                         |
| 22c00012 | 0.0002   | ni     | acyl-coa synthetase                                                | um02095   | 1.20E-06 | ni     | putative protein                                                                   |
| 11c00077 | 0.0002   | ni     | myosin regulatory light chain                                      | um12027   | 1.32E-06 | ni     | putative protein                                                                   |
| 20d00059 | 0.0003   | K08794 | Ca2+/calmodulin-dependent protein kinase                           | um05521   | 1.34E-06 | ni     | conserved hypothetical protein                                                     |
| 7c00343  | 0.0003   | ni     | reductases with broad range of substrate specificities             | um05953   | 1.34E-06 | ni     | putative protein                                                                   |
| 7c00197  | 0.0003   | K00383 | pyridine nucleotide-disulphide oxidoreductase                      | um11764   | 1.39E-06 | ni     | ni                                                                                 |
| 15d00008 | 0.0003   | K02896 | 60S ribosomal protein L30 isolog                                   | um10815   | 1.41E-06 | ni     | conserved hypothetical protein                                                     |
| 11d00061 | 0.0003   | ni     | protein containing adaptin N-terminal region                       | um06010   | 1.44E-06 | K01702 | alpha-isopropylmalate isomerase                                                    |
| 8c00002  | 0.0003   | ni     | hypothetical protein                                               | um04484   | 1.44E-06 | ni     | probable choline-sulfatase                                                         |
| 18d00071 | 0.0003   | ni     | hypothetical protein                                               | um00534   | 1.46E-06 | K00549 | probable MET6 - methionine synthase                                                |
| 10d00025 | 0.0003   | ni     | hypothetical protein                                               | um04873   | 1.58E-06 | K06824 | probable LYS12 - homo-isocitrate dehydrogenase                                     |
| 6c00107  | 0.0003   | ni     | hypothetical protein                                               | um03474   | 1.59E-06 | ni     | conserved hypothetical protein                                                     |
| 26d00092 | 0.0003   | K00618 | acetylglutamate kinase                                             | um01952   | 1.62E-06 | K13281 | related to UV-endonuclease UVE-1                                                   |
| 6d00049  | 0.0003   | ni     | hypothetical protein                                               | um10486   | 1.63E-06 | ni     | conserved hypothetical Ustilago-specific protein                                   |
| 22d00282 | 0.0003   | ni     | hypothetical protein                                               | um01032   | 1.65E-06 | ni     | putative protein                                                                   |
| 13d00081 | 0.0003   | ni     | hypothetical protein                                               | um05248   | 1.65E-06 | ni     | related to TPO3 - Polyamine transport protein                                      |
| 9d00156  | 0.0003   | ni     |                                                                    |           |          |        |                                                                                    |

|          |         |        |                                                                    |         |            |         |                                                                                                             |
|----------|---------|--------|--------------------------------------------------------------------|---------|------------|---------|-------------------------------------------------------------------------------------------------------------|
| 7c00348  | 0.0005  | K00235 | succinate dehydrogenase, Fe-S protein subunit                      | um11338 | 2.21E-06   | ni      | conserved hypothetical protein                                                                              |
| 20d0079  | 0.0005  | ni     | hypothetical protein                                               | um03034 | 2.28E-06   | ni      | conserved hypothetical protein                                                                              |
| 22c00313 | 0.0053  | ni     | hydroxymethylglutaryl-coylase                                      | um11921 | 2.29E-06   | ni      | related to metallothionein                                                                                  |
| 9c00259  | 0.00053 | ni     | hypothetical protein                                               | um01976 | 2.40E-06   | ni      | putative protein                                                                                            |
| 7c00151  | 0.00053 | K00729 | glycosyltransferase                                                | um00492 | 2.42E-06   | ni      | conserved hypothetical protein                                                                              |
| 14c00116 | 0.00053 | ni     | ni                                                                 | um00122 | 2.43E-06   | ni      | conserved hypothetical protein                                                                              |
| 5c00021  | 0.00054 | ni     | hypothetical protein                                               | um00343 | 2.47E-06   | K16261  | probable GAP1 - amino acid transport protein                                                                |
| 9c00323  | 0.00058 | ni     | hypothetical protein                                               | um00578 | 2.48E-06   | ni      | putative protein                                                                                            |
| 7c00018  | 0.00054 | K04077 | mitochondrial chaperonin, Cpn60/Hsp60p                             | um12262 | 2.48E-06   | ni      | related to 4-coumarate-CoA ligase                                                                           |
| 12c01005 | 0.00055 | ni     | predicted Rho/Rac guanine nucleotide exchange factor               | um02642 | 2.49E-06   | K07078  | conserved hypothetical protein                                                                              |
| 8c00054  | 0.00055 | ni     | predicted dehydrogenase                                            | um05690 | 2.50E-06   | ni      | conserved hypothetical Ustilago-specific protein                                                            |
| 9c00095  | 0.00055 | ni     | hypothetical protein                                               | um02934 | 2.51E-06   | ni      | related to ELAV-like protein 2                                                                              |
| 19c00009 | 0.00055 | K01803 | triosphosphate isomerase                                           | um12310 | 2.64E-06   | ni      | hypothetical protein                                                                                        |
| 14c00069 | 0.00056 | ni     | hypothetical protein                                               | um01722 | 2.64E-06   | ni      | conserved hypothetical protein                                                                              |
| 10c00053 | 0.00057 | ni     | hypothetical protein                                               | um01043 | 2.66E-06   | K03120  | probable TATA-box-binding factor TBP                                                                        |
| 16c00050 | 0.00058 | K03017 | RNA polymerase II subunit 9                                        | um03114 | 2.68E-06   | ni      | conserved hypothetical protein                                                                              |
| 22c00307 | 0.00058 | ni     | hypothetical protein                                               | um01567 | 2.71E-06   | ni      | related to 2                                                                                                |
| 16c00047 | 0.00059 | K02138 | mitochondrial F1F0-ATP synthase, subunit d/ATP7                    | um01911 | 2.78E-06   | ni      | related to alcohol dehydrogenase                                                                            |
| 3c00036  | 0.00059 | ni     | predicted E3 ubiquitin ligase                                      | um06467 | 2.81E-06   | ni      | related to glucosyltransferase                                                                              |
| 5c00141  | 0.0006  | ni     | hypothetical protein                                               | um02652 | 2.88E-06   | ni      | putative protein                                                                                            |
| 9c00320  | 0.0006  | K07943 | GTP-binding ADP-ribosylation factor-like protein ARL2              | um00506 | 2.95E-06   | ni      | putative protein                                                                                            |
| 21d00003 | 0.00061 | ni     | hypothetical protein                                               | um05982 | 3.00E-06   | ni      | hypothetical protein                                                                                        |
| 10c00097 | 0.00061 | ni     | hypothetical protein                                               | um10072 | 3.10E-06   | K08139  | probable monosaccharide transporter                                                                         |
| 10c00096 | 0.00061 | ni     | hypothetical protein                                               | um15045 | 3.20E-06   | K10413  | cytoplasmic dynein heavy chain 1                                                                            |
| 12c00002 | 0.00061 | K07124 | 17 beta-hydroxysteroid dehydrogenase type 3                        | um01989 | 3.25E-06   | ni      | conserved hypothetical protein                                                                              |
| 26d00085 | 0.00061 | K10669 | chickadee conserved protein                                        | um01992 | 3.25E-06   | K00101  | probable CYB2 - lactate dehydrogenase                                                                       |
| 15c00019 | 0.00063 | K04802 | DNA polymerase delta processivity factor                           | um02197 | 3.26E-06   | ni      | conserved hypothetical protein                                                                              |
| 20d00023 | 0.00064 | ni     | hypothetical protein                                               | um11111 | 3.27E-06   | ni      | related to Ascorbate oxidase precursor                                                                      |
| 5c00038  | 0.00065 | ni     | ferric reductase                                                   | um05951 | 3.32E-06   | ni      | conserved hypothetical protein                                                                              |
| 25c00034 | 0.00065 | ni     | hypothetical protein                                               | um11166 | 3.33E-06   | ni      | conserved hypothetical protein                                                                              |
| 27d00049 | 0.00067 | K10994 | checkpoint 9-1-1 complex, RAD9 component                           | um00283 | 3.34E-06   | K00681  | related to gamma-glutamyltransferase                                                                        |
| 22d00206 | 0.00067 | ni     | 2-enoyl-CoA hydratase                                              | um00283 | 3.42E-06   | K00077  | conserved hypothetical protein                                                                              |
| 9c00053  | 0.00068 | K03509 | protein involved in establishing cohesion between sister chromatid | um04538 | 3.44E-06   | ni      | related to DAL5 - Allantoinase and ureidosuccinate permease                                                 |
| 22c00013 | 0.00068 | ni     | short-chain acyl-CoA dehydrogenase                                 | um01204 | 3.46E-06   | ni      | related to PRY1 - strong similarity to the plant PR-1 class of pathogen related proteins                    |
| 18c00017 | 0.00068 | K08736 | minichaperon MCH5                                                  | um03016 | 3.50E-06   | ni      | conserved hypothetical protein                                                                              |
| 8c00022  | 0.0007  | K16948 | septin family protein                                              | um11186 | 3.57E-06   | ni      | putative protein                                                                                            |
| 27c00055 | 0.00072 | ni     | hypothetical protein                                               | um01411 | 3.64E-06   | ni      | putative protein                                                                                            |
| 22d00032 | 0.00072 | K05355 | geranylgeranyl pyrophosphate synthase                              | um10031 | 3.68E-06   | ni      | related to embryonic protein DC-8                                                                           |
| 14c00061 | 0.00074 | ni     | glucose dehydrogenase                                              | um02753 | 3.71E-06   | ni      | conserved hypothetical protein                                                                              |
| 3c00041  | 0.00074 | ni     | hypothetical protein                                               | um01868 | 3.77E-06   | ni      | related to GIT1 - Glycerolphosphoinositol transporter also able to mediate low-affinity phosphate transport |
| 19d00094 | 0.00075 | ni     | hypothetical protein                                               | um11185 | 3.78E-06   | ni      | conserved hypothetical protein                                                                              |
| 20c00003 | 0.00075 | ni     | permease of the major facilitator superfamily                      | um04060 | 3.85E-06   | ni      | probable DIC1 - mitochondrial dicarboxylate carrier                                                         |
| 12c00112 | 0.00076 | K03021 | RNA polymerase III, second largest subunit                         | um15025 | 3.89E-06   | ni      | probable NADP-dependent alcohol dehydrogenase                                                               |
| 3c00024  | 0.00076 | K14401 | RNA cleavage and polyadenylation factor II complex, subunit C      | um04306 | 3.90E-06   | ni      | putative protein                                                                                            |
| 7c00009  | 0.00077 | ni     | acyl-coa synthetase                                                | um05966 | 3.90E-06   | ni      | conserved hypothetical protein                                                                              |
| 6c00064  | 0.00077 | ni     | flavonol reductase                                                 | um10443 | 3.95E-06   | ni      | conserved hypothetical protein                                                                              |
| 14c00067 | 0.00078 | K01408 | N-araline dibasic convertase NRD1 and related Zn2+-dependen        | um02565 | 3.95E-06   | ni      | conserved hypothetical protein                                                                              |
| 8c00082  | 0.00078 | ni     | hypothetical protein                                               | um04506 | 3.97E-06   | ni      | hypothetical protein                                                                                        |
| 11c00069 | 0.00079 | K03260 | translation initiation factor 4F, ribosome/mRNA-bridging subunit   | um12026 | 4.03E-06   | ni      | related to TMT1 - trans-acinilactate methyltransferase                                                      |
| 16c00041 | 0.00079 | ni     | hypothetical protein                                               | um00663 | 4.03E-06   | K10591  | probable Ubiquitin-protein ligase                                                                           |
| 26c00001 | 0.00079 | ni     | hypothetical protein                                               | um05705 | 4.06E-06   | ni      | putative protein                                                                                            |
| 9c00113  | 0.00079 | K07734 | hypothetical protein                                               | um02978 | 4.21E-06   | ni      | conserved hypothetical protein                                                                              |
| 27c00024 | 0.0008  | ni     | hypothetical protein                                               | um03056 | 4.22E-06   | ni      | putative protein                                                                                            |
| 7c00158  | 0.0008  | ni     | inositol polyphosphate 5-phosphatase and related proteins          | um02413 | 4.38E-06   | ni      | conserved hypothetical protein                                                                              |
| 19c00115 | 0.00081 | K08508 | SNAP-25 (synaptosome-associated protein) component of SNAR         | um05046 | 4.51E-06   | ni      | conserved hypothetical protein                                                                              |
| 22d00037 | 0.00082 | K09704 | hypothetical protein                                               | um02836 | 4.52E-06   | ni      | hypothetical protein                                                                                        |
| 22d00063 | 0.00083 | ni     | hypothetical protein                                               | um04553 | 4.61E-06   | ni      | related to growth hormone inducible transmembrane protein                                                   |
| 19d00087 | 0.00083 | K09531 | molecular chaperone                                                | um00116 | 4.64E-06   | ni      | related to nicotianamine monooxidase permease                                                               |
| 7c00100  | 0.00088 | K03008 | RNA polymerase, subunit L                                          | um00197 | 4.65E-06   | K15441  | related to TAD2 - tRNA-specific adenosine deaminase 2                                                       |
| 22c00263 | 0.00089 | K01489 | cytidine deaminase                                                 | um11596 | 4.65E-06   | ni      | related to CSR1 - phosphatidylinositol transfer protein                                                     |
| 13c00098 | 0.0009  | ni     | cation transport ATPase                                            | um11683 | 4.69E-06   | ni      | conserved hypothetical protein                                                                              |
| 10c00033 | 0.00091 | ni     | hypothetical protein                                               | um10009 | 4.69E-06   | ni      | related to acyl-CoA dehydrogenase                                                                           |
| 7c00185  | 0.00091 | ni     | acyl-coa synthetase                                                | um11187 | 4.72E-06   | ni      | related to ROT1 - molecular chaperone in the endoplasmic reticulum                                          |
| 20d00031 | 0.00092 | K01669 | deoxyribodipyrimidine photolyase                                   | um10186 | 4.83E-06   | ni      | putative protein                                                                                            |
| 26c00010 | 0.00093 | K01940 | argininosuccinate synthase                                         | um10782 | 4.87E-06   | K16803  | related to STU2 - Microtubule-associated protein                                                            |
| 27c00038 | 0.00093 | ni     | hypothetical protein                                               | um03681 | 4.87E-06   | ni      | related to Heat shock protein Hsp20                                                                         |
| 9c00003  | 0.00094 | ni     | hypothetical protein                                               | um11598 | 4.89E-06   | ni      | related to oxoreductase                                                                                     |
| 4d00041  | 0.00094 | K13335 | hypothetical protein                                               | um03063 | 4.85E-06   | K15331  | related to TRM2 - tRNA                                                                                      |
| 7c00201  | 0.00094 | ni     | hypothetical protein                                               | um12295 | 5.26E-06   | ni      | putative protein                                                                                            |
| 19d00073 | 0.00095 | ni     | hypothetical protein                                               | um11391 | 5.53E-06   | ni      | conserved hypothetical protein                                                                              |
| 22d00010 | 0.00095 | ni     | uncharacterized conserved protein                                  | um03026 | 5.61E-06   | ni      | putative protein                                                                                            |
| 3c00085  | 0.001   | K16196 | eIF-2alpha kinase GCN2                                             | um03417 | 5.73E-06   | ni      | putative acetylaminase                                                                                      |
| 9c00089  | 0.00101 | ni     | hypothetical protein                                               | um11817 | 5.91E-06   | K13124  | conserved hypothetical protein                                                                              |
| 9c00251  | 0.00102 | K01280 | tripeptidyl peptidase II                                           | um01378 | 6.38E-06   | ni      | conserved hypothetical protein                                                                              |
| 9c00022  | 0.00102 | ni     | synaptic vesicle transporter SVOP and related transporters         | um02430 | 6.42E-06   | ni      | conserved hypothetical protein                                                                              |
| 7c00174  | 0.00103 | K05727 | signaling protein DOCK180                                          | um05802 | 6.52E-06   | ni      | related to cell surface ferroxidase                                                                         |
| 9c00132  | 0.00104 | ni     | hypothetical protein                                               | um11296 | 6.54E-06   | ni      | related to calmodulin-dependent protein kinase                                                              |
| 3c00018  | 0.00107 | ni     | hypothetical protein                                               | um15048 | 6.56E-06   | ni      | related to 4-coumarate-CoA ligase 1                                                                         |
| 24c00051 | 0.00107 | ni     | component of vacuolar transporter chaperone                        | um00679 | 6.65E-06   | ni      | related to VBA1 - Vacuolar Basic Amino acid transporter                                                     |
| 15c00091 | 0.00109 | ni     | reductases with broad range of substrate specificities             | um11544 | 6.67E-06   | ni      | putative protein                                                                                            |
| 4c00017  | 0.00111 | ni     | hypothetical protein                                               | um01424 | 6.70E-06   | K10437  | probable Cytochrome P450 monooxygenase                                                                      |
| 13c00061 | 0.00112 | ni     | aldo/keto reductase family proteins                                | um11967 | 6.83E-06   | ni      | conserved hypothetical protein                                                                              |
| 3c00013  | 0.00116 | ni     | hypothetical protein                                               | um03658 | 7.01E-06   | ni      | conserved hypothetical protein                                                                              |
| 18d00041 | 0.00117 | K15192 | SNF2 family DNA-dependent ATPase domain-containing protein         | um06508 | 7.02E-06   | ni      | conserved hypothetical protein                                                                              |
| 12c00006 | 0.00118 | K10437 | cytochrome P450 CYP2 subfamily                                     | um03092 | 7.13E-06   | K1104   | related to protein tyrosine phosphatase PPS1                                                                |
| 22d00091 | 0.00121 | ni     | hypothetical protein                                               | um05676 | 7.23E-06   | ni      | related to L-aminocyclopropane-1-carboxylate synthase 1                                                     |
| 12c00005 | 0.00123 | ni     | hypothetical protein                                               | um03067 | 7.32E-06   | ni      | related to CDC33 - translation initiation factor eIF4E                                                      |
| 15d00076 | 0.00124 | ni     | hypothetical protein                                               | um05549 | 7.41E-06   | K01858  | probable myo-inositol 1-phosphate synthase                                                                  |
| 14c00035 | 0.00124 | ni     | hypothetical protein                                               | um10234 | 7.79E-06   | ni      | related to GLE1 - RNA export mediator                                                                       |
| 24d00013 | 0.00126 | K12619 | 5'-3' exonuclease HKE1/RAT1                                        | um06059 | 7.84E-06   | ni      | related to glutathione s-transferase 3                                                                      |
| 18c00065 | 0.00128 | K07407 | alpha-d-galactosidase                                              | um11795 | 7.92E-06   | K00799  | conserved hypothetical protein                                                                              |
| 9c00423  | 0.00129 | K00624 | carbamoyl-O-acyltransferase CRAT                                   | um04695 | 7.98E-06   | ni      | hypothetical protein                                                                                        |
| 22c00111 | 0.0013  | K03363 | anaphase promoting complex, Cdc20, Cdh1, and Ama1 subunits         | um05080 | 7.99E-06   | ni      | hypothetical protein                                                                                        |
| 10c00059 | 0.0013  | ni     | beta tubulin                                                       | um03281 | 8.04E-06   | ni      | putative protein                                                                                            |
| 10c00004 | 0.00131 | K07901 | GTP-binding protein SEC4                                           | um10025 | 8.14E-06   | ni      | conserved hypothetical protein                                                                              |
| 15d00014 | 0.00134 | ni     | predicted transporter                                              | um01787 | 8.27E-06   | K00547  | related to homocysteine S-methyltransferase                                                                 |
| 19d00098 | 0.00137 | ni     | hypothetical protein                                               | um05286 | 8.48E-06   | ni      | related to GS1 protein                                                                                      |
| 19d0127  | 0.00137 | K01681 | acetylcholinesterase                                               | um10118 | 8.47E-06   | ni      | conserved hypothetical Ustilago-specific protein                                                            |
| 9c00198  | 0.00138 | K00006 | sorbitol dehydrogenase                                             | um15051 | 8.55E-06   | ni      | conserved hypothetical protein                                                                              |
| 10c00103 | 0.00139 | ni     | sphingolipid fatty acid hydroxylase                                | um06406 | 8.55E-06   | K05770  | related to Peripheral-type benzodiazepine receptor                                                          |
| 13c00022 | 0.0014  | ni     | predicted membrane protein                                         | um01970 | 8.66E-06   | ni      | hypothetical protein                                                                                        |
| 5c00104  | 0.00142 | K01166 | ribonuclease                                                       | um02954 | 8.83E-06   | ni      | putative protein                                                                                            |
| 22c00286 | 0.00142 | K01230 | mannosyl-oligosaccharide alpha-1,2-mannosidase                     | um04830 | 9.03E-06   | K00036  | probable ZWF1 - glucose-6-phosphate dehydrogenase                                                           |
| 9c00135  | 0.00144 | ni     | flavin-containing monooxygenase                                    | um11285 | 9.08E-06   | ni      | conserved hypothetical protein                                                                              |
| 25d00020 | 0.00145 | ni     | hypothetical protein                                               | um00595 | 9.40E-06   | K14455  | probable aspartate aminotransferase                                                                         |
| 5c00070  | 0.00148 | K10227 | succinyl-coa, alpha-ketoacid-coa transferase                       | um04063 | 9.50E-06   | K08726  | related to soluble epoxide hydrolase                                                                        |
| 3c00051  | 0.00149 | ni     | hypothetical protein                                               | um00396 | 9.65E-06   | ni      | conserved hypothetical protein                                                                              |
| 12d00133 | 0.0015  | K07975 | ras-related small GTPase                                           | um11741 | 9.81E-06   | ni      | related to GCY1 - galactose-induced form of aldo                                                            |
| 6c00105  | 0.0015  | ni     | predicted lipase                                                   | um00945 | 9.84E-06   | K12659  | probable ARG6 - n-acetyl-gamma-glutamyl-phosphate reductase                                                 |
| 26d00033 | 0.00151 | K02908 | 60S ribosomal protein L30                                          | um02708 | 9.95E-06   | K08738  | conserved CYTOCHROME C                                                                                      |
| 9c00021  | 0.00154 | ni     | hypothetical protein                                               | um05251 | 1.01E-05   | ni      | conserved hypothetical protein                                                                              |
| 6c00022  | 0.00155 | ni     | alcohol dehydrogenase                                              | um01889 | 1.03E-05   | ni      | related to multidrug resistance protein                                                                     |
| 7c00053  | 0.00155 | K01669 | deoxyribodipyrimidine photolyase                                   | um11720 | 1.03E-05   | ni      | related to cystathionine beta-lyase                                                                         |
| 10d00096 | 0.00156 | K01187 | alpha-amylase                                                      | um03229 | 1.07E-05   | ni      | conserved hypothetical protein                                                                              |
| 6c00078  | 0.00157 | ni     | hypothetical protein                                               | um01382 | 1.07E-05   | ni      | putative protein                                                                                            |
| 20c00363 | 0.00158 | K14654 | hypothetical protein                                               | um04114 | 1.07E-05   | K101077 | probable PHO8 - repressible alkaline phosphatase vacuolar                                                   |
| 22c00243 | 0.00159 | ni     | hypothetical protein                                               | um10494 | 1.09E-05   | K01230  | related to Mannosyl-oligosaccharide 1                                                                       |
| 10d00097 | 0.00159 | K03293 | amino acid transporters                                            | um05344 | 1.09E-05   | ni      | conserved hypothetical protein                                                                              |
| 13c00054 | 0.00162 | K14152 | histidinol dehydrogenase                                           | um11516 | 1.10E-05   | ni      | conserved hypothetical protein                                                                              |
| 22d0182  | 0.00167 | ni     | glyoxylase                                                         | um03713 | 1.12E-05   | ni      | putative protein                                                                                            |
| 3c00017  | 0.00167 | ni     | COP1 vesicle protein                                               | um00455 | 1.12E-05   | ni      | related to MIR1 - Phosphate transporter of the mitochondrial carrier                                        |
| 7d00004  | 0.00167 | ni     | ferredoxin                                                         | um12267 | 1.14E-05   | ni      | related to IST2 - Plasma membrane protein that may be involved in osmotolerance                             |
| 8d00024  | 0.00168 | ni     | protein transporter                                                | um03753 | 1.14E-05   | ni      | conserved hypothetical Ustilago-specific protein                                                            |
| 14c00002 | 0.00171 | ni     | synaptic vesicle transporter SVOP and related transporters         | um06266 | 1.15E-05   | ni      | putative protein                                                                                            |
| 6c00113  | 0.00173 | K02947 | 49S ribosomal protein s10                                          | um00946 | 1.15E-05   | ni      | putative protein                                                                                            |
| 10d00044 | 0.00174 | K11362 | hypothetical protein                                               | um10912 | 1.17E-05   | ni      | conserved hypothetical protein                                                                              |
| 9c00406  | 0.00174 | ni     | hypothetical protein                                               | um02641 | 1.19E-05   | K13346  | related to PEX10 - peroxisomal assembly protein - peroxin                                                   |
| 19c00099 | 0.00176 | K00381 | sulfite reductase                                                  | um02097 | 1.20E-05   | ni      | related to enoyl-CoA hydratase                                                                              |
| 6c00106  | 0.00178 | ni     | hypothetical protein                                               | um04738 | 1.21E-05   | K01262  | related to X-Pro aminopeptidase II                                                                          |
| 9c00384  | 0.0018  | ni     | hypothetical protein                                               | um05362 | 1.21E-05   | K01641  | probable hydroxymethylglutaryl-CoA synthase                                                                 |
| 25d00006 | 0.0018  | K12879 | KEKE-like motif-containing transcription regulator                 | um05805 | 1.23E-05   | ni      | conserved hypothetical protein                                                                              |
| 13c00058 | 0.00182 | K01810 | glucose-6-phosphate isomerase                                      | um11382 | 1.26E-05   | ni      | probable 2-Nitropropane dioxygenase                                                                         |
| 9c00056  | 0.00186 | K01176 | alpha-amylase                                                      | um04000 | 1.26E-05   | ni      | DNA binding protein Ncp1                                                                                    |
| 7d00238  | 0.00189 | K12618 | 5'-3' exonuclease XRN1/KEM1/SEP1                                   | um00169 | 1.27E-05</ |         |                                                                                                             |

|          |         |        |                                                                    |           |          |        |                                                                  |
|----------|---------|--------|--------------------------------------------------------------------|-----------|----------|--------|------------------------------------------------------------------|
| 5e00136  | 0.0023  | ni     | hypothetical protein                                               | um01708   | 1.63E-05 | K00003 | probable HOM6 - homoserine dehydrogenase                         |
| 22d00196 | 0.00231 | ni     | predicted hydrolase                                                | um05346   | 1.64E-05 | ni     | conserved hypothetical protein                                   |
| 10d00003 | 0.00232 | ni     | multidrug resistance-associated protein                            | um04727   | 1.65E-05 | K17387 | related to Kinesin-like protein KIF23                            |
| 7d00188  | 0.00233 | ni     | plasma membrane H <sup>+</sup> -transporting ATPase                | um02283   | 1.66E-05 | ni     | conserved hypothetical protein                                   |
| 3d00029  | 0.00233 | K14793 | U3 snRNP-associated protein                                        | um00797   | 1.70E-05 | K00856 | probable adenosine kinase                                        |
| 3d00054  | 0.00238 | ni     | uncharacterized conserved protein                                  | um03246   | 1.70E-05 | ni     | related to versicolorin B synthase                               |
| 22c00315 | 0.00239 | ni     | permease of the major facilitator superfamily                      | um00311   | 1.70E-05 | K01953 | probable asparagine synthase                                     |
| 14d00121 | 0.00243 | ni     | uncharacterized conserved protein                                  | um02203   | 1.71E-05 | ni     | related to Ni                                                    |
| 9e00154  | 0.00245 | K15541 | predicted E3 ubiquitin ligase                                      | um011373  | 1.71E-05 | ni     | conserved hypothetical protein                                   |
| 22c00066 | 0.00246 | ni     | Ca <sup>2+</sup> /calmodulin-dependent protein kinase beta         | um11374   | 1.72E-05 | ni     | ni                                                               |
| 16d00025 | 0.00246 | ni     | hypothetical protein                                               | um11859   | 1.74E-05 | K01693 | probable HIS3 - midazolamglycerol-phosphate dehydratase          |
| 8d00073  | 0.0025  | K11275 | hypothetical protein                                               | um01665   | 1.75E-05 | ni     | hypothetical protein                                             |
| 7e00154  | 0.0025  | ni     | uncharacterized conserved protein                                  | um10052   | 1.78E-05 | ni     | conserved hypothetical protein                                   |
| 5d00045  | 0.0025  | K11644 | histone deacetylase complex, SIN3 component                        | um02035   | 1.83E-05 | ni     | related to yellowish-green 1                                     |
| 20c00041 | 0.00251 | ni     | hypothetical protein                                               | um03897   | 1.87E-05 | ni     | related to OCA1 - Putative protein tyrosine phosphatase          |
| 15c00086 | 0.00252 | ni     | pleiotropic drug resistance proteins                               | um05933   | 1.89E-05 | K14708 | probable Sulfate permease                                        |
| 7c000311 | 0.00252 | ni     | hypothetical protein                                               | um01650   | 1.90E-05 | ni     | conserved hypothetical protein                                   |
| 16d00041 | 0.00255 | ni     | hypothetical protein                                               | um01783   | 1.96E-05 | ni     | related to Inosine-uridine preferring nucleoside hydrolase       |
| 22c00222 | 0.00257 | ni     | hypothetical protein                                               | um04834   | 1.97E-05 | ni     | conserved hypothetical protein                                   |
| 26d00012 | 0.00258 | ni     | hypothetical protein                                               | um06476   | 2.03E-05 | ni     | conserved hypothetical protein                                   |
| 5c00030  | 0.0026  | ni     | NDR and related serine/threonine kinases                           | um01694   | 2.03E-05 | ni     | putative protein                                                 |
| 22d00122 | 0.00263 | K00002 | alcohol dehydrogenase                                              | um11034   | 2.12E-05 | ni     | putative protein                                                 |
| 13c00025 | 0.00264 | K04646 | vesicle coat protein clathrin                                      | um06278   | 2.15E-05 | ni     | conserved hypothetical protein                                   |
| 22d00065 | 0.00265 | ni     | hypothetical protein                                               | um05961   | 2.18E-05 | K01796 | probable alpha-methylacyl-coa racemase                           |
| 9d00171  | 0.00266 | K11514 | hypothetical protein                                               | um00547   | 2.20E-05 | K00286 | probable PRC3 - delta 1-pyrroline-5-carboxylate reductase        |
| 14d00110 | 0.00267 | K00819 | crinialine aminotransferase                                        | um01613   | 2.22E-05 | ni     | putative protein                                                 |
| 9e00130  | 0.00267 | ni     | hypothetical protein                                               | um12330   | 2.25E-05 | ni     | hypothetical protein                                             |
| 22c00196 | 0.00267 | K14265 | aromatic amino acid aminotransferase and related proteins          | um05718   | 2.26E-05 | ni     | related to KRE6 - Beta-glucan synthase subunit                   |
| 22d00212 | 0.00268 | ni     | hypothetical protein                                               | um00486   | 2.26E-05 | K01835 | probable PGM2 - phosphoglucomutase                               |
| 20c00052 | 0.00271 | ni     | hypothetical protein                                               | um11022   | 2.27E-05 | ni     | related to SR Y1 - 3-hydroxyaspartate dehydratase                |
| 22c00164 | 0.00273 | ni     | hypothetical protein                                               | um05476   | 2.28E-05 | K01897 | related to Long-chain-fatty-acyl-CoA ligase 6                    |
| 12c00139 | 0.00277 | ni     | hypothetical protein                                               | um02942   | 2.32E-05 | K00390 | probable MET16 - 3                                               |
| 16c00017 | 0.00279 | K09554 | cell division cycle 37 protein                                     | um01626   | 2.33E-05 | ni     | conserved hypothetical protein                                   |
| 27c00036 | 0.0028  | K00759 | adenine phosphoribosyl transferases                                | um01771   | 2.34E-05 | K06929 | conserved hypothetical protein                                   |
| 27c00088 | 0.00282 | ni     | hypothetical protein                                               | um05459   | 2.34E-05 | K01610 | probable phosphoenolpyruvate carboxykinase                       |
| 9e00036  | 0.00283 | ni     | D-arabino-1, 4-lactone oxidase                                     | um10413   | 2.36E-05 | ni     | hypothetical protein                                             |
| 16d00038 | 0.00284 | ni     | hypothetical protein                                               | um04794   | 2.37E-05 | K03124 | probable SUA7 - TFIIIB subunit                                   |
| 12d00082 | 0.00285 | K13501 | phosphoribosylanthranilate isomerase                               | um00750   | 2.38E-05 | ni     | putative protein                                                 |
| 19c00072 | 0.00287 | ni     | hypothetical protein                                               | um00727   | 2.40E-05 | ni     | putative protein                                                 |
| 7c000293 | 0.00287 | ni     | hypothetical protein                                               | um02810   | 2.42E-05 | ni     | conserved hypothetical protein                                   |
| 7d00132  | 0.00291 | ni     | hypothetical protein                                               | um03924   | 2.44E-05 | ni     | repellent protein 1 precursor                                    |
| 13d00006 | 0.00292 | ni     | hypothetical protein                                               | um04014   | 2.47E-05 | ni     | putative protein                                                 |
| 18d00013 | 0.00297 | K03010 | RNA polymerase II, second largest subunit                          | um10664   | 2.51E-05 | ni     | conserved hypothetical protein                                   |
| 3c00039  | 0.00298 | ni     | hypothetical protein                                               | um04333   | 2.58E-05 | ni     | putative protein                                                 |
| 11c00088 | 0.00301 | ni     | acyl-coa synthetase                                                | um15014   | 2.61E-05 | ni     | related to KAP123 - Importin beta-4 subunit                      |
| 5c00150  | 0.00302 | K05841 | UDP-glucuronosyl and UDP-glucosyl transferase                      | um00169   | 2.62E-05 | K00143 | probable LYS2 - L-aminoacidate-semialdehyde dehydrogenase        |
| 25c00019 | 0.00306 | ni     | hypothetical protein                                               | um03860   | 2.62E-05 | ni     | related to pepsinogen precursor                                  |
| 9c00427  | 0.00306 | K00856 | possible pfkfb family carbohydrate kinase                          | um11266   | 2.65E-05 | K13333 | probable hypophosphatase                                         |
| 2d00063  | 0.00308 | K03506 | CCAAT-binding factor, subunit C                                    | um06454   | 2.66E-05 | ni     | related to Mannose-6-phosphate isomerase                         |
| 7d00095  | 0.0031  | ni     | uncharacterized conserved protein                                  | um10801   | 2.68E-05 | ni     | conserved hypothetical protein                                   |
| 3c00012  | 0.00312 | ni     | hypothetical protein                                               | um01425   | 2.69E-05 | K00451 | probable homogentisate 1                                         |
| 16d00022 | 0.00312 | ni     | hypothetical protein                                               | um11345   | 2.72E-05 | ni     | ni                                                               |
| 27c00085 | 0.00314 | ni     | AAA-type ATPase containing the bromodomain                         | um11170   | 2.72E-05 | K03942 | probable NADH2 dehydrogenase                                     |
| 5d00091  | 0.00317 | ni     | hypothetical protein                                               | um01917   | 2.73E-05 | ni     | hypothetical protein                                             |
| 7c00316  | 0.00322 | ni     | hypothetical protein                                               | um05944   | 2.74E-05 | ni     | hypothetical protein                                             |
| 22c00080 | 0.00324 | ni     | predicted membrane protein                                         | um00545   | 2.77E-05 | ni     | conserved hypothetical protein                                   |
| 27c00054 | 0.00325 | K10415 | cytoplasmic dynein intermediate chain                              | um05249   | 2.83E-05 | ni     | conserved hypothetical protein                                   |
| 9c00346  | 0.00326 | ni     | hypothetical protein                                               | um02108   | 2.85E-05 | ni     | conserved hypothetical protein                                   |
| 4d00001  | 0.00327 | ni     | diphthamide biosynthesis protein                                   | um03199   | 2.90E-05 | K00820 | probable GFA1 - glucosamine-fructose-6-phosphate transaminase    |
| 25c00014 | 0.00329 | ni     | hypothetical protein                                               | um04322   | 2.91E-05 | ni     | conserved hypothetical protein                                   |
| 24d00051 | 0.00329 | ni     | hypothetical protein                                               | um11798   | 2.94E-05 | ni     | conserved hypothetical protein                                   |
| 16c00045 | 0.00331 | K08504 | hypothetical protein                                               | um00391   | 2.99E-05 | ni     | ni                                                               |
| 7e00136  | 0.00334 | ni     | glia maturation factor beta                                        | um04154   | 3.06E-05 | ni     | conserved hypothetical protein                                   |
| 7e00140  | 0.00335 | ni     | hypothetical protein                                               | um10721   | 3.13E-05 | ni     | putative protein                                                 |
| 5e00020  | 0.00337 | ni     | aldehyde dehydrogenase                                             | um11065   | 3.14E-05 | ni     | conserved hypothetical protein                                   |
| 6c00091  | 0.00338 | ni     | hypothetical protein                                               | um10705   | 3.14E-05 | K04563 | cyclin-dependent kinase 1                                        |
| 24c00009 | 0.00338 | ni     | hypothetical protein                                               | um12336.2 | 3.15E-05 | K08740 | related to meiosis-specific Mus81 homolog                        |
| 6c00043  | 0.0034  | ni     | hypothetical protein                                               | um02935.2 | 3.15E-05 | K11270 | hypothetical protein                                             |
| 7d00119  | 0.00341 | K03109 | hypothetical protein                                               | um05183   | 3.19E-05 | K03122 | related to TOA1 - transcription factor TFIIA-L                   |
| 22d00184 | 0.00351 | ni     | acyl-coa transporter                                               | um01800   | 3.25E-05 | K03635 | related to myoblobin synthase large subunit                      |
| 8c00067  | 0.00351 | K02995 | 40S ribosomal protein S8                                           | um05114   | 3.27E-05 | ni     | related to multidrug resistance protein 4                        |
| 9e00046  | 0.00359 | ni     | inorganic phosphate transporter                                    | um00672   | 3.30E-05 | K00365 | probable urate oxidase                                           |
| 5e00131  | 0.00362 | ni     | hypothetical protein                                               | um01431   | 3.32E-05 | ni     | ni                                                               |
| 9e00140  | 0.00363 | K11233 | senory transduction histidine kinase                               | um00636   | 3.35E-05 | ni     | hypothetical protein                                             |
| 11d00022 | 0.00364 | K01531 | Ca <sup>2+</sup> -transporting ATPase                              | um02835   | 3.37E-05 | K00448 | conserved hypothetical protein                                   |
| 8d00072  | 0.00366 | ni     | predicted ATPase                                                   | um00748   | 3.37E-05 | K12832 | probable Soling factor 3B subunit 5                              |
| 9d00357  | 0.00368 | K06698 | proteasome activator subunit                                       | um10263   | 3.45E-05 | ni     | related to 1-phosphatidylinositol-4                              |
| 9d00013  | 0.00372 | ni     | hypothetical protein                                               | um01640   | 3.53E-05 | ni     | related to GAS1 - glycospholipid-anchored surface glycoprotein   |
| 5d00118  | 0.00373 | ni     | zinc-binding oxidoreductase                                        | um04671   | 3.54E-05 | ni     | conserved hypothetical protein                                   |
| 25c00005 | 0.00375 | ni     | hypothetical protein                                               | um11121   | 3.64E-05 | ni     | related to phenylacetyl-CoA ligase                               |
| 8c00051  | 0.00376 | ni     | hypothetical protein                                               | um01933   | 3.67E-05 | ni     | putative protein                                                 |
| 10d00102 | 0.00377 | K01001 | glycosyltransferase                                                | um01136   | 3.67E-05 | ni     | conserved hypothetical protein                                   |
| 8d00021  | 0.00379 | K01193 | beta-fructofuranosidase                                            | um01070   | 3.68E-05 | ni     | related to cyclopropane-fatty-acyl-phospholipid synthase         |
| 12d00097 | 0.0038  | K01410 | metalloendopeptidase family - mitochondrial intermediate peptidase | um10104   | 3.72E-05 | ni     | probable GCY1 - galactose-induced protein of aldo                |
| 9d00007  | 0.00385 | K16330 | predicted carbohydrate kinase                                      | um01181   | 3.73E-05 | ni     | conserved hypothetical protein                                   |
| 12c00021 | 0.00387 | ni     | hypothetical protein                                               | um12011   | 3.75E-05 | ni     | putative protein                                                 |
| 16c00080 | 0.00389 | ni     | hypothetical protein                                               | um02119   | 3.78E-05 | ni     | hypothetical protein                                             |
| 22c00292 | 0.00394 | ni     | predicted transporter                                              | um11133   | 3.81E-05 | ni     | conserved hypothetical protein                                   |
| 14d00339 | 0.00395 | K16572 | hypothetical protein                                               | um02592   | 3.85E-05 | ni     | conserved hypothetical protein                                   |
| 13d00046 | 0.00394 | K09497 | chaperonin complex component, TCP-1 epsilon subunit                | um11251   | 3.83E-05 | ni     | putative protein                                                 |
| 16d00064 | 0.00395 | ni     | hypothetical protein                                               | um12169   | 3.90E-05 | K03317 | related to Sodium                                                |
| 7e00355  | 0.00402 | ni     | hypothetical protein                                               | um10165   | 3.94E-05 | ni     | hypothetical protein                                             |
| 7e00220  | 0.00408 | ni     | uncharacterized conserved protein                                  | um00011   | 4.00E-05 | K01426 | probable AMD2 - amidase                                          |
| 25d00049 | 0.00411 | K15040 | potassium-dependent anion-selective channel protein                | um03356   | 4.02E-05 | K01689 | probable ENO1 - enolase I                                        |
| 6c00032  | 0.00414 | ni     | acyl-coa synthetase                                                | um02791   | 4.09E-05 | ni     | related to GABA permease                                         |
| 9c00227  | 0.00415 | ni     | hypothetical protein                                               | um03289   | 4.10E-05 | ni     | hypothetical protein                                             |
| 8c00059  | 0.00417 | K00276 | copper amine oxidase                                               | um06440   | 4.11E-05 | ni     | conserved hypothetical protein                                   |
| 14d00082 | 0.00418 | K12627 | small Nuclear ribonucleoprotein splicing factor                    | um001292  | 4.12E-05 | ni     | putative protein                                                 |
| 25d00058 | 0.00419 | K00550 | phospholipid methyltransferase                                     | um04787   | 4.18E-05 | K01620 | related to GLY1 - L-threonine aldolase                           |
| 11d00063 | 0.00419 | ni     | protein required for meiotic chromosome segregation                | um02256   | 4.22E-05 | ni     | related to Cingulin                                              |
| 13c00084 | 0.00421 | ni     | hypothetical protein                                               | um00913   | 4.26E-05 | ni     | glyoxaloxidase 2                                                 |
| 3c00011  | 0.00423 | ni     | choline kinase                                                     | um12198   | 4.42E-05 | ni     | conserved hypothetical protein                                   |
| 8c00122  | 0.0043  | ni     | hypothetical protein                                               | um10349   | 4.43E-05 | ni     | related to molybdenum cofactor sulfurase                         |
| 2d00004  | 0.0043  | ni     | hypothetical protein                                               | um10390   | 4.47E-05 | ni     | conserved hypothetical protein                                   |
| 14d00049 | 0.00431 | ni     | predicted esterase                                                 | um11346   | 4.50E-05 | ni     | conserved hypothetical protein                                   |
| 27d00040 | 0.00436 | ni     | hypothetical protein                                               | um11337.2 | 4.56E-05 | K01555 | related to lumenaryalcooalcatate hydrolase                       |
| 26d00006 | 0.00439 | K14572 | AAA ATPase containing von Willebrand factor type A                 | um05347   | 4.56E-05 | ni     | conserved hypothetical protein                                   |
| 9c00224  | 0.00439 | ni     | hypothetical protein                                               | um00463   | 4.58E-05 | K12597 | conserved hypothetical protein                                   |
| 7d00234  | 0.0044  | K09291 | uncharacterized conserved colled-coil protein                      | um00783   | 4.58E-05 | ni     | related to Heme oxygenase                                        |
| 7c00285  | 0.00443 | ni     | predicted membrane protein                                         | um00271   | 4.59E-05 | ni     | related to Lipase                                                |
| 3c00077  | 0.00444 | ni     | hypothetical protein                                               | um00623   | 4.61E-05 | ni     | conserved hypothetical protein                                   |
| 7c00029  | 0.0045  | ni     | hypothetical protein                                               | um03296   | 4.79E-05 | ni     | hypothetical protein                                             |
| 22c00009 | 0.00456 | ni     | uncharacterized conserved membrane protein                         | um11258   | 4.79E-05 | K09250 | related to GIS2 - Putative zinc finger protein                   |
| 16c00072 | 0.00458 | ni     | soluble epoxide hydrolase                                          | um04578   | 4.82E-05 | ni     | conserved hypothetical protein                                   |
| 20c0039  | 0.00459 | K01952 | phosphoribosylformylglycinamide synthase                           | um00117   | 4.82E-05 | ni     | related to amidase                                               |
| 8c00070  | 0.0046  | ni     | hypothetical protein                                               | um00177   | 4.87E-05 | ni     | conserved hypothetical protein                                   |
| 19d00087 | 0.00463 | K11315 | histone acetyltransferases PCAF/SAGA/ADA, subunit TADA3L7          | um04056   | 4.87E-05 | ni     | probable SNQ2 - ABC transporter involved in multidrug resistance |
| 24d00022 | 0.00463 | ni     | chitinase                                                          | um00754   | 4.90E-05 | ni     | putative protein                                                 |
| 15c00056 | 0.00464 | ni     | hypothetical protein                                               | um00315   | 4.90E-05 | K01012 | probable biotin synthase                                         |
| 19c00029 | 0.00469 | ni     | hypothetical protein                                               | um10876   | 5.02E-05 | ni     | conserved hypothetical protein                                   |
| 7d00175  | 0.0047  | ni     | hypothetical protein                                               | um10473   | 5.13E-05 | ni     | conserved hypothetical protein                                   |
| 5d00022  | 0.00471 | ni     | protein kinase PCTAIRE and related kinases                         | um04109   | 5.14E-05 | ni     | related to Cytochrome P450                                       |
| 12c00076 | 0.00473 | K06268 | Ca <sup>2+</sup> /calmodulin-dependent protein phosphatase         | um04876   | 5.24E-05 | ni     | hypothetical protein                                             |
| 14c00106 | 0.00474 | ni     | hypothetical protein                                               | um02157   | 5.32E-05 | K00309 | conserved hypothetical protein                                   |
| 22d0166  | 0.00475 | ni     | predicted mitochondrial carrier protein                            | um10493   | 5.40E-05 | ni     | conserved hypothetical protein                                   |
| 27d00060 | 0.00475 | K12274 | molecular co-chaperone ST11                                        | um10945   | 5.41E-05 | ni     | conserved hypothetical protein                                   |
| 7d00129  | 0.00476 | K16055 | trehalose 6-phosphate synthase component TPS1 and related su       | um11207   | 5.42E-05 | K03783 | related to PNP1 - purine-nucleoside phosphorylase                |
| 24c00053 | 0.00479 | K09494 | chaperonin complex component, TCP-1 beta subunit                   | um00866   | 5.43E-05 | ni     | related to Endoglycanase                                         |
| 26d00030 | 0.00482 | ni     | FOG, RRM domain                                                    | um11271   | 5.56E-05 | K13525 | probable CDC48 - Microsomal protein of CDC48                     |
| 9c00362  | 0.00485 | K01179 | hypothetical protein                                               | um02160   | 5.72E-05 | ni     | conserved hypothetical protein                                   |
| 7d00200  | 0.00488 | K03538 | RNase MRP and P <sub>2</sub> subunit POP4/p29                      | um11031   | 5.86E-05 | ni     | conserved hypothetical protein                                   |
| 9c00333  | 0.00489 | ni     | predicted E3 ubiquitin ligase                                      | um15063   | 5.87E-05 | ni     | conserved hypothetical protein                                   |
| 9e00115  | 0.00491 | ni     | hypothetical protein                                               | um01922   | 5.87E-05 | K00459 | conserved hypothetical protein                                   |
| 24d00334 | 0.00492 | ni     | hypothetical protein                                               | um01626   | 5.91E-05 | ni     | putative protein                                                 |
| 22d00225 | 0.00495 | ni     | hypothetical protein                                               | um11896   | 5.93E-05 | K00396 | probable NADH-ubiquinone oxidoreductase 30                       |
| 9d00104  | 0.00496 | ni     | hypothetical protein                                               | um04705</ |          |        |                                                                  |

|          |         |        |                                                                 |           |          |        |                                                                                            |
|----------|---------|--------|-----------------------------------------------------------------|-----------|----------|--------|--------------------------------------------------------------------------------------------|
| 7c00091  | 0.00542 | ni     | RNA-binding protein SART3                                       | um06404   | 7.58E-05 | K03386 | probable thioredoxin peroxidase                                                            |
| 15d00007 | 0.00543 | ni     | hypothetical protein                                            | um02640   | 7.59E-05 | ni     | conserved hypothetical protein                                                             |
| 3d00047  | 0.00545 | K00615 | thymidylate synthase                                            | um03854   | 7.63E-05 | K00161 | probable PDA1 - pyruvate dehydrogenase                                                     |
| 10d00004 | 0.00548 | ni     | aspartyl protease                                               | um06048   | 7.64E-05 | K07170 | conserved hypothetical protein                                                             |
| 28c00034 | 0.00548 | ni     | hypothetical protein                                            | um05230   | 7.70E-05 | K00480 | probable Salicylate hydroxylase                                                            |
| 19c00127 | 0.0056  | ni     | hypothetical protein                                            | um01850   | 7.70E-05 | ni     | conserved hypothetical protein                                                             |
| 5d00054  | 0.00562 | ni     | hypothetical protein                                            | um10342   | 7.75E-05 | ni     | putative protein                                                                           |
| 5d00092  | 0.00564 | K02999 | RNA polymerase I, large subunit                                 | um01892   | 7.79E-05 | ni     | putative protein                                                                           |
| 10c00046 | 0.00567 | ni     | very-long-chain acyl-CoA dehydrogenase                          | um05082   | 7.85E-05 | ni     | conserved hypothetical protein                                                             |
| 9d00020  | 0.00569 | K10364 | F-actin capping protein, alpha subunit                          | um00188   | 7.87E-05 | ni     | conserved hypothetical protein                                                             |
| 27c00043 | 0.00572 | ni     | urea transporter                                                | um02072   | 7.92E-05 | ni     | conserved hypothetical protein                                                             |
| 12c00115 | 0.00577 | K01756 | adenylosuccinate lyase                                          | um11596   | 8.03E-05 | ni     | putative protein                                                                           |
| 22d00075 | 0.00582 | ni     | hypothetical protein                                            | um01574   | 8.17E-05 | ni     | conserved hypothetical protein                                                             |
| 19c00098 | 0.00588 | K02873 | 60S Ribosomal protein L13                                       | um10080   | 8.25E-05 | ni     | probable theta class glutathione S-transferase                                             |
| 5d00015  | 0.00594 | ni     | hypothetical protein                                            | um00138   | 8.26E-05 | K02358 | probable TUF1 - translation elongation factor TU                                           |
| 16c00019 | 0.006   | ni     | hypothetical protein                                            | um01450   | 8.27E-05 | ni     | related to COD2 - para-hydroxybenzoate-poly(prenyl)transferase                             |
| 15d00025 | 0.00602 | ni     | hypothetical protein                                            | um11009   | 8.32E-05 | ni     | probable RSR1 - GTP-binding protein                                                        |
| 12c00059 | 0.00609 | ni     | vacuolar assembly/sorting protein VPS41                         | um01163   | 8.39E-05 | ni     | conserved hypothetical protein                                                             |
| 9d00141  | 0.00617 | K01907 | acyl-coa synthetase                                             | um00045   | 8.41E-05 | K00344 | related to quinone reductase                                                               |
| 13d00004 | 0.00619 | ni     | hypothetical protein                                            | um00222.2 | 8.41E-05 | ni     | related to monocarboxylate transporter                                                     |
| 28c00015 | 0.0062  | K13025 | predicted ATP-dependent RNA helicase FAL1                       | um10905   | 8.57E-05 | ni     | conserved hypothetical protein                                                             |
| 19c00088 | 0.0062  | K00390 | phosphodensine phosphosulfate reductase                         | um02415   | 8.61E-05 | K10753 | related to aryl-silencing protein 1                                                        |
| 16d00029 | 0.00625 | ni     | reductases with broad range of substrate specificities          | um05593   | 8.88E-05 | ni     | hypothetical protein                                                                       |
| 4c00029  | 0.00629 | K03252 | hypothetical protein                                            | um00388   | 9.20E-05 | K01551 | probable arsenite translocating ATPase                                                     |
| 22c00310 | 0.0063  | ni     | hypothetical protein                                            | um02001   | 9.30E-05 | K01640 | related to hydroxymethylglutaryl-CoA lyase                                                 |
| 22d01010 | 0.00631 | K15118 | predicted mitochondrial carrier protein                         | um03692   | 9.38E-05 | ni     | conserved hypothetical protein                                                             |
| 9d00041  | 0.00633 | K02838 | ribosome recycling factor                                       | um02819   | 9.51E-05 | ni     | conserved hypothetical protein                                                             |
| 11d00039 | 0.00642 | K11648 | integral membrane protein                                       | um02273   | 9.58E-05 | ni     | putative protein                                                                           |
| 9c00087  | 0.00644 | K02358 | mitochondrial translation elongation factor Tu                  | um00859   | 9.60E-05 | ni     | conserved hypothetical protein                                                             |
| 11c00061 | 0.00644 | K09272 | nucleosome-binding factor SPN, POB3 subunit                     | um01379   | 9.80E-05 | K09647 | related to IMP1 - protease                                                                 |
| 7d00073  | 0.00648 | K08296 | serine/threonine protein kinase                                 | um05729   | 9.80E-05 | ni     | conserved hypothetical protein                                                             |
| 18c00060 | 0.00648 | K10424 | hypothetical protein                                            | um10414   | 9.94E-05 | ni     | conserved hypothetical protein                                                             |
| 9c00322  | 0.0065  | K04508 | beta-transducin family protein                                  | um05116.2 | 0.0001   | K02357 | conserved hypothetical protein                                                             |
| 7c00188  | 0.00654 | ni     | signal recognition particle, subunit Srp68                      | um11055   | 0.0001   | ni     | conserved hypothetical protein                                                             |
| 6d00017  | 0.00658 | ni     | FGC, Predicted E3 ubiquitin ligase                              | um04183   | 0.0001   | K12846 | conserved hypothetical protein                                                             |
| 3c00001  | 0.00659 | ni     | hypothetical protein                                            | um01724   | 0.0001   | ni     | conserved hypothetical protein                                                             |
| 9c00176  | 0.00662 | ni     | hypothetical protein                                            | um05202   | 0.0001   | ni     | conserved hypothetical protein                                                             |
| 22c00015 | 0.00671 | K03237 | translation initiation factor 2, alpha subunit                  | um01627   | 0.0001   | K01647 | probable CIT1 - citrate                                                                    |
| 5d00137  | 0.00674 | K13342 | TPR repeat-containing protein                                   | um03220   | 0.0001   | K01743 | conserved hypothetical protein                                                             |
| 9d00316  | 0.00674 | ni     | hypothetical protein                                            | um02548   | 0.0001   | ni     | related to Sorting nexin 5                                                                 |
| 13d00091 | 0.00677 | K02180 | mitotic spindle checkpoint protein BUB3                         | um01936   | 0.0001   | ni     | related to 4-coumarate-CoA ligase                                                          |
| 20c00029 | 0.00693 | K03258 | FGC, RRM domain                                                 | um02741   | 0.0001   | ni     | related to CBK1 - Serine                                                                   |
| 13d00073 | 0.007   | ni     | exosomal 3'-5' exonucleolase complex, subunit Rrp44/Dis3        | um10219   | 0.0001   | ni     | related to 3-dehydrocrotonate dehydratase                                                  |
| 3d00043  | 0.00703 | K02950 | mitochondrial ribosomal protein S12                             | um10748.2 | 0.0001   | K01253 | conserved hypothetical protein                                                             |
| 16c00076 | 0.00702 | K17069 | cystathionine beta-lyase                                        | um10699   | 0.0001   | ni     | probable SRP1 - Imporin alpha                                                              |
| 18d00087 | 0.00703 | K14794 | uncharacterized conserved protein                               | um01429   | 0.0001   | ni     | related to high-affinity nickel transport protein nic1                                     |
| 7c00142  | 0.00704 | ni     | zinc-binding oxidoreductase                                     | um05936   | 0.0001   | ni     | conserved hypothetical protein                                                             |
| 2d00042  | 0.00711 | ni     | nonsense-mediated mRNA decay protein                            | um03942   | 0.0001   | ni     | conserved hypothetical protein                                                             |
| 6c00109  | 0.00712 | ni     | hypothetical protein                                            | um02117   | 0.0001   | ni     | putative protein                                                                           |
| 7c00361  | 0.00718 | ni     | 3-Methylcrotonyl-CoA carboxylase, non-biotin containing subunit | um03290   | 0.0001   | K04482 | DNA repair protein RADS1                                                                   |
| 2d00007  | 0.00718 | ni     | hypothetical protein                                            | um03761   | 0.0001   | ni     | related to aldehyde dehydrogenase                                                          |
| 19d00110 | 0.00719 | K05543 | RNA-dihydrouridine synthase                                     | um06138   | 0.0001   | K03305 | probable PTR2 - Di- and tripeptide permease                                                |
| 25d00062 | 0.00712 | ni     | hypothetical protein                                            | um02412   | 0.0001   | ni     | hypothetical protein                                                                       |
| 28c00035 | 0.00724 | ni     | chromatin remodeling complex WSTF-ISWI, large subunit           | um10973   | 0.0001   | K00121 | probable glutathione-dependent formaldehyde dehydrogenase                                  |
| 5c00028  | 0.00728 | K03165 | DNA topoisomerase III alpha                                     | um02063   | 0.0001   | ni     | conserved hypothetical protein                                                             |
| 9c00003  | 0.00731 | ni     | hypothetical protein                                            | um02915   | 0.0001   | K00833 | related to Adenosylmethionine-8-amino-7-oxononanoate aminotransferase                      |
| 16c00093 | 0.00739 | ni     | C-3 sterol dehydrogenase                                        | um11519   | 0.0001   | K02913 | probable Sds ribosomal protein L33                                                         |
| 5d00052  | 0.00739 | ni     | hypothetical protein                                            | um05324   | 0.0001   | ni     | related to ZNF1 - methyltransferase involved in zinc-responsive transcriptional regulation |
| 13c00067 | 0.00744 | K00236 | succinate dehydrogenase, cytochrome b subunit                   | um05632   | 0.0001   | ni     | probable ISU1 - Iron-Sulfur cluster niU-like protein                                       |
| 18d00043 | 0.00752 | ni     | hypothetical protein                                            | um02967   | 0.0001   | K00940 | probable YNK1 - nucleoside diphosphate kinase                                              |
| 9c00048  | 0.00754 | K02155 | vacuolar H <sup>+</sup> -ATPase V0 sector, subunits c/c'        | um06378   | 0.0001   | ni     | putative protein                                                                           |
| 2d000716 | 0.00755 | ni     | hypothetical protein                                            | um01951   | 0.0001   | ni     | putative protein                                                                           |
| 19d00041 | 0.00757 | K03139 | transcription initiation factor IIF, small subunit              | um01224   | 0.0001   | ni     | MADS-box homolog Umc1                                                                      |
| 27d00020 | 0.00758 | ni     | mitochondrial solute carrier protein                            | um11574   | 0.0001   | K01607 | related to Carboxymuconolactone decarboxylase                                              |
| 27d00062 | 0.0076  | K15174 | putative RNA polymerase II regulator                            | um00411.2 | 0.0001   | ni     | related to metalloproteinase                                                               |
| 24c00052 | 0.0076  | ni     | transcription factor of the Forkhead/HNF3 family                | um10067   | 0.0001   | ni     | hypothetical protein                                                                       |
| 7d00316  | 0.00767 | ni     | hypothetical protein                                            | um04744   | 0.0001   | K01771 | related to 1-phosphatidylinositol phosphodiesterase precursor                              |
| 9d00238  | 0.00768 | K15196 | transcription initiation factor TFIIB, Brf1 subunit             | um11595.2 | 0.0001   | ni     | conserved hypothetical protein                                                             |
| 20c00230 | 0.0077  | ni     | galactokinase                                                   | um00412   | 0.0001   | K00008 | related to sorbitol dehydrogenase                                                          |
| 20c00080 | 0.00773 | ni     | predicted membrane protein                                      | um06427   | 0.0001   | ni     | related to Kinesin-like protein KIF2C                                                      |
| 13d00031 | 0.00775 | ni     | hypothetical protein                                            | um03242   | 0.0001   | ni     | related to SSZ1 - regulatory protein involved in pleiotropic drug resistance               |
| 10d00011 | 0.0078  | K00264 | glutamate synthase                                              | um03749   | 0.0001   | ni     | conserved hypothetical Ustilago-specific protein                                           |
| 16d00061 | 0.00787 | K10592 | E3 ubiquitin-protein ligase                                     | um01414   | 0.0001   | ni     | related to Ras-GTPase-activating protein binding protein 2                                 |
| 19d00024 | 0.0079  | K05605 | enoyl-coa hydratase                                             | um02709   | 0.0001   | K11253 | probable HHT1 - histone H3                                                                 |
| 6d00002  | 0.00791 | K00480 | hypothetical protein                                            | um10452   | 0.0001   | K03441 | related to channel protein                                                                 |
| 9d00021  | 0.00793 | K01610 | hypothetical protein                                            | um00749   | 0.0001   | ni     | related to lipase                                                                          |
| 9d00077  | 0.00803 | ni     | hypothetical protein                                            | um15043.2 | 0.0001   | ni     | probable ENA2 - Plasma membrane P-type ATPase                                              |
| 9c00372  | 0.00804 | K14792 | rRNA processing protein Rps5                                    | um12111   | 0.0001   | ni     | related to small nuclear ribonucleoprotein snRNP U1A                                       |
| 5c00131  | 0.00827 | ni     | hypothetical protein                                            | um00655   | 0.0001   | K00006 | probable glycerol-3-phosphate dehydrogenase                                                |
| 5c00133  | 0.00829 | ni     | hypothetical protein                                            | um05058   | 0.0001   | ni     | conserved hypothetical protein                                                             |
| 10c0016  | 0.0083  | ni     | enoyl-coa hydratase                                             | um03817   | 0.0001   | ni     | putative protein                                                                           |
| 24c00047 | 0.00835 | K03243 | translation initiation factor 5B                                | um03068   | 0.0001   | K00344 | related to NADPH2                                                                          |
| 13d00043 | 0.00845 | ni     | hypothetical protein                                            | um04805   | 0.0001   | ni     | hypothetical protein                                                                       |
| 6d00089  | 0.00846 | K15634 | phosphoglycerate mutase                                         | um11215   | 0.0001   | K02178 | related to spindle assembly checkpoint protein                                             |
| 19c00098 | 0.00848 | ni     | ATP-dependent RNA helicase A                                    | um03715   | 0.0001   | ni     | conserved hypothetical protein                                                             |
| 20d00065 | 0.00856 | K02893 | 60s ribosomal protein L23                                       | um04612   | 0.0001   | K00297 | probable MET13 - putative methylene tetrahydrofolate reductase                             |
| 7d00053  | 0.00856 | ni     | hypothetical protein                                            | um04216   | 0.0001   | K14416 | related to translation elongation factor HBS1 protein                                      |
| 18c00011 | 0.00858 | ni     | flavonol reductase                                              | um11013   | 0.0001   | ni     | putative protein                                                                           |
| 9d00066  | 0.00859 | ni     | predicted helicase                                              | um03248   | 0.0001   | ni     | related to YnfK8 - putative mediator of drug efflux                                        |
| 19d00022 | 0.0086  | ni     | hypothetical protein                                            | um02150   | 0.0001   | K00008 | probable xylitol dehydrogenase                                                             |
| 12d00086 | 0.00862 | ni     | predicted transporter                                           | um02411   | 0.0001   | ni     | glyoxalase 1                                                                               |
| 5d00078  | 0.00878 | ni     | hypothetical protein                                            | um02921   | 0.0001   | ni     | conserved hypothetical protein                                                             |
| 9d00351  | 0.00881 | K04536 | G-protein beta subunit                                          | um01421   | 0.0001   | ni     | related to PHO80 - cyclin                                                                  |
| 13d00003 | 0.00881 | K12189 | uncharacterized conserved protein                               | um12271   | 0.0001   | K00509 | putative diacylglycerol 5-phosphatase                                                      |
| 22c00149 | 0.00884 | K00793 | riboflavin synthase alpha chain                                 | um05390   | 0.0001   | K13350 | related to peroxisomal membrane protein 4                                                  |
| 7d00237  | 0.00887 | K06890 | N-methyl-D-aspartate receptor glutamate-binding subunit         | um05132   | 0.0001   | K07300 | related to VCX1 - Vacuolar Ca                                                              |
| 24d00006 | 0.00889 | K03078 | RNA polymerase III, large subunit                               | um05686   | 0.0001   | ni     | putative protein                                                                           |
| 8c00016  | 0.00893 | ni     | hypothetical protein                                            | um11203   | 0.0001   | ni     | conserved hypothetical protein                                                             |
| 9c00217  | 0.00907 | K01906 | acyl-coa synthetase                                             | um10631   | 0.0001   | ni     | conserved hypothetical Ustilago-specific protein                                           |
| 22c00139 | 0.00912 | ni     | hypothetical protein                                            | um00897   | 0.0001   | ni     | conserved hypothetical protein                                                             |
| 7d00082  | 0.00912 | ni     | Na <sup>+</sup> /H <sup>+</sup> antiporter                      | um03204   | 0.0001   | K00698 | chitin synthase 8                                                                          |
| 9c00092  | 0.0092  | ni     | hypothetical protein                                            | um04433   | 0.0001   | ni     | hypophobin 3                                                                               |
| 9c00124  | 0.00924 | ni     | hypothetical protein                                            | um04898   | 0.0001   | ni     | related to RDS2 - Regulator of drug sensitivity                                            |
| 3c00016  | 0.00927 | K08874 | histone acetyltransferase SAGA, TRRAP/TRAI1 component           | um03923   | 0.0001   | ni     | conserved hypothetical protein                                                             |
| 12c00043 | 0.00929 | ni     | hypothetical protein                                            | um10648   | 0.0001   | ni     | related to DNF2 - Non-essential P-type ATPase                                              |
| 6c00084  | 0.00938 | K00598 | hypothetical protein                                            | um00736   | 0.0001   | ni     | conserved hypothetical protein                                                             |
| 22d00017 | 0.00942 | ni     | cellular O-acetyltransferase CRAT                               | um01984   | 0.0001   | K13953 | probable ADH1 - alcohol dehydrogenase I                                                    |
| 11c00042 | 0.00946 | K06669 | structural maintenance of chromosome protein 3                  | um10690   | 0.0001   | ni     | hypothetical protein                                                                       |
| 22c00034 | 0.00949 | K12767 | NDR and related serine/threonine kinases                        | um10070   | 0.0001   | ni     | related to Benzoate 4-monooxygenase                                                        |
| 7d00237  | 0.00951 | ni     | hypothetical protein                                            | um04384   | 0.0001   | K11344 | conserved hypothetical protein                                                             |
| 3c00034  | 0.00953 | ni     | ankyrin repeat protein                                          | um05328   | 0.0001   | ni     | conserved hypothetical protein                                                             |
| 2c00070  | 0.00954 | K08341 | microtubule-associated anchor protein                           | um02974   | 0.0001   | ni     | related to monomer-sensitive lipase                                                        |
| 26c00066 | 0.00958 | K11290 | DNA replication factor                                          | um04496   | 0.0001   | K00720 | related to Ceramide glucosyltransferase                                                    |
| 5d00120  | 0.00958 | K09496 | chaperonin complex component, TCP-1 delta subunit               | um02528   | 0.0001   | K13342 | related to PEX5 - peroxisomal targeting signal receptor                                    |
| 14c00108 | 0.0096  | ni     | hypothetical protein                                            | um03069   | 0.0001   | K01895 | probable acyl-CoA synthetase                                                               |
| 9c00202  | 0.00967 | ni     | hypothetical protein                                            | um01502   | 0.0001   | K01580 | related to GAD1 - glutamic decarboxylase                                                   |
| 25c00012 | 0.00971 | K00698 | chitin synthase/hyaluronan synthase                             | um11947   | 0.0001   | ni     | conserved hypothetical protein                                                             |
| 24c00049 | 0.00972 | K01955 | multifunctional pyrimidine synthesis protein CAD                | um00103   | 0.0001   | ni     | related to ESBP6 - similarity to Monocarboxylate transporter                               |
| 14d00047 | 0.00974 | ni     | hypothetical protein                                            | um12236   | 0.0001   | K16066 | probable NADP                                                                              |
| 13d00063 | 0.00979 | ni     | predicted Zn <sup>2+</sup> -dependent endopeptidase             | um04443   | 0.0001   | ni     | related to translation activator GCN1                                                      |
| 12c00019 | 0.00982 | ni     | putative N2                                                     | um10254   | 0.0001   | ni     | conserved hypothetical protein                                                             |
| 4c00008  | 0.00985 | K03469 | ribonuclease H                                                  | um01560   | 0.0001   | K10401 | related to kinesin                                                                         |
| 22d00146 | 0.00994 | ni     | hypothetical protein                                            | um00063   | 0.0001   | ni     | putative protein                                                                           |
| 22c00255 | 0.01002 | ni     | hypothetical protein                                            | um11848   | 0.0001   | ni     | probable Myosin regulatory light chain cdc4                                                |
| 2c00074  | 0.01004 | ni     | hypothetical protein                                            | um02990   | 0.0001   | ni     | conserved hypothetical protein                                                             |
| 9d00043  | 0.01007 | ni     | hypothetical protein                                            | um02382   | 0.0001   | ni     | α1-specific pheromone                                                                      |
| 5c00061  | 0.01013 | ni     | RNA-directed RNA polymerase QDE-1                               | um10585   | 0.0001   | ni     | conserved hypothetical protein                                                             |
| 22d00176 | 0.01013 | ni     | arylacamide deacetylase                                         | um01986   | 0.0001   | ni     | probable sterol carrier protein                                                            |
| 9d00439  | 0.01013 | ni     | hypothetical protein                                            | um01179   | 0.0001   | ni     | putative protein                                                                           |
| 27c00089 | 0.01018 | K14821 | U1-like Zn-finger-containing protein                            | um03524   | 0.0001   | K00276 | related to peroxisomal amine oxidase                                                       |
| 24c00042 | 0.01018 | ni     | protein required for meiosis                                    | um02404   | 0.0001   | K10751 | conserved hypothetical protein                                                             |
| 9c00283  | 0.01019 | ni     | predicted signal transduction protein                           | um00688   | 0.0001   | ni     | related to bacterial leucyl aminopeptidase precursor                                       |
| 12c00133 | 0.01025 | ni     | hypothetical protein                                            | um06072   | 0.0001   | K13719 | conserved hypothetical protein                                                             |
| 26c00036 | 0.01027 | ni     | serine/threonine protein phosphatase                            | um02024   | 0.0001   | K00224 | probable GCY2 - glycine decarboxylase P subunit                                            |
| 9c00136  | 0.0103  | K10433 | 5'-phosphoribosylglycinamide formyltransferase                  | um15103   | 0.0001   | K09051 | related to transcription factor ATF4</                                                     |

|          |         |        |                                                                   |           |         |        |                                                                                    |
|----------|---------|--------|-------------------------------------------------------------------|-----------|---------|--------|------------------------------------------------------------------------------------|
| 15d00067 | 0.01098 | ni     | hypothetical protein                                              | um04972   | 0.00029 | ni     | related to NFU-1 protein                                                           |
| 27d00071 | 0.01104 | K02958 | 40S ribosomal protein S15                                         | um03408   | 0.00029 | K00480 | related to Salicylate hydroxylase                                                  |
| 20d0019  | 0.01105 | K01886 | glutamyl-tRNA synthetase                                          | um10599   | 0.00029 | K0167  | probable branched-chain alpha-keto acid dehydrogenase e1-beta subunit              |
| 9c00358  | 0.01105 | K02951 | 40S ribosomal protein S6                                          | um00466   | 0.0003  | ni     | hypothetical protein                                                               |
| 26c0037  | 0.01113 | ni     | Ca <sup>2+</sup> -dependent lipid-binding protein CLB1            | um10170   | 0.00031 | K05658 | related to multidrug resistance protein 1                                          |
| 25c0052  | 0.01123 | ni     | predicted DNA-binding protein                                     | um10718.2 | 0.00031 | K00698 | chitin synthase 1                                                                  |
| 12c0078  | 0.01123 | ni     | FOG, RRM domain                                                   | um01458   | 0.00031 | K02327 | probable DNA polymerase delta catalytic subunit                                    |
| 7c03212  | 0.01123 | ni     | FOG, RRM domain                                                   | um06392   | 0.00031 | ni     | conserved hypothetical protein                                                     |
| 20d0026  | 0.01132 | ni     | hypothetical protein                                              | um11269   | 0.00031 | ni     | conserved hypothetical protein                                                     |
| 9c00414  | 0.01133 | ni     | hypothetical protein                                              | um06426   | 0.00031 | K13509 | related to SLC1 - 1-acyl-sn-glycerol-3-phosphate acyltransferase                   |
| 9000369  | 0.01133 | K02258 | cytochrome oxidase assembly factor COX11                          | um05984   | 0.00031 | K15371 | probable glutamate dehydrogenase                                                   |
| 15c0063  | 0.01136 | ni     | possible phosphatase                                              | um10763   | 0.00032 | K01759 | probable glyoxylase 1                                                              |
| 13d00055 | 0.01137 | K12818 | DEAH-box RNA helicase                                             | um02204   | 0.00032 | ni     | related to beta-galactosidase                                                      |
| 22d00273 | 0.01159 | K00020 | fructose 1,6-bisphosphate aldolase                                | um11220   | 0.00033 | K00728 | related to dolichyl-phosphate-mannose-protein mannosyltransferase                  |
| 90c0059  | 0.0116  | ni     | hypothetical protein                                              | um00530   | 0.00033 | ni     | conserved hypothetical protein                                                     |
| 20c0050  | 0.01164 | K14820 | RNA-binding protein required for biogenesis of the ribosomal 60S  | um02481   | 0.00034 | ni     | conserved hypothetical protein                                                     |
| 22d0160  | 0.01166 | ni     | hypothetical protein                                              | um05059   | 0.00034 | K00643 | probable 5-aminolevulinic acid synthase                                            |
| 27c00003 | 0.01167 | K00720 | ceramide glucosyltransferase                                      | um03890   | 0.00034 | ni     | hypothetical protein                                                               |
| 22d00111 | 0.0117  | K13577 | mitochondrial oxoglutarate/malate carrier proteins                | um10752   | 0.00034 | ni     | conserved hypothetical protein                                                     |
| 8c00101  | 0.01172 | K11558 | uncharacterized conserved protein                                 | um11951   | 0.00034 | ni     | putative protein                                                                   |
| 3c00049  | 0.01176 | K12670 | oligosaccharyltransferase, beta subunit                           | um00050   | 0.00034 | ni     | putative protein                                                                   |
| 27d00002 | 0.01177 | ni     | hypothetical protein                                              | um04382   | 0.00035 | ni     | probable methylcrotonyl-CoA carboxylase biotin carboxylase chain                   |
| 90c0027  | 0.01187 | ni     | hypothetical protein                                              | um10676   | 0.00035 | ni     | conserved hypothetical protein                                                     |
| 13d00036 | 0.01187 | K00309 | FAD-dependent oxidoreductase                                      | um00430   | 0.00035 | K00605 | probable GCV1 - glycine decarboxylase                                              |
| 3c00026  | 0.01194 | ni     | mu-crystallin                                                     | um10318   | 0.00035 | K10735 | conserved hypothetical protein                                                     |
| 13d00032 | 0.01199 | ni     | glucosylase                                                       | um11315   | 0.00036 | ni     | putative protein                                                                   |
| 22d00095 | 0.012   | K00111 | vacuolar H <sup>+</sup> -ATPase V1 sector, subunit B              | um03806   | 0.00036 | ni     | hypothetical protein                                                               |
| 14d00086 | 0.01213 | K13348 | peroxisomal membrane protein MPV17 and related proteins           | um03740   | 0.00036 | K11267 | related to PDS5 - precocious dissociation of sister chromatids                     |
| 26c00038 | 0.01216 | K01870 | isoleucyl-tRNA synthetase                                         | um12325   | 0.00037 | ni     | hypothetical protein                                                               |
| 25c00004 | 0.01222 | ni     | hypothetical protein                                              | um10310   | 0.00037 | K00868 | related to pyridoxal kinase                                                        |
| 13d00110 | 0.01222 | ni     | hypothetical protein                                              | um12007   | 0.00037 | ni     | related to cellulase                                                               |
| 26d00058 | 0.01228 | ni     | sensory transduction histidine kinase                             | um02005   | 0.00037 | ni     | conserved hypothetical protein                                                     |
| 7c00081  | 0.01232 | K02934 | 60S ribosomal protein L6                                          | um12085   | 0.00037 | ni     | conserved hypothetical protein                                                     |
| 7c00057  | 0.01235 | K05544 | uncharacterized conserved protein                                 | um04224   | 0.00038 | K11548 | related to Myosin-like protein NUF2                                                |
| 26d00057 | 0.01241 | ni     | hypothetical protein                                              | um03835   | 0.00038 | ni     | putative protein                                                                   |
| 6c00031  | 0.01242 | ni     | hypothetical protein                                              | um00265   | 0.00039 | ni     | related to pyruvate dehydrogenase complex protein X precursor                      |
| 5c00040  | 0.01243 | ni     | hypothetical protein                                              | um05153   | 0.00039 | ni     | related to MNT4 - putative alpha-1                                                 |
| 21c00005 | 0.01244 | ni     | hypothetical protein                                              | um12331   | 0.00039 | ni     | conserved hypothetical protein                                                     |
| 7c00100  | 0.01272 | ni     | lysophosphatidic acid acyltransferase endophilin/SH3GL            | um00735   | 0.00039 | ni     | conserved hypothetical protein                                                     |
| 22d0153  | 0.01273 | ni     | Ca <sup>2+</sup> transporting ATPase                              | um04288   | 0.00039 | ni     | conserved hypothetical protein                                                     |
| 13c00082 | 0.01275 | ni     | hypothetical protein                                              | um10985   | 0.0004  | K00872 | probable THR1 - homoserine kinase                                                  |
| 20c00034 | 0.01278 | K01210 | hypothetical protein                                              | um00385   | 0.0004  | ni     | putative protein                                                                   |
| 25d00037 | 0.01281 | ni     | hypothetical protein                                              | um11963   | 0.00041 | ni     | conserved hypothetical protein                                                     |
| 7c00094  | 0.01282 | K00681 | gamma-glutamyltransferase                                         | um11714   | 0.00041 | ni     | putative protein                                                                   |
| 9c00160  | 0.01282 | ni     | hypothetical protein                                              | um05429   | 0.00041 | K14404 | related to Cleavage and polyadenylation specificity factor                         |
| 19d00159 | 0.01288 | K09448 | TEF-1 and related transcription factor                            | um01953   | 0.00041 | ni     | conserved hypothetical protein                                                     |
| 18d00076 | 0.0129  | K01890 | phenylalanyl-tRNA synthetase beta subunit                         | um00028   | 0.00041 | ni     | conserved hypothetical protein                                                     |
| 22c0249  | 0.01294 | ni     | hypothetical protein                                              | um02158   | 0.00042 | K15428 | conserved hypothetical protein                                                     |
| 24c0008  | 0.01296 | K00958 | ATP sulfurylase                                                   | um10097   | 0.00042 | ni     | conserved hypothetical protein                                                     |
| 4c00036  | 0.01299 | ni     | hypothetical protein                                              | um10851   | 0.00042 | ni     | conserved hypothetical protein                                                     |
| 7c00175  | 0.01301 | K01889 | phenylalanyl-tRNA synthetase                                      | um10370   | 0.00042 | ni     | conserved hypothetical protein                                                     |
| 20d00012 | 0.01302 | K12591 | exosome 3'-5' exonuclease complex, subunit PM/SCL-100             | um06163   | 0.00042 | ni     | conserved hypothetical protein                                                     |
| 10c0001  | 0.01302 | K00852 | phosphoglucomutase and endoribonuclease ERN1/IRE                  | um00598   | 0.00042 | ni     | putative protein                                                                   |
| 7c00025  | 0.01317 | K06053 | recombination signal binding protein-J kappa                      | um10781   | 0.00042 | K00799 | related to glutathione S-transferase                                               |
| 13d00093 | 0.0132  | ni     | pleiotropic drug resistance proteins                              | um01172   | 0.00043 | K00234 | probable SDH1 - succinate dehydrogenase                                            |
| 22d00027 | 0.01323 | ni     | hypothetical protein                                              | um03824   | 0.00043 | K06215 | probable Pyridoxine biosynthesis protein PDX1                                      |
| 4c00011  | 0.01326 | ni     | hormone-sensitive lipase HSL                                      | um04420   | 0.00043 | ni     | related to ECM31 - 3-methyl-2-oxobutanate hydroxymethyltransferase                 |
| 9c00020  | 0.01326 | K00670 | N-terminal acetyltransferase                                      | um12334   | 0.00043 | ni     | conserved hypothetical protein                                                     |
| 3c00068  | 0.01341 | K17081 | prohibitin-like protein                                           | um10407   | 0.00043 | ni     | conserved hypothetical protein                                                     |
| 22d00217 | 0.01366 | K00108 | glucose dehydrogenase                                             | um04801.2 | 0.00044 | ni     | related to Glutathione S-transferase II                                            |
| 22c00244 | 0.01367 | ni     | predicted transporter                                             | um05445   | 0.00044 | ni     | hypothetical protein                                                               |
| 19d00063 | 0.01374 | ni     | hypothetical protein                                              | um00044   | 0.00044 | ni     | related to multidrug resistance-associated protein                                 |
| 16d00073 | 0.0138  | ni     | hypothetical protein                                              | um05985   | 0.00045 | ni     | putative protein                                                                   |
| 19c00139 | 0.0138  | K05758 | actin-related protein Arp2/3 complex, subunit ARPC2               | um15074   | 0.00045 | ni     | related to ABC transporter                                                         |
| 7d00157  | 0.01384 | ni     | predicted mitochondrial carrier protein                           | um12049   | 0.00045 | ni     | conserved hypothetical protein                                                     |
| 18d00094 | 0.01384 | ni     | hypothetical protein                                              | um03468   | 0.00046 | ni     | conserved hypothetical protein                                                     |
| 14c00005 | 0.01385 | ni     | hypothetical protein                                              | um01385   | 0.00046 | K06127 | probable CO-5 - ubiquinone biosynthesis                                            |
| 12d00134 | 0.01391 | K07047 | hypothetical protein                                              | um15096   | 0.00046 | ni     | related to cAMP-independent regulatory protein pac2                                |
| 26c00070 | 0.01393 | ni     | protein involved in high osmolarity signaling pathway             | um03376   | 0.00046 | K14550 | conserved hypothetical protein                                                     |
| 26c00074 | 0.01394 | ni     | hypothetical protein                                              | um06082   | 0.00047 | ni     | related to NIP-SNAP protein                                                        |
| 12c00002 | 0.01392 | ni     | hypothetical protein                                              | um10723   | 0.00048 | ni     | related to cellulase                                                               |
| 6c00104  | 0.01406 | ni     | hypothetical protein                                              | um05663   | 0.00049 | ni     | conserved hypothetical protein                                                     |
| 5c00137  | 0.01419 | ni     | hypothetical protein                                              | um10641   | 0.00049 | ni     | related to SKT5 - protoplast regeneration and killer toxin resistance protein      |
| 18c00036 | 0.0142  | K13179 | ATP-dependent RNA helicase pitchoune                              | um02497   | 0.00049 | ni     | conserved hypothetical protein                                                     |
| 22c01073 | 0.01422 | ni     | hypothetical protein                                              | um06121   | 0.00049 | ni     | putative protein                                                                   |
| 7d000203 | 0.01435 | ni     | perthiolinosyl deaminase                                          | um10439   | 0.00049 | ni     | conserved hypothetical protein                                                     |
| 20d00041 | 0.01445 | ni     | lysophosphatidic acid acyltransferase LPAAT and related acyltr    | um04771   | 0.0005  | ni     | related to KHA1 - Putative K                                                       |
| 14c00133 | 0.01446 | ni     | arylacamidase deacetylase                                         | um03120   | 0.0005  | ni     | conserved hypothetical protein                                                     |
| 7d00020  | 0.01455 | ni     | hypothetical protein                                              | um11033   | 0.0005  | ni     | putative protein                                                                   |
| 26c0006  | 0.01472 | K14963 | WD40 repeat-containing protein                                    | um05156   | 0.0005  | K07466 | probable Replication factor-A protein 1                                            |
| 13d00097 | 0.01473 | ni     | hypothetical protein                                              | um06381   | 0.00051 | ni     | putative protein                                                                   |
| 18c00080 | 0.01473 | ni     | hypothetical protein                                              | um02959   | 0.00051 | ni     | conserved hypothetical protein                                                     |
| 7d00246  | 0.01478 | ni     | hypothetical protein                                              | um12106   | 0.00051 | K01280 | related to Tripeptidyl-peptidase II                                                |
| 12c00057 | 0.01482 | K02951 | 40S ribosomal protein S12                                         | um11383   | 0.00052 | ni     | conserved hypothetical protein                                                     |
| 20c00075 | 0.01491 | K06052 | ras GTPase-activating protein RasGAP                              | um11534   | 0.00052 | K00413 | probable Cyt11 - cytochrome c1                                                     |
| 18d00026 | 0.01494 | ni     | protein containing adaptin N-terminal region                      | um02517   | 0.00052 | K04640 | guanine nucleotide-binding protein alpha-2 subunit                                 |
| 14c00111 | 0.01496 | K15275 | UDP-galactose transporter related protein                         | um01390   | 0.00053 | ni     | hypothetical protein                                                               |
| 22c00076 | 0.01501 | ni     | CCAAT-binding factor, subunit B                                   | um04716   | 0.00053 | K02148 | probable VMAS - H <sup>+</sup> -ATPase V1 domain 42 KD subunit                     |
| 9c00075  | 0.01502 | K03125 | transcription initiation factor TFIID, subunit TAF1               | um10835   | 0.00053 | ni     | related to Cytochrome b561                                                         |
| 24c0006  | 0.01512 | ni     | hypothetical protein                                              | um06430   | 0.00053 | ni     | probable heat shock protein HSP104                                                 |
| 20d00073 | 0.01512 | K01412 | mitochondrial processing peptidase, beta subunit, and related enu | um11121   | 0.00053 | K07213 | probable ATX1 - antioxidant protein and metal homeostasis factor                   |
| 7d00099  | 0.01517 | ni     | hypothetical protein                                              | um00562   | 0.00053 | ni     | conserved hypothetical protein                                                     |
| 4c00014  | 0.01522 | K00287 | phospholipase                                                     | um06073   | 0.00053 | ni     | related to DCU11 - Mannosidase                                                     |
| 9c00024  | 0.0153  | ni     | feric reductase                                                   | um02398   | 0.00054 | K00511 | related to squalene monooxygenase                                                  |
| 26d00094 | 0.01534 | K01840 | phosphomannomutase                                                | um02980   | 0.00054 | ni     | probable dihydroxy-acid dehydratase                                                |
| 26c00077 | 0.01547 | ni     | FOG, PPR repeat                                                   | um12091   | 0.00055 | ni     | conserved hypothetical protein                                                     |
| 26c00033 | 0.01547 | K01497 | bifunctional GTP cyclohydrolase II                                | um11961   | 0.00055 | ni     | conserved hypothetical protein                                                     |
| 13c00096 | 0.01547 | K11800 | WD40 repeat-containing protein                                    | um11719   | 0.00055 | ni     | conserved hypothetical protein                                                     |
| 22d00073 | 0.0155  | K12385 | cholesterol transport protein                                     | um02712   | 0.00056 | ni     | related to PCL6 - cyclin like protein interacting with Pho85p                      |
| 6c00086  | 0.01558 | K00924 | Ca <sup>2+</sup> /calmodulin-dependent protein kinase             | um05678   | 0.00057 | ni     | related to Glutathione S-transferase                                               |
| 19d00023 | 0.01563 | K01527 | RNA polymerase II general transcription factor BTF3 and related   | um10703   | 0.00058 | K14264 | related to BNA3 - Arylformamidase                                                  |
| 9c00161  | 0.01569 | ni     | hypothetical protein                                              | um01110   | 0.00058 | K06640 | related to serine-protein kinase atr                                               |
| 27d00059 | 0.01572 | K11673 | actin-related protein                                             | um1089.2  | 0.00058 | ni     | putative protein                                                                   |
| 9c00411  | 0.01579 | ni     | hypothetical protein                                              | um01135   | 0.00058 | ni     | ni                                                                                 |
| 19d00103 | 0.01583 | ni     | hypothetical protein                                              | um05574   | 0.0006  | ni     | conserved hypothetical protein                                                     |
| 22d00044 | 0.01595 | ni     | hypothetical protein                                              | um01656   | 0.0006  | ni     | probable sugar transporter                                                         |
| 26c00060 | 0.01591 | ni     | hypothetical protein                                              | um10394   | 0.00061 | K00287 | related to Dihydrodipicolinate reductase                                           |
| 6c00073  | 0.01602 | ni     | hypothetical protein                                              | um01433   | 0.00061 | ni     | related to Enoyl-CoA hydratase                                                     |
| 22c00067 | 0.01605 | ni     | hypothetical protein                                              | um00459   | 0.00061 | K06678 | related to Condensin complex subunit 3                                             |
| 22c00305 | 0.01605 | ni     | DEAD box-containing helicase-like transcription factor            | um00687   | 0.00062 | K11801 | conserved hypothetical protein                                                     |
| 16c00052 | 0.01609 | ni     | synaptic vesicle protein EHS-1 and related EH domain proteins     | um03418   | 0.00062 | ni     | putative protein                                                                   |
| 9c00062  | 0.01613 | ni     | monocarboxylate transporter                                       | um15024   | 0.00062 | ni     | putative protein                                                                   |
| 10d00027 | 0.01622 | ni     | hypothetical protein                                              | um02703   | 0.00062 | K03841 | probable FBP1 - fructose-1                                                         |
| 9c00350  | 0.01628 | ni     | hypothetical protein                                              | um02164   | 0.00063 | K03885 | probable NDE1 - mitochondrial cytosolically directed NADH dehydrogenase            |
| 8c00010  | 0.01631 | ni     | hypothetical protein                                              | um10688   | 0.00063 | ni     | related to PET112 - putative glutamyl-tRNA                                         |
| 20c00332 | 0.01639 | ni     | hypothetical protein                                              | um11558   | 0.00064 | ni     | related to neutral amino acid permease                                             |
| 24c00023 | 0.01639 | ni     | reductases with broad range of substrate specificities            | um01813   | 0.00064 | ni     | related to putative acetyl-coenzyme A transporter                                  |
| 14c00048 | 0.01641 | ni     | hypothetical protein                                              | um05442   | 0.00064 | ni     | related to monocarboxylate transporter 2                                           |
| 9c00105  | 0.01643 | ni     | hypothetical protein                                              | um01142   | 0.00064 | K17402 | related to RSM25 - mitochondrial ribosomal protein                                 |
| 8d00066  | 0.0165  | ni     | hypothetical protein                                              | um01515   | 0.00064 | K07393 | related to ECM4 - protein involved in cell wall biogenesis and architecture        |
| 14c00103 | 0.01654 | K00287 | glyoxylate reductase                                              | um02266   | 0.00065 | ni     | putative protein                                                                   |
| 18d00038 | 0.01655 | K00231 | protoporphyrinogen oxidase                                        | um00864   | 0.00065 | K09522 | probable ZUO1 - zuzin                                                              |
| 18d00081 | 0.01656 | K00281 | glycine dehydrogenase                                             | um11366   | 0.00066 | ni     | conserved hypothetical protein                                                     |
| 6c00020  | 0.01664 | ni     | hypothetical protein                                              | um10733   | 0.00066 | ni     | putative protein                                                                   |
| 13d00040 | 0.01675 | K15628 | peroxisomal long-chain acyl-CoA transporter                       | um03299   | 0.00066 | K01803 | probable TRH - triose-phosphate isomerase                                          |
| 27c00021 | 0.01696 | ni     | protein OS-9                                                      | um02006   | 0.00066 | ni     | conserved hypothetical protein                                                     |
| 22c00137 | 0.01697 | K02355 | mitochondrial elongation factor                                   | um04847   | 0.00067 | ni     | conserved hypothetical protein                                                     |
| 27c00022 | 0.01699 | ni     | hypothetical protein                                              | um03284   | 0.00067 | ni     | conserved hypothetical protein                                                     |
| 6c00052  | 0.01707 | ni     | hypothetical protein                                              | um00773   | 0.00067 | ni     | conserved hypothetical protein                                                     |
| 8c00154  | 0.01709 | K14521 | predicted P-loop ATPase fused to an acetyltransferase             | um05883   | 0.00067 | K07006 | conserved hypothetical protein                                                     |
| 8d00014  | 0.01714 | ni     | hypothetical protein                                              | um00308   | 0.00069 | K10771 | related to APN1 - AP endonuclease                                                  |
| 14c00112 | 0.01717 | ni     | hypothetical protein                                              | um10560   | 0.0007  | K09263 | conserved hypothetical protein                                                     |
| 19d00140 | 0.01729 | K12852 | US snRNP-specific protein                                         | um04096   | 0.0007  | ni     | hypothetical protein                                                               |
| 2c00081  | 0.01743 | K03857 | N-acetylglucosaminyltransferase complex, subunit PIG-A/SPT14      | um01101   | 0.0007  | K01101 | related to PDR16 - protein involved in lipid biosynthesis and multidrug resistance |
| 22c00043 | 0.01759 | ni     | hypothetical protein                                              | um05355   | 0.      |        |                                                                                    |

|          |         |        |                                                                    |           |         |        |                                                                                                 |
|----------|---------|--------|--------------------------------------------------------------------|-----------|---------|--------|-------------------------------------------------------------------------------------------------|
| 22d00119 | 0.01855 | K01899 | succinyl-coa synthetase, alpha subunit                             | um12250   | 0.00077 | ni     | conserved hypothetical protein                                                                  |
| 3d00069  | 0.01855 | ni     | hypothetical protein                                               | um10637   | 0.00078 | ni     | conserved hypothetical protein                                                                  |
| 9d00270  | 0.01855 | ni     | FOG, Zn-finger                                                     | um10806   | 0.00078 | ni     | conserved hypothetical protein                                                                  |
| 6d00039  | 0.01855 | ni     | glutathione S-transferase                                          | um11280   | 0.00078 | ni     | conserved hypothetical protein                                                                  |
| 12d00040 | 0.01863 | ni     | TFIIF-interacting CTD phosphatase, including NLI-interacting fac   | um03382   | 0.00078 | ni     | related to 3-phytase A precursor                                                                |
| 27c00096 | 0.01867 | ni     | hypothetical protein                                               | um01904   | 0.00078 | ni     | related to succinyl-coa ligase                                                                  |
| 22d00041 | 0.01867 | ni     | hypothetical protein                                               | um03845   | 0.00078 | K00237 | related to succinate dehydrogenase                                                              |
| 16d00047 | 0.01873 | K00826 | histone H4 acetyltransferase BCAT1                                 | um02438   | 0.00079 | ni     | conserved hypothetical protein                                                                  |
| 11d00012 | 0.01888 | ni     | hypothetical protein                                               | um05570   | 0.00079 | ni     | conserved hypothetical protein                                                                  |
| 24c00007 | 0.01896 | ni     | predicted membrane protein                                         | um10946   | 0.00079 | ni     | related to TNA1 - High affinity nicotinic acid plasma membrane permease                         |
| 70d00255 | 0.01896 | ni     | hypothetical protein                                               | um03105   | 0.00079 | ni     | hypothetical protein                                                                            |
| 18d00003 | 0.01914 | K14857 | putative 5'-3' dependent RNA methyltransferase SPB1                | um06124   | 0.00079 | ni     | hypothetical protein                                                                            |
| 28d00089 | 0.01909 | ni     | hypothetical protein                                               | um00935   | 0.0008  | ni     | probable MDR1 - Mac1p interacting protein                                                       |
| 9c0d0435 | 0.01914 | ni     | hypothetical protein                                               | um01205   | 0.0008  | ni     | cation-transporting ATPase                                                                      |
| 12c00024 | 0.01915 | ni     | hypothetical protein                                               | um04614   | 0.0008  | ni     | conserved hypothetical Ustilago-specific protein                                                |
| 22d0186  | 0.01925 | ni     | hypothetical protein                                               | um02710   | 0.00081 | K11254 | probable HPH1 - histone H4                                                                      |
| 22d00241 | 0.01925 | ni     | predicted L-carnitine dehydratase                                  | um04885   | 0.00081 | ni     | conserved hypothetical protein                                                                  |
| 13c00056 | 0.01926 | ni     | uncharacterized conserved protein                                  | um10181   | 0.00082 | ni     | conserved hypothetical protein                                                                  |
| 7c00215  | 0.01928 | ni     | molecular chaperone Prefoldin, subunit 5                           | um10051   | 0.00083 | K02910 | probable 60S ribosomal protein L31                                                              |
| 22c00282 | 0.01937 | ni     | hypothetical protein                                               | um10575   | 0.00084 | ni     | hypothetical protein                                                                            |
| 3d00024  | 0.01939 | K10838 | nucleotide excision repair complex XPC-HR23B, subunit XPC/D        | um05198   | 0.00085 | ni     | ni                                                                                              |
| 12c00146 | 0.01947 | ni     | predicted transporter                                              | um01688   | 0.00085 | K14284 | related to mRNA export factor mex67                                                             |
| 18c00128 | 0.01957 | ni     | acetylcholinesterase                                               | um12124   | 0.00085 | ni     | hypothetical protein                                                                            |
| 14d00016 | 0.01959 | K13172 | Splicing coactivator SRm160/300, subunit SRm300                    | um00087   | 0.00086 | ni     | conserved hypothetical protein                                                                  |
| 8c000176 | 0.01967 | K13126 | polyadenylate-binding protein                                      | um10476   | 0.00086 | ni     | hypothetical protein                                                                            |
| 19d00010 | 0.01985 | ni     | hypothetical protein                                               | um00989   | 0.00089 | ni     | related to short-chain alcohol dehydrogenase                                                    |
| 9c00231  | 0.01986 | ni     | hypothetical protein                                               | um05403   | 0.0009  | K04802 | probable proliferating cell nuclear antigen                                                     |
| 7d00215  | 0.01999 | ni     | hypothetical protein                                               | um01699   | 0.00091 | ni     | conserved hypothetical protein                                                                  |
| 7d00117  | 0.02002 | ni     | hypothetical protein                                               | um04939   | 0.00091 | K01476 | probable arginase                                                                               |
| 5c00005  | 0.02007 | ni     | nuclear architecture related protein                               | um05452.2 | 0.00091 | ni     | related to TPO3 - Polyamine transport protein                                                   |
| 25c00003 | 0.02011 | ni     | hypothetical protein                                               | um02152   | 0.00091 | ni     | conserved hypothetical Ustilago-specific protein                                                |
| 18d00033 | 0.02026 | K17415 | hypothetical protein                                               | um10003   | 0.00092 | ni     | conserved hypothetical protein                                                                  |
| 24d00002 | 0.02026 | K11367 | chromodomain-helicase DNA-binding protein                          | um12048   | 0.00092 | K01495 | probable FOL2 - GTP cyclohydrolase I                                                            |
| 1c00038  | 0.02027 | ni     | kinesin-like protein                                               | um10077   | 0.00092 | K11173 | probable alcohol dehydrogenase                                                                  |
| 14c00055 | 0.02025 | K00022 | short-chain alcohol dehydrogenase                                  | um00093   | 0.00093 | K10866 | probable RAD50 - DNA repair protein                                                             |
| 18c00054 | 0.02052 | ni     | hypothetical protein                                               | um06033   | 0.00094 | ni     | related to LRP16 protein                                                                        |
| 11c00008 | 0.02055 | ni     | hypothetical protein                                               | um03888   | 0.00094 | ni     | related to multidrug resistant protein                                                          |
| 14c00131 | 0.02062 | K12603 | glucose-repressible alcohol dehydrogenase transcriptional effector | um11438   | 0.00095 | ni     | conserved hypothetical protein                                                                  |
| 9d00098  | 0.02062 | ni     | uncharacterized conserved protein                                  | um11807   | 0.00097 | K00765 | probable ATP phosphoribosyltransferase                                                          |
| 9c001198 | 0.02084 | K12599 | cytoplasmic exosomal RNA helicase SKI2                             | um01782   | 0.00097 | K13354 | related to peroxisomal membrane protein PMP47B                                                  |
| 6d00050  | 0.02084 | K08139 | predicted transporter                                              | um11980   | 0.00097 | ni     | putative protein                                                                                |
| 5c00026  | 0.02084 | K01092 | inositol monophosphatase                                           | um01711   | 0.00098 | ni     | related to Glucose dehydrogenase                                                                |
| 15d00080 | 0.02086 | ni     | cation transport ATPase                                            | um01643   | 0.00098 | K07827 | small G-protein Ras2                                                                            |
| 12c00332 | 0.02096 | K15278 | UDP-N-acetylglucosamine transporter                                | um10020   | 0.00098 | K16330 | conserved hypothetical protein                                                                  |
| 10d00085 | 0.02105 | ni     | hypothetical protein                                               | um01997   | 0.00099 | K01175 | related to REX4 - strong similarity to X                                                        |
| 12d00044 | 0.02107 | ni     | hypothetical protein                                               | um00132   | 0.001   | ni     | hypothetical protein                                                                            |
| 5c00018  | 0.02112 | ni     | hypothetical protein                                               | um10211   | 0.001   | K01210 | related to EXG1 - exo-beta-1                                                                    |
| 9d00174  | 0.02115 | ni     | hypothetical protein                                               | um02878   | 0.001   | ni     | conserved hypothetical protein                                                                  |
| 9d00363  | 0.02119 | ni     | MEKK and related serine/threonine protein kinases                  | um05792   | 0.00101 | ni     | related to Chitin deacetylase precursor                                                         |
| 3c00019  | 0.02123 | ni     | uncharacterized conserved protein                                  | um10757   | 0.00101 | ni     | conserved hypothetical protein                                                                  |
| 24d0006  | 0.02125 | K14050 | protein geranylgeranyltransferase type II, alpha subunit           | um03486   | 0.00103 | ni     | related to nucleotide binding protein                                                           |
| 22c00250 | 0.02138 | ni     | predicted transporter                                              | um02189   | 0.00103 | K00020 | probable 3-hydroxyisobutyrate dehydrogenase                                                     |
| 2c00016  | 0.02144 | ni     | multisubunit glutamine exporter                                    | um01371   | 0.00104 | ni     | ni                                                                                              |
| 8d00078  | 0.02146 | K14640 | Nav/Pi symporter                                                   | um15085   | 0.00105 | ni     | related to peptide-n4-                                                                          |
| 7d00093  | 0.02162 | ni     | hypothetical protein                                               | um04796   | 0.00106 | ni     | conserved hypothetical protein                                                                  |
| 22d00113 | 0.02164 | ni     | hypothetical protein                                               | um00548   | 0.00106 | ni     | related to GDA1 - guanosine diphosphatase                                                       |
| 3c00061  | 0.02167 | ni     | hypothetical protein                                               | um03623   | 0.00107 | ni     | conserved hypothetical protein                                                                  |
| 7c000330 | 0.02171 | ni     | hypothetical protein with different specificities                  | um03088   | 0.00107 | ni     | conserved hypothetical protein                                                                  |
| 14d00050 | 0.02183 | K10352 | myosin class II heavy chain                                        | um10738   | 0.00108 | K11984 | conserved hypothetical protein                                                                  |
| 10c00038 | 0.0219  | K03321 | sulfate/bicarbonate/oxalate exchanger SAT-1 and related transpo    | um10252   | 0.00108 | K00059 | related to 3-oxoacyl-                                                                           |
| 2c00078  | 0.0219  | K01768 | serine/threonine phosphatase 2C                                    | um01663   | 0.00108 | ni     | conserved hypothetical protein                                                                  |
| 6c00076  | 0.02191 | ni     | endoplasmic reticulum chaperones                                   | um10140   | 0.00108 | ni     | conserved hypothetical protein                                                                  |
| 22c00245 | 0.02194 | ni     | hypothetical protein                                               | um11051   | 0.0011  | ni     | putative protein                                                                                |
| 14d00099 | 0.02203 | ni     | endoplasmic reticulum protein EP58                                 | um11362   | 0.0011  | ni     | putative protein                                                                                |
| 6d00083  | 0.02209 | ni     | hypothetical protein                                               | um11219   | 0.00111 | K08489 | related to TLG2 - member of the syntaxin family of t-SNAREs                                     |
| 16c00032 | 0.02214 | ni     | oxysterol-binding protein                                          | um11458.2 | 0.00111 | ni     | conserved hypothetical protein                                                                  |
| 1c000037 | 0.0223  | ni     | emp24/25/26/24 family of membrane trafficking proteins             | um02847   | 0.00112 | ni     | conserved hypothetical Ustilago-specific protein                                                |
| 12d00100 | 0.02251 | K03233 | translation elongation factor EF-1 gamma                           | um03347   | 0.00112 | ni     | related to NUM1 - nuclear migration protein                                                     |
| 14c00015 | 0.02258 | K08737 | mismatch repair ATPase MSH6                                        | um02492   | 0.00112 | ni     | conserved hypothetical protein                                                                  |
| 18c00071 | 0.0227  | ni     | Ca2+-binding transmembrane protein LETM1/MRS7                      | um00634   | 0.00113 | K03943 | probable NADH-ubiquinone oxidoreductase 24 kDa subunit                                          |
| 7d000254 | 0.02285 | K01958 | endoplasmic chaperone                                              | um00989   | 0.00113 | K1692  | related to zinc transporter                                                                     |
| 8c00024  | 0.02279 | ni     | hypothetical protein                                               | um12273.2 | 0.00114 | K12840 | conserved hypothetical protein                                                                  |
| 22c00075 | 0.02279 | ni     | predicted RNA polymerase III subunit C17                           | um00255   | 0.00114 | ni     | conserved hypothetical protein                                                                  |
| 12d00092 | 0.02285 | ni     | predicted GTPase-activating protein                                | um11953   | 0.00115 | K01408 | related to STE23 - Metalloprotease involved in a-factor processing                              |
| 16c00036 | 0.02298 | K03283 | molecular chaperones Hsp70/Hsc70                                   | um04878   | 0.00115 | K14572 | related to MDN1 - Huge dynein-related AAA-type ATPase                                           |
| 27c00032 | 0.02298 | ni     | non-smc                                                            | um05240   | 0.00116 | K13304 | probable ESA1 - histone acetyltransferase                                                       |
| 22c00258 | 0.02319 | ni     | hypothetical protein                                               | um00490   | 0.00117 | ni     | related to Sorting nexin MVP1                                                                   |
| 7c00024  | 0.02352 | K12826 | splicing factor 3a, subunit 2                                      | um00830   | 0.00117 | ni     | conserved hypothetical protein                                                                  |
| 7c00170  | 0.02355 | ni     | hypothetical protein                                               | um15997   | 0.00118 | ni     | putative protein                                                                                |
| 11c00035 | 0.02355 | ni     | hypothetical protein                                               | um00298   | 0.00119 | K01580 | related to glutamic acid decarboxylase                                                          |
| 10d00007 | 0.02359 | K11649 | chromatin remodeling factor subunit and related transcription fact | um11162   | 0.00119 | K03935 | probable NADH dehydrogenase                                                                     |
| 3d00049  | 0.02361 | ni     | synaptic vesicle transporter SVOP and related transporters         | um10685   | 0.00121 | K03627 | probable MBF1 - multiprotein bridging factor mediates GCN4-dependent transcriptional activation |
| 7d00158  | 0.02362 | ni     | regulator of arginine metabolism and related MADS box-contains     | um01714   | 0.00121 | ni     | probable monoxygenase                                                                           |
| 13d00020 | 0.02362 | ni     | hypothetical protein                                               | um03351   | 0.00123 | K06174 | probable RLI1 - Protein promoting preinitiation complex assembly                                |
| 9d001190 | 0.02372 | ni     | PHD Zn-finger proteins                                             | um00385   | 0.00123 | ni     | conserved hypothetical protein                                                                  |
| 10d00017 | 0.02381 | K12867 | mRNA splicing factor                                               | um05691   | 0.00123 | ni     | hypothetical protein                                                                            |
| 22d00101 | 0.02393 | ni     | predicted Yippee-type zinc-binding protein                         | um04055   | 0.00127 | ni     | ni                                                                                              |
| 9d00225  | 0.02395 | K00698 | chitin synthase/hyaluronan synthase                                | um11753   | 0.00128 | ni     | conserved hypothetical protein                                                                  |
| 5c00041  | 0.02399 | ni     | hypothetical protein                                               | um03807   | 0.0013  | ni     | conserved hypothetical protein                                                                  |
| 2d00016  | 0.02402 | ni     | hypothetical protein                                               | um02115   | 0.00131 | ni     | conserved hypothetical protein                                                                  |
| 13c00048 | 0.02446 | ni     | hypothetical protein                                               | um03262   | 0.00131 | K02365 | related to Separin                                                                              |
| 14c00073 | 0.02448 | ni     | hypothetical protein                                               | um12299   | 0.00131 | ni     | conserved hypothetical protein                                                                  |
| 9d00277  | 0.02448 | K07006 | hypothetical protein                                               | um02693   | 0.00131 | ni     | related to Endothelin-converting enzyme 1                                                       |
| 9c00347  | 0.02449 | ni     | hypothetical protein                                               | um04133   | 0.00132 | ni     | related to NAD                                                                                  |
| 9c00175  | 0.02462 | K12823 | ATP-dependent RNA helicase                                         | um11682   | 0.00132 | K00587 | related to STE14 - farnesyl cysteine carboxyl-methyltransferase                                 |
| 7c00034  | 0.02465 | ni     | ferric reductase                                                   | um03221   | 0.00132 | ni     | conserved hypothetical protein                                                                  |
| 12c00015 | 0.02492 | ni     | hypothetical protein                                               | um05385   | 0.00135 | ni     | guanine nucleotide-binding protein alpha-4 subunit                                              |
| 22c00284 | 0.02492 | ni     | hypothetical protein                                               | um03792   | 0.00137 | ni     | related to coenzyme a synthetase                                                                |
| 2c00008  | 0.0251  | K13342 | TPR repeat-containing protein                                      | um02105   | 0.00137 | K00074 | probable 3-hydroxybutyryl-CoA dehydrogenase                                                     |
| 7c00040  | 0.02511 | K11121 | NAD-dependent histone deacetylases and class I sirtuins            | um01037   | 0.00138 | ni     | conserved hypothetical protein                                                                  |
| 14d00075 | 0.02516 | ni     | hypothetical protein                                               | um10253.2 | 0.00138 | K01265 | related to MAP1 - methionine aminopetidase                                                      |
| 7c00240  | 0.02518 | ni     | predicted N-acetyltransferase                                      | um10242   | 0.00139 | ni     | putative protein                                                                                |
| 22c00248 | 0.02526 | K01288 | serine carboxypeptidases                                           | um01114   | 0.0014  | ni     | hypothetical protein                                                                            |
| 22c00079 | 0.02524 | K16575 | actin and related proteins                                         | um03822   | 0.00141 | ni     | putative protein                                                                                |
| 13d00010 | 0.02562 | ni     | hypothetical protein                                               | um01533   | 0.00143 | ni     | related to n-acetyltransferase                                                                  |
| 5d00079  | 0.02564 | ni     | hypothetical protein                                               | um05420   | 0.00144 | K12346 | related to vacuolar transport protein ESP1                                                      |
| 7d00169  | 0.02572 | ni     | defense-related protein containing SCP domain                      | um05922   | 0.00145 | ni     | related to COX10 - farnesyl transferase                                                         |
| 28c00029 | 0.02581 | ni     | hypothetical protein                                               | um00468   | 0.00145 | K00601 | related to glycylamide ribonucleotide transferase                                               |
| 18c00026 | 0.02584 | K16489 | hypothetical protein                                               | um11966.2 | 0.00146 | ni     | related to Cullin-3                                                                             |
| 5d00105  | 0.02593 | ni     | chromatin remodeling complex WSTF-ISWI, small subunit              | um04561   | 0.00147 | K00852 | conserved hypothetical protein                                                                  |
| 29c00023 | 0.02594 | K00031 | NADP-dependent isocitrate dehydrogenase                            | um03296   | 0.00147 | ni     | conserved hypothetical protein                                                                  |
| 25c00066 | 0.02596 | ni     | hypothetical protein                                               | um11246   | 0.00145 | ni     | conserved hypothetical protein                                                                  |
| 9d00035  | 0.02612 | K08869 | predicted unusual protein kinase                                   | um05977   | 0.00151 | ni     | conserved hypothetical protein                                                                  |
| 9d00119  | 0.02623 | K14326 | RNA helicase nonsense mRNA reducing factor                         | um12278   | 0.00151 | K10418 | probable Dynein light chain 1                                                                   |
| 6c00096  | 0.02627 | ni     | hypothetical protein                                               | um05162   | 0.00152 | K01952 | probable ADE6 - phosphoribosylformyl glycylamide synthetase                                     |
| 13c00042 | 0.02629 | ni     | hypothetical protein                                               | um10507   | 0.00153 | K03411 | probable ubiquinolipochrome-c reductase Rieske iron-sulfur protein                              |
| 9c00097  | 0.02628 | ni     | hypothetical protein                                               | um01164   | 0.00153 | ni     | conserved hypothetical protein                                                                  |
| 19d00049 | 0.02646 | ni     | predicted MutS-related protein                                     | um00046   | 0.00154 | ni     | related to flavin oxidoreductase                                                                |
| 10d00056 | 0.0265  | ni     | ras-related small GTPase                                           | um10730   | 0.00155 | K05767 | related to Ras GTPase-activating-like protein IQGAP2                                            |
| 25c00078 | 0.0265  | ni     | hypothetical protein                                               | um01428   | 0.00156 | ni     | conserved hypothetical protein                                                                  |
| 12c00123 | 0.02673 | K07889 | GTPase Rad53/YPT51                                                 | um04867   | 0.00157 | ni     | ni                                                                                              |
| 3c00028  | 0.02674 | ni     | hypothetical protein                                               | um02131   | 0.0016  | ni     | putative protein                                                                                |
| 6c00024  | 0.0268  | K06911 | hypothetical protein                                               | um11079   | 0.00161 | ni     | putative protein                                                                                |
| 22c00304 | 0.02686 | ni     | hypothetical protein                                               | um12288   | 0.00164 | ni     | conserved hypothetical protein                                                                  |
| 15d00063 | 0.02692 | ni     | hypothetical protein                                               | um02170   | 0.00165 | ni     | conserved hypothetical protein                                                                  |
| 6d00054  | 0.02701 | K07019 | alpha/beta hydrolase                                               | um11746   | 0.00168 | ni     | related to Guanine nucleotide-binding protein beta 5                                            |
| 7d00008  | 0.02711 | ni     | hypothetical protein                                               | um10529.2 | 0.00168 | ni     | conserved hypothetical protein                                                                  |
| 10d00111 | 0.02713 | K03457 | uridine permease                                                   | um10616   | 0.00169 | K16466 | probable CDC31 - spindle pole body component                                                    |
| 25d00052 | 0.02718 | ni     | hypothetical protein                                               | um11849   | 0.00169 | ni     | conserved hypothetical protein                                                                  |
| 8c00110  | 0.02721 | K12824 | hypothetical protein                                               | um02580   | 0.0017  | ni     | putative protein                                                                                |
| 16d00086 | 0.02723 | K11095 | U1 snRNP-specific protein C                                        | um11267   | 0.00171 | K00993 | related to EPT1 - sn-                                                                           |
| 7d00035  | 0.02731 | K12625 | small nuclear ribonucleoprotein F                                  | um03126   | 0.00173 | ni     | related to retinal short-chain dehydrogenase                                                    |
| 25d00079 | 0.02733 | ni     | hypothetical protein                                               | um01977   | 0.00173 | ni     | hypothetical protein                                                                            |
| 18d00044 | 0.02734 | ni     | ras GTPase-activator GAPCa6 and related TBC domain prote           | um00295   | 0.00175 | K04393 | GTP binding protein Cdc42                                                                       |
| 9d00105  | 0.02755 | ni     | mitochondrial carrier protein CGI-69                               | um04091   | 0.00175 | ni     | conserved hypothetical protein                                                                  |
| 9c00363  | 0.02778 | K05293 | major facilitator superfamily permease - Cdc91p                    | um01332   | 0.00177 | ni     | related to coenzyme A diphosphatase                                                             |



|          |         |        |                                                                   |           |         |         |                                                                                           |
|----------|---------|--------|-------------------------------------------------------------------|-----------|---------|---------|-------------------------------------------------------------------------------------------|
| 12c00144 | 0.02952 | K04618 | hypothetical protein                                              | um11497   | 0.00193 | K00972  | probable UDP-N-acetylglucosamine pyrophosphorylase                                        |
| 8000105  | 0.02963 | ni     | hypothetical protein                                              | um04922   | 0.00193 | ni      | related to 2                                                                              |
| 9c00353  | 0.02967 | ni     | FOG, LIM domain                                                   | um12240   | 0.00193 | ni      | putative protein                                                                          |
| 2200015  | 0.02969 | ni     | hypothetical protein                                              | um00712   | 0.00196 | ni      | probable YOR1 - ABC transporter                                                           |
| 22c00132 | 0.02988 | K12861 | spliceosome-associated coiled-coil protein                        | um12047   | 0.00197 | ni      | conserved hypothetical protein                                                            |
| 7400264  | 0.02994 | ni     | cytosolic sorting protein GGA2/TOM1                               | um10053   | 0.00199 | K01673  | related to carbonic anhydrase                                                             |
| 9c00184  | 0.03007 | ni     | hypothetical protein                                              | um04253   | 0.00201 | ni      | probable mima export factor eif1                                                          |
| 24c00057 | 0.03012 | ni     | hypothetical protein                                              | um00237   | 0.00201 | K15084  | probable LEU5 - mitochondrial coenzyme A transporter- member of the mitochondrial carrier |
| 9c00097  | 0.03023 | ni     | uncharacterized conserved protein                                 | um06368   | 0.00203 | K10808  | probable small subunit of ribonucleotide reductase                                        |
| 9000364  | 0.03028 | K11375 | hypothetical protein                                              | um00770   | 0.00205 | K01937  | probable URA7 - CTP synthase 1                                                            |
| 18c00029 | 0.03033 | ni     | carboxylesterase and related proteins                             | um11080   | 0.00211 | ni      | putative protein                                                                          |
| 27c00040 | 0.03031 | ni     | hypothetical protein                                              | um06489   | 0.00212 | ni      | conserved hypothetical protein                                                            |
| 22c00016 | 0.03037 | ni     | hypothetical protein                                              | um10094   | 0.00213 | ni      | putative protein                                                                          |
| 22c00144 | 0.03053 | ni     | predicted short chain-type dehydrogenase                          | um04535   | 0.00213 | ni      | conserved hypothetical protein                                                            |
| 8c00108  | 0.03053 | ni     | translational repressor MPT5/PUF4 and related RNA-binding pro     | um11105   | 0.00213 | K02575  | related to nitrate transporter                                                            |
| 2000031  | 0.03057 | ni     | hypothetical protein                                              | um04819   | 0.00214 | ni      | related to protein phosphatase 2c                                                         |
| 2c00056  | 0.03061 | ni     | hypothetical protein                                              | um00179   | 0.00215 | ni      | conserved hypothetical protein                                                            |
| 16c00024 | 0.03065 | ni     | hypothetical protein                                              | um02765   | 0.00215 | ni      | conserved hypothetical protein                                                            |
| 12c00125 | 0.03065 | ni     | nuclear transport receptor exportin 4                             | um02165   | 0.00216 | ni      | conserved hypothetical protein                                                            |
| 10c00024 | 0.03067 | ni     | hypothetical protein                                              | um10450   | 0.00217 | ni      | related to transcriptional regulator rds2                                                 |
| 7400118  | 0.03111 | ni     | HMC box-containing protein                                        | um05218   | 0.00217 | K00293  | probable chimeric spermidine synthase                                                     |
| 14c00011 | 0.03127 | ni     | hypothetical protein                                              | um00166   | 0.00217 | ni      | conserved hypothetical protein                                                            |
| 10c00101 | 0.03128 | ni     | hypothetical protein                                              | um06130   | 0.00217 | K12827  | related to RNA splicing factor PRP9                                                       |
| 9c00076  | 0.03128 | K09481 | hypothetical protein                                              | um05840   | 0.00221 | ni      | conserved hypothetical protein                                                            |
| 20c00045 | 0.03129 | K13941 | dihydropterate synthase                                           | um02460   | 0.00225 | ni      | putative protein                                                                          |
| 7c00138  | 0.03137 | ni     | predicted dehydrogenase                                           | um10939   | 0.00227 | ni      | ni                                                                                        |
| 9c00038  | 0.03147 | K11971 | predicted E3 ubiquitin ligase                                     | um02236   | 0.00228 | ni      | conserved hypothetical protein                                                            |
| 19c00074 | 0.03153 | K00668 | hypothetical protein                                              | um06047   | 0.00228 | K00641  | related to homoserine O-acetyltransferase                                                 |
| 19c00063 | 0.03163 | ni     | FOG, RRM domain                                                   | um05131   | 0.00229 | K01907  | probable Acetoacetyl-CoA synthetase                                                       |
| 22c00064 | 0.03176 | K10401 | kinesin-like protein                                              | um10509   | 0.0023  | ni      | related to DNA repair protein Rad52                                                       |
| 9c00338  | 0.03192 | K02145 | vacuolar H+-ATPase V1 sector, subunit A                           | um00237   | 0.00232 | K08139  | probable HKT5 - Hecose transporter                                                        |
| 26c00057 | 0.03182 | K03032 | 26S proteasome regulatory complex, subunit RPN2/PSMD1             | um02185   | 0.00232 | K12734  | probable peptidylprolyl isomerase                                                         |
| 3c00042  | 0.03185 | K08286 | NDR and related serine/threonine kinases                          | um06103   | 0.00232 | K00888  | related to phosphatidylinositol-4-kinase                                                  |
| 12c00062 | 0.03188 | ni     | hypothetical protein                                              | um05897   | 0.00233 | K01293  | probable CPS1 - Gly-X carboxypeptidase YSC5 precursor                                     |
| 7400328  | 0.03189 | ni     | hypothetical protein                                              | um00236   | 0.00236 | ni      | related to Intersectin 1                                                                  |
| 9c00034  | 0.03191 | ni     | hypothetical protein                                              | um10695   | 0.00237 | K03934  | probable NADH dehydrogenase                                                               |
| 7c00027  | 0.03191 | ni     | translocase of outer mitochondrial membrane complex, subunit T    | um04991   | 0.00238 | K08286  | related to Serine                                                                         |
| 22c00053 | 0.03192 | K03134 | transcription initiation factor TFIID, subunit TAF10              | um11790   | 0.00239 | K16536  | related to Hook protein                                                                   |
| 7c00006  | 0.03192 | ni     | hypothetical protein                                              | um01208   | 0.0024  | K04043  | probable SSC1 - mitochondrial HSP70 member                                                |
| 3c00047  | 0.032   | K10873 | DNA repair and recombination protein RADS2/RAD22                  | um02428   | 0.00242 | ni      | hypothetical protein                                                                      |
| 22c00265 | 0.03243 | ni     | Na+/H+ antiporter                                                 | um10041.2 | 0.00242 | ni      | conserved hypothetical protein                                                            |
| 18c00083 | 0.03256 | K10740 | hypothetical protein                                              | um03025   | 0.00244 | K08735  | probable DNA mismatch repair protein MSH2                                                 |
| 15c00045 | 0.03273 | ni     | hypothetical protein                                              | um03649   | 0.00244 | ni      | hypothetical protein                                                                      |
| 9c00340  | 0.03276 | K00999 | phosphatidylesterase                                              | um01037   | 0.00245 | K01808  | probable ribose-5-phosphate isomerase                                                     |
| 9c00109  | 0.03283 | K00140 | methylmalonate semialdehyde dehydrogenase                         | um04555   | 0.00245 | ni      | myosin V                                                                                  |
| 9c00172  | 0.03302 | K10771 | major apurinic/apyrimidinic endonuclease                          | um02611   | 0.00246 | K01166  | related to ribonuclease M                                                                 |
| 18c00046 | 0.03304 | ni     | hypothetical protein                                              | um10611   | 0.00247 | K12625  | probable U6 snRNA-associated Sm-like protein LSM6                                         |
| 84c00063 | 0.03308 | ni     | asparaginase synthase                                             | um11873   | 0.00247 | ni      | hypothetical protein                                                                      |
| 5c00012  | 0.03314 | ni     | branched chain alpha-keto acid dehydrogenase E1, beta subunit     | um03436   | 0.00249 | ni      | related to triacylglycerol lipase                                                         |
| 11c00026 | 0.03324 | ni     | beta-glucosyltransferase                                          | um10289   | 0.00252 | ni      | hypothetical protein                                                                      |
| 16c00022 | 0.03338 | K00698 | chitin synthase/hyaluronan synthase                               | um11483   | 0.00252 | K00573  | probable Isoaspartyl protein carboxyl methyltransferase                                   |
| 13c00062 | 0.03342 | ni     | hypothetical protein                                              | um03234.2 | 0.00252 | K06631  | related to CDC5 - Serine                                                                  |
| 12c00066 | 0.03353 | ni     | hypothetical protein                                              | um01721   | 0.00253 | ni      | conserved hypothetical protein                                                            |
| 22c00242 | 0.03358 | K00540 | dehydrogenases with different specificities                       | um10521   | 0.00256 | ni      | ni                                                                                        |
| 10c00090 | 0.03369 | K03885 | NADH-dehydrogenase                                                | um00124   | 0.00256 | ni      | hypothetical protein                                                                      |
| 9c00196  | 0.0337  | K09831 | cytochrome P450 CYP4/CYP19/CYP26 subfamilies                      | um05988   | 0.00259 | ni      | conserved hypothetical protein                                                            |
| 20c00064 | 0.03389 | ni     | hypothetical protein                                              | um05138   | 0.0026  | ni      | conserved hypothetical protein                                                            |
| 9c00350  | 0.03391 | ni     | uncharacterized conserved protein                                 | um01084   | 0.00261 | K01178  | related to Glucosylase precursor                                                          |
| 25c00044 | 0.03392 | ni     | hypothetical protein                                              | um03945   | 0.00262 | K15628  | probable peroxisomal half ABC transporter                                                 |
| 22c00233 | 0.03393 | ni     | NADH-dehydrogenase                                                | um11731   | 0.00262 | ni      | related to nadh-ubiquinone oxidoreductase 9                                               |
| 22c00006 | 0.03396 | K01764 | holocytochrome c synthase                                         | um11164   | 0.00262 | ni      | conserved hypothetical protein                                                            |
| 2c00040  | 0.03402 | ni     | hypothetical protein                                              | um00262   | 0.00262 | ni      | conserved hypothetical protein                                                            |
| 22c00288 | 0.03413 | ni     | hypothetical protein                                              | um05787   | 0.00263 | ni      | conserved hypothetical protein                                                            |
| 7c00098  | 0.03446 | K00228 | coproporphyrinogen III oxidase CPO/HEM13                          | um03910   | 0.00263 | K02183  | probable Calmodulin                                                                       |
| 20c00067 | 0.03448 | K11314 | GTPase Rab2                                                       | um02220   | 0.00264 | K03515  | related to DNA repair protein MUS-42                                                      |
| 9c00303  | 0.0345  | K11518 | translocase of outer mitochondrial membrane complex, subunit T    | um04786   | 0.00265 | K03032  | probable RPN2 - 26S proteasome regulatory subunit                                         |
| 7c00033  | 0.0346  | K08817 | synaptobrevin clamp-like protein SEC22                            | um02778   | 0.00265 | ni      | related to GCY1 - galactose-induced protein of aldo                                       |
| 4c00022  | 0.0346  | ni     | lipoyltransferase                                                 | um03256   | 0.00267 | K03574  | conserved hypothetical protein                                                            |
| 13c00089 | 0.03463 | K02537 | spindle assembly checkpoint protein                               | um05275   | 0.00267 | K00898  | related to pyruvate dehydrogenase kinase isoform 2                                        |
| 7400024  | 0.03464 | K11505 | mitochondrial aspartate/glutamate carrier protein Aralar/Citrin   | um02040   | 0.00267 | ni      | conserved hypothetical protein                                                            |
| 7c00335  | 0.03479 | K14679 | hypothetical protein                                              | um01014   | 0.00268 | ni      | related to SOT1 - glycerol 3-phosphate                                                    |
| 16c00006 | 0.03476 | K01607 | hypothetical protein                                              | um10196   | 0.00272 | K15151  | conserved hypothetical protein                                                            |
| 13c00015 | 0.0349  | ni     | hypothetical protein                                              | um05889   | 0.00272 | K03320  | high affinity ammonium transporter                                                        |
| 9c00033  | 0.03492 | K00809 | deoxyhypusine synthase                                            | um01282   | 0.00274 | K008052 | related to neurofibromin                                                                  |
| 12c00121 | 0.03499 | ni     | hypothetical protein                                              | um02887   | 0.00275 | ni      | conserved hypothetical protein                                                            |
| 8c00114  | 0.03503 | K01068 | acyl-coa thioesterase                                             | um00442   | 0.00276 | ni      | hypothetical protein                                                                      |
| 9c00032  | 0.03506 | ni     | amidases                                                          | um11394   | 0.00277 | ni      | conserved hypothetical protein                                                            |
| 25c00036 | 0.03508 | K00365 | uricase                                                           | um15049   | 0.00277 | ni      | related to PUF3 - transcript-specific regulator of mRNA degradation                       |
| 19c00059 | 0.03515 | ni     | heme A farnesyltransferase                                        | um10131   | 0.00277 | K01613  | related to phosphatidylserine decarboxylase proenzyme 2 precursor                         |
| 7c00023  | 0.03516 | ni     | Cyclin-dependent tyrosine-binding protein CLB1                    | um04068   | 0.00278 | ni      | hypothetical protein                                                                      |
| 7400250  | 0.03533 | K08675 | mitochondrial ATP-dependent protease PIM1/LON                     | um02363   | 0.00281 | ni      | related to protein                                                                        |
| 74c00025 | 0.03533 | K13525 | AAA-type ATPase                                                   | um05072   | 0.00282 | ni      | conserved hypothetical protein                                                            |
| 26c00025 | 0.03535 | K00604 | methionyl-tRNA formyltransferase                                  | um03210   | 0.00282 | K02219  | probable CKS1 - cyclin-dependent kinases regulatory subunit                               |
| 13c00085 | 0.03544 | ni     | hypothetical protein                                              | um11621   | 0.00282 | K02936  | probable RPLB8 - 60s large subunit ribosomal protein L7a                                  |
| 14c00035 | 0.03544 | ni     | serine/threonine-specific protein phosphatase PP1, catalytic subu | um01082   | 0.00285 | K03809  | probable 1                                                                                |
| 7c00021  | 0.03556 | ni     | serine/threonine protein kinase                                   | um10622   | 0.00285 | ni      | hypothetical protein                                                                      |
| 7400044  | 0.03568 | ni     | polynucleotide kinase 3' phosphatase                              | um00386   | 0.00286 | ni      | conserved hypothetical protein                                                            |
| 25c00029 | 0.03595 | ni     | hypothetical protein                                              | um03166   | 0.00287 | ni      | hypothetical protein                                                                      |
| 2c00062  | 0.03597 | ni     | putative N2                                                       | um04481   | 0.00289 | ni      | related to ADH2 - Alcohol dehydrogenase II                                                |
| 12c00075 | 0.03612 | ni     | sucrose transporter and related proteins                          | um10248   | 0.00293 | ni      | conserved hypothetical protein                                                            |
| 20c00010 | 0.03624 | K02948 | hypothetical protein                                              | um00789   | 0.00295 | K00624  | probable carnitine O-acetyltransferase                                                    |
| 7400304  | 0.03636 | ni     | tuberin - Rap/ran-GTPase-activating protein                       | um10528   | 0.00297 | K05688  | related to STE6 - ABC transporter                                                         |
| 19c00081 | 0.03641 | ni     | hypothetical protein                                              | um10788.2 | 0.00301 | K13721  | probable AAP1 - alanine                                                                   |
| 15c00011 | 0.03691 | ni     | pentafunctional AROM protein                                      | um11504   | 0.00304 | ni      | putative protein                                                                          |
| 12c00042 | 0.03713 | K03360 | leucine rich repeat proteins                                      | um00448   | 0.00305 | ni      | ni                                                                                        |
| 7400180  | 0.03713 | K11786 | chromatin remodeling complex SWI/SNF, component SWI2              | um03373   | 0.00305 | ni      | ni                                                                                        |
| 10c00005 | 0.03719 | K07555 | mitochondrial F1-ATPase assembly protein                          | um05900   | 0.00307 | K11434  | probable HMT1 - hnRNP arginine N-methyltransferase                                        |
| 22c00069 | 0.03727 | ni     | hypothetical protein                                              | um00043   | 0.00307 | ni      | conserved hypothetical protein                                                            |
| 9c00347  | 0.03751 | K12373 | beta-n-acetylthiosaminidase                                       | um01730   | 0.00308 | ni      | conserved hypothetical protein                                                            |
| 9c00049  | 0.03772 | ni     | vacuolar H+-ATPase V1 sector, subunit F                           | um01004   | 0.00308 | ni      | conserved hypothetical protein                                                            |
| 6c00120  | 0.03786 | K02151 | hypothetical protein                                              | um00219   | 0.00308 | K15122  | conserved hypothetical protein                                                            |
| 13c00019 | 0.03802 | ni     | hypothetical protein                                              | um10466.2 | 0.00311 | K00772  | related to MIEU1 - multiple enhancer of UAS2                                              |
| 22c00018 | 0.03815 | ni     | yeast GTPase activating protein                                   | um01122   | 0.00312 | ni      | related to Hc51 - DNA helicase A                                                          |
| 27c00042 | 0.03818 | K00509 | hypothetical protein                                              | um05687   | 0.00317 | K02725  | probable PRE5 - 20S proteasome subunit 3                                                  |
| 24c00027 | 0.03822 | ni     | hypothetical protein                                              | um00245.2 | 0.00318 | ni      | related to mitochondrial uncoupling protein 3                                             |
| 5c00086  | 0.03837 | K07870 | predicted Ras related Rac-GTP binding protein                     | um01679   | 0.00332 | K02541  | probable MCM3 - subunit of pre-replication complex                                        |
| 25c00022 | 0.03865 | ni     | hypothetical protein                                              | um02665   | 0.00332 | K10863  | conserved hypothetical protein                                                            |
| 8c00102  | 0.03847 | ni     | hypothetical protein                                              | um10469   | 0.00332 | K02989  | probable 40S ribosomal protein S5                                                         |
| 9c00436  | 0.03849 | ni     | synaptic vesicle transporter SVOP and related transporters        | um11783   | 0.00322 | K10990  | conserved hypothetical protein                                                            |
| 5c00106  | 0.03859 | K01412 | mitochondrial processing peptidase, alpha subunit                 | um11797   | 0.00322 | K06126  | related to Ubiquinone biosynthesis protein COQ6 and COQ7                                  |
| 9c00142  | 0.03864 | K14805 | RNA helicase                                                      | um01969   | 0.00324 | ni      | putative protein                                                                          |
| 8c00332  | 0.03866 | ni     | hypothetical protein                                              | um00783   | 0.00327 | ni      | hypothetical protein                                                                      |
| 8c00109  | 0.03867 | ni     | hypothetical protein                                              | um01671   | 0.00329 | ni      | related to YSC84 - protein involved in the organization of actin cytoskeleton             |
| 20c00072 | 0.03891 | K01702 | 3-isopropylmalate dehydratase                                     | um06474   | 0.0033  | ni      | conserved hypothetical protein                                                            |
| 25c00030 | 0.03899 | ni     | iron/sulfur family oxidoreductases                                | um12030   | 0.0033  | ni      | putative protein                                                                          |
| 26c00024 | 0.03904 | ni     | hypothetical protein                                              | um04203   | 0.0033  | K03975  | RhoG GTP binding protein                                                                  |
| 18c00095 | 0.03914 | K01655 | alpha-isopropylmalate synthase/homocitrate synthase               | um11010   | 0.00331 | ni      | conserved hypothetical protein                                                            |
| 2c00043  | 0.03918 | K14439 | SNF2 family DNA-dependent ATPase                                  | um05559   | 0.00332 | K03262  | probable TIF5 - translation initiation factor eIF5                                        |
| 27c00030 | 0.03939 | ni     | predicted mechanosensitive ion channel                            | um02213   | 0.00333 | ni      | conserved hypothetical protein                                                            |
| 7400286  | 0.03941 | ni     | hypothetical protein                                              | um11892   | 0.00335 | K06655  | probable PHO85 - cyclin-dependent protein kinase                                          |
| 6c00063  | 0.03955 | ni     | hypothetical protein                                              | um03818   | 0.00336 | ni      | conserved hypothetical protein                                                            |
| 14c00118 | 0.03969 | ni     | FOG, Predicted E3 ubiquitin ligase                                | um15040   | 0.0034  | K01887  | probable arginyl-tRNA synthetase                                                          |
| 14c00002 | 0.0397  | ni     | hypothetical protein                                              | um03513   | 0.00341 | ni      | conserved hypothetical protein                                                            |
| 9c00415  | 0.03996 | ni     | hypothetical protein                                              | um01062   | 0.00344 | K15356  | probable VRG4 - Golgi GDP-mannose transporter                                             |
| 12c00109 | 0.03920 | K09104 | helix loop helix transcription factor EB                          | um10520   | 0.00346 | K13298  | related to HcE2 - Oligonucleoside                                                         |
| 2c00075  | 0.04    | K11304 | histone acetyltransferase                                         | um10038   | 0.00347 | K14729  | probable multifunctional beta-oxidation protein                                           |
| 22c00091 | 0.04001 | ni     | uncharacterized conserved protein                                 | um01194   | 0.00348 | ni      | putative protein                                                                          |
| 7c00083  | 0.04007 | ni     | hypothetical protein                                              | um00578   | 0.00349 | ni      | putative protein                                                                          |
| 18c00082 | 0.04018 | K02149 | vacuolar H+-ATPase V1 sector, subunit D                           | um00827   | 0.00353 | ni      | hypothetical protein                                                                      |
| 16c00014 | 0.04033 | K01253 | sialic acid hydrolase                                             | um01781   | 0.00354 | ni      | conserved hypothetical protein                                                            |
| 22c00138 | 0.04044 | K02564 | glucosamine-6-phosphate isomerase                                 | um02950   | 0.00356 | ni      | putative protein                                                                          |
| 9c00249  | 0.04046 | ni     | multidrug resistance-associated protein                           | um04270   | 0.00356 | K01876  | probable DPS1 - aspartyl-tRNA synthetase                                                  |
| 3c00084  | 0.04077 | ni     | hypothetical protein                                              | um05333   | 0.00357 | K14530  | putative protein                                                                          |
| 9c00012  | 0.04094 | ni     | hypothetical protein                                              | um04294   | 0.00356 | K09140  |                                                                                           |

|          |         |        |                                                                     |           |         |        |                                                                          |
|----------|---------|--------|---------------------------------------------------------------------|-----------|---------|--------|--------------------------------------------------------------------------|
| 14d00067 | 0.0432  | K15083 | nucleotide excision repair protein RAD16                            | um02114   | 0.00393 | ni     | conserved hypothetical protein                                           |
| 18d00020 | 0.04324 | ni     | hypothetical protein                                                | um05206   | 0.00396 | ni     | ni                                                                       |
| 25c0010  | 0.04341 | K01074 | palmitoyl protein thioesterase                                      | um10871   | 0.00396 | K09966 | conserved hypothetical protein                                           |
| 12c00125 | 0.04384 | ni     | hypothetical protein                                                | um00072   | 0.00397 | ni     | conserved hypothetical protein                                           |
| 4d00013  | 0.04358 | ni     | recombination signal binding protein-J kappa                        | um12204   | 0.00398 | ni     | putative protein                                                         |
| 9c00114  | 0.04359 | ni     | hypothetical protein                                                | um11339   | 0.00402 | ni     | related to Siderophore iron transporter 3                                |
| 9c00410  | 0.04373 | ni     | hypothetical protein                                                | um01051   | 0.00403 | ni     | related to mls-mulidrug-resistance transporter                           |
| 14d00007 | 0.04384 | ni     | hypothetical protein                                                | um11087   | 0.00404 | K02216 | related to checkpoint kinase chk1                                        |
| 11c00079 | 0.04387 | K00164 | 2-oxoglutarate dehydrogenase, E1 subunit                            | um05410   | 0.00407 | K15178 | conserved hypothetical protein                                           |
| 25d00041 | 0.0439  | K14567 | uncharacterized conserved protein                                   | um02694   | 0.00407 | ni     | conserved hypothetical protein                                           |
| 9c00194  | 0.04401 | ni     | methyltransferases                                                  | um02396   | 0.00408 | ni     | conserved hypothetical protein                                           |
| 3d00083  | 0.04425 | ni     | ras GTP-activating protein                                          | um04726   | 0.00411 | K01923 | activator ADE1 - phosphoribosylamidimidazole-succinocarboxamide synthase |
| 22c00191 | 0.04424 | ni     | hypothetical protein                                                | um05398.2 | 0.00414 | ni     | putative protein                                                         |
| 18d00086 | 0.0446  | ni     | hypothetical protein                                                | um01558   | 0.00414 | ni     | hypothetical protein                                                     |
| 8c00038  | 0.04504 | ni     | hypothetical protein                                                | um01623   | 0.00416 | ni     | ni                                                                       |
| 13c00013 | 0.04507 | ni     | predicted transporter                                               | um02655   | 0.00417 | ni     | related to RNA binding motif protein                                     |
| 15c00053 | 0.04509 | ni     | hypothetical protein                                                | um04497   | 0.00417 | K01755 | probable ARG4 - arginosuccinate lyase                                    |
| 12c00110 | 0.04515 | K03263 | translation initiation factor 5A                                    | um02586   | 0.00418 | ni     | related to clef lip and palate transmembrane protein 1                   |
| 9c00305  | 0.04521 | K00006 | glycerol-3-phosphate dehydrogenase                                  | um03200   | 0.00418 | K08775 | Rad51-associated protein Bhr2                                            |
| 18d00070 | 0.04527 | K04728 | protein kinase ATM/Trf1                                             | um06346   | 0.00421 | ni     | conserved hypothetical protein                                           |
| 22c00118 | 0.04533 | ni     | hypothetical protein                                                | um12218   | 0.00422 | K06636 | probable SMC1 - chromosome segregation protein                           |
| 24d00025 | 0.04547 | K03178 | ubiquitin activating enzyme UBA1                                    | um12280   | 0.00424 | ni     | conserved hypothetical protein                                           |
| 18d00093 | 0.04557 | ni     | predicted small molecule transporter                                | um04190   | 0.00424 | ni     | conserved hypothetical protein                                           |
| 9c00094  | 0.04578 | K11292 | transcription elongation factor SPT6                                | um10396.2 | 0.00425 | K10848 | related to RAD1 - component of the nucleotide excision repairosome       |
| 9c00079  | 0.04597 | ni     | hypothetical protein                                                | um04772   | 0.00426 | ni     | hypothetical protein                                                     |
| 12c00013 | 0.046   | ni     | cofactor of Mda Rho GTPase                                          | um06167   | 0.00428 | K07095 | related to VPS29 - involved in vacuolar protein sorting                  |
| 27d00055 | 0.04611 | ni     | mitochondrial import inner membrane translocase, subunit TIM44      | um05184   | 0.00429 | ni     | conserved hypothetical protein                                           |
| 21d00004 | 0.04619 | ni     | hypothetical protein                                                | um03166   | 0.00433 | ni     | related to DCR2 - dosage-dependent cell cycle regulator                  |
| 16d00002 | 0.04621 | ni     | hypothetical protein                                                | um05300   | 0.00435 | ni     | conserved hypothetical Ustilago-specific protein                         |
| 6d00124  | 0.04648 | K14408 | mRNA cleavage and polyadenylation factor I complex, subunit R1      | um10893   | 0.00435 | ni     | conserved hypothetical protein                                           |
| 28d00084 | 0.04656 | K02148 | vacuolar H <sup>+</sup> -ATPase V1 sector, subunit C                | um06181   | 0.00436 | K00031 | probable IPF2 - isocitrate dehydrogenase                                 |
| 10d00079 | 0.04667 | K01802 | cyclophilin type peptidyl-prolyl cis-trans isomerase                | um05341   | 0.00438 | ni     | hypothetical protein                                                     |
| 10d00074 | 0.04696 | K12854 | RNA helicase BRR2                                                   | um02285   | 0.00438 | ni     | related to Na                                                            |
| 9c00015  | 0.04705 | ni     | hypothetical protein                                                | um00869   | 0.00443 | ni     | conserved hypothetical protein                                           |
| 25c0006  | 0.04717 | K03522 | electronic transfer flavoprotein, alpha subunit                     | um06717   | 0.00443 | K01809 | probable Pfl00 - menaenase-6-phosphate isomerase                         |
| 9c00035  | 0.04733 | ni     | predicted small molecule transporter                                | um15001   | 0.00445 | K16369 | related to CHO2 - phosphatidylethanolamine N-methyltransferase           |
| 22c00186 | 0.04745 | ni     | hypothetical protein                                                | um10953   | 0.00447 | K03671 | probable TRX2 - thioredoxin II                                           |
| 10c00062 | 0.04754 | ni     | hypothetical protein                                                | um05908   | 0.00451 | ni     | conserved hypothetical protein                                           |
| 5c00007  | 0.04785 | ni     | hypothetical protein                                                | um06285   | 0.00452 | K01956 | related to carbamoyl-phosphate synthase small chain                      |
| 4d00023  | 0.04788 | ni     | dual-specificity tyrosine-phosphorylation regulated kinase          | um00721   | 0.00453 | ni     | related to MAPKK kinase                                                  |
| 3c00037  | 0.04802 | K08869 | predicted unusual protein kinase                                    | um11210   | 0.00453 | K00031 | probable IDP1 - isocitrate dehydrogenase                                 |
| 7c00229  | 0.04803 | ni     | golgi reassembly stacking protein GRASP65                           | um10659   | 0.00455 | K00814 | probable ait1 - alanine aminotransferase                                 |
| 12c00141 | 0.0483  | K12572 | poly(A) ribonuclease subunit                                        | um00706   | 0.00456 | ni     | hypothetical protein                                                     |
| 18c00079 | 0.04848 | K01807 | vacuolar H <sup>+</sup> -ATPase V1 sector, subunit C                | um02825   | 0.00456 | ni     | putative protein                                                         |
| 24c00005 | 0.04863 | K01599 | uroporphyrinogen decarboxylase                                      | um05925   | 0.00457 | ni     | related to TOK1 - Voltage-gated                                          |
| 18d00070 | 0.04869 | ni     | hypothetical protein                                                | um10446   | 0.00458 | ni     | putative protein                                                         |
| 7c00051  | 0.04872 | K06126 | monooxygenase                                                       | um03487   | 0.00466 | ni     | putative protein                                                         |
| 9d00150  | 0.04875 | ni     | hypothetical protein                                                | um02592   | 0.00479 | ni     | conserved hypothetical protein                                           |
| 9c00261  | 0.04877 | ni     | FOG, WD40 repeat                                                    | um02903   | 0.00482 | K03022 | related to RPC25 - DNA-directed RNA polymerase III                       |
| 7c00276  | 0.04889 | K03678 | exosomal 3'-5' exonuclease complex, subunit Rpl45                   | um03278   | 0.00486 | K15620 | probable VPS74 - protein involved in protein-vacuolar targeting          |
| 10c00083 | 0.04895 | ni     | predicted phospholipase                                             | um02465   | 0.00488 | ni     | 0.00488 ni                                                               |
| 19d00089 | 0.04896 | K11650 | SWI/SNF transcription activation complex subunit                    | um11054   | 0.00489 | K09568 | probable FPR1 - peptidyl-prolyl cis-trans isomerase                      |
| 5d00073  | 0.04912 | ni     | uncharacterized conserved protein                                   | um06103   | 0.00493 | K01507 | probable RPH1 - inorganic pyrophosphatase                                |
| 12c00045 | 0.04913 | K11885 | DNA damage inducible protein                                        | um02905   | 0.00504 | K03028 | probable RPN1 - 26S proteasome regulatory subunit                        |
| 9c00294  | 0.04951 | ni     | WD40 repeat-containing protein                                      | um04076   | 0.00505 | ni     | ni                                                                       |
| 7c00090  | 0.04983 | ni     | hypothetical protein                                                | um04427   | 0.00507 | ni     | hypothetical protein                                                     |
| 7c00034  | 0.04991 | ni     | hypothetical protein                                                | um11363   | 0.00507 | K00793 | related to RIB5 - riboflavin synthase                                    |
| 14d00051 | 0.04994 | ni     | hypothetical protein                                                | um06543   | 0.00509 | K08638 | Ste20-like kinase Dor3                                                   |
| 20d00020 | 0.04995 | K00888 | phosphatidylinositol 4-kinase                                       | um11800   | 0.00509 | ni     | probable heat shock protein Hsp88                                        |
| 9c00195  | 0.04996 | ni     | hypothetical protein                                                | um01831   | 0.00511 | ni     | conserved hypothetical protein                                           |
| 8d00098  | 0.04997 | K11684 | transcription initiation factor TFIID, subunit BDF1 and related bro | um10239   | 0.00512 | K12897 | related to Transformer-2 protein                                         |
| 5c00281  | 0.05001 | ni     | FOG, Leucine rich repeat                                            | um06205   | 0.00514 | ni     | related to                                                               |
| 16d00009 | 0.05005 | ni     | FOG, Zn-finger                                                      | um04305   | 0.00514 | ni     | probable AMS1 - alpha-mannosidase                                        |
| 5c00086  | 0.05008 | ni     | hypothetical protein                                                | um11458   | 0.00514 | ni     | related to trimethyllysine hydroxylase                                   |
| 25c00041 | 0.05009 | ni     | predicted membrane protein                                          | um10157   | 0.00516 | K01756 | probable adenylylsuccinate lyase                                         |
| 22c00152 | 0.0501  | ni     | hypothetical protein                                                | um04414   | 0.00517 | ni     | putative protein                                                         |
| 11d00011 | 0.05012 | K01733 | pyridoxal phosphate-dependent enzyme                                | um05835   | 0.00518 | K06674 | probable SMC2 - chromosome segregation protein                           |
| 9c00430  | 0.05019 | ni     | typtophan-rich basic nuclear protein                                | um05122   | 0.00525 | K08178 | related to carboxylic acid transport protein JEN1                        |
| 22d00276 | 0.0504  | ni     | predicted transporter                                               | um11353   | 0.00527 | K01900 | probable beta-succinyl CoA synthetase precursor                          |
| 15d00019 | 0.05054 | ni     | hypothetical protein                                                | um03521   | 0.00527 | ni     | putative protein                                                         |
| 5c00012  | 0.05057 | K10706 | rRNA-binding endonuclease positive effector                         | um02832   | 0.00528 | K02685 | related to PRI2 - DNA-directed DNA polymerase alpha                      |
| 9c00026  | 0.05068 | ni     | monohydroxycarboxylate/ferrodoxin reductase                         | um11823   | 0.00528 | ni     | hypothetical protein                                                     |
| 13d00025 | 0.05084 | K00418 | ubiquitin cytochrome c reductase, subunit QCR8                      | um00125   | 0.0053  | ni     | conserved hypothetical protein                                           |
| 7c00055  | 0.05097 | K03661 | vacuolar H <sup>+</sup> -ATPase V0 sector, subunit c"               | um15101   | 0.00533 | ni     | putative protein                                                         |
| 10c00008 | 0.05102 | K14312 | nuclear pore complex, Nup155 component c"                           | um02254   | 0.00538 | ni     | 0.00538 ni                                                               |
| 22d00088 | 0.05119 | ni     | hypothetical protein                                                | um04244   | 0.00538 | K17415 | conserved hypothetical protein                                           |
| 7d00090  | 0.05137 | ni     | hypothetical protein                                                | um00647   | 0.00538 | ni     | conserved hypothetical protein                                           |
| 22d00019 | 0.05152 | K07393 | predicted glutathione S-transferase                                 | um05160   | 0.00538 | K01870 | probable ILS1 - isoleucyl-tRNA synthetase                                |
| 22c00203 | 0.05153 | K01078 | lysosomal & prostatic acid phosphatases                             | um00211   | 0.00541 | K11557 | conserved hypothetical protein                                           |
| 9c00133  | 0.05171 | ni     | hypothetical protein                                                | um12126   | 0.00545 | ni     | putative protein                                                         |
| 9c00243  | 0.05177 | ni     | hypothetical protein                                                | um04688   | 0.00546 | ni     | conserved hypothetical protein                                           |
| 9c00243  | 0.05187 | ni     | hypothetical protein                                                | um11941   | 0.00547 | K12190 | related to VPS36 protein                                                 |
| 8c00023  | 0.0519  | K15455 | uncharacterized conserved protein                                   | um00026   | 0.00547 | K14826 | related to FK506-binding protein                                         |
| 22d00175 | 0.05192 | ni     | hypothetical protein                                                | um00361   | 0.0055  | ni     | conserved hypothetical protein                                           |
| 8c00038  | 0.05207 | K06110 | exonuclease subunit SEC6                                            | um01905   | 0.0055  | K05609 | probable ubiquitin thioesterase L3                                       |
| 10d00005 | 0.05217 | ni     | hypothetical protein                                                | um10797   | 0.00554 | K01103 | related to 6-phosphofructo-2-kinase                                      |
| 16c00011 | 0.05221 | ni     | FOG, TPR repeat                                                     | um04954.2 | 0.00554 | ni     | putative protein                                                         |
| 11c00063 | 0.05244 | ni     | phosphatidylinositol transfer protein PDR16 and related proteins    | um04171   | 0.00558 | ni     | related to ROT1 - molecular chaperone in the endoplasmic reticulum       |
| 5c00100  | 0.05251 | ni     | vacuolar sorting protein VPS1                                       | um02811   | 0.00558 | ni     | conserved hypothetical protein                                           |
| 10c00067 | 0.05257 | K08838 | serine/threonine protein kinase                                     | um03543   | 0.0056  | ni     | related to YNG2 - component of NuA4 histone acetyltransferase complex    |
| 5c00056  | 0.05303 | ni     | uncharacterized conserved protein                                   | um12009   | 0.00561 | ni     | conserved hypothetical protein                                           |
| 2d00025  | 0.05313 | ni     | hypothetical protein                                                | um04307   | 0.00564 | ni     | putative protein                                                         |
| 26d00004 | 0.05316 | K00987 | mRNA capping enzyme, guanlyltransferase                             | um06027.2 | 0.00567 | K01892 | probable HTS1 - histidine-tRNA ligase                                    |
| 13d00086 | 0.05323 | ni     | hypothetical protein                                                | um12050   | 0.00568 | K02138 | probable ATP7 - F1F0-ATPase complex                                      |
| 9c00148  | 0.05359 | ni     | fascilin and related adhesion glycoproteins                         | um02133   | 0.00568 | K15634 | conserved hypothetical protein                                           |
| 2d00011  | 0.05384 | K01869 | leucyl-tRNA synthetase                                              | um03081   | 0.00569 | K08853 | related to ARK1 - Actin Regulating Kinase                                |
| 12c00039 | 0.05389 | K06067 | histone deacetylase complex, catalytic component RPD3               | um06105   | 0.00567 | K00162 | probable PDB1 - pyruvate dehydrogenase                                   |
| 15d00039 | 0.05393 | K12637 | splicing factor U2AF, large subunit                                 | um02529   | 0.00575 | ni     | conserved hypothetical protein                                           |
| 9c00111  | 0.05412 | ni     | hypothetical protein                                                | um11359   | 0.00575 | ni     | related to BOR1 - boron efflux transporter                               |
| 11c00033 | 0.05432 | K11713 | protein geranylgeranyltransferase Type I, beta subunit              | um01597   | 0.00578 | ni     | hypothetical protein                                                     |
| 10d00107 | 0.05475 | ni     | golgi proteins involved in ER retention                             | um10088   | 0.00579 | K01907 | related to Acebaocetyl-CoA synthetase                                    |
| 20d00082 | 0.05485 | ni     | hypothetical protein                                                | um06497   | 0.00581 | ni     | putative protein                                                         |
| 7d00145  | 0.05488 | ni     | hypothetical protein                                                | um10656   | 0.00588 | K02684 | related to DNA primase 48K protein PR11                                  |
| 4d00045  | 0.05492 | ni     | hypothetical protein                                                | um05764   | 0.00588 | ni     | related to Malic acid transport protein                                  |
| 16d00006 | 0.05494 | ni     | PHD finger protein BR140/LIN-49                                     | um04193.2 | 0.0059  | K17053 | probable ABP140 - actin filament-binding protein                         |
| 11d00035 | 0.05507 | K11436 | protein arginine N-methyltransferase PRMT1 and related enzyme       | um01462   | 0.00593 | ni     | hypothetical protein                                                     |
| 12d00069 | 0.05514 | ni     | WD40 repeat-containing protein                                      | um11246   | 0.00597 | ni     | related to BZZ1 - Myc3                                                   |
| 9c00054  | 0.05518 | K12493 | predicted F1F0-ATPase-activating protein                            | um06002   | 0.00599 | ni     | hypothetical protein                                                     |
| 26c00011 | 0.05522 | K00927 | 3-phosphoglycerate kinase                                           | um01737.2 | 0.00599 | K07036 | related to Adiponectin receptor 1                                        |
| 22d00140 | 0.05529 | ni     | predicted lipase                                                    | um00526   | 0.00601 | K06883 | conserved hypothetical protein                                           |
| 7d00127  | 0.05558 | ni     | hypothetical protein                                                | um11957   | 0.00601 | ni     | related to histidine kinase                                              |
| 7d00052  | 0.05559 | K17408 | mitochondrial ribosome small subunit component                      | um00755   | 0.00603 | ni     | putative protein                                                         |
| 11d00065 | 0.05567 | ni     | hypothetical protein                                                | um01050   | 0.00604 | ni     | siderophore biosynthesis regulatory protein URBS1                        |
| 9c00139  | 0.05582 | ni     | glutaminyl cyclase                                                  | um11238   | 0.00606 | ni     | conserved hypothetical protein                                           |
| 22d00249 | 0.056   | K03441 | aquaporin                                                           | um02929   | 0.00608 | K04709 | related to longevity-assurance protein LAG1                              |
| 2c00040  | 0.05601 | ni     | flavin-containing monooxygenase                                     | um11712   | 0.0061  | ni     | putative protein                                                         |
| 9c00102  | 0.05605 | ni     | acetylcholinesterase                                                | um02843   | 0.00614 | K01341 | probable KEX2 - endoprotease of late golgi compartment                   |
| 2c00052  | 0.05619 | ni     | hypothetical protein                                                | um04406   | 0.00625 | K00586 | probable DPH5 - diphthamide methyltransferase                            |
| 5c00057  | 0.05624 | ni     | hypothetical protein                                                | um02425   | 0.00626 | K12581 | probable CCR4-NOT transcription complex                                  |
| 22c00254 | 0.05627 | ni     | synaptic vesicle transporter SVOP and related transporters          | um11161   | 0.00626 | K00026 | probable MDH11 - malate dehydrogenase precursor                          |
| 10c00063 | 0.05632 | K00463 | exosomal 3'-5' exonuclease complex, subunit Rpl44/DiS3              | um04851   | 0.00627 | K03564 | conserved hypothetical protein                                           |
| 7d00066  | 0.05649 | ni     | vacuolar sorting protein VPS45/Stt10                                | um06018.2 | 0.00632 | ni     | conserved hypothetical protein                                           |
| 14c00031 | 0.05657 | K00288 | C1-tetrahydrofolate synthase                                        | um00078   | 0.00635 | ni     | phenylalanine ammonia-lyase                                              |
| 9c000250 | 0.05664 | ni     | hypothetical protein                                                | um03165   | 0.00636 | ni     | ni                                                                       |
| 7c00014  | 0.05679 | K12761 | serine/threonine protein kinase                                     | um15047   | 0.00638 | ni     | probable VPS1 - member of the dynamin family of GTPases                  |
| 10c00084 | 0.05667 | ni     | hypothetical protein                                                | um02046   | 0.00644 | K02728 | probable PRE9 - 20S proteasome subunit Y13                               |
| 18d00064 | 0.05669 | K12815 | mRNA splicing factor ATP-dependent RNA helicase                     | um11084.2 | 0.00644 | K05012 | probable voltage-gated chloride channel                                  |
| 10c00034 | 0.05691 | ni     | hypothetical protein                                                | um00833   | 0.00649 | K03066 | probable RPT6 - 26S proteasome regulatory subunit                        |
| 3c00014  | 0.05694 | ni     | hypothetical protein                                                | um10493   | 0.00655 | ni     | related to aminopeptidase                                                |
| 7d00156  | 0.05697 | ni     | uncharacterized conserved protein                                   | um04194   | 0.00656 | K13120 | conserved hypothetical protein                                           |
| 26d00026 | 0.05708 | ni     | uncharacterized conserved protein                                   | um00481   | 0.00657 | K13280 | probable signal peptidase                                                |
| 18c00008 | 0.05708 | ni     | uncharacterized conserved protein                                   | um04740   | 0.00661 | ni     | conserved hypothetical protein                                           |
| 22d0169  | 0.05715 | ni     | hypothetical protein                                                | um04191   | 0.00661 | K13338 | probable PEX1 - peroxis                                                  |

|          |         |        |                                                                        |           |         |        |                                                                                     |
|----------|---------|--------|------------------------------------------------------------------------|-----------|---------|--------|-------------------------------------------------------------------------------------|
| 27d00064 | 0.05905 | ni     | flavohemoprotein b5+b5R                                                | um01293   | 0.0071  | K03510 | related to DNA Polymerase Iota                                                      |
| 12d20137 | 0.05919 | K10908 | mitochondrial/chloroplast DNA-directed RNA polymerase RPO41            | um01184   | 0.00711 | K03020 | related to Rpo19 - DNA-directed RNA polymerases I and III                           |
| 16d00060 | 0.05923 | K03262 | translational initiation factor 5                                      | um03789   | 0.00711 | ni     | putative protein                                                                    |
| 9c000339 | 0.05924 | ni     | hypothetical protein                                                   | um10620   | 0.00714 | K03132 | related to TAF7 - TFIID subunit                                                     |
| 8a00013  | 0.05935 | ni     | hypothetical protein                                                   | um11349   | 0.0072  | ni     | conserved hypothetical protein                                                      |
| 9c000290 | 0.05938 | K03505 | hypothetical protein                                                   | um10940   | 0.00721 | ni     | related to ROT1 - molecular chaperone in the endoplasmic reticulum                  |
| 14c00007 | 0.05939 | K14550 | uncharacterized conserved protein                                      | um04329.2 | 0.00721 | ni     | conserved hypothetical protein                                                      |
| 16d00063 | 0.05959 | ni     | global brain transcript regulator                                      | um00721   | K00327  | ni     | probable NAD(P)-cytochrome P450 reductase                                           |
| 25c00033 | 0.05976 | K12272 | signal recognition particle receptor, beta subunit                     | um05104   | 0.00723 | ni     | putative protein                                                                    |
| 5c000084 | 0.05986 | K14962 | histone H3 (Lys4) methyltransferase complex and RNA cleavage           | um00883   | 0.00726 | ni     | related to KCS1 - potential transcription factor of the BZIP type                   |
| 12d00059 | 0.05988 | ni     | uncharacterized conserved protein                                      | um01048   | 0.0073  | K01581 | ornithine decarboxylase                                                             |
| 9a000342 | 0.05993 | K07573 | ori23-3' 5' ori23-nucleosome complex, subunit sk4                      | um02142   | 0.00731 | ni     | related to musc2142                                                                 |
| 1c00028  | 0.05996 | ni     | uncharacterized conserved protein, AMMECR1                             | um02976.2 | 0.00737 | ni     | conserved hypothetical protein                                                      |
| 27d00052 | 0.06011 | K12571 | PAB-dependent poly(A) ribonuclease, subunit PAN2                       | um10524   | 0.00743 | K03260 | related to TIF4631 - mRNA cap-binding protein                                       |
| 6c00034  | 0.06016 | ni     | hypothetical protein                                                   | um12297   | 0.00744 | ni     | conserved hypothetical protein                                                      |
| 7c00216  | 0.06035 | K00022 | 3-hydroxyacyl-CoA dehydrogenase                                        | um00081   | 0.00745 | ni     | putative protein                                                                    |
| 19d00117 | 0.06056 | ni     | vascular sorting protein VPS1                                          | um03496   | 0.00749 | K02213 | related to Cell division control protein 18                                         |
| 18c00069 | 0.06057 | K11559 | hypothetical protein                                                   | um00297   | 0.00753 | K13345 | related to Peroxisome assembly protein 12                                           |
| 8a000083 | 0.06063 | K01537 | calcium transporting ATPase                                            | um03597   | 0.00755 | ni     | conserved hypothetical protein                                                      |
| 4c00015  | 0.06072 | ni     | predicted hydrolases or acyltransferases                               | um03853   | 0.00759 | K14312 | related to NUP170 - nuclear pore protein                                            |
| 15c00017 | 0.06123 | ni     | hypothetical protein                                                   | um05399   | 0.00761 | ni     | hypothetical protein                                                                |
| 19d00047 | 0.06129 | ni     | hypothetical protein                                                   | um02542   | 0.00761 | ni     | hypothetical protein                                                                |
| 12c00027 | 0.06131 | ni     | hypothetical protein                                                   | um11769   | 0.00764 | K12812 | probable SUB2 - mRNA export protein                                                 |
| 6c00129  | 0.06152 | ni     | hypothetical protein                                                   | um11263   | 0.00764 | ni     | putative protein                                                                    |
| 3a000067 | 0.06152 | ni     | hypothetical protein                                                   | um00083   | 0.00765 | K02598 | related to formate                                                                  |
| 24c00016 | 0.06162 | K01809 | adenosine-5-phosphate isomerase                                        | um05692   | 0.0077  | ni     | hypothetical protein                                                                |
| 22d00231 | 0.06169 | K15151 | transcription factor, subunit of SRB subcomplex of RNA polymerase      | um10515   | 0.0077  | ni     | conserved hypothetical protein                                                      |
| 7a00219  | 0.06169 | ni     | exocyst protein Sec3                                                   | um02763   | 0.00774 | ni     | conserved hypothetical protein                                                      |
| 22d00072 | 0.06186 | ni     | GPI transamidase complex, GPI17/PIG-S component                        | um04542   | 0.00777 | K10577 | probable ubiquitin-protein ligase hus5                                              |
| 22d00012 | 0.06191 | K14835 | RNA and RNA cytosine-C5-methylase                                      | um02154   | 0.00784 | ni     | related to amino-acid permease 2                                                    |
| 25d00077 | 0.06193 | ni     | ATP-dependent RNA helicase A                                           | um04914   | 0.00784 | K11271 | conserved hypothetical protein                                                      |
| 9c00250  | 0.06199 | ni     | ubiquitin-conjugating enzyme-related protein F11                       | um11588   | 0.00794 | K14686 | related to copper transport protein                                                 |
| 22d00272 | 0.06205 | K02350 | DNA polymerase zeta, catalytic subunit                                 | um06040   | 0.00795 | ni     | conserved hypothetical protein                                                      |
| 26d00044 | 0.0621  | K14823 | nucleoid protein-like/EbNA1-binding protein                            | um10980   | 0.00798 | ni     | conserved hypothetical Ustilago-specific protein                                    |
| 7c00190  | 0.06221 | K14556 | WD40-repeat-containing subunit of the 18S rRNA processing complex      | um02024   | 0.00801 | K03327 | related to E3                                                                       |
| 1c00027  | 0.06224 | ni     | GTPase Rab5/YPT51                                                      | um01445.2 | 0.00804 | K02540 | probable DNA replication licensing factor                                           |
| 25c00036 | 0.06236 | K07565 | ribosome biogenesis protein NIP7                                       | um04268   | 0.00805 | K00290 | probable saccharopine hydroxylase                                                   |
| 16c00065 | 0.0624  | K00729 | hypothetical protein                                                   | um11427   | 0.00808 | K12868 | related to SYF2 - pre-mRNA-splicing factor                                          |
| 12c00058 | 0.06242 | K15423 | serine/threonine specific protein phosphatase                          | um00549   | 0.00809 | ni     | related to UTR1                                                                     |
| 22d00224 | 0.06243 | ni     | putative N2                                                            | um04150   | 0.0081  | ni     | related to DOP1 - strong similarity to developmental regulatory gene                |
| 13c00065 | 0.06256 | K00589 | uroporphyrin III methyltransferase                                     | um02457   | 0.0081  | K03217 | related to OXA1 - cytochrome oxidase biogenesis protein                             |
| 12d00116 | 0.06288 | ni     | uncharacterized conserved protein                                      | um01823   | 0.00813 | ni     | hypothetical protein                                                                |
| 3a00030  | 0.06296 | ni     | hypothetical protein                                                   | um04352   | 0.00813 | K06685 | probable M081 protein                                                               |
| 11d00033 | 0.06302 | ni     | uncharacterized conserved protein                                      | um00616   | 0.00816 | ni     | related to Exocyst complex component Sec5                                           |
| 9c00334  | 0.06307 | K14566 | predicted nucleic-acid-binding protein                                 | um01532   | 0.0082  | ni     | putative protein                                                                    |
| 22d00122 | 0.06309 | ni     | hypothetical protein                                                   | um03714   | 0.00825 | ni     | related to lactose regulatory protein                                               |
| 12d00067 | 0.06328 | ni     | diadenosine and diphosphoinositol polyphosphate phosphohydrolase       | um10417   | 0.00825 | K09184 | related to transcription factor SGATA-6                                             |
| 13d00041 | 0.06333 | ni     | hypothetical protein                                                   | um03864   | 0.00828 | ni     | conserved hypothetical protein                                                      |
| 6d00096  | 0.06357 | ni     | hypothetical protein                                                   | um11970   | 0.00832 | ni     | putative protein                                                                    |
| 6c00126  | 0.06363 | ni     | hypothetical protein                                                   | um04019   | 0.00844 | ni     | putative protein                                                                    |
| 14d00043 | 0.06382 | ni     | hypothetical protein                                                   | um11456   | 0.00848 | K05293 | related to GPI - transamidase subunit                                               |
| 7d00239  | 0.06386 | K02516 | protein kinase inhibitor                                               | um00304   | 0.00848 | K01657 | probable TRP2 - anthranilate synthase component I                                   |
| 8a00116  | 0.0639  | ni     | component of vacuolar transporter chaperone                            | um02649   | 0.00849 | ni     | conserved hypothetical protein                                                      |
| 16d00074 | 0.064   | ni     | component of vacuolar transporter chaperone                            | um12122   | 0.0085  | K15687 | related to makorin ring zinc finger protein                                         |
| 4c00009  | 0.06401 | K03469 | hypothetical protein                                                   | um04126   | 0.00853 | ni     | conserved hypothetical protein                                                      |
| 25d00063 | 0.06407 | ni     | aspartyl protease                                                      | um03864   | 0.00854 | ni     | related to GTPase-activating protein beta-chimerin                                  |
| 19c00112 | 0.0641  | K02930 | ribosomal protein RPL1/RPL20L4/L4                                      | um04308   | 0.00854 | ni     | conserved hypothetical protein                                                      |
| 19d00029 | 0.06415 | K06215 | steirain cytochrome b5 reductase                                       | um01738   | 0.00856 | ni     | putative protein                                                                    |
| 7a00155  | 0.06411 | ni     | hypothetical protein                                                   | um02577   | 0.00862 | K00033 | probable 6-phosphogluconate dehydrogenase                                           |
| 5c00062  | 0.06417 | ni     | hypothetical protein                                                   | um04988   | 0.00862 | K15110 | probable ODC2 - Mitochondrial 2-oxodicarboxylate carrier                            |
| 7a00088  | 0.06423 | ni     | hypothetical protein                                                   | um02068   | 0.00865 | ni     | hypothetical protein                                                                |
| 9a00146  | 0.06432 | ni     | hypothetical protein                                                   | um00542   | 0.00867 | K10259 | related to TSC3 - Enoyl reductase involved in very long chain fatty acid elongation |
| 22d00077 | 0.06433 | ni     | enoyl-CoA hydratase                                                    | um05365   | 0.00867 | K04354 | probable protein phosphatase 2A regulatory B subunit                                |
| 2c00086  | 0.0645  | ni     | hypothetical protein                                                   | um04666   | 0.00869 | K17362 | conserved hypothetical protein                                                      |
| 7a00176  | 0.0646  | ni     | hypothetical protein                                                   | um05731   | 0.00871 | ni     | conserved hypothetical protein                                                      |
| 16d00055 | 0.06474 | ni     | hypothetical protein                                                   | um05644   | 0.00873 | ni     | related to alcohol dehydrogenase                                                    |
| 7a00122  | 0.06475 | ni     | predicted N6-adenine methylase involved in transcription regulation    | um10348   | 0.00882 | K00620 | related to ECOM2 - acetylornithine acetyltransferase                                |
| 7a00260  | 0.06486 | ni     | hypothetical protein                                                   | um02246   | 0.00885 | ni     | putative protein                                                                    |
| 9c00138  | 0.06497 | ni     | hypothetical protein                                                   | um11687   | 0.00885 | ni     | putative protein                                                                    |
| 13d00015 | 0.06508 | K10846 | 5'-3' exonuclease                                                      | um00576   | 0.00889 | K12592 | conserved hypothetical protein                                                      |
| 27d00033 | 0.06511 | ni     | muslin class V heavy chain                                             | um15027   | 0.00899 | ni     | putative protein                                                                    |
| 27c00027 | 0.06572 | K16576 | hypothetical protein                                                   | um11231   | 0.00905 | K01814 | probable bifunctional protein                                                       |
| 26c00055 | 0.06584 | ni     | cyclin B and related kinase-activating proteins                        | um04362   | 0.00905 | K07431 | related to Cytochrome P450 8B1                                                      |
| 22d00170 | 0.06588 | K01785 | predicted mutarotase                                                   | um02491   | 0.00907 | K00134 | glyceraldehyde 3-phosphate dehydrogenase                                            |
| 9a00099  | 0.06592 | K13106 | uncharacterized conserved protein                                      | um00676   | 0.00909 | K08869 | conserved hypothetical protein                                                      |
| 3a00045  | 0.06593 | K03104 | hypothetical protein                                                   | um10870   | 0.00913 | K01792 | hypothetical protein                                                                |
| 6a00044  | 0.06599 | ni     | transferrin receptor and related proteins                              | um11192   | 0.00915 | ni     | hypothetical protein                                                                |
| 4d00040  | 0.06611 | ni     | phosphatidylinositol 4-kinase                                          | um03726.2 | 0.00916 | K01802 | probable CPR1 - cyclophilin                                                         |
| 9c00120  | 0.06641 | K00490 | cytochrome P450 CYP4/CYP19/CYP26 subfamilies                           | um06391   | 0.00919 | ni     | related to multidrug resistant protein                                              |
| 9c00401  | 0.0664  | K14774 | uncharacterized conserved protein                                      | um11071   | 0.00921 | ni     | conserved hypothetical protein                                                      |
| 25d00084 | 0.06657 | ni     | hypothetical protein                                                   | um10633   | 0.00921 | ni     | conserved hypothetical protein                                                      |
| 18c00013 | 0.06661 | ni     | hypothetical protein                                                   | um01968   | 0.00922 | ni     | conserved hypothetical protein                                                      |
| 7d00171  | 0.06668 | K03097 | casein kinase II, alpha subunit                                        | um03304   | 0.00923 | ni     | conserved hypothetical protein                                                      |
| 7c00223  | 0.06707 | K10866 | DNA repair protein RAD50                                               | um02632   | 0.00927 | ni     | probable nucP protein                                                               |
| 14d00064 | 0.06711 | ni     | hypothetical protein                                                   | um04138   | 0.00929 | K00616 | probable TAL1 - transaldolase                                                       |
| 14c00032 | 0.06743 | ni     | hypothetical protein                                                   | um10436   | 0.0093  | ni     | conserved hypothetical protein                                                      |
| 3a00077  | 0.06763 | K11805 | conserved WD40 repeat-containing protein AN11                          | um04394   | 0.00934 | K14802 | probable P-type ATPase                                                              |
| 9c00007  | 0.06769 | ni     | hypothetical protein                                                   | um01228   | 0.00935 | K15029 | related to eIF3 - translation initiation factor 3 subunit L                         |
| 9c00030  | 0.06772 | K14729 | peroxisomal multifunctional beta-oxidation protein and related enzymes | um10823   | 0.00937 | ni     | conserved hypothetical protein                                                      |
| 27d00092 | 0.06782 | ni     | hypothetical protein                                                   | um11575   | 0.00936 | K01607 | conserved hypothetical protein                                                      |
| 19d00018 | 0.06786 | ni     | hypothetical protein                                                   | um11946   | 0.00937 | ni     | probable UDP-galactose 4-epimerase                                                  |
| 6a00107  | 0.06811 | K03350 | DNA-binding cell division cycle control protein                        | um04423   | 0.00945 | ni     | related to potassium transporter TRK-1                                              |
| 25c00055 | 0.06813 | K01090 | serine/threonine specific protein phosphatase                          | um10327   | 0.00953 | ni     | putative protein                                                                    |
| 9a00028  | 0.06836 | K02960 | 40S ribosomal protein S16                                              | um10765   | 0.00955 | ni     | conserved hypothetical protein                                                      |
| 5c00098  | 0.06839 | K03128 | TATA binding protein associated factor                                 | um05756.2 | 0.00962 | K10885 | related to ATP-dependent DNA helicase II                                            |
| 2a00010  | 0.06841 | K05755 | actin-related protein Arp2/3 complex, subunit ARP4                     | um05755.2 | 0.00965 | ni     | conserved hypothetical protein                                                      |
| 12d00108 | 0.06848 | ni     | hypothetical protein                                                   | um05113.2 | 0.00966 | K01754 | probable ILV1 - anabolic serine and threonine dehydratase precursor                 |
| 5c00006  | 0.06858 | K03948 | hypothetical protein                                                   | um12038   | 0.00967 | ni     | related to COT1 - Mitochondrial protein required for ER to Golgi transport          |
| 14d00045 | 0.06865 | K04482 | DNA repair protein RAD51/RHP55                                         | um00776   | 0.00967 | ni     | conserved hypothetical Ustilago-specific protein                                    |
| 6a00075  | 0.06882 | K03885 | NADH-dehydrogenase                                                     | um01948   | 0.00975 | ni     | hypothetical protein                                                                |
| 16c00033 | 0.06888 | ni     | FOG, TPR repeat                                                        | um01996   | 0.00975 | ni     | probable mfs-multidrug-resistance transporter                                       |
| 15d00056 | 0.06893 | ni     | hypothetical protein                                                   | um11451   | 0.00976 | K12179 | related to COP9 - signalosome complex subunit 6                                     |
| 3a00068  | 0.06895 | ni     | hypothetical protein                                                   | um11724   | 0.00979 | K10847 | related to DNA repair protein RAD14                                                 |
| 13d00092 | 0.06896 | K14400 | mRNA cleavage and polyadenylation factor I/II complex, subunit f       | um03842   | 0.0098  | K12867 | conserved hypothetical protein                                                      |
| 12c00090 | 0.06896 | ni     | hypothetical protein                                                   | um02318.2 | 0.0098  | ni     | conserved hypothetical protein                                                      |
| 3a00057  | 0.06903 | K14799 | uncharacterized conserved protein                                      | um05604   | 0.00981 | ni     | putative protein                                                                    |
| 22c00026 | 0.06906 | ni     | protein phosphatase 1 regulatory subunit, and related proteins         | um04267   | 0.00981 | ni     | related to importin beta-2 subunit                                                  |
| 8c00054  | 0.0694  | K01874 | methionyl-tRNA synthetase                                              | um11452   | 0.00982 | ni     | conserved hypothetical protein                                                      |
| 19d00125 | 0.06941 | ni     | hypothetical protein                                                   | um10016   | 0.00987 | ni     | conserved hypothetical protein                                                      |
| 11d00003 | 0.06946 | ni     | hypothetical protein                                                   | um03473   | 0.00991 | ni     | conserved hypothetical protein                                                      |
| 9c00258  | 0.06956 | ni     | predicted coiled-coil protein                                          | um01306   | 0.00998 | ni     | hypothetical protein                                                                |
| 27d00043 | 0.06962 | ni     | sexual differentiation process protein ISP4                            | um02768   | 0.01008 | ni     | conserved hypothetical protein                                                      |
| 18d00009 | 0.06984 | K03014 | RNA polymerase subunit K                                               | um05971   | 0.01009 | K01915 | probable glutamine synthetase                                                       |
| 2c00021  | 0.07004 | ni     | hypothetical protein                                                   | um04149   | 0.01012 | ni     | conserved hypothetical protein                                                      |
| 14d00030 | 0.07023 | K12614 | ATP-dependent RNA helicase                                             | um11500   | 0.01024 | K14688 | related to COT1 - Vacuolar zinc                                                     |
| 13c00073 | 0.07025 | ni     | hypothetical protein                                                   | um11638   | 0.01025 | K00621 | related to glucosamine 6-phosphate n-acetyltransferase                              |
| 18c00106 | 0.07041 | ni     | hypothetical protein                                                   | um00884   | 0.01027 | ni     | related to RalG protein                                                             |
| 14d00021 | 0.0705  | ni     | hypothetical protein                                                   | um04474   | 0.0103  | K04640 | guanine nucleotide-binding protein alpha-3 subunit                                  |
| 9a00100  | 0.07081 | ni     | hypothetical protein                                                   | um10669   | 0.0103  | ni     | conserved hypothetical protein                                                      |
| 14d00055 | 0.07118 | ni     | hypothetical protein                                                   | um00322   | 0.01031 | K03143 | related to TFIIB basal transcription factor complex p34 subunit                     |
| 2c00041  | 0.07137 | ni     | clathrin assembly protein AP180 and related proteins                   | um11624.2 |         |        |                                                                                     |

|          |         |        |                                                                   |           |         |        |                                                                                 |
|----------|---------|--------|-------------------------------------------------------------------|-----------|---------|--------|---------------------------------------------------------------------------------|
| 18d00101 | 0.07547 | ni     | chromatin remodeling complex WSTF-ISWI, small subunit             | um10790   | 0.01115 | K11808 | probable phosphoribosyl-5-aminoimidazole carboxylase                            |
| 2d00031  | 0.07581 | K13237 | reduces with broad range of substrate specificities               | um01116   | 0.01116 | ni     | related to G1                                                                   |
| 11d00002 | 0.07628 | K12736 | cyclophilin-related peptidyl-prolyl cis-trans isomerase           | um02783   | 0.01116 | K00826 | related to branched-chain amino acid aminotransferase                           |
| 8d00055  | 0.07641 | ni     | hypothetical protein                                              | um01877   | 0.01117 | ni     | putative protein                                                                |
| 6c00051  | 0.07649 | ni     | cytochrome P450 CYP3/CYP5/CYP6/CYP subfamilies                    | um01191   | 0.01118 | K02607 | conserved hypothetical protein                                                  |
| 10d00070 | 0.07657 | ni     | hypothetical protein                                              | um06079   | 0.01119 | K01669 | related to deoxyribodipyrimidine photo-lyase PHR                                |
| 16d00072 | 0.07671 | ni     | hypothetical protein                                              | um00379   | 0.01124 | ni     | conserved hypothetical protein                                                  |
| 14c00123 | 0.07702 | ni     | hypothetical protein                                              | um011752  | 0.01131 | ni     | conserved hypothetical protein                                                  |
| 19d00001 | 0.07702 | ni     | hypothetical protein                                              | um10359   | 0.01132 | K03017 | probable DNA-directed RNA polymerase II 14                                      |
| 19d00007 | 0.07716 | ni     | hypothetical protein                                              | um12154   | 0.01133 | K12600 | related to SKI3 - protein involved in exosome mediated 3                        |
| 19d00040 | 0.07748 | K09419 | heat shock transcription factor                                   | um00375   | 0.01134 | ni     | putative protein                                                                |
| 22c00020 | 0.07797 | K01987 | arginine synthetase                                               | um02558   | 0.01135 | K01338 | related to ATP-dependent protease La                                            |
| 19d00027 | 0.07819 | K00344 | predicted quinine oxidoreductase                                  | um11669   | 0.01137 | ni     | related to syntaxin family member TLG1                                          |
| 9d00324  | 0.07821 | ni     | predicted exonuclease                                             | um01720   | 0.01138 | ni     | probable phosphomannosylase                                                     |
| 19c00124 | 0.0783  | K15378 | sucrose transporter and related proteins                          | um10534   | 0.01139 | ni     | related to Protein-tyrosine phosphatase                                         |
| 12c0145  | 0.07837 | ni     | hypothetical protein                                              | um01265   | 0.01141 | ni     | related to RNA-binding protein                                                  |
| 7d00135  | 0.07857 | ni     | hypothetical protein                                              | um00329   | 0.01145 | ni     | conserved hypothetical protein                                                  |
| 7d00127  | 0.0787  | K03120 | TATA-box binding protein                                          | um00328   | 0.01148 | K07508 | probable ERG10 - acetyl-CoA C-acetyltransferase                                 |
| 7d00114  | 0.07885 | K02997 | ribosomal protein S4                                              | um11384   | 0.01167 | ni     | probable pterin-4-alpha-carbinolamine dehydratase                               |
| 24d00048 | 0.07894 | ni     | hypothetical protein                                              | um10081   | 0.01175 | ni     | conserved hypothetical Ustilago-specific protein                                |
| 16c00079 | 0.0792  | ni     | hypothetical protein                                              | um01403   | 0.01175 | ni     | conserved hypothetical protein                                                  |
| 19d00139 | 0.07933 | K14801 | hypothetical protein                                              | um00565   | 0.01183 | K09499 | probable CCT7 - component of chaperonin-containing T-complex                    |
| 6c00036  | 0.07979 | ni     | amino acid transporter protein                                    | um03994   | 0.01199 | K01568 | probable PDC1 - pyruvate decarboxylase                                          |
| 19d00005 | 0.07988 | ni     | hypothetical protein                                              | um05504   | 0.012   | K01920 | related to glutathione synthase                                                 |
| 22c00319 | 0.08006 | ni     | phosphoinositide phosphatase SAC1                                 | um02007   | 0.012   | K01519 | probable HAM1 - protein involved in DNA repair                                  |
| 20c00013 | 0.08033 | ni     | hypothetical protein                                              | um11986   | 0.012   | K10405 | c-terminal kinase                                                               |
| 18d00078 | 0.08042 | K03424 | tand-related DNase                                                | um10636   | 0.01213 | ni     | conserved hypothetical protein                                                  |
| 19c00049 | 0.08051 | ni     | hypothetical protein                                              | um01407   | 0.01216 | K13519 | conserved hypothetical protein                                                  |
| 9d00253  | 0.08053 | ni     | hypothetical protein                                              | um00560   | 0.01217 | K03083 | probable glycogen synthase kinase 3 alpha                                       |
| 13c00008 | 0.08055 | K12881 | RRM motif-containing protein                                      | um10479   | 0.01219 | ni     | conserved hypothetical protein                                                  |
| 3c00043  | 0.08071 | ni     | hypothetical protein                                              | um01561   | 0.01222 | K06965 | probable Fnltsa protein                                                         |
| 7d00010  | 0.08089 | K00293 | lysine-methylglutamate reductase                                  | um01736   | 0.01221 | ni     | conserved hypothetical protein                                                  |
| 16d00008 | 0.08091 | ni     | uncharacterized integral membrane protein                         | um05652   | 0.01227 | K02726 | probable PRE8 - 20S proteasome subunit Y7                                       |
| 4d00032  | 0.08095 | K00721 | dolichol-phosphate mannosyltransferase                            | um05653.2 | 0.01235 | ni     | conserved hypothetical protein                                                  |
| 9c00101  | 0.08114 | ni     | hypothetical protein                                              | 0.01236   | K00223  | ni     | probable ERG4 - sterol C-24 reductase                                           |
| 16c00053 | 0.08129 | ni     | hypothetical protein                                              | um11475   | 0.01239 | ni     | putative protein                                                                |
| 6d00030  | 0.08142 | ni     | hypothetical protein                                              | um02581   | 0.01239 | K01535 | probable PMA1 - H - transporting P-type ATPase                                  |
| 9c00381  | 0.08186 | ni     | hypothetical protein                                              | um04282   | 0.01246 | ni     | related to 3-phlyase A precursor                                                |
| 7d00037  | 0.08209 | K03357 | angaphase-promoting complex (APC), subunit 10                     | um12488   | 0.01247 | K00418 | probable heat-shock protein hsp60                                               |
| 15c00068 | 0.08227 | K07151 | oligosaccharyltransferase, STT3 subunit                           | um10627   | 0.0125  | ni     | conserved hypothetical protein                                                  |
| 9c00266  | 0.08231 | K01835 | phosphoglucomutase                                                | um00319   | 0.01251 | K06072 | conserved hypothetical protein                                                  |
| 20d00013 | 0.08273 | ni     | hypothetical protein                                              | um11019   | 0.01255 | K12826 | related to PRP11 - pre-mRNA splicing factor                                     |
| 13c00044 | 0.08274 | ni     | hypothetical protein                                              | um10649   | 0.01258 | ni     | conserved hypothetical protein                                                  |
| 13c00103 | 0.0828  | ni     | hypothetical protein                                              | um10238   | 0.01261 | K02883 | probable GOS ribosomal protein L18                                              |
| 5d00007  | 0.08296 | K00620 | putative glutamate/ornithine acetyltransferase                    | um04030   | 0.01274 | ni     | conserved hypothetical protein                                                  |
| 7d00131  | 0.08305 | K15322 | tRNA splicing endonuclease SEN2                                   | um10167   | 0.01278 | K00134 | glyceraldehyde 3-phosphate dehydrogenase                                        |
| 5d00084  | 0.08321 | K13346 | hypothetical protein                                              | um15006   | 0.01281 | ni     | conserved hypothetical protein                                                  |
| 7d00026  | 0.08323 | ni     | hypothetical protein                                              | um05631   | 0.0129  | K04077 | probable heat-shock protein hsp60                                               |
| 1c00033  | 0.08334 | ni     | DEAH-box RNA helicase                                             | um11585   | 0.01291 | ni     | related to capsular associated protein                                          |
| 9c00233  | 0.08338 | ni     | DEAH-box RNA helicase                                             | um05942   | 0.01301 | ni     | related to monocarboxylate permease                                             |
| 18c00035 | 0.08339 | ni     | hypothetical protein                                              | um11634   | 0.01307 | ni     | related to KAP114 - Member of the karyopherin-beta family                       |
| 22c00237 | 0.08352 | ni     | methyltransferase                                                 | um05412   | 0.01311 | ni     | related to quininate 5-dehydrogenase                                            |
| 22c00157 | 0.08355 | ni     | hypothetical protein                                              | um11923   | 0.01314 | K17450 | probable mitochondrial acylate hydratase                                        |
| 9c00429  | 0.08356 | K14848 | ribosome Assembly protein                                         | um03392.2 | 0.01318 | ni     | putative protein                                                                |
| 19d00068 | 0.08368 | ni     | hypothetical protein                                              | um12230.2 | 0.01322 | ni     | putative protein                                                                |
| 9d00397  | 0.08369 | ni     | hypothetical protein                                              | um05028   | 0.01326 | K10742 | related to DNA2 - DNA helicase                                                  |
| 2d00059  | 0.08402 | K14808 | ATP-dependent RNA helicase                                        | um02101   | 0.0134  | ni     | putative protein                                                                |
| 16c00109 | 0.08422 | ni     | hypothetical protein                                              | um02304   | 0.01351 | ni     | putative protein                                                                |
| 6c00013  | 0.08426 | ni     | hypothetical protein                                              | um01943   | 0.01362 | ni     | related to alpha-glucosidase                                                    |
| 9d00292  | 0.08436 | ni     | hypothetical protein                                              | um00599   | 0.01363 | K03512 | related to DNA polymerase mu                                                    |
| 7d00152  | 0.08437 | K14676 | predicted esterase of the alpha-beta hydrolase superfamily        | um00924   | 0.01365 | K03231 | probable translation elongation factor eEF-1 alpha chain                        |
| 1c00026  | 0.08443 | ni     | hypothetical protein                                              | um00923   | 0.01365 | K00737 | related to N-acetylglucosaminyltransferase                                      |
| 7d00019  | 0.08453 | K16576 | actin and related proteins                                        | um10009   | 0.01375 | ni     | related to ARO80 - positive transcription regulator of ARO9 and ARO10           |
| 13d00016 | 0.08455 | ni     | cutinins                                                          | um01926   | 0.01375 | K01477 | related to DAL2 - allantoinase                                                  |
| 22c00171 | 0.08467 | K06901 | hypothetical protein                                              | um10166   | 0.01377 | K03027 | probable Rpo40 - 40 kD subunit of DNA-directed RNA polymerases I and III        |
| 22d00123 | 0.08467 | ni     | uncharacterized conserved protein                                 | um00919   | 0.01377 | K05863 | probable ADP                                                                    |
| 7d00052  | 0.08492 | ni     | hypothetical protein                                              | um02436   | 0.01378 | K01530 | probable NE01 - P-type ATPase                                                   |
| 9d00185  | 0.085   | ni     | hypothetical protein                                              | um04043   | 0.01383 | ni     | conserved hypothetical protein                                                  |
| 6c00116  | 0.08502 | K08827 | U4/U6-associated splicing factor PRP4                             | um01758   | 0.01387 | ni     | related to ABC transporter                                                      |
| 20d00025 | 0.08504 | ni     | hypothetical protein                                              | um11603   | 0.01387 | ni     | related to RPS08 - 40S ribosomal protein p40 homolog B                          |
| 20d00027 | 0.08505 | K03846 | hypothetical protein                                              | um12550   | 0.01387 | ni     | probable ribosomal protein L41                                                  |
| 14d00086 | 0.08538 | K11826 | adaptor complexes medium subunit family                           | um03552.2 | 0.01395 | ni     | hypothetical protein                                                            |
| 9c00126  | 0.08558 | ni     | vacuolar import and degradation protein                           | um02316   | 0.01396 | ni     | conserved hypothetical protein                                                  |
| 10d00040 | 0.08571 | K01867 | cytoplasmic tryptophanyl-tRNA synthetase                          | um02377   | 0.01409 | K00428 | probable cytochrome c peroxidase precursor                                      |
| 9c00238  | 0.08572 | K00697 | trichothiallen-6-phosphate synthase component TPS1 and related su | um10678   | 0.01411 | K10398 | related to KIP1 - kinesin-related protein                                       |
| 22c00113 | 0.0858  | ni     | hypothetical protein                                              | um1223    | 0.01414 | ni     | putative protein                                                                |
| 22d00113 | 0.08581 | K11229 | MEKK and related serine/threonine protein kinases                 | um02383   | 0.01414 | K04627 | alpha2-pherrnone receptor Pra1                                                  |
| 8c00096  | 0.08586 | K13035 | carbon-nitrogen hydrolase                                         | um11891   | 0.01418 | ni     | conserved hypothetical protein                                                  |
| 16d00020 | 0.08591 | ni     | hypothetical protein                                              | um01821   | 0.01422 | ni     | probable KRE2 - alpha-1                                                         |
| 9d00093  | 0.08594 | K14768 | WD40-repeat-containing subunit of the 18S rRNA processing co      | um10018   | 0.01429 | ni     | related to ERD18 protein                                                        |
| 7d00001  | 0.086   | ni     | metalloprotease                                                   | um00247   | 0.01433 | ni     | conserved hypothetical protein                                                  |
| 22c00054 | 0.086   | ni     | hypothetical protein                                              | um05032   | 0.01434 | ni     | related to NIT3 - nitrilase                                                     |
| 9d00107  | 0.08603 | ni     | hypothetical protein                                              | um10378   | 0.01442 | K16261 | related to DIP5 - glutamate and aspartate permease                              |
| 9c00399  | 0.08607 | ni     | Kelch repeat-containing proteins                                  | um00965   | 0.01454 | ni     | related to cardenitol cleavage dioxygenase 1                                    |
| 12c00038 | 0.08633 | ni     | hypothetical protein                                              | um01117   | 0.01454 | K00698 | chitin Synthase 4                                                               |
| 12d00007 | 0.08644 | K01555 | fumarylacetoacetase                                               | um03908   | 0.01458 | ni     | hypothetical protein                                                            |
| 5c00017  | 0.0865  | K02915 | 60S ribosomal protein L34                                         | um01860   | 0.01463 | K04794 | related to PTH2 - aminoacyl-tRNA hydrolase                                      |
| 13c00026 | 0.08674 | ni     | hypothetical protein                                              | um11511   | 0.01467 | K12981 | related to YRA1 - RNA annealing protein                                         |
| 10d00065 | 0.08677 | ni     | carbon-nitrogen hydrolase                                         | um00848   | 0.01479 | K14751 | probable caseinase 1 hsp1                                                       |
| 20d0040  | 0.08683 | ni     | hypothetical protein                                              | um11270   | 0.01511 | K10256 | related to Delta-12 fatty acid desaturase                                       |
| 22c00170 | 0.08687 | K01792 | uncharacterized enzymes related to aldose 1-epimerase             | um04508   | 0.01514 | K14782 | related to BFR2 - involved in protein transport steps at the Brefeldin A blocks |
| 22c00306 | 0.08688 | ni     | hypothetical protein                                              | um06004   | 0.01515 | ni     | probable HNT1 - Adenosine 5                                                     |
| 7d00240  | 0.08718 | ni     | hypothetical protein                                              | um10514   | 0.01517 | ni     | conserved hypothetical protein                                                  |
| 9d00386  | 0.08744 | ni     | mitochondrial import inner membrane translocase, subunit TIM17    | um12155.2 | 0.01519 | K08741 | related to MtuS protein homolog 5                                               |
| 5d00130  | 0.08776 | ni     | FOG, RRM domain                                                   | um11686   | 0.01519 | ni     | ni                                                                              |
| 7d00073  | 0.08786 | ni     | hypothetical protein                                              | um00589   | 0.01522 | K01069 | related to GLO4 - glyoxalase II                                                 |
| 16d00054 | 0.08811 | K03850 | alpha-1,2 glucosyltransferase                                     | um02449   | 0.01525 | K09104 | related to centromere binding factor 1                                          |
| 12c00019 | 0.08813 | K15223 | RNA polymerase I transcription factor UAF                         | um12002   | 0.01528 | K11415 | related to NAD-dependent deacetylase Siruin 5                                   |
| 22c00215 | 0.08868 | ni     | hypothetical protein                                              | um10698   | 0.01531 | ni     | related to NEFA-interacting nuclear protein NIP30                               |
| 12c00053 | 0.08882 | K00030 | isocitrate dehydrogenase, gamma subunit                           | um10484   | 0.01533 | K10101 | related to ALG7 - UDP-N-acetylglucosamine-1-phosphate transferase               |
| 14d00093 | 0.08892 | ni     | hypothetical protein                                              | um02219   | 0.01545 | ni     | putative protein                                                                |
| 8c00103  | 0.08895 | K10689 | ubiquitin conjugating enzyme                                      | um01632   | 0.01547 | ni     | conserved hypothetical protein                                                  |
| 27d00073 | 0.08901 | K12198 | RNA polymerase II transcription factor complex subunit            | um01642   | 0.01549 | ni     | related to NAD-dependent deacetylase Siruin 5                                   |
| 12c00004 | 0.08901 | ni     | hypothetical protein                                              | um06157   | 0.01557 | ni     | related to Spherulin 4 precursor                                                |
| 11c00023 | 0.08901 | ni     | guanine nucleotide exchange factor                                | um03547.2 | 0.01565 | ni     | putative protein                                                                |
| 22c00194 | 0.08906 | K03635 | molybdopterin converting factor subunit 2                         | um01981   | 0.01574 | ni     | related to Malonyl CoA-acyl carrier protein transacylase                        |
| 27c00087 | 0.08915 | K02966 | 40S ribosomal protein S19                                         | um01755   | 0.01575 | K09503 | related to Chai1 homolog subfamily A member 2                                   |
| 7d00172  | 0.08916 | ni     | hypothetical protein                                              | um03073   | 0.01581 | ni     | related to GTT1 - glutathione S-transferase                                     |
| 5c00042  | 0.0892  | K11996 | molybdopterin synthase sulfurylase                                | um05345   | 0.01585 | ni     | conserved hypothetical protein                                                  |
| 9c00169  | 0.08931 | K15429 | tRNA modification enzyme                                          | um15091   | 0.01588 | ni     | conserved hypothetical protein                                                  |
| 3d00020  | 0.08934 | K00916 | cod2-related protein kinase                                       | um04499   | 0.01592 | ni     | conserved hypothetical protein                                                  |
| 19d00064 | 0.08936 | ni     | acyltransferase required for palmitoylation                       | um03458   | 0.01604 | ni     | hypothetical protein                                                            |
| 2c00046  | 0.08959 | K09523 | dsRNA-activated protein kinase inhibitor P58                      | um12235   | 0.01606 | ni     | hypothetical protein                                                            |
| 8c00033  | 0.0896  | K05302 | uncharacterized conserved protein                                 | um10164   | 0.01606 | K10583 | related to E2 ubiquitin-conjugating enzyme                                      |
| 9d00070  | 0.08964 | K12830 | splicing factor 3b, subunit 3                                     | um11793   | 0.01616 | K07950 | probable ARL1 - ADP-ribosylation factor                                         |
| 9c00259  | 0.08971 | K08741 | mitochondrial ATPase MSH5                                         | um01893   | 0.01621 | K01836 | probable PCN11 - phosphocystadylglucosamine mutase                              |
| 9c00163  | 0.08997 | K03507 | nucleotide excision repair factor NEF2, RAD4/CUT5 component       | um02618.2 | 0.01625 | K08063 | probable transcriptional coregulator Swr1                                       |
| 19c00034 | 0.09002 | ni     | hypothetical protein                                              | um11327   | 0.01636 | K17302 | probable SEC27 - coatomer complex beta subunit                                  |
| 8d00031  | 0.09011 | K00877 | phosphomethylpyrimidine kinase                                    | um11241   | 0.0164  | ni     | related to aldehyde dehydrogenase                                               |
| 6d00037  | 0.09011 | K01230 | 1, 2-alpha-mannosidase                                            | um10463   | 0.0165  |        |                                                                                 |

|          |         |        |                                                                      |           |         |        |                                                                                                                    |
|----------|---------|--------|----------------------------------------------------------------------|-----------|---------|--------|--------------------------------------------------------------------------------------------------------------------|
| 12c00132 | 0.09434 | K12897 | hsp27-ere-tata-binding protein/Scaffold attachment factor            | um10448.2 | 0.01804 | ni     | conserved hypothetical protein                                                                                     |
| 3c00010  | 0.09462 | ni     | protein kinase PCTAIRE and related kinases                           | um10974.2 | 0.01816 | ni     | related to tetrahydrofolylpolyglutamate synthase                                                                   |
| 6d00079  | 0.09465 | ni     | predicted membrane protein                                           | um002360  | 0.01818 | K01247 | conserved hypothetical protein                                                                                     |
| 8d00034  | 0.09481 | K10258 | steroid reductase required for elongation of the very long chain fat | um11438   | 0.0183  | ni     | conserved hypothetical protein                                                                                     |
| 18c00077 | 0.095   | K15071 | exocyst subunit - Sec10p                                             | um10046   | 0.01836 | ni     | conserved hypothetical protein                                                                                     |
| 7b00026  | 0.09503 | ni     | hypothetical protein                                                 | um05401   | 0.01844 | ni     | conserved hypothetical protein                                                                                     |
| 3a00032  | 0.09521 | K12812 | ATP-dependent RNA helicase                                           | um04992.2 | 0.01851 | ni     | conserved hypothetical protein                                                                                     |
| 25c00045 | 0.09529 | ni     | hypothetical protein                                                 | um02574   | 0.01863 | ni     | related to nucleotide-binding factor                                                                               |
| 7c00072  | 0.09541 | K02021 | peptide exporter                                                     | um11824   | 0.01873 | ni     | hypothetical protein                                                                                               |
| 2c00069  | 0.09546 | ni     | hypothetical protein                                                 | um05490   | 0.01873 | ni     | hypothetical protein                                                                                               |
| 15d00012 | 0.09561 | K03361 | cdc4 and related F-box and WD-40 proteins                            | um01327   | 0.01873 | ni     | related to Acetylcholinesterase precursor                                                                          |
| 8d00006  | 0.09598 | ni     | hypothetical protein                                                 | um006932  | 0.01875 | ni     | conserved hypothetical protein                                                                                     |
| 12c00083 | 0.09601 | K14007 | vesicle coat complex COPII, subunit SFB3                             | um01111   | 0.01883 | ni     | putative protein                                                                                                   |
| 9d00021  | 0.09627 | ni     | hypothetical protein                                                 | um10751   | 0.01885 | K03141 | related to TFB1 - subunit of RNA polymerase II transcription initiation factor TFIIF                               |
| 16d00046 | 0.09628 | ni     | hypothetical protein                                                 | um04945   | 0.01887 | ni     | putative protein                                                                                                   |
| 22d00118 | 0.09663 | K14546 | hypothetical protein                                                 | um02267   | 0.01889 | ni     | putative protein                                                                                                   |
| 6d00014  | 0.09639 | K01797 | hypothetical protein                                                 | um12101   | 0.01893 | ni     | conserved hypothetical protein                                                                                     |
| 13c00052 | 0.09669 | ni     | TFIIF-interacting CTD phosphatase, including NLI-interacting fac     | um04312   | 0.01894 | ni     | related to alpha-actinin                                                                                           |
| 16d00005 | 0.09675 | ni     | hypothetical protein                                                 | um02345   | 0.01897 | ni     | putative protein                                                                                                   |
| 22c00066 | 0.09681 | K03946 | NADH, ubiquinone oxidoreductase NDUF2A/B2 subunit                    | um00350   | 0.01899 | K09831 | probable ERG5 - C-22 sterol desaturase                                                                             |
| 9c00275  | 0.09683 | ni     | hypothetical protein                                                 | um04852   | 0.019   | ni     | hypothetical protein                                                                                               |
| 7b00209  | 0.09696 | ni     | hypothetical protein                                                 | um01672   | 0.01906 | K01899 | probable succinyl-coa synthetase alpha chain                                                                       |
| 26c00067 | 0.09708 | K14430 | Nav/dicarboxylate                                                    | um11304   | 0.0191  | ni     | conserved hypothetical protein                                                                                     |
| 5a00062  | 0.09729 | ni     | heavy metal exporter HMT1                                            | um01790   | 0.01912 | ni     | related to DNA ligase                                                                                              |
| 25c00006 | 0.09777 | ni     | hypothetical protein                                                 | um02010   | 0.01919 | K01626 | related to family II 2-keto-3-deoxy-D-arabino-heptulosonate 7-phosphate synthase                                   |
| 24c00043 | 0.09785 | I0849  | structurally specific endonuclease ERCC1-XPF, ERCC1 component        | um01211   | 0.01924 | ni     | conserved hypothetical protein                                                                                     |
| 13c00035 | 0.09792 | ni     | hypothetical protein                                                 | um03775   | 0.01932 | K00326 | related to MCR1 - cytochrome-b5 reductase                                                                          |
| 15c00015 | 0.09828 | K11839 | ubiquitin C-terminal hydrolase                                       | um01264   | 0.01934 | ni     | conserved hypothetical protein                                                                                     |
| 19d00017 | 0.09839 | ni     | predicted membrane protein                                           | um10672.2 | 0.01941 | ni     | hypothetical protein                                                                                               |
| 22d00076 | 0.09861 | K00587 | farnesyl cysteine-carboxyl methyltransferase                         | um10151   | 0.01963 | ni     | conserved hypothetical protein                                                                                     |
| 10c00004 | 0.09884 | K15111 | mitochondrial carrier protein PETa                                   | um11302   | 0.01983 | ni     | conserved hypothetical protein                                                                                     |
| 12c00089 | 0.0988  | ni     | hypothetical protein                                                 | um02258   | 0.01989 | K02021 | probable ATP-binding cassette                                                                                      |
| 10d00092 | 0.09903 | ni     | dual specificity phosphatase                                         | um02071   | 0.01997 | ni     | conserved hypothetical protein                                                                                     |
| 13d00111 | 0.09905 | K11594 | ATP-dependent RNA helicase                                           | um03377   | 0.01997 | ni     | hypothetical protein                                                                                               |
| 9c00282  | 0.0991  | K15128 | RNA polymerase II transcriptional regulation mediator                | um01729   | 0.01999 | K10755 | probable RFC4 - DNA replication factor C                                                                           |
| 6d00119  | 0.09942 | ni     | GYF domain containing protein                                        | um02886.2 | 0.02003 | ni     | related to ATM1 - Mitochondrial inner membrane ABC transporter involved in the maturation of cytosolic iron-sulfur |
| 10d00081 | 0.09952 | ni     | low density lipoprotein receptor                                     | um02899   | 0.02004 | K01681 | probable acronitase                                                                                                |
| 25d00061 | 0.09982 | ni     | hypothetical protein                                                 | um11097   | 0.02004 | K00420 | related to QCR10 - ubiquinol--cytochrome-c reductase 8                                                             |
| 22c00176 | 0.10016 | K09503 | molecular chaperone                                                  | um02463   | 0.02015 | K09602 | conserved hypothetical protein                                                                                     |
| 14d00103 | 0.10025 | ni     | molecular chaperone                                                  | um12265.2 | 0.02015 | ni     | conserved hypothetical protein                                                                                     |
| 7d00199  | 0.10049 | K08332 | armadillo repeat protein VAC8                                        | um02578   | 0.02017 | ni     | related to Het-c heterokaryon incompatibility protein                                                              |
| 9d00176  | 0.10058 | K03250 | transcription initiation factor 3, subunit e                         | um00223   | 0.02018 | K09885 | related to aquaporin                                                                                               |
| 9c00134  | 0.10061 | K01533 | cation transport ATPase                                              | um00896   | 0.02032 | K11498 | Kinesin-7a motor protein                                                                                           |
| 4c000203 | 0.10078 | ni     | hypothetical protein                                                 | um05480   | 0.02033 | K00369 | chitin Synthase 7                                                                                                  |
| 7d00229  | 0.10092 | K03347 | culmins                                                              | um02380   | 0.02035 | K15325 | hypothetical protein                                                                                               |
| 22c00065 | 0.10121 | K06965 | meiotic cell division protein Pelota/DOM34                           | um05776   | 0.02043 | K04487 | probable Cysteine desulfurase                                                                                      |
| 7d00076  | 0.10128 | ni     | hypothetical protein                                                 | um00366   | 0.02047 | K02542 | probable MCM6 - involved in replication                                                                            |
| 9c00212  | 0.1013  | K01115 | phospholipase D1                                                     | um11906   | 0.02068 | ni     | probable MRS11 - subunit of the Tim22-complex                                                                      |
| 22d00279 | 0.10131 | ni     | dimeric dihydrodipicolinate dehydrogenase                            | um10892   | 0.0207  | K03424 | conserved hypothetical protein                                                                                     |
| 5c00117  | 0.10156 | ni     | synaptic vesicle transporter SVOP and related transporters           | um05892   | 0.02082 | K11121 | related to NAD-dependent histone deacetylase                                                                       |
| 19d00111 | 0.10156 | ni     | vacuolar assembly/sorting proteins VPS39/VAM6/VPS3                   | um00499   | 0.02083 | ni     | conserved hypothetical protein                                                                                     |
| 22c00200 | 0.10158 | ni     | hypothetical protein                                                 | um11181   | 0.02086 | ni     | probable LEU2 - beta-isopropyl-malate dehydrogenase                                                                |
| 14d00025 | 0.10169 | ni     | hypothetical protein                                                 | um06293   | 0.02087 | ni     | conserved hypothetical protein                                                                                     |
| 22c00162 | 0.10201 | K07880 | GTPase Rab4                                                          | um02862   | 0.02088 | ni     | conserved hypothetical protein                                                                                     |
| 7c00077  | 0.10225 | ni     | hypothetical protein                                                 | um12222   | 0.02091 | ni     | putative protein                                                                                                   |
| 19d00013 | 0.10241 | ni     | hypothetical protein                                                 | um03308   | 0.02092 | K11142 | related to Cytosol aminopeptidase                                                                                  |
| 25d00055 | 0.1025  | K11096 | small nuclear ribonucleoprotein                                      | um02760   | 0.02092 | K02325 | related to DNA polymerase epsilon subunit B                                                                        |
| 22c00022 | 0.10261 | I0659  | genotoxin complex, DGRIP84/SPC97 component                           | um02113   | 0.02093 | ni     | conserved hypothetical protein                                                                                     |
| 7d00023  | 0.10263 | ni     | hypothetical protein                                                 | um05042.2 | 0.02094 | ni     | conserved hypothetical protein                                                                                     |
| 7d00253  | 0.10263 | ni     | hypothetical protein                                                 | um00206.2 | 0.02096 | ni     | conserved hypothetical protein                                                                                     |
| 24c00022 | 0.10272 | K01881 | prolyl-tRNA synthetase                                               | um05785   | 0.02103 | ni     | acyl transferase-like protein                                                                                      |
| 9c00223  | 0.10292 | K02304 | hypothetical protein                                                 | um05362   | 0.02103 | ni     | conserved hypothetical protein                                                                                     |
| 6c00021  | 0.10311 | ni     | hypothetical protein                                                 | um00512   | 0.02109 | K03937 | probable NADH-ubiquinone oxidoreductase 21 kDa subunit                                                             |
| 15c00062 | 0.10327 | ni     | predicted transporter                                                | um05628.2 | 0.0211  | ni     | conserved hypothetical protein                                                                                     |
| 3a00098  | 0.10381 | ni     | ras 1 guanine nucleotide exchange factor                             | um03396   | 0.02117 | ni     | conserved hypothetical protein                                                                                     |
| 8d00007  | 0.10386 | ni     | FOG, Zn-finger                                                       | um11009   | 0.02121 | K08737 | related to MSH6 - DNA mismatch repair protein                                                                      |
| 26c00005 | 0.10409 | ni     | hypothetical protein                                                 | um01521   | 0.02123 | K01465 | dihydrorase                                                                                                        |
| 9d00285  | 0.10429 | ni     | hypothetical protein                                                 | um04169   | 0.02128 | ni     | related to leucine zipper-EF-hand containing transmembrane protein 1                                               |
| 10d00061 | 0.1044  | K14238 | glutamate decarboxylase and related proteins                         | um00381   | 0.02132 | K03953 | probable NADH2 dehydrogenase                                                                                       |
| 6c00083  | 0.10443 | K01580 | glutamate decarboxylase and related proteins                         | um06268   | 0.02134 | K16302 | related to MAM3 - Protein required for normal mitochondrial morphology                                             |
| 9c00311  | 0.10445 | ni     | actin-binding protein SLAZ                                           | um11053   | 0.0214  | ni     | conserved hypothetical protein                                                                                     |
| 9c00033  | 0.10446 | ni     | hypothetical protein                                                 | um00610   | 0.02146 | ni     | conserved hypothetical protein                                                                                     |
| 7c00117  | 0.10446 | K14684 | mitochondrial solute carrier protein                                 | um01011   | 0.02147 | ni     | related to lariat-debranching enzyme                                                                               |
| 9c00177  | 0.10447 | ni     | hypothetical protein                                                 | um11907.2 | 0.02156 | ni     | conserved hypothetical protein                                                                                     |
| 15d00044 | 0.10514 | ni     | molecular chaperones HSP70/HSC70                                     | um04622   | 0.02163 | K01490 | probable AMD1 - AMP deaminase                                                                                      |
| 9c00112  | 0.10532 | ni     | hypothetical protein                                                 | um04783   | 0.02173 | K13116 | probable DEAD-box ATP-dependent RNA helicase 35                                                                    |
| 15c00075 | 0.10565 | K14840 | cellular protein                                                     | um10654   | 0.02179 | K10845 | related to TFB5 - component of general transcription and DNA repair factor TFIIF                                   |
| 9d00296  | 0.10579 | ni     | hypothetical protein                                                 | um03793   | 0.02185 | K11362 | putative protein                                                                                                   |
| 7d00017  | 0.10635 | ni     | hypothetical protein                                                 | um02628   | 0.02186 | K02999 | related to DNA-directed RNA polymerase I                                                                           |
| 5c00029  | 0.10636 | ni     | cytochrome beta-synthase and related enzymes                         | um06234   | 0.02188 | K03243 | probable GTPase                                                                                                    |
| 14d00104 | 0.10639 | ni     | CDK kinase-activating protein cyclin T                               | um12309   | 0.0219  | ni     | conserved hypothetical protein                                                                                     |
| 26d00003 | 0.10643 | K11415 | sirtuin 5 and related class III sirtuins                             | um04378   | 0.0219  | ni     | related to phenylacetaldehyde dehydrogenase                                                                        |
| 7d00173  | 0.10672 | K17218 | sulfide, quinone oxidoreductase                                      | um02401   | 0.02191 | K14396 | related to poly                                                                                                    |
| 5d00147  | 0.10689 | K00850 | pyrophosphate-dependent phosphofructo-1-kinase                       | um11631   | 0.02199 | ni     | hypothetical protein                                                                                               |
| 7c00029  | 0.10707 | ni     | hypothetical protein                                                 | um04943   | 0.02207 | ni     | conserved hypothetical protein                                                                                     |
| 16d00056 | 0.10725 | ni     | hypothetical protein                                                 | um06478   | 0.02209 | ni     | conserved hypothetical protein                                                                                     |
| 7d00028  | 0.10742 | ni     | amine oxidase                                                        | um01189   | 0.02216 | K03232 | probable EFB1 - translation elongation factor eEF1beta                                                             |
| 16d00071 | 0.10743 | K00963 | UDP-glucose pyrophosphorylase                                        | um10319   | 0.02218 | ni     | putative protein                                                                                                   |
| 12c00099 | 0.10749 | ni     | hypothetical protein                                                 | um06222   | 0.02219 | K14654 | related to RUB7 - HTP reductase                                                                                    |
| 7d00280  | 0.10782 | ni     | nuclear receptor coregulator SMRT/SMRTER                             | um03085   | 0.02225 | K04564 | probable manganese superoxide dismutase precursor                                                                  |
| 9c00287  | 0.10786 | K03521 | electron transfer flavoprotein, beta subunit                         | um02495   | 0.02226 | K03039 | related to 26S proteasome regulatory particle chain RPN9                                                           |
| 6c00050  | 0.10816 | ni     | hypothetical protein                                                 | um05911   | 0.0223  | ni     | conserved hypothetical protein                                                                                     |
| 16c00075 | 0.10838 | ni     | hypothetical protein                                                 | um01689   | 0.0223  | ni     | putative protein                                                                                                   |
| 16c00010 | 0.10839 | K12346 | mn2+ and Fe2+ transporters of the NRAMP family                       | um02223   | 0.02233 | K10178 | related to acid phosphatase                                                                                        |
| 12c00054 | 0.10851 | K12870 | mRNA splicing factor                                                 | um06091   | 0.02234 | ni     | ni                                                                                                                 |
| 15c00037 | 0.1086  | ni     | hypothetical protein                                                 | um11248   | 0.02241 | ni     | conserved hypothetical protein                                                                                     |
| 18c00024 | 0.10861 | K14549 | conserved WD40 repeat-containing protein                             | um05545   | 0.02248 | K11427 | related to protein-lysine N-methyltransferase                                                                      |
| 18d00056 | 0.1087  | ni     | hypothetical protein                                                 | um06268   | 0.02249 | ni     | related to CCO-17-cisposed vacuolar iron transport protein                                                         |
| 10c00051 | 0.10871 | ni     | betaine aldehyde repeat-containing protein                           | um04781   | 0.02265 | K11096 | probable small nuclear ribonucleoprotein chain D2                                                                  |
| 9d00159  | 0.10875 | K10734 | uncharacterized conserved protein                                    | um11541   | 0.02277 | K17338 | conserved hypothetical protein                                                                                     |
| 14c00095 | 0.10878 | K14007 | vesicle coat complex COPII, subunit SEC24/subunit SFB2               | um10332   | 0.02279 | ni     | conserved hypothetical protein                                                                                     |
| 24c00061 | 0.10881 | ni     | hypothetical protein                                                 | um10061   | 0.02285 | ni     | conserved hypothetical protein                                                                                     |
| 18c00063 | 0.10891 | K01568 | thiamine pyrophosphate-requiring enzyme                              | um02472   | 0.02304 | ni     | conserved hypothetical protein                                                                                     |
| 8d00069  | 0.10922 | K12393 | adaptor complexes medium subunit family                              | um00208   | 0.02307 | ni     | related to SRC1 - involved in sister chromatid segregation                                                         |
| 20c00111 | 0.10922 | K01279 | hypothetical protein                                                 | um12034   | 0.02307 | K12158 | probable NEDD8 precursor - Ubiquitin-like protein                                                                  |
| 13d00056 | 0.1097  | ni     | HMG box-containing protein                                           | um02331   | 0.02307 | K04371 | MAP Kinase                                                                                                         |
| 10d0035  | 0.10985 | K03264 | transcription initiation factor 6                                    | um03184   | 0.02315 | ni     | conserved hypothetical protein                                                                                     |
| 26d00020 | 0.10992 | K03564 | alkyl hydroperoxide reductase                                        | um10778   | 0.02318 | K15156 | related to RNA polymerase II mediator complex protein pmc1                                                         |
| 5c00087  | 0.10998 | K09506 | molecular chaperone                                                  | um00812   | 0.0232  | K11788 | probable bifunctional purine biosynthetic protein ade1                                                             |
| 26d00070 | 0.11005 | K12816 | mRNA splicing factor                                                 | um11637   | 0.02321 | ni     | conserved hypothetical protein                                                                                     |
| 26c00014 | 0.11008 | K12191 | vacuolar assembly/sorting protein DID4                               | um01329   | 0.02322 | K00030 | probable IDH1 - isocitrate dehydrogenase                                                                           |
| 7c00350  | 0.11009 | ni     | hypothetical protein                                                 | um11032   | 0.02325 | ni     | conserved hypothetical protein                                                                                     |
| 22c00184 | 0.11016 | ni     | hypothetical protein                                                 | um01967   | 0.02325 | ni     | conserved hypothetical protein                                                                                     |
| 9d00249  | 0.11019 | ni     | hypothetical protein                                                 | um01903   | 0.02339 | ni     | related to succinyl-coa ligase                                                                                     |
| 14d00034 | 0.11022 | ni     | uncharacterized conserved protein                                    | um10922   | 0.02341 | ni     | conserved hypothetical protein                                                                                     |
| 25d00062 | 0.11023 | ni     | hypothetical protein                                                 | um04323   | 0.02357 | ni     | conserved hypothetical protein                                                                                     |
| 5c00149  | 0.11026 | ni     | hypothetical protein                                                 | um03412   | 0.02359 | ni     | conserved hypothetical protein                                                                                     |
| 3a00031  | 0.11037 | K12812 | ATP-dependent RNA helicase                                           | um04997   | 0.02364 | ni     | related to SUV3 - ATP-dependent RNA helicase                                                                       |
| 4d00035  | 0.11046 | K03025 | RNA polymerase III, subunit C34                                      | um03266   | 0.02367 | ni     | conserved hypothetical protein                                                                                     |
| 19d00143 | 0.1105  | K14290 | nuclear transport receptor CRM1/MSNS                                 | um06009   | 0.02371 | K05658 | probable Leptomycin B resistance protein pmf1                                                                      |
| 9c00228  | 0.11109 | K11251 | SAM-dependent methyltransferases                                     | um02573   | 0.02372 | ni     | hypothetical protein                                                                                               |
| 27c00001 | 0.11109 | ni     | hypothetical protein                                                 | um05393   | 0.02372 | ni     | ni                                                                                                                 |
| 25c00042 | 0.11127 | K01173 | mitochondrial endonuclease                                           | um02291   | 0.02378 | K00681 | related to gamma-glutamyltransferase                                                                               |
| 9c00288  | 0.11131 | ni     | Ca2+ sensor                                                          | um04466   | 0.02386 | ni     | related to NADPH-dependent beta-ketoacyl reductase                                                                 |
| 12c00096 | 0.11159 | ni     | hypothetical protein                                                 | um11597   | 0.02401 | ni     | hypothetical protein                                                                                               |
| 22d00139 | 0.11184 | ni     | phosphoglucomutase                                                   | um02884   | 0.02405 | ni     | conserved hypothetical protein                                                                                     |
| 10c0043  | 0.11185 | ni     | protein kinase C substrate, 80 KD protein, heavy chain               | um01979   | 0.02419 | ni     | related to MTO2 - Putative S-adenosylmethionine-dependent methyltransferase                                        |
| 10d00210 | 0.11245 | ni     | hypothetical protein                                                 | um04010   | 0.02444 | K15745 | probable phytoene dehydrogenase                                                                                    |
| 16c00001 | 0.11246 | ni     | non-ribosomal peptide synthetase                                     | um10477   | 0.02458 | K12842 | conserved hypothetical protein                                                                                     |
| 25d00032 | 0.11261 | ni     | hypothetical protein                                                 | um12185   | 0.0246  | ni     | conserved hypothetical protein                                                                                     |
| 15d00074 | 0.11255 | ni     | dephosphoryl aminopeptidase                                          | um02557   | 0.02461 | K02321 | related to DNA polymerase alpha 70 kDa subunit                                                                     |
| 7d00171  | 0.11278 | K01619 | deoxyribose-phosphate aldolase                                       | um11413   | 0.02469 | ni     | putative protein                                                                                                   |
| 14d00084 | 0.11303 | ni     | P-type ATPase                                                        | um02366   | 0.02471 | K03109 | related to signal recognition particle 9 protein                                                                   |
| 7d00144  | 0.11313 | K06943 | GTP-binding protein CRFG/NOG1                                        | um11033   | 0.02476 | ni     | related to 2-hydroxyacid dehydrogenase                                                                             |
| 19d00144 | 0.11314 | ni     |                                                                      |           |         |        |                                                                                                                    |

|           |         |        |                                                                |           |         |        |                                                                             |
|-----------|---------|--------|----------------------------------------------------------------|-----------|---------|--------|-----------------------------------------------------------------------------|
| 11d00068  | 0.11682 | ni     | protein tyrosine phosphatase                                   | um01128   | 0.02578 | K11341 | related to YAF9 - Component of a chromatin modifying complex                |
| 15c00039  | 0.11683 | ni     | predicted Zn-dependent hydrolase                               | um00796   | 0.02587 | ni     | putative protein                                                            |
| 27c00037  | 0.11707 | ni     | hypothetical protein                                           | um01237   | 0.02588 | ni     | conserved hypothetical Ustilago-specific protein                            |
| 14c00054  | 0.11716 | ni     | hypothetical protein                                           | um01702   | 0.02588 | ni     | conserved hypothetical protein                                              |
| 7400286   | 0.11766 | ni     | uncharacterized Zn ribbon-containing protein                   | um10544   | 0.02591 | ni     | conserved hypothetical protein                                              |
| 22d00255  | 0.11788 | ni     | predicted hydrolases or acyltransferases                       | um04442   | 0.02609 | K01893 | probable DEDB1 - asparaginyl-RNA-synthetase                                 |
| 9c000025  | 0.11806 | K09780 | hypothetical protein                                           | um02104.2 | 0.02613 | ni     | probable Regulator of G-Protein Signaling Protein                           |
| 22c00022  | 0.11823 | K12820 | predicted component of NuA3 histone acetyltransferase complex  | um01864   | 0.02614 | K15340 | conserved hypothetical protein                                              |
| 70c00204  | 0.11825 | ni     | mRNA splicing factor ATP-dependent RNA helicase                | um11522   | 0.02616 | ni     | putative protein                                                            |
| 16d00062  | 0.11826 | K01120 | 60S ribosomal protein L14/L17/L23                              | um10311   | 0.02617 | ni     | putative protein                                                            |
| 15c00072  | 0.11831 | K04460 | hypothetical protein                                           | um12328   | 0.02637 | ni     | conserved hypothetical Ustilago-specific protein                            |
| 12d00072  | 0.11836 | K11855 | serine-threonine phosphatase-2A, catalytic subunit             | um10101   | 0.02653 | ni     | hypothetical protein                                                        |
| 7c00267   | 0.11837 | ni     | ubiquitin carboxyl-terminal hydrolase                          | um01168   | 0.02663 | ni     | conserved hypothetical protein                                              |
| 18d00018  | 0.11877 | K01876 | hypothetical protein                                           | um10749   | 0.02668 | K00728 | probable dolichyl-phosphate-mannose-6-phospho-1-mannosyltransferase         |
| 70c0291   | 0.11965 | K00416 | asparnyl-trna synthetase                                       | um06213   | 0.02676 | ni     | conserved hypothetical protein                                              |
| 22c00193  | 0.11986 | ni     | hypothetical protein                                           | um01547   | 0.02677 | ni     | conserved hypothetical protein                                              |
| 22c00130  | 0.12012 | ni     | hypothetical protein                                           | um04977   | 0.02684 | ni     | putative protein                                                            |
| 7400003   | 0.12017 | ni     | hypothetical protein                                           | um11641   | 0.02685 | ni     | conserved hypothetical protein                                              |
| 40d00022  | 0.12019 | ni     | hypothetical protein                                           | um03974   | 0.02687 | K14152 | probable histidine biosynthesis trifunctional protein                       |
| 26c00071  | 0.12028 | K14852 | regulator of ribosome synthesis                                | um10364   | 0.02691 | ni     | related to KRE6 - glucan synthase subunit                                   |
| 6c000071  | 0.12039 | ni     | hypothetical protein                                           | um11914   | 0.02694 | K02983 | probable 40S ribosomal protein S30                                          |
| 3a000052  | 0.12051 | ni     | hypothetical protein                                           | um00673   | 0.027   | ni     | probable het-c2 protein                                                     |
| 3c000073  | 0.12066 | ni     | hypothetical protein                                           | um00053   | 0.02713 | K03786 | probable 3-dehydroquinate dehydratase                                       |
| 5a000087  | 0.1209  | ni     | protein interacting with poly(A)-binding protein               | um01773   | 0.0272  | ni     | conserved hypothetical protein                                              |
| 1c000018  | 0.12098 | ni     | hypothetical protein                                           | um03013   | 0.02729 | K03255 | related to CU11 - translation initiation factor eIF3                        |
| 7400105   | 0.12141 | ni     | hypothetical protein                                           | um06258   | 0.02733 | ni     | conserved hypothetical protein                                              |
| 7c00302   | 0.12144 | K07976 | GTPase Rab5/YPT51                                              | um02802   | 0.02733 | ni     | related to NAR1 - similarity to human nuclear prelamin A recognition factor |
| 4c000001  | 0.12179 | ni     | hypothetical protein                                           | um04162   | 0.02737 | ni     | related to mitochondrial amino acid transporter ARG-13                      |
| 20d00022  | 0.1219  | ni     | hypothetical protein                                           | um00226   | 0.02739 | K11364 | conserved hypothetical protein                                              |
| 26c00075  | 0.12293 | ni     | hypothetical protein                                           | 0.0274    | K03800  | ni     | related to lipovitelliferase                                                |
| 14d000004 | 0.12236 | K00616 | transaldolase                                                  | um11376   | 0.0275  | ni     | putative protein                                                            |
| 13c00062  | 0.12247 | K01568 | thiamine pyrophosphate-requiring enzyme                        | um10635   | 0.02759 | ni     | hypothetical protein                                                        |
| 8c000009  | 0.12255 | ni     | hypothetical protein                                           | um03180   | 0.02763 | ni     | related to white collar 1 protein                                           |
| 12c00102  | 0.1226  | K03348 | anaphase-promoting complex (APC), subunit 1                    | um11520   | 0.02763 | K02150 | probable vacuolar ATP synthase subunit E                                    |
| 11c000074 | 0.12309 | K01893 | asparaginyl-trna synthetase                                    | um12318   | 0.02764 | ni     | hypothetical protein                                                        |
| 26d00081  | 0.12314 | ni     | hypothetical protein                                           | um02290   | 0.02769 | ni     | conserved hypothetical protein                                              |
| 27d00007  | 0.12314 | ni     | glyoxylate oxidase                                             | um02654   | 0.02774 | ni     | conserved hypothetical protein                                              |
| 20d00021  | 0.12326 | K10686 | NEDD8-activating complex, catalytic component UBA3             | um02520   | 0.02783 | K15206 | related to TIF1C subunit                                                    |
| 7400198   | 0.12347 | ni     | hypothetical protein                                           | um01869   | 0.02785 | ni     | conserved hypothetical protein                                              |
| 9c00355   | 0.12361 | ni     | hypothetical protein                                           | um02199   | 0.02792 | ni     | hypothetical protein                                                        |
| 22d00290  | 0.12379 | ni     | hypothetical protein                                           | um03292   | 0.02803 | K11979 | related to Protein mto2                                                     |
| 27d00068  | 0.12383 | ni     | hypothetical protein                                           | um03144   | 0.02807 | K11826 | probable clathrin-associated adaptor complex medium chain                   |
| 26c00042  | 0.12386 | K03023 | RNA telomerase II (C) subunit                                  | um12150   | 0.02816 | ni     | related to YKT1 - SNARE protein for Endoplasmic Reticulum-Golgi transport   |
| 8c000045  | 0.12391 | ni     | hypothetical protein                                           | um11688   | 0.02821 | ni     | conserved hypothetical protein                                              |
| 22d000257 | 0.12398 | K01273 | renal dipeptidase                                              | um10091   | 0.02828 | ni     | conserved hypothetical protein                                              |
| 11c00006  | 0.12409 | ni     | predicted Kv/Hh-antiporter                                     | um10467   | 0.02831 | ni     | related to RAD16 - nucleotide excision repair protein                       |
| 5d00036   | 0.12436 | ni     | uncharacterized high-glucose-regulated protein                 | um11107   | 0.02845 | ni     | conserved hypothetical protein                                              |
| 9a000063  | 0.12448 | K00826 | branched chain aminotransferase BCAT1                          | um01540   | 0.0285  | ni     | conserved hypothetical protein                                              |
| 25c00077  | 0.12471 | ni     | ras 1 guanine nucleotide exchange factor                       | um04004   | 0.02886 | K11204 | probable gamma-glutamylcysteine synthetase                                  |
| 24d00038  | 0.12479 | K13127 | predicted E3 ubiquitin ligase                                  | um04398   | 0.02889 | ni     | related to RNA binding protein Nrd1                                         |
| 26c00087  | 0.12481 | K13107 | predicted RNA-binding protein                                  | um05349   | 0.02909 | ni     | conserved hypothetical protein                                              |
| 7c00271   | 0.12493 | ni     | calmodulin and related proteins                                | um03861   | 0.02913 | ni     | putative protein                                                            |
| 13d00074  | 0.12507 | K11676 | hypothetical protein                                           | um00572   | 0.02916 | ni     | conserved hypothetical protein                                              |
| 7c00192   | 0.12512 | K02266 | cytochrome c oxidase, subunit Vlb/COX13                        | um00768   | 0.02919 | K17267 | probable coatomer gamma-2 subunit                                           |
| 3c000038  | 0.12517 | ni     | nfl-like domain-containing proteins                            | um02247   | 0.02939 | ni     | conserved hypothetical protein                                              |
| 26d00101  | 0.1253  | K09780 | hypothetical protein                                           | um04796   | 0.02939 | ni     | hypothetical protein                                                        |
| 8c000021  | 0.12543 | K12471 | cytosolic nucleoside transporter protein                       | um02945   | 0.02945 | K13106 | conserved hypothetical protein                                              |
| 19c00084  | 0.12558 | K11564 | hypothetical protein                                           | um04969   | 0.0295  | ni     | conserved hypothetical protein                                              |
| 2c000012  | 0.1256  | K15163 | hypothetical protein                                           | um03631   | 0.02954 | ni     | related to MIA40 - mitochondrial intermembrane space protein                |
| 10c00050  | 0.12563 | K03504 | hypothetical protein                                           | um11178   | 0.02955 | ni     | related to U2 small nuclear ribonucleoprotein B                             |
| 13c00057  | 0.12597 | ni     | uncharacterized conserved protein                              | 0.02971   | K03233  | ni     | related to translation elongation factor eEF1                               |
| 22d00090  | 0.12597 | K14775 | uncharacterized conserved protein                              | um02859   | 0.0298  | K14290 | probable CRM1 - nuclear export factor                                       |
| 11d00077  | 0.12601 | ni     | hypothetical protein                                           | um11974   | 0.02981 | ni     | ni                                                                          |
| 8a000015  | 0.12621 | K16066 | predicted dehydrogenase                                        | um03537   | 0.03002 | K00611 | probable ornithine carbamoyltransferase precursor                           |
| 9a000318  | 0.12631 | ni     | ubiquitin-protein ligase                                       | um10961   | 0.03003 | K02437 | probable Glycine cleavage system H protein                                  |
| 14c00027  | 0.12645 | K10845 | hypothetical protein                                           | 0.03017   | ni      | ni     | related to positive transcription factor GCN20                              |
| 27d00096  | 0.12652 | ni     | hypothetical protein                                           | um03756   | 0.03025 | K10300 | related to DNA helicase Fdhp                                                |
| 9a000204  | 0.12655 | ni     | hypothetical protein                                           | um06259   | 0.03029 | K05864 | probable U-snrNP-associated cyclophilin                                     |
| 5c000027  | 0.12679 | ni     | hypothetical protein                                           | um04703   | 0.03035 | K01840 | probable phosphoanionomutase                                                |
| 9c00110   | 0.12705 | ni     | hypothetical protein                                           | um11300   | 0.03047 | ni     | conserved hypothetical protein                                              |
| 12d00030  | 0.1272  | ni     | hypothetical protein                                           | um00780   | 0.03047 | ni     | putative protein                                                            |
| 5c000055  | 0.12747 | K10643 | MOT2 transcription factor                                      | um02435   | 0.03048 | K01410 | related to mitochondrial intermediate peptidase precursor                   |
| 27c00070  | 0.12758 | ni     | hypothetical protein                                           | um11355   | 0.03051 | K11569 | related to DAD4 - outer kinetochore protein                                 |
| 25d00049  | 0.12759 | K01597 | mevalonate pyrophosphate decarboxylase                         | um11041.2 | 0.03053 | ni     | related to serine                                                           |
| 18d00030  | 0.12775 | ni     | ankyrin repeat and DHHC-type Zn-finger domain containing prote | um01881   | 0.03054 | K00540 | related to Oxidoreductase                                                   |
| 12c00033  | 0.12786 | ni     | hypothetical protein                                           | um02325.2 | 0.03067 | ni     | conserved hypothetical protein                                              |
| 7400279   | 0.12799 | K06689 | ubiquitin-protein ligase                                       | um02596   | 0.03074 | ni     | hypothetical protein                                                        |
| 18c00070  | 0.128   | ni     | hypothetical protein                                           | um02501   | 0.0308  | K12572 | related to Pab1 dependent poly                                              |
| 22c00047  | 0.12852 | ni     | dihydroisomerase succinyltransferase                           | um05206   | 0.03083 | K00452 | probable DNA 1, 3-hydroxyanthranilic acid dioxygenase                       |
| 3a000068  | 0.1286  | ni     | hypothetical protein                                           | um03760   | 0.03083 | ni     | related to Phosphatidylinositol-3                                           |
| 27d00010  | 0.12876 | K14306 | nuclear porin                                                  | um12282   | 0.03084 | K15028 | related to eIF3k - translation initiation factor 3 subunit K                |
| 14d00037  | 0.12895 | ni     | hypothetical protein                                           | um05694   | 0.03091 | ni     | hypothetical protein                                                        |
| 3a000059  | 0.1293  | K08286 | serine/threonine protein kinase                                | um12339   | 0.03096 | ni     | hypothetical protein                                                        |
| 9c003318  | 0.12954 | ni     | hypothetical protein                                           | um01478   | 0.03097 | K00415 | conserved hypothetical protein                                              |
| 7400040   | 0.12958 | K02946 | hypothetical protein                                           | um02300   | 0.03102 | K01176 | probable alpha-amylose                                                      |
| 22d000225 | 0.12974 | ni     | hypothetical protein                                           | um04623   | 0.03102 | K10756 | probable RFC3 - DNA replication factor C                                    |
| 25d00046  | 0.12982 | K13337 | 40 kDa frameshifted protein associated with peroxisomes        | um06038   | 0.03106 | ni     | conserved hypothetical protein                                              |
| 13d00048  | 0.12978 | ni     | hypothetical protein                                           | um04196   | 0.03108 | K12343 | steroid 5alpha-reductase                                                    |
| 11c00059  | 0.12995 | ni     | ER-Golgi vesicle-tethering protein p115                        | um04944   | 0.03111 | K14401 | related to cleavage and polyadenylation specificity factor                  |
| 6d000051  | 0.13022 | ni     | hypothetical protein                                           | um11564   | 0.03113 | ni     | hypothetical protein                                                        |
| 3a000023  | 0.13036 | K00036 | glucose-6-phosphate 1-dehydrogenase                            | um11358   | 0.0312  | K02355 | related to MEF2 - translation elongation factor                             |
| 16c00036  | 0.13046 | ni     | aldohyde dehydrogenase                                         | um01112   | 0.0315  | K03417 | related to carboxyphosphonopyruvate phosphonmutase                          |
| 21c00006  | 0.13083 | ni     | hypothetical protein                                           | um05423   | 0.03151 | ni     | related to Monooxygenase A                                                  |
| 18c00074  | 0.13066 | ni     | hypothetical protein                                           | um05746   | 0.03154 | K00685 | related to arginine-RNA-protein transferase                                 |
| 19c00059  | 0.13111 | ni     | clathrin adaptor complex, small subunit                        | um05777   | 0.03155 | ni     | conserved hypothetical protein                                              |
| 13c00034  | 0.13141 | ni     | hypothetical protein                                           | um04650   | 0.03164 | ni     | conserved hypothetical protein                                              |
| 22d00069  | 0.13205 | ni     | disposylase                                                    | um01696   | 0.0317  | ni     | conserved hypothetical protein                                              |
| 6c00136   | 0.13214 | K00565 | mRNA cap methyltransferase                                     | um11773   | 0.03172 | ni     | conserved hypothetical protein                                              |
| 14c00003  | 0.13216 | ni     | predicted transporter                                          | um11696   | 0.03176 | ni     | related to SCS2 - required for inositol metabolism                          |
| 11c00081  | 0.13219 | K04345 | cAMP-dependent protein kinase catalytic subunit                | um04290   | 0.03181 | K00698 | chiin synthase 2                                                            |
| 22c00049  | 0.13234 | ni     | permease of the major facilitator superfamily                  | um03253   | 0.03193 | ni     | putative protein                                                            |
| 9a000016  | 0.13243 | ni     | hypothetical protein                                           | um03843   | 0.03205 | K10862 | conserved hypothetical protein                                              |
| 8c000052  | 0.13245 | ni     | hypothetical protein                                           | um12051   | 0.03206 | ni     | related to Glutamate decarboxylase 1                                        |
| 14c00045  | 0.13249 | K01530 | P-type ATPase                                                  | um10875   | 0.03206 | ni     | conserved hypothetical protein                                              |
| 20c00045  | 0.13254 | ni     | hypothetical protein                                           | um06119   | 0.03207 | ni     | conserved hypothetical protein                                              |
| 3c000042  | 0.1327  | K01101 | p-Nitrophenyl phosphatase                                      | um03294   | 0.03211 | ni     | conserved hypothetical protein                                              |
| 5c000002  | 0.13281 | ni     | hypothetical protein                                           | um10060.2 | 0.03231 | ni     | related to YIH1                                                             |
| 18d00015  | 0.13287 | ni     | hypothetical protein                                           | um10196   | 0.03232 | K02901 | probable 60S large subunit ribosomal protein L27                            |
| 24d00060  | 0.13287 | ni     | hypothetical protein                                           | um04285   | 0.03233 | K01637 | probable isocitrate lyase                                                   |
| 14d00033  | 0.13306 | ni     | ribosomal protein S6 kinase and related proteins               | um12093   | 0.03257 | ni     | putative protein                                                            |
| 22c00167  | 0.13323 | ni     | hypothetical protein                                           | um15362   | 0.03261 | ni     | conserved hypothetical protein                                              |
| 5d00142   | 0.1333  | ni     | gamma-tubulin ring complex protein                             | um01012   | 0.03267 | ni     | conserved hypothetical protein                                              |
| 22d00214  | 0.13334 | ni     | hypothetical protein                                           | um00916   | 0.03275 | ni     | conserved hypothetical protein                                              |
| 70c00322  | 0.13352 | ni     | hypothetical protein                                           | um11422   | 0.03276 | ni     | conserved hypothetical protein                                              |
| 22c00085  | 0.1337  | ni     | VAMP-associated protein                                        | um05625   | 0.03285 | ni     | related to curved dna-binding protein                                       |
| 9c00149   | 0.13373 | K07739 | RNA polymerase II elongator complex, subunit ELP3              | um10588   | 0.03286 | K12613 | related to decapping enzyme                                                 |
| 25d00071  | 0.1339  | ni     | uncharacterized conserved protein                              | um10975.2 | 0.03287 | ni     | conserved hypothetical protein                                              |
| 9a000405  | 0.13416 | K15505 | helicase-like transcription factor HLTf                        | um06076   | 0.03289 | ni     | related to quinate transport protein                                        |
| 9a000154  | 0.13437 | ni     | hypothetical protein                                           | um06151   | 0.03294 | ni     | conserved hypothetical protein                                              |
| 9a000095  | 0.13442 | ni     | hypothetical protein                                           | um03209   | 0.03292 | K14007 | probable SEC24 - COP1 coated vesicle component                              |
| 5a00125   | 0.13466 | K14545 | rRNA processing protein RRP7                                   | um05546   | 0.03306 | K15109 | conserved hypothetical protein                                              |
| 7c00308   | 0.13477 | ni     | hypothetical protein                                           | um01607   | 0.0332  | ni     | related to Translin                                                         |
| 15c00047  | 0.13508 | ni     | drebins and related actin binding proteins                     | um10277.2 | 0.03321 | K00698 | chitin synthase 5                                                           |
| 22c00218  | 0.13513 | K07304 | peptide methionine sulfoxide reductase                         | um10172   | 0.03327 | K13542 | related to peroxisomal targeting signal receptor                            |
| 9c00162   | 0.13548 | K00566 | RNA (5-methylaminomethyl-2-thiouridylyl)-methyltransferase     | um11700.2 | 0.03328 | K07404 | conserved hypothetical protein                                              |
| 8c000013  | 0.13569 | ni     | molecular chaperone Prefoldin, subunit 3                       | um11047   | 0.03336 | ni     | conserved hypothetical protein                                              |
| 24d00048  | 0.13589 | K10956 | transport protein SecE1, alpha subunit                         | um10858   | 0.03337 | K03000 | probable RPA12 - 13                                                         |
| 14d00043  | 0.13623 | ni     | hypothetical protein                                           | um12324   | 0.03342 | ni     | hypothetical protein                                                        |
| 9a000055  | 0.13623 | ni     | monocarboxylate transporter                                    | um03065   | 0.03348 | ni     | hypothetical protein                                                        |
| 9c002071  | 0.13625 | ni     | diadenosine polyphosphate hydrolase and related proteins       | um10462   | 0.03351 | ni     | conserved hypothetical protein                                              |
| 9c00376   | 0.13628 | ni     | transferrin receptor and related proteins                      | um02232   | 0.03355 | ni     | putative protein                                                            |
| 9a000326  | 0.13633 | K10591 | ubiquitin protein ligase RSP5/NEDD4                            | um02477   | 0.03357 | K02264 | probable cytochrome-c oxidase chain VI precursor                            |
| 1c000051  | 0.13635 | ni     | hypothetical protein                                           | um01928   | 0.03363 | ni     | putative protein                                                            |
| 15c00050  | 0.13652 | ni     | hypothetical protein                                           | um05992   | 0.03367 | ni     | related to ENT3 - cytoskeletal adaptor                                      |
| 5a00029   | 0.13671 | ni     | hypothetical protein                                           | um00407   | 0.03367 | ni     | probable Tartrate dehydrogenase                                             |
| 2c000037  | 0.13674 | K14297 | nuclear pore complex, Nup98 component                          | um01115   | 0       |        |                                                                             |

|          |         |        |                                                                  |           |         |        |                                                                                                                 |
|----------|---------|--------|------------------------------------------------------------------|-----------|---------|--------|-----------------------------------------------------------------------------------------------------------------|
| 15d00055 | 0.13939 | K03015 | DNA-directed RNA polymerase subunit E'                           | um04173   | 0.03536 | K05236 | probable COP1 - coatomer complex alpha chain of secretory pathway vesicles                                      |
| 7400177  | 0.13941 | ni     | hypothetical protein                                             | um03914   | 0.03542 | ni     | related to Lactaldehyde reductase                                                                               |
| 14c00046 | 0.13951 | K11979 | uncharacterized conserved protein                                | um12005   | 0.03545 | K02737 | probable PRE2 - 20S core proteasome subunit                                                                     |
| 15d00045 | 0.13924 | ni     | methytransferase                                                 | um03555   | 0.03555 | K08336 | probable Autocytin-related protein 12                                                                           |
| 19c00087 | 0.13978 | K01487 | atrazine chlorohydrolase                                         | um04529   | 0.03555 | K02320 | related to POL1 - DNA-directed DNA polymerase alpha                                                             |
| 19c00107 | 0.13986 | ni     | predicted cell surface protein homologous to bacterial outer mem | um02162   | 0.03551 | ni     | conserved hypothetical protein                                                                                  |
| 26d00001 | 0.14002 | ni     | synaptic vesicle transporter SVOP and related transporters       | um06188   | 0.03556 | K03178 | probable UBA1 - ubiquitin-protein ligase                                                                        |
| 19c00001 | 0.14022 | ni     | hypothetical protein                                             | um00933   | 0.03573 | ni     | probable thiamine biosynthesis protein nmt1                                                                     |
| 3000014  | 0.14022 | K00133 | aspartate-semialdehyde dehydrogenase                             | um00333   | 0.03598 | ni     | conserved hypothetical protein                                                                                  |
| 3400027  | 0.14025 | ni     | hypothetical protein                                             | um02324   | 0.03598 | K03008 | related to DNA-directed RNA polymerase 13                                                                       |
| 19c00066 | 0.14038 | ni     | 2-oxoyl-CoA hydratase                                            | um03958   | 0.03598 | K01663 | probable HIST - glutamine amidotransferase                                                                      |
| 7c000295 | 0.1405  | ni     | hypothetical protein                                             | um05146   | 0.03607 | ni     | putative protein                                                                                                |
| 7c000290 | 0.14053 | ni     | hypothetical protein                                             | um03303   | 0.03614 | K16572 | related to gamma-tubulin complex component 5                                                                    |
| 9c00261  | 0.1406  | ni     | hypothetical protein                                             | um10008   | 0.03618 | ni     | conserved hypothetical protein                                                                                  |
| 8c00123  | 0.1409  | K03782 | hypothetical protein                                             | um04902   | 0.03619 | K02202 | probable KIN28 - cyclin-dependent ser                                                                           |
| 9c00068  | 0.14101 | ni     | hypothetical protein                                             | um11757.2 | 0.0363  | ni     | conserved hypothetical protein                                                                                  |
| 13c00027 | 0.14102 | K03364 | anaphase promoting complex, Cdc20, Cdh1, and Ama1 subunits       | um03807   | 0.03632 | K13830 | probable ARC1 - Pentafunctional AROM polypeptide                                                                |
| 7400274  | 0.14144 | ni     | hypothetical protein                                             | um05225   | 0.03638 | ni     | conserved hypothetical protein                                                                                  |
| 26d00069 | 0.14169 | K14779 | ATP-dependent RNA helicase                                       | um10849   | 0.03667 | ni     | putative protein                                                                                                |
| 5c00139  | 0.14169 | ni     | uncharacterized conserved protein                                | um12337   | 0.0367  | K17361 | related to acyl-coa thioester hydrolase                                                                         |
| 6d00056  | 0.14186 | ni     | hypothetical protein                                             | um01312   | 0.03672 | ni     | related to Vacuolar assembly protein VPS41                                                                      |
| 19c00122 | 0.14191 | K07160 | hypothetical protein                                             | um01646   | 0.03682 | K02212 | probable replication licensing factor MCM4                                                                      |
| 20c00032 | 0.14207 | ni     | NIPSNAP1 protein                                                 | um04799   | 0.03699 | K14294 | conserved hypothetical protein                                                                                  |
| 11c00022 | 0.14209 | K03380 | monooxygenase                                                    | um01170   | 0.03703 | ni     | conserved hypothetical protein                                                                                  |
| 25c00067 | 0.14223 | ni     | hypothetical protein                                             | um11835   | 0.03721 | ni     | conserved hypothetical protein                                                                                  |
| 13c00064 | 0.14235 | ni     | hypothetical protein                                             | um03249   | 0.0373  | ni     | ni                                                                                                              |
| 5000042  | 0.14239 | ni     | cyclin                                                           | um12184   | 0.03731 | ni     | conserved hypothetical protein                                                                                  |
| 7c00039  | 0.1424  | K17413 | mitochondrial ribosomal protein S28                              | um05590   | 0.03731 | ni     | related to NAD                                                                                                  |
| 7400188  | 0.14262 | ni     | cell cycle control protein                                       | um10435   | 0.03741 | K14319 | probable ran GTPase activating protein 1                                                                        |
| 13c00039 | 0.1428  | K01288 | serine carboxypeptidases                                         | um10840   | 0.03743 | K02288 | probable MIS1 - C1-tetrahydrofolate synthase                                                                    |
| 9c000232 | 0.1384  | ni     | hypothetical protein                                             | um03743   | 0.03743 | K02627 | related to TDB - Component of small nuclear ribonucleoprotein complexes involved in RNA processing and splicing |
| 22d00103 | 0.14389 | K02976 | 40s ribosomal protein S27                                        | um05861   | 0.03756 | K05909 | related to FET5 - multicopper oxidase                                                                           |
| 18d00028 | 0.14417 | K09184 | GATA-4/5/6 transcription factors                                 | um00202   | 0.03757 | K00490 | related to Cytochrome P450 4F8                                                                                  |
| 10d00099 | 0.14428 | ni     | iron/sulfur cluster family oxidoreductases                       | um03963   | 0.03763 | ni     | nuclear pore membrane protein                                                                                   |
| 4c00039  | 0.14434 | ni     | phosphotyrosine kinase gamma subunit                             | um05232   | 0.03765 | ni     | related to flavin-containing monooxygenase                                                                      |
| 7c00086  | 0.14436 | K13989 | predicted membrane protein                                       | um03343   | 0.03766 | ni     | putative protein                                                                                                |
| 12c00072 | 0.14436 | ni     | protein phosphatase 2C                                           | um10693   | 0.03797 | ni     | conserved hypothetical protein                                                                                  |
| 6d00032  | 0.1444  | ni     | hypothetical protein                                             | um00995   | 0.038   | K11566 | conserved hypothetical protein                                                                                  |
| 22d00215 | 0.14463 | ni     | inorganic phosphate transporter                                  | um04573   | 0.03801 | K11128 | probable nuclear RNA processing protein GAR1                                                                    |
| 11d00026 | 0.14471 | ni     | hypothetical protein                                             | um00842   | 0.0381  | ni     | conserved hypothetical protein                                                                                  |
| 9c00281  | 0.14511 | K02735 | 20S proteasome, regulatory subunit beta type PSMB3/PUP3          | um10844   | 0.03813 | ni     | conserved hypothetical protein                                                                                  |
| 9c00291  | 0.14524 | K01069 | glyoxylase                                                       | um00418   | 0.03816 | ni     | probable xylitol dehydrogenase                                                                                  |
| 9c00386  | 0.14562 | ni     | hypothetical protein                                             | um06389   | 0.03821 | ni     | conserved hypothetical protein                                                                                  |
| 6c00059  | 0.14568 | ni     | reductases with broad range of substrate specificities           | um04332.2 | 0.03822 | K06316 | related to nuclear division protein Rtt1                                                                        |
| 20d0023  | 0.14592 | ni     | hypothetical protein                                             | um06396   | 0.0383  | ni     | putative protein                                                                                                |
| 7c00274  | 0.14614 | ni     | nucleoside phosphatase                                           | um05740   | 0.03834 | K01687 | probable LLV3 - dihydroxy-acid dehydratase                                                                      |
| 7c00268  | 0.14658 | K10685 | SMT3/SUMO-activating complex, catalytic component UBA2           | um04512   | 0.03838 | ni     | related to DnaJ protein                                                                                         |
| 14d00012 | 0.14659 | K14544 | nuclear RNA-associated protein                                   | um01462   | 0.03841 | ni     | hypothetical protein                                                                                            |
| 5d00134  | 0.14669 | ni     | hypothetical protein                                             | um02134   | 0.0385  | ni     | related to mixed-linked glucanase precursor MLG1                                                                |
| 13c00088 | 0.14674 | ni     | hypothetical protein                                             | um03232   | 0.03852 | ni     | conserved hypothetical Ustilago-specific protein                                                                |
| 7c00035  | 0.14688 | K07750 | C-4 sterol methyl oxidase                                        | um11981   | 0.03853 | ni     | putative protein                                                                                                |
| 6c00061  | 0.14691 | ni     | RNA pseudouridylylase                                            | um00060   | 0.03867 | ni     | conserved hypothetical Ustilago-specific protein                                                                |
| 9c00082  | 0.14703 | ni     | hypothetical protein                                             | um05242   | 0.03869 | ni     | ni                                                                                                              |
| 7400012  | 0.14701 | ni     | hypothetical protein                                             | um02797   | 0.03871 | ni     | conserved hypothetical protein                                                                                  |
| 9c00230  | 0.1473  | ni     | hypothetical protein                                             | um15088   | 0.03891 | ni     | conserved hypothetical protein                                                                                  |
| 20c00008 | 0.14732 | K03305 | H+-oligopeptide symporter                                        | um10634   | 0.03892 | ni     | conserved hypothetical protein                                                                                  |
| 14c00018 | 0.14761 | K13103 | tubulin-interacting protein TIP39                                | um00400   | 0.03898 | K06101 | conserved hypothetical protein                                                                                  |
| 7400145  | 0.14762 | ni     | hypothetical protein                                             | um05415   | 0.039   | K09527 | related to tetraoctapeptide repeat protein 2                                                                    |
| 14d00042 | 0.14812 | K01803 | triosephosphate isomerase                                        | um01279   | 0.03906 | K09493 | probable TCP1 - component of chaperonin-containing T-complex                                                    |
| 22d00115 | 0.14824 | ni     | hypothetical protein                                             | um01934   | 0.03908 | K09829 | C-8 sterol isomerase                                                                                            |
| 2c00085  | 0.1485  | K12828 | splicing factor 3b, subunit 1                                    | um12133   | 0.03917 | ni     | conserved hypothetical protein                                                                                  |
| 13c00079 | 0.14859 | ni     | hypothetical protein                                             | um10597   | 0.03918 | ni     | conserved hypothetical Ustilago-specific protein                                                                |
| 14c00090 | 0.14865 | ni     | chromatin remodeling complex SWI/SNF, component SWI2             | um05825   | 0.03921 | K07300 | probable VCX1 - Vacuolar Ca                                                                                     |
| 19d00079 | 0.1489  | ni     | ribonuclease inhibitor type leucine-rich repeat proteins         | um10880   | 0.03923 | ni     | related to Graves disease carrier protein                                                                       |
| 7400123  | 0.14903 | ni     | hypothetical protein                                             | um11515   | 0.0393  | ni     | putative protein                                                                                                |
| 22d00209 | 0.14916 | ni     | mitochondrial carrier protein PET8                               | um03553   | 0.03934 | ni     | putative protein                                                                                                |
| 5c00044  | 0.14916 | ni     | hypothetical protein                                             | um12208   | 0.03942 | K06675 | related to SMC4 - Stable Maintenance of Chromosomes                                                             |
| 19c00036 | 0.14942 | ni     | ER to golgi transport protein                                    | um05894   | 0.03944 | ni     | conserved hypothetical protein                                                                                  |
| 26d00072 | 0.14944 | K00101 | glyoxylate oxidase                                               | um01941   | 0.03945 | ni     | conserved hypothetical protein                                                                                  |
| 6d00062  | 0.14957 | ni     | hypothetical protein                                             | um03333   | 0.03947 | ni     | conserved hypothetical protein                                                                                  |
| 14c00119 | 0.14991 | K13344 | peroxisomal beta-oxidation protein peroxin                       | um03729   | 0.03954 | K13950 | related to para-aminobenzoic acid synthetase                                                                    |
| 22c00014 | 0.14963 | ni     | hypothetical protein                                             | um01116   | 0.03955 | ni     | conserved hypothetical protein                                                                                  |
| 24c00058 | 0.14998 | K01144 | oxysterol-binding protein                                        | um05069   | 0.03959 | ni     | related to short-chain dehydrogenase                                                                            |
| 19d00123 | 0.15014 | K03956 | hypothetical protein                                             | um05192   | 0.03966 | ni     | conserved hypothetical protein                                                                                  |
| 18d00063 | 0.15033 | ni     | hypothetical protein                                             | um01653   | 0.03989 | ni     | related to VPS73 - protein involved in vacuolar protein sorting                                                 |
| 15c00016 | 0.15038 | K03648 | uncial DNA glycosylase                                           | um02388   | 0.03989 | K05754 | related to subunit 1 of the Apg2                                                                                |
| 7c00034  | 0.15065 | K12177 | COP9 signalosome, subunit CSN3                                   | um04005   | 0.03993 | ni     | conserved hypothetical protein                                                                                  |
| 7c00245  | 0.15078 | K13123 | predicted RNA binding protein                                    | um02635   | 0.04004 | ni     | conserved hypothetical protein                                                                                  |
| 7c00234  | 0.15082 | ni     | hypothetical protein                                             | um10440.2 | 0.04006 | K01772 | related to HEM15 - ferrochelatase precursor                                                                     |
| 7c00023  | 0.15085 | K01866 | putative protein                                                 | um10050   | 0.04012 | ni     | putative protein                                                                                                |
| 9c00030  | 0.15088 | ni     | hypothetical protein                                             | um11557   | 0.04015 | ni     | related to YJU2 - Essential nuclear protein                                                                     |
| 11c00038 | 0.15105 | K13344 | uncharacterized AROM protein                                     | um12199   | 0.04018 | ni     | related to decapping enzyme                                                                                     |
| 7c00255  | 0.15121 | ni     | hypothetical protein                                             | um03465   | 0.04021 | K01288 | related to KEX1 protein precursor                                                                               |
| 8c00027  | 0.15147 | K13830 | pentafunctional AROM protein                                     | um11899   | 0.04027 | ni     | conserved hypothetical protein                                                                                  |
| 19d00138 | 0.15147 | ni     | hypothetical protein                                             | um05798   | 0.04038 | ni     | hypothetical protein                                                                                            |
| 11c00071 | 0.15159 | ni     | molecular chaperones HSP70/HSC70                                 | um10019   | 0.04047 | K03639 | related to Molybdopterin biosynthesis CNX2 protein                                                              |
| 16c00007 | 0.15168 | K01607 | hypothetical protein                                             | um00141   | 0.04067 | K11563 | hypothetical protein                                                                                            |
| 22d00086 | 0.15171 | ni     | hypothetical protein                                             | um03495   | 0.04067 | K11894 | probable PNO1 protein                                                                                           |
| 9c00075  | 0.15193 | ni     | amidases                                                         | um06156   | 0.04083 | K03018 | probable FPO31 - DNA-directed RNA polymerase III                                                                |
| 19d00015 | 0.15201 | K00002 | aldoketo reductase family proteins                               | um05770   | 0.04086 | K06628 | TS2D protein                                                                                                    |
| 24c00056 | 0.15238 | ni     | phosphatidylinositol-4-phosphate 5-kinase                        | um11174   | 0.04088 | ni     | conserved hypothetical protein                                                                                  |
| 5c00078  | 0.1524  | ni     | predicted regulator of the ubiquitin pathway                     | um01402   | 0.04093 | K01736 | probable ARO2 - chorismate synthase                                                                             |
| 22c00277 | 0.15255 | K14022 | hypothetical protein                                             | um06174   | 0.04098 | ni     | related to VEH1 - steryl ester hydrolase                                                                        |
| 26d00010 | 0.15276 | ni     | uncharacterized conserved protein                                | um10095   | 0.04104 | K12823 | probable RNA helicase dhp2                                                                                      |
| 18c00053 | 0.15283 | ni     | HGG motif-containing thioesterase                                | um04277   | 0.04114 | K00670 | probable N-acetyltransferase 5                                                                                  |
| 15c00051 | 0.15283 | ni     | hypothetical protein                                             | um04417   | 0.04118 | ni     | probable CRN1 - a coronin                                                                                       |
| 8c00020  | 0.15289 | K13341 | peroxisomal targeting signal type 2 receptor                     | um10576   | 0.04127 | ni     | related to SWI14 - Tyrosine phosphatase involved in actin filament organization                                 |
| 5d00083  | 0.1531  | K12817 | U5 snRNP-associated RNA splicing factor                          | um12302   | 0.04138 | ni     | conserved hypothetical protein                                                                                  |
| 25d00050 | 0.15358 | K11232 | two-component phosphorelay intermediate                          | um06261.2 | 0.04158 | K13535 | conserved hypothetical protein                                                                                  |
| 11d00020 | 0.15358 | K06100 | mRNA cleavage and polyadenylation factor II complex, subunit P   | um03642   | 0.0416  | ni     | conserved hypothetical protein                                                                                  |
| 10c00003 | 0.15365 | ni     | FOG, LIM domain                                                  | um10814   | 0.04164 | ni     | conserved hypothetical protein                                                                                  |
| 19c00143 | 0.15367 | ni     | dTPD-glucose 4-6-dehydratase                                     | um02723.2 | 0.04177 | ni     | probable mfs-mulidrug-resistance transporter                                                                    |
| 19c00023 | 0.15391 | ni     | hypothetical protein                                             | um01162   | 0.04184 | ni     | related to golgi-specific proteinin a-resistance guanine nucleotide exchange factor 1                           |
| 7c00228  | 0.15404 | ni     | hypothetical protein                                             | um11771   | 0.04198 | K07441 | conserved hypothetical protein                                                                                  |
| 6d00015  | 0.15432 | ni     | hypothetical protein                                             | um11698   | 0.04198 | K02147 | probable VMA2 - H-ATPase V1 domain 60 KD subunit                                                                |
| 11c00050 | 0.15436 | K15100 | mitochondrial tricarboxylate/dicarboxylate carrier proteins      | um05426   | 0.04211 | ni     | conserved hypothetical Ustilago-specific protein                                                                |
| 16c00040 | 0.1543  | ni     | hypothetical protein                                             | um11802   | 0.04217 | K13661 | probable TFP11 - H-ATPase 23 KD subunit                                                                         |
| 9c00155  | 0.1547  | ni     | RNA-binding protein                                              | um00963   | 0.0423  | K11121 | related to HST1 - silencing protein                                                                             |
| 12c00029 | 0.1547  | K03671 | thioesterin                                                      | um10926   | 0.04234 | K02145 | probable TFP1p - H-ATPase V1 domain 69 KD catalytic subunit                                                     |
| 3c00077  | 0.15473 | ni     | uncharacterized conserved protein                                | um00875   | 0.04237 | ni     | hypothetical protein                                                                                            |
| 9c00183  | 0.15493 | ni     | hypothetical protein                                             | um01662   | 0.04245 | K11229 | related to BCK1 ser                                                                                             |
| 22c00063 | 0.15498 | ni     | hypothetical protein                                             | um04560   | 0.04245 | ni     | putative protein                                                                                                |
| 9c00280  | 0.15507 | K02735 | 20S proteasome, regulatory subunit beta type PSMB3/PUP3          | um10159   | 0.04255 | ni     | related to transcription activator amyR                                                                         |
| 9c00308  | 0.15515 | ni     | ypf1ab GTPase activating protein                                 | um00558   | 0.04279 | ni     | conserved hypothetical Ustilago-specific protein                                                                |
| 22c00261 | 0.1552  | ni     | hypothetical protein                                             | um12219   | 0.04281 | ni     | conserved hypothetical protein                                                                                  |
| 12c00147 | 0.1553  | ni     | hypothetical protein                                             | um03526   | 0.04282 | ni     | probable neutral amino acid permease                                                                            |
| 5d00103  | 0.15545 | ni     | vacuolar sorting protein VPS33/sp1                               | um11277   | 0.04297 | ni     | conserved hypothetical protein                                                                                  |
| 12d00138 | 0.15545 | ni     | arylcacetamide deacetylase                                       | um03529   | 0.04312 | K02906 | related to MRPL9 - mitochondrial ribosomal protein                                                              |
| 26d00037 | 0.15547 | ni     | karyophilin (importin) alpha                                     | um02476   | 0.04322 | ni     | related to coatomer delta subunit                                                                               |
| 25c00007 | 0.15555 | ni     | predicted transporter                                            | um06302   | 0.04328 | ni     | putative protein                                                                                                |
| 13d00057 | 0.15567 | ni     | hypothetical protein                                             | um00635   | 0.04334 | ni     | conserved hypothetical protein                                                                                  |
| 6c00038  | 0.15575 | K01738 | cysteine synthase                                                | um02179   |         |        |                                                                                                                 |

|          |         |        |                                                                                               |           |         |        |                                                                                                             |
|----------|---------|--------|-----------------------------------------------------------------------------------------------|-----------|---------|--------|-------------------------------------------------------------------------------------------------------------|
| 8c00097  | 0.16009 | K01501 | carbon-nitrogen hydrolase                                                                     | um11491   | 0.04645 | ni     | putative protein                                                                                            |
| 22c00204 | 0.16018 | ni     | peptidase family M48                                                                          | um12192   | 0.04646 | ni     | related to Tim22                                                                                            |
| 13c00308 | 0.16026 | ni     | hypothetical protein                                                                          | um00620   | 0.04652 | K11567 | conserved hypothetical protein                                                                              |
| 6a00110  | 0.16035 | K05853 | Ca <sup>2+</sup> -transporting ATPase                                                         | um10886.2 | 0.04658 | ni     | conserved hypothetical protein                                                                              |
| 28c00075 | 0.1605  | ni     | hypothetical protein                                                                          | um11319   | 0.04661 | ni     | probable SEC14 - phosphatidylinositol                                                                       |
| 22c00112 | 0.16074 | ni     | hypothetical protein                                                                          | um01033.2 | 0.04664 | K08333 | related to VPS15 - ser                                                                                      |
| 7a00216  | 0.16153 | K03417 | isocitrate lyase                                                                              | um002817  | 0.04676 | ni     | conserved hypothetical Ustilago-specific protein                                                            |
| 10c00010 | 0.16166 | K02975 | hypothetical protein                                                                          | um01668   | 0.04687 | ni     | putative protein                                                                                            |
| 12a00025 | 0.16174 | ni     | hypothetical protein                                                                          | um10190.2 | 0.04704 | K06062 | putative histone acetylase                                                                                  |
| 9c00252  | 0.16187 | K12600 | TPR repeat-containing protein                                                                 | um01637   | 0.04738 | K08516 | probable YKT6 - SNARE protein for Endoplasmic Reticulum-Golgi transport                                     |
| 19a00056 | 0.16189 | ni     | hypothetical protein                                                                          | um01195   | 0.04744 | K17218 | related to sulfite                                                                                          |
| 11a00080 | 0.16216 | ni     | hypothetical protein                                                                          | um02002   | 0.04748 | ni     | putative protein                                                                                            |
| 5a00033  | 0.16218 | K03841 | fructose-1,6-bisphosphate aldolase                                                            | um00987   | 0.04752 | ni     | conserved hypothetical protein                                                                              |
| 7a00164  | 0.16244 | ni     | translocase of outer mitochondrial membrane complex, subunit T                                | um04977   | 0.0477  | ni     | putative protein                                                                                            |
| 7c00059  | 0.16244 | ni     | oxidoqualene-lanosterol cyclase and related proteins                                          | um05641   | 0.04778 | K01074 | related to palmitoyl-protein thioesterase 1                                                                 |
| 22a00050 | 0.16256 | ni     | small Nuclear ribonucleoprotein G                                                             | um10541   | 0.04787 | ni     | conserved hypothetical protein                                                                              |
| 22c00271 | 0.16276 | ni     | hypothetical protein                                                                          | um03728   | 0.04792 | K00463 | conserved hypothetical protein                                                                              |
| 11c00041 | 0.16276 | K10949 | ER lumen protein retaining receptor                                                           | um11858   | 0.04804 | ni     | conserved hypothetical protein                                                                              |
| 3a00100  | 0.16298 | ni     | HLH transcription factor EBF/IOI-1                                                            | um12163   | 0.0481  | ni     | conserved hypothetical protein                                                                              |
| 14c00070 | 0.16309 | ni     | hypothetical protein                                                                          | um02605.2 | 0.0481  | ni     | putative protein                                                                                            |
| 25a00022 | 0.1634  | K05290 | GPI-anchor transamidase                                                                       | um05449   | 0.04811 | ni     | related to RPH1 - Transcriptional repressor of PHR1                                                         |
| 7c00102  | 0.16348 | ni     | hypothetical protein                                                                          | um10148   | 0.04834 | ni     | putative protein                                                                                            |
| 19c00051 | 0.16358 | ni     | hypothetical protein                                                                          | um03007   | 0.04867 | K06944 | probable RBG1 - ribosome interacting GTPase                                                                 |
| 11c00005 | 0.16366 | K05765 | actin depolymerizing factor                                                                   | um03630   | 0.04868 | ni     | related to metalloprotease MEP1                                                                             |
| 27c00053 | 0.16376 | ni     | hypothetical protein                                                                          | um01692   | 0.0488  | ni     | related to CHA1 - L-serine                                                                                  |
| 11a00081 | 0.16376 | ni     | conserved W/D40 repeat-containing protein                                                     | um05533   | 0.04894 | ni     | related to PRK1 - transcription factor regulating pyrimidine pathway                                        |
| 20a00018 | 0.16387 | ni     | glutamate decarboxylase                                                                       | um11488   | 0.04893 | ni     | probable ERV14 - ER-derived vesicles                                                                        |
| 11a00087 | 0.16394 | ni     | hypothetical protein                                                                          | um04875   | 0.04906 | ni     | conserved hypothetical protein                                                                              |
| 8c00125  | 0.16399 | K00128 | aldehyde dehydrogenase                                                                        | um02530   | 0.04908 | K11372 | conserved hypothetical protein                                                                              |
| 14c00048 | 0.16411 | ni     | uncharacterized conserved protein                                                             | um10098   | 0.0491  | ni     | related to TAO3 - Transcriptional Activator of OCH1                                                         |
| 9c00419  | 0.16416 | K03955 | cyf carrier protein                                                                           | um11018   | 0.04916 | ni     | putative protein                                                                                            |
| 10c00010 | 0.16453 | K08269 | serine/threonine-protein kinase                                                               | um11131   | 0.04917 | ni     | putative protein                                                                                            |
| 27a00039 | 0.16468 | K03037 | 26S proteasome regulatory complex, subunit RPN7/PSMD6                                         | um04426   | 0.04921 | ni     | conserved hypothetical protein                                                                              |
| 3a00087  | 0.16481 | ni     | hypothetical protein                                                                          | um02514.2 | 0.04921 | ni     | related to UPF3 - Nonsense-mediated mRNA decay protein                                                      |
| 16c00046 | 0.16481 | ni     | hypothetical protein                                                                          | um03638   | 0.04926 | ni     | hypothetical protein                                                                                        |
| 6c00018  | 0.16506 | K01624 | fructose 1,6-bisphosphate aldolase                                                            | um11445   | 0.04927 | ni     | putative protein                                                                                            |
| 3c00020  | 0.16517 | ni     | hypothetical protein                                                                          | um10445   | 0.04931 | ni     | conserved hypothetical protein                                                                              |
| 20a00044 | 0.16521 | ni     | hypothetical protein                                                                          | um11193   | 0.04965 | ni     | putative protein                                                                                            |
| 11a00052 | 0.16543 | K06006 | ketopantoate hydroxymethyltransferase                                                         | um04049   | 0.04974 | ni     | conserved hypothetical protein                                                                              |
| 25a00051 | 0.16543 | ni     | uncharacterized conserved protein                                                             | um01518   | 0.04977 | ni     | putative protein                                                                                            |
| 12c00020 | 0.16562 | ni     | phosphatidylinositol transfer protein SEC14 and related proteins                              | um01391   | 0.04997 | K01090 | related to phosphoprotein phosphatase 2C                                                                    |
| 7a00102  | 0.16563 | K15900 | predicted metalloprotease with chaperone activity                                             | um03632   | 0.05002 | K06110 | related to SEC6 - protein transport protein                                                                 |
| 26a00047 | 0.16569 | K14294 | hypothetical protein                                                                          | um11001   | 0.05011 | ni     | related to enoyl-coa hydratase protein 3                                                                    |
| 22c00151 | 0.1657  | K01433 | N-acetylglucosamine-6-phosphate deacetylase                                                   | um02749   | 0.05016 | K11838 | probable ubiquitin-specific processing protease 21                                                          |
| 5c00110  | 0.166   | ni     | hypothetical protein                                                                          | um15021   | 0.0502  | ni     | conserved hypothetical protein                                                                              |
| 22c00232 | 0.16626 | ni     | cytochrome P450 CYP4/CYP19/CYP26 subfamilies                                                  | um10574   | 0.05039 | K01077 | related to PHO8 - repressible alkaline phosphatase vacuolar                                                 |
| 9c00391  | 0.1664  | K15303 | hypothetical protein                                                                          | um00766   | 0.05063 | ni     | putative protein                                                                                            |
| 15c00009 | 0.16646 | ni     | acyl-coa reductase                                                                            | um06455   | 0.05078 | ni     | conserved hypothetical protein                                                                              |
| 22c00105 | 0.1665  | ni     | hypothetical protein                                                                          | um10886   | 0.05084 | ni     | putative protein                                                                                            |
| 9c00330  | 0.16663 | ni     | hypothetical protein                                                                          | um03283   | 0.05118 | ni     | conserved hypothetical protein                                                                              |
| 26c00059 | 0.16686 | K01885 | glutamy-tRNA synthetase                                                                       | um03497   | 0.05119 | ni     | conserved hypothetical protein                                                                              |
| 6a00071  | 0.16707 | ni     | N-methyltransferase                                                                           | um12277   | 0.05133 | K09550 | probable GIM3 - Gim complex component                                                                       |
| 9c00042  | 0.16719 | K14327 | uncharacterized conserved protein                                                             | um05137   | 0.05137 | ni     | conserved hypothetical protein                                                                              |
| 9c00215  | 0.1672  | K02542 | DNA replication licensing factor, MCM6 component                                              | um03657   | 0.05139 | ni     | conserved hypothetical protein                                                                              |
| 7a00303  | 0.16749 | ni     | serine palmitoyltransferase                                                                   | um06347   | 0.05141 | ni     | hypothetical protein                                                                                        |
| 13a00026 | 0.16756 | ni     | alcohol dehydrogenase                                                                         | um01251   | 0.05143 | ni     | hypothetical protein                                                                                        |
| 20a00080 | 0.16765 | K02880 | 60S ribosomal protein L22                                                                     | um00163   | 0.05156 | K17262 | related to Tubulin-specific chaperone B                                                                     |
| 6a00045  | 0.16837 | ni     | hypothetical protein                                                                          | um01637   | 0.05182 | ni     | related to RGS2 - Regulator of drug sensitivity                                                             |
| 16c00058 | 0.16841 | K16536 | hypothetical protein                                                                          | um05844   | 0.05168 | ni     | conserved hypothetical protein                                                                              |
| 9c00324  | 0.16844 | K06627 | dihydropyrimidine acetyltransferase                                                           | um01851   | 0.05178 | ni     | conserved hypothetical protein                                                                              |
| 9a00317  | 0.16854 | K00326 | NADH-cytochrome b-5 reductase                                                                 | um10845   | 0.05182 | K03649 | conserved hypothetical protein                                                                              |
| 12c00140 | 0.16855 | K13076 | delta-aminolevulinic desaturase                                                               | um02655   | 0.05185 | K05111 | related to UCG3 - protein transport protein                                                                 |
| 15a00094 | 0.16858 | ni     | hypothetical protein                                                                          | um15026   | 0.05198 | K01187 | probable maltase                                                                                            |
| 16c00082 | 0.16876 | ni     | hypothetical protein                                                                          | um00581   | 0.052   | ni     | conserved hypothetical protein                                                                              |
| 9a00218  | 0.16885 | K05285 | glycosylphosphatidylinositol anchor synthesis protein                                         | um03020   | 0.05206 | ni     | conserved hypothetical protein                                                                              |
| 25a00023 | 0.16896 | K11237 | NADPH oxidase                                                                                 | um11100   | 0.05209 | ni     | putative protein                                                                                            |
| 27a00088 | 0.16899 | K14780 | DEAF-Hox RNA helicase                                                                         | um05181   | 0.05211 | ni     | related to Phocudin                                                                                         |
| 10a00045 | 0.16977 | ni     | ni                                                                                            | um10759   | 0.05227 | ni     | hypothetical protein                                                                                        |
| 13a00029 | 0.16979 | ni     | membrane coat complex Retromer, subunit VPS5/SNX1                                             | um05554   | 0.05229 | ni     | conserved hypothetical protein                                                                              |
| 14a00068 | 0.16984 | K00106 | xanthine dehydrogenase                                                                        | um01366   | 0.05257 | K06630 | probable BMH1 - 14-3-3 protein epsilon                                                                      |
| 20a00049 | 0.16986 | K01427 | hypothetical protein                                                                          | um12108   | 0.05264 | K08490 | probable syntaxin                                                                                           |
| 16a00037 | 0.16989 | ni     | hypothetical protein                                                                          | um05274   | 0.05307 | ni     | ni                                                                                                          |
| 9c00098  | 0.1699  | K13091 | transcriptional coactivator CAPER                                                             | um04128   | 0.05315 | ni     | related to isopenicillin N epimerase                                                                        |
| 20a00055 | 0.16996 | K11380 | PHD finger protein BR140/LIN-49                                                               | um11772   | 0.05319 | ni     | ni                                                                                                          |
| 22a00183 | 0.16998 | ni     | mitochondrial sulfhydryl oxidase                                                              | um02191   | 0.05331 | ni     | hypothetical protein                                                                                        |
| 24c00031 | 0.17001 | ni     | acyl-coa-binding protein                                                                      | um04715   | 0.05338 | ni     | conserved hypothetical protein                                                                              |
| 22a00102 | 0.17003 | ni     | hypothetical protein                                                                          | um03023   | 0.05346 | K01166 | related to Ribonuclease Trv                                                                                 |
| 9c00344  | 0.17025 | K02154 | vacuolar H <sup>+</sup> -ATPase V0 sector, subunit a                                          | um02081   | 0.0536  | K05853 | endoplasmic reticulum calcium transporter                                                                   |
| 18c00007 | 0.1703  | K00698 | chitin synthase/hyaluronan synthase                                                           | um06397   | 0.05365 | ni     | conserved hypothetical protein                                                                              |
| 27a00002 | 0.17037 | ni     | hypothetical protein                                                                          | um03733   | 0.05371 | ni     | conserved hypothetical protein                                                                              |
| 18c00008 | 0.1704  | ni     | 17 beta-hydroxysteroid dehydrogenase type 3                                                   | um03680   | 0.05373 | K03136 | related to TFA1 - TFIIe subunit                                                                             |
| 7a00292  | 0.17045 | ni     | hypothetical protein                                                                          | um03816   | 0.05376 | ni     | related to PRP12 - involved in early maturation of pre-rRNA                                                 |
| 22a00046 | 0.17054 | K07393 | predicted glutathione S-transferase                                                           | um05050   | 0.05389 | ni     | hypothetical protein                                                                                        |
| 22a00171 | 0.17077 | K01557 | predicted fumarylacetoacetate hydrolase                                                       | um01549   | 0.05393 | ni     | related to mitochondrial inheritance component mdm12                                                        |
| 15c00082 | 0.17097 | ni     | inorganic phosphate transporter                                                               | um02742   | 0.05395 | ni     | conserved hypothetical protein                                                                              |
| 7c00108  | 0.17121 | ni     | hypothetical protein                                                                          | um15082   | 0.05396 | ni     | conserved hypothetical protein                                                                              |
| 14a00014 | 0.17139 | K12580 | CCR4-NOT transcriptional regulation complex, NOT5 subunit                                     | um04734   | 0.05397 | ni     | putative protein                                                                                            |
| 26a00032 | 0.17141 | K15177 | uncharacterized conserved protein                                                             | um02568   | 0.05404 | ni     | probable YCF1 - Vacuolar ABC transporter responsible for vacuolar sequestration of glutathione-S-conjugates |
| 9a00053  | 0.17193 | K00873 | hypothetical protein                                                                          | um03043   | 0.05411 | ni     | related to DDR1 - heat shock protein                                                                        |
| 7c00200  | 0.17142 | K14553 | WD40 repeat protein                                                                           | um00878   | 0.05411 | K11321 | conserved hypothetical protein                                                                              |
| 20c00017 | 0.17144 | K06942 | predicted GTP-binding protein                                                                 | um03404   | 0.05412 | ni     | hypothetical protein                                                                                        |
| 13a00030 | 0.17149 | K03064 | 26S proteasome regulatory complex                                                             | um04830   | 0.05418 | K15177 | conserved hypothetical protein                                                                              |
| 7a00327  | 0.17149 | K02732 | 20S proteasome, regulatory subunit beta type PSMB1/PRE7                                       | um04212   | 0.05422 | ni     | putative protein                                                                                            |
| 15a00031 | 0.17157 | ni     | hypothetical protein                                                                          | um04084   | 0.05443 | ni     | conserved hypothetical Ustilago-specific protein                                                            |
| 15c00092 | 0.17172 | K08157 | synaptic vesicle transporter SVOP and related transporters                                    | um02140   | 0.05443 | ni     | ni                                                                                                          |
| 18c00061 | 0.17176 | K13800 | uridylylase                                                                                   | um10221   | 0.05446 | ni     | conserved hypothetical protein                                                                              |
| 16a00015 | 0.17207 | ni     | hypothetical protein                                                                          | um05626   | 0.05447 | ni     | conserved hypothetical protein                                                                              |
| 7c00251  | 0.17211 | ni     | GAT-4-like transcription factors                                                              | um00515   | 0.05465 | ni     | putative protein                                                                                            |
| 22a00043 | 0.17215 | ni     | hypothetical protein                                                                          | um02550   | 0.05459 | ni     | putative protein                                                                                            |
| 9a00114  | 0.17225 | K11364 | histone acetyltransferase SAGA associated factor SGF29                                        | um04182   | 0.05474 | K00211 | probable TYR1 - prephenate dehydrogenase                                                                    |
| 12a00085 | 0.17235 | ni     | hypothetical protein                                                                          | um05118   | 0.05475 | ni     | putative protein                                                                                            |
| 9a00062  | 0.17257 | ni     | zinc-binding oxidoreductase                                                                   | um06335   | 0.05475 | ni     | putative protein                                                                                            |
| 7a00349  | 0.17268 | ni     | hypothetical protein                                                                          | um01077   | 0.05477 | ni     | conserved hypothetical protein                                                                              |
| 6c00080  | 0.17267 | ni     | uncharacterized conserved protein                                                             | um01885   | 0.05482 | ni     | probable Alcohol dehydrogenase                                                                              |
| 7a00217  | 0.1727  | K06640 | protein kinase of the Pl-3 kinase family                                                      | um04400   | 0.05497 | ni     | probable PRB1 - protease B                                                                                  |
| 22a00291 | 0.17276 | K01519 | inosine triphosphate pyrophosphatase                                                          | um03352   | 0.05498 | ni     | probable RAS GTPase-activating protein sar1                                                                 |
| 10c00017 | 0.17291 | K04648 | microtubule-associated protein dynein DCTN1/Glued                                             | um03540   | 0.05499 | ni     | conserved hypothetical protein                                                                              |
| 19c00105 | 0.17296 | K14688 | Zn <sup>2+</sup> transporter ZNT1 and related Cd <sup>2+</sup> /Zn <sup>2+</sup> transporters | um12107   | 0.0552  | ni     | conserved hypothetical protein                                                                              |
| 5a00005  | 0.17298 | ni     | amino acid transporters                                                                       | um03340   | 0.05542 | K11129 | probable NHP2 - nucleolar rRNA processing protein                                                           |
| 18c00039 | 0.17301 | K08486 | SNARE protein Syntaxin 1 and related proteins                                                 | um00670   | 0.05548 | ni     | conserved hypothetical protein                                                                              |
| 7a00344  | 0.17327 | ni     | hypothetical protein                                                                          | um00795   | 0.05555 | ni     | hypothetical protein                                                                                        |
| 19a00063 | 0.1733  | K09613 | COP9 signalosome, subunit CSN5                                                                | um05740   | 0.05552 | K01187 | probable Alpha-glucosidase precursor                                                                        |
| 12a00032 | 0.17332 | ni     | predicted membrane protein                                                                    | um10412   | 0.05563 | ni     | conserved hypothetical protein                                                                              |
| 27a00091 | 0.17333 | ni     | serine/threonine protein kinase                                                               | um12312   | 0.05571 | ni     | conserved hypothetical protein                                                                              |
| 15c00016 | 0.1734  | ni     | aldehyde dehydrogenase                                                                        | um01550   | 0.05572 | ni     | conserved hypothetical protein                                                                              |
| 22c00191 | 0.17350 | ni     | predicted alpha-beta hydrolase                                                                | um11590   | 0.05585 | K14142 | conserved hypothetical protein                                                                              |
| 11a00025 | 0.17365 | K14772 | DRIM (Down-regulated in metastasis)-like proteins                                             | um11306   | 0.0564  | ni     | putative protein                                                                                            |
| 8c00100  | 0.17377 | K00784 | septin family protein                                                                         | um03129   | 0.05666 | ni     | hypothetical protein                                                                                        |
| 13c00005 | 0.17404 | ni     | hypothetical protein                                                                          | um02653   | 0.05674 | K03843 | related to alpha-1                                                                                          |
| 25c00051 | 0.17416 | ni     | phosphatidic acid-prefering phospholipase A1                                                  | um02333   | 0.05679 | ni     | putative protein                                                                                            |
| 18a00110 | 0.17418 | ni     | hypothetical protein                                                                          | um05503   | 0.05692 | K02144 | related to vacuolar ATP synthase subunit H                                                                  |
| 22a00048 | 0.17451 | ni     | hypothetical protein                                                                          | um06276   | 0.05698 | ni     | putative protein                                                                                            |
| 15c00007 | 0.17459 | ni     | hypothetical protein                                                                          | um11061   | 0.05706 | ni     | hypothetical protein                                                                                        |
| 6a00040  | 0.17459 | ni     | DHHC-type Zn-finger proteins                                                                  | um05382   | 0.05707 | ni     | conserved hypothetical protein                                                                              |
| 7c00112  | 0.17461 | ni     | WD40 repeat protein                                                                           | um10474.2 | 0.05716 | ni     | conserved hypothetical protein                                                                              |
| 13c00038 | 0.17463 | ni     | hypothetical protein                                                                          | um01728.2 | 0.05717 | ni     | conserved hypothetical protein                                                                              |
| 9a00142  | 0.1748  | ni     | hypothetical protein                                                                          | um00597   | 0.05719 | ni     | ni                                                                                                          |
| 10a00083 | 0.17484 | ni     | putative cargo transport protein ERV29                                                        | um11499   | 0.05731 | K02980 | probable RPS29B - ribosomal protein S29                                                                     |
| 20c00024 | 0.17492 | ni     | hypothetical protein                                                                          | um05331   | 0.05734 | K02865 | probable ribosomal protein L10a                                                                             |
| 16a00019 | 0.17496 | K03626 | transcription factor containing NAC and TS-N domains                                          | um11213   | 0.0574  | ni     | conserved hypothetical protein                                                                              |
| 26a00076 | 0.17514 | K12195 | uncharacterized conserved protein                                                             | um04097   | 0.05767 | ni     | related to polyketide synthase                                                                              |
| 8c00050  | 0.1752  | ni     | putative transcriptional repressor regulating G2/M transition                                 | um03959   | 0.05773 | K09497 | probable t-complex-type molecular chaperone                                                                 |
| 27a00050 | 0.17526 | K13116 | DEAD-box protein abstract                                                                     | um10527.2 | 0.05773 | K02967 | related to MRP4 - mitochondrial ribosomal protein                                                           |
| 7c00138  | 0.17528 | ni     | predicted coiled-coil protein                                                                 | um03577   | 0.05777 | ni     | conserved hypothetical Ustilago-specific protein                                                            |
| 22a00150 | 0.17534 | ni     | cytochrome b5                                                                                 | um10320.2 | 0.05779 | K14790 | related to CWH43 - putative sensor                                                                          |
| 13c00075 | 0.1757  | ni     | carbon-nitrogen hydrolase                                                                     | um00473   | 0.      |        |                                                                                                             |



|          |         |        |                                                                    |           |         |        |                                                                                                   |
|----------|---------|--------|--------------------------------------------------------------------|-----------|---------|--------|---------------------------------------------------------------------------------------------------|
| 20c0044  | 0.17825 | ni     | mitochondrial inheritance and actin cytoskeleton organization prot | um11577   | 0.06078 | K03254 | probable eukaryotic translation initiation factor eIF-3                                           |
| 12d00112 | 0.17826 | ni     | vesicle coat complex AP-1/AP-2/AP-4, beta subunit                  | um01144   | 0.06080 | K03538 | related to POP4 - protein involved in processing of tRNAs and rRNAs                               |
| 7d00218  | 0.17844 | ni     | glycosyl transferase                                               | um00227   | 0.06095 | K01533 | probable CCC-2 - P-type ATPase                                                                    |
| 28d00387 | 0.17845 | ni     | membrane protein                                                   | um02249   | 0.06113 | ni     | putative protein                                                                                  |
| 13c00100 | 0.17876 | ni     | hypothetical protein                                               | um11057   | 0.06128 | ni     | related to OPT1 - High-affinity glutathione transporter                                           |
| 4d00018  | 0.17895 | ni     | hypothetical protein                                               | um11171   | 0.06142 | ni     | related to sugar transport protein                                                                |
| 9c00125  | 0.17916 | ni     | hypothetical protein                                               | um10852   | 0.06146 | K10259 | related to MET30 - involved in regulation of sulfur assimilation genes and cell cycle progression |
| 22d0068  | 0.17947 | ni     | hypothetical protein                                               | um10913   | 0.06176 | ni     | related to AHA1 - stress-regulated cochaperone                                                    |
| 5c00058  | 0.1796  | ni     | hypothetical protein                                               | um10696   | 0.06182 | ni     | conserved hypothetical protein                                                                    |
| 13d00100 | 0.17978 | ni     | hypothetical protein                                               | um02998   | 0.06189 | ni     | conserved hypothetical protein                                                                    |
| 9d00402  | 0.17998 | K13721 | puromycin-sensitive aminopeptidase and related aminopeptidase      | um03704   | 0.0619  | ni     | conserved hypothetical protein                                                                    |
| 22d0000  | 0.18001 | K04564 | manganese(II)-dependent superfamily manganese superoxide dismutase | um10332   | 0.06191 | ni     | conserved hypothetical protein                                                                    |
| 12c00116 | 0.18001 | K04564 | manganese superoxide dismutase                                     | um10732   | 0.06205 | ni     | related to dimeric dihydrolid dehydrogenase                                                       |
| 7d00235  | 0.18004 | ni     | hypothetical protein                                               | um00003   | 0.06239 | ni     | conserved hypothetical protein                                                                    |
| 25d00066 | 0.18018 | ni     | hypothetical protein                                               | um12097   | 0.06254 | ni     | conserved hypothetical protein                                                                    |
| 8c00090  | 0.18022 | ni     | hypothetical protein                                               | um12242.2 | 0.06261 | K03321 | conserved hypothetical protein                                                                    |
| 14d00009 | 0.18036 | ni     | hypothetical protein                                               | um10536   | 0.06262 | ni     | conserved hypothetical protein                                                                    |
| 9d00086  | 0.18037 | K17262 | alpha-tubulin folding cofactor B                                   | um03443   | 0.0631  | K10688 | related to ubiquitin-conjugating enzyme                                                           |
| 20c00043 | 0.18042 | ni     | hypothetical protein                                               | um00148   | 0.06314 | ni     | hypothetical protein                                                                              |
| 19c00038 | 0.18057 | ni     | hypothetical protein                                               | um04292   | 0.06318 | ni     | conserved hypothetical protein                                                                    |
| 20c00078 | 0.18057 | K14376 | poly(A) polymerase and related nucleotidyltransferases             | um12074   | 0.06326 | K06210 | probable NMA2 - nicotinate-nucleotide adenyllyltransferase                                        |
| 10d00021 | 0.18069 | K01551 | putative arsenite-translocating ATPase                             | um11462   | 0.06356 | ni     | putative protein                                                                                  |
| 9c00408  | 0.18072 | ni     | hypothetical protein                                               | um11340   | 0.06366 | K04555 | probable QR18 - E2 ubiquitin-conjugating enzyme                                                   |
| 14d00114 | 0.18084 | ni     | hypothetical protein                                               | um02412   | 0.06368 | K13195 | related to glycine-rich RNA-binding protein                                                       |
| 10c00055 | 0.18094 | K00814 | alanine aminotransferase                                           | um00461   | 0.06371 | ni     | conserved hypothetical protein                                                                    |
| 22d00098 | 0.18101 | K14006 | vesicle coat complex COP1I, subunit SEC23                          | um02478   | 0.06388 | K13192 | conserved hypothetical protein                                                                    |
| 16c00066 | 0.18109 | ni     | hypothetical protein                                               | um12100   | 0.06402 | ni     | putative protein                                                                                  |
| 13d00090 | 0.18117 | K01951 | GMP synthase                                                       | um04139   | 0.06409 | ni     | conserved hypothetical protein                                                                    |
| 7d00034  | 0.18119 | ni     | putative signal transduction protein involved in RNA splicing      | um10380   | 0.06412 | ni     | conserved hypothetical protein                                                                    |
| 6d00026  | 0.18126 | K00100 | aldoketo reductase family proteins                                 | um05475   | 0.06427 | ni     | conserved hypothetical protein                                                                    |
| 28c00032 | 0.18134 | ni     | hypothetical protein                                               | um05915   | 0.06428 | K07008 | conserved hypothetical protein                                                                    |
| 7d00041  | 0.18141 | ni     | hypothetical protein                                               | um02028   | 0.06434 | ni     | related to acyl-coenzyme A oxidase 1                                                              |
| 13c00093 | 0.18165 | ni     | hypothetical protein                                               | um05939   | 0.06451 | ni     | conserved hypothetical protein                                                                    |
| 16c00034 | 0.1817  | K15153 | transcriptional regulator SOH1                                     | um02286   | 0.06462 | ni     | conserved hypothetical protein                                                                    |
| 16c00059 | 0.18189 | K07950 | predicted aminotransferase                                         | um05177   | 0.06468 | K17086 | related to endosomal protein EMP70 precursor                                                      |
| 26c00030 | 0.18194 | ni     | hypothetical protein                                               | um05185   | 0.06472 | ni     | conserved hypothetical protein                                                                    |
| 15d00059 | 0.18194 | ni     | predicted mechanosensitive ion channel                             | um01073   | 0.06475 | ni     | putative protein                                                                                  |
| 7d00319  | 0.18232 | K00549 | methionine synthase II                                             | um00113   | 0.06478 | ni     | related to transcriptional activator acu-15                                                       |
| 10c00086 | 0.18243 | K01230 | mannosyl-oligosaccharide alpha-1,2-mannosidase                     | um04743   | 0.06481 | K01514 | related to PPK1 - exopolyphosphatase                                                              |
| 9c00284  | 0.18261 | K15289 | signal peptidase I                                                 | um00127   | 0.06486 | ni     | putative protein                                                                                  |
| 14d00107 | 0.18324 | ni     | hypothetical protein                                               | um03770   | 0.06512 | ni     | conserved hypothetical protein                                                                    |
| 9d00237  | 0.18327 | ni     | membrane coat complex Retromer, subunit VPS5/SNX1                  | um05070   | 0.06544 | ni     | conserved hypothetical protein                                                                    |
| 8c00046  | 0.18338 | ni     | chromatin remodeling protein                                       | um10028   | 0.06547 | ni     | conserved hypothetical protein                                                                    |
| 7d00143  | 0.18384 | K14536 | transcriptional activator factor 2                                 | um05915   | 0.06548 | K07008 | conserved hypothetical protein                                                                    |
| 20c00061 | 0.18391 | K12158 | ubiquitin-like protein                                             | um05496   | 0.06574 | ni     | related to cystathionine beta-lyase                                                               |
| 19c00060 | 0.18393 | ni     | hypothetical protein                                               | um01221   | 0.06591 | K07374 | alpha tubulin                                                                                     |
| 9d00379  | 0.18394 | K12832 | uncharacterized conserved protein                                  | um02972   | 0.06593 | ni     | putative protein                                                                                  |
| 24c00073 | 0.18397 | ni     | hypothetical protein                                               | um06234   | 0.06586 | K01265 | probable methionyl aminopeptidase                                                                 |
| 11d00053 | 0.18403 | K04711 | alkaline ceramidase                                                | um05612   | 0.0663  | ni     | related to proline transport helper PTH1                                                          |
| 12d00070 | 0.18407 | K02952 | ribosomal protein S18                                              | um04667   | 0.06646 | ni     | conserved hypothetical protein                                                                    |
| 26d00043 | 0.18408 | ni     | transporter, ABC superfamily                                       | um00354   | 0.06659 | ni     | related to Sml1-specific protease 1                                                               |
| 16c00039 | 0.18414 | ni     | hypothetical protein                                               | um05608   | 0.06687 | K11095 | related to U1 small nuclear ribonucleoprotein C                                                   |
| 5d00020  | 0.18429 | K07936 | GTP-binding protein C4/GSP1                                        | um01829   | 0.06696 | ni     | related to SOD1 protein                                                                           |
| 7d00315  | 0.18431 | K13122 | predicted actin-binding protein                                    | um11761   | 0.06704 | K03679 | related to RRP4 - 3                                                                               |
| 15c00090 | 0.18434 | ni     | hypothetical protein                                               | um15066   | 0.06707 | ni     | conserved hypothetical protein                                                                    |
| 16c00037 | 0.18448 | ni     | hypothetical protein                                               | um05960   | 0.06707 | ni     | conserved hypothetical protein                                                                    |
| 7d00168  | 0.18462 | K03020 | DNA-directed RNA polymerase, subunit L                             | um06506   | 0.0671  | ni     | conserved hypothetical protein                                                                    |
| 11d00071 | 0.18463 | ni     | hypothetical protein                                               | um10826   | 0.06716 | ni     | conserved hypothetical protein                                                                    |
| 12d00084 | 0.18491 | ni     | hypothetical protein                                               | um11237   | 0.06716 | ni     | putative protein                                                                                  |
| 5c00147  | 0.18513 | ni     | predicted hydrolase related to diene lactone hydrolase             | um10033   | 0.06717 | K15172 | related to SPT5 - transcription elongation protein                                                |
| 9c00286  | 0.18523 | K00766 | anthranilate phosphoribosyltransferase                             | um11578   | 0.0673  | K02731 | probable PRE6 - 20S proteasome subunit                                                            |
| 25d00074 | 0.18529 | K00766 | anthranilate phosphoribosyltransferase                             | um06204   | 0.06732 | K03632 | related to PPK1 - exopolyphosphatase                                                              |
| 8c00062  | 0.18531 | K11501 | hypothetical protein                                               | um10237   | 0.06753 | K02214 | related to CDC7 - protein kinase                                                                  |
| 7d00313  | 0.18567 | K03132 | transcription initiation factor TFIID, subunit TAF7                | um04795   | 0.06754 | K14301 | nucleoprotein                                                                                     |
| 10c00011 | 0.18571 | K12845 | 60S ribosomal protein 15.5kD/SMU13                                 | um03469   | 0.06757 | K05288 | related to GPI13 - protein involved in glycosylphosphatidylinositol biosynthesis                  |
| 14c00001 | 0.18586 | ni     | hypothetical protein                                               | um05293   | 0.06779 | K07151 | probable oligosaccharyltransferase                                                                |
| 28c00040 | 0.18619 | ni     | DNA-binding proteins Brigh1/BRCAA1/RBP1                            | um05282   | 0.06779 | ni     | conserved hypothetical protein                                                                    |
| 15d00092 | 0.18622 | ni     | hypothetical protein                                               | um05231   | 0.06806 | ni     | related to YIP3 protein - proposed to be involved in ER to Golgi transport                        |
| 5d00055  | 0.18627 | ni     | uncharacterized conserved protein                                  | um03801   | 0.06813 | ni     | ni                                                                                                |
| 1c00031  | 0.18646 | ni     | adaptor protein Enigma and related PDZ-LIM proteins                | um12298   | 0.06831 | ni     | conserved hypothetical protein                                                                    |
| 24c00040 | 0.18649 | ni     | replication factor C, subunit RFC1                                 | um00291   | 0.06836 | ni     | conserved hypothetical protein                                                                    |
| 18d00074 | 0.18678 | ni     | hypothetical protein                                               | um03779   | 0.06841 | ni     | related to galactinol synthase                                                                    |
| 6d00080  | 0.18683 | ni     | acyl-coa thioesterase                                              | um00872   | 0.06846 | K00928 | probable HOM3 - L-aspartate 4-P-transferase                                                       |
| 9c00093  | 0.18695 | ni     | carboxylesterase and related proteins                              | um10406   | 0.06847 | ni     | conserved hypothetical protein                                                                    |
| 9c00377  | 0.18702 | K14798 | uncharacterized conserved protein                                  | um02732   | 0.06888 | ni     | conserved hypothetical protein                                                                    |
| 9d00155  | 0.18704 | ni     | try-like conserved proteins                                        | um11428   | 0.06901 | K14326 | probable NAM7 - nonsense-mediated mRNA decay protein                                              |
| 18c00064 | 0.1872  | ni     | uncharacterized conserved protein                                  | um10062   | 0.0691  | ni     | related to monoxygenase                                                                           |
| 8d00020  | 0.18726 | K07910 | GTPase Rab18                                                       | um03648   | 0.06911 | ni     | ni                                                                                                |
| 7d00336  | 0.18732 | K05931 | thioreonine N-methyltransferase CARM1                              | um12157   | 0.06915 | ni     | conserved hypothetical protein                                                                    |
| 12d01020 | 0.18747 | K10583 | ubiquitin-protein ligase                                           | um05973   | 0.06928 | ni     | conserved hypothetical protein                                                                    |
| 15d00046 | 0.18756 | K09584 | thioredoxin/protein disulfide isomerase                            | um01824   | 0.06942 | K15918 | conserved hypothetical protein                                                                    |
| 20c00067 | 0.18768 | ni     | hypothetical protein                                               | um00929   | 0.06964 | K13122 | conserved hypothetical protein                                                                    |
| 19d00030 | 0.18828 | ni     | hypothetical protein                                               | um02750   | 0.06965 | K01092 | related to quinic acid utilisation protein QUTG                                                   |
| 22c00033 | 0.18844 | ni     | hypothetical protein                                               | um10174   | 0.06972 | ni     | conserved hypothetical protein                                                                    |
| 13c00078 | 0.18852 | K06682 | ras GTPase                                                         | um00272   | 0.06988 | ni     | conserved hypothetical protein                                                                    |
| 14c00025 | 0.18887 | K09537 | hypothetical protein                                               | um11808   | 0.06996 | K04718 | related to LCB5 - sphingolipid long chain base kinase                                             |
| 22d00080 | 0.1889  | ni     | G-protein beta subunit-like protein GNB1L                          | um06411   | 0.07002 | K01876 | related to aspartate-tRNA ligase                                                                  |
| 24d00035 | 0.18896 | ni     | mannosyltransferase                                                | um05351   | 0.07029 | ni     | conserved hypothetical protein                                                                    |
| 12c00071 | 0.18925 | K02738 | ZnS-finger, regulatory subunit beta type PSMB6/PSMB9/PI            | um05699   | 0.07079 | ni     | hypothetical protein                                                                              |
| 7c00265  | 0.1891  | ni     | serine/threonine kinase TIP30/C33                                  | um04179   | 0.07099 | K02734 | probable multicatalytic endopeptidase complex chain PRE1                                          |
| 12d00087 | 0.18911 | K14293 | karyopherin (importin) beta 1                                      | um02845.2 | 0.07099 | ni     | conserved hypothetical protein                                                                    |
| 7d00063  | 0.1892  | ni     | hypothetical protein                                               | um12259   | 0.07109 | K15111 | related to PET8 - Protein of the mitochondrial carrier family                                     |
| 22d00073 | 0.18921 | ni     | predicted membrane protein                                         | um00480   | 0.07109 | ni     | transmembrane mucin involved in surface sensing via MAP-kinase cascade                            |
| 18d00028 | 0.18922 | ni     | hypothetical protein                                               | um00907   | 0.07111 | K10704 | probable MMS2 - part of the error-free postreplication repair pathway                             |
| 9d00196  | 0.1893  | K02871 | mitochondrial/chloroplast ribosomal protein L13                    | um00928   | 0.07115 | ni     | putative protein                                                                                  |
| 4c00024  | 0.18935 | ni     | hypothetical protein                                               | um01173   | 0.07116 | K15456 | related to KTI12 - Elongator associated protein                                                   |
| 12c00126 | 0.18935 | K00382 | dihydropyrimidine dehydrogenase                                    | um05602   | 0.07119 | ni     | probable sugar transporter                                                                        |
| 10c00060 | 0.18946 | ni     | cystine desulfase FCY1 and related enzymes                         | um01598   | 0.07124 | ni     | ni                                                                                                |
| 22d00074 | 0.1896  | ni     | hypothetical protein                                               | um03613   | 0.07141 | ni     | putative protein                                                                                  |
| 20c00035 | 0.18976 | ni     | hypothetical protein                                               | um10481   | 0.07151 | K05687 | conserved hypothetical protein                                                                    |
| 4c00011  | 0.18989 | ni     | hypothetical protein                                               | um00328   | 0.07154 | ni     | putative protein                                                                                  |
| 19d00105 | 0.18995 | K10735 | predicted alpha-helical protein                                    | um05134   | 0.07164 | ni     | conserved hypothetical protein                                                                    |
| 18c00132 | 0.19009 | ni     | hypothetical protein                                               | um12045   | 0.07164 | ni     | related to alpha-glucosidase II beta subunit                                                      |
| 9d00216  | 0.19033 | K05349 | hypothetical protein                                               | um00948   | 0.07169 | K11324 | related to SWC4 - component of the Swr1 complex                                                   |
| 24d00039 | 0.19034 | K15161 | CDK8 kinase-activating protein cyclin C                            | um02314   | 0.07175 | ni     | putative protein                                                                                  |
| 8d00095  | 0.19039 | ni     | hypothetical protein                                               | um03590   | 0.07183 | ni     | putative protein                                                                                  |
| 9d00279  | 0.19059 | ni     | hypothetical protein                                               | um03078   | 0.07196 | ni     | conserved hypothetical protein                                                                    |
| 19d00065 | 0.1906  | ni     | hypothetical protein                                               | um01190   | 0.07198 | ni     | conserved hypothetical protein                                                                    |
| 7d00222  | 0.19064 | ni     | hypothetical protein                                               | um02533   | 0.07198 | ni     | hypothetical protein                                                                              |
| 22d00267 | 0.1907  | K00232 | acyl-coa oxidase                                                   | um11827   | 0.072   | K02991 | probable RPS6B - 40s ribosomal protein S6                                                         |
| 26c00088 | 0.19076 | ni     | hypothetical protein                                               | um05143   | 0.07225 | K11279 | probable nucleosome assembly protein I                                                            |
| 27c00072 | 0.19086 | K11262 | acyl-coa oxidase                                                   | um04151   | 0.07231 | K10844 | probable RAD3 - DNA helicase                                                                      |
| 25d00013 | 0.19091 | ni     | serine/threonine protein kinase                                    | um11098   | 0.07251 | K01915 | probable GLN1 - glutamate-ammonia ligase                                                          |
| 14d00006 | 0.19104 | K08740 | mismatch repair ATPase MSH4                                        | um00785   | 0.07253 | ni     | conserved hypothetical protein                                                                    |
| 15c00005 | 0.19116 | ni     | glutaredoxin and related proteins                                  | um00909   | 0.07261 | ni     | conserved hypothetical protein                                                                    |
| 27d00118 | 0.19131 | ni     | hypothetical protein                                               | um10451   | 0.07274 | ni     | conserved hypothetical protein                                                                    |
| 19c00035 | 0.19136 | ni     | WD40 repeat protein                                                | um11221   | 0.07307 | ni     | hypothetical protein                                                                              |
| 22c00097 | 0.19137 | ni     | hypothetical protein                                               | um04682   | 0.07313 | ni     | conserved hypothetical protein                                                                    |
| 7d00338  | 0.19144 | ni     | hypothetical protein                                               | um11956   | 0.07322 | ni     | conserved hypothetical protein                                                                    |
| 21c00004 | 0.19159 | ni     | hypothetical protein                                               | um04017   | 0.07324 | ni     | conserved hypothetical protein                                                                    |
| 10c00016 | 0.19161 | ni     | hypothetical protein                                               | um04189   | 0.07345 | ni     | related to Cytochrome P450                                                                        |
| 12d00110 | 0.19175 | ni     | hypothetical protein                                               | um04160   | 0.07355 | ni     | Dkh6                                                                                              |
| 3d00088  | 0.1919  | ni     | hypothetical protein                                               |           |         |        |                                                                                                   |

|          |         |        |                                                                      |           |         |        |                                                                                              |
|----------|---------|--------|----------------------------------------------------------------------|-----------|---------|--------|----------------------------------------------------------------------------------------------|
| 9400126  | 0.19486 | ni     | hypothetical protein                                                 | um05852   | 0.07755 | ni     | hypothetical protein                                                                         |
| 9400336  | 0.19501 | ni     | predicted transporter                                                | um04376   | 0.07778 | ni     | conserved hypothetical protein                                                               |
| 12c00309 | 0.19513 | ni     | hypothetical protein                                                 | um01875   | 0.07784 | ni     | conserved hypothetical protein                                                               |
| 9400148  | 0.19532 | ni     | hypothetical protein                                                 | um01810   | 0.07802 | ni     | hypothetical protein                                                                         |
| 1400009  | 0.19538 | ni     | M-phase inducer phosphatase                                          | um02360   | 0.07808 | K02141 | conserved hypothetical protein                                                               |
| 20c00050 | 0.19538 | ni     | hypothetical protein                                                 | um10030   | 0.07813 | ni     | putative protein                                                                             |
| 20d00036 | 0.1957  | K09495 | chaperonin-class protein, TCP-1 gamma subunit                        | um11023   | 0.07818 | ni     | conserved hypothetical protein                                                               |
| 26d00017 | 0.19614 | K10259 | signal transduction factor box and WD-40 proteins                    | um01127   | 0.07829 | K00602 | conserved hypothetical protein                                                               |
| 19c00078 | 0.19622 | ni     | oxysterol-binding protein                                            | um03989.2 | 0.07847 | K03615 | putative protein                                                                             |
| 22d00099 | 0.19643 | ni     | O-linked N-acetylglucosamine transferase CGT                         | um02682   | 0.07848 | K16302 | conserved hypothetical protein                                                               |
| 14d00091 | 0.19683 | ni     | intermediate filament-like protein, sorting nexins, and related prot | um10344   | 0.07849 | ni     | conserved hypothetical protein                                                               |
| 26c00028 | 0.19691 | K01823 | isopentenyl diphosphate, dimethylallyl pyrophosphate isomeras        | um02855   | 0.07855 | ni     | related to FES1 - Hsp70 nucleotide exchange factor                                           |
| 6d00106  | 0.19689 | ni     | hypothetical protein                                                 | um10081   | 0.07889 | ni     | conserved hypothetical protein                                                               |
| 2c00070  | 0.197   | ni     | hypothetical protein                                                 | um10331   | 0.07889 | K14171 | related to peroxisomal membrane protein                                                      |
| 7d00308  | 0.19704 | ni     | hypothetical protein                                                 | um12296   | 0.07889 | ni     | conserved hypothetical protein                                                               |
| 19c00124 | 0.19705 | K00573 | protein-L-homocysteine(4-aspartate) O-methyltransferase              | um02993   | 0.07897 | ni     | ni                                                                                           |
| 13c00107 | 0.19708 | K04554 | ubiquitin-protein ligase                                             | um05540   | 0.07908 | ni     | probable RET3 - coatomer complex zeta chain                                                  |
| 5d00049  | 0.1971  | ni     | M13 family peptidase                                                 | um06218   | 0.0791  | ni     | conserved hypothetical protein                                                               |
| 8d00089  | 0.19735 | ni     | hypothetical protein                                                 | um02878.2 | 0.07915 | ni     | conserved hypothetical protein                                                               |
| 20c0014  | 0.19736 | K01866 | tyrosyl-tRNA synthetase                                              | um12305   | 0.07917 | ni     | probable GTP-binding protein 1                                                               |
| 5d00058  | 0.19769 | K07095 | membrane coat complex Retromer, subunit VPS23/PEP11                  | um01470   | 0.0794  | K14403 | related to YSH1 - component of pre-mRNA polyadenylation factor PF I                          |
| 7d00051  | 0.19777 | ni     | signal transduction serine/threonine kinase                          | um11728   | 0.07946 | ni     | related to Ygopee protein                                                                    |
| 10c00054 | 0.19794 | ni     | actin-related protein - Arp6p                                        | um10025   | 0.07964 | ni     | conserved hypothetical protein                                                               |
| 9d00178  | 0.19801 | K11872 | ubiquitin-specific protease                                          | um02981   | 0.07983 | ni     | conserved hypothetical protein                                                               |
| 16d00039 | 0.19807 | ni     | hypothetical protein                                                 | um12084   | 0.07986 | ni     | related to Molybdopterin synthase small subunit                                              |
| 18c00076 | 0.19823 | ni     | mitochondrial carnitine-acylcarnitine carrier protein                | um01919   | 0.0799  | K16794 | probable platelet-activating factor acetylhydrolase Ib alpha subunit                         |
| 15d00005 | 0.19834 | K14574 | predicted exosome subunit                                            | um11205   | 0.08002 | K07893 | probable YPT6 - GTP-binding protein of the rab family                                        |
| 9c00191  | 0.19838 | ni     | hypothetical protein                                                 | um03379   | 0.08003 | ni     | conserved hypothetical protein                                                               |
| 5d00076  | 0.19846 | ni     | RNA-binding protein RBM5 and related proteins                        | um05270   | 0.08028 | ni     | conserved hypothetical protein                                                               |
| 22d0173  | 0.19865 | K00547 | homocysteine S-methyltransferase                                     | um06019   | 0.08037 | K08794 | probable CMK1 - Ca <sup>2+</sup>                                                             |
| 9c00091  | 0.19868 | K03352 | hypothetical protein                                                 | um02947   | 0.08043 | K01128 | related to SC11 - fructosyl phosphoSphingolipid phospholipase                                |
| 9c00274  | 0.19885 | ni     | hypothetical protein                                                 | um00049   | 0.08116 | ni     | conserved hypothetical protein                                                               |
| 14c00115 | 0.19887 | ni     | hypothetical protein                                                 | um11454   | 0.08125 | ni     | conserved hypothetical protein                                                               |
| 24c00086 | 0.1991  | ni     | uncharacterized conserved protein                                    | um11726   | 0.08126 | ni     | conserved hypothetical protein                                                               |
| 18d00077 | 0.19918 | K11360 | hypothetical protein                                                 | um03859   | 0.08129 | ni     | hypothetical protein                                                                         |
| 7d00027  | 0.19948 | ni     | hypothetical protein                                                 | um05619   | 0.08139 | ni     | conserved hypothetical protein                                                               |
| 13d00038 | 0.19955 | K11552 | predicted DNA methylase                                              | um05946   | 0.08141 | ni     | ni                                                                                           |
| 14d00013 | 0.19968 | ni     | synaptic vesicle transporter SVOP and related transporters           | um04877   | 0.08146 | ni     | hypothetical protein                                                                         |
| 4d00012  | 0.19981 | K12948 | signal peptidase complex subunit                                     | um12132   | 0.08153 | ni     | conserved hypothetical protein                                                               |
| 5d00115  | 0.19983 | ni     | very long-chain acyl-CoA synthetase                                  | um11988   | 0.08157 | ni     | putative protein                                                                             |
| 13d00109 | 0.19984 | ni     | hypothetical protein                                                 | um11922   | 0.08201 | ni     | related to Chitin deacetylase precursor                                                      |
| 7c00165  | 0.19989 | K02607 | hypothetical protein                                                 | um10023   | 0.08205 | K07243 | high-affinity iron permease                                                                  |
| 7d00232  | 0.19995 | K02959 | mitochondrial/chloroplast ribosomal protein S16                      | um01670   | 0.08211 | K15436 | related to MTR10 - involved in nuclear protein import                                        |
| 9d00028  | 0.20005 | ni     | hypothetical protein                                                 | um01198   | 0.08216 | K10109 | probable PEP1 - phosphoprotein phosphatase PPG catalytic chain                               |
| 7d00196  | 0.2002  | ni     | D-aspartate oxidase                                                  | um00996.2 | 0.08236 | ni     | conserved hypothetical protein                                                               |
| 7d00302  | 0.20028 | K02896 | 60s ribosomal protein L24                                            | um05893   | 0.08262 | ni     | conserved hypothetical protein                                                               |
| 7d00048  | 0.20031 | ni     | beta-glucuronidase GUSB                                              | um11190   | 0.08263 | ni     | putative protein                                                                             |
| 13c00060 | 0.20033 | K11204 | gamma-glutamylcysteine synthetase                                    | um05976   | 0.08277 | ni     | hypothetical protein                                                                         |
| 10c00073 | 0.20034 | ni     | hypothetical protein                                                 | um02126   | 0.08289 | ni     | conserved hypothetical protein                                                               |
| 14d00059 | 0.20034 | K14763 | uncharacterized conserved protein                                    | um15065   | 0.08296 | ni     | conserved hypothetical protein                                                               |
| 14d00111 | 0.20054 | K01880 | glycyl-tRNA synthetase and related class II tRNA synthetase          | um03140   | 0.08297 | ni     | ni                                                                                           |
| 24d00002 | 0.20064 | ni     | multidrug resistance-associated protein                              | um00092   | 0.08318 | ni     | related to levodopa reductase                                                                |
| 26c00093 | 0.20095 | ni     | kufs-binding protein                                                 | um05503   | 0.08322 | ni     | putative protein                                                                             |
| 5d00051  | 0.20131 | ni     | hypothetical protein                                                 | um10715   | 0.08343 | K14850 | related to RRP6 - nucleolar protein required for efficient processing of pre-rRNA at site A2 |
| 18c00094 | 0.2015  | K07252 | RNA pseudouridylylase synthetases                                    | um01695   | 0.08356 | ni     | hypothetical protein                                                                         |
| 6d00057  | 0.20151 | ni     | hypothetical protein                                                 | um11734   | 0.08411 | K14563 | probable NOP1 - fibrillar                                                                    |
| 16d0046  | 0.20156 | K00615 | transketolase                                                        | um12316   | 0.08431 | ni     | conserved hypothetical protein                                                               |
| 8d00040  | 0.20168 | ni     | hypothetical protein                                                 | um06030   | 0.08441 | K08030 | GTP-binding protein                                                                          |
| 22d0089  | 0.20166 | ni     | nuclear transport receptor RANBP7/RANBP8                             | um10127   | 0.08448 | K02889 | probable 60s ribosomal protein L21-A                                                         |
| 22c00041 | 0.20177 | K12193 | vacuolar sorting protein VPS24                                       | um11397   | 0.08452 | ni     | putative protein                                                                             |
| 22d00200 | 0.20218 | K03317 | concentrative Na <sup>+</sup> -nucleoside cotransporter CNT1/CNT2    | um03669   | 0.08458 | K03885 | probable NADH dehydrogenase                                                                  |
| 3d00007  | 0.20247 | K09467 | hypothetical protein                                                 | um04194   | 0.08465 | ni     | probable LYS20 - homocitrate synthase                                                        |
| 20c00006 | 0.20286 | ni     | Ca <sup>2+</sup> -binding protein                                    | um02490   | 0.08473 | K08158 | probable FLR1 - Putative H. antipateri involved in multidrug resistance                      |
| 9c00370  | 0.20293 | ni     | WD40 protein                                                         | um10218   | 0.08522 | ni     | hypothetical protein                                                                         |
| 22d0142  | 0.20299 | ni     | WD40 repeat-containing protein LD2LT                                 | um00793   | 0.08533 | ni     | conserved hypothetical Ustilago-specific protein                                             |
| 9d00414  | 0.20291 | K01267 | aminopeptidase 1 zinc metalloproteinase                              | um10652   | 0.08535 | K01493 | related to DCD1 - deoxyxylate deaminase                                                      |
| 22d0143  | 0.20322 | K14811 | ATP-dependent RNA helicase                                           | 0.0855    | K14309  | ni     | related to NIC96 - nuclear pore protein                                                      |
| 9d00234  | 0.20227 | ni     | hypothetical protein                                                 | um10886   | 0.08555 | ni     | conserved hypothetical protein                                                               |
| 27c00017 | 0.20235 | K10590 | E3 ubiquitin protein ligase                                          | um11509   | 0.08556 | K14800 | conserved hypothetical protein                                                               |
| 7d00326  | 0.20243 | ni     | acyl-coA synthetase                                                  | um02496   | 0.08566 | K07047 | conserved hypothetical protein                                                               |
| 22d0168  | 0.20237 | ni     | hypothetical protein                                                 | um02947   | 0.08578 | ni     | related to SPO1 - BEH1 protein-binding protein                                               |
| 9d00382  | 0.20288 | ni     | hypothetical protein                                                 | um10968   | 0.08591 | ni     | probable VTC4 - Vacuolar Transporter Chaperone                                               |
| 18d00034 | 0.20291 | ni     | hypothetical protein                                                 | um03602   | 0.08601 | K07910 | probable Ras-related protein Rab-18                                                          |
| 18c00087 | 0.20291 | K00616 | transaldolase                                                        | um02955   | 0.08625 | K13199 | related to RAV38 protein                                                                     |
| 24d00055 | 0.20312 | ni     | protein disulfide isomerase                                          | um02275   | 0.0864  | ni     | related to PET127 - component of mitochondrial translation system                            |
| 4d00025  | 0.20321 | K03680 | translation initiation factor 2B, delta subunit                      | um11027   | 0.08681 | K08517 | probable SEC22 - synaptobrevin                                                               |
| 9c00182  | 0.20337 | K06664 | predicted E3 ubiquitin ligase                                        | um15068   | 0.08691 | ni     | conserved hypothetical protein                                                               |
| 16d00084 | 0.20373 | ni     | predicted transporter                                                | um03504   | 0.08704 | ni     | related to Purine-nucleoside phosphorylase                                                   |
| 14d00092 | 0.20382 | K00226 | dihydroorotate dehydrogenase                                         | um10361   | 0.08713 | K02923 | probable 60S ribosomal protein L38                                                           |
| 5c00152  | 0.20395 | K14310 | uncharacterized conserved protein                                    | um02373   | 0.08719 | ni     | putative protein                                                                             |
| 19c0109  | 0.20401 | ni     | hypothetical protein                                                 | um11308   | 0.08736 | K06067 | histone deacetylase                                                                          |
| 9c00039  | 0.20405 | K10134 | p53-mediated apoptosis protein EI24/PIG8                             | um10366.2 | 0.08743 | ni     | hypothetical protein                                                                         |
| 10c00003 | 0.20411 | ni     | flavonol reductase                                                   | um03997   | 0.08757 | K00589 | related to MET1 - siroheme synthase                                                          |
| 9c00119  | 0.20448 | K03247 | translocation initiation factor 3, subunit h                         | um11816   | 0.08763 | K16569 | related to gamma-tubulin complex component 2                                                 |
| 22c00096 | 0.20455 | K09539 | nucleolar ribonucleoprotein                                          | um10193   | 0.08785 | ni     | conserved hypothetical protein                                                               |
| 24d00030 | 0.20473 | K13336 | peroxisomal assembly factor PEX3                                     | um11132   | 0.08788 | K10773 | related to NTG1 - DNA repair protein                                                         |
| 8c00047  | 0.20488 | ni     | hypothetical protein                                                 | um10565   | 0.08802 | ni     | hypothetical protein                                                                         |
| 3d00011  | 0.20493 | ni     | hypothetical protein                                                 | um01418   | 0.08807 | K14307 | related to NUP49 - nuclear pore protein                                                      |
| 22d00220 | 0.20505 | ni     | uncharacterized conserved protein                                    | um04299   | 0.08808 | K15100 | probable succinyl-tRNA-ligase transporter                                                    |
| 9d00287  | 0.20513 | K15732 | TFIIJ-interacting CTD phosphatases                                   | um04286   | 0.08818 | ni     | hypothetical protein                                                                         |
| 7c00163  | 0.20517 | K00652 | 5-aminolevulinic synthase                                            | um00760   | 0.08824 | K00938 | related to ERG8 - phosphohomocysteine kinase                                                 |
| 10c00041 | 0.20518 | ni     | mRNA cleavage and polyadenylation factor I complex, subunit Rb       | um01735   | 0.08828 | K07890 | GTP-binding protein                                                                          |
| 8d00049  | 0.20533 | ni     | hypothetical protein                                                 | um00604   | 0.08852 | K12795 | related to SGT1 - subunit of SCF ubiquitin ligase complex                                    |
| 7d00058  | 0.20537 | K07008 | glucosamine 6-phosphate synthetase                                   | um06402   | 0.08855 | K02210 | probable DNA replication licensing factor                                                    |
| 26c00054 | 0.20554 | K01705 | aconitase/homoaconitase                                              | um11998   | 0.08856 | K14430 | probable PHO91 - similarity to Pho87p and Pho90p                                             |
| 22c00280 | 0.2056  | K01193 | beta-fructofuranosidase                                              | um03603   | 0.08859 | ni     | hypothetical protein                                                                         |
| 9c00128  | 0.20561 | K00931 | gamma-glutamyl kinase                                                | um05139   | 0.0886  | K02981 | probable 40S ribosomal protein S2                                                            |
| 9c00129  | 0.20567 | K10755 | transcription factor C, subunit RFC4                                 | um12190   | 0.08865 | ni     | conserved hypothetical protein                                                               |
| 3c00036  | 0.20568 | ni     | hypothetical protein                                                 | um00216   | 0.08881 | K10755 | probable RFC2 - DNA replication factor                                                       |
| 4c00006  | 0.20571 | ni     | membrane coat complex Retromer, subunit VPS26                        | um10895   | 0.08895 | K11584 | related to B56-delta regulatory subunit of protein phosphatase 2A                            |
| 8c00078  | 0.20575 | K12180 | COP9 signalosome, subunit CSN7                                       | um10201   | 0.08898 | ni     | hypothetical protein                                                                         |
| 20c0075  | 0.20585 | ni     | hypothetical protein                                                 | um11385   | 0.08931 | ni     | putative protein                                                                             |
| 22d0197  | 0.20601 | ni     | DHHC-type Zn-finger proteins                                         | um10392   | 0.0895  | ni     | conserved hypothetical protein                                                               |
| 16d00055 | 0.20609 | ni     | multicopper oxidases                                                 | um11763   | 0.08991 | ni     | related to acetylglucosylase                                                                 |
| 27d00075 | 0.20611 | K17338 | HVA22/DP1 gene product-related proteins                              | um04958   | 0.09058 | ni     | related to polyketide synthase                                                               |
| 9c00123  | 0.20612 | ni     | hypothetical protein                                                 | um04918.2 | 0.09077 | ni     | conserved hypothetical protein                                                               |
| 12c00308 | 0.20651 | ni     | predicted tubulin-tyrosine ligase                                    | 0.09101   | K00108  | ni     | related to Glucosyl transferase                                                              |
| 12c00079 | 0.20646 | K11098 | small nuclear ribonucleoprotein                                      | um03993   | 0.09114 | K12836 | related to splicing factor U2AF 35 kd subunit                                                |
| 7d00258  | 0.20658 | K01103 | fructose-6-phosphate 2-kinase                                        | um01304   | 0.0912  | K03660 | related to 8-oxoguanine DNA-glycosylase                                                      |
| 14d00081 | 0.20666 | K16938 | septin CDC10 and related P-loop GTPases                              | um06165   | 0.09122 | ni     | hypothetical protein                                                                         |
| 22d0104  | 0.20669 | ni     | hypothetical protein                                                 | um00714   | 0.09132 | K14015 | probable NPL4 - nuclear protein localization factor and ER translocation component           |
| 22d0067  | 0.20671 | ni     | predicted A1Pase                                                     | um02948   | 0.09137 | K11564 | conserved hypothetical protein                                                               |
| 26d00009 | 0.20676 | ni     | DNA-directed RNA polymerase III subunit                              | um02326   | 0.09141 | ni     | conserved hypothetical protein                                                               |
| 6d00132  | 0.20701 | K08139 | predicted transporter                                                | um06293   | 0.09153 | ni     | hypothetical protein                                                                         |
| 19c00069 | 0.20714 | ni     | hypothetical protein                                                 | um05745   | 0.09154 | K11374 | related to ELP2 - 29 kDa subunit of elongator and elongating RNA polymerase II holoenzyme    |
| 4d00006  | 0.20723 | ni     | WD40 repeat-containing protein                                       | um05927   | 0.09154 | ni     | putative protein                                                                             |
| 7d00078  | 0.2073  | ni     | molecular chaperone                                                  | um04211   | 0.09155 | ni     | conserved hypothetical protein                                                               |
| 9c00104  | 0.20731 | ni     | uncharacterized conserved protein                                    | um02493   | 0.09157 | K10908 | related to RPO41 - DNA-directed RNA polymerase                                               |
| 7d00032  | 0.20752 | K14812 | transcriptional effector CCR4-related protein                        | um06480   | 0.09158 | ni     | putative protein                                                                             |
| 25d00015 | 0.20754 | K04488 | iron binding protein involved in Fe-S cluster formation              | um11526   | 0.09159 | ni     | conserved hypothetical protein                                                               |
| 7c00014  | 0.20763 | K02134 | mitochondrial F1F0-ATP synthase, subunit delta/ATP16                 | um00958   | 0.0916  | ni     | conserved hypothetical protein                                                               |
| 27d00057 | 0.20781 | K14429 | amino acid transporters                                              | um01985   | 0.09163 | ni     | hypothetical protein                                                                         |
| 5c00107  | 0.20784 | ni     | hypothetical protein                                                 | um05159   | 0.09218 | K12848 | conserved hypothetical protein                                                               |
| 6c00068  | 0.2081  | ni     | hypothetical protein                                                 | um02985   | 0.09249 | ni     | conserved hypothetical protein                                                               |
| 9c00098  | 0.20819 | K05542 | tRNA-dihydroxylation synthase                                        | um06219   | 0.0925  | K10849 | related to dna excision repair protein ercc-1                                                |
| 8c00063  | 0.20833 | K17279 | protein involved in membrane traffic                                 | um12317   | 0.09252 | ni     | conserved hypothetical protein                                                               |
| 9c00343  | 0.20834 | ni     | hypothetical protein                                                 | um10498   | 0.09258 | ni     | putative protein                                                                             |
| 27c00046 | 0.20856 | ni     | hypothetical protein                                                 | um00235   | 0.09291 | K01210 | probable EXG1 - exo-beta-1                                                                   |
| 5d00001  | 0.20865 | ni     | hypothetical protein                                                 | um12244   | 0.09294 | K11086 | related to small nuclear ribonucleoprotein associated protein b                              |
| 25c00028 | 0.20871 | ni     | hypothetical protein                                                 | um05747   | 0.09299 | K10005 | related to SEC91 - component of the COP1I coat of ER-go golgi vesicles                       |
| 22d00283 | 0.20877 | ni     | hypothetical protein                                                 | um01634   | 0.09359 | K02885 | probable RPL19B - 60S large subunit ribosomal protein L19                                    |
| 6c00002  | 0.209   | ni     | hypothetical protein                                                 | um06460   | 0.09365 | ni     | probable fatty acid synthase                                                                 |
| 5d00072  | 0.20908 | K14558 | WD40-repeat-containing subunit of the 18S rRNA processing co         | um02786   | 0.09386 | ni     | hypothetical protein                                                                         |
| 12c00041 | 0.20919 | ni     | multicopper oxidases                                                 | um04413   | 0.0939  |        |                                                                                              |

|          |         |        |                                                                      |           |         |        |                                                                                           |
|----------|---------|--------|----------------------------------------------------------------------|-----------|---------|--------|-------------------------------------------------------------------------------------------|
| 22d00152 | 0.21155 | ni     | hypothetical protein                                                 | um06000   | 0.09718 | ni     | conserved hypothetical protein                                                            |
| 22c00106 | 0.21159 | K00706 | 1,3-beta-glucan synthase                                             | um03196   | 0.09728 | ni     | hypothetical protein                                                                      |
| 8c00031  | 0.21163 | K14861 | uncharacterized conserved protein                                    | um00332   | 0.09753 | K15201 | related to transcription factor TFIIC subunit                                             |
| 1c00032  | 0.21168 | ni     | hypothetical protein                                                 | um02854   | 0.09807 | ni     | putative protein                                                                          |
| 22c00057 | 0.21166 | K11230 | MAPKKK (MAP kinase kinase kinase) SSK2                               | um02854   | 0.09809 | ni     | hypothetical protein                                                                      |
| 3c00055  | 0.21187 | ni     | predicted mitochondrial/chloroplast ribosomal protein S17            | um03886   | 0.09816 | ni     | conserved hypothetical protein                                                            |
| 18d00096 | 0.212   | K16075 | magnesium transporters, CorA family                                  | um01091   | 0.0986  | K14767 | related to SAS10 - involved in silencing                                                  |
| 16c00026 | 0.21205 | ni     | hypothetical protein                                                 | um00865   | 0.09865 | ni     | hypothetical protein                                                                      |
| 22d00066 | 0.2121  | ni     | protein DRE2                                                         | um00292   | 0.0987  | K14791 | related to WD repeat protein PWP1                                                         |
| 7d00019  | 0.21211 | K04532 | NEDD8-activating complex, APP-BP1/UBA5 component                     | um01722.2 | 0.09909 | K11375 | probable PCS50 - AMP-binding protein                                                      |
| 6c00117  | 0.21245 | K10413 | cytoskeletal heavy chain                                             | um02552   | 0.09911 | ni     | putative protein                                                                          |
| 22d00264 | 0.21258 | ni     | predicted member of the intramitochondrial sorting protein family    | um00159   | 0.09912 | ni     | conserved hypothetical protein                                                            |
| 13c00021 | 0.21265 | K15116 | mitochondrial carrier protein - Rim2p/Mrs12p                         | um01246   | 0.09943 | K05756 | probable ARC18 - subunit of the Arp2                                                      |
| 6c00128  | 0.2128  | ni     | aldoketo reductase family proteins                                   | um12058   | 0.09943 | ni     | conserved hypothetical Ustilago-specific protein                                          |
| 1c00014  | 0.21282 | ni     | hypothetical protein                                                 | um11400   | 0.09946 | K03146 | probable Thiamin biosynthetic enzyme                                                      |
| 12d00041 | 0.21284 | K03259 | translational initiation factor 4F, cap-binding subunit              | um10289   | 0.09968 | K02153 | related to vacuolar ATP synthase subunit H                                                |
| 10d00023 | 0.21289 | ni     | cell cycle-associated protein Mob1-1                                 | um15080   | 0.09978 | ni     | conserved hypothetical protein                                                            |
| 11d00062 | 0.21301 | K03013 | RNA polymerase, 25-kDa subunit                                       | um03662   | 0.10003 | K05917 | sterol 14 alpha-demethylase                                                               |
| 16d00013 | 0.2131  | ni     | predicted mitochondrial rRNA                                         | um02468   | 0.10016 | ni     | conserved hypothetical protein                                                            |
| 19d00080 | 0.21315 | ni     | voltage-gated Ca2+ channels, alpha1 subunits                         | um00594   | 0.10016 | ni     | conserved hypothetical Ustilago-specific protein                                          |
| 27d00029 | 0.21327 | ni     | hypothetical protein                                                 | um05856.2 | 0.10021 | ni     | putative protein                                                                          |
| 22d00107 | 0.21345 | ni     | uncharacterized conserved protein                                    | um10399   | 0.10024 | ni     | related to C-type cyclin                                                                  |
| 7d000278 | 0.21351 | ni     | CCCH-type Zn-finger protein                                          | um11008   | 0.10025 | K15271 | related to HFM1 - DNA                                                                     |
| 9d00017  | 0.21353 | ni     | hypothetical protein                                                 | um02846.2 | 0.10041 | ni     | related to WD40 repeat protein CreC                                                       |
| 24d00029 | 0.21356 | K01426 | amidase                                                              | um03486   | 0.10058 | ni     | putative protein                                                                          |
| 10c00082 | 0.2136  | ni     | hypothetical protein                                                 | um05654   | 0.10062 | K07208 | probable ras-related GTP-binding protein                                                  |
| 20d00042 | 0.21376 | ni     | hypothetical protein                                                 | um01705   | 0.10066 | ni     | conserved hypothetical protein                                                            |
| 27d00078 | 0.21376 | K01784 | UDP-glucose 4-epimerase                                              | um03206   | 0.10071 | K00943 | related to thymidylate kinase                                                             |
| 20d00058 | 0.21394 | ni     | hypothetical protein                                                 | um11787   | 0.10082 | K14842 | probable NSA2 - involved in biogenesis of ribosomal large subunit                         |
| 19d00118 | 0.21408 | ni     | 17-beta-hydroxysteroid dehydrogenase type 3                          | um11423   | 0.10081 | ni     | conserved hypothetical protein                                                            |
| 5d00039  | 0.21417 | K03026 | 26S proteasome regulatory complex, subunit RPN1/PSMD2                | um00444   | 0.10106 | ni     | conserved hypothetical protein                                                            |
| 18c00033 | 0.21418 | ni     | cystathionine beta-lyases                                            | um05436   | 0.10113 | ni     | conserved hypothetical Ustilago-specific protein                                          |
| 15c00076 | 0.21427 | K00417 | ubiquitin cytochrome c reductase, subunit QCR7                       | um11766   | 0.1012  | ni     | conserved hypothetical protein                                                            |
| 9c00150  | 0.21438 | K02127 | mitochondrial F1FO-ATP synthase, subunit b/ATP4                      | um11052   | 0.10121 | K06875 | conserved hypothetical protein                                                            |
| 9c00150  | 0.21447 | K09008 | uncharacterized conserved nuclear protein                            | um05299   | 0.10149 | ni     | conserved hypothetical Ustilago-specific protein                                          |
| 18d00113 | 0.21451 | ni     | hypothetical protein                                                 | um11375   | 0.10156 | ni     | hypothetical protein                                                                      |
| 19d00071 | 0.21463 | ni     | hypothetical protein                                                 | um05163   | 0.10159 | K13127 | conserved hypothetical protein                                                            |
| 5d00146  | 0.21474 | ni     | hypothetical protein                                                 | um06401   | 0.1016  | ni     | conserved hypothetical protein                                                            |
| 9d00198  | 0.21485 | ni     | hypothetical protein                                                 | um02296   | 0.10186 | ni     | conserved hypothetical Ustilago-specific protein                                          |
| 22d00219 | 0.21517 | ni     | hypothetical protein                                                 | um02624   | 0.10193 | ni     | related to Alpha-1                                                                        |
| 24d00057 | 0.21526 | ni     | RNA-directed RNA polymerase QDE-1                                    | um02124   | 0.10207 | K00598 | conserved hypothetical protein                                                            |
| 19c00006 | 0.21541 | ni     | non-ribosomal peptide synthetase                                     | um10391   | 0.10218 | ni     | related to SK15 - protoplasm regeneration and killer toxin resistance protein             |
| 7c00271  | 0.21546 | ni     | hypothetical protein                                                 | um02274   | 0.10224 | ni     | conserved hypothetical protein                                                            |
| 20d00047 | 0.2155  | K10696 | E3 ubiquitin ligase involved in syntaxin degradation                 | um10701   | 0.10273 | K02922 | probable RPL37A - ribosomal protein L37                                                   |
| 12d00064 | 0.21555 | K03510 | DNA polymerase Iota                                                  | um05979   | 0.10298 | K00521 | related to ferric reductase                                                               |
| 10d00059 | 0.21556 | K01529 | ATP-dependent RNA helicase                                           | um10283   | 0.10304 | K00295 | related to MTD1 - methyleneretahydrofolate dehydrogenase                                  |
| 7c00320  | 0.21558 | ni     | hypothetical protein                                                 | um02528   | 0.10307 | ni     | conserved hypothetical protein                                                            |
| 9d00210  | 0.21561 | K02960 | 40S ribosomal protein S16                                            | um10740   | 0.10327 | K12668 | related to apoptotic cell death regulator DAD1                                            |
| 18c00056 | 0.21572 | K11835 | ubiquitin C-terminal hydrolase                                       | um00794   | 0.10338 | ni     | conserved hypothetical Ustilago-specific protein                                          |
| 9d00050  | 0.21573 | ni     | hypothetical protein                                                 | um05853   | 0.10344 | ni     | conserved hypothetical protein                                                            |
| 7d00294  | 0.21576 | ni     | hypothetical protein                                                 | um10866   | 0.10355 | K12858 | probable U5 snRNP 100 kD protein                                                          |
| 13c00033 | 0.21581 | K03949 | NAD-dependent oxidoreductase, NDUFA5/B13 subunit                     | um10192.2 | 0.10367 | ni     | related to U5 snRNP                                                                       |
| 8d00028  | 0.21592 | ni     | hypothetical protein                                                 | um04327   | 0.10376 | K10597 | related to UFD2 - ubiquitin fusion degradation protein                                    |
| 18d00026 | 0.21598 | K01895 | acyl-coa synthetase                                                  | um04134   | 0.10377 | ni     | probable methionine synthase                                                              |
| 22c00291 | 0.2161  | ni     | multifunctional protein                                              | um05832   | 0.10382 | K04078 | probable heat shock protein 10                                                            |
| 4d00016  | 0.21628 | K01956 | multifunctional pyrimidine synthesis protein CAD                     | um00669   | 0.10384 | K10842 | related to TFB3 - TFIIB subunit                                                           |
| 27c00067 | 0.21639 | K10756 | replicator C, subunit RFC5                                           | um04348   | 0.10387 | K14660 | conserved hypothetical protein                                                            |
| 9c00431  | 0.21649 | ni     | spliceosomal protein snRNP-U1A/U2B                                   | um03985   | 0.10405 | ni     | related to SIW14 - protein involved in actin filament organization                        |
| 10d00067 | 0.21663 | ni     | hypothetical protein                                                 | um05473   | 0.10405 | K15289 | conserved hypothetical protein                                                            |
| 11d00006 | 0.21676 | K05906 | hypothetical protein                                                 | um03017   | 0.10407 | ni     | putative protein                                                                          |
| 3c00060  | 0.21683 | ni     | hypothetical protein                                                 | um04683   | 0.10423 | K08991 | related to NMD5 - endonuclease involved in DNA repair and replication fork stability      |
| 8c00107  | 0.21699 | ni     | hypothetical protein                                                 | um01606   | 0.10423 | ni     | related to NMD5 - Nam7p interacting protein                                               |
| 20d00047 | 0.21705 | ni     | hypothetical protein                                                 | um11024   | 0.1044  | ni     | putative protein                                                                          |
| 5c00103  | 0.21711 | K01883 | cysteinyl-tRNA synthetase                                            | um12306   | 0.10465 | K15148 | related to MED7 - member of RNA Polymerase II transcriptional regulation mediator complex |
| 26c00017 | 0.21737 | ni     | predicted membrane protein                                           | um11768   | 0.10507 | ni     | hypothetical protein                                                                      |
| 9c00022  | 0.21745 | ni     | uncharacterized conserved protein                                    | um10711   | 0.10515 | K02984 | probable ribosomal protein S3aE                                                           |
| 14c00029 | 0.21746 | K11968 | predicted E3 ubiquitin ligase                                        | um11441   | 0.10542 | ni     | hypothetical protein                                                                      |
| 15c00013 | 0.21764 | K06173 | pseudouridylate synthase                                             | um01677   | 0.10543 | ni     | hypothetical protein                                                                      |
| 22d00216 | 0.21767 | ni     | hypothetical protein                                                 | um11479   | 0.10548 | K05758 | probable ARC35 - subunit of the Arp2                                                      |
| 15c00064 | 0.21774 | ni     | hypothetical protein                                                 | um05656   | 0.10566 | ni     | conserved hypothetical Ustilago-specific protein                                          |
| 22c00179 | 0.21786 | K07127 | transferrin and related proteins                                     | um10990   | 0.10566 | K01855 | related to DEG1 - pseudouridine synthase                                                  |
| 15d00049 | 0.21786 | ni     | hypothetical protein                                                 | um02252   | 0.10632 | K03241 | conserved hypothetical protein                                                            |
| 7d00333  | 0.21806 | ni     | hypothetical protein                                                 | um02730   | 0.10663 | ni     | conserved hypothetical protein                                                            |
| 27d00041 | 0.21847 | ni     | hypothetical protein                                                 | um01995   | 0.10676 | ni     | conserved hypothetical protein                                                            |
| 11d00163 | 0.21849 | ni     | hypothetical protein                                                 | um10271   | 0.1073  | ni     | conserved hypothetical protein                                                            |
| 11c00016 | 0.21856 | K00135 | aldehyde dehydrogenase                                               | um10118   | 0.10735 | ni     | conserved hypothetical protein                                                            |
| 24d00014 | 0.21865 | K15901 | hypothetical protein                                                 | um01830   | 0.1074  | ni     | related to alpha-aminoadipate reductase                                                   |
| 11c00053 | 0.21871 | ni     | hypothetical protein                                                 | um001274  | 0.10743 | K15305 | conserved hypothetical protein                                                            |
| 6c00121  | 0.21874 | ni     | hypothetical protein                                                 | um03488   | 0.10772 | ni     | related to SNF1-related protein kinase KIN10                                              |
| 18d00066 | 0.21881 | ni     | hypothetical protein                                                 | um15073   | 0.10778 | ni     | conserved hypothetical protein                                                            |
| 24d00027 | 0.21888 | ni     | hypothetical protein                                                 | um10570   | 0.10793 | ni     | conserved hypothetical protein                                                            |
| 22d00028 | 0.21889 | K12598 | nuclear exosomal RNA helicase MTR4                                   | um03645   | 0.10804 | ni     | related to beta-1                                                                         |
| 12d00141 | 0.21909 | ni     | hypothetical protein                                                 | um10356   | 0.10819 | K02739 | probable 20S proteasome beta2 subunit                                                     |
| 7d00354  | 0.21922 | ni     | hypothetical protein                                                 | um11933.2 | 0.10821 | ni     | putative protein                                                                          |
| 22c00213 | 0.21937 | ni     | hypothetical protein                                                 | um05959   | 0.10821 | ni     | conserved hypothetical protein                                                            |
| 9d00407  | 0.21953 | K07204 | guanine nucleotide binding protein MIP1                              | um10014   | 0.10848 | ni     | related to HMF1 - Heat-shock inducible inhibitor of cell Growth                           |
| 7d00133  | 0.21963 | ni     | hypothetical protein                                                 | um12128   | 0.10849 | ni     | conserved hypothetical protein                                                            |
| 24d00011 | 0.21969 | ni     | thiosulfonate-like protein                                           | um10452   | 0.10861 | K01322 | related to Prolyl endopeptidase                                                           |
| 9d00300  | 0.21986 | ni     | hypothetical protein                                                 | um00966   | 0.10868 | ni     | related to RAD26 - DNA repair and recombination protein                                   |
| 22c00039 | 0.22    | ni     | low density lipoprotein B-like protein                               | um04269   | 0.109   | ni     | conserved hypothetical protein                                                            |
| 6d00028  | 0.22003 | K11173 | alcohol dehydrogenase                                                | um05949   | 0.10912 | ni     | probable actin interacting protein 1                                                      |
| 22d00263 | 0.22005 | ni     | uncharacterized conserved protein                                    | um03617   | 0.10914 | K14861 | conserved hypothetical protein                                                            |
| 22d00269 | 0.22006 | ni     | hypothetical protein                                                 | um02091   | 0.10942 | K02935 | related to MRP1 - peptide chain release factor                                            |
| 3d00041  | 0.2202  | K06679 | mitotic checkpoint protein MAD1                                      | um15017   | 0.10944 | ni     | conserved hypothetical protein                                                            |
| 7d00110  | 0.22023 | K14833 | predicted protein involved in nuclear export of pre-ribosomes        | um11570   | 0.10969 | ni     | conserved hypothetical protein                                                            |
| 11d00034 | 0.22027 | ni     | aminopyridases of the M20 family                                     | um03024   | 0.10971 | ni     | related to subtilisin-like serine protease                                                |
| 15c00031 | 0.22037 | ni     | centromere-associated protein zw10                                   | um03622   | 0.10982 | K01802 | conserved hypothetical protein                                                            |
| 22c00138 | 0.22041 | ni     | Na+-independent Cl/HCO3 exchanger AE1                                | um01849   | 0.10992 | ni     | related to subtilisin-like protein                                                        |
| 7d00086  | 0.22049 | ni     | hypothetical protein                                                 | um02716   | 0.11014 | ni     | putative protein                                                                          |
| 9c00383  | 0.22057 | ni     | hypothetical protein                                                 | um04239   | 0.11025 | K03236 | probable TIF11 - translation initiation factor eIF1a                                      |
| 9d00179  | 0.22083 | ni     | hypothetical protein                                                 | um06191   | 0.11025 | ni     | conserved hypothetical protein                                                            |
| 5d00071  | 0.22083 | ni     | WD40-repeat-containing subunit of the 18S rRNA processing complex    | um03798   | 0.11037 | ni     | conserved hypothetical protein                                                            |
| 27d00024 | 0.22101 | ni     | predicted sugar kinase                                               | um02323   | 0.11037 | K13343 | related to PEX14 - peroxisomal protein involved in import - peroxin                       |
| 2d00030  | 0.22114 | ni     | FOG, Zn-finger                                                       | um00080   | 0.11042 | ni     | related to 5-oxoprolinase                                                                 |
| 22d00080 | 0.22142 | K07955 | GTP-binding ADP-ribosylation factor-like protein                     | um00174   | 0.1106  | K11292 | related to transcriptional regulator protein SPT6                                         |
| 15c00039 | 0.2215  | K14399 | RNA cleavage and polyadenylation factor (A)II complex, subunit 1     | um02471   | 0.11077 | ni     | related to Exportin 4                                                                     |
| 8d00110  | 0.22152 | ni     | hypothetical protein                                                 | um10767   | 0.11088 | ni     | related to DPH2 - diphtheria toxin resistance protein                                     |
| 25d00039 | 0.22157 | K02725 | 20S proteasome, regulatory subunit alpha type PSMA1/PRES             | um00507   | 0.11125 | K15128 | conserved hypothetical protein                                                            |
| 19d00145 | 0.22162 | K14300 | nuclear pore complex, Nup133 component                               | um12110   | 0.11154 | K02258 | probable COX11 - cytochrome-c oxidase assembly protein                                    |
| 7d00254  | 0.2217  | ni     | hypothetical protein                                                 | um12442   | 0.11188 | ni     | conserved hypothetical protein                                                            |
| 24d00036 | 0.22175 | K01814 | phosphoribosyltransferase-5-aminimidazole carboxamide ribonucleoside | um03798   | 0.11201 | K01867 | probable hypoxanthine-URA ligase                                                          |
| 9d00092  | 0.22183 | ni     | hypothetical protein                                                 | um03905   | 0.11202 | ni     | conserved hypothetical protein                                                            |
| 22d00036 | 0.22206 | ni     | hypothetical protein                                                 | um02403.2 | 0.11269 | K15322 | related to RNA splicing endonuclease beta subunit                                         |
| 5d00093  | 0.22208 | ni     | hypothetical protein                                                 | um06374   | 0.11272 | ni     | related to GRE2 - methylglyoxal reductase                                                 |
| 18d00034 | 0.22215 | ni     | hypothetical protein                                                 | um04405   | 0.11286 | K02546 | alpha-glucosidase II precursor                                                            |
| 1d00039  | 0.2222  | K04739 | cAMP-dependent protein kinase types I and II, regulatory subunit     | um11579   | 0.11296 | ni     | conserved hypothetical Ustilago-specific protein                                          |
| 2c00002  | 0.22234 | ni     | hypothetical protein                                                 | um03403.2 | 0.11297 | ni     | conserved hypothetical protein                                                            |
| 7d00351  | 0.22253 | ni     | predicted transporter                                                | um11653   | 0.11298 | K01764 | related to CYC3 - holocytochrome-c synthase                                               |
| 8c00014  | 0.22256 | ni     | hypothetical protein                                                 | um11204   | 0.11319 | K10686 | related to ubiquitin-activating enzyme                                                    |
| 22c00126 | 0.2226  | K06655 | protein kinase PCTAIRE and related kinases                           | um10850   | 0.11348 | ni     | putative protein                                                                          |
| 9c00040  | 0.22274 | ni     | hypothetical protein                                                 | um03676   | 0.11354 | K10877 | related to RAD54 - DNA-dependent ATPase of the Snf2p family                               |
| 8c00106  | 0.22304 | ni     | uncharacterized conserved protein                                    | um11722   | 0.11363 | ni     | probable YDJ1 - mitochondrial and ER import protein                                       |
| 7d00265  | 0.22307 | K12881 | RRM motif-containing protein                                         | um15004   | 0.11384 | K01638 | probable maleate synthase                                                                 |
| 15c00096 | 0.22318 | K04709 | protein transporter                                                  | um10330   | 0.11393 | K14209 | related to AV13 - Vacuolar transporter                                                    |
| 6d00008  | 0.2233  | ni     | acetylcholinesterase                                                 | um11883.2 | 0.11401 | ni     | putative protein                                                                          |
| 14c00107 | 0.22346 | K11087 | small nuclear ribonucleoprotein SMD1 and related snRNPs              | um01405   | 0.11409 | ni     | conserved hypothetical protein                                                            |
| 25c00058 | 0.22351 | K04513 | ras-related small GTPase                                             | um02384   | 0.1142  | ni     | a1-mating type protein Rba1                                                               |
| 7d00025  | 0.22367 | K03115 | casein kinase II, beta subunit                                       | um05649   | 0.11438 | ni     | conserved hypothetical protein                                                            |
| 9d00377  | 0.22372 | K14539 | predicted GTP-binding protein MMR1                                   | um04344   | 0.11439 | ni     | conserved hypothetical protein                                                            |
| 18d00060 | 0.22388 | K12669 | oligosaccharyltransferase, gamma subunit                             | um10113   | 0.1149  | ni     | conserved hypothetical protein                                                            |
| 9c00020  | 0.22392 | ni     | phytoene/squalene synthetase                                         | um02690   | 0.11491 | ni     | hypothetical protein                                                                      |
| 9d00306  | 0.22406 | ni     | FOG, RCC1 domain                                                     | um04428   | 0.11494 | ni     | conserved hypothetical protein                                                            |
| 22d00118 | 0.22407 | K01194 | ribosome                                                             | um02967   | 0.11501 | K12617 | related to PAT1 - topoisomerase II-associated protein                                     |
| 9c00291  | 0.22407 | ni     | hypothetical protein                                                 | um10013.2 | 0.11547 | ni     | related to Iglulonolactone oxidase                                                        |
| 2c00023  | 0.22432 | K      |                                                                      |           |         |        |                                                                                           |

|          |         |        |                                                                   |           |         |        |                                                                                           |
|----------|---------|--------|-------------------------------------------------------------------|-----------|---------|--------|-------------------------------------------------------------------------------------------|
| 10c00032 | 0.22785 | K12621 | predicted snRNP core protein                                      | um02295   | 0.11925 | ni     | conserved hypothetical Ustilago-specific protein                                          |
| 5000126  | 0.22869 | K14565 | ribosome biogenesis protein - Nop58p/Nop5p                        | um04498   | 0.11925 | ni     | putative protein                                                                          |
| 15000020 | 0.22875 | ni     | predicted oxidoreductase                                          | um11742   | 0.11941 | ni     | putative protein                                                                          |
| 70000381 | 0.22889 | K02914 | mitochondrial ribosomal protein L34                               | um07766   | 0.11949 | ni     | hypothetical protein                                                                      |
| 18c00142 | 0.22895 | K12183 | vacuolar sorting protein                                          | um05572   | 0.11957 | ni     | related to PCH2 - putative ATPase                                                         |
| 7000293  | 0.22901 | K01514 | oxopolyposphatases and related proteins                           | um02276   | 0.11979 | K02934 | probable 60S large subunit ribosomal protein L6                                           |
| 1600032  | 0.22902 | K01078 | multiple inositol polyphosphate phosphatase                       | um10811   | 0.12003 | K07955 | related to ARL1 - ADP-ribosylation factor                                                 |
| 7000073  | 0.22905 | ni     | hypothetical protein                                              | um05243   | 0.1201  | ni     | hypothetical protein                                                                      |
| 12c00070 | 0.2291  | ni     | transport protein particle TRAPP complex subunit                  | um00543   | 0.12018 | K11429 | conserved hypothetical protein                                                            |
| 6000065  | 0.2293  | ni     | hypothetical protein                                              | um05675   | 0.12036 | ni     | conserved hypothetical protein                                                            |
| 18c00004 | 0.22931 | K14319 | ran GTPase-activating protein                                     | um10241   | 0.12044 | K14778 | related to DBP8 - ATP-dependent RNA helicase                                              |
| 22c00223 | 0.22944 | K13289 | serine oxidoreductase                                             | um05105   | 0.12061 | K15105 | probable sulphate transport protein MtrI                                                  |
| 9000298  | 0.22963 | ni     | translational repressor Pumilio/PUF3                              | um02833   | 0.12073 | K12273 | related to SEC6B - ER protein-translocation complex chain                                 |
| 7000210  | 0.22966 | K00995 | phosphatidylglycerolphosphate synthase                            | um04471   | 0.12077 | ni     | conserved hypothetical protein                                                            |
| 20c00030 | 0.22966 | K02603 | origin recognition complex, subunit 1, and related proteins       | um01100   | 0.12091 | ni     | hypothetical protein                                                                      |
| 14000070 | 0.2297  | K16055 | trehalose-6-phosphate synthase component TPS1 and related su      | um05459   | 0.12104 | ni     | conserved hypothetical Ustilago-specific protein                                          |
| 7000187  | 0.22974 | ni     | hypothetical protein                                              | um00589   | 0.12111 | K14798 | related to LTV1 - low-temperature viability protein                                       |
| 19d00053 | 0.22979 | K08735 | mismatch repair ATPase MSH2                                       | um06407   | 0.12147 | ni     | probable VIP1 - actin cytoskeleton organization and biogenesis-related protein            |
| 05000227 | 0.2298  | ni     | hypothetical protein                                              | um12208   | 0.12158 | K02208 | related to SSN3 - cyclin-dependent CTD kinase                                             |
| 7000327  | 0.22983 | ni     | hypothetical protein                                              | um05708   | 0.1216  | ni     | conserved hypothetical protein                                                            |
| 11d00044 | 0.22986 | ni     | hypothetical protein                                              | um10523   | 0.12161 | ni     | conserved hypothetical protein                                                            |
| 9c00077  | 0.23001 | ni     | very-long-chain acyl-CoA dehydrogenase                            | um05869   | 0.12199 | K15109 | probable carnitine                                                                        |
| 12c00011 | 0.23005 | ni     | hypothetical protein                                              | um05358   | 0.12215 | ni     | hypothetical protein                                                                      |
| 5000064  | 0.23021 | ni     | hypothetical protein                                              | um04177.2 | 0.12222 | ni     | conserved hypothetical protein                                                            |
| 1300103  | 0.23032 | K10843 | RNA pRNA polymerase II transcription initiation/nucleotide excisi | um02292   | 0.12283 | ni     | conserved hypothetical protein                                                            |
| 9c00251  | 0.23051 | ni     | mRNA biogenesis protein                                           | um01576   | 0.12295 | ni     | conserved hypothetical protein                                                            |
| 7000322  | 0.2304  | ni     | GTPase-activating protein VRP                                     | um01105   | 0.12298 | K15628 | related to adrenoleukodystrophy protein                                                   |
| 5000008  | 0.23076 | K02146 | vacuolar H <sup>+</sup> -ATPase V0 sector, subunit d              | um03362   | 0.12339 | ni     | conserved hypothetical protein                                                            |
| 18c00026 | 0.23079 | ni     | glutathione S-transferase                                         | um11759   | 0.12386 | K16578 | conserved hypothetical protein                                                            |
| 22c00257 | 0.23088 | K06009 | ubiquitin C-terminal hydrolase UCHL1                              | um11511   | 0.1239  | ni     | putative protein                                                                          |
| 18d00002 | 0.23096 | ni     | hypothetical protein                                              | um02181   | 0.12411 | ni     | conserved hypothetical protein                                                            |
| 27d00047 | 0.23133 | K04409 | p21-activated serine/threonine protein kinase                     | um00800   | 0.12415 | ni     | probable PHO84 - Inorganic phosphate permease                                             |
| 70c00211 | 0.23141 | ni     | uncharacterized conserved protein                                 | um02864   | 0.12454 | ni     | related to Acetylcholinesterase precursor                                                 |
| 10d00105 | 0.23146 | K05687 | putative transcriptional regulator DJ-1                           | um11830   | 0.1246  | ni     | conserved hypothetical protein                                                            |
| 6000020  | 0.23157 | ni     | hypothetical protein                                              | um11218   | 0.12467 | K17417 | conserved hypothetical protein                                                            |
| 9c00332  | 0.2317  | ni     | uncharacterized conserved protein                                 | um01435   | 0.12469 | ni     | related to MCH4 - monocarboxylate transporter                                             |
| 9c00424  | 0.23186 | ni     | hypothetical protein                                              | um03371   | 0.12473 | ni     | conserved hypothetical protein                                                            |
| 22d00147 | 0.23193 | K07036 | predicted membrane proteins                                       | um04584   | 0.12479 | K01694 | probable tytophan synthase                                                                |
| 5c00023  | 0.23197 | ni     | hypothetical protein                                              | um00739   | 0.12482 | ni     | related to DNA repair protein rad18                                                       |
| 18c00145 | 0.23201 | ni     | hypothetical protein                                              | um03937   | 0.12504 | ni     | KH domain protein                                                                         |
| 14c00016 | 0.23205 | ni     | emp24(gp25L) family of membrane trafficking proteins              | um03424   | 0.1251  | ni     | conserved hypothetical protein                                                            |
| 6000081  | 0.23222 | ni     | ATPase component of ABC transporters with duplicated ATPase       | um10583   | 0.12521 | ni     | hypothetical protein                                                                      |
| 9c00081  | 0.23247 | ni     | hypothetical protein                                              | um12016   | 0.12525 | ni     | conserved hypothetical Ustilago-specific protein                                          |
| 70c01190 | 0.23251 | ni     | predicted membrane protein                                        | um01743   | 0.12526 | K13728 | related to mitotic spindle assembly checkpoint protein mad2b                              |
| 27c00058 | 0.23265 | K11827 | clathrin adaptor complex, small subunit                           | um04057   | 0.12534 | ni     | related to dihydroflavonol reductase                                                      |
| 7000301  | 0.23273 | ni     | FOG, Zn-finger                                                    | um11813   | 0.12564 | ni     | putative protein                                                                          |
| 15d00010 | 0.23278 | ni     | amine oxidase                                                     | um11608.2 | 0.12571 | ni     | hypothetical protein                                                                      |
| 16d00057 | 0.23283 | ni     | transport protein particle TRAPP complex subunit                  | um00522   | 0.12586 | ni     | putative protein                                                                          |
| 19c00090 | 0.23288 | K02919 | mitochondrial/chloroplast ribosomal protein L36                   | um03771   | 0.12588 | ni     | conserved hypothetical protein                                                            |
| 13d00064 | 0.23293 | ni     | guanine nucleotide-binding protein                                | um10426   | 0.12594 | ni     | transcription factor pacC                                                                 |
| 7000236  | 0.233   | ni     | hypothetical protein                                              | um00168   | 0.12602 | ni     | related to Cell division control protein 15                                               |
| 27c00061 | 0.23301 | ni     | hypothetical protein                                              | um05141   | 0.12618 | K03511 | related to DNA polymerase kappa                                                           |
| 5c00095  | 0.23304 | ni     | histidine pyrophosphokinase                                       | um05453   | 0.1262  | K15628 | related to Tyrosine specific protein phosphatase and dual specificity protein phosphatase |
| 14d00113 | 0.23316 | K03386 | alkyl hydroperoxide reductase                                     | um11576   | 0.12642 | K02142 | probable ATP1B - subunit I                                                                |
| 3c00046  | 0.23322 | K15110 | mitochondrial oxidocarboxylate carrier protein                    | um03448   | 0.12658 | K00784 | related to Ribonuclease Z                                                                 |
| 3c00009  | 0.23327 | K02202 | cdk activating kinase                                             | um11136   | 0.12663 | ni     | related to PFA4 - Palmitoyltransferase                                                    |
| 9c00373  | 0.23339 | ni     | mitochondrial import inner membrane translocase, subunit TIM13    | um02280   | 0.12665 | ni     | putative protein                                                                          |
| 27d00030 | 0.23364 | K12587 | exosomal 3' 5' exonuclease complex, subunit Rrp41                 | um01273   | 0.12686 | K07252 | related to CAH4 - required for full levels of dolichol-linked oligosaccharides            |
| 7000192  | 0.23344 | ni     | iron/ascorbate family oxidoreductases                             | um00052   | 0.12708 | ni     | putative protein                                                                          |
| 7000309  | 0.23346 | ni     | FOG, WD40 repeat                                                  | um03987   | 0.12713 | K06676 | related to BRN1 - protein required for chromosome condensation                            |
| 9c00256  | 0.23369 | K16342 | lysophospholipase                                                 | um12021   | 0.12717 | ni     | conserved hypothetical protein                                                            |
| 10c00057 | 0.23385 | ni     | hypothetical protein                                              | um11862   | 0.12737 | ni     | putative protein                                                                          |
| 14d00040 | 0.2341  | ni     | PHD Zn-finger proteins                                            | um10035   | 0.12742 | K09481 | probable protein transport protein sec61 beta subunit                                     |
| 7000296  | 0.23432 | K00653 | histone acetyltransferase                                         | um10341   | 0.12773 | ni     | conserved hypothetical protein                                                            |
| 7000296  | 0.23458 | K13102 | protein containing a U1-type Zn-finger and implicated in RNA spli | um05022   | 0.12775 | ni     | related to PKH1 - ser                                                                     |
| 14d00084 | 0.23464 | ni     | alkyl hydroperoxide reductase                                     | um05526   | 0.12784 | ni     | conserved hypothetical protein                                                            |
| 24c00018 | 0.23473 | K03963 | NADH:ubiquinone oxidoreductase                                    | um11388   | 0.12814 | K11670 | related to UBR1 - ubiquitin-specific protease                                             |
| 8000091  | 0.23497 | ni     | hypothetical protein                                              | um01138.2 | 0.12842 | K02427 | conserved hypothetical protein                                                            |
| 9c00016  | 0.23529 | K06916 | predicted ATPase                                                  | um04800   | 0.12856 | ni     | conserved hypothetical protein                                                            |
| 18d00002 | 0.23532 | ni     | hypothetical protein                                              | um00325   | 0.12858 | K06664 | related to peroxisome assembly protein cart1                                              |
| 18d00095 | 0.23539 | K11238 | rixa GTPase effector DIA/Diaphanous                               | um12167   | 0.1286  | ni     | conserved hypothetical protein                                                            |
| 9c00409  | 0.23545 | ni     | hypothetical protein                                              | um02599   | 0.12859 | ni     | related to lysophospholipase                                                              |
| 8000052  | 0.23552 | K00420 | hypothetical protein                                              | um02498   | 0.12867 | K13076 | related to delta-6 fatty acid desaturase                                                  |
| 19c00070 | 0.23562 | ni     | hypothetical protein                                              | um00907   | 0.12871 | K12177 | related to cop2 complex subunit 3                                                         |
| 7000121  | 0.23574 | K10768 | hypothetical protein                                              | um05600   | 0.12877 | ni     | probable UGA2 - succinate semialdehyde dehydrogenase                                      |
| 8c00058  | 0.23575 | ni     | hypothetical protein                                              | um10173   | 0.12915 | K05755 | probable ARP2                                                                             |
| 6c00027  | 0.23587 | ni     | uncharacterized conserved protein                                 | um02454   | 0.12917 | ni     | conserved hypothetical protein                                                            |
| 7000050  | 0.23593 | ni     | hypothetical protein                                              | um05182   | 0.12921 | ni     | hypothetical protein                                                                      |
| 12d00077 | 0.23616 | K01262 | xaa-pro aminopeptidase                                            | um02674   | 0.12934 | ni     | conserved hypothetical protein                                                            |
| 21c00002 | 0.23623 | ni     | hypothetical protein                                              | um04568   | 0.12946 | ni     | putative protein                                                                          |
| 9c00015  | 0.23634 | ni     | permease of the major facilitator superfamily                     | um02789   | 0.12965 | ni     | hypothetical protein                                                                      |
| 9c00415  | 0.23652 | ni     | hypothetical protein                                              | um11326   | 0.13008 | ni     | conserved hypothetical protein                                                            |
| 7000010  | 0.23653 | K03135 | transcription initiation factor TFIID, subunit TAF11              | um05265   | 0.13026 | ni     | hypothetical protein                                                                      |
| 26d00016 | 0.2366  | K02898 | 60S ribosomal protein L26                                         | um04259   | 0.13034 | ni     | conserved hypothetical protein                                                            |
| 26d00104 | 0.23666 | ni     | hypothetical protein                                              | um05800   | 0.13036 | K17413 | conserved hypothetical protein                                                            |
| 13d00024 | 0.23695 | ni     | rhogel GTPase                                                     | um01374   | 0.13039 | ni     | hypothetical protein                                                                      |
| 26d00035 | 0.23704 | ni     | hypothetical protein                                              | um02779   | 0.13052 | ni     | conserved hypothetical protein                                                            |
| 16c00054 | 0.23745 | K15205 | hypothetical protein                                              | um10530   | 0.1307  | ni     | hypothetical protein                                                                      |
| 5d00033  | 0.23748 | K05212 | GPI transamidase complex, GP116-PIG-T component                   | um05268   | 0.13086 | K14951 | conserved hypothetical protein                                                            |
| 16d00024 | 0.23754 | K11681 | SNF2 family DNA-dependent ATPase                                  | um11464   | 0.13094 | ni     | conserved hypothetical protein                                                            |
| 8c00030  | 0.23787 | ni     | glucose dehydrogenase                                             | um05829   | 0.13095 | K12877 | probable mago nashi protein                                                               |
| 15c00052 | 0.23794 | ni     | hypothetical protein                                              | um02128   | 0.13128 | ni     | conserved hypothetical protein                                                            |
| 16c00085 | 0.23827 | K00452 | 3-hydroxyanthranilate oxygenase HAAO                              | um01367   | 0.1317  | K11624 | probable alpha-adaptin C                                                                  |
| 29d00032 | 0.23828 | ni     | hypothetical protein                                              | um10101   | 0.13177 | K10734 | putative protein                                                                          |
| 14d00108 | 0.2383  | K16794 | WD40 repeat-containing protein                                    | um00290   | 0.13189 | K03507 | related to DNA topoisomerase II binding protein                                           |
| 9c00416  | 0.23835 | ni     | hypothetical protein                                              | um02758   | 0.132   | ni     | related to Chitinase A precursor                                                          |
| 11d00072 | 0.23878 | K03016 | RNA polymerase subunit 8                                          | um06491   | 0.13203 | K00565 | related to RNA                                                                            |
| 6c00023  | 0.23888 | ni     | hypothetical protein                                              | um04941   | 0.13208 | ni     | conserved hypothetical Ustilago-specific protein                                          |
| 24c00067 | 0.23896 | ni     | hypothetical protein                                              | um12130   | 0.13214 | K11098 | probable Small nuclear ribonucleoprotein F                                                |
| 70c0126  | 0.23896 | ni     | uncharacterized conserved protein                                 | um05533   | 0.13227 | ni     | related to EDE1 protein involved in endocytosis                                           |
| 70c0349  | 0.23897 | ni     | cdc42-interacting protein CIP4                                    | um00435   | 0.13244 | K02926 | related to 50S ribosomal protein L4                                                       |
| 19c00032 | 0.239   | ni     | diphthamide biosynthesis protein                                  | um11026   | 0.13273 | K16342 | related to phospholipase A2                                                               |
| 26d00002 | 0.2391  | ni     | hypothetical protein                                              | um00917   | 0.13288 | K12176 | putative protein                                                                          |
| 27c00028 | 0.23924 | K03065 | 26S proteasome regulatory complex                                 | um02541   | 0.13299 | ni     | putative protein                                                                          |
| 22c00136 | 0.23926 | ni     | hypothetical protein                                              | um00225   | 0.13304 | ni     | putative protein                                                                          |
| 24d00033 | 0.23938 | K08658 | prenyl protein protease                                           | um12013   | 0.13309 | K14799 | related to TSR1 - protein involved in 20S rRNA accumulation                               |
| 6d00019  | 0.23946 | ni     | hydroxysteroid 17-beta dehydrogenase 11                           | um05564   | 0.13311 | K10352 | related to E3-ubiquitin protein ligase TOM1                                               |
| 9c00197  | 0.23964 | K05284 | mannosyltransferase                                               | um00695   | 0.13314 | K12373 | putative exochitinase                                                                     |
| 18d00047 | 0.23976 | ni     | kinesin                                                           | um02239   | 0.13328 | ni     | hypothetical protein                                                                      |
| 9000182  | 0.23977 | K01900 | sucinyl-coa synthetase, beta subunit                              | um04370   | 0.13329 | ni     | conserved hypothetical protein                                                            |
| 18c00102 | 0.23982 | ni     | alpha-D-galactosidase                                             | um11847   | 0.13336 | ni     | conserved hypothetical Ustilago-specific protein                                          |
| 18d00099 | 0.23983 | ni     | UV radiation resistance associated protein                        | um04298   | 0.13343 | K03253 | related to PR1 - transition initiation factor eIF3 subunit                                |
| 12d00121 | 0.23998 | K13192 | proteins containing the RNA recognition motif                     | um03481   | 0.13355 | ni     | related to MLH3 - insertion and deletion mismatch repair protein                          |
| 70c00077 | 0.24001 | ni     | hypothetical protein                                              | um10962   | 0.13393 | ni     | conserved hypothetical protein                                                            |
| 27c00081 | 0.24002 | K09550 | molecular chaperone Prefoldin, subunit 4                          | um11733.2 | 0.13395 | K12621 | related to LSM2 - Sm-like                                                                 |
| 3d00066  | 0.24006 | K02903 | 60S ribosomal protein L28                                         | um02149   | 0.13402 | ni     | putative protein                                                                          |
| 6000035  | 0.24008 | ni     | hypothetical protein                                              | um04627   | 0.13404 | ni     | putative protein                                                                          |
| 5c00101  | 0.24031 | ni     | uncharacterized conserved protein                                 | um10885.2 | 0.13425 | ni     | putative protein                                                                          |
| 9c00313  | 0.24032 | ni     | hypothetical protein                                              | um02771   | 0.13429 | ni     | putative protein                                                                          |
| 9000244  | 0.24045 | ni     | transcription initiation factor IID subunit                       | um04768   | 0.13433 | ni     | probable SAC6 - actin filament bundling protein                                           |
| 20d00001 | 0.24045 | ni     | dehydrogenases with different specificities                       | um10112   | 0.13442 | ni     | conserved hypothetical protein                                                            |
| 10d00058 | 0.24059 | ni     | hypothetical protein                                              | um10775   | 0.13463 | ni     | conserved hypothetical protein                                                            |
| 8c00086  | 0.24075 | ni     | hypothetical protein                                              | um10937   | 0.13466 | ni     | conserved hypothetical protein                                                            |
| 16c00025 | 0.24082 | ni     | predicted small membrane protein                                  | um02645   | 0.13484 | K12859 | probable DIB1 - 17-kDa component of the U4                                                |
| 9c00073  | 0.24128 | ni     | hypothetical protein                                              | um01216   | 0.13494 | ni     | conserved hypothetical protein                                                            |
| 9c00209  | 0.24129 | ni     | permease of the major facilitator superfamily                     | um11048   | 0.13516 | ni     | conserved hypothetical protein                                                            |
| 24d00062 | 0.24134 | K08493 | V-SNARE                                                           | um00447   | 0.13534 | ni     | conserved hypothetical protein                                                            |
| 22d00207 | 0.24142 | K00641 | hypothetical protein                                              | um01853   | 0.13549 | ni     | related to antibiotic biosynthesis protein                                                |
| 11c00046 | 0.24146 | K14802 | P-type ATPase                                                     | um03442   | 0.13555 | K10592 | related to ubiquitin-protein ligase 1                                                     |
| 7000023  | 0.24164 | ni     | hypothetical protein                                              | um11273   | 0.13566 | K08676 | probable PFM1 - ATP-dependent protease                                                    |
| 27c00093 | 0.24183 | ni     | predicted phosphatase                                             | um10965.2 | 0.13559 | ni     | putative protein                                                                          |
| 5000124  | 0.24191 | K00088 | IMP dehydrogenase                                                 | um04372   | 0.13564 | K10413 | cytoplasmic dynein heavy chain 2                                                          |
| 24c00006 | 0.24202 | ni     | Ca2+/calmodulin-dependent protein kinase                          | um02312   | 0.13593 | ni     | ni                                                                                        |
| 70c0012  | 0.24215 | ni     | hypothetical protein                                              | um15083.2 | 0.13594 | ni     | conserved hypothetical protein                                                            |
| 7000350  | 0.24216 | ni     | hypothetical protein                                              | um00133   | 0.13599 | K01062 | related to acetylhydrolase                                                                |
| 22d00031 | 0.24219 | K05955 | protein farnesyltransferase, alpha subunit                        | um04421   | 0.13608 |        |                                                                                           |

|          |         |        |                                                                  |           |         |        |                                                                               |    |
|----------|---------|--------|------------------------------------------------------------------|-----------|---------|--------|-------------------------------------------------------------------------------|----|
| 5c00063  | 0.24432 | ni     | hypothetical protein                                             | um03083   | 0.13861 | ni     | conserved hypothetical protein                                                |    |
| 15c00066 | 0.24436 | K00728 | dolichyl-phosphate-mannose, protein O-mannosyl transferase       | um01181   | 0.1387  | ni     | conserved hypothetical protein                                                |    |
| 12c0134  | 0.24438 | ni     | hypothetical protein                                             | um10742   | 0.13889 | ni     | conserved hypothetical protein                                                |    |
| 16c0027  | 0.24452 | K04564 | manganese peroxidase dismutase                                   | um06504   | 0.1389  | ni     | conserved hypothetical protein                                                |    |
| 26c00042 | 0.24459 | ni     | hypothetical protein                                             | um15056   | 0.13894 | K01533 | related to CCC2 - copper resistance-associated P-type ATPase                  |    |
| 19c0024  | 0.24487 | ni     | 5' nucleotidase                                                  | um03720   | 0.13914 | K15117 | related to OAC1 - similarity to mitochondrial uncoupling proteins             |    |
| 26c00091 | 0.24496 | K01424 | asparaginase                                                     | um15029   | 0.1395  | K12948 | related to SPC3 - signal peptidase subunit                                    |    |
| 7c00306  | 0.24529 | ni     | hypothetical protein                                             | um03199   | 0.13967 | ni     | related to VP53 - subunit of VP51-54 complex                                  |    |
| 9c00002  | 0.24531 | ni     | hypothetical protein                                             | um04044   | 0.13962 | ni     | related to Glucose oxidase                                                    |    |
| 4c00012  | 0.24537 | ni     | hypothetical protein                                             | um02375   | 0.13964 | K14293 | probable karyopherin beta-1 subunit                                           |    |
| 22c00172 | 0.24548 | K00432 | glutathione peroxidase                                           | um11233   | 0.13973 | K02938 | probable RPL2A - ribosomal protein L8                                         |    |
| 13c00054 | 0.24525 | ni     | serine carboxypeptidase                                          | um10925   | 0.13973 | K11365 | conserved hypothetical protein                                                |    |
| 16c00019 | 0.24556 | K15289 | predicted membrane protein                                       | um12134   | 0.13979 | ni     | hypothetical protein                                                          |    |
| 14c00028 | 0.24558 | ni     | spindle pole body protein                                        | um05910   | 0.13994 | ni     | related to GRD19 protein                                                      |    |
| 22c00082 | 0.24562 | ni     | hypothetical protein                                             | um04317   | 0.1402  | ni     | conserved hypothetical protein                                                |    |
| 6c00078  | 0.24564 | ni     | hypothetical protein                                             | um01577   | 0.14027 | ni     | conserved hypothetical protein                                                |    |
| 20c00048 | 0.24568 | ni     | hypothetical protein                                             | um05213   | 0.14027 | K11314 | related to ADA2 - general transcriptional adaptor or co-activator             |    |
| 13c00078 | 0.24569 | ni     | hypothetical protein                                             | um01153   | 0.14035 | K14556 | related to DIP2 - Dom34p-interacting protein                                  |    |
| 14c00038 | 0.24598 | ni     | bola (bacterial stress-induced morphogen)-related protein        | um04048   | 0.1404  | ni     | conserved hypothetical protein                                                |    |
| 27c00082 | 0.24606 | K03842 | beta-1,4-mannosyltransferase                                     | um06395   | 0.14074 | K12580 | related to NOT3 - general negative regulator of transcription                 |    |
| 9c00272  | 0.24613 | ni     | phosphatidylinositol transfer protein PDR16 and related proteins | um06348   | 0.14075 | ni     | related to SCP160 - involved in control of mitotic chromosome transmission    |    |
| 16c00006 | 0.24626 | ni     | monocarboxylate transporter                                      | um06031   | 0.14084 | ni     | conserved hypothetical protein                                                |    |
| 25c00019 | 0.24626 | ni     | hypothetical protein                                             | um00059   | 0.14091 | K01011 | related to 3-mercaptopyruvate sulfurtransferase                               |    |
| 20c00033 | 0.24626 | K00948 | ribose-phosphate pyrophosphokinase                               | um06107   | 0.14102 | K03115 | related to casein kinase II beta subunit                                      |    |
| 7c00162  | 0.24639 | ni     | hypothetical protein                                             | um11880   | 0.14104 | K02905 | probable RPL29 - 60S large subunit ribosomal protein                          |    |
| 3c00071  | 0.24665 | K00789 | S-adenosylmethionine synthetase                                  | um02444   | 0.14117 | K01911 | conserved hypothetical protein                                                |    |
| 9c00325  | 0.24712 | ni     | hypothetical protein                                             | um02444   | 0.14123 | K14191 | probable rRNA                                                                 |    |
| 8c00004  | 0.24717 | ni     | hypothetical protein                                             | um03687   | 0.14129 | K05747 | related to Neural Wiskott-Aldrich syndrome protein                            |    |
| 25c00018 | 0.24719 | K07208 | ras-related GTPase                                               | um05555   | 0.14162 | ni     | conserved hypothetical protein                                                |    |
| 7c00261  | 0.24737 | ni     | hypothetical protein                                             | um11533   | 0.14169 | K02917 | probable RPL35B - ribosomal protein L35a                                      |    |
| 7c00189  | 0.24738 | K02427 | cell division protein FisJ                                       | um02789   | 0.1417  | K15147 | putative protein                                                              |    |
| 16c00055 | 0.24742 | ni     | Ca2/calmodulin-dependent protein kinase                          | um05724   | 0.1418  | ni     | putative protein                                                              |    |
| 7c00197  | 0.24786 | K06287 | hydroxyindole-O-methyltransferase                                | um00427   | 0.14181 | ni     | hypothetical protein                                                          |    |
| 19c00012 | 0.24805 | ni     | nuclear export receptor CSE1/CAS                                 | um05387   | 0.14197 | K14831 | probable MAK16 protein                                                        |    |
| 24c00007 | 0.24806 | ni     | predicted fumarylacetoacetate hydratase                          | um01241   | 0.14197 | ni     | putative protein                                                              |    |
| 3c00080  | 0.24817 | ni     | hypothetical protein                                             | um04510   | 0.14212 | ni     | hypothetical protein                                                          |    |
| 9c00364  | 0.24824 | ni     | hypothetical protein                                             | um05125   | 0.14218 | K01886 | probable glutamine-tRNA ligase                                                |    |
| 22c00252 | 0.24835 | K05607 | enoyl-coa hydratase                                              | um06493   | 0.1422  | ni     | conserved hypothetical protein                                                |    |
| 20c00083 | 0.24842 | K02729 | 26S proteasome, regulatory subunit alpha type PSMA5/PUP2         | um10530   | 0.14228 | ni     | putative protein                                                              |    |
| 6c00098  | 0.24845 | ni     | hypothetical protein                                             | um04478   | 0.14229 | K08150 | probable TR2 - myo-inositol transporter                                       |    |
| 16c00087 | 0.24846 | ni     | hypothetical protein                                             | um05541   | 0.1423  | ni     | conserved hypothetical protein                                                |    |
| 2c00002  | 0.24856 | K02136 | FOF1-type ATP synthase, gamma subunit                            | um00369   | 0.14259 | ni     | conserved hypothetical protein                                                |    |
| 25c00046 | 0.24863 | ni     | hypothetical protein                                             | um06029   | 0.14278 | K11380 | related to Perigrin                                                           |    |
| 9c00355  | 0.24869 | ni     | flavin-containing monooxygenase                                  | um12249   | 0.14281 | ni     | putative protein                                                              |    |
| 6c00130  | 0.24885 | ni     | aspartyl protease                                                | um11406   | 0.14291 | ni     | conserved hypothetical protein                                                |    |
| 13c00089 | 0.24895 | ni     | FOG, Predicted E3 ubiquitin ligase                               | um03805   | 0.14293 | ni     | conserved hypothetical protein                                                |    |
| 22c00226 | 0.24907 | ni     | hypothetical protein                                             | um04125   | 0.14321 | ni     | related to YRO2 - strong similarity to HSP30 heat shock protein Yro1p         |    |
| 20c00053 | 0.2492  | ni     | iron-sulfurase family oxidoreductases                            | um01022   | 0.14333 | ni     | conserved hypothetical protein                                                |    |
| 25c00076 | 0.24929 | ni     | mitochondrial tricarboxylate/dicarboxylate carrier proteins      | um05834   | 0.14372 | K04532 | related to aux-resistance protein                                             |    |
| 20c00011 | 0.24935 | K12827 | splicing factor 3a, subunit 3                                    | um01556   | 0.1443  | ni     | related to transcriptional activator Mut3p                                    |    |
| 14c00014 | 0.2494  | K11246 | hypothetical protein                                             | um10149   | 0.14431 | ni     | related to CIRBP - glycine-rich RNA-binding protein                           |    |
| 10c00078 | 0.24945 | K13950 | para-aminobenzoate (PABA) synthase ABZ1                          | um00263.2 | 0.14454 | ni     | related to carnitine                                                          |    |
| 9c00157  | 0.24982 | ni     | zinc finger and related molecular chaperones                     | um10935   | 0.14489 | ni     | probable DUB1 - RNA helicase of the DEAD box family                           |    |
| 12c00113 | 0.24986 | K14191 | ribosomal RNA adenine dimethylase                                | um02883   | 0.14463 | ni     | conserved hypothetical protein                                                |    |
| 22c00274 | 0.24994 | ni     | hypothetical protein                                             | um03294   | 0.14469 | ni     | hypothetical protein                                                          |    |
| 22c00087 | 0.25002 | ni     | protein containing repeated kelch motifs                         | um03327   | 0.14471 | ni     | conserved hypothetical protein                                                |    |
| 12c00068 | 0.25002 | K03031 | 26S proteasome regulatory complex, subunit RPN12/PSMD8           | um05799   | 0.14482 | ni     | hypothetical protein                                                          |    |
| 7c00102  | 0.25002 | ni     | putative transmembrane protein                                   | um02777   | 0.14502 | ni     | conserved hypothetical protein                                                |    |
| 7c00139  | 0.25027 | ni     | ovarian tumor-like cysteine protease                             | um05739   | 0.14511 | ni     | conserved hypothetical protein                                                |    |
| 19c00141 | 0.25041 | ni     | hypothetical protein                                             | um10712   | 0.14522 | ni     | conserved hypothetical protein                                                |    |
| 4c00023  | 0.25044 | ni     | uncharacterized membrane protein                                 | um03539   | 0.14542 | ni     | conserved hypothetical protein                                                |    |
| 5c00028  | 0.25068 | K00830 | alanine aminotransferase AGT1                                    | um14554   | 0.14542 | K02979 | probable ribosomal protein s28                                                |    |
| 14c00058 | 0.25068 | K03671 | thioredoxin                                                      | um10351   | 0.14578 | K04082 | related to Co-chaperone protein HscB                                          |    |
| 25c00037 | 0.25077 | ni     | rho-gpase activating protein                                     | um03872   | 0.14583 | K12189 | related to VPS25 - vacuolar protein sorting                                   |    |
| 6c00069  | 0.25083 | K00844 | hexokinase                                                       | um00123   | 0.14589 | ni     | related to L-lactate dehydrogenase                                            |    |
| 5c00010  | 0.25102 | K13953 | alcohol dehydrogenase                                            | um10640   | 0.14589 | ni     | 0.14589                                                                       | ni |
| 7c00074  | 0.25106 | K11870 | ubiquitin-specific protease                                      | um00885   | 0.14591 | K01881 | probable proline-RNA ligase                                                   |    |
| 7c00096  | 0.25119 | ni     | hypothetical protein                                             | um02284   | 0.14594 | K11309 | conserved hypothetical protein                                                |    |
| 10c00039 | 0.2512  | K03131 | transcription initiation factor TFIID, subunit TAF6              | um06053   | 0.14608 | ni     | related to TAP42 - component of the Tor signaling pathway                     |    |
| 7c00030  | 0.25128 | ni     | inositol polyphosphate multikinase, component of the ARGIR trans | um03850   | 0.14615 | K00264 | probable glutamate synthase                                                   |    |
| 12c00091 | 0.25131 | ni     | axial filamentation process protein ISF4                         | um03850   | 0.14615 | K00264 | related to HSS116 - RNA helicase of the DEAD box family                       |    |
| 7c00011  | 0.25167 | K02519 | mitochondrial translation initiation factor 2                    | um11655   | 0.14645 | ni     | conserved hypothetical protein                                                |    |
| 16c00019 | 0.25179 | ni     | translational regions of low-complexity                          | um03288   | 0.14665 | ni     | related to dna polymerase epsilon p17 subunit                                 |    |
| 7c00114  | 0.25189 | ni     | hypothetical protein                                             | um03802   | 0.1468  | K03131 | related to TAF6 - Subunit                                                     |    |
| 6c00115  | 0.25198 | ni     | cytosolic Ca2+-dependent cysteine protease (calpain), large sub  | um11560   | 0.14683 | ni     | putative protein                                                              |    |
| 16c00025 | 0.25202 | ni     | hypothetical protein                                             | um01454   | 0.14688 | ni     | conserved hypothetical protein                                                |    |
| 9c00156  | 0.25206 | ni     | hypothetical protein                                             | um05772   | 0.14692 | ni     | hypothetical protein                                                          |    |
| 9c00219  | 0.25216 | ni     | hypothetical protein                                             | um03574   | 0.14716 | ni     | putative protein                                                              |    |
| 9c00029  | 0.25226 | ni     | uncharacterized membrane protein                                 | um04859   | 0.14737 | ni     | related to PER1 protein                                                       |    |
| 22c00073 | 0.25236 | K17292 | beta-tubulin folding cofactor A                                  | um01816   | 0.14743 | K14864 | related to TRM7 - rRNA 2                                                      |    |
| 13c00017 | 0.25248 | K01469 | xenopuslase                                                      | um10873   | 0.14755 | K12584 | conserved hypothetical protein                                                |    |
| 27c00091 | 0.25249 | ni     | hypothetical protein                                             | um03317   | 0.14759 | ni     | related to PRM1 - Pheromone-regulated multispanning membrane protein          |    |
| 18c00075 | 0.25281 | ni     | transition initiation factor 2C                                  | um00134   | 0.14762 | ni     | hypothetical protein                                                          |    |
| 16c00034 | 0.25294 | ni     | animal-type fatty acid synthase and related proteins             | um10784   | 0.14775 | K14262 | conserved hypothetical protein                                                |    |
| 9c00162  | 0.25294 | ni     | vesicle trafficking protein Sly1                                 | um10834   | 0.14788 | K14779 | conserved hypothetical protein                                                |    |
| 11c00073 | 0.25298 | K01537 | Ca2+-transporting ATPase                                         | um00622   | 0.14801 | K03061 | probable RPT1 - 26S proteasome regulatory subunit                             |    |
| 27c00034 | 0.25302 | ni     | ubiquitin and ubiquitin-like proteins                            | um12141   | 0.14805 | ni     | hypothetical protein                                                          |    |
| 25c00057 | 0.25304 | ni     | hypothetical protein                                             | um04592   | 0.14826 | ni     | conserved hypothetical protein                                                |    |
| 6c00129  | 0.25315 | K02728 | ZnS proteasome, subunit Slt1                                     | um11785   | 0.14833 | K03857 | conserved hypothetical protein                                                |    |
| 9c00353  | 0.25326 | ni     | hypothetical protein                                             | um03472   | 0.14835 | ni     | hypothetical protein                                                          |    |
| 9c00145  | 0.25331 | K17261 | centromere-associated protein HEC1                               | um02077   | 0.14852 | K15053 | conserved hypothetical protein                                                |    |
| 22c00135 | 0.25331 | ni     | hypothetical protein                                             | um04761   | 0.14858 | K11290 | related to SET protein                                                        |    |
| 16c00081 | 0.25343 | ni     | hypothetical protein                                             | um03154   | 0.14887 | ni     | hypothetical protein                                                          |    |
| 15c00054 | 0.25345 | ni     | hypothetical protein                                             | um10804   | 0.14889 | K10610 | related to LIV-damaged DNA-binding protein                                    |    |
| 10c00071 | 0.25363 | K12585 | exosome 3'-5' exoribonuclease complex, subunit Rpl44/Dis3        | um11110   | 0.14892 | ni     | conserved hypothetical protein                                                |    |
| 15c00035 | 0.25371 | ni     | vacuolar assembly/sorting protein VPS9                           | um06337   | 0.1494  | K03114 | wee1 kinase                                                                   |    |
| 25c00025 | 0.25374 | ni     | hypothetical protein                                             | um04989   | 0.1495  | K10973 | related to RAD52 - recombination and DNA repair protein                       |    |
| 10c00027 | 0.25381 | K00889 | phosphatidylinositol-4-phosphate 5-kinase                        | um03471   | 0.14961 | K15458 | related to CAP155 - GTP- $\gamma$ -S-associating protein                      |    |
| 18c00068 | 0.25381 | ni     | hypothetical protein                                             | um05470   | 0.14976 | K08554 | related to Hsp90 co-chaperone Cdc37                                           |    |
| 4c00030  | 0.25385 | K08876 | protein kinase                                                   | um00109   | 0.15006 | K00863 | probable DAK2 - dihydroxyacetone kinase                                       |    |
| 19c00011 | 0.2541  | ni     | hypothetical protein                                             | um10770   | 0.15014 | K15109 | probable YMC1 - Protein of the mitochondrial carrier family                   |    |
| 16c00010 | 0.25419 | ni     | predicted translation elongation factor                          | um01645   | 0.15016 | K07195 | related to Exocyst complex component Exo70                                    |    |
| 22c00181 | 0.25437 | ni     | hypothetical protein                                             | um11058   | 0.15021 | ni     | conserved hypothetical protein                                                |    |
| 20c00069 | 0.2546  | ni     | hypothetical protein                                             | um01966   | 0.15029 | K00232 | related to Acyl-coenzyme A oxidase                                            |    |
| 22c00209 | 0.2546  | ni     | hypothetical protein                                             | um00475   | 0.15041 | ni     | conserved hypothetical protein                                                |    |
| 9c00255  | 0.25461 | K06883 | predicted GTPase                                                 | um00527   | 0.15068 | K03505 | related to DNA polymerase delta subunit 4                                     |    |
| 2c00001  | 0.2547  | K10627 | postreplicative repair protein RAD18                             | um11820   | 0.15086 | K04345 | CAMP-dependent protein kinase catalytic subunit                               |    |
| 19c00094 | 0.25487 | K14790 | FGF receptor activating protein 1                                | um01725   | 0.15093 | ni     | conserved hypothetical protein                                                |    |
| 8c00115  | 0.25495 | K06978 | hypothetical protein                                             | um04172.2 | 0.15103 | ni     | putative protein                                                              |    |
| 6c00122  | 0.25499 | ni     | hypothetical protein                                             | um04714   | 0.15105 | K10689 | related to TPT1 - tRNA 2                                                      |    |
| 10c00117 | 0.25499 | ni     | hypothetical protein                                             | um03330   | 0.15116 | ni     | conserved hypothetical protein                                                |    |
| 12c00015 | 0.25522 | ni     | hypothetical protein                                             | um11289   | 0.15138 | ni     | putative protein                                                              |    |
| 9c00101  | 0.25534 | ni     | hypothetical protein                                             | um04163   | 0.15142 | ni     | conserved hypothetical protein                                                |    |
| 19c00165 | 0.25537 | ni     | Zn2+-binding protein Melusin/RAR1                                | um05373   | 0.15149 | ni     | related to REG1 - regulatory subunit for protein phosphatase Glc7p            |    |
| 7c00092  | 0.25541 | ni     | hypothetical protein                                             | um03517   | 0.15154 | ni     | 0.15154                                                                       | ni |
| 10c00013 | 0.25543 | K07874 | GTPase RalGAP2                                                   | um15000.2 | 0.15155 | ni     | related to Ynm6                                                               |    |
| 13c00040 | 0.25562 | K15304 | ran-binding protein RANBP1 and related RanBP domain proteins     | um11681   | 0.15172 | ni     | conserved hypothetical protein                                                |    |
| 27c00079 | 0.25568 | K01771 | hypothetical protein                                             | um11138   | 0.15187 | ni     | hypothetical protein                                                          |    |
| 27c00048 | 0.25572 | K10661 | protein involved in mRNA turnover and stability                  | um11430   | 0.15208 | ni     | conserved hypothetical protein                                                |    |
| 7c00075  | 0.25585 | K16912 | nuclear protein                                                  | um01328   | 0.15221 | K00030 | probable IDH2 - isocitrate dehydrogenase                                      |    |
| 8c00062  | 0.25588 | K03164 | DNA topoisomerase type II                                        | um02556   | 0.15226 | ni     | conserved hypothetical protein                                                |    |
| 18c00089 | 0.25592 | ni     | hypothetical protein                                             | um11261   | 0.15237 | K02962 | probable RPS17B - ribosomal protein S17                                       |    |
| 9c00236  | 0.25618 | ni     | hypothetical protein                                             | um11272   | 0.15238 | ni     | conserved hypothetical protein                                                |    |
| 9c00428  | 0.25636 | ni     | phosphatidylserine-specific receptor PtdSerR                     | um06344   | 0.1525  | K01720 | probable 2-methylcitrate dehydratase                                          |    |
| 24c00042 | 0.2564  | ni     | hypothetical protein                                             | um01267   | 0.15256 | ni     | putative protein                                                              |    |
| 9c00305  | 0.25645 | K11365 | nuclear protein Ataxin-7                                         | um03796   | 0.15259 | K08832 | related to dis1-suppressing protein kinase dsk1                               |    |
| 15c00064 | 0.25662 | K01322 | predicted serine protease                                        | um03336   | 0.15261 | K13137 | related to UNR-interacting protein STRAP                                      |    |
| 16c00027 | 0.25671 | K14285 | RNA export factor NXT1                                           | um05624   | 0.15262 | ni     | putative protein                                                              |    |
| 5c00021  | 0.25671 | ni     | hypothetical protein                                             | um00990   | 0.15262 | ni     | conserved hypothetical protein                                                |    |
| 25c00064 | 0.25681 | K16261 | amino acid transporters                                          | um00309   | 0.15266 | K07575 | related to TMA20 - Protein putative involved in cytoplasmic ribosome function |    |
| 25c00038 | 0.25683 | K00540 | hypothetical protein                                             | um05261   | 0.15275 | ni     | MAP kinase pathway-interacting protein                                        |    |
| 9c00053  | 0.25685 | ni     | hypothetical protein                                             | um00288   | 0.1528  | K00566 | related to trna methyltransferase                                             |    |
| 22c00190 | 0.25715 | K01265 | putative methionine aminopeptidase                               | um00146   | 0.1529  | ni     | conserved hypothetical protein                                                |    |
| 15c00070 | 0.25722 | ni     | FOC, Arkylin repeat                                              | um02722   | 0.15293 | ni     | related to zinc finger protein white collar 2                                 |    |
| 9c00158  | 0.25747 | ni     | exocyst subunit - Sec1                                           |           |         |        |                                                                               |    |

|          |         |        |                                                                     |           |         |        |                                                                          |
|----------|---------|--------|---------------------------------------------------------------------|-----------|---------|--------|--------------------------------------------------------------------------|
| 2c00020  | 0.25932 | K08178 | hypothetical protein                                                | um05033   | 0.15527 | ni     | related to glucose                                                       |
| 8c00037  | 0.25937 | ni     | hypothetical protein                                                | um04184   | 0.15562 | ni     | putative protein                                                         |
| 19c0025  | 0.25942 | ni     | hypothetical protein                                                | um06159   | 0.15564 | K01599 | probable HEM12 - uroporphyrinogen decarboxylase                          |
| 11c0023  | 0.25947 | ni     | hypothetical protein                                                | um05331   | 0.15578 | K15267 | putative protein                                                         |
| 26c0065  | 0.26018 | ni     | hypothetical protein                                                | um11099   | 0.15579 | K01874 | probable MES1 - methionyl-tRNA synthetase                                |
| 22c0056  | 0.26027 | K03030 | 26S proteasome regulatory complex, subunit RPN11                    | um02111   | 0.15595 | ni     | related to triacylglycerol lipase precursor                              |
| 19c0034  | 0.26042 | ni     | hypothetical protein                                                | um12210   | 0.15617 | K15275 | related to HUT1 - involved in UDP-galactose transport to the Golgi lumen |
| 18c0010  | 0.26049 | K03014 | RNA-directed RNA polymerase, subunit K                              | um10178   | 0.15628 | ni     | conserved hypothetical protein                                           |
| 5000027  | 0.26056 | ni     | hypothetical protein                                                | um01523   | 0.1564  | ni     | conserved hypothetical protein                                           |
| 12c0060  | 0.26063 | K11353 | NADH:ubiquinone oxidoreductase, B16.6 subunit                       | um05267   | 0.15649 | ni     | putative protein                                                         |
| 27c0059  | 0.26073 | ni     | hypothetical protein                                                | um01999   | 0.15654 | ni     | conserved hypothetical protein                                           |
| 9c00299  | 0.26078 | ni     | conserved protein                                                   | um04475   | 0.15663 | ni     | conserved hypothetical protein                                           |
| 6k00047  | 0.26096 | K08073 | polynucleotide kinase 3' phosphatase                                | um04657   | 0.15676 | ni     | related to YTA7 - 26S proteasome subunit                                 |
| 11c00009 | 0.26104 | ni     | hypothetical protein                                                | um04543   | 0.15688 | K08287 | related to Protein kinase Ikh1                                           |
| 14c00083 | 0.26106 | ni     | hypothetical protein                                                | um06069   | 0.15689 | K15264 | conserved hypothetical protein                                           |
| 6c00105  | 0.26113 | K00074 | 3-hydroxyacyl-CoA dehydrogenase                                     | um11809   | 0.157   | ni     | putative protein                                                         |
| 2c00053  | 0.26114 | K03007 | DNA-directed RNA polymerase, subunit RPB10                          | um02821   | 0.15705 | ni     | hypothetical protein                                                     |
| 22c0028  | 0.26116 | ni     | hypothetical protein                                                | um00861   | 0.15708 | ni     | conserved hypothetical protein                                           |
| 11c00555 | 0.26119 | K05546 | glucosylase II catalytic (alpha) subunit                            | um11127   | 0.1572  | K14168 | conserved hypothetical protein                                           |
| 9k00042  | 0.26148 | K01950 | predicted NAD synthase                                              | um10004   | 0.1573  | ni     | related to a retinal short-chain dehydrogenase                           |
| 7c00017  | 0.26173 | K12877 | exon-exon junction complex, Magoh component                         | um01469   | 0.15738 | ni     | conserved hypothetical protein                                           |
| 24k0044  | 0.26188 | K14856 | protein required for actin cytoskeleton organization and cell cycle | um03261   | 0.15771 | ni     | conserved hypothetical protein                                           |
| 10c0069  | 0.26206 | ni     | hypothetical protein                                                | um10259   | 0.15784 | ni     | conserved hypothetical protein                                           |
| 13c00017 | 0.26215 | ni     | rho-associated                                                      | um03323   | 0.15788 | K11968 | probable Ariadne-1 protein                                               |
| 7k00357  | 0.26222 | ni     | hypothetical protein                                                | um04516.2 | 0.1583  | ni     | conserved hypothetical protein                                           |
| 3c00045  | 0.26231 | K01836 | phosphoglucomutase                                                  | um03985   | 0.15832 | K08294 | related to Ikk1 - MAP kinase kinase                                      |
| 6k00109  | 0.2624  | K10875 | DNA repair protein                                                  | um01552   | 0.15853 | ni     | related to ATPase family protein                                         |
| 14c00002 | 0.26252 | ni     | predicted transporter                                               | um04374   | 0.15865 | K00801 | farnesyl-diphosphate farnesyltransferase                                 |
| 24c00026 | 0.26257 | ni     | hypothetical protein                                                | um11042   | 0.15873 | K13162 | related to PBP2 - PAB1 binding protein                                   |
| 8c00077  | 0.26266 | K03687 | molecular chaperone of the GrpE family                              | um05794   | 0.1588  | ni     | probable YCF1 - Vacuolar full-size ABC transporter                       |
| 14c00066 | 0.26268 | K02365 | regulator of spindle pole body duplication                          | um04641   | 0.15884 | ni     | ni                                                                       |
| 22c00092 | 0.26308 | ni     | hypothetical protein                                                | um11317   | 0.15892 | K11778 | related to RER2 - cis-prenyltransferase                                  |
| 7c00002  | 0.26309 | ni     | FOG, Zn-finger                                                      | um05715   | 0.15904 | ni     | related to ACT1 - actin                                                  |
| 9c00228  | 0.26313 | ni     | hypothetical protein                                                | um10938   | 0.15913 | ni     | related to RPC10 - DNA-directed RNA polymerase I                         |
| 19c0134  | 0.26314 | ni     | hypothetical protein                                                | um03513   | 0.15913 | ni     | conserved hypothetical protein                                           |
| 10c00035 | 0.26328 | K11274 | WD40 repeat protein                                                 | um04389   | 0.15923 | K06669 | probable SMC3 - required for structural maintenance of chromosomes       |
| 9c00051  | 0.26331 | K00147 | gamma-glutamyl phosphate reductase                                  | um02954   | 0.15939 | K10997 | related to TOF1 - topoisomerase I interacting factor 1                   |
| 9k00189  | 0.26339 | ni     | cytoskeletal protein Adducin                                        | um10244   | 0.15949 | ni     | conserved hypothetical protein                                           |
| 14c00054 | 0.26347 | K01164 | ribonucleoside triphosphate (NTP) protein subunit                   | um02427   | 0.1595  | K03348 | related to negative regulator of mitosis                                 |
| 9c00335  | 0.26349 | ni     | hypothetical protein                                                | um03572   | 0.15951 | ni     | putative protein                                                         |
| 14c00113 | 0.26379 | ni     | hypothetical protein                                                | um01138   | 0.15953 | ni     | conserved hypothetical protein                                           |
| 19c00073 | 0.26386 | ni     | hypothetical protein                                                | um00867   | 0.15954 | K02957 | probable RPS22A - ribosomal protein S16a                                 |
| 7c00347  | 0.26396 | K00574 | hypothetical protein                                                | um00675   | 0.15977 | K12496 | conserved hypothetical protein                                           |
| 22c00206 | 0.26409 | K16219 | hydroxy-methyltransferase                                           | um11537   | 0.15978 | K02957 | probable RPL15A 60S large subunit ribosomal protein L15                  |
| 19c00129 | 0.26412 | ni     | predicted esterase                                                  | um12105   | 0.1598  | K02735 | probable PUP3 - 20S proteasome subunit beta3                             |
| 15c00038 | 0.26418 | K04354 | serine/threonine protein phosphatase 2A, regulatory subunit         | um06037   | 0.15982 | K11664 | conserved hypothetical protein                                           |
| 22d0106  | 0.26421 | K07827 | ras-related GTPase                                                  | um01063   | 0.15983 | K06890 | conserved hypothetical protein                                           |
| 10c00043 | 0.26423 | ni     | hypothetical protein                                                | um12128   | 0.15996 | ni     | conserved hypothetical protein                                           |
| 19c0147  | 0.26444 | K11269 | DNA replication checkpoint protein CHL12/CTF18                      | um00674   | 0.15997 | K01624 | probable FBA1 - fructose-bisphosphate aldolase                           |
| 6k00131  | 0.26446 | ni     | hypothetical protein                                                | um05562   | 0.16    | ni     | related to stress response protein rds1p                                 |
| 5c00083  | 0.26461 | K04712 | fatty acid desaturase                                               | um00371   | 0.16014 | ni     | putative protein                                                         |
| 9k00218  | 0.26468 | ni     | hypothetical protein                                                | um00646   | 0.1602  | K00326 | related to cytochrome-b5 reductase                                       |
| 12c00030 | 0.26502 | K11824 | vesicle-binding protein alpha-AP-2, alpha subunit                   | um10378   | 0.16038 | K12603 | related to CCR4 - component of the major cytoplasmic deadenylase         |
| 24c00014 | 0.26521 | ni     | hypothetical protein                                                | um03570   | 0.16042 | ni     | conserved hypothetical protein                                           |
| 18k00001 | 0.26536 | ni     | hypothetical protein                                                | um03132   | 0.16044 | ni     | conserved hypothetical protein                                           |
| 16d00033 | 0.26541 | ni     | GTP-binding protein GP-1                                            | um11977   | 0.16073 | K15109 | hypothetical protein                                                     |
| 25d00073 | 0.26551 | K00053 | hypothetical protein                                                | um04850   | 0.16075 | ni     | related to RRD1 - Resistant to Rapamycin Deletion                        |
| 22d0165  | 0.2656  | ni     | hypothetical protein                                                | um05194   | 0.16087 | ni     | conserved hypothetical protein                                           |
| 26c0047  | 0.26561 | ni     | hypothetical protein                                                | um11890   | 0.16101 | K13577 | probable DIC1 - Mitochondrial dicarboxylate carrier protein              |
| 9k00079  | 0.26565 | ni     | guanine nucleotide exchange factor                                  | um06465   | 0.16106 | ni     | putative protein                                                         |
| 6c00074  | 0.26569 | ni     | hypothetical protein                                                | um11828   | 0.16112 | K11404 | probable HOS2 - putative histone deacetylase                             |
| 12c00036 | 0.26575 | ni     | hypothetical protein                                                | um11155   | 0.16114 | ni     | conserved hypothetical protein                                           |
| 22c00294 | 0.26575 | ni     | thioredoxin binding protein TBP-2/DUP1                              | um04219.2 | 0.16143 | ni     | conserved hypothetical protein                                           |
| 9k00266  | 0.26576 | K03063 | 26S proteasome regulatory complex                                   | um00349.2 | 0.16154 | ni     | hypothetical protein                                                     |
| 26c00041 | 0.26588 | ni     | hypothetical protein                                                | um02282   | 0.16171 | ni     | conserved hypothetical protein                                           |
| 9k00392  | 0.26589 | K04392 | ras-related small GTPase                                            | um10082   | 0.16177 | K10427 | probable dynactin Arp1 p25 subunit RO12                                  |
| 26d00085 | 0.26591 | K01764 | polycytochrome c synthase                                           | um10322   | 0.162   | ni     | conserved hypothetical protein                                           |
| 8c00093  | 0.26601 | ni     | hypothetical protein                                                | um00353   | 0.16216 | ni     | conserved hypothetical protein                                           |
| 4k00031  | 0.26656 | K02137 | mitochondrial F1FO-ATP synthase, subunit OSCP/ATP5                  | um11973   | 0.16221 | ni     | probable NIT2 - nitriase                                                 |
| 19c0058  | 0.26662 | ni     | voltage-gated shaker-like K+ channel, subunit beta/KCNAB            | um00464   | 0.16236 | ni     | putative protein                                                         |
| 27c0039  | 0.26674 | K10704 | ubiquitin-conjugating enzyme E2                                     | um15125   | 0.1624  | ni     | putative protein                                                         |
| 27c00045 | 0.26709 | ni     | hypothetical protein                                                | um05693   | 0.16243 | K12462 | probable rho GDP dissociation inhibitor                                  |
| 14k00087 | 0.2671  | K03138 | hypothetical protein                                                | um00806   | 0.16249 | ni     | conserved hypothetical protein                                           |
| 8c00011  | 0.26724 | K08336 | protein conjugation factor                                          | um11819   | 0.16267 | K04713 | related to SUR2 - sphingosine hydroxylase                                |
| 3c00078  | 0.26728 | ni     | predicted FAD-dependent oxidoreductase                              | um03395   | 0.16271 | ni     | hypothetical protein                                                     |
| 10k00115 | 0.26731 | ni     | poly-binding proteins alphaCP-1 and related KH domain proteins      | um10022   | 0.16288 | ni     | conserved hypothetical protein                                           |
| 14c00064 | 0.26731 | K03033 | 26S proteasome regulatory complex, subunit RPN3/PSMD3               | um06055   | 0.16299 | K02941 | probable RPP0 - acidic ribosomal protein L10                             |
| 14c00122 | 0.26734 | ni     | FOG, Zn-finger                                                      | um11416   | 0.16314 | ni     | conserved hypothetical Ustilago-specific protein                         |
| 26d00056 | 0.2674  | ni     | hypothetical protein                                                | um01206   | 0.16323 | ni     | conserved hypothetical protein                                           |
| 22c0137  | 0.26743 | ni     | hypothetical protein                                                | um05433   | 0.16333 | K00728 | probable PNT4 - dolichyl-phosphate-mannose-protein O-mannosyltransferase |
| 19c00125 | 0.26772 | K07390 | glutaredoxin-related protein                                        | um02891   | 0.1634  | ni     | conserved hypothetical protein                                           |
| 9k00002  | 0.26793 | ni     | hypothetical protein                                                | um10225   | 0.16344 | ni     | related to Glia maturation factor                                        |
| 22d00007 | 0.26803 | ni     | hypothetical protein                                                | um11949   | 0.16346 | ni     | ni                                                                       |
| 7k00195  | 0.26829 | ni     | hypothetical protein                                                | um12120   | 0.16361 | ni     | hypothetical protein                                                     |
| 9k00001  | 0.26859 | ni     | hypothetical protein                                                | um00860.2 | 0.16363 | K12391 | golgi adaptor HAT1                                                       |
| 9c00211  | 0.26873 | ni     | hypothetical protein                                                | um10879   | 0.16374 | K07127 | conserved hypothetical protein                                           |
| 19d00060 | 0.26888 | K02955 | 40S ribosomal protein S14                                           | um03238   | 0.16401 | ni     | conserved hypothetical protein                                           |
| 9k00098  | 0.26903 | K12654 | bifunctional leukotriene A4 hydrolase                               | um01246   | 0.16406 | ni     | conserved hypothetical protein                                           |
| 10c00037 | 0.26907 | ni     | uncharacterized conserved protein                                   | um01716   | 0.16432 | ni     | conserved hypothetical protein                                           |
| 1k00015  | 0.26916 | ni     | hypothetical protein                                                | um05647   | 0.16435 | ni     | related to cation diffusion facilitator 10                               |
| 26c00023 | 0.26933 | ni     | hypothetical protein                                                | um03260   | 0.16468 | ni     | conserved hypothetical protein                                           |
| 3k00061  | 0.26933 | ni     | uncharacterized conserved protein                                   | um02431   | 0.16469 | ni     | conserved hypothetical protein                                           |
| 7c00020  | 0.2694  | K03544 | putative ATP-dependent Clp-type protease                            | um04314   | 0.16489 | K05765 | probable COP1 - cofillin                                                 |
| 9c00119  | 0.26945 | ni     | hypothetical protein                                                | um00131   | 0.1649  | ni     | related to NADPH quinone oxidoreductase homolog PIG3                     |
| 22c00251 | 0.26953 | K03596 | elongation factor-type GTP-binding protein                          | um02214.2 | 0.16491 | ni     | putative protein                                                         |
| 9k00352  | 0.26955 | ni     | hypothetical protein                                                | um05839   | 0.16514 | ni     | conserved hypothetical protein                                           |
| 1k00024  | 0.26956 | K01876 | asparryl-tRNA synthetase                                            | um11485   | 0.16535 | ni     | related to SNARE protein of Golgi compartment                            |
| 7c00252  | 0.26975 | ni     | uncharacterized conserved protein                                   | um03711   | 0.16535 | K00626 | acetoacetyl-CoA thiolase                                                 |
| 13d00083 | 0.26981 | ni     | hypothetical protein                                                | um11548   | 0.1654  | ni     | putative protein                                                         |
| 6k00012  | 0.26976 | ni     | predicted transporter                                               | um06341   | 0.16563 | K13335 | related to Peroxisomal membrane protein PEX16                            |
| 9c00379  | 0.26976 | ni     | hypothetical protein                                                | um04680   | 0.16567 | ni     | related to Monocarboxylate transporter                                   |
| 22c0161  | 0.26992 | ni     | hypothetical protein                                                | um04092   | 0.16581 | ni     | conserved hypothetical protein                                           |
| 9k00069  | 0.27002 | K14283 | hypothetical protein                                                | um04131   | 0.16582 | K14764 | probable COP1 - cofillin                                                 |
| 22d00258 | 0.27017 | ni     | hypothetical protein                                                | um01553   | 0.16594 | ni     | conserved hypothetical protein                                           |
| 18c00050 | 0.27029 | K01591 | uridine 5'-monophosphate synthase                                   | um02392   | 0.16599 | ni     | conserved hypothetical protein                                           |
| 27d00027 | 0.27031 | K08287 | LAMMER dual specificity kinases                                     | um03983   | 0.16609 | ni     | related to SEC65 - signal recognition particle subunit                   |
| 25d0004  | 0.27069 | K00818 | chaperonin complex component, TCP-1 subunit                         | um04413   | 0.1661  | K12860 | related to CEP1 - required during G2                                     |
| 19c00012 | 0.27039 | ni     | hsp90 co-chaperone CNS1                                             | um10543   | 0.16625 | ni     | related to nonribosomal peptide synthetase                               |
| 1k00013  | 0.27062 | ni     | hypothetical protein                                                | um11627   | 0.16627 | ni     | conserved hypothetical protein                                           |
| 14c00066 | 0.27079 | ni     | hypothetical protein                                                | um02962   | 0.16628 | ni     | conserved hypothetical protein                                           |
| 8c00116  | 0.2708  | ni     | hypothetical protein                                                | um05255   | 0.16648 | ni     | conserved hypothetical protein                                           |
| 26d0006  | 0.2708  | ni     | transcription factor MBF1                                           | um11076   | 0.16658 | ni     | conserved hypothetical protein                                           |
| 7c00160  | 0.27088 | K10573 | ubiquitin-protein ligase                                            | um11987   | 0.16662 | ni     | conserved hypothetical protein                                           |
| 18d00061 | 0.27095 | K17053 | predicted methyltransferase                                         | um06131   | 0.16672 | K10743 | related to 35 kDa ribonuclease H                                         |
| 16d00069 | 0.27113 | K10365 | F-actin capping protein, beta subunit                               | um05986   | 0.16682 | K02729 | probable PUP2 - 20S proteasome subunit                                   |
| 7c00123  | 0.27119 | K02141 | hypothetical protein                                                | um04609   | 0.16687 | K10747 | related to DNA helicase I                                                |
| 14c00039 | 0.27136 | ni     | hypothetical protein                                                | um04332   | 0.16696 | K09510 | related to DNA-like protein Psi                                          |
| 11k00024 | 0.2714  | K14026 | extracellular protein SEL-1 and related proteins                    | um04625   | 0.16715 | K14821 | conserved hypothetical protein                                           |
| 22d0110  | 0.27187 | ni     | FOG, Zn-finger                                                      | um10960   | 0.16746 | ni     | hypothetical protein                                                     |
| 16c0015  | 0.27205 | ni     | hypothetical protein                                                | um00908   | 0.16747 | ni     | conserved hypothetical protein                                           |
| 14c00134 | 0.27209 | ni     | hydroxysteroid 17-beta dehydrogenase 11                             | um00168   | 0.16776 | ni     | putative protein                                                         |
| 2k00045  | 0.27219 | ni     | heat shock transcription factor                                     | um11846   | 0.16778 | ni     | related to nucleoside hydrolase                                          |
| 6c00031  | 0.2722  | K00065 | reductases with broad range of substrate specificities              | um04214   | 0.16782 | K01591 | orotidine 5                                                              |
| 5k00077  | 0.27228 | K03843 | glycosyltransferase                                                 | um10614   | 0.16793 | K14292 | conserved hypothetical protein                                           |
| 14c00093 | 0.27234 | ni     | extracellular protein SEL-1 and related proteins                    | um11030   | 0.16825 | ni     | putative protein                                                         |
| 7k00037  | 0.2724  | ni     | hypothetical protein                                                | um04237   | 0.1684  | K00417 | probable ubiquinol-cytochrome-c reductase                                |
| 22d00008 | 0.27244 | ni     | predicted protein tyrosine phosphatase                              | um05515   | 0.16845 | ni     | hypothetical protein                                                     |
| 18d00052 | 0.27256 | ni     | hypothetical protein                                                | um06077   | 0.16859 | ni     | hypothetical protein                                                     |
| 22c00003 | 0.27263 | K02540 | DNA replication licensing factor, MCM2 component                    | um04419   | 0.16875 | ni     | related to CSR1 - phosphatidylinositol transfer protein                  |
| 9k00289  | 0.27269 | K09499 | chaperonin complex component, TCP-1 subunit                         | um10130   | 0.16877 | K01613 | related to RNA polymerase I nonense transcripts 1                        |
| 14c00022 | 0.27321 | K13137 | serine/threonine kinase receptor-associated protein                 | um06405   | 0.16882 | ni     | related to AMME syndrome candidate gene 1 protein                        |
| 26c00012 | 0.27332 | K03240 | translational initiation factor 2B, epsilon subunit                 | um10671   | 0.16889 | ni     | related to Plectin Yase B precursor                                      |
| 13d00075 | 0.27337 | K07562 | NMD protein affecting ribosome stability and mRNA decay             | um12131   | 0.16911 | ni     | probable human translationally-controlled tumor protein                  |
| 7k00083  | 0.27338 | ni     | hypothetical protein                                                | um01923   | 0.16923 | K03348 | related to 60S ribosomal protein L35                                     |
| 19c00130 | 0.27338 | ni     | predicted starch-binding protein                                    | um10966   | 0.16927 | ni     | related to JSN1 - RNA-binding protein                                    |
| 2k00052  | 0.27354 | K12871 |                                                                     |           |         |        |                                                                          |

|          |         |        |                                                                      |           |         |        |                                                                                                  |
|----------|---------|--------|----------------------------------------------------------------------|-----------|---------|--------|--------------------------------------------------------------------------------------------------|
| 26c00050 | 0.27542 | K01783 | D-ribulose-5-phosphate 3-epimerase                                   | um03241   | 0.17197 | K06961 | probable KRR1 - required for 40S ribosome biogenesis                                             |
| 15d00034 | 0.27556 | ni     | copper transporter                                                   | um02482   | 0.17205 | ni     | conserved hypothetical protein                                                                   |
| 19d00152 | 0.27557 | K01128 | sphingosylcholine family protein                                     | um02613   | 0.17207 | K01883 | probable cystanyl-RNA synthetase                                                                 |
| 27c00031 | 0.27592 | ni     | growth hormone-induced protein and related proteins                  | um03941   | 0.17224 | K08852 | related to RE1 - protein kinase                                                                  |
| 27c00090 | 0.27588 | K03593 | predicted ATPase                                                     | um06503   | 0.1725  | ni     | conserved hypothetical protein                                                                   |
| 20c00076 | 0.27592 | ni     | hypothetical protein                                                 | um06360   | 0.17252 | K12845 | probable SNU13 - component of the U4                                                             |
| 14d00006 | 0.27596 | ni     | hypothetical protein                                                 | um02718   | 0.17257 | K15255 | related to PIFI1 - DNA helicase involved in mitochondrial DNA repair and telomere length control |
| 22d00181 | 0.27629 | ni     | hypothetical protein                                                 | um03529   | 0.1727  | K04371 | MAP kinase                                                                                       |
| 22c00201 | 0.27646 | ni     | predicted mutarotase                                                 | um00775   | 0.17289 | K10581 | conserved hypothetical protein                                                                   |
| 22c00029 | 0.27665 | K11599 | hypothetical protein                                                 | um10267   | 0.1729  | ni     | conserved hypothetical protein                                                                   |
| 7d00116  | 0.27671 | K03232 | elongation factor 1 beta/delta chain                                 | um05109   | 0.17296 | ni     | related to ECM14 - involved in cell wall biogenesis and architecture                             |
| 10d00049 | 0.27683 | ni     | uncharacterized conserved protein                                    | um04678   | 0.17339 | ni     | conserved hypothetical protein                                                                   |
| 28d00099 | 0.27684 | ni     | amino acid transporters                                              | um10950   | 0.1734  | ni     | hypothetical protein                                                                             |
| 6d00058  | 0.27687 | ni     | hypothetical protein                                                 | um11188   | 0.17348 | ni     | conserved hypothetical Ustilago-specific protein                                                 |
| 26d00039 | 0.27699 | ni     | hypothetical protein                                                 | um12284   | 0.17349 | K12883 | probable nuclear cap binding protein subunit 2                                                   |
| 22d00134 | 0.27705 | ni     | predicted hydrolase related to diene lactone hydrolase               | um11335   | 0.17365 | ni     | hypothetical protein                                                                             |
| 14d00112 | 0.27713 | ni     | extracellular protein SEL-1 and related proteins                     | um02977   | 0.17385 | ni     | conserved hypothetical protein                                                                   |
| 14d00057 | 0.27733 | ni     | hypothetical protein                                                 | um10352   | 0.17388 | ni     | conserved hypothetical protein                                                                   |
| 27c00062 | 0.27735 | K03094 | SCF ubiquitin ligase, Skp1 component                                 | um06326   | 0.174   | ni     | conserved hypothetical protein                                                                   |
| 11c00031 | 0.27747 | ni     | uridine permease                                                     | um02603   | 0.17403 | ni     | related to Myosin heavy chain                                                                    |
| 9d00081  | 0.27755 | ni     | hypothetical protein                                                 | um02163   | 0.17403 | ni     | hypothetical protein                                                                             |
| 22d00204 | 0.27763 | ni     | hypothetical protein                                                 | um04164   | 0.17414 | ni     | conserved hypothetical protein                                                                   |
| 9c00375  | 0.27782 | K11131 | pseudouridine synthase                                               | um03550   | 0.17433 | K03011 | related to RPB3 - DNA-directed RNA polymerase II chain                                           |
| 5c00156  | 0.27783 | K02974 | 40S ribosomal protein S24                                            | um05807   | 0.17453 | ni     | related to KRE6 - glucan synthase subunit                                                        |
| 25d00011 | 0.27792 | K03965 | hypothetical protein                                                 | um05614   | 0.17461 | ni     | conserved hypothetical protein                                                                   |
| 4c00026  | 0.27824 | K15156 | protein tyrosine receptor-associated coactivator complex component   | um05204   | 0.17463 | K01112 | conserved hypothetical protein                                                                   |
| 5c00135  | 0.2781  | ni     | hypothetical protein                                                 | um02576   | 0.17466 | ni     | related to Sterol regulatory element binding protein cleavage-activating protein                 |
| 6c00005  | 0.27813 | K08141 | predicted transporter                                                | um01010   | 0.17479 | ni     | putative protein                                                                                 |
| 9d00327  | 0.27828 | K11404 | histone deacetylase complex, catalytic component RPD3                | um05319   | 0.17486 | ni     | conserved hypothetical Ustilago-specific protein                                                 |
| 26d00052 | 0.27833 | K01620 | threonine aldolase                                                   | um03980   | 0.17492 | ni     | conserved hypothetical protein                                                                   |
| 22c00148 | 0.27846 | ni     | hypothetical protein                                                 | um05191   | 0.17519 | K11322 | related to EPL1 - Component of histone H4                                                        |
| 7d00079  | 0.27862 | ni     | hypothetical protein                                                 | um04069   | 0.17521 | K10843 | probable SSL2 - DNA helicase                                                                     |
| 2c00010  | 0.27862 | K03163 | DNA topoisomerase I                                                  | um10539   | 0.17529 | K00804 | related to farnesyltransferase                                                                   |
| 8d00067  | 0.27871 | K02216 | checkpoint kinase                                                    | um02665   | 0.17541 | K03113 | probable translation initiation factor SU11                                                      |
| 25d00093 | 0.27875 | K08141 | predicted transporter                                                | um04592   | 0.17545 | ni     | hypothetical protein                                                                             |
| 22d00071 | 0.27887 | K07556 | F1-ATP synthase assembly protein                                     | um02251   | 0.1755  | ni     | conserved hypothetical Ustilago-specific protein                                                 |
| 25d00009 | 0.27898 | ni     | hypothetical protein                                                 | um04120   | 0.17554 | ni     | hypothetical protein                                                                             |
| 19d00091 | 0.27898 | K11270 | hypothetical protein                                                 | um05627   | 0.17564 | K07101 | related to XPT1 - xanthine phosphoribosyl transferase                                            |
| 7d00034  | 0.27924 | K02736 | 20S proteasome, regulatory subunit beta type PSMB4/PR4               | um03520   | 0.17575 | K11501 | conserved hypothetical protein                                                                   |
| 11d00054 | 0.27934 | ni     | Na <sup>+</sup> /K <sup>+</sup> transporter                          | um00298   | 0.17596 | K11836 | related to ubiquitin-specific processing protease                                                |
| 18c00101 | 0.27937 | ni     | hypothetical protein                                                 | um04518   | 0.17618 | K10590 | related to UFD4 - Ubiquitin-protein ligase                                                       |
| 11c00003 | 0.27948 | ni     | hypothetical protein                                                 | um02407   | 0.17627 | K15634 | related to thymidylate synthase                                                                  |
| 19d00112 | 0.27955 | ni     | hypothetical protein                                                 | um01958.2 | 0.17632 | ni     | putative protein                                                                                 |
| 19d00052 | 0.27966 | ni     | predicted integral ATPase MSH2                                       | um11614   | 0.17635 | ni     | related to TOM5 - mitochondrial outer membrane protein                                           |
| 2c00032  | 0.27984 | K10884 | DNA-binding subunit of a DNA-dependent protein kinase                | um04579   | 0.17641 | ni     | related to TRX2 - thioredoxin II                                                                 |
| 18d00032 | 0.27985 | K03236 | translation initiation factor 1A                                     | um11825   | 0.17688 | ni     | conserved hypothetical protein                                                                   |
| 14c00074 | 0.28003 | K11319 | chromatin remodeling protein                                         | um11313   | 0.17704 | K03650 | related to MSS1 - mitochondrial GTPase involved in expression of COX1                            |
| 27c00020 | 0.28011 | ni     | hypothetical protein                                                 | um04587   | 0.17711 | ni     | hypothetical protein                                                                             |
| 6d00084  | 0.28014 | ni     | hypothetical protein                                                 | um05224   | 0.17731 | ni     | related to Muskellin                                                                             |
| 22c00059 | 0.28029 | ni     | predicted protein carboxyl methylase                                 | um12322   | 0.17742 | ni     | hypothetical protein                                                                             |
| 5c00069  | 0.2803  | ni     | hypothetical protein                                                 | um10646   | 0.17743 | K14686 | related to CTR2 - Protein involved in copper transport                                           |
| 26d00046 | 0.28033 | K02265 | cytochrome c oxidase, subunit Vb/COX4                                | um10806   | 0.1777  | ni     | conserved hypothetical protein                                                                   |
| 7d00071  | 0.28034 | K01304 | hypothetical protein                                                 | um11360   | 0.17772 | K16732 | conserved hypothetical protein                                                                   |
| 7c00179  | 0.28054 | ni     | pattern-formation protein                                            | um01443   | 0.17782 | ni     | conserved hypothetical Ustilago-specific protein                                                 |
| 11d00064 | 0.28057 | ni     | nuclear polyadenylated RNA binding protein                           | um10680   | 0.17808 | ni     | conserved hypothetical protein                                                                   |
| 18d00046 | 0.28071 | ni     | hypothetical protein                                                 | um10093   | 0.17815 | ni     | putative protein                                                                                 |
| 8d00026  | 0.28071 | ni     | hypothetical protein                                                 | um05494   | 0.17822 | ni     | related to secretory pathway protein                                                             |
| 24c00044 | 0.28073 | ni     | hypothetical protein                                                 | um01948   | 0.17826 | K01881 | related to prolyl-RNA synthetase                                                                 |
| 9d00260  | 0.28076 | K09705 | hypothetical protein                                                 | um04186   | 0.17828 | ni     | ni                                                                                               |
| 9d00066  | 0.28081 | ni     | hypothetical protein                                                 | um00031   | 0.17835 | ni     | conserved hypothetical protein                                                                   |
| 5c00009  | 0.28089 | ni     | hypothetical protein                                                 | um00160   | 0.1785  | K15296 | probable SEC17 - transport vesicle fusion protein                                                |
| 15d00083 | 0.2809  | ni     | hypothetical protein                                                 | um05603   | 0.17854 | ni     | conserved hypothetical protein                                                                   |
| 22d00253 | 0.28122 | ni     | hypothetical protein                                                 | um05218   | 0.17882 | ni     | conserved hypothetical protein                                                                   |
| 26c00027 | 0.28125 | ni     | hypothetical protein                                                 | um11253   | 0.17883 | ni     | conserved hypothetical protein                                                                   |
| 22c00276 | 0.28134 | ni     | hypothetical protein                                                 | um02206   | 0.179   | ni     | conserved hypothetical protein                                                                   |
| 9d00344  | 0.28136 | K14843 | protein required for normal rRNA processing                          | um06268   | 0.17912 | ni     | conserved hypothetical protein                                                                   |
| 5c00129  | 0.2814  | ni     | putative cargo transport protein EMP24                               | um04158   | 0.1792  | K14794 | related to RPL12 - Protein required for normal pre-rRNA Processing                               |
| 20d00063 | 0.28142 | ni     | hypothetical protein                                                 | um10256   | 0.17929 | ni     | conserved hypothetical protein                                                                   |
| 9c00434  | 0.28147 | K11788 | glycinamide ribonucleotide synthetase                                | um02589   | 0.17941 | ni     | hypothetical protein                                                                             |
| 10d00030 | 0.28152 | ni     | hypothetical protein                                                 | um02022   | 0.17951 | ni     | conserved hypothetical protein                                                                   |
| 3c00035  | 0.28155 | ni     | hypothetical protein                                                 | um12035   | 0.17998 | ni     | putative protein                                                                                 |
| 13c00074 | 0.28157 | ni     | RNA nucleotidyltransferase                                           | um00347   | 0.18006 | ni     | related to Tubulin-folding cofactor D                                                            |
| 11d00055 | 0.28163 | ni     | predicted membrane protein                                           | um06181   | 0.18008 | ni     | Mig2-5                                                                                           |
| 15d00029 | 0.28163 | K02132 | F0F1-type ATP synthase, alpha subunit                                | um02592   | 0.18032 | ni     | related to 2-hydroxy-3-oxopropionate reductase                                                   |
| 18d00022 | 0.28163 | K03130 | transcription initiation factor TFIID, subunit TAF5                  | um10765   | 0.18036 | K15448 | conserved hypothetical protein                                                                   |
| 26d00086 | 0.28168 | ni     | predicted hydrolase                                                  | um01074   | 0.18037 | ni     | conserved hypothetical protein                                                                   |
| 26d00028 | 0.28214 | K15026 | hypothetical protein                                                 | um10110   | 0.18048 | K02920 | probable 60S ribosomal protein L36                                                               |
| 18d00008 | 0.28236 | ni     | hypothetical protein                                                 | um11283   | 0.18051 | ni     | related to YSC84 - protein involved in the organization of the actin cytoskeleton                |
| 12c00095 | 0.28242 | K01885 | glutaryl-tRNA synthetase                                             | um05919   | 0.18062 | K00147 | related to PRQ2 - gamma-glutamyl phosphate reductase                                             |
| 7d00067  | 0.28255 | K14997 | hypothetical protein                                                 | um01360   | 0.18063 | K11739 | probable STR2 - Cystathionine gamma-synthase                                                     |
| 8c00115  | 0.28267 | K14834 | protein involved in the nuclear export of pre-ribosomes              | um06075   | 0.18087 | ni     | related to beta-glucosidase                                                                      |
| 13c00055 | 0.28284 | ni     | phosphatidylinositol transfer protein PDR16 and related proteins     | um03557   | 0.1811  | ni     | related to nitrogen assimilation transcription factor                                            |
| 10d00020 | 0.28294 | K03386 | alkyl hydroperoxide reductase                                        | um11804   | 0.1811  | ni     | related to PAN1 - actin-cytoskeleton assembly protein                                            |
| 9d00304  | 0.28296 | K01409 | predicted metalloprotease with chaperone activity                    | um01660   | 0.18114 | ni     | putative protein                                                                                 |
| 12d00139 | 0.28296 | ni     | hypothetical protein                                                 | um03440   | 0.18151 | ni     | conserved hypothetical Ustilago-specific protein                                                 |
| 7d00328  | 0.28312 | K11600 | exosomal 3'-5' exoribonuclease complex, subunit Rps41                | um02342   | 0.18162 | ni     | hypothetical protein                                                                             |
| 9d00412  | 0.28312 | ni     | 50S ribosomal protein L1                                             | um01709   | 0.18164 | ni     | conserved hypothetical protein                                                                   |
| 10d00123 | 0.28313 | ni     | Fe2+/Zn2+ regulated transporter                                      | um10282   | 0.1819  | ni     | putative protein                                                                                 |
| 26c00084 | 0.28328 | K09650 | integral membrane protease of the rhomboid family                    | um04165   | 0.18196 | ni     | conserved hypothetical protein                                                                   |
| 4c00014  | 0.2833  | K09313 | transcription factor                                                 | um10841   | 0.18201 | K02900 | probable RPL28 - 60S large subunit ribosomal protein L27a                                        |
| 9d00378  | 0.28339 | K07342 | preprotein translocase, gamma subunit                                | um10727   | 0.18205 | K06672 | related to proline-rich protein required for meiotic chromosome condensation and synapsis        |
| 2c00060  | 0.28349 | ni     | hypothetical protein                                                 | um05416   | 0.18209 | K06173 | related to PUS1 - pseudouridine synthase 1                                                       |
| 20d00081 | 0.28371 | K02880 | 60S ribosomal protein L22                                            | um04764   | 0.18221 | ni     | putative protein                                                                                 |
| 9c00193  | 0.28377 | ni     | hypothetical protein                                                 | um11571   | 0.18226 | K08744 | related to GRD1 - cardiolipin synthase                                                           |
| 20d00057 | 0.28396 | K04718 | sphingosine kinase                                                   | um06128   | 0.18227 | ni     | conserved hypothetical Ustilago-specific protein                                                 |
| 22c00047 | 0.28396 | ni     | hypothetical protein                                                 | um01774   | 0.18229 | ni     | conserved hypothetical protein                                                                   |
| 11d00028 | 0.284   | K14786 | KRR1-interacting protein involved in 40S ribosome biogenesis         | um03575   | 0.18237 | ni     | putative protein                                                                                 |
| 14c00087 | 0.284   | ni     | hypothetical protein                                                 | um03406   | 0.18238 | ni     | hypothetical protein                                                                             |
| 10d00084 | 0.28421 | ni     | hypothetical protein                                                 | um11496   | 0.18238 | K15437 | related to Tyrosyl-RNA synthetase                                                                |
| 22c00061 | 0.28431 | ni     | hypothetical protein                                                 | um11882   | 0.1825  | K12733 | probable Peptidyl-prolyl cis-trans isomerase                                                     |
| 22d00189 | 0.28444 | K00059 | mitochondrial/plastidial beta-ketoacyl-ACP reductase                 | um15057   | 0.18266 | K02516 | related to protein arginine N-methyltransferase                                                  |
| 26d00038 | 0.2845  | ni     | uncharacterized conserved protein                                    | um10663   | 0.18275 | ni     | probable RHO1 - GTP-binding protein of the rho subfamily of ras-like proteins                    |
| 26c00085 | 0.28448 | K01569 | hypothetical protein                                                 | um04206   | 0.1829  | ni     | conserved hypothetical protein                                                                   |
| 12d00023 | 0.28465 | ni     | hypothetical protein                                                 | um02400   | 0.18341 | ni     | conserved hypothetical protein                                                                   |
| 11d00007 | 0.28465 | K03246 | translation initiation factor 3, subunit V/TF-beta receptor-interact | um05437   | 0.18363 | ni     | conserved hypothetical protein                                                                   |
| 26c00079 | 0.2847  | ni     | hypothetical protein                                                 | um05633   | 0.18368 | ni     | conserved hypothetical protein                                                                   |
| 2d00025  | 0.28475 | ni     | endoplasmic reticulum membrane-associated oxidoreductin              | um06205   | 0.18399 | ni     | conserved hypothetical Ustilago-specific protein                                                 |
| 10d00028 | 0.28481 | ni     | hypothetical protein                                                 | um06345   | 0.18404 | K01738 | probable cysteine synthase                                                                       |
| 21d00002 | 0.28483 | ni     | serine-threonine protein kinase FUSED                                | um00460   | 0.18414 | K01149 | related to exosome complex exonuclease                                                           |
| 12d00048 | 0.28499 | K00030 | isocitrate dehydrogenase, alpha subunit                              | um12293   | 0.18425 | K00599 | conserved hypothetical protein                                                                   |
| 6d00029  | 0.28508 | ni     | hypothetical protein                                                 | um04770   | 0.18428 | ni     | related to splicing factor SPF30                                                                 |
| 22d00136 | 0.28534 | ni     | flavin-dependent monooxygenase                                       | um02004   | 0.18434 | ni     | conserved hypothetical protein                                                                   |
| 3d00008  | 0.28538 | K10295 | F-box protein FBX9                                                   | um10959   | 0.18456 | ni     | putative protein                                                                                 |
| 27d00013 | 0.28553 | ni     | hypothetical protein                                                 | um05820   | 0.18465 | ni     | hypothetical protein                                                                             |
| 19d00062 | 0.28564 | K15262 | isoamyl acetate-hydrolyzing esterase and related enzymes             | um00152   | 0.18466 | ni     | related to tandem ph domain-containing protein-2                                                 |
| 15d00088 | 0.2857  | ni     | hypothetical protein                                                 | um03530   | 0.18474 | ni     | related to PAN15 - Presequence translocase-Associated Motor                                      |
| 14c00010 | 0.28573 | ni     | hypothetical protein                                                 | um11347.2 | 0.18524 | K05284 | related to GP114 - Glycosylphosphatidylinositol-alpha 1                                          |
| 5d00112  | 0.28604 | ni     | cyclin B and related kinase-activating proteins                      | um11487   | 0.18538 | K14801 | conserved hypothetical protein                                                                   |
| 8c00019  | 0.28614 | ni     | sideroflexin                                                         | um05269   | 0.18543 | K16261 | probable general amino acid permease                                                             |
| 25c00079 | 0.28618 | ni     | hypothetical protein                                                 | um00415   | 0.18573 | K07023 | conserved hypothetical protein                                                                   |
| 19d00117 | 0.2863  | ni     | hypothetical protein                                                 | um00805   | 0.18576 | ni     | putative protein                                                                                 |
| 22c00199 | 0.28643 | ni     | hypothetical protein                                                 | um15031   | 0.18591 | K0     |                                                                                                  |

|          |         |        |                                                                |           |         |        |                                                                             |
|----------|---------|--------|----------------------------------------------------------------|-----------|---------|--------|-----------------------------------------------------------------------------|
| 10d00020 | 0.28949 | K01942 | biotin holocarboxylase synthetase                              | um10044   | 0.19002 | K01254 | related to leukotriene-A4 hydrolase                                         |
| 8d000027 | 0.28973 | ni     | hypothetical protein                                           | um01667   | 0.19003 | ni     | conserved hypothetical protein                                              |
| 16c00013 | 0.29    | K12829 | splicing factor 3b, subunit 2                                  | um10889   | 0.19025 | K15071 | conserved hypothetical protein                                              |
| 9d000385 | 0.29029 | K11126 | telomerase catalytic subunit                                   | um00254   | 0.19036 | ni     | conserved hypothetical protein                                              |
| 22d00056 | 0.29035 | ni     | hypothetical protein                                           | um10979   | 0.19038 | K09680 | related to pantothenate kinase                                              |
| 15d00015 | 0.2905  | K15178 | pafl1/ma polymerase II complex, RTF1 component                 | um10000   | 0.19041 | ni     | conserved hypothetical protein                                              |
| 22d01614 | 0.29063 | K01515 | nucleoside diphosphate-sugar hydrolase of the MutT             | um12172   | 0.19089 | ni     | conserved hypothetical protein                                              |
| 9c000273 | 0.29067 | ni     | hypothetical protein                                           | um11486   | 0.19114 | ni     | putative protein                                                            |
| 7d00066  | 0.29069 | ni     | predicted sugar phosphatase                                    | um10108   | 0.19119 | ni     | conserved hypothetical protein                                              |
| 9c00248  | 0.29101 | ni     | hypothetical protein                                           | um00114   | 0.19143 | K11313 | related to SPT3 - general transcriptional adaptor or co-activator           |
| 5c00127  | 0.29119 | ni     | mitochondrial import inner membrane translocase, subunit TIM22 | um11470   | 0.19156 | ni     | conserved hypothetical protein                                              |
| 26d00222 | 0.29122 | K01868 | thiazolamine synthetase                                        | um03533   | 0.19158 | K04486 | related to HIS2 - histidinyl-phosphatase                                    |
| 8d000090 | 0.29163 | ni     | hypothetical protein                                           | um04488   | 0.1916  | ni     | related to MRP7 - mitochondrial ribosomal protein                           |
| 9d00262  | 0.29166 | ni     | hypothetical protein                                           | um01605   | 0.19167 | K06662 | related to cell cycle checkpoint protein RAD17                              |
| 9d00297  | 0.29173 | K03849 | glucosyltransferase - Alg8p                                    | um11774   | 0.19189 | ni     | conserved hypothetical protein                                              |
| 6d00101  | 0.29187 | ni     | hypothetical protein                                           | um02961   | 0.19198 | K11315 | conserved hypothetical protein                                              |
| 7c00046  | 0.29204 | K12178 | COP3 signalosome, subunit CSN4                                 | um05099   | 0.192   | ni     | putative protein                                                            |
| 6c00134  | 0.29214 | ni     | hypothetical protein                                           | um06376   | 0.19208 | K07953 | probable GTP-binding protein SAR1                                           |
| 25d00012 | 0.29217 | ni     | vesicle coat complex COPI, zeta subunit                        | um01564   | 0.19219 | ni     | related to integral peroxisomal membrane protein                            |
| 3c00059  | 0.29256 | ni     | p21-activated serine/threonine protein kinase                  | um01875   | 0.19239 | K00965 | probable GAL7 - UDP-glucose--hexose-1-phosphate uridylyltransferase         |
| 16c00044 | 0.29264 | K04082 | mitochondrial J-type chaperone                                 | um04948   | 0.19251 | K03676 | probable GRX1 - glutaredoxin                                                |
| 15d00028 | 0.29264 | ni     | hypothetical protein                                           | um10162   | 0.1926  | ni     | related to Transformer-2 protein homolog                                    |
| 20d00045 | 0.29265 | ni     | aldo/keto reductase family proteins                            | um01103   | 0.19269 | K02134 | probable ATP synthase delta chain precursor                                 |
| 15c00077 | 0.29268 | K14951 | cation transport ATPase                                        | um11088   | 0.19279 | ni     | conserved hypothetical protein                                              |
| 25d00090 | 0.29304 | ni     | hypothetical protein                                           | um06417   | 0.19284 | K04564 | related to Superoxide dismutase                                             |
| 5c00054  | 0.29332 | ni     | hypothetical protein                                           | um05032   | 0.19295 | ni     | conserved hypothetical Ustilago-specific protein                            |
| 3c00065  | 0.29374 | ni     | hypothetical protein                                           | um12205   | 0.19302 | ni     | hypothetical protein                                                        |
| 7c00149  | 0.29394 | K06883 | putative transcription factor FET5                             | um01794   | 0.19307 | K01488 | related to adenosine deaminase                                              |
| 9d000314 | 0.29422 | K14303 | nuclear pore complex, Nup160 component                         | um00586   | 0.19307 | ni     | conserved hypothetical protein                                              |
| 25c00030 | 0.29433 | K03267 | polypeptide release factor 3                                   | um11866   | 0.19308 | K12857 | probable U5 snRNP-specific 40 kD protein                                    |
| 22d01005 | 0.29435 | ni     | hypothetical protein                                           | 0.1931    | K09584  | ni     | probable protein disulfide-isomerase precursor                              |
| 16d00011 | 0.29445 | K14819 | dual specificity phosphatase                                   | um03707   | 0.19328 | ni     | putative protein                                                            |
| 18d00031 | 0.29449 | ni     | hypothetical protein                                           | um11843   | 0.19334 | ni     | conserved hypothetical protein                                              |
| 13d00077 | 0.2945  | K15601 | putative transcription factor SqNCA                            | um00356   | 0.19358 | ni     | conserved hypothetical protein                                              |
| 15d00048 | 0.29455 | K05564 | beta subunit of farnesyltransferase                            | um10106   | 0.19367 | K10589 | related to ubiquitin protein ligase e3                                      |
| 2d00049  | 0.29467 | K02973 | 40S ribosomal protein S23                                      | um03820   | 0.19394 | ni     | related to PEP5 - vacuolar biogenesis protein                               |
| 9d00417  | 0.29473 | ni     | hypothetical protein                                           | um10290   | 0.19409 | K00830 | probable AGX1 - alanine-glyoxylate transaminase                             |
| 13c00092 | 0.29475 | ni     | hypothetical protein                                           | um02283   | 0.19421 | ni     | conserved hypothetical protein                                              |
| 2d00068  | 0.29479 | ni     | hypothetical protein                                           | um05906   | 0.19424 | K02355 | probable NEF1 - translation elongation factor G                             |
| 13d00069 | 0.29484 | ni     | hypothetical protein                                           | um05216   | 0.19425 | ni     | related to IKS1 - putative serine                                           |
| 22c0110  | 0.29485 | K02212 | DNA replication licensing factor, MCM4 component               | um03127   | 0.19428 | ni     | conserved hypothetical protein                                              |
| 25c00049 | 0.29485 | ni     | regulator of ATP-sensitive K+ channels Alpha-endosulfine       | um01186   | 0.19436 | ni     | conserved hypothetical protein                                              |
| 9c00106  | 0.29498 | ni     | putative phosphonitrosite phosphatase                          | um10423   | 0.19444 | ni     | conserved hypothetical protein                                              |
| 9c00349  | 0.29503 | K13118 | nucleoside diphosphate kinase                                  | um00743   | 0.19447 | K14774 | related to IES1 - inorganic pyrophosphatase                                 |
| 7d00103  | 0.29513 | K03126 | transcription initiation factor TFIID, subunit TAF12           | um03944   | 0.19464 | ni     | conserved hypothetical protein                                              |
| 12d00130 | 0.29515 | ni     | ABC (ATP binding cassette) 1 protein                           | um11727.2 | 0.19465 | K14863 | related to YTM1 - microtubule-interacting protein                           |
| 8d00068  | 0.29519 | ni     | oxysterol-binding protein                                      | um11969   | 0.19471 | ni     | hypothetical protein                                                        |
| 26d00021 | 0.29546 | ni     | phosphatidylyl phosphatase activator                           | um02516   | 0.19478 | K17428 | conserved hypothetical protein                                              |
| 12d00088 | 0.29557 | K15325 | hypothetical protein                                           | um05868   | 0.19489 | ni     | related to peptide transporter Mdt1                                         |
| 12d00033 | 0.29557 | ni     | hypothetical protein                                           | um04881   | 0.19495 | K00987 | related to mRNA guanylyltransferase                                         |
| 7d00046  | 0.29579 | K15440 | tRNA-specific adenosine deaminase 1                            | um11723   | 0.19499 | K01228 | related to ER glucosidase I                                                 |
| 7d00049  | 0.29586 | ni     | hypothetical protein                                           | um02624   | 0.19508 | ni     | related to diploid state maintenance protein chpA                           |
| 24d00053 | 0.29621 | ni     | kinase domain ES2                                              | um10121   | 0.19512 | ni     | related to DPP1 - diacylglycerol pyrophosphate phosphatase                  |
| 9c00127  | 0.29625 | K03860 | N-acetylglucosaminyltransferase complex, subunit PIG-Q/GPI1    | um05087   | 0.19529 | ni     | putative protein                                                            |
| 27c00029 | 0.29626 | K12175 | COP3 signalosome, subunit CSN1                                 | um01867.2 | 0.19542 | ni     | conserved hypothetical protein                                              |
| 10c00024 | 0.29645 | ni     | mitochondrial Fe2+ transporter MMT1 and related transporters   | um10295   | 0.1955  | ni     | hypothetical protein                                                        |
| 16d00036 | 0.29653 | K07897 | ras-related GTPase                                             | um04356   | 0.19604 | K14772 | conserved hypothetical protein                                              |
| 5c00125  | 0.29656 | ni     | hypothetical protein                                           | um04874   | 0.1962  | ni     | putative protein                                                            |
| 16d00034 | 0.29669 | K14849 | nuclear protein NOPS2/RRP1                                     | um10262   | 0.19627 | ni     | conserved hypothetical protein                                              |
| 27d00061 | 0.29687 | ni     | asparaginyl-tRNA synthetase                                    | um10245   | 0.19638 | ni     | conserved hypothetical protein                                              |
| 3d00081  | 0.29691 | ni     | 40S ribosomal protein S7                                       | um10197   | 0.19641 | K02973 | probable 40S ribosomal protein S23                                          |
| 25d00083 | 0.297   | ni     | hypothetical protein                                           | um03295   | 0.19655 | ni     | conserved hypothetical protein                                              |
| 10c00023 | 0.2971  | ni     | hypothetical protein                                           | um11605   | 0.19686 | K10761 | related to THG1 - protein required for tRNA-His guanylation at 5 prime end  |
| 22c00273 | 0.29725 | ni     | hypothetical protein                                           | um01713   | 0.19692 | ni     | hypothetical protein                                                        |
| 9c00188  | 0.2974  | ni     | hypothetical protein                                           | um10119   | 0.19702 | K08850 | probable IPL1 - ser                                                         |
| 22c00283 | 0.29744 | K13281 | hypothetical protein                                           | um01129.2 | 0.19711 | ni     | conserved hypothetical protein                                              |
| 16d00126 | 0.29748 | ni     | hypothetical protein                                           | um03764   | 0.19712 | ni     | hypothetical protein                                                        |
| 22c00100 | 0.29751 | ni     | hypothetical protein                                           | um05439   | 0.19713 | ni     | related to Chitin-binding protein                                           |
| 2c00058  | 0.2976  | ni     | hypothetical protein                                           | um11536   | 0.19715 | K02932 | probable RPL5 - 60S large subunit ribosomal protein L5                      |
| 7d00115  | 0.2977  | K12626 | small Nuclear ribonucleoprotein splicing factor                | um01748   | 0.19733 | ni     | related to RV3167 - BAR adaptor protein                                     |
| 19d00074 | 0.29776 | ni     | hypothetical protein                                           | 0.19742   | ni      | ni     | related to fruiting body protein SCT precursor                              |
| 27d00084 | 0.29777 | ni     | hypothetical protein                                           | um05965   | 0.19747 | ni     | conserved hypothetical protein                                              |
| 22c00117 | 0.29791 | K12763 | hypothetical protein                                           | um03368   | 0.19752 | ni     | putative protein                                                            |
| 20d00035 | 0.29792 | K01507 | inorganic pyrophosphatase                                      | um04197   | 0.19753 | ni     | related to purine-cytosine permease                                         |
| 9c00223  | 0.2981  | ni     | hypothetical protein                                           | um05307   | 0.19765 | ni     | related to glyoxylate                                                       |
| 7c00238  | 0.2981  | K11761 | hypothetical protein                                           | um11342   | 0.19769 | K13119 | related to rap-5 protein                                                    |
| 26d00008 | 0.29814 | K05824 | isocitrate dehydrogenase, alpha subunit                        | um05489   | 0.19779 | ni     | related to Nuclear pore complex protein Nup214                              |
| 26c00038 | 0.29814 | ni     | hypothetical protein                                           | um03318   | 0.19783 | K00988 | related to APA2 - ATP adenylyltransferase II                                |
| 5d000031 | 0.29817 | ni     | hypothetical protein                                           | um12119   | 0.19786 | ni     | putative protein                                                            |
| 10d00093 | 0.29841 | ni     | amino acid transporters                                        | 0.1979    | K14521  | ni     | conserved hypothetical protein                                              |
| 6d000001 | 0.29845 | ni     | hypothetical protein                                           | um11738   | 0.19798 | K15292 | related to syntaxin binding protein 1                                       |
| 15d00042 | 0.2985  | ni     | amidases                                                       | um12346   | 0.19812 | ni     | conserved hypothetical protein                                              |
| 13c00024 | 0.29858 | ni     | membrane protein                                               | um05044   | 0.19859 | K13099 | conserved hypothetical protein                                              |
| 15c00055 | 0.29861 | ni     | predicted guanine nucleotide exchange factor                   | um12061   | 0.19874 | ni     | putative protein                                                            |
| 9c000078 | 0.2987  | K16261 | amino acid transporters                                        | um10859   | 0.19817 | ni     | related to UV induced protein uvr15                                         |
| 27c00023 | 0.29875 | K05859 | N-acetylglucosaminyltransferase complex, subunit PIG-C/GPI2    | um05287   | 0.19918 | ni     | related to Vacuolar protein sorting-associated protein VP55                 |
| 1c00006  | 0.29876 | ni     | hypothetical protein                                           | um01399   | 0.19948 | ni     | putative protein                                                            |
| 14d00047 | 0.29883 | ni     | dimethylglycine dehydrogenase precursor                        | um03386   | 0.19949 | ni     | conserved hypothetical protein                                              |
| 11c00060 | 0.2992  | K12863 | uncharacterized conserved protein                              | um11567.2 | 0.1995  | ni     | related to histidine triad protein                                          |
| 10d00114 | 0.29924 | ni     | hypothetical protein                                           | um11581   | 0.19953 | ni     | conserved hypothetical protein                                              |
| 7c00328  | 0.29928 | ni     | hypothetical protein                                           | um11357   | 0.19961 | ni     | conserved hypothetical protein                                              |
| 12c00037 | 0.29932 | ni     | transport protein particle TRAPP complex subunit               | um04773   | 0.19968 | ni     | conserved hypothetical protein                                              |
| 22d0108  | 0.29939 | K07904 | GTPase Rab11/YPT3                                              | um11534   | 0.19982 | ni     | putative protein                                                            |
| 24d0010  | 0.29942 | ni     | nucleosome-binding factor SPN, POB3 subunit                    | 0.2       | 0.2     | ni     | conserved hypothetical protein                                              |
| 7d00107  | 0.29968 | K11843 | ubiquitin-specific protease                                    | um01030   | 0.20004 | K15193 | conserved hypothetical protein                                              |
| 14c00136 | 0.2997  | ni     | hypothetical protein                                           | um03445   | 0.20007 | ni     | conserved hypothetical protein                                              |
| 5d00100  | 0.29971 | ni     | nuclear transport factor 2                                     | um06433   | 0.20015 | ni     | K                                                                           |
| 6c00058  | 0.29992 | ni     | hypothetical protein                                           | um03000   | 0.20028 | ni     | conserved hypothetical protein                                              |
| 27c00033 | 0.29983 | K00852 | ribokinase                                                     | um01370.2 | 0.20038 | K03671 | related to Thioresoxin                                                      |
| 9c00236  | 0.29987 | ni     | calcineurin-mediated signaling pathway inhibitor DSCR1         | um00678   | 0.20046 | K14792 | related to RRP5 - processing of pre-ribosomal RNA                           |
| 8c00091  | 0.29989 | ni     | hypothetical protein                                           | um05704   | 0.2006  | ni     | conserved hypothetical protein                                              |
| 9d00060  | 0.29997 | K10599 | mRNA splicing factor                                           | um12332   | 0.20062 | ni     | conserved hypothetical protein                                              |
| 10c00079 | 0.30019 | K03458 | hypothetical protein                                           | um01527   | 0.20067 | ni     | putative protein                                                            |
| 9c00360  | 0.30021 | K15082 | leucine rich repeat proteins                                   | um05443   | 0.20075 | ni     | conserved hypothetical protein                                              |
| 12d00045 | 0.30036 | K00252 | glutaryl-coa dehydrogenase                                     | um04880   | 0.20076 | K08337 | probable APG7 - component of the autophagic system                          |
| 10c00052 | 0.30056 | ni     | hypothetical protein                                           | um03332   | 0.20087 | K09537 | related to cell cycle control protein cwf23                                 |
| 19d00058 | 0.30056 | K00021 | 3-hydroxy-3-methylglutaryl-CoA                                 | um04127   | 0.20092 | ni     | probable ERG26 - C-3 steroid dehydrogenase                                  |
| 5d00056  | 0.30078 | ni     | hypothetical protein                                           | um06461   | 0.20137 | K05658 | related to Leptomycin B resistance protein pmr1                             |
| 7c00356  | 0.30081 | K03066 | 26S proteasome regulatory complex, ATPase RPT6                 | um00601   | 0.20175 | K13093 | related to Splicing factor UZAF-associated protein 2                        |
| 9c00099  | 0.30091 | ni     | hypothetical protein                                           | um10024   | 0.20188 | ni     | conserved hypothetical protein                                              |
| 7c00272  | 0.30097 | K01611 | S-adenosylmethionine decarboxylase                             | um03960   | 0.20195 | ni     | putative protein                                                            |
| 26d00034 | 0.30116 | ni     | hypothetical protein                                           | um04581   | 0.20211 | ni     | putative protein                                                            |
| 7c00266  | 0.3012  | K01648 | ATP-citrate lyase                                              | um10185   | 0.20222 | ni     | related to MDR1 - Mactp interacting protein                                 |
| 27c00007 | 0.30121 | ni     | protein involved in ubiquinone biosynthesis                    | um05142   | 0.20244 | K08342 | related to ATG4 - essential for autophagy                                   |
| 13c00002 | 0.30127 | K12836 | U2 snRNP splicing factor, small subunit, and related proteins  | um04059   | 0.20245 | K03353 | related to anaphase control protein cut9                                    |
| 1c00020  | 0.30133 | K03133 | 5'UTR initiation factor TFIID, subunit TAF9                    | um04320   | 0.20247 | K14803 | related to PTC1 - protein                                                   |
| 7d00054  | 0.30163 | ni     | sorting nexin SNX11                                            | um01621   | 0.20263 | ni     | conserved hypothetical protein                                              |
| 18d00025 | 0.30177 | ni     | hypothetical protein                                           | um11805   | 0.20291 | ni     | conserved hypothetical protein                                              |
| 5c00049  | 0.30185 | ni     | hypothetical protein                                           | um00561.2 | 0.20292 | ni     | related to cell cycle arrest protein BUB2                                   |
| 12c00098 | 0.30185 | K14816 | C2H2-type Zn-finger protein                                    | um01231   | 0.20293 | K00729 | related to dihydrophosphate beta-glucosyltransferase                        |
| 10d0004  | 0.30196 | K17361 | acyl-coa thioesterase                                          | um10433   | 0.20299 | K03014 | probable Pco26 - 19kD subunit of DNA-directed RNA polymerases I             |
| 7d00118  | 0.30209 | K02889 | 60S ribosomal protein L21                                      | um10480   | 0.20304 | ni     | conserved hypothetical protein                                              |
| 3c00022  | 0.30211 | K01476 | arginase                                                       | um00971   | 0.20321 | ni     | conserved hypothetical protein                                              |
| 9c00244  | 0.30234 | ni     | hypothetical protein                                           | um04546   | 0.20322 | ni     | ni                                                                          |
| 9c00323  | 0.30235 | ni     | hypothetical protein                                           | um05999   | 0.20324 | ni     | conserved hypothetical protein                                              |
| 5c00079  | 0.30237 | ni     | ypd/rab-specific GTPase-activating protein GYP7                | um00130   | 0.20327 | K06130 | related to lysophospholipase                                                |
| 4c00034  | 0.30261 | ni     | hypothetical protein                                           | um00376   | 0.20327 | K11872 | related to deubiquitinating enzyme ubh1                                     |
| 18c00012 | 0.30268 | ni     | hypothetical protein                                           | um01718   | 0.20339 | K02564 | probable glucosamine-6-phosphate isomerase                                  |
| 5d00119  | 0.30308 | ni     | hypothetical protein                                           | um01620   | 0.20348 | ni     | hypothetical protein                                                        |
| 24c00050 | 0.30311 | K14806 | ATP-dependent RNA helicase                                     | um04982   | 0.20357 | ni     | hypothetical protein                                                        |
| 9c00032  | 0.3032  | ni     | hypothetical protein                                           | um03619   | 0.20384 | ni     | related to multidrug resistant protein                                      |
| 9c00141  | 0.30353 | K02990 | mitochondrial ribosomal protein MRP17                          | um05201   | 0.20413 | K10882 | conserved hypothetical protein                                              |
| 12c0101  | 0.30361 | K09580 | protein disulfide isomerase                                    | um04470   | 0.20416 | K00700 | probable branching enzyme                                                   |
| 22c00030 | 0.30369 | ni     | hypothetical protein                                           | um01339   | 0.20418 | ni     | conserved hypothetical protein                                              |
| 9c00200  | 0.30373 | ni     | sorbitol dehydrogenase                                         | um00903   | 0.20421 | K11366 | related to UB98 - Ubiquitin-specific protease component of the SAGA complex |
| 15d00085 | 0.3     |        |                                                                |           |         |        |                                                                             |



|          |         |        |                                                                   |           |         |        |                                                                                   |
|----------|---------|--------|-------------------------------------------------------------------|-----------|---------|--------|-----------------------------------------------------------------------------------|
| 7400030  | 0.30562 | K11397 | hypothetical protein                                              | um02944   | 0.20673 | K09531 | conserved hypothetical protein                                                    |
| 12c00008 | 0.30564 | K00599 | guanidinocacetate methyltransferase and related proteins          | um00585   | 0.20687 | K03035 | probable RPN5 - 26S proteasome regulatory subunit                                 |
| 7400070  | 0.30571 | K14832 | CAAT T-binding transcription factor                               | um01689   | 0.20693 | ni     | hypothetical protein                                                              |
| 18c00087 | 0.30585 | K10356 | myosin class I heavy chain                                        | um06382   | 0.20697 | ni     | putative protein                                                                  |
| 14c00077 | 0.30589 | K01652 | thiamine pyrophosphate-requiring enzyme                           | um06338   | 0.20698 | ni     | related to Restin                                                                 |
| 3400004  | 0.30592 | ni     | uncharacterized conserved protein                                 | um01788   | 0.20711 | ni     | related to deacetylase                                                            |
| 10d00118 | 0.30598 | K00784 | predicted metal-dependent hydrolase                               | um11115   | 0.20736 | K10356 | myosin I                                                                          |
| 16c00048 | 0.30603 | ni     | hypothetical protein                                              | um04283   | 0.20736 | ni     | putative protein                                                                  |
| 13c00059 | 0.30611 | ni     | hypothetical protein                                              | um04345   | 0.20743 | K02152 | probable vacuolar atp synthase subunit g                                          |
| 8400022  | 0.30614 | ni     | hypothetical protein                                              | um00273   | 0.20749 | ni     | conserved hypothetical protein                                                    |
| 22c00303 | 0.30631 | ni     | hypothetical protein                                              | um10868   | 0.20773 | ni     | conserved hypothetical protein                                                    |
| 9c00218  | 0.30635 | K16073 | hypothetical protein                                              | um11085   | 0.20776 | ni     | related to UDP-N-acetylglucosaminyltransferase                                    |
| 22c00210 | 0.30637 | ni     | hypothetical protein                                              | um00215   | 0.20779 | K00931 | probable PRC1 - glutamate 5-kinase                                                |
| 9c00220  | 0.30647 | ni     | hypothetical protein                                              | um05326   | 0.20799 | ni     | conserved hypothetical protein                                                    |
| 7400148  | 0.30652 | K00052 | 3-isopropylmalate dehydrogenase                                   | um03865   | 0.20800 | K07901 | probable SEC4-like Rab                                                            |
| 15c00050 | 0.30691 | ni     | uncharacterized conserved protein                                 | um12174   | 0.20813 | ni     | conserved hypothetical protein                                                    |
| 9c00168  | 0.30698 | ni     | hypothetical protein                                              | um03020   | 0.20816 | ni     | ni                                                                                |
| 19c00104 | 0.307   | ni     | hypothetical protein                                              | um03365   | 0.20823 | ni     | putative protein                                                                  |
| 13c00072 | 0.30706 | K06676 | chromosome condensation complex Condensin, subunit H              | um05371   | 0.20833 | ni     | conserved hypothetical protein                                                    |
| 11c00015 | 0.30711 | ni     | hypothetical protein                                              | um05645   | 0.20833 | K08493 | related to VTI1 - v-SNARE                                                         |
| 6400074  | 0.30718 | ni     | hypothetical protein                                              | um02549   | 0.20848 | ni     | conserved hypothetical protein                                                    |
| 10d00015 | 0.30718 | K00237 | succinate dehydrogenase membrane anchor subunit and related       | um05660   | 0.20851 | ni     | conserved hypothetical protein                                                    |
| 10c00001 | 0.30724 | ni     | hypothetical protein                                              | um03814.2 | 0.20867 | ni     | conserved hypothetical protein                                                    |
| 6400113  | 0.30744 | ni     | DEAH-box RNA helicase                                             | um05901   | 0.20877 | K08496 | conserved hypothetical protein                                                    |
| 14d00118 | 0.30746 | K04079 | molecular chaperone                                               | um03892   | 0.20881 | K14810 | probable ATP dependent RNA helicase of the DEAD-box family                        |
| 20c00002 | 0.30763 | K01714 | copper chaperone                                                  | um05004   | 0.20895 | ni     | putative protein                                                                  |
| 20c00015 | 0.30777 | K14538 | GTPase                                                            | um10854   | 0.20892 | ni     | conserved hypothetical protein                                                    |
| 6c00012  | 0.30786 | ni     | hypothetical protein                                              | um02615   | 0.20894 | ni     | hypothetical protein                                                              |
| 25d00040 | 0.30788 | K11984 | U4/U5 snRNP associated protein                                    | um03122   | 0.20922 | ni     | related to beta-1                                                                 |
| 12d00094 | 0.30802 | ni     | hypothetical protein                                              | um11747.2 | 0.20934 | ni     | conserved hypothetical protein                                                    |
| 18c00064 | 0.30802 | K07213 | copper chaperone                                                  | um11878   | 0.20943 | ni     | conserved hypothetical protein                                                    |
| 22d00262 | 0.30811 | ni     | hypothetical protein                                              | um02088   | 0.20951 | K00939 | probable ADK1 - adenylate kinase                                                  |
| 7c00329  | 0.30815 | K14998 | mitochondrial protein Surfeit 1/SURF1/SHY1                        | um12315   | 0.20955 | ni     | hypothetical protein                                                              |
| 22d01067 | 0.30818 | K09660 | predicted endoplasmic reticulum membrane protein Lec35/MPDL       | um03919   | 0.20973 | ni     | related to FIS1 - protein involved in mitochondrial division                      |
| 26d00064 | 0.3083  | K03498 | retinol dehydrogenase                                             | um01323   | 0.20978 | K12870 | related to pre-mRNA splicing factor                                               |
| 15d00093 | 0.30833 | K00665 | animal-type fatty acid synthase and related proteins              | um02385   | 0.20994 | K01626 | probable phospho-2-dehydro-3-deoxyheptanoate aldolase                             |
| 15c00048 | 0.30849 | ni     | hypothetical protein                                              | um11310   | 0.21011 | ni     | conserved hypothetical protein                                                    |
| 10d00001 | 0.30853 | K03006 | RNA polymerase II, large subunit                                  | um11348.2 | 0.21023 | ni     | conserved hypothetical protein                                                    |
| 19d00153 | 0.30862 | ni     | vacuolar sorting protein VPS45                                    | um11780   | 0.21028 | K03238 | probable SUI3 - translation initiation factor eIF2 beta subunit                   |
| 9c000380 | 0.30878 | ni     | hypothetical protein                                              | um05571   | 0.21048 | ni     | related to alpha                                                                  |
| 9c00146  | 0.30879 | ni     | hypothetical protein                                              | um05102   | 0.2106  | ni     | conserved hypothetical protein                                                    |
| 25d00007 | 0.30889 | ni     | FOG, RRM domain                                                   | um04673   | 0.21089 | ni     | related to RecQ family helicase RecQL1                                            |
| 19c00227 | 0.30901 | K00794 | 6,7-dimethyl-8-ribitylmazine synthase                             | um02253   | 0.21089 | K14997 | related to amino acid vacuolar transport protein AVT2                             |
| 11d00018 | 0.30921 | ni     | myosin class I containing SCP domain                              | um01321   | 0.21092 | ni     | probable VIDX2 - involved in vacuole import and degradation                       |
| 24c00020 | 0.30905 | K00228 | dolichyl-phosphate-mannose, protein O-mannosyl transferase        | um00975   | 0.21101 | K02140 | related to ATP20 - subunit G of mitochondrial F1F0-ATP Synthase                   |
| 7400031  | 0.30918 | ni     | hypothetical protein                                              | um11378   | 0.21135 | K01725 | probable Cyanate hydratase                                                        |
| 11d00076 | 0.30922 | K11359 | histone acetyltransferase SAGA/ADA, catalytic subunit PCAF/GC     | um00835.2 | 0.21142 | ni     | putative protein                                                                  |
| 9c00051  | 0.30927 | K03637 | myosin class I containing SCP domain                              | um02243   | 0.21148 | ni     | hypothetical protein                                                              |
| 4c00017  | 0.30951 | ni     | hypothetical protein                                              | um05397   | 0.21157 | ni     | putative protein                                                                  |
| 20d00007 | 0.30954 | ni     | predicted membrane protein                                        | um12232   | 0.21167 | K01875 | related to mitochondrial seryl-tRNA synthetases                                   |
| 11d00070 | 0.30956 | ni     | predicted membrane protein                                        | um02629   | 0.21188 | ni     | related to YRC2 - putative plasma membrane protein                                |
| 22c00140 | 0.30959 | ni     | hypothetical protein                                              | um12281   | 0.21193 | ni     | putative protein                                                                  |
| 9d000348 | 0.30965 | K12847 | spinless sole body protein - Sad1p                                | um00478   | 0.21212 | ni     | related to DSM12 - COP9 signalosome                                               |
| 7c00226  | 0.30967 | K13524 | 4-aminobutyrate aminotransferase                                  | um01363   | 0.21229 | K03004 | related to Rps43 - 43 kD subunit of DNA-directed RNA polymerase I                 |
| 9c00234  | 0.30968 | ni     | hypothetical protein                                              | um00074   | 0.21249 | K14839 | conserved hypothetical protein                                                    |
| 19d00078 | 0.30992 | ni     | predicted methyltransferase                                       | um03918   | 0.21251 | ni     | conserved hypothetical protein                                                    |
| 20c00001 | 0.31009 | ni     | hypothetical protein                                              | um12202   | 0.21261 | ni     | putative protein                                                                  |
| 9c000190 | 0.31019 | K08851 | serine/threonine protein kinase                                   | um02703   | 0.21265 | ni     | hypothetical protein                                                              |
| 9c00267  | 0.31043 | ni     | hypothetical protein                                              | um06066   | 0.21278 | ni     | conserved hypothetical protein                                                    |
| 25d00025 | 0.31055 | ni     | uncharacterized conserved protein                                 | um05916   | 0.21296 | K01598 | related to Phosphopantothencysteine decarboxylase                                 |
| 19d00093 | 0.3106  | ni     | hypothetical protein                                              | um10126   | 0.21314 | ni     | related to SFT2                                                                   |
| 25c00063 | 0.31073 | ni     | hypothetical protein                                              | 0.21313   | K14018  | ni     | related to DDX1 - involved in ubiquitin-dependent proteolysis                     |
| 28d00102 | 0.31073 | ni     | predicted transporter                                             | um10065   | 0.21332 | ni     | related to ACN9 - protein of gluconeogenesis in mitochondrial intermembrane space |
| 9d00413  | 0.31086 | ni     | NADH-dehydrogenase                                                | um10765   | 0.21353 | K03469 | related to Ribonuclease H                                                         |
| 16c00083 | 0.31156 | ni     | hypothetical protein                                              | um01305   | 0.21355 | K11883 | conserved hypothetical protein                                                    |
| 7c00080  | 0.31159 | ni     | hypothetical protein                                              | um01084   | 0.21359 | ni     | conserved hypothetical protein                                                    |
| 28d00050 | 0.31176 | ni     | hypothetical protein                                              | um03070   | 0.21381 | K01115 | probable SPC14 - phospholipase D                                                  |
| 7400281  | 0.31178 | K03872 | RNA polymerase II transcription elongation factor Elnon1/Sill, su | um04198   | 0.21367 | K12669 | related to OST1 - oligosaccharyltransferase gamma subunit                         |
| 7c00014  | 0.31195 | ni     | hypothetical protein                                              | um03100   | 0.21378 | ni     | related to Dynein light chain 2B                                                  |
| 7c00122  | 0.312   | K03242 | translation initiation factor 2, gamma subunit                    | um10865   | 0.21411 | ni     | conserved hypothetical protein                                                    |
| 2c00022  | 0.31205 | K04640 | G-protein alpha subunit                                           | um01908   | 0.21412 | ni     | related to cathepsin d                                                            |
| 7c00135  | 0.31212 | ni     | B-cell receptor-associated protein and related proteins           | um03010   | 0.21419 | ni     | conserved hypothetical protein                                                    |
| 4c00018  | 0.31221 | ni     | hypothetical protein                                              | um00029   | 0.21421 | ni     | probable myo-inositol oxygenase                                                   |
| 9d00052  | 0.31235 | ni     | predicted coiled-coil protein                                     | um11332   | 0.21434 | ni     | putative protein                                                                  |
| 27d00033 | 0.31243 | K15564 | CDK9 kinase-activating protein cyclin T                           | um04027   | 0.21444 | ni     | hypothetical protein                                                              |
| 22c00241 | 0.31245 | K02943 | 60S acidic ribosomal protein P2                                   | um04753   | 0.21449 | ni     | conserved hypothetical protein                                                    |
| 22c00185 | 0.31245 | K06929 | hypothetical protein                                              | um03953   | 0.21462 | ni     | conserved hypothetical protein                                                    |
| 18c00085 | 0.31263 | ni     | excyst complex subunit                                            | um03975   | 0.21462 | ni     | related to Carboxypeptidase Y precursor                                           |
| 9d00009  | 0.31268 | ni     | hypothetical protein                                              | um01890   | 0.21464 | ni     | hypothetical protein                                                              |
| 9d00068  | 0.31276 | ni     | hypothetical protein                                              | um03039   | 0.21471 | K00670 | related to terminal acetyltransferase 1                                           |
| 7400025  | 0.31281 | ni     | hypothetical protein                                              | um03640   | 0.21474 | ni     | conserved hypothetical protein                                                    |
| 11d00060 | 0.31317 | K10251 | 17 beta-hydroxysteroid dehydrogenase type 3                       | um06387   | 0.21487 | K03133 | related to TAF9 - TFIID and SAGA subunit                                          |
| 13c00089 | 0.31325 | K06176 | uncharacterized conserved protein                                 | um02354   | 0.21513 | ni     | putative protein                                                                  |
| 9c00245  | 0.31351 | ni     | hypothetical protein                                              | um11364   | 0.21521 | K01443 | conserved hypothetical protein                                                    |
| 20d00029 | 0.31358 | K01593 | aromatic L-amino-acid-L-histidine decarboxylase                   | um01021   | 0.21522 | ni     | putative protein                                                                  |
| 25d00016 | 0.31383 | K14788 | WD40 repeat protein                                               | um10644   | 0.21524 | K16938 | probable CDC10 - septin                                                           |
| 14d00095 | 0.31386 | K12590 | exosomal 3'-5' exoribonuclease complex, subunit Rtp46             | um03297   | 0.21525 | ni     | hypothetical protein                                                              |
| 5c00112  | 0.31398 | ni     | asparlyl protease                                                 | um01239   | 0.2157  | ni     | conserved hypothetical Ustilago-specific protein                                  |
| 3c00074  | 0.31403 | K01653 | aceticacid synthase, small subunit                                | um04243   | 0.21582 | ni     | conserved hypothetical protein                                                    |
| 28c00052 | 0.31404 | K14301 | nuclear pore complex, rNup107 component                           | um06270   | 0.21589 | ni     | conserved hypothetical protein                                                    |
| 11c00043 | 0.31421 | ni     | hypothetical protein                                              | um10163   | 0.21589 | K02882 | probable 60S large subunit ribosomal protein L20                                  |
| 11c00067 | 0.31444 | ni     | hypothetical protein                                              | um02070   | 0.21604 | ni     | conserved hypothetical protein                                                    |
| 7c00130  | 0.31446 | K10751 | chromatin assembly complex 1 subunit B/CAC2                       | um01837   | 0.21613 | ni     | conserved hypothetical protein                                                    |
| 9c001008 | 0.31481 | ni     | rho GTPase-activating protein                                     | um06384   | 0.21632 | K02884 | related to SUS1 ribosomal protein L19                                             |
| 12c00105 | 0.31467 | K11236 | invasion-inducing protein TIAM1/CDC24                             | um02193   | 0.21636 | ni     | hypothetical protein                                                              |
| 11d00040 | 0.31486 | ni     | 3-Methylcrotonyl-CoA carboxylase, non-biotin containing subunit   | um04147   | 0.21638 | ni     | related to EXO84 - exocyst protein essential for secretion                        |
| 22c00074 | 0.31492 | ni     | hypothetical protein                                              | um03812   | 0.21639 | K12041 | probable NHX1 - Na                                                                |
| 11c00049 | 0.31557 | ni     | FOG, RRM domain                                                   | um02190   | 0.21642 | ni     | conserved hypothetical protein                                                    |
| 13d00079 | 0.31515 | ni     | mod5 protein sorting/negative effector of RNA Pol III synthesis   | um06112   | 0.21642 | ni     | hypothetical protein                                                              |
| 12d00102 | 0.3153  | K03029 | 26S proteasome regulatory complex, subunit RPN10/PSMD4            | um11704.2 | 0.21645 | K08339 | conserved hypothetical protein                                                    |
| 22c00076 | 0.31544 | K12666 | oligosaccharyltransferase, alpha subunit                          | um10129   | 0.21657 | K03242 | probable translation initiation factor eIF2 gamma chain                           |
| 9d000215 | 0.31551 | ni     | hypothetical protein                                              | um15003   | 0.21667 | K03138 | related to TFG1 - TFIIF subunit                                                   |
| 48c00001 | 0.31564 | ni     | ni                                                                | um04315   | 0.21687 | ni     | hypothetical protein                                                              |
| 13d00053 | 0.31562 | K08793 | ribosomal protein S6 kinase and related proteins                  | um03044   | 0.21672 | ni     | conserved hypothetical protein                                                    |
| 27d00069 | 0.31565 | K08991 | endonuclease MUS81                                                | um04415   | 0.21673 | ni     | conserved hypothetical protein                                                    |
| 26c00046 | 0.31566 | K01897 | long chain fatty acid acyl-CoA ligase                             | um00068   | 0.21689 | ni     | conserved hypothetical protein                                                    |
| 4d00025  | 0.31572 | ni     | hypothetical protein                                              | um01524   | 0.217   | ni     | putative protein                                                                  |
| 20d00056 | 0.31576 | K10882 | hypothetical protein                                              | um00192   | 0.21702 | ni     | putative protein                                                                  |
| 22d00149 | 0.31577 | ni     | hypothetical protein                                              | um10491   | 0.21709 | ni     | putative protein                                                                  |
| 22d00195 | 0.31577 | K12946 | hypothetical protein                                              | um04367   | 0.2172  | ni     | hypothetical protein                                                              |
| 27d00026 | 0.31581 | ni     | rhodanese-related sulfurtransferase                               | um11545   | 0.21725 | K11667 | conserved hypothetical protein                                                    |
| 19d00148 | 0.31586 | ni     | hypothetical protein                                              | um03514   | 0.21728 | ni     | putative protein                                                                  |
| 7c00297  | 0.31596 | K08956 | AAA-type ATPase containing the peptidase M41 domain               | um01208   | 0.21731 | K10573 | probable RAD6 - E2 ubiquitin-conjugating enzyme                                   |
| 25d00001 | 0.31608 | ni     | hypothetical protein                                              | um05035   | 0.21747 | K16261 | probable AGP3 - Protein of the amino-acid permease family                         |
| 22c00311 | 0.31613 | ni     | hypothetical protein                                              | um02225   | 0.21747 | ni     | conserved hypothetical protein                                                    |
| 5c00045  | 0.31619 | ni     | hypothetical protein                                              | um03041   | 0.21764 | ni     | putative protein                                                                  |
| 7400014  | 0.3162  | ni     | hypothetical protein                                              | um02356   | 0.21777 | ni     | related to beta-galactosidase precursor                                           |
| 14d0008  | 0.3163  | K07953 | vesicle coat complex COPII, GTPase subunit SAR1                   | um11455   | 0.21795 | ni     | hypothetical protein                                                              |
| 15c00095 | 0.31655 | ni     | phospholipase                                                     | um04531   | 0.21796 | ni     | conserved hypothetical protein                                                    |
| 26c00013 | 0.31655 | K12389 | predicted small molecule transporter                              | um11639   | 0.21819 | ni     | hypothetical protein                                                              |
| 19d00122 | 0.31657 | ni     | hypothetical protein                                              | um06317   | 0.21822 | ni     | related to NP52 - phosphatidylinositol phosphate phosphatase                      |
| 7c00357  | 0.31658 | ni     | FOG, PPR repeat                                                   | um03049   | 0.21841 | ni     | related to neutral amino acid permease                                            |
| 12c00034 | 0.31669 | ni     | hypothetical protein                                              | um10525   | 0.21852 | ni     | hypothetical protein                                                              |
| 22c00037 | 0.31675 | ni     | PHD Zn-finger protein                                             | um03079   | 0.21854 | K03130 | related to TAF5 - TFIID and SAGA subunit                                          |
| 14c00047 | 0.31678 | K15363 | uncharacterized conserved protein                                 | um05171   | 0.21864 | K13941 | related to multifunctional folic acid synthesis protein                           |
| 25c00011 | 0.31693 | ni     | hypothetical protein                                              | um05674   | 0.21868 | K01173 | probable NUC1 - dna                                                               |
| 14c00076 | 0.31699 | ni     | hypothetical protein                                              | um05921   | 0.21875 | K05544 | related to DUS3 - member of dihydrouridine synthase family                        |
| 10c00101 | 0.31701 | ni     | vacuolar sorting protein VPS1                                     | um00204   | 0.21876 | K01537 | related to Ca2 -transporting ATPase                                               |
| 12c00056 | 0.31732 | K02214 | serine/threonine protein kinase of the CDC7 subfamily             | um02259   | 0.21891 | ni     | conserved hypothetical protein                                                    |
| 24d00132 | 0.31755 | ni     | hypothetical protein                                              | um12982   | 0.21927 | K14263 | related to Serine protease                                                        |
| 15d00073 | 0.31771 | ni     | heat shock transcription factor                                   | um02663   | 0.21939 | ni     | conserved hypothetical protein                                                    |
| 9d00147  | 0.31786 | ni     | hypothetical protein                                              | um11666   | 0.21969 | K11599 | related to UMP1 - proteasome maturation factor                                    |
| 12d00091 | 0.31801 | ni     | hypothetical protein                                              | um04291   | 0.22005 | K14552 | conserved hypothetical protein                                                    |
| 18c00092 | 0.31822 | ni     | cystine desulfurase NES1                                          | um06382   | 0.22017 | ni     | putative protein                                                                  |
| 25d00033 | 0.31833 | K08286 | putative serine/threonine protein kinase                          | um01852   | 0.22031 | ni     | related to Epoxide hydrolase 1                                                    |
| 13d00033 |         |        |                                                                   |           |         |        |                                                                                   |

|          |          |        |                                                                                            |           |         |        |                                                                                                   |
|----------|----------|--------|--------------------------------------------------------------------------------------------|-----------|---------|--------|---------------------------------------------------------------------------------------------------|
| 5400136  | 0.32075  | ni     | type I phosphodiesterase                                                                   | um00379   | 0.22278 | K03250 | related to eIF3e - eukaryotic initiation factor 3 subunit E                                       |
| 1600008  | 0.32099  | ni     | hypothetical protein                                                                       | um01569   | 0.2228  | ni     | related to BRE4 - protein involved in endocytosis                                                 |
| 9400396  | 0.32104  | ni     | hypothetical protein                                                                       | um01993   | 0.22287 | ni     | conserved hypothetical protein                                                                    |
| 6400366  | 0.32105  | ni     | protein tyrosine kinase 9                                                                  | um11739   | 0.22289 | K00940 | related to Nucleoside diphosphate kinase 6                                                        |
| 2400004  | 0.32119  | ni     | NADH-dehydrogenase                                                                         | um11365   | 0.22298 | ni     | conserved hypothetical protein                                                                    |
| 2640066  | 0.32119  | K10598 | cyclophilin type                                                                           | um12335   | 0.22307 | K16738 | related to nuclear distribution protein RO11                                                      |
| 19c00055 | 0.32119  | K02923 | 60S ribosomal protein L38                                                                  | um10034   | 0.22323 | ni     | conserved hypothetical protein                                                                    |
| 12c00118 | 0.32121  | K01175 | 3'-5' poly(A) polymerase                                                                   | um00721   | 0.22334 | ni     | related to RPS1 - Regulator of the DEAH family of helicases                                       |
| 5000006  | 0.32128  | K10610 | damage-specific DNA binding complex, subunit DDB1                                          | um00911   | 0.22337 | K14635 | related to MPH1 - Member of the DEAH family of helicases                                          |
| 12c00089 | 0.32154  | K05754 | actin-related protein Arp2/3 complex, subunit ARPC5                                        | um10160   | 0.2238  | ni     | related to Mig1 protein                                                                           |
| 6c00114  | 0.32156  | K15053 | protein involved in glucose derepression and pre-vacuolar endocytosis                      | um12216   | 0.22398 | ni     | related to Mig1 protein                                                                           |
| 14c00439 | 0.32163  | ni     | hypothetical protein                                                                       | um11228   | 0.22402 | K08658 | related to CAAX prenyl protease 2                                                                 |
| 19d00141 | 0.32183  | ni     | hypothetical protein                                                                       | um03141   | 0.22415 | K10746 | related to EXO1 - exonuclease which interacts with Msh2p                                          |
| 19c00101 | 0.32196  | ni     | hypothetical protein                                                                       | um05998   | 0.22427 | K02893 | probable RPL25 - ribosomal protein L23a                                                           |
| 5400097  | 0.32196  | ni     | hypothetical protein                                                                       | um11625   | 0.2243  | K02918 | probable ribosomal protein L35                                                                    |
| 14c00023 | 0.32203  | ni     | hypothetical protein                                                                       | um06858   | 0.22451 | ni     | related to FIG4 - polyphosphoinositide phosphatase family member                                  |
| 16c00010 | 0.32205  | ni     | synaptic vesicle transporter SVOP and related transporters                                 | um03944   | 0.22495 | K14859 | related to SSP1 - Nucleolar protein involved in the assembly of the large ribosomal subunit       |
| 9400322  | 0.32205  | ni     | hypothetical protein                                                                       | um11620   | 0.22497 | K07573 | related to CSL4 - exosome core component                                                          |
| 5400007  | 0.32206  | K00826 | branched chain aminotransferase BCAT1                                                      | um11035   | 0.22504 | K12862 | putative protein                                                                                  |
| 13d00019 | 0.32207  | ni     | hypothetical protein                                                                       | um01874   | 0.22519 | ni     | conserved hypothetical protein                                                                    |
| 7400267  | 0.32237  | K11566 | hypothetical protein                                                                       | um02350   | 0.22519 | K09498 | probable CCT6 - component of chaperonin-containing T-complex                                      |
| 9c00078  | 0.32245  | ni     | glyoxylate oxidase                                                                         | um00277   | 0.22524 | ni     | related to M-phase inducer phosphatase                                                            |
| 2c000074 | 0.32246  | ni     | hypothetical protein                                                                       | um01026   | 0.22535 | ni     | conserved hypothetical protein                                                                    |
| 9c00297  | 0.32273  | ni     | hypothetical protein                                                                       | um03493   | 0.22536 | K03687 | related to MGE1 - heat shock protein - chaperone                                                  |
| 14c00037 | 0.32281  | K01934 | 5-formyltetrahydrofolate cyclo-ligase                                                      | um06299   | 0.22555 | ni     | hypothetical protein                                                                              |
| 9c00037  | 0.32283  | K03786 | hypothetical protein                                                                       | um11566   | 0.22556 | ni     | conserved hypothetical protein                                                                    |
| 22d00285 | 0.32284  | ni     | synaptic vesicle transporter SVOP and related transporters                                 | um03991   | 0.2258  | ni     | putative protein                                                                                  |
| 26c00048 | 0.32286  | ni     | glutathione S-transferase                                                                  | um01857   | 0.22583 | K15078 | conserved hypothetical protein                                                                    |
| 7400026  | 0.32294  | ni     | serine O-acetyltransferase                                                                 | um15019   | 0.22596 | ni     | related to KEL1 - involved in cell fusion and morphology                                          |
| 15d00065 | 0.3231   | K10638 | hypothetical protein                                                                       | um11642   | 0.22606 | K14553 | conserved hypothetical protein                                                                    |
| 10d00090 | 0.32355  | ni     | hypothetical protein                                                                       | um00330   | 0.22607 | ni     | related to Protease                                                                               |
| 25c00024 | 0.32381  | ni     | reductases with broad range of substrate specificities                                     | um05769   | 0.22623 | K12666 | related to Dolichyl-diphosphooligosaccharide-protein glycosyltransferase 67 kDa subunit precursor |
| 14c00031 | 0.32386  | K15920 | hypothetical protein                                                                       | um12334   | 0.22629 | ni     | conserved hypothetical protein                                                                    |
| 16c00068 | 0.32389  | ni     | sexual differentiation process protein ISP4                                                | um15009   | 0.22635 | K07189 | conserved hypothetical protein                                                                    |
| 9c00125  | 0.3241   | ni     | hypothetical protein                                                                       | um11199   | 0.22643 | ni     | putative protein                                                                                  |
| 7c00097  | 0.32401  | K04459 | dual specificity phosphatase                                                               | um03917   | 0.22644 | ni     | ni                                                                                                |
| 3d00013  | 0.32416  | K11293 | histone transcription regulator HIRA                                                       | um01908   | 0.22653 | ni     | related to CCAAT-binding transcription factor subunit aab-1                                       |
| 20c00025 | 0.32431  | K03115 | casein kinase II, beta subunit                                                             | um01455   | 0.22707 | ni     | hypothetical protein                                                                              |
| 2c00077  | 0.32435  | ni     | ATPase related to the helicase subunit of the Holliday junction recombination endonuclease | um00781   | 0.2272  | ni     | putative protein                                                                                  |
| 11d00047 | 11d00047 | K0586  | dichthine synthase                                                                         | um02597   | 0.22722 | ni     | related to Rhizopuspepsin precursor                                                               |
| 5d00141  | 0.3244   | ni     | hypothetical protein                                                                       | um10210.2 | 0.22733 | ni     | conserved hypothetical protein                                                                    |
| 22d00201 | 0.32492  | ni     | hypothetical protein                                                                       | um10532   | 0.22745 | ni     | related to polyketide synthase required for biosynthesis of fumonisin mycotoxins                  |
| 24c00019 | 0.32497  | ni     | hypothetical protein                                                                       | um10439   | 0.22747 | ni     | related to FRR3 - Ferric reductase                                                                |
| 9c00029  | 0.32503  | K08850 | hypothetical protein                                                                       | um11081   | 0.22751 | ni     | putative protein                                                                                  |
| 22d00177 | 0.32504  | K00100 | voltage-gated shaker-like K+ channel, subunit beta1KCNAB                                   | um05117   | 0.22786 | ni     | putative protein                                                                                  |
| 19c00041 | 0.32506  | ni     | ribonuclease III domain proteins                                                           | um05610   | 0.22798 | K00135 | probable LGA2 - succinate semialdehyde dehydrogenase                                              |
| 25c00048 | 0.32518  | ni     | cytochrome P450 CYP3/CYP5/CYP9 subfamilies                                                 | um02724   | 0.22805 | ni     | conserved hypothetical protein                                                                    |
| 10c00091 | 0.32544  | K07478 | ATPase related to the helicase subunit of the Holliday junction recombination endonuclease | um10375   | 0.22822 | ni     | related to HR231 - Poly                                                                           |
| 22d00083 | 0.32558  | ni     | hypothetical protein                                                                       | um03518   | 0.22823 | ni     | related to pyrimidine 5-nucleotidase                                                              |
| 16d00080 | 0.32559  | ni     | aldehyde dehydrogenase                                                                     | um15037   | 0.22828 | ni     | conserved hypothetical protein                                                                    |
| 22c00093 | 0.32578  | ni     | hypothetical protein                                                                       | um05525   | 0.22831 | ni     | related to MRPL16 - mitochondrial ribosomal protein                                               |
| 5d00081  | 0.3258   | K12859 | component of the U4/U6.U5 snRNP                                                            | um10109   | 0.22844 | ni     | conserved hypothetical protein                                                                    |
| 7c00128  | 0.32585  | ni     | membrane coat complex Ratromer, subunit VPS35                                              | um00154   | 0.22851 | ni     | related to Para-nitrobenzyl esterase                                                              |
| 14c00110 | 0.32605  | ni     | cyclin L                                                                                   | um12033   | 0.22889 | ni     | HMG-box transcription factor                                                                      |
| 22d00295 | 0.32605  | ni     | phosphoinositide phosphatase SAC1                                                          | um04054   | 0.22894 | ni     | probable NBP35 - nucleotide-binding protein                                                       |
| 22c00086 | 0.32613  | ni     | hypothetical protein                                                                       | um02113   | 0.22904 | ni     | hypothetical protein                                                                              |
| 20c00004 | 0.32618  | K10771 | apurinic/apyrimidinic endonuclease                                                         | um11371   | 0.22913 | ni     | putative protein                                                                                  |
| 22c00256 | 0.32621  | ni     | cytochrome P450 CYP19A1, alpha subunit                                                     | um12282   | 0.2292  | ni     | probable PHO8 - involved in phosphate transport                                                   |
| 2d00074  | 0.32644  | ni     | hypothetical protein                                                                       | um02237   | 0.22927 | ni     | conserved hypothetical protein                                                                    |
| 7c00205  | 0.32649  | ni     | DNA helicase                                                                               | um02041   | 0.22927 | ni     | putative protein                                                                                  |
| 3c00025  | 0.3265   | K07441 | predicted glycosyltransferase                                                              | um11910   | 0.22947 | ni     | hypothetical protein                                                                              |
| 10d00110 | 0.32723  | ni     | hypothetical protein                                                                       | um10760   | 0.22962 | ni     | conserved hypothetical protein                                                                    |
| 2c00079  | 0.32728  | K01872 | alanyl-tRNA synthetase                                                                     | um04265   | 0.22984 | K08334 | related to Beclin 1                                                                               |
| 5c00106  | 0.32732  | K11137 | hypothetical protein                                                                       | um05262   | 0.22988 | K11763 | conserved hypothetical protein                                                                    |
| 8d00036  | 0.32735  | ni     | hypothetical protein                                                                       | um06807   | 0.2299  | K02603 | related to origin recognition protein Orc1p                                                       |
| 25c00031 | 0.32736  | K12462 | rho GDP-dissociation inhibitor                                                             | um11592   | 0.23013 | ni     | conserved hypothetical protein                                                                    |
| 8d00051  | 0.32743  | K01046 | hypothetical protein                                                                       | um12207   | 0.23017 | ni     | putative protein                                                                                  |
| 8d00099  | 0.32747  | ni     | triglyceride lipase-cholesterol esterase                                                   | um03019.2 | 0.23033 | ni     | conserved hypothetical protein                                                                    |
| 5c00164  | 0.32758  | K00128 | aldehyde dehydrogenase                                                                     | um10941   | 0.23057 | ni     | conserved hypothetical protein                                                                    |
| 9d00167  | 0.32783  | ni     | beta-tubulin folding cofactor D                                                            | um01613   | 0.23074 | ni     | related to AUR1 - inositol phosphotylceramide synthase                                            |
| 9c00039  | 0.32789  | ni     | hypothetical protein                                                                       | um01618   | 0.23081 | ni     | related to CDC50 - cell division protein                                                          |
| 26d00082 | 0.32789  | ni     | hypothetical protein                                                                       | um10827   | 0.23094 | K14797 | related to ENP1 - required for pre-rRNA processing and 40S ribosomal subunit synthesis            |
| 7c00085  | 0.32791  | K12855 | HAT repeat protein                                                                         | um10333   | 0.23104 | ni     | conserved hypothetical protein                                                                    |
| 11d00029 | 0.32794  | ni     | hypothetical protein                                                                       | um12197   | 0.23132 | ni     | putative protein                                                                                  |
| 7c00062  | 0.32841  | ni     | MEKs and related serine/threonine protein kinases                                          | 0.23143   | K10901  | ni     | related to SGS1 - DNA helicase                                                                    |
| 9c00083  | 0.32841  | ni     | RAV1 (regulator of V-ATPase assembly) complex subunit RAV1                                 | um11000   | 0.23143 | ni     | conserved hypothetical protein                                                                    |
| 9c00008  | 0.32843  | ni     | hypothetical protein                                                                       | um10862   | 0.2315  | K10578 | probable UBC6 - E2 ubiquitin-conjugating enzyme                                                   |
| 24d00004 | 0.32845  | ni     | hypothetical protein                                                                       | um11680   | 0.2315  | ni     | conserved hypothetical protein                                                                    |
| 3d00099  | 0.32855  | K02209 | DNA replication licensing factor, MCM5 component                                           | um15078   | 0.23154 | ni     | conserved hypothetical protein                                                                    |
| 5c00048  | 0.32855  | ni     | hypothetical protein                                                                       | um02137   | 0.23157 | ni     | related to positive C/2H2 transcriptional regulator                                               |
| 7400335  | 0.32873  | K05542 | RNA-dihydrouridine synthase                                                                | um00628   | 0.23213 | ni     | putative protein                                                                                  |
| 10d00082 | 0.32905  | K15117 | mitochondrial oxaloacetate carrier protein                                                 | um10069   | 0.23222 | ni     | hypothetical protein                                                                              |
| 12c00026 | 0.32912  | ni     | hypothetical protein                                                                       | um06061   | 0.2325  | ni     | conserved hypothetical protein                                                                    |
| 12c00046 | 0.32948  | K06185 | predicted transporter                                                                      | um03763   | 0.23252 | K00384 | probable TRR2 - thioredoxin-disulfide reductase                                                   |
| 11c00073 | 0.32959  | ni     | hypothetical protein                                                                       | um06412   | 0.23256 | K03177 | related to RNA pseudouridine synthase B                                                           |
| 9d00131  | 0.32974  | ni     | hypothetical protein                                                                       | um06412   | 0.2326  | ni     | related to Paxillin                                                                               |
| 3d00070  | 0.32981  | ni     | hypothetical protein                                                                       | um10176   | 0.23279 | ni     | conserved hypothetical protein                                                                    |
| 22c00036 | 0.32983  | K02905 | 60S ribosomal protein L29                                                                  | um12001   | 0.23283 | ni     | probable NADH-ubiquinone oxidoreductase 12 kDa subunit                                            |
| 13c00102 | 0.32991  | ni     | predicted ATR1 protein                                                                     | um10119   | 0.23292 | ni     | conserved hypothetical protein                                                                    |
| 6c00102  | 0.33     | K01802 | phosphotyrosyl phosphatase activator                                                       | um06141   | 0.23293 | ni     | hypothetical protein                                                                              |
| 14d00100 | 0.33009  | ni     | hypothetical protein                                                                       | um06475   | 0.2334  | ni     | hypothetical protein                                                                              |
| 9d00015  | 0.3301   | K10703 | protein tyrosine phosphatase-like protein PTPLA                                            | um01946   | 0.23351 | ni     | putative protein                                                                                  |
| 9d00137  | 0.3301   | ni     | M-phase inducer phosphatase                                                                | um11481   | 0.23357 | K09885 | related to aquaporin                                                                              |
| 8c00130  | 0.33051  | ni     | hypothetical protein                                                                       | um00492   | 0.23373 | ni     | putative protein                                                                                  |
| 8c00088  | 0.3307   | K02992 | ribosomal protein S7                                                                       | um10257   | 0.23377 | K09648 | related to inner mitochondrial membrane peptidase 2                                               |
| 24d00028 | 0.33075  | ni     | hypothetical protein                                                                       | um11697   | 0.23378 | ni     | conserved hypothetical protein                                                                    |
| 10d00022 | 0.33092  | ni     | vagin                                                                                      | um02755   | 0.23385 | ni     | conserved hypothetical protein                                                                    |
| 11c00039 | 0.331    | ni     | hypothetical protein                                                                       | um04254   | 0.23393 | K15489 | conserved hypothetical protein                                                                    |
| 5d00133  | 0.33102  | K06677 | chromosome condensation complex Condensin, subunit D2                                      | um02053   | 0.23416 | K06671 | related to Nuclear cohesin complex subunit                                                        |
| 9c00201  | 0.33111  | ni     | hypothetical protein                                                                       | um04079   | 0.23423 | ni     | hypothetical protein                                                                              |
| 9c00437  | 0.33119  | K12176 | COP9 signalosome, subunit CSN2                                                             | um05334   | 0.23437 | K03015 | probable DNA-directed RNA polymerase II chain Rpb7                                                |
| 5d00111  | 0.3314   | ni     | hypothetical protein                                                                       | um02414   | 0.23455 | K05545 | related to A                                                                                      |
| 22d00235 | 0.33142  | ni     | hypothetical protein                                                                       | um10192   | 0.23462 | ni     | related to TMS1 protein                                                                           |
| 19d00085 | 0.33143  | ni     | hypothetical protein                                                                       | um02439   | 0.23469 | K14816 | conserved hypothetical protein                                                                    |
| 7400256  | 0.33158  | K00102 | proteins containing the FAD binding domain                                                 | um03097   | 0.2348  | ni     | related to Mimitin                                                                                |
| 22d00022 | 0.3316   | ni     | hypothetical protein                                                                       | um03851   | 0.23487 | K01939 | probable ADE12 - adenylosuccinate synthetase                                                      |
| 3d00037  | 0.33163  | K03676 | glutaredoxin and related proteins                                                          | um12147.2 | 0.23502 | ni     | conserved hypothetical protein                                                                    |
| 18c00030 | 0.33168  | ni     | hypothetical protein                                                                       | um00355   | 0.23521 | ni     | related to SG11 protein                                                                           |
| 9c00273  | 0.33189  | ni     | predicted phospholipase                                                                    | um03875   | 0.2353  | ni     | conserved hypothetical protein                                                                    |
| 11d00015 | 0.33206  | K11352 | NADH:ubiquinone oxidoreductase, B17.2 subunit                                              | um03433   | 0.2355  | ni     | putative protein                                                                                  |
| 7d00037  | 0.33212  | ni     | hypothetical protein                                                                       | um04758   | 0.23569 | K10598 | related to Peptidyl-prolyl cis-trans isomerase                                                    |
| 6d00094  | 0.33217  | K00681 | gamma-glutamyltransferase                                                                  | um01316   | 0.23586 | ni     | related to CLC1 - clam light chain                                                                |
| 9d00374  | 0.33226  | ni     | DNA repair protein RAD18                                                                   | um04723   | 0.23611 | K14963 | probable wd-repeat protein 5                                                                      |
| 26d00019 | 0.3323   | ni     | ankyrin                                                                                    | um15011.2 | 0.2362  | K04728 | related to TEL1 - telomere length control protein                                                 |
| 20c00012 | 0.33278  | ni     | hypothetical protein                                                                       | um02531   | 0.23632 | ni     | related to nucleotide diphosphatase                                                               |
| 6d00097  | 0.33305  | ni     | hypothetical protein                                                                       | um01481   | 0.23649 | ni     | conserved hypothetical protein                                                                    |
| 7400063  | 0.33318  | ni     | uncharacterized conserved protein                                                          | um06316   | 0.2365  | ni     | related to GW11 - GPI-anchored wall transfer protein                                              |
| 18d0007  | 0.33325  | K13352 | peroxisomal biogenesis protein                                                             | um02062   | 0.23658 | ni     | related to multidrug resistance proteins                                                          |
| 13d00066 | 0.33328  | K00940 | nucleoside diphosphate kinase                                                              | um04318   | 0.23671 | K05906 | related to Prenylcysteine oxidase precursor                                                       |
| 19c00043 | 0.33328  | ni     | lyso-phospholipase                                                                         | um00890   | 0.23672 | ni     | putative protein                                                                                  |
| 22c00155 | 0.33333  | ni     | cytochrome P450 CYP4/CYP19/CYP26 subfamilies                                               | um03471   | 0.23679 | ni     | putative protein                                                                                  |
| 4d00032  | 0.33337  | ni     | predicted fumarylacetoacetate hydratase                                                    | um06377   | 0.23684 | K03259 | related to translation initiation factor eIF-4E                                                   |
| 20c00056 | 0.33359  | K11664 | hypothetical protein                                                                       | um11524   | 0.2369  | ni     | hypothetical protein                                                                              |
| 12c00050 | 0.3339   | ni     | hypothetical protein                                                                       | um11467   | 0.23692 | ni     | conserved hypothetical protein                                                                    |
| 14d00023 | 0.33393  | ni     | predicted E3 ubiquitin ligase                                                              | um00578   | 0.23698 | ni     | maturing type locus                                                                               |
| 18d00054 | 0.33417  | ni     | hypothetical protein                                                                       | um10772   | 0.23706 | ni     | putative protein                                                                                  |
| 22c00051 | 0.33419  | ni     | nuclear transport receptor KAP120                                                          | um04033   | 0.23709 | ni     | hypothetical protein                                                                              |
| 14d00102 | 0.33426  | ni     | hypothetical protein                                                                       | um04029   | 0.23715 | ni     | conserved hypothetical protein                                                                    |
| 19d00142 | 0.33432  | ni     | hypothetical protein                                                                       | um05912   | 0.23727 | K04799 | probable DNA repair endonuclease rad2                                                             |
| 13c00119 | 0.33445  | ni     | uncharacterized conserved protein                                                          | um11005   | 0.23731 | K02259 | related to COX15 - cytochrome oxidase assembly factor                                             |
| 16d00067 | 0.33464  | ni     | SPRY domain-containing proteins                                                            | um06193   | 0.23732 | K11294 | related to NSR1 - nuclear localization sequence binding protein                                   |
| 20c00051 | 0.33465  | ni     | hypothetical protein                                                                       | um05841   | 0.23748 | K15105 | related to calcium-binding mitochondrial carrier protein                                          |
| 7d00025  | 0.33471  | K07140 | uncharacterized Fe-S protein                                                               | um05454   | 0.23757 | K12829 | probable Splicing factor 3b                                                                       |
| 10c00250 | 0.3348   | K00940 | ribosomal protein S8                                                                       | um03493   | 0.23763 | ni     | putative protein                                                                                  |
| 3d00025  | 0.33498  | K00898 | phosphatidylinositol 4-kinase                                                              | um04984   | 0.23763 | ni     | conserved hypothetical protein                                                                    |
| 11d00041 | 0.33     |        |                                                                                            |           |         |        |                                                                                                   |

|          |         |        |                                                               |           |         |        |                                                                                                     |
|----------|---------|--------|---------------------------------------------------------------|-----------|---------|--------|-----------------------------------------------------------------------------------------------------|
| 19d0090  | 0.33715 | K02985 | 40S ribosomal protein S3                                      | um02249   | 0.23998 | ni     | probable vacuolar protein sorting protein VpsB                                                      |
| 7602017  | 0.33725 | ni     | hypothetical protein                                          | um12041   | 0.24001 | ni     | related to LSB6 - Phosphatidylinositol 4-kinase                                                     |
| 2000025  | 0.33733 | ni     | hypothetical protein                                          | um10808   | 0.24005 | ni     | putative protein                                                                                    |
| 9d00026  | 0.33733 | K13093 | transcription elongation factor TAT-SF1                       | um00162   | 0.24011 | ni     | hypothetical protein                                                                                |
| 3d00048  | 0.33739 | ni     | hypothetical protein                                          | um04804   | 0.24024 | ni     | hypothetical protein                                                                                |
| 1400018  | 0.3374  | ni     | hypothetical protein                                          | um01281   | 0.24035 | K15378 | related to general alpha-glucoside permease                                                         |
| 4d00004  | 0.33741 | K15109 | mitochondrial carnitine-acylcarnitine carrier protein         | um03364   | 0.2404  | K12821 | related to Formin binding protein 3                                                                 |
| 7600182  | 0.33743 | K12811 | RNA 4743                                                      | um01674   | 0.24057 | K03535 | related to COO1 - hexanoyl pyrophosphate synthetase precursor                                       |
| 22c0020  | 0.33752 | K04794 | uncharacterized conserved protein                             | um02474   | 0.24065 | ni     | conserved hypothetical protein                                                                      |
| 8d00036  | 0.33752 | ni     | molysdenum cofactor sulfatase                                 | um03956   | 0.24076 | K03964 | conserved hypothetical protein                                                                      |
| 5d00047  | 0.33756 | ni     | hypothetical protein                                          | um02506   | 0.24082 | ni     | conserved hypothetical protein                                                                      |
| 13c00009 | 0.33765 | K12200 | predicted signal transduction protein                         | um01701   | 0.24209 | ni     | hypothetical protein                                                                                |
| 8d00060  | 0.33786 | K00128 | aldohyde dehydrogenase                                        | um02666   | 0.24097 | ni     | putative protein                                                                                    |
| 2c00024  | 0.338   | ni     | ni                                                            | um11692   | 0.241   | K16575 | probable contractin                                                                                 |
| 5d00048  | 0.33802 | K08738 | cytochrome c                                                  | um12212   | 0.24138 | ni     | related to ATP10 - F1F0 ATPase complex assembly protein                                             |
| 8d00081  | 0.33805 | ni     | hypothetical protein                                          | um10115   | 0.24143 | ni     | hypothetical protein                                                                                |
| 7d00089  | 0.33816 | ni     | hypothetical protein                                          | um04599   | 0.24143 | K12849 | related to PRP38A - pre-mRNA-splicing factor                                                        |
| 9d00164  | 0.33822 | K13119 | uncharacterized conserved protein XAP-5                       | um11606   | 0.24149 | ni     | putative protein                                                                                    |
| 24c0038  | 0.33829 | K12882 | nuclear cap-binding complex, subunit NCBP1/CBP80              | um05456   | 0.24156 | ni     | conserved hypothetical protein                                                                      |
| 19c00050 | 0.33836 | K00275 | pyridoxamine-phosphate oxidase                                | um10121   | 0.24162 | ni     | putative protein                                                                                    |
| 7d00062  | 0.33842 | ni     | hypothetical protein                                          | um15076   | 0.24163 | ni     | hypothetical protein                                                                                |
| 14c00040 | 0.3386  | K05759 | putifin                                                       | um11495   | 0.2417  | K03956 | related to nadh-ubiquinone oxidoreductase 21                                                        |
| 22d0079  | 0.33864 | K02963 | hypothetical protein                                          | um06428   | 0.24204 | K01078 | related to Thiamine-repressible acid phosphatase precursor                                          |
| 22d00202 | 0.33864 | ni     | cytosolic sorting protein GGA2/TOM1                           | um11671.2 | 0.24224 | ni     | putative protein                                                                                    |
| 11d00089 | 0.33868 | ni     | sulfatase                                                     | um11407   | 0.24224 | ni     | conserved hypothetical protein                                                                      |
| 12d00043 | 0.33871 | K14967 | histone H3 (Lys4) methyltransferase complex, subunit CPS60/AS | um02429   | 0.24225 | ni     | putative protein                                                                                    |
| 7d00243  | 0.339   | K00823 | acetylornithine aminotransferase                              | um11169   | 0.24231 | ni     | conserved hypothetical protein                                                                      |
| 19c00111 | 0.33903 | K15437 | tRNA-binding protein                                          | um02015   | 0.24265 | K00876 | related to uridine kinase                                                                           |
| 26d0068  | 0.33916 | ni     | hypothetical protein                                          | um02827   | 0.24278 | ni     | conserved hypothetical protein                                                                      |
| 20d00018 | 0.33947 | K00162 | pyruvate dehydrogenase E1, beta subunit                       | um03777   | 0.24281 | K11841 | related to Ubiquitin carboxyl-terminal hydrolase 10                                                 |
| 2c00036  | 0.3395  | ni     | hypothetical protein                                          | um01032   | 0.24281 | ni     | probable NHRB - nonhistone chromosomal protein                                                      |
| 15c00041 | 0.3398  | ni     | uncharacterized conserved protein                             | um02018   | 0.24299 | ni     | conserved hypothetical protein                                                                      |
| 22d00278 | 0.3404  | ni     | hypothetical protein                                          | um06140.2 | 0.24328 | ni     | related to programmed cell death protein                                                            |
| 9d00061  | 0.3406  | K03942 | NADH-ubiquinone oxidoreductase, NDUFV1/51kDa subunit          | um15046   | 0.24331 | ni     | conserved hypothetical protein                                                                      |
| 14d00008 | 0.3408  | K11572 | hypothetical protein                                          | um00293   | 0.24332 | K12599 | probable SKZ - putative RNA helicase                                                                |
| 22c00241 | 0.34116 | ni     | inositol 1,4,5-trisphosphate 5-phosphatase                    | um05391   | 0.24347 | ni     | conserved hypothetical protein                                                                      |
| 7d00174  | 0.34143 | ni     | hypothetical protein                                          | um03252   | 0.24354 | K03033 | probable 28S proteasome non-ATPase regulatory subunit p58                                           |
| 22d00126 | 0.34153 | K00143 | non-ribosomal peptide synthetase                              | um11302   | 0.24413 | ni     | related to p33ING1b                                                                                 |
| 4d00008  | 0.34158 | ni     | hypothetical protein                                          | um05506   | 0.24428 | K15280 | conserved hypothetical protein                                                                      |
| 12d00338 | 0.34173 | ni     | hypothetical protein                                          | um02419   | 0.24438 | ni     | conserved hypothetical protein                                                                      |
| 5d00108  | 0.34198 | ni     | hypothetical protein                                          | um00741   | 0.24452 | K03125 | related to TAF1 - TFIID subunit                                                                     |
| 12c00104 | 0.34205 | K12581 | mRNA deadenylation subunit                                    | um02156.2 | 0.24453 | ni     | conserved hypothetical protein                                                                      |
| 5c00077  | 0.34212 | ni     | hypothetical protein                                          | um04355   | 0.24454 | K14026 | related to Sel-1 homolog precursor                                                                  |
| 10d00066 | 0.34223 | ni     | hypothetical protein                                          | um15070   | 0.24468 | ni     | probable GDP                                                                                        |
| 7d00094  | 0.34234 | ni     | histone acetyltransferase SAGA/ADA, catalytic subunit PCAF/IG | um04248   | 0.24479 | ni     | putative protein                                                                                    |
| 12c00084 | 0.34243 | ni     | hypothetical protein                                          | um01501   | 0.24486 | K09704 | conserved hypothetical protein                                                                      |
| 14c00102 | 0.34246 | ni     | RAN guanine nucleotide release factor                         | um10006   | 0.24487 | K14002 | related to SCJ1 protein                                                                             |
| 8d00131  | 0.34262 | ni     | hypothetical protein                                          | um03145   | 0.24495 | K12590 | conserved hypothetical protein                                                                      |
| 11d00011 | 0.34308 | ni     | hypothetical protein                                          | um02540   | 0.24504 | ni     | hypothetical protein                                                                                |
| 12c00119 | 0.34357 | ni     | hypothetical protein                                          | um05427   | 0.24513 | ni     | ni                                                                                                  |
| 22d00232 | 0.34358 | ni     | aspartyl-tRNA synthetase                                      | um02202   | 0.24517 | ni     | putative protein                                                                                    |
| 26c0019  | 0.34363 | ni     | heterochromatin-associated protein HP1 and related CHROMO D   | um10956   | 0.24527 | K02942 | probable RPP1A - 60S large subunit acidic ribosomal protein a1                                      |
| 7d00048  | 0.34368 | ni     | hypothetical protein                                          | um04916   | 0.24545 | ni     | putative protein                                                                                    |
| 7d00241  | 0.34384 | K08773 | rac GTPase-activating protein BCR/ABR                         | um00592   | 0.24546 | K04508 | related to Nuclear receptor co-repressor                                                            |
| 8d00077  | 0.34384 | ni     | transcription-associated recombination protein - Thp1p        | um05481   | 0.24563 | ni     | conserved hypothetical protein                                                                      |
| 10c00030 | 0.34389 | ni     | hypothetical protein                                          | um03815   | 0.24572 | K01868 | probable MST1 - threonine-tRNA ligase                                                               |
| 14c00050 | 0.34395 | ni     | hypothetical protein                                          | um05876   | 0.2461  | ni     | putative protein                                                                                    |
| 14d00024 | 0.34409 | ni     | FOG - FHL2 domain                                             | um11213   | 0.24612 | K12591 | related to PRP6 - Exonuclease component of the nuclear exosome                                      |
| 15d00011 | 0.34414 | ni     | predicted transporter                                         | um10176   | 0.2464  | K04567 | probable lysyl-tRNA synthetase                                                                      |
| 14c00036 | 0.34417 | K14018 | phospholipase A2-activating protein                           | um05680   | 0.24656 | ni     | putative protein                                                                                    |
| 25d00095 | 0.34422 | K01811 | glucosidase II catalytic (alpha) subunit                      | um15058   | 0.24659 | ni     | conserved hypothetical protein                                                                      |
| 9c00061  | 0.3443  | ni     | conserved protein                                             | 0.24663   | K02155  | ni     | probable CUP5 - proteolipid subunit of the vacuolar H                                               |
| 11d00001 | 0.34433 | ni     | hypothetical protein                                          | um04676   | 0.2467  | ni     | putative protein                                                                                    |
| 25c00053 | 0.34445 | ni     | hypothetical protein                                          | um15102   | 0.24691 | K14311 | putative protein                                                                                    |
| 13d00021 | 0.34484 | ni     | permease of the major facilitator superfamily                 | um05679   | 0.24719 | ni     | related to Protein-tyrosine phosphatase gamma precursor                                             |
| 11c00084 | 0.34485 | ni     | reductases with broad range of substrate specificities        | um11702   | 0.24754 | ni     | conserved hypothetical protein                                                                      |
| 10d00012 | 0.34495 | ni     | hypothetical protein                                          | 0.24767   | K02902  | ni     | related to MRPL24 - mitochondrial ribosomal protein                                                 |
| 7d00146  | 0.34497 | K12622 | small nuclear ribonucleoprotein                               | um02222   | 0.24776 | ni     | related to membrane protein Dik6                                                                    |
| 8c00127  | 0.34507 | ni     | hypothetical protein                                          | um05930   | 0.24778 | ni     | conserved hypothetical Ustilago-specific protein                                                    |
| 16d00065 | 0.34509 | ni     | cyclin                                                        | um05318   | 0.2478  | ni     | hypothetical protein                                                                                |
| 1c00023  | 0.34519 | ni     | hypothetical protein                                          | um10805   | 0.24786 | K01120 | conserved hypothetical protein                                                                      |
| 5d00074  | 0.34531 | ni     | hypothetical protein                                          | um03618   | 0.24797 | K00877 | related to TH121 - Hydroxymethylpyrimidine phosphate kinase                                         |
| 9c00042  | 0.34544 | K01011 | mercaptopyruvate sulfurtransferase                            | um01152   | 0.24828 | ni     | conserved hypothetical protein                                                                      |
| 8d00087  | 0.34556 | K10416 | yeast light intermediate chain                                | um03598   | 0.24843 | K12471 | related to ENT2 - clathrin binding protein                                                          |
| 14c00024 | 0.34586 | K02684 | eukaryotic-type DNA primase, catalytic                        | um00964   | 0.24882 | ni     | related to papsin precursor                                                                         |
| 5c00025  | 0.34588 | ni     | phosphorylase mutase                                          | um00251   | 0.24883 | ni     | Kinesin-3 motor protein                                                                             |
| 19c00085 | 0.34613 | ni     | hypothetical protein                                          | um00210   | 0.24928 | ni     | conserved hypothetical protein                                                                      |
| 8c00129  | 0.34628 | K01188 | beta-glucosidase, lactase phlorizinhydrolase                  | um04152   | 0.24952 | K03235 | probable YEF3 - translation elongation factor eEF3                                                  |
| 13d00065 | 0.34629 | ni     | reductases with broad range of substrate specificities        | um03172   | 0.24972 | ni     | related to Zinc finger protein                                                                      |
| 14c00081 | 0.34634 | ni     | hypothetical protein                                          | um04924   | 0.24975 | ni     | related to Par-hesmer repeat protein 5                                                              |
| 9c00045  | 0.34662 | ni     | hypothetical protein                                          | um02719   | 0.2498  | ni     | related to DJP1 - DnaJ-like protein                                                                 |
| 20c00075 | 0.34664 | ni     | WD repeat protein WDR4                                        | um02863   | 0.25017 | ni     | conserved hypothetical protein                                                                      |
| 27c00060 | 0.3467  | K01855 | pseudouridylylase synthase                                    | um01381   | 0.25041 | ni     | conserved hypothetical protein                                                                      |
| 16c00021 | 0.34673 | ni     | predicted E3 ubiquitin ligase                                 | um10442   | 0.25044 | K11558 | conserved hypothetical protein                                                                      |
| 2d00026  | 0.3468  | K02881 | 40S ribosomal protein S2/30S ribosomal protein S5             | um01131   | 0.25044 | K01669 | related to TUBB1 - GTP cyclohydrolase II                                                            |
| 20c00019 | 0.34691 | ni     | hypothetical protein                                          | um04061   | 0.25046 | ni     | related to glycerate dehydrogenase                                                                  |
| 6d00055  | 0.34714 | ni     | hypothetical protein                                          | um06265   | 0.25062 | ni     | related to Retrovirus-related POL polyprotein                                                       |
| 13d00070 | 0.34714 | ni     | inositol polyphosphate 5-phosphatase and related proteins     | um01982   | 0.25073 | ni     | related to aminotriazole resistance protein                                                         |
| 9d000274 | 0.34722 | K03063 | glucosyltransferase-3                                         | um00852   | 0.25077 | K02875 | probable NPL4B - ribosomal protein                                                                  |
| 5c00120  | 0.34723 | K01535 | plasma membrane H+-transporting ATPase                        | um11968   | 0.25081 | ni     | related to MKT1 - retroviral protease signature protein                                             |
| 22c00021 | 0.34725 | ni     | hypothetical protein                                          | um10624.2 | 0.25083 | ni     | related to LCB2 - serine C-palmitoyltransferase subunit                                             |
| 11c00040 | 0.34726 | ni     | hypothetical protein                                          | um11983   | 0.25084 | K12834 | probable Pre-mRNA splicing factor in1                                                               |
| 6c00067  | 0.34767 | ni     | hypothetical protein                                          | um06428.2 | 0.25098 | ni     | conserved hypothetical protein                                                                      |
| 13d00101 | 0.34768 | K14830 | WD40 repeat-containing protein                                | um04826   | 0.25105 | K01497 | related to TUBB1 - GTP cyclohydrolase II                                                            |
| 24d00001 | 0.3478  | ni     | enoyl-coa hydratase                                           | um06450   | 0.25112 | K04739 | cAMP-dependent protein kinase type II regulatory chain                                              |
| 7d00297  | 0.34785 | ni     | hypothetical protein                                          | um04168   | 0.25119 | K11360 | related to Transcription factor SPT8                                                                |
| 22d0194  | 0.34789 | K01078 | lysosomal & prostatic acid phosphatases                       | um01559   | 0.25141 | ni     | conserved hypothetical protein                                                                      |
| 9d00078  | 0.34791 | K14758 | casein kinase                                                 | um02118   | 0.25147 | ni     | putative protein                                                                                    |
| 3d00089  | 0.3484  | K14850 | predicted RNA methylase                                       | um00145   | 0.25152 | K08851 | related to p53-related protein kinase                                                               |
| 14d00015 | 0.34855 | K01689 | enolase                                                       | um01612   | 0.25155 | ni     | conserved hypothetical protein                                                                      |
| 18d00091 | 0.34867 | ni     | hypothetical protein                                          | um12301   | 0.25155 | ni     | putative protein                                                                                    |
| 19c00061 | 0.34876 | ni     | uncharacterized conserved protein                             | um00342   | 0.25181 | ni     | hypothetical protein                                                                                |
| 9c00066  | 0.3488  | ni     | predicted methyltransferase                                   | um1185.2  | 0.25181 | ni     | conserved hypothetical protein                                                                      |
| 9c00210  | 0.3488  | K11569 | hypothetical protein                                          | um03644   | 0.25183 | ni     | hypothetical protein                                                                                |
| 18d00085 | 0.34884 | ni     | hypothetical protein                                          | um10536   | 0.25201 | K09569 | related to FPR2 - FK506                                                                             |
| 7d00030  | 0.34897 | K11366 | ubiquitin-specific protease                                   | um05584   | 0.2521  | K00963 | probable UTP-glucose-1-phosphate uridylyltransferase                                                |
| 22c0024  | 0.34921 | ni     | hypothetical protein                                          | um02221   | 0.25217 | ni     | conserved hypothetical Ustilago-specific protein                                                    |
| 22c0020  | 0.34953 | ni     | hypothetical protein                                          | um02194   | 0.25223 | ni     | hypothetical protein                                                                                |
| 22d00246 | 0.34958 | ni     | hypothetical protein                                          | um10623   | 0.25232 | ni     | related to Tuberin                                                                                  |
| 22d00003 | 0.34959 | K00787 | polyprenyl synthetase                                         | um11336   | 0.25236 | ni     | conserved hypothetical protein                                                                      |
| 12d00095 | 0.34964 | ni     | hypothetical protein                                          | um02137   | 0.25252 | ni     | effector family protein Eff1-7                                                                      |
| 25d00011 | 0.34973 | ni     | pleiotropic drug resistance proteins                          | um01241   | 0.25254 | ni     | hypothetical protein                                                                                |
| 25d00091 | 0.34979 | ni     | predicted transporter                                         | um00569   | 0.25259 | ni     | related to GTP-binding protein                                                                      |
| 3d00015  | 0.34981 | ni     | predicted ER membrane protein                                 | um00097   | 0.25278 | ni     | ni                                                                                                  |
| 22c00267 | 0.34993 | K01477 | hypothetical protein                                          | um04563   | 0.25281 | ni     | ni                                                                                                  |
| 18c00069 | 0.34996 | ni     | reductases with broad range of substrate specificities        | um02500.2 | 0.25303 | ni     | conserved hypothetical protein                                                                      |
| 7d00021  | 0.34998 | K06911 | hypothetical protein                                          | um04365   | 0.25315 | ni     | conserved hypothetical protein                                                                      |
| 18c00058 | 0.35004 | ni     | WD40 repeat-containing protein                                | um03413   | 0.25318 | K00925 | related to Acetate kinase                                                                           |
| 22c00027 | 0.35007 | K04713 | sphingolipid hydroxylase                                      | um10334   | 0.25349 | K02985 | probable 40S ribosomal protein S3                                                                   |
| 48d00001 | 0.35009 | K00412 | ni                                                            | um00085   | 0.25358 | ni     | conserved hypothetical protein                                                                      |
| 22d00245 | 0.35016 | ni     | hypothetical protein                                          | um10177   | 0.25391 | K04640 | guanine nucleotide-binding protein alpha-1 subunit                                                  |
| 4d00029  | 0.35023 | ni     | hypothetical protein                                          | um05264   | 0.25411 | ni     | probable glutathione-dependent formaldehyde dehydrogenase                                           |
| 24c00012 | 0.35029 | ni     | hypothetical protein                                          | um04067   | 0.25436 | K14830 | related to MAK11 protein                                                                            |
| 22c00040 | 0.35031 | K11251 | histone 2A                                                    | um02272   | 0.25443 | ni     | putative protein                                                                                    |
| 9d00027  | 0.35052 | ni     | hypothetical protein                                          | um12255   | 0.2545  | ni     | conserved hypothetical protein                                                                      |
| 6d00088  | 0.35046 | ni     | hypothetical protein                                          | um01166   | 0.25456 | ni     | related to APG2 - required for sporulation                                                          |
| 19d0160  | 0.35047 | ni     | tyrosine kinase specific for activated                        | um00553   | 0.25466 | ni     | related to GTPase activating protein sec2                                                           |
| 13d00013 | 0.35047 | K07407 | hypothetical protein                                          | um03018   | 0.25494 | K15262 | related to BCP1 - Essential protein involved in nuclear export of cytoskeleton organization protein |
| 9d00106  | 0.35054 | ni     | hypothetical protein                                          | um11199   | 0.25499 | K08818 | related to CDC28 - cyclin-dependent protein kinase                                                  |
| 22d00296 | 0.35058 | K14860 | hypothetical protein                                          | um12294   | 0.25504 | ni     | conserved hypothetical protein                                                                      |
| 25d00069 | 0.35082 | K00685 | arginyl-tRNA-protein transferase                              | um05149   | 0.25523 | ni     | ni                                                                                                  |
| 12d00049 | 0.35088 | ni     | carboxylesterase and related proteins                         | um00731   | 0.25561 | ni     | hypothetical protein                                                                                |
| 19c00080 | 0.35092 | K06990 | predicted diacylglycerol                                      | um00645   | 0.25562 | ni     | conserved hypothetical protein                                                                      |
| 15c00051 | 0.35114 | K14530 | hypothetical protein                                          | um03518   | 0.25581 | ni     | putative protein                                                                                    |
| 19d00151 | 0.35114 | K00942 | guanylate kinase                                              | um06239   | 0.25591 | ni     | related to phosphatidylinositol 3-phosphate 5-kinase                                                |
| 12c00103 | 0.35118 | K12581 | mRNA deadenylation subunit                                    | um02803   | 0.25643 | ni     | related to beta-1                                                                                   |
| 3d0      |         |        |                                                               |           |         |        |                                                                                                     |

|          |         |        |                                                                 |           |         |        |                                                                                           |
|----------|---------|--------|-----------------------------------------------------------------|-----------|---------|--------|-------------------------------------------------------------------------------------------|
| 9c00239  | 0.35372 | K00605 | aminomethyl transferase                                         | um06513   | 0.25787 | ni     | conserved hypothetical protein                                                            |
| 26c0076  | 0.35374 | K01262 | putative Xaa-Pro aminopeptidase                                 | um06195   | 0.25794 | K14568 | related to EMG1 - Protein required for ribosome biogenesis                                |
| 6c00097  | 0.35378 | ni     | hypothetical protein                                            | um02196   | 0.25797 | ni     | hypothetical protein                                                                      |
| 13c0089  | 0.35383 | ni     | hypothetical protein                                            | um01433   | 0.25802 | K06689 | probable UBC5 - E2 ubiquitin-conjugating enzyme                                           |
| 22c00270 | 0.35398 | K01725 | hypothetical protein                                            | um02769   | 0.25838 | ni     | conserved hypothetical protein                                                            |
| 5c05102  | 0.35399 | ni     | hypothetical protein                                            | um01942   | 0.25839 | K01273 | related to Microsomal dipeptidase precursor                                               |
| 7d00291  | 0.35406 | K11121 | sirtuin 5 and related class III sirtuins                        | um10122   | 0.25846 | ni     | hypothetical protein                                                                      |
| 18c00005 | 0.35407 | ni     | hypothetical protein                                            | um15033   | 0.25865 | ni     | related to ABC transporter                                                                |
| 6c00099  | 0.35408 | ni     | hypothetical protein                                            | um12177   | 0.25873 | K00854 | probable XKS1 - xylokinase                                                                |
| 18c00019 | 0.35412 | ni     | hypothetical protein                                            | um00988   | 0.25878 | ni     | conserved hypothetical protein                                                            |
| 10d00048 | 0.3542  | ni     | hypothetical protein                                            | um04080   | 0.25882 | K11594 | probable DED1 - ATP-dependent RNA helicase                                                |
| 16d00045 | 0.35421 | K15148 | hypothetical protein                                            | um11758   | 0.25886 | ni     | conserved hypothetical protein                                                            |
| 6c00009  | 0.35423 | ni     | hypothetical protein                                            | um04549   | 0.25903 | K12587 | conserved hypothetical protein                                                            |
| 5c00092  | 0.35454 | K01560 | hypothetical protein                                            | um05303   | 0.25906 | ni     | hypothetical protein                                                                      |
| 7d00289  | 0.35461 | K12659 | N-acetyl-gamma-glutamyl-phosphate reductase                     | um05027   | 0.25915 | ni     | hypothetical protein                                                                      |
| 5c00143  | 0.35469 | ni     | hypothetical protein                                            | um10597   | 0.25916 | K03648 | related to UNG1 - Uracil-DNA glycosylase                                                  |
| 9c00351  | 0.35471 | K12179 | COP9 signalosome, subunit CSN6                                  | um10577   | 0.25934 | ni     | related to prelinin subunit 3                                                             |
| 8c00018  | 0.35485 | K04486 | hypothetical protein                                            | um03099   | 0.25948 | ni     | putative protein                                                                          |
| 19c00114 | 0.35498 | ni     | hypothetical protein                                            | um02676   | 0.25957 | K12869 | probable protein CCN1 - putative cell cycle control protein                               |
| 15c00029 | 0.355   | ni     | hypothetical protein                                            | um00685   | 0.25959 | K11131 | probable CBF5 - Centromere Binding Factor                                                 |
| 15d00082 | 0.35502 | ni     | hypothetical protein                                            | um10497   | 0.2596  | ni     | related to 3-oxo-phenylalanine reductase                                                  |
| 24c00037 | 0.35514 | ni     | ferric reductase-like proteins                                  | um01245   | 0.25967 | K00052 | probable LEU2 - beta-isopropyl-malate dehydrogenase                                       |
| 7c00031  | 0.3552  | K11321 | hypothetical protein                                            | um15061.2 | 0.25977 | ni     | conserved hypothetical protein                                                            |
| 7d00139  | 0.35522 | ni     | hypothetical protein                                            | um02021   | 0.26017 | ni     | conserved hypothetical protein                                                            |
| 7d00318  | 0.35543 | ni     | uncharacterized conserved protein                               | um10189   | 0.26022 | K03657 | related to ATP-dependent DNA helicase                                                     |
| 5d00107  | 0.35553 | ni     | hypothetical protein                                            | um00438   | 0.26028 | ni     | conserved hypothetical protein                                                            |
| 7d00140  | 0.35555 | ni     | hypothetical protein                                            | um00616   | 0.26036 | ni     | putative protein                                                                          |
| 1c00024  | 0.35564 | K11592 | dRNA-specific nuclease Dicer and related ribonucleases          | um05002   | 0.26042 | ni     | related to 7alpha-cephem-hydroxylase P8 chain                                             |
| 14c00125 | 0.35567 | ni     | hypothetical protein                                            | um00419   | 0.26049 | ni     | related to atp-dependent rna helicase                                                     |
| 6c00007  | 0.35568 | ni     | sexual differentiation process protein ISP4                     | um11224   | 0.26066 | ni     | putative protein                                                                          |
| 7d000314 | 0.35581 | K14807 | DEAD-box ATP-dependent RNA helicase                             | um00192   | 0.26073 | K10858 | related to PMS1 - DNA mismatch repair protein                                             |
| 4d00026  | 0.35582 | ni     | ATP-dependent RNA helicase pitchoun                             | um02365   | 0.26082 | K15100 | probable CTP1 - Mitochondrial citrate transporter - member of the mitochondrial carrier   |
| 14c00021 | 0.35605 | ni     | hypothetical protein                                            | um02754   | 0.26083 | K07936 | related to GSP1 - GTP-binding protein of the ras superfamily                              |
| 25c00027 | 0.3562  | K00273 | D-aspartate oxidase                                             | um05702   | 0.26094 | ni     | related to oxidoreductase                                                                 |
| 7d00137  | 0.3564  | ni     | hypothetical protein                                            | um03076   | 0.26098 | ni     | related to PDR16 - involved in lipid biosynthesis and multidrug resistance                |
| 7c00034  | 0.3564  | K00928 | aspartate kinase                                                | um00952   | 0.261   | K13102 | related to RTS2 - Basic zinc-finger protein                                               |
| 12c00065 | 0.35645 | K14571 | nuclear AAA ATPase                                              | um05948   | 0.26102 | ni     | hypothetical protein                                                                      |
| 26c00024 | 0.35664 | ni     | hypothetical protein                                            | um12226   | 0.26112 | ni     | putative protein                                                                          |
| 22c00089 | 0.35665 | ni     | hypothetical protein                                            | um04815   | 0.26114 | ni     | putative protein                                                                          |
| 5c00146  | 0.35673 | ni     | hypothetical protein                                            | um00271   | 0.26116 | K14763 | related to NAF1 - nuclear assembly factor                                                 |
| 7d00273  | 0.35679 | K07827 | ras-related GTPase                                              | um11657   | 0.26145 | ni     | related to actin-interacting protein AIP3                                                 |
| 10c00106 | 0.35687 | ni     | sterol reductase                                                | um10005   | 0.26147 | ni     | conserved hypothetical protein                                                            |
| 19d00043 | 0.35702 | K03177 | pseudouridine synthase                                          | um11411   | 0.2617  | K02974 | probable 40S RIBOSOMAL PROTEIN S24                                                        |
| 8d00082  | 0.35715 | ni     | hypothetical protein                                            | um02116.2 | 0.26179 | ni     | conserved hypothetical protein                                                            |
| 24d00015 | 0.35722 | K17417 | hypothetical protein                                            | um01024   | 0.26182 | ni     | hypothetical protein                                                                      |
| 9d00009  | 0.35727 | K17257 | predicted membrane protein                                      | um00284   | 0.26205 | K08515 | related to vesicle-associated membrane protein 7                                          |
| 16c00035 | 0.35729 | K02144 | vacuolar H <sup>+</sup> -ATPase V1 sector, subunit H            | um04993   | 0.2621  | ni     | putative protein                                                                          |
| 3d00009  | 0.3573  | ni     | predicted ubiquitin regulatory protein                          | um03811   | 0.26232 | K01057 | probable SOL1 - Protein with a possible role in tRNA export                               |
| 26c00008 | 0.35732 | K03000 | RNA polymerase I transcription factor TFIIIS, subunit A12.2/RPA | um04464   | 0.26243 | K11092 | related to U2 snRNP protein A                                                             |
| 9d00042  | 0.35766 | ni     | predicted MutS-related protein                                  | um04472   | 0.2625  | K11135 | conserved hypothetical protein                                                            |
| 27d00003 | 0.35773 | ni     | mitochondrial import inner membrane translocase, subunit TIM23  | um00399   | 0.26253 | ni     | conserved hypothetical protein                                                            |
| 25c00087 | 0.35779 | K06978 | hypothetical protein                                            | um00792   | 0.26264 | ni     | conserved hypothetical Ustilago-specific protein                                          |
| 22c00011 | 0.35782 | ni     | hypothetical protein                                            | um11455   | 0.26266 | K02266 | related to COX13 - cytochrome-c oxidase chain VIa                                         |
| 18c00066 | 0.35789 | ni     | hypothetical protein                                            | um01706   | 0.26268 | ni     | conserved hypothetical protein                                                            |
| 18c00027 | 0.35799 | ni     | uncharacterized conserved protein                               | um02867   | 0.2628  | K07390 | probable GRX5 - glutaredoxin                                                              |
| 8d00101  | 0.35805 | K00485 | flavin-containing monooxygenase                                 | um02792   | 0.26281 | K01697 | related to CYS4 - cystathionine beta-synthase                                             |
| 6c00071  | 0.35818 | K15428 | metalloexopeptidases                                            | um12171   | 0.26287 | ni     | conserved hypothetical protein                                                            |
| 7c00032  | 0.35819 | ni     | transcription factor 4F, helicase subunit                       | um00387   | 0.26305 | ni     | conserved hypothetical protein                                                            |
| 9c00011  | 0.35821 | K03943 | NADH:ubiquinone oxidoreductase, NDUFV2/24 kD subunit            | um00542   | 0.26307 | K10601 | conserved hypothetical protein                                                            |
| 9c00159  | 0.35853 | ni     | nitrogen permease regulator NLRG/NPR2                           | um02230   | 0.26318 | ni     | conserved hypothetical Ustilago-specific protein                                          |
| 24c00003 | 0.35857 | ni     | hypothetical protein                                            | um03313   | 0.26338 | ni     | effector family protein Eff1-3                                                            |
| 24d00019 | 0.3587  | K15414 | MAM1                                                            | um11489   | 0.26355 | ni     | conserved hypothetical protein                                                            |
| 16c00078 | 0.35871 | ni     | sensory transduction histidine kinase                           | um12089   | 0.26358 | K08851 | related to p53-related protein kinase                                                     |
| 25d00008 | 0.35872 | ni     | ypj/rab-specific GTPase-activating protein GYP1                 | um11572   | 0.26369 | K14050 | related to Rab geranylgeranyltransferase alpha subunit                                    |
| 7d00109  | 0.35877 | ni     | hypothetical protein                                            | um05573   | 0.26378 | ni     | hypothetical protein                                                                      |
| 7d00246  | 0.35883 | K00528 | ferredoxin:ferredoxin reductase                                 | um10397   | 0.26379 | K02133 | probable ATP2 - F1F0-ATPase complex                                                       |
| 6c00112  | 0.35883 | ni     | hypothetical protein                                            | um12148   | 0.26382 | ni     | conserved hypothetical protein                                                            |
| 18d00111 | 0.35883 | ni     | hypothetical protein                                            | um10133   | 0.2639  | K10768 | conserved hypothetical protein                                                            |
| 22c00123 | 0.3594  | ni     | hypothetical protein                                            | um00801   | 0.26406 | K07204 | related to KOG1 - Subunit of TORC1                                                        |
| 7c00053  | 0.35943 | ni     | ferric reductase                                                | um03225   | 0.26415 | ni     | putative protein                                                                          |
| 18d00012 | 0.35943 | ni     | transferrin, ABC superfamily                                    | um10813   | 0.2642  | ni     | conserved hypothetical protein                                                            |
| 22c00025 | 0.35952 | K14864 | SAM-dependent methyltransferase                                 | um10447   | 0.26434 | K11275 | related to Histone H1                                                                     |
| 6c00030  | 0.35954 | ni     | hypothetical protein                                            | um05313   | 0.26439 | ni     | hypothetical protein                                                                      |
| 13d00018 | 0.35957 | ni     | hypothetical protein                                            | um01526   | 0.26441 | ni     | conserved hypothetical protein                                                            |
| 12d00117 | 0.35957 | ni     | ngg1-interacting factor 3 protein NIF3L1                        | um05688   | 0.26455 | K12272 | conserved hypothetical protein                                                            |
| 10c00081 | 0.35958 | ni     | uncharacterized conserved protein                               | um01485   | 0.2646  | K05956 | probable BE12 - geranylgeranyltransferase type II beta subunit                            |
| 7d00358  | 0.35962 | K13628 | fe-s cluster biosynthesis protein ISA1                          | um11344   | 0.26464 | ni     | conserved hypothetical protein                                                            |
| 9d00037  | 0.35963 | K03458 | hypothetical protein                                            | um04836   | 0.26469 | ni     | hypothetical protein                                                                      |
| 11d00048 | 0.35968 | ni     | hypothetical protein                                            | um03268.2 | 0.2648  | K14809 | related to SPB4 - ATP-dependent RNA helicase of DEAH box family                           |
| 7c00230  | 0.35974 | ni     | uncharacterized conserved protein                               | um10145   | 0.26481 | K08286 | p21-activated kinase                                                                      |
| 15c00008 | 0.3598  | K14404 | polyadenylation factor I complex, subunit, Yth1                 | um11523   | 0.26535 | ni     | conserved hypothetical protein                                                            |
| 8c00075  | 0.35983 | K11884 | predicted RNA-binding protein Protp1 interacting with Nob1p     | um11333   | 0.26535 | K03885 | related to NDE1 - mitochondrial cytosolically directed NADH dehydrogenase                 |
| 12c00093 | 0.35987 | ni     | hypothetical protein                                            | um06046   | 0.26555 | ni     | conserved hypothetical protein                                                            |
| 2d00055  | 0.3599  | ni     | hypothetical protein                                            | um00365   | 0.26562 | ni     | hypothetical protein                                                                      |
| 9d00031  | 0.36003 | ni     | hypothetical protein                                            | um10184   | 0.26579 | ni     | conserved hypothetical protein                                                            |
| 7c00317  | 0.3602  | K04523 | ubiquitin-like protein                                          | um05438   | 0.26589 | ni     | conserved hypothetical protein                                                            |
| 12c00142 | 0.36021 | K14003 | hypothetical protein                                            | um11109   | 0.26605 | ni     | conserved hypothetical Ustilago-specific protein                                          |
| 18c00114 | 0.36023 | K09140 | uncharacterized conserved protein                               | um05256   | 0.2661  | ni     | putative protein                                                                          |
| 10c00021 | 0.3603  | ni     | hypothetical protein                                            | um03765   | 0.26622 | K01529 | probable DDE5 - ATP-dependent RNA helicase of the DEAD-box family involved in mRNA export |
| 7c00298  | 0.36048 | K08272 | conserved protein Mo25                                          | um06280   | 0.26631 | ni     | related to J kappa-recombination signal binding protein                                   |
| 26c00092 | 0.36048 | ni     | hypothetical protein                                            | um10996   | 0.26635 | ni     | conserved hypothetical protein                                                            |
| 3d00096  | 0.36062 | K02935 | mitochondrial/chloroplast ribosomal protein L12                 | um04702   | 0.2664  | K01764 | related to CYT2 - holocytochrome-c1 synthase                                              |
| 8d00017  | 0.36062 | K03005 | RNA polymerase I 49 kDa subunit                                 | um05148   | 0.26649 | K10884 | related to ATP-dependent DNA helicase II                                                  |
| 13c00049 | 0.36083 | ni     | FOG1 - Predicted E3 ubiquitin ligase                            | um11073   | 0.26659 | ni     | conserved hypothetical protein                                                            |
| 18c00093 | 0.36088 | ni     | hypothetical protein                                            | um10429   | 0.26659 | K03010 | probable DNA-dependent RNA polymerase II RPB140                                           |
| 10c00065 | 0.36102 | ni     | hypothetical protein                                            | um05809   | 0.26685 | ni     | related to KRE6 - glucan synthase subunit                                                 |
| 22c00229 | 0.36119 | K10480 | arginase family protein                                         | um03242   | 0.26685 | ni     | hypothetical protein                                                                      |
| 16d00031 | 0.36132 | K01920 | glutathione synthetase                                          | um06466   | 0.267   | ni     | related to amidase                                                                        |
| 10c00040 | 0.36141 | ni     | hypothetical protein                                            | um11818   | 0.26749 | ni     | probable SDS22 - protein phosphatase 1                                                    |
| 12c00131 | 0.36141 | ni     | protein Me2                                                     | um10812   | 0.26751 | ni     | conserved hypothetical protein                                                            |
| 24c00032 | 0.36144 | ni     | DNA helicase, TBP-interacting protein                           | um11341   | 0.26765 | K13119 | related to ALG12 - alpha-1                                                                |
| 7d00104  | 0.36148 | K07560 | D-Tyr-tRNA (Tyr) deacylase                                      | um11964   | 0.26768 | K11426 | conserved hypothetical protein                                                            |
| 18c00048 | 0.36171 | K15544 | protein involved in transcription start site selection          | um02033   | 0.26774 | ni     | putative protein                                                                          |
| 9d00306  | 0.36174 | K0361  | 26S proteasome regulatory complex                               | um02960   | 0.26775 | K03456 | probable ser                                                                              |
| 9c00237  | 0.36185 | ni     | hypothetical protein                                            | um02147   | 0.26784 | ni     | related to cytosolic acetyl-CoA hydrolase 1                                               |
| 24d00017 | 0.3619  | ni     | triglyceride lipase-cholesterol esterase                        | um03937   | 0.268   | K14457 | probable diacylglycerol acyltransferase type 2b                                           |
| 6d00127  | 0.36195 | ni     | uncharacterized conserved protein                               | um05424   | 0.26811 | ni     | conserved hypothetical protein                                                            |
| 9c00028  | 0.36196 | K09528 | predicted molecular chaperone                                   | um03476   | 0.26813 | ni     | conserved hypothetical protein                                                            |
| 20c00036 | 0.36203 | ni     | hypothetical protein                                            | um10015   | 0.26815 | ni     | conserved hypothetical protein                                                            |
| 25c00088 | 0.3621  | K09955 | hypothetical protein                                            | um12269.2 | 0.2682  | ni     | related to CYB2 - lactate dehydrogenase cytochrome b2                                     |
| 16c00016 | 0.36221 | K12586 | exosomal 3'-5' exonuclease complex, subunit Rrp43               | um12052   | 0.26833 | ni     | b mating type locus                                                                       |
| 7c00023  | 0.36222 | ni     | hypothetical protein                                            | um04889   | 0.26843 | ni     | related to beta-1                                                                         |
| 3c00053  | 0.36228 | K00599 | carboxymethyl transferase                                       | um10304   | 0.26855 | ni     | putative protein                                                                          |
| 8d00023  | 0.3624  | K14855 | notchless-like WD40 repeat-containing protein                   | um11176   | 0.26861 | ni     | conserved hypothetical protein                                                            |
| 11d00088 | 0.36245 | ni     | hypothetical protein                                            | um10465.2 | 0.26897 | K00921 | probable FAF1 - phosphatidylinositol 3-phosphate 5-kinase                                 |
| 22c00227 | 0.3625  | K01113 | hypothetical protein                                            | um05214   | 0.26914 | ni     | conserved hypothetical Ustilago-specific protein                                          |
| 27c00077 | 0.3626  | ni     | hypothetical protein                                            | um10368   | 0.26961 | K09419 | related to Heat shock factor protein                                                      |
| 15c00058 | 0.36261 | K09265 | MADS box transcription factor                                   | um03696   | 0.26969 | K04706 | related to SIZ1 - E3-like factor in the SUMO pathway                                      |
| 9c00200  | 0.36264 | K02309 | protein kinase essential for the initiation of DNA replication  | um00582   | 0.26978 | ni     | related to cytoskeleton assembly control protein                                          |
| 9d00128  | 0.36276 | ni     | hypothetical protein                                            | um15030   | 0.26994 | K14715 | conserved hypothetical protein                                                            |
| 14d00063 | 0.36282 | ni     | hypothetical protein                                            | um06466   | 0.27003 | ni     | conserved hypothetical protein                                                            |
| 20c00022 | 0.36284 | ni     | NADP-dependent isocitrate dehydrogenase                         | um03698   | 0.27007 | ni     | conserved hypothetical protein                                                            |
| 9c00398  | 0.36289 | ni     | hypothetical protein                                            | um10355   | 0.27031 | K11876 | conserved hypothetical protein                                                            |
| 15c00040 | 0.363   | ni     | hypothetical protein                                            | um10482   | 0.27048 | K03123 | probable transcription initiation factor Iia gamma chain                                  |
| 5d00017  | 0.36309 | ni     | hypothetical protein                                            | um04166   | 0.27051 | ni     | related to SHG9 - mitochondrial inner membrane protein                                    |
| 27d00083 | 0.36308 | ni     | hypothetical protein                                            | um02888   | 0.27055 | ni     | related to ADH6 - NADPH-dependent alcohol dehydrogenase                                   |
| 20c0019  | 0.36319 | ni     | hypothetical protein                                            | um10418   | 0.27057 | ni     | hypothetical protein                                                                      |
| 9d00194  | 0.3633  | ni     | hypothetical protein                                            | um03628   | 0.27067 | ni     | related to molybdenum cofactor sulfurase HxB protein                                      |
| 5c00089  | 0.3634  | ni     | predicted E3 ubiquitin ligase                                   | um00126   | 0.27067 | ni     | related to Chlin deacetylase 1                                                            |
| 5c00140  | 0.36341 | K02604 | predicted Zn-finger protein                                     | um15042   | 0.27069 | K12763 | related to ascospore maturation 1 protein                                                 |
| 18d00069 | 0.36343 | K12846 | nucleic acid binding protein                                    | um06204   | 0.27076 | ni     | ni                                                                                        |
| 9c00426  | 0.36345 | ni     | hypothetical protein                                            | um04713   | 0.27096 | K15326 | conserved hypothetical protein                                                            |
| 9d00027  | 0.36345 | K15710 | helicase-like transcription factor HLTf                         | um12248   | 0.27106 | ni     | hypothetical protein                                                                      |
| 9c00108  | 0.36351 | ni     | hypothetical protein                                            | um10964   | 0.27115 | ni     | conserved hypothetical protein                                                            |
| 22c00082 | 0.36367 | ni     | hypothetical protein                                            | um10274   | 0.27122 | ni     | putative protein                                                                          |
| 7d00263  |         |        |                                                                 |           |         |        |                                                                                           |

|          |         |        |                                                                      |           |         |        |                                                                                             |
|----------|---------|--------|----------------------------------------------------------------------|-----------|---------|--------|---------------------------------------------------------------------------------------------|
| 9c00422  | 0.36562 | ni     | hypothetical protein                                                 | um10915   | 0.27401 | K12813 | probable PRP2 - RNA-dependent ATPase of DEAH box family                                     |
| 22d00038 | 0.36601 | K12733 | cyclophilin type peptidyl-prolyl cis-trans isomerase                 | um05178   | 0.27411 | ni     | conserved hypothetical protein                                                              |
| 14c00096 | 0.36629 | K00943 | thymidylate kinase/adenylate kinase                                  | um04841   | 0.2742  | ni     | conserved hypothetical protein                                                              |
| 7d00194  | 0.36633 | ni     | hypothetical protein                                                 | um11201.2 | 0.27477 | ni     | putative protein                                                                            |
| 22c00083 | 0.36638 | K06662 | checkpoint RAD17-RFC complex, RAD17/RAD24 component                  | um06350   | 0.27479 | K01181 | probable endo-                                                                              |
| 11c00200 | 0.36638 | K02152 | vacuolar H <sup>+</sup> -ATPase V1 sector, subunit G                 | um10357   | 0.27495 | ni     | probable BAT1- branched chain amino acid aminotransferase                                   |
| 2c000065 | 0.36648 | ni     | hypothetical protein                                                 | um00390   | 0.27533 | K00416 | related to CCR6 - ubiquitin-cytochrome-c reductase 17K protein                              |
| 22c00007 | 0.36653 | ni     | hypothetical protein                                                 | um11156   | 0.27535 | ni     | hypothetical protein                                                                        |
| 19c00071 | 0.36656 | ni     | FOG, RRM domain                                                      | um00657   | 0.27548 | K15082 | related to RAD7 - nucleotide excision repair protein                                        |
| 4c00021  | 0.36661 | ni     | hypothetical protein                                                 | um10153   | 0.27561 | K03029 | probable 26S proteasome regulatory subunit Rpn10                                            |
| 22c00114 | 0.36667 | K15436 | nuclear transport regulator                                          | um004959  | 0.27563 | ni     | related to BCH1 - Protein involved in transport at the trans-Golgi                          |
| 22c00233 | 0.36687 | ni     | hypothetical protein                                                 | 0.27600   | K03021  | ni     | probable DNA-directed RNA polymerase III                                                    |
| 10c00087 | 0.36691 | ni     | hypothetical protein                                                 | um03058   | 0.27643 | K03023 | conserved hypothetical protein                                                              |
| 2c00006  | 0.36695 | ni     | predicted transporter                                                | um01126   | 0.2765  | ni     | probable MRPL38 - mitochondrial ribosomal protein                                           |
| 6d00077  | 0.36708 | ni     | TNF receptor-associated factor                                       | um06060   | 0.27663 | ni     | putative protein                                                                            |
| 11d00074 | 0.36714 | ni     | hypothetical protein                                                 | um11498   | 0.27675 | K02930 | probable RPL4A - ribosomal protein L4-A                                                     |
| 14c00091 | 0.36719 | K07203 | DNA-dependent protein kinase                                         | um00450   | 0.27681 | ni     | related to multidrug resistance protein                                                     |
| 26d00074 | 0.36724 | ni     | hypothetical protein                                                 | um02551   | 0.27686 | ni     | putative protein                                                                            |
| 7d00133  | 0.36725 | K00387 | sulfite oxidase, heme-binding component                              | um10293.2 | 0.2769  | K01103 | probable FBP26 - fructose-2                                                                 |
| 19d00136 | 0.36729 | ni     | hypothetical protein                                                 | um02458   | 0.277   | ni     | hypothetical protein                                                                        |
| 12c00086 | 0.36737 | K04627 | hypothetical protein                                                 | um12135   | 0.27702 | ni     | related to MRE2 - required for maintenance in ploidy                                        |
| 7d00212  | 0.36747 | ni     | predicted L-carnitine dehydratase                                    | um04213   | 0.27715 | ni     | putative protein                                                                            |
| 26c00018 | 0.36759 | ni     | hypothetical protein                                                 | um05136   | 0.27716 | ni     | conserved hypothetical protein                                                              |
| 24c00033 | 0.3676  | K04499 | DNA helicase, TBP-interacting protein                                | um05842   | 0.27719 | ni     | Myp1 protein                                                                                |
| 7d00189  | 0.36798 | ni     | predicted Rho GTPase-activating protein                              | um01212   | 0.2773  | ni     | putative protein                                                                            |
| 5c00076  | 0.36816 | K03113 | transcription initiation factor I                                    | um04908   | 0.27735 | ni     | related to serine                                                                           |
| 13d00080 | 0.36824 | ni     | sexual differentiation process protein ISP4                          | um01617   | 0.27756 | K14561 | probable IMP4 - component of the U3 small nuclear ribonucleoprotein                         |
| 7d00169  | 0.36832 | K13201 | FOG, RRM domain                                                      | um04947   | 0.27782 | ni     | putative protein                                                                            |
| 14d00074 | 0.36859 | ni     | hypothetical protein                                                 | um04451   | 0.27821 | ni     | conserved hypothetical protein                                                              |
| 7d00309  | 0.3686  | K03143 | RNA polymerase II transcription initiation/nucleotide excision rep   | um11531.2 | 0.27827 | ni     | related to RSM427 - mitochondrial ribosomal protein                                         |
| 20c00014 | 0.36892 | ni     | hypothetical protein                                                 | um04903   | 0.2783  | K03495 | related to MTO1 protein involved in mitochondrial rRNA modification                         |
| 22c00281 | 0.36888 | ni     | hypothetical protein                                                 | um02127   | 0.2784  | ni     | hypothetical protein                                                                        |
| 25d00089 | 0.36904 | ni     | synaptic vesicle transporter SVOP and related transporters           | um05254   | 0.27868 | ni     | hypothetical protein                                                                        |
| 14d00030 | 0.36916 | K02896 | 60S ribosomal protein L10                                            | um03276   | 0.27883 | ni     | related to SRP40 - serine-rich protein with a role in pre-ribosome assembly or transport    |
| 27d00014 | 0.36934 | K10276 | leucine rich repeat proteins                                         | um11016   | 0.27897 | K02830 | exonuclease REC1                                                                            |
| 7d00036  | 0.36944 | ni     | predicted 3'-5' exonuclease                                          | um11168   | 0.27924 | ni     | probable TIM8 - Translocase of the mitochondrial inner Membrane                             |
| 19c00137 | 0.3695  | K14402 | mRNA cleavage and polyadenylation factor II complex, subunit C1      | um02034   | 0.27943 | ni     | conserved hypothetical protein                                                              |
| 14d00078 | 0.36975 | ni     | hypothetical protein                                                 | um02601   | 0.27991 | ni     | hypothetical protein                                                                        |
| 12d00113 | 0.36979 | ni     | hypothetical protein                                                 | um01514   | 0.27994 | ni     | probable DL2 - D-lactate dehydrogenase                                                      |
| 19c00126 | 0.36981 | ni     | hypothetical protein                                                 | um04441   | 0.28015 | K10251 | related to 17-beta-hydroxysteroid dehydrogenase                                             |
| 12d00047 | 0.36993 | ni     | hypothetical protein                                                 | um11673   | 0.28027 | K05527 | conserved hypothetical protein                                                              |
| 6c00103  | 0.36994 | ni     | phosphotyrosyl phosphatase activator                                 | um01883   | 0.28034 | ni     | conserved hypothetical protein                                                              |
| 7d00299  | 0.36996 | ni     | ras GTPase-activating protein family - ICGAP                         | um04050   | 0.28049 | K01951 | probable GUA1 - GMP synthase                                                                |
| 12d00100 | 0.37003 | K02927 | leucine rich repeat protein L40 fusion                               | um05340   | 0.28062 | ni     | related to Oestrin F                                                                        |
| 18c00015 | 0.37024 | ni     | hypothetical protein                                                 | um06445   | 0.28078 | ni     | conserved hypothetical protein                                                              |
| 10d00091 | 0.37028 | ni     | hypothetical protein                                                 | um04920   | 0.28101 | ni     | putative protein                                                                            |
| 26d00007 | 0.37028 | ni     | FOG, Zn-finger                                                       | um04447   | 0.28106 | ni     | conserved hypothetical protein                                                              |
| 26d00070 | 0.37048 | K10839 | nucleotide excision repair factor NEF2, RAD23 component              | um01341   | 0.2812  | K06185 | probable iron inhibited ABC transporter 2                                                   |
| 26c00090 | 0.37056 | ni     | hypothetical protein                                                 | um10929   | 0.28142 | ni     | conserved hypothetical protein                                                              |
| 11d00085 | 0.37058 | K08150 | predicted transporter                                                | um03831   | 0.28143 | ni     | conserved hypothetical protein                                                              |
| 18d00107 | 0.37066 | ni     | hypothetical protein                                                 | um00716.2 | 0.28147 | K14789 | related to NOP6 - protein with possible role in rRNA processing                             |
| 26c00097 | 0.37069 | K15100 | mitochondrial tricarboxylate/dicarboxylate carrier proteins          | um00572   | 0.28148 | K14016 | related to UFD1 - ubiquitin fusion degradation protein                                      |
| 22d00035 | 0.37073 | ni     | hypothetical protein                                                 | um01340   | 0.28151 | K14847 | related to RNF2 - protein RPF2 involved in ribosomal large subunit assembly and maintenance |
| 15d00021 | 0.37088 | ni     | synaptic vesicle transporter SVOP and related transporters           | um12276   | 0.28148 | ni     | putative protein                                                                            |
| 25c00069 | 0.3709  | K10885 | DNA-binding subunit of a DNA-dependent protein kinase                | um04739   | 0.28154 | ni     | conserved hypothetical protein                                                              |
| 9c00407  | 0.37115 | K11665 | SNF2 family DNA-dependent ATPase                                     | um11421   | 0.28155 | K00140 | probable methylmalonate-semialdehyde dehydrogenase                                          |
| 26c00096 | 0.37135 | ni     | hypothetical protein                                                 | um10264   | 0.28171 | ni     | hypothetical protein                                                                        |
| 19c00051 | 0.37143 | K12617 | uncharacterized conserved protein                                    | um03923   | 0.28188 | K00287 | conserved hypothetical protein                                                              |
| 6d00092  | 0.37157 | ni     | integral membrane protease of the rhomboid family                    | um02855   | 0.28229 | K14300 | conserved hypothetical protein                                                              |
| 9c00294  | 0.3716  | K03512 | DNA polymerase IV                                                    | um10764   | 0.28229 | ni     | related to TR4 orphan receptor associated protein TRA16                                     |
| 25c00001 | 0.37161 | ni     | hypothetical protein                                                 | um03080   | 0.28243 | K06269 | probable serine                                                                             |
| 16c00077 | 0.37193 | ni     | hypothetical protein                                                 | um02426   | 0.28246 | K14411 | related to MRE11 - subunit of cleavage factor I                                             |
| 26d00093 | 0.37182 | K10865 | DNA repair exonuclease MRE11                                         | um00650   | 0.28263 | ni     | related to Progesterone 5-beta-reductase                                                    |
| 18d00039 | 0.37201 | ni     | histone deacetylase complex, catalytic component RPD3                | um04745   | 0.28263 | ni     | conserved hypothetical protein                                                              |
| 8c00004  | 0.37204 | ni     | hypothetical protein                                                 | um05898.2 | 0.28282 | K13989 | conserved hypothetical protein                                                              |
| 12d00027 | 0.37206 | ni     | beta-tubulin folding cofactor E                                      | um02521   | 0.28285 | ni     | conserved hypothetical protein                                                              |
| 5c00075  | 0.37217 | K10863 | hypothetical protein                                                 | um00700   | 0.28289 | ni     | related to Zinc-binding oxidoreductase                                                      |
| 3c00040  | 0.3722  | ni     | hypothetical protein                                                 | um04572   | 0.28292 | ni     | conserved hypothetical protein                                                              |
| 22d00148 | 0.37221 | ni     | hypothetical protein                                                 | um10285   | 0.28294 | ni     | conserved hypothetical protein                                                              |
| 14d00049 | 0.37236 | ni     | hypothetical protein                                                 | um03952   | 0.28312 | K03248 | related to TIF35 - translation initiation factor eIF3 subunit                               |
| 18d00029 | 0.37255 | K09184 | hypothetical protein                                                 | um03952   | 0.28312 | K01113 | conserved hypothetical protein                                                              |
| 14c00075 | 0.37263 | ni     | hypothetical protein                                                 | um04570   | 0.28329 | ni     | hypothetical protein                                                                        |
| 5c00142  | 0.37272 | ni     | hypothetical protein                                                 | um01869   | 0.28352 | K00540 | related to NADH oxidase                                                                     |
| 19d00033 | 0.37277 | ni     | hypothetical protein                                                 | um11157   | 0.28353 | ni     | conserved hypothetical protein                                                              |
| 16d00033 | 0.37279 | ni     | 3'-phosphoadenosine 5'-phosphosulfate sulfotransferase               | um04994   | 0.28356 | K12670 | related to VBP1 - oligosaccharyl transferase beta subunit precursor                         |
| 9c00110  | 0.3728  | ni     | hypothetical protein                                                 | um01125   | 0.28361 | ni     | hypothetical protein                                                                        |
| 12c00127 | 0.37293 | ni     | hypothetical protein                                                 | um04085   | 0.2837  | ni     | conserved hypothetical Ustilago-specific protein                                            |
| 10c0002  | 0.37295 | ni     | hypothetical protein                                                 | um06365.2 | 0.28385 | ni     | conserved hypothetical protein                                                              |
| 5d00117  | 0.3733  | ni     | hypothetical protein                                                 | um00602   | 0.28385 | K14848 | related to RRB1 - involved in the regulation of ribosome biosynthesis                       |
| 18c00078 | 0.37354 | K01649 | hypothetical protein                                                 | um02050   | 0.28407 | ni     | related to NUP133 - nucleoporin                                                             |
| 14c00068 | 0.37348 | ni     | hypothetical protein                                                 | um05126   | 0.28408 | K15334 | related to NCL1 - rRNA                                                                      |
| 7d00300  | 0.37356 | ni     | stress-activated MAP kinase-interacting protein                      | um02168.2 | 0.28415 | K08856 | related to Prk1p                                                                            |
| 19c00136 | 0.37364 | ni     | MD40 protein DMR-N9                                                  | um10265   | 0.28435 | ni     | conserved hypothetical protein                                                              |
| 22d00026 | 0.37373 | ni     | hypothetical protein                                                 | um01008   | 0.28443 | K02234 | probable POL2 - DNA polymerase epsilon                                                      |
| 4c00019  | 0.37378 | ni     | voltage-gated shaker-like K <sup>+</sup> channel, subunit beta/KCNAB | um03373   | 0.28447 | K08793 | related to serine                                                                           |
| 7d00203  | 0.37382 | ni     | hypothetical protein                                                 | um03167   | 0.2845  | ni     | related to endothelial zinc finger protein induced by tumor necrosis factor alpha           |
| 19d00084 | 0.37385 | K14721 | hypothetical protein                                                 | um01651   | 0.28462 | K07904 | probable GTP-binding protein Rab11                                                          |
| 16d00044 | 0.3741  | ni     | mitochondrial polypeptide chain release factor                       | um03153   | 0.28464 | K12608 | related to ATP-binding cassette                                                             |
| 9c00001  | 0.37439 | K08176 | hypothetical protein                                                 | um02019   | 0.28468 | K01452 | probable Chain disacetylase                                                                 |
| 25d00059 | 0.37448 | K02677 | serine/threonine protein kinase                                      | um02289   | 0.28468 | ni     | conserved hypothetical protein                                                              |
| 18c00059 | 0.37458 | ni     | hypothetical protein                                                 | um04610   | 0.28468 | K15174 | related to DNA-directed RNA polymerase II regulator                                         |
| 6c00135  | 0.3747  | K06210 | nicotinamide mononucleotide adenyllyl transferase                    | um04351   | 0.28483 | ni     | probable SEC7 - component of non-clathrin vesicle coat                                      |
| 7d00272  | 0.37476 | ni     | uncharacterized conserved protein                                    | um02549   | 0.28482 | ni     | b-induced zinc finger protein                                                               |
| 20c00042 | 0.37485 | ni     | hypothetical protein                                                 | um04361   | 0.28502 | K14786 | related to KR1 - KR1-interacting protein 1                                                  |
| 25c00050 | 0.37502 | ni     | hypothetical protein                                                 | um05883   | 0.28505 | K07565 | probable NIP7 - required for efficient 60S ribosome subunit biogenesis                      |
| 7d00033  | 0.37508 | ni     | hypothetical protein                                                 | um05263   | 0.28511 | ni     | putative protein                                                                            |
| 15d00082 | 0.37534 | ni     | hypothetical protein                                                 | um05926   | 0.28523 | ni     | conserved hypothetical Ustilago-specific protein                                            |
| 15d00043 | 0.37537 | K01426 | dual specificity, serine/threonine and tyrosine kinase               | um06366   | 0.28526 | ni     | putative protein                                                                            |
| 12d00020 | 0.37542 | ni     | glyoxylate/hydroxyypyruvate reductase                                | um10707   | 0.28564 | ni     | putative protein                                                                            |
| 5c00024  | 0.37542 | ni     | hypothetical protein                                                 | um03635   | 0.2858  | ni     | conserved hypothetical Ustilago-specific protein                                            |
| 26d00077 | 0.37555 | ni     | uncharacterized conserved protein                                    | um03743.2 | 0.2858  | ni     | related to ARP6 - Actin-related protein                                                     |
| 12d00041 | 0.37559 | ni     | hypothetical protein                                                 | um02546   | 0.28588 | K12275 | related to translocation protein sec22                                                      |
| 15d00009 | 0.37561 | ni     | hypothetical protein                                                 | um05124   | 0.28589 | ni     | hypothetical protein                                                                        |
| 9c00394  | 0.37562 | K10755 | replication factor C, subunit RFC2                                   | um10373   | 0.28593 | K00794 | probable RIB4 - 6                                                                           |
| 9d00275  | 0.37599 | ni     | hypothetical protein                                                 | um02190.2 | 0.28594 | ni     | putative protein                                                                            |
| 9c00310  | 0.37621 | ni     | hypothetical protein                                                 | um00269   | 0.28603 | K14394 | probable LTP1 - protein-tyrosine-phosphatase                                                |
| 8c00128  | 0.37622 | K00480 | hypothetical protein                                                 | um00740   | 0.28616 | K00277 | related to 2-dehydrogenate 2-reductase                                                      |
| 15d00081 | 0.37627 | ni     | hypothetical protein                                                 | um01059   | 0.28618 | K15113 | probable MRS4 - Protein of the mitochondrial carrier family                                 |
| 24d00059 | 0.37629 | K07152 | putative cytochrome C oxidase assembly protein                       | um00757   | 0.28632 | ni     | conserved hypothetical protein                                                              |
| 6c00028  | 0.37641 | ni     | hypothetical protein                                                 | um01698   | 0.28648 | ni     | putative protein                                                                            |
| 5c00022  | 0.37662 | ni     | alcohol dehydrogenase                                                | um11249   | 0.28649 | K00574 | related to cyclopropane-fatty-acyl-phospholipid synthase                                    |
| 9c00245  | 0.37684 | K03937 | NAD <sup>+</sup> -dependent oxidoreductase, NDUFS4/18 kDa subunit    | um01758.2 | 0.28651 | K14285 | related to R2 - mRNA export protein                                                         |
| 9c00189  | 0.37672 | ni     | serine/threonine protein kinase                                      | um05754   | 0.28665 | K03522 | probable electron transfer flavoprotein alpha chain precursor                               |
| 18c00009 | 0.37686 | ni     | multiple inositol polyphosphate phosphatase                          | um00239   | 0.28677 | K11233 | related to SSK1 - two-component signal transducer                                           |
| 9c00374  | 0.37697 | ni     | NADH-cytochrome b-5 reductase                                        | um11412   | 0.28694 | K02921 | probable RPL43B - 60S large subunit ribosomal protein                                       |
| 8d00057  | 0.377   | ni     | hypothetical protein                                                 | um11548   | 0.28705 | ni     | conserved hypothetical protein                                                              |
| 2c000066 | 0.37714 | ni     | hypothetical protein                                                 | um12320   | 0.28709 | ni     | conserved hypothetical Ustilago-specific protein                                            |
| 11d00030 | 0.37741 | K03979 | predicted GTP-binding protein                                        | um00119   | 0.28715 | ni     | related to protein FR                                                                       |
| 7d00132  | 0.37746 | K14396 | splicing factor RNP51                                                | um11195   | 0.28716 | ni     | related to serine                                                                           |
| 27c00063 | 0.37754 | K00297 | 5,10-methyleneisrahydrofolate reductase                              | um05466   | 0.28719 | ni     | putative protein                                                                            |
| 5c00116  | 0.37765 | ni     | hypothetical protein                                                 | um01196   | 0.28725 | ni     | conserved hypothetical protein                                                              |
| 18c00051 | 0.37788 | ni     | hypothetical protein                                                 | um00249   | 0.28726 | ni     | conserved hypothetical protein                                                              |
| 7d00181  | 0.37795 | ni     | hypothetical protein                                                 | um10768   | 0.28726 | ni     | conserved hypothetical protein                                                              |
| 9c00391  | 0.37798 | K02979 | 40S ribosomal protein S28                                            | um10754   | 0.28753 | K02135 | related to alp synthase epsilon chain                                                       |
| 10c00081 | 0.37807 | K05747 | actin regulatory protein                                             | um00403   | 0.28762 | K00026 | probable MDH1 - malate dehydrogenase precursor                                              |
| 9c00272  | 0.37808 | ni     | hypothetical protein                                                 | um03419   | 0.28765 | ni     | putative protein                                                                            |
| 22c00058 | 0.37813 | ni     | predicted membrane protein                                           | um11050   | 0.28792 | K06682 | Ras-GTPase                                                                                  |
| 8d00005  | 0.37818 | ni     | RAB proteins geranyl-3-phosphatase component A                       | um11632   | 0.28793 | K01267 | related to bacterial glycerol-3-phosphate acyltransferases                                  |
| 9c00170  | 0.37839 | ni     | hypothetical protein                                                 | um05029   | 0.28813 | K11768 | related to macro nuclear actin 1                                                            |
| 14d00003 | 0.37844 | ni     | hypothetical protein                                                 | um03816   | 0.28821 | K11253 | probable HHT1 - histone H3                                                                  |
| 9c00004  | 0.37893 | ni     | hypothetical protein                                                 | um12272   | 0.28822 | K04409 | Ste20-like protein kinase                                                                   |
| 7d00030  | 0.37902 | K14292 | methylase                                                            | um03070   | 0.28828 | K14399 | related to Pre-mRNA cleavage complex II protein Ctp1                                        |
| 5c00011  | 0.37911 | ni     | hypothetical protein                                                 | um05854   | 0.2884  | K11397 | conserved hypothetical protein                                                              |
| 5c00118  | 0.37923 | ni     | hypothetical protein                                                 | um03223   | 0.28841 | ni     | probable DUR3 - Urea permease                                                               |
| 14d00065 | 0.3     |        |                                                                      |           |         |        |                                                                                             |

|          |         |        |                                                                      |           |         |        |                                                                                            |
|----------|---------|--------|----------------------------------------------------------------------|-----------|---------|--------|--------------------------------------------------------------------------------------------|
| 25c0040  | 0.38137 | K11390 | hypothetical protein                                                 | um02713   | 0.29041 | ni     | pheromone response factor Prf1                                                             |
| 19d00155 | 0.38145 | K01341 | ubiquitin-like proprotein convertase                                 | um05045   | 0.29057 | K16196 | related to GGN2 - ser                                                                      |
| 9d00273  | 0.38148 | K01191 | alpha-mannosidase                                                    | um01987   | 0.29072 | ni     | hypothetical protein                                                                       |
| 7c00207  | 0.38151 | ni     | hypothetical protein                                                 | um02886   | 0.29086 | ni     | conserved hypothetical Ustilago-specific protein                                           |
| 12c00031 | 0.38167 | K06630 | multifunctional chaperone                                            | um00734   | 0.29101 | ni     | conserved hypothetical protein                                                             |
| 26c00060 | 0.38167 | ni     | dolichol kinase                                                      | um00936   | 0.29105 | K04348 | calcineurin catalytic subunit                                                              |
| 11c00076 | 0.38173 | ni     | hypothetical protein                                                 | um04342   | 0.29111 | ni     | putative protein                                                                           |
| 11c00205 | 0.38176 | ni     | hypothetical protein                                                 | um02177.2 | 0.29115 | ni     | related to DRAP deaminase RIB2                                                             |
| 20c00051 | 0.38177 | K03122 | RNA polymerase II transcription initiation factor TFIIE, large chain | um01056   | 0.29133 | K09580 | probable protein disulfate isomerase                                                       |
| 26c00078 | 0.38177 | K07179 | serine/threonine protein kinase                                      | um03584   | 0.29146 | K03005 | related to RPA49 - 49 kD subunit of DNA-directed RNA polymerase I                          |
| 18d00109 | 0.38218 | ni     | hypothetical protein                                                 | um04689   | 0.29216 | ni     | conserved hypothetical Ustilago-specific protein                                           |
| 5c00148  | 0.38221 | K11372 | cell cycle-related histone H1-binding protein                        | um05225   | 0.29177 | K03965 | conserved hypothetical protein                                                             |
| 25d00088 | 0.38226 | ni     | predicted transporter                                                | um12225   | 0.29177 | ni     | putative protein                                                                           |
| 12c00009 | 0.38241 | ni     | rasgap SH3 binding protein rasputin                                  | um11208   | 0.29183 | K07973 | putative protein                                                                           |
| 8d00046  | 0.38249 | ni     | predicted DEAD-box-containing helicase                               | um11234.2 | 0.29195 | ni     | conserved hypothetical protein                                                             |
| 22d01528 | 0.38252 | K01417 | jacalin-like lectin domain-containing protein                        | um03388   | 0.29202 | ni     | hypothetical protein                                                                       |
| 7c000171 | 0.38254 | ni     | hypothetical protein                                                 | um05052   | 0.29213 | ni     | hypothetical protein                                                                       |
| 7c00253  | 0.38269 | K00602 | ALCAR transformylase                                                 | um03791   | 0.29223 | K03283 | heat shock 70 kd protein 2                                                                 |
| 22d00227 | 0.38281 | ni     | hypothetical protein                                                 | um05700   | 0.29263 | ni     | conserved hypothetical protein                                                             |
| 20d00004 | 0.38282 | ni     | hypothetical protein                                                 | um10138   | 0.29283 | ni     | conserved hypothetical protein                                                             |
| 9c000349 | 0.38285 | ni     | arylsulfatase deacetylase                                            | um05342   | 0.29287 | ni     | hypothetical protein                                                                       |
| 1c000011 | 0.38306 | ni     | predicted transporter                                                | um05392   | 0.29293 | ni     | conserved hypothetical protein                                                             |
| 7d00131  | 0.3833  | ni     | serine/threonine protein kinase                                      | um10503   | 0.29298 | K16944 | probable cell division control protein CDC3                                                |
| 11d00043 | 0.38332 | ni     | hypothetical protein                                                 | um05301   | 0.29298 | ni     | conserved hypothetical Ustilago-specific protein                                           |
| 5d00032  | 0.3834  | ni     | hypothetical protein                                                 | um02039   | 0.29302 | ni     | conserved hypothetical protein                                                             |
| 5c00157  | 0.38347 | K12765 | MAPK related serine/threonine protein kinase                         | um03907   | 0.29305 | ni     | conserved hypothetical protein                                                             |
| 14d00092 | 0.38356 | K00559 | SAM-dependent methyltransferase                                      | um10258   | 0.29326 | ni     | hypothetical protein                                                                       |
| 14c00117 | 0.38365 | ni     | class 2 transcription repressor NC2, beta subunit                    | um05954   | 0.29337 | K15283 | related to SLV41 - Putative transporter of the triose phosphate translocator family        |
| 22c00195 | 0.38371 | ni     | hypothetical protein                                                 | um02224   | 0.29337 | ni     | conserved hypothetical protein                                                             |
| 7c00206  | 0.38377 | K03038 | 26S proteasome regulatory complex, subunit RPN8/PSMD7                | um01520   | 0.2934  | ni     | related to Na                                                                              |
| 27d00025 | 0.38383 | ni     | uncharacterized conserved protein                                    | um11868   | 0.2934  | ni     | related to S5                                                                              |
| 20d00048 | 0.38394 | K00641 | hypothetical protein                                                 | um11447.2 | 0.2935  | K17257 | conserved hypothetical protein                                                             |
| 7d00262  | 0.38403 | K13278 | asparaginase                                                         | um11254   | 0.29357 | ni     | conserved hypothetical protein                                                             |
| 20d0013  | 0.38412 | K01754 | threonine/serine dehydratases                                        | um04790   | 0.29365 | ni     | hypothetical protein                                                                       |
| 7c000231 | 0.38415 | ni     | glyoxylate decarboxylase                                             | um01528   | 0.29368 | ni     | conserved hypothetical protein                                                             |
| 20c00047 | 0.38419 | ni     | protein phosphatase 2A-associated protein                            | um12241   | 0.29374 | ni     | related to COX19 - Cytochrome c oxidase assembly protein                                   |
| 5c00089  | 0.38423 | ni     | hypothetical protein                                                 | um00904   | 0.29377 | K09486 | related to glucose regulated stress protein                                                |
| 25c00086 | 0.3843  | ni     | UDP-glucose 4-epimerase                                              | um10914   | 0.29381 | K11484 | related to HOS3 - Trichostatin A-insensitive homodimeric histone deacetylase               |
| 16d00030 | 0.38431 | K15280 | Kringle membrane protein                                             | um03983   | 0.29382 | ni     | related to WVD repeat and F/YE domain-containing protein 3                                 |
| 22d00265 | 0.38446 | ni     | dehydrogenases with different specificities                          | um10785   | 0.29402 | K03025 | related to RPO34 - DNA-directed RNA polymerase III                                         |
| 5d00009  | 0.38482 | ni     | hypothetical protein                                                 | um01174   | 0.29402 | K12811 | related to RNA helicase                                                                    |
| 7c00107  | 0.38483 | ni     | hypothetical protein                                                 | um02212   | 0.29445 | K01194 | related to trehalase precursor                                                             |
| 15c00067 | 0.38492 | ni     | hypothetical protein                                                 | um11915   | 0.29459 | ni     | putative protein                                                                           |
| 16c00027 | 0.38493 | ni     | hypothetical protein                                                 | um02002   | 0.29467 | K14808 | related to DBP10 - putative ATP-dependent RNA helicase involved in ribosome biogenesis     |
| 19c00086 | 0.38497 | K15147 | hypothetical protein                                                 | um02677   | 0.29505 | K11422 | related to regulatory protein SET1                                                         |
| 20c00027 | 0.38505 | K14311 | uncharacterized conserved protein                                    | um10848   | 0.29522 | K11560 | conserved hypothetical protein                                                             |
| 12c00143 | 0.38519 | ni     | hypothetical protein                                                 | um00617   | 0.29547 | K01409 | related to probable O-sialoglycoprotein endopeptidase                                      |
| 26d00091 | 0.38523 | ni     | hypothetical protein                                                 | um02552   | 0.29552 | ni     | related to WVD repeat and F/YE domain-containing protein 3                                 |
| 25d00003 | 0.38534 | ni     | uncharacterized conserved protein                                    | um02979   | 0.29554 | ni     | conserved hypothetical protein                                                             |
| 10c00094 | 0.38536 | ni     | hypothetical protein                                                 | um02437   | 0.29567 | K03950 | probable NADH2 dehydrogenase                                                               |
| 6c00057  | 0.38553 | ni     | hypothetical protein                                                 | um11114   | 0.29574 | ni     | conserved hypothetical protein                                                             |
| 19c00076 | 0.38557 | K00940 | nucleoside diphosphate kinase                                        | um11103   | 0.29576 | K02925 | probable RPL3 - 60s ribosomal protein l3                                                   |
| 9c000304 | 0.3856  | ni     | guanine nucleotide exchange factor                                   | um12238   | 0.29584 | ni     | putative protein                                                                           |
| 20c00042 | 0.38564 | K06062 | histone acetyltransferase SAGA/ADA, catalytic subunit PCAF/IG        | um02466   | 0.2959  | ni     | hypothetical protein                                                                       |
| 8d00033  | 0.38566 | ni     | hypothetical protein                                                 | um06443   | 0.29612 | K03264 | probable TIF6 - translation initiation factor 6                                            |
| 18d00098 | 0.38569 | ni     | hypothetical protein                                                 | um02849   | 0.29631 | K00942 | probable GUK1 - guanylate kinase                                                           |
| 7c00226  | 0.38574 | K03768 | peptidyl-prolyl cis-trans isomerase                                  | um01990   | 0.29648 | ni     | probable hypothetical protein                                                              |
| 8c00066  | 0.38576 | ni     | serine/threonine protein kinase                                      | um02962   | 0.29652 | ni     | hypothetical protein                                                                       |
| 20d0009  | 0.38577 | K15102 | mitochondrial phosphate carrier protein                              | um10164   | 0.29653 | K02959 | related to 30S ribosomal protein S16                                                       |
| 7d00162  | 0.38582 | ni     | hypothetical protein                                                 | um06296   | 0.29655 | K03144 | probable TFB2 - TFIIF subunit                                                              |
| 27d00021 | 0.38589 | ni     | membrane coat complex Retromer, subunit VPS5/SNX1                    | um12004   | 0.29674 | ni     | conserved hypothetical protein                                                             |
| 4d00037  | 0.38593 | ni     | hypothetical protein                                                 | um05122   | 0.29684 | ni     | conserved hypothetical protein                                                             |
| 13c00077 | 0.38623 | ni     | hypothetical protein                                                 | um11281   | 0.29687 | K12820 | probable PRP43 - involved in spliceosome disassembly                                       |
| 9d00404  | 0.3863  | ni     | hypothetical protein                                                 | um04035   | 0.29695 | ni     | conserved hypothetical Ustilago-specific protein                                           |
| 5c00109  | 0.38649 | ni     | hypothetical protein                                                 | um03653   | 0.29725 | ni     | conserved hypothetical protein                                                             |
| 13d00011 | 0.38656 | K14800 | hypothetical protein                                                 | um11474   | 0.2973  | K12183 | related to Tumor susceptibility gene 101 protein                                           |
| 24c0004  | 0.38667 | ni     | hypothetical protein                                                 | um02707   | 0.29736 | K17408 | conserved hypothetical protein                                                             |
| 9c00225  | 0.38671 | K00026 | NAD-dependent malate dehydrogenase                                   | um11036   | 0.29741 | K12862 | related to PRP46 - member of the splicing factor                                           |
| 11c00068 | 0.38677 | ni     | mitochondrial matrix protein frataxin                                | um05428   | 0.29783 | K02896 | related to RPL24 - Ribosomal Like Protein 24                                               |
| 10c00009 | 0.38713 | ni     | hypothetical protein                                                 | um10047   | 0.29841 | K14768 | conserved hypothetical protein                                                             |
| 14d00109 | 0.38714 | K03239 | transcription initiation factor 2B, alpha subunit                    | um01430   | 0.2986  | ni     | Dike                                                                                       |
| 19c00082 | 0.38721 | ni     | peroxisomal NUDIX hydrolase                                          | um10066   | 0.29861 | ni     | conserved hypothetical protein                                                             |
| 22d00229 | 0.38737 | ni     | hypothetical protein                                                 | um00305   | 0.29862 | K12825 | related to Splicing factor 3 subunit 1                                                     |
| 11c00007 | 0.38742 | K14803 | serine/threonine protein phosphatase                                 | um00094   | 0.29863 | K01423 | related to NonF protein                                                                    |
| 10c00002 | 0.38791 | K12182 | membrane trafficking and cell signaling protein HRS                  | um03092   | 0.29864 | ni     | putative protein                                                                           |
| 15c00016 | 0.38808 | ni     | uncharacterized conserved protein                                    | um02733.2 | 0.29897 | ni     | related to SMI1 - beta-1                                                                   |
| 15d00066 | 0.38809 | ni     | predicted haloacid-halohydratase and related hydrolases              | um03098   | 0.29933 | ni     | related to CNS1 - cyclophilin seven suppressor                                             |
| 8c00008  | 0.38833 | ni     | hypothetical protein                                                 | um01565   | 0.29943 | ni     | related to GPI transamidase component PIG-S                                                |
| 9c00418  | 0.38833 | K10581 | ubiquitin-conjugating enzyme                                         | um05848   | 0.29949 | ni     | related to galactoside O-acetyltransferase                                                 |
| 5d00051  | 0.38842 | ni     | leucin receptor generated protein                                    | um05215   | 0.29958 | ni     | hypothetical protein                                                                       |
| 8d00096  | 0.38899 | K01772 | prothrombin ferro-lyase                                              | um03906   | 0.29963 | ni     | hypothetical protein                                                                       |
| 15d00058 | 0.38918 | ni     | histone H3 (Lys9) methyltransferase SUV39H1/Ctr4                     | um12012   | 0.29968 | ni     | conserved hypothetical protein                                                             |
| 10c00059 | 0.38918 | ni     | hypothetical protein                                                 | um01669   | 0.29974 | K12196 | probable VPS4 - vacuolar sorting protein                                                   |
| 7d00024  | 0.38928 | ni     | hypothetical protein                                                 | um10526   | 0.29975 | ni     | probable SSB2 - heat shock protein of HSP70 family                                         |
| 5d00025  | 0.38979 | ni     | mitochondrial phytyl-CoA hydroxylase                                 | um01858   | 0.3     | ni     | conserved hypothetical protein                                                             |
| 10d00077 | 0.38981 | K01262 | xaa-pro aminopeptidase                                               | um05703   | 0.30004 | K00273 | related to D-amino-acid oxidase                                                            |
| 15c00046 | 0.38989 | ni     | rho GTPase-activating protein                                        | um02571   | 0.30009 | K09496 | probable CCT4 - component of chaperonin-containing T-complex                               |
| 6d00123  | 0.39008 | K05841 | UDP-glucuronosyl and UDP-glucosyl transferase                        | um12243   | 0.30009 | K11649 | related to sw                                                                              |
| 18d00048 | 0.39023 | ni     | hypothetical protein                                                 | um00494   | 0.30011 | ni     | conserved hypothetical protein                                                             |
| 1c00042  | 0.39028 | ni     | mitochondrial import inner membrane translocase, subunit TIM9        | um10405.2 | 0.30014 | K15076 | hypothetical protein                                                                       |
| 14d00056 | 0.39041 | K12397 | vesicle coat complex AP-3, beta subunit                              | um04793   | 0.30047 | ni     | conserved hypothetical protein                                                             |
| 22d00145 | 0.3905  | ni     | hypothetical protein                                                 | um02772   | 0.30056 | K02933 | related to MRPL6 - mitochondrial ribosomal protein                                         |
| 25d00070 | 0.39056 | K14005 | vesicle coat complex COP1I, subunit SEC31                            | um01149   | 0.30067 | ni     | glyoxal oxidase 3                                                                          |
| 22d00221 | 0.3906  | K09648 | mitochondrial inner membrane protease, subunit IMP2                  | um03122   | 0.30091 | ni     | hypothetical protein                                                                       |
| 25c00023 | 0.39066 | K14824 | WD40 repeat nuclear protein Bop1                                     | um04074   | 0.30095 | ni     | conserved hypothetical protein                                                             |
| 3d00039  | 0.39071 | K12819 | RNA splicing factor - Slu7p                                          | um12118   | 0.301   | ni     | putative protein                                                                           |
| 2d00072  | 0.39071 | ni     | hypothetical protein                                                 | um01226   | 0.30106 | ni     | hypothetical protein                                                                       |
| 9c00019  | 0.39079 | ni     | predicted membrane proteins                                          | um00598   | 0.30113 | ni     | conserved hypothetical protein                                                             |
| 16c00022 | 0.39079 | ni     | hypothetical protein                                                 | um10358   | 0.30132 | ni     | hypothetical protein                                                                       |
| 20c00039 | 0.39098 | K15264 | proliferation-associated nuclear protein                             | um11396   | 0.30136 | K08286 | related to ser                                                                             |
| 7d00230  | 0.39099 | ni     | predicted DHHC-type Zn-finger protein                                | um10139   | 0.30158 | K01918 | probable pantoate-beta-alanine ligase                                                      |
| 15c00088 | 0.39099 | ni     | hypothetical protein                                                 | um04988   | 0.30165 | ni     | conserved hypothetical protein                                                             |
| 9d00112  | 0.39103 | K09885 | aquaporin                                                            | um01386   | 0.30174 | ni     | hypothetical protein                                                                       |
| 18c00100 | 0.39107 | ni     | hypothetical protein                                                 | um11387   | 0.30182 | ni     | hypothetical protein                                                                       |
| 20c00001 | 0.39113 | ni     | hypothetical protein                                                 | um10372   | 0.3019  | ni     | related to MRPL3 - Mitochondrial ribosomal protein                                         |
| 22d00082 | 0.39115 | ni     | WD40 repeat protein                                                  | um00104   | 0.30218 | ni     | hypothetical protein                                                                       |
| 19d00106 | 0.39121 | ni     | hypothetical protein                                                 | um00725   | 0.30225 | K02331 | related to DNA polymerase V                                                                |
| 5d00123  | 0.39146 | K11303 | histone acetyltransferase type b catalytic subunit                   | um05207   | 0.3024  | K03506 | conserved hypothetical protein                                                             |
| 20d00005 | 0.3916  | ni     | hypothetical protein                                                 | um04767   | 0.30252 | K09549 | related to GIM4 - Gim complex component                                                    |
| 10c00022 | 0.39162 | ni     | hypothetical protein                                                 | um05870   | 0.30255 | ni     | related to ERV1 - mitochondrial biogenesis and regulation of cell cycle                    |
| 12c00066 | 0.39174 | K14571 | nuclear AAA ATPase                                                   | um01870   | 0.30255 | K00799 | related to glutathione-S-transferase                                                       |
| 9c000371 | 0.39183 | K15447 | uncharacterized conserved protein                                    | um01222   | 0.30278 | ni     | related to SAL1 - member of the Cas2-binding subfamily of the mitochondrial carrier family |
| 22c00168 | 0.39181 | ni     | predicted methyltransferase                                          | um05291   | 0.30279 | ni     | conserved hypothetical protein                                                             |
| 18d00058 | 0.39186 | ni     | hypothetical protein                                                 | um01027   | 0.30289 | K11761 | conserved hypothetical protein                                                             |
| 10d00057 | 0.39197 | ni     | hypothetical protein                                                 | um06416   | 0.30323 | ni     | conserved hypothetical protein                                                             |
| 18d00032 | 0.39197 | ni     | hypothetical protein                                                 | um01746   | 0.30329 | ni     | putative protein                                                                           |
| 3c00031  | 0.39203 | ni     | hypothetical protein                                                 | um05828   | 0.30329 | K07375 | probable tubulin beta chain                                                                |
| 7d00342  | 0.39212 | K09522 | zotuin and related molecular chaperones                              | um03498   | 0.30331 | ni     | related to CAF4 - CCR4 associated factor                                                   |
| 12d00024 | 0.39216 | K00670 | subunit of the major N alpha-acetyltransferase                       | um03467   | 0.30348 | K02992 | related to RSM7 - mitochondrial ribosomal protein                                          |
| 16c00071 | 0.39229 | K07443 | 6-O-methylguanine-DNA methyltransferase MGMT/MGT1                    | um02938   | 0.3036  | ni     | conserved hypothetical protein                                                             |
| 1c00012  | 0.39232 | ni     | hypothetical protein                                                 | um06386   | 0.3036  | K13095 | probable MSL5 - branch point bridging protein                                              |
| 12d00039 | 0.39248 | K05756 | actin-related protein Arp2/3 complex, subunit ARPC3                  | um04062   | 0.30369 | ni     | conserved hypothetical protein                                                             |
| 14c00013 | 0.39251 | ni     | hypothetical protein                                                 | um11222   | 0.30382 | ni     | related to MBP1 - transcription factor                                                     |
| 11c00045 | 0.39256 | ni     | hypothetical protein                                                 | um04223   | 0.30391 | ni     | probable glutaredoxin                                                                      |
| 2c00082  | 0.39257 | ni     | rab GTPase interacting factor                                        | um00101   | 0.30394 | K03509 | related to DNA polymerase eta                                                              |
| 22d00058 | 0.39265 | ni     | hypothetical protein                                                 | um03028   | 0.30397 | ni     | conserved hypothetical protein                                                             |
| 9c00003  | 0.39272 | ni     | nucleoside phosphatase                                               | um05991   | 0.30397 | K14376 | probable PAP1 - poly                                                                       |
| 9c000365 | 0.39274 | K12872 | predicted RNA-binding protein                                        | um02555   | 0.30397 | ni     | conserved hypothetical protein                                                             |
| 7d00259  | 0.39287 | ni     | uncharacterized conserved protein                                    | um04298   | 0.30399 | K14857 | probable SPB1 - required for ribosome synthesis                                            |
| 24c00069 | 0.39293 | ni     | hypothetical protein                                                 | um02936   | 0.30399 | ni     | putative protein                                                                           |
| 9c00037  | 0.39293 | K11567 | hypothetical protein                                                 | um03933   | 0.30411 | ni     | related to WWV1 - WW domain containing protein interacting with Metacaspase                |
| 22d00112 | 0.39295 | K01082 | salt-sensitive 3'-phosphoadenosine-5'-phosphatase HAL2/SAL1          | um00950   | 0.30418 | K16570 | related to GIM4 - Gim complex component                                                    |
| 13c00041 | 0.39298 | K03248 | transcription initiation factor 3, subunit g                         | um02187   | 0.30433 | ni     | conserved hypothetical protein                                                             |
| 9d00217  | 0.39312 | ni     | hypothetical protein                                                 | um05432.2 | 0.30469 | ni     | related to ATP-binding cassette                                                            |
| 14d00132 | 0.39328 | ni     | hypothetical protein                                                 | um11989   | 0.30506 | K14776 | probable HCA4 - can suppress the U14 snoRNA rRNA processing                                |

|          |         |        |                                                                   |           |         |        |                                                                                                    |
|----------|---------|--------|-------------------------------------------------------------------|-----------|---------|--------|----------------------------------------------------------------------------------------------------|
| 5400023  | 0.39524 | ni     | hypothetical protein                                              | um02739   | 0.30801 | ni     | probable nik-1 protein                                                                             |
| 26c00056 | 0.39542 | ni     | glutaryl-tRNA amidotransferase subunit B                          | um10169   | 0.30803 | ni     | conserved hypothetical Ustilago-specific protein                                                   |
| 11c00034 | 0.39558 | K10413 | dynlins, heavy chain                                              | um11806.2 | 0.30809 | ni     | conserved hypothetical protein                                                                     |
| 9a00341  | 0.39574 | K11801 | W-40 repeat-containing protein                                    | um05517   | 0.30815 | ni     | conserved hypothetical protein                                                                     |
| 15c00089 | 0.39594 | ni     | hypothetical protein                                              | um04430   | 0.30824 | K01070 | probable esterase D                                                                                |
| 16c00056 | 0.39595 | K15109 | mitochondrial carrier protein                                     | um00887   | 0.30841 | ni     | conserved hypothetical protein                                                                     |
| 8a00092  | 0.39606 | ni     | hypothetical protein                                              | um10054.2 | 0.30853 | ni     | hypothetical protein                                                                               |
| 5c00119  | 0.39644 | K11446 | DNA-binding protein jumonji/RBP2/SMCY                             | um03542   | 0.30866 | ni     | related to nucleoporin                                                                             |
| 4a00036  | 0.3966  | K07494 | hypothetical protein                                              | um11982   | 0.30905 | ni     | conserved hypothetical protein                                                                     |
| 6c00124  | 0.39674 | K01698 | delta-aminolevulinic acid dehydratase                             | um01892   | 0.30911 | K01637 | probable isocitrate lyase                                                                          |
| 14d00031 | 0.39699 | ni     | uncharacterized conserved protein                                 | um10591   | 0.30912 | K06867 | conserved hypothetical protein                                                                     |
| 7c000310 | 0.397   | K10756 | replication factor C, subunit RFC3                                | um15099   | 0.30913 | ni     | conserved hypothetical protein                                                                     |
| 9c00264  | 0.39725 | ni     | hypothetical protein                                              | um01415   | 0.30914 | ni     | conserved hypothetical protein                                                                     |
| 19d00061 | 0.39725 | ni     | peroxisomal membrane protein MPV17 and related proteins           | um11950   | 0.30917 | ni     | conserved hypothetical protein                                                                     |
| 10d00019 | 0.39733 | K11108 | RNA 3'-terminal phosphate cyclase                                 | um04258   | 0.30938 | ni     | ni                                                                                                 |
| 7c00120  | 0.39744 | ni     | beta-galactosidase                                                | um03992   | 0.30944 | ni     | Don3 interacting protein                                                                           |
| 12d00128 | 0.39761 | ni     | hypothetical protein                                              | um03542   | 0.30947 | ni     | conserved hypothetical protein                                                                     |
| 14c00072 | 0.39778 | ni     | hypothetical protein                                              | um06221   | 0.30957 | ni     | hypothetical protein                                                                               |
| 1c00046  | 0.39791 | K02975 | 40S ribosomal protein S25                                         | um04923   | 0.30969 | K13754 | conserved hypothetical protein                                                                     |
| 22d00221 | 0.39805 | ni     | hypothetical protein                                              | um11976   | 0.30995 | ni     | putative protein                                                                                   |
| 10d00228 | 0.39812 | K14773 | uncharacterized proteins of PIT N-term                            | um06448   | 0.31005 | K02975 | probable 40S ribosomal protein S25                                                                 |
| 10c00102 | 0.39816 | ni     | hypothetical protein                                              | um04594   | 0.31013 | ni     | related to TIM44 - mitochondrial inner membrane import receptor subunit                            |
| 2a00036  | 0.39858 | K12848 | U1-like Zn-finger protein                                         | um01573   | 0.31015 | ni     | conserved hypothetical protein                                                                     |
| 16c00038 | 0.3986  | K13110 | microfibrillar-associated protein MFAP1                           | um11294   | 0.31022 | ni     | ni                                                                                                 |
| 25c00055 | 0.39862 | K11484 | histone deacetylase complex, catalytic component HDA1             | um11461   | 0.31024 | K01698 | probable porphobilinogen synthase                                                                  |
| 22c00135 | 0.39891 | ni     | hypothetical protein                                              | um03755   | 0.3103  | ni     | related to ADAM protease ADNF-B                                                                    |
| 19d00101 | 0.39891 | ni     | hypothetical protein                                              | um04731   | 0.31074 | ni     | hypothetical protein                                                                               |
| 8c00056  | 0.39915 | K02906 | mitochondrial/chloroplast ribosomal protein L3                    | um00691   | 0.31076 | ni     | related to HRK1 - Protein kinase with a role in ion homeostasis                                    |
| 19d00010 | 0.39988 | K13113 | ubiquitin-like protein                                            | um05258   | 0.31108 | ni     | putative protein                                                                                   |
| 16c00020 | 0.40004 | ni     | mRNA cleavage factor I subunit                                    | um03009   | 0.31111 | ni     | related to pyridoxamine-phosphate oxidase                                                          |
| 3a00093  | 0.40076 | ni     | arylsulfatase deacetylase                                         | um04621   | 0.31114 | ni     | putative protein                                                                                   |
| 7c00030  | 0.40081 | ni     | mitochondrial sulfhydryl oxidase                                  | um10872   | 0.31126 | K01515 | related to YSA1 - sugar-nucleotide hydrolase                                                       |
| 6c00104  | 0.40084 | ni     | uncharacterized membrane protein                                  | um05931   | 0.31133 | ni     | conserved hypothetical Ustilago-specific protein                                                   |
| 8a00072  | 0.40092 | ni     | uncharacterized conserved protein                                 | um11851   | 0.31142 | K01867 | probable MSW1 - tyrosophanyl-RNA synthetase                                                        |
| 7c00153  | 0.401   | ni     | hypothetical protein                                              | um05621   | 0.31142 | ni     | conserved hypothetical Ustilago-specific protein                                                   |
| 7a00057  | 0.40105 | ni     | cyclin                                                            | um01829   | 0.31153 | ni     | related to alpha-L-arabinofuranoside I precursor                                                   |
| 26c00073 | 0.40117 | ni     | hypothetical protein                                              | um01855   | 0.31154 | ni     | conserved hypothetical protein                                                                     |
| 7a00128  | 0.40127 | ni     | hypothetical protein                                              | um12165   | 0.31162 | ni     | conserved hypothetical protein                                                                     |
| 9d00116  | 0.40127 | ni     | hypothetical protein                                              | um02376   | 0.31167 | K13501 | probable anthranilate synthase component II                                                        |
| 9c00278  | 0.40138 | ni     | hypothetical protein                                              | um10144   | 0.31172 | K00387 | related to Sulfite oxidase                                                                         |
| 22d0161  | 0.40142 | ni     | hypothetical protein                                              | um15098   | 0.31185 | ni     | putative protein                                                                                   |
| 9a00065  | 0.40164 | ni     | serine/threonine protein phosphatase                              | um02056   | 0.31193 | ni     | conserved hypothetical protein                                                                     |
| 26d00097 | 0.4018  | K06889 | predicted alpha/beta hydrolase BEM46                              | um03593   | 0.31194 | K00227 | probable steroid delta 5                                                                           |
| 6d00024  | 0.40181 | ni     | hypothetical protein                                              | um10896   | 0.31194 | ni     | probable oligopeptide transporter                                                                  |
| 27c00026 | 0.40197 | K10577 | ubiquitin-protein ligase                                          | um00590   | 0.3121  | ni     | putative protein                                                                                   |
| 5c00013  | 0.40221 | ni     | hypothetical protein                                              | um04489   | 0.31219 | ni     | probable MAS6 - mitochondrial inner membrane import translocase subunit                            |
| 3a00006  | 0.40227 | ni     | sensory transduction histidine kinase                             | um10321   | 0.3124  | K14790 | conserved hypothetical protein                                                                     |
| 27d00023 | 0.40225 | ni     | uncharacterized conserved protein                                 | um11074   | 0.31243 | ni     | related to SMC5 - Structural maintenance of chromosomes                                            |
| 6c00131  | 0.40233 | ni     | hypothetical protein                                              | um10468.2 | 0.31253 | ni     | conserved hypothetical protein                                                                     |
| 22d00114 | 0.40235 | ni     | hypothetical protein                                              | um03038   | 0.3127  | ni     | related to candidate tumor suppressor dph21                                                        |
| 13c00023 | 0.40244 | K11253 | histones H3 and H4                                                | um04486   | 0.31283 | ni     | conserved hypothetical Ustilago-specific protein                                                   |
| 22d00025 | 0.40263 | K06883 | GT-40 domain protein                                              | um17062   | 0.31286 | ni     | conserved hypothetical protein                                                                     |
| 24d00039 | 0.40255 | ni     | 60S ribosomal protein L2/L8                                       | um12150   | 0.31288 | ni     | conserved hypothetical protein                                                                     |
| 4a00043  | 0.40265 | K01738 | cysteine synthase                                                 | um02146   | 0.31298 | ni     | related to GABA permease                                                                           |
| 7c00183  | 0.4028  | ni     | GTPase-activating protein                                         | um02423   | 0.31307 | ni     | hypothetical protein                                                                               |
| 15c00066 | 0.403   | ni     | hypothetical protein                                              | um05761   | 0.31325 | K10436 | EB1-like protein                                                                                   |
| 14c00128 | 0.40306 | ni     | poly(ADP-ribose) polymerase 1 complex, subunit FIP1               | um01269   | 0.31333 | ni     | conserved hypothetical protein                                                                     |
| 14d00027 | 0.40306 | K17439 | phosphatidylethanolamine binding protein                          | um10720   | 0.31341 | ni     | related to ser                                                                                     |
| 7a00065  | 0.40308 | ni     | permease of the drug/metabolite transporter                       | um04580   | 0.31353 | ni     | conserved hypothetical protein                                                                     |
| 27c00068 | 0.40319 | K14304 | nuclear pore complex component                                    | um06086   | 0.31358 | ni     | related to branched-chain alpha-ketoacid dehydrogenase kinase                                      |
| 12c00055 | 0.40324 | ni     | hypothetical protein                                              | um11721   | 0.31361 | ni     | conserved hypothetical protein                                                                     |
| 2a00012  | 0.40357 | K14555 | WD40-repeat-containing subunit of the 18S rRNA processing co      | um15016   | 0.31385 | K14843 | conserved hypothetical protein                                                                     |
| 9c00027  | 0.40374 | ni     | hypothetical protein                                              | um00266   | 0.3139  | ni     | related to Rps34 - 34 kD subunit of DNA-directed RNA polymerase I                                  |
| 26c00082 | 0.40382 | K10398 | kinesin-like protein                                              | um11644   | 0.31397 | ni     | probable GLR1 - glutathione reductase                                                              |
| 14d00117 | 0.40424 | K02208 | cyclin C-dependent kinase CDK3                                    | um06200   | 0.31414 | K13336 | related to Peroxisomal assembly protein PEX3                                                       |
| 22c00201 | 0.40424 | ni     | predicted 2-alpha-mannosyltransferase                             | um00624   | 0.31417 | ni     | conserved hypothetical protein                                                                     |
| 3c00066  | 0.40427 | ni     | predicted methyltransferase                                       | um00624   | 0.31425 | K00999 | related to CDP diacylglycerol-inositol 3-phosphatidyltransferase                                   |
| 7c00005  | 0.40429 | K01843 | hypothetical protein                                              | um02777   | 0.31436 | K12880 | related to THO complex subunit 3                                                                   |
| 25c00026 | 0.40431 | ni     | hypothetical protein                                              | um10354   | 0.31441 | ni     | conserved hypothetical protein                                                                     |
| 2c00037  | 0.40432 | ni     | predicted transmembrane protein                                   | um03226   | 0.31448 | ni     | related to ALG6 - glucosyltransferase                                                              |
| 12d00140 | 0.40449 | ni     | hypothetical protein                                              | um03226   | 0.31451 | K03349 | related to component of the anaphase promoting complex                                             |
| 7a00150  | 0.40454 | ni     | hypothetical protein                                              | um04464   | 0.31463 | ni     | conserved hypothetical protein                                                                     |
| 9a00089  | 0.40461 | ni     | hypothetical protein                                              | um12176   | 0.31468 | K13171 | conserved hypothetical protein                                                                     |
| 26c00016 | 0.40511 | K09142 | uncharacterized conserved protein                                 | um12138.2 | 0.31478 | ni     | hypothetical protein                                                                               |
| 11c00086 | 0.40513 | ni     | hypothetical protein                                              | um04551   | 0.3148  | K15564 | conserved hypothetical protein                                                                     |
| 5c00145  | 0.40523 | ni     | hypothetical protein                                              | um11618   | 0.31481 | ni     | related to CYC2 - cytochrome-c mitochondrial import factor                                         |
| 7c00148  | 0.40535 | ni     | predicted E3 ubiquitin ligase                                     | um02662   | 0.31489 | K14558 | probable periodic tryptophan-protein PWP2                                                          |
| 14c00082 | 0.40538 | ni     | hypothetical protein                                              | um10213   | 0.3153  | K02132 | probable H -transporting ATP synthase alpha chain                                                  |
| 6c00041  | 0.40542 | ni     | gamma-glutamyltransferase                                         | um02908   | 0.31525 | K02309 | related to Hsk1-interacting molecule 1                                                             |
| 11d00016 | 0.40543 | ni     | hypothetical protein                                              | um02908   | 0.31539 | ni     | related to nitrogen assimilation transcription factor nit-4                                        |
| 5c00090  | 0.40544 | ni     | non-ribosomal peptide synthetase                                  | um05847   | 0.31544 | K01866 | probable TYS1 - tyrosyl-tRNA synthetase                                                            |
| 9a00153  | 0.40559 | K06072 | HEAT repeat-containing protein                                    | um11945   | 0.31547 | K00844 | probable hexokinase                                                                                |
| 9a00354  | 0.40562 | ni     | hypothetical protein                                              | um00607   | 0.31548 | ni     | related to phosducin homolog                                                                       |
| 4c00037  | 0.40564 | K03114 | cyclin-dependent kinase WEE1                                      | um03263   | 0.31548 | K15083 | probable RAD16 - nucleotide excision repair protein                                                |
| 7c00321  | 0.40568 | ni     | hypothetical protein                                              | um00260   | 0.31551 | ni     | putative protein                                                                                   |
| 9a00268  | 0.40587 | ni     | predicted sugar kinase                                            | um03677   | 0.31556 | ni     | hypothetical protein                                                                               |
| 20c00024 | 0.40591 | ni     | Zn finger protein                                                 | um00906.2 | 0.31574 | ni     | conserved hypothetical protein                                                                     |
| 27d00004 | 0.40602 | K12834 | uncharacterized conserved protein                                 | um02475   | 0.31574 | ni     | hypothetical protein                                                                               |
| 7a00179  | 0.40608 | ni     | hypothetical protein                                              | um02826   | 0.31589 | ni     | conserved hypothetical protein                                                                     |
| 9c00072  | 0.4061  | ni     | hypothetical protein                                              | um06215   | 0.31592 | ni     | related to protein ste16                                                                           |
| 7a00059  | 0.40611 | K10158 | thymidylate synthase                                              | um11928   | 0.31603 | ni     | related to cyclin                                                                                  |
| 16c00040 | 0.40611 | ni     | hypothetical protein                                              | um01615   | 0.31604 | ni     | putative protein                                                                                   |
| 9c00345  | 0.40611 | K03941 | NADH-tubiquinone oxidoreductase, NDUFS9/23 kDa subunit            | um10029   | 0.31604 | ni     | related to Glucan 1                                                                                |
| 8c00117  | 0.40613 | ni     | structural maintenance of chromosome protein SMC5/Spr18           | um05588   | 0.31606 | K15115 | related to FAD carrier protein FLX1                                                                |
| 8a00074  | 0.40617 | K08739 | DNA mismatch repair protein - MLH3 family                         | um04013   | 0.31607 | K11676 | conserved hypothetical protein                                                                     |
| 14d00089 | 0.40637 | ni     | hypothetical protein                                              | um03528   | 0.31608 | K01046 | related to TGL2 - triacylglycerol lipase                                                           |
| 27d00025 | 0.40639 | ni     | predicted the major facilitator superfamily                       | um10391   | 0.31615 | K11087 | conserved hypothetical protein                                                                     |
| 26c00069 | 0.4064  | ni     | Cs2/calmodulin-dependent protein kinase kinase beta               | um04229   | 0.31626 | ni     | probable hypothetical protein                                                                      |
| 9a00410  | 0.4064  | K15198 | transcription initiation factor TFIIB, Bdp1 subunit               | um10134   | 0.31639 | ni     | conserved hypothetical protein                                                                     |
| 12c00049 | 0.40641 | K14778 | ATP-dependent RNA helicase                                        | um10105   | 0.31655 | ni     | conserved hypothetical protein                                                                     |
| 11c00048 | 0.40641 | ni     | nuclear transport receptor Karyopherin-beta2/Transportin          | um05947.2 | 0.31669 | K01797 | related to DCS1 - involved in nitrogen-catabolite metabolism                                       |
| 13c00014 | 0.40644 | ni     | hypothetical protein                                              | um02468   | 0.3168  | ni     | Mgl1 protein                                                                                       |
| 3c00029  | 0.40647 | ni     | hypothetical protein                                              | um03036   | 0.31684 | ni     | conserved hypothetical protein                                                                     |
| 6c00111  | 0.40651 | ni     | hypothetical protein                                              | um10627   | 0.31689 | K01803 | related to triose-phosphate isomerase                                                              |
| 15d00069 | 0.40657 | ni     | hypothetical protein                                              | um05940   | 0.31689 | ni     | conserved hypothetical protein                                                                     |
| 5a00025  | 0.40691 | K06997 | proline synthetase co-transcribed protein                         | um04081   | 0.31696 | K00799 | related to glutathione S-transferase                                                               |
| 11d00049 | 0.40707 | ni     | hypothetical protein                                              | um05407   | 0.31721 | ni     | probable ALD4 - aldehyde dehydrogenase                                                             |
| 8c00071  | 0.40715 | K17080 | prothelin                                                         | um00564   | 0.31734 | K01488 | related to adenosine deaminase                                                                     |
| 7c00070  | 0.40716 | ni     | hypothetical protein                                              | um12136   | 0.31735 | ni     | conserved hypothetical protein                                                                     |
| 6a00011  | 0.40761 | K15283 | glucose-6-phosphate/phosphate and phosphoenolpyruvate/phosph      | um05145   | 0.31749 | ni     | putative protein                                                                                   |
| 26d00086 | 0.40768 | K12908 | hypothetical protein                                              | um10574   | 0.31753 | K13107 | related to iron binding motif protein                                                              |
| 20c00057 | 0.40774 | K00764 | glutamine phosphoribosylpyrophosphate amidotransferase            | um06001   | 0.3176  | ni     | conserved hypothetical protein                                                                     |
| 7c00103  | 0.40781 | K14169 | hypothetical protein                                              | um00540   | 0.31764 | ni     | conserved hypothetical protein                                                                     |
| 22d00272 | 0.40788 | ni     | hypothetical protein                                              | um04188   | 0.31765 | K12815 | probable PRP16 - RNA-dependent ATPase                                                              |
| 16c00086 | 0.40791 | ni     | hypothetical protein                                              | um03461   | 0.31808 | ni     | conserved hypothetical protein                                                                     |
| 22c00269 | 0.40808 | K01062 | phospholipase A2                                                  | um05180   | 0.31832 | K14820 | related to BRX1 - Essential nucleolar protein required for biogenesis of the 60S ribosomal subunit |
| 13c00071 | 0.40845 | K03615 | hypothetical protein                                              | um10651   | 0.31836 | ni     | conserved hypothetical protein                                                                     |
| 20a00006 | 0.40848 | K02178 | mitotic checkpoint serine/threonine protein kinase                | um01587   | 0.31845 | ni     | ni                                                                                                 |
| 7a00101  | 0.4088  | ni     | hypothetical protein                                              | um00614   | 0.31864 | K11518 | probable TOM40 - mitochondrial import receptor                                                     |
| 22d0187  | 0.40885 | ni     | hypothetical protein                                              | um05917   | 0.31865 | K01669 | related to Deoxyribosylprimidilate photolyase                                                      |
| 12d00114 | 0.40899 | ni     | hypothetical protein                                              | um01931   | 0.31872 | K02350 | probable catalytic subunit of DNA polymerase zeta UPR-1                                            |
| 19c00021 | 0.40903 | K06269 | serine/threonine specific protein phosphatase PP1, catalytic subu | um06003   | 0.31878 | K09578 | probable prolyl isomerase Ess1                                                                     |
| 10c0030  | 0.40911 | K11770 | SWI-SNF chromatin remodeling complex, Snt5 subunit                | um11292   | 0.3188  | K06970 | conserved hypothetical protein                                                                     |
| 9a00321  | 0.40942 | K10842 | predicted E3 ubiquitin ligase                                     | um10230   | 0.31891 | K03031 | hypothetical protein                                                                               |
| 27d0102  | 0.40953 | ni     | ATP-dependent DNA helicase                                        | um02731   | 0.31885 | K05292 | related to GPI-anchor transamidase complex subunit Gpi16                                           |
| 2a00028  | 0.40965 | K08342 | cysteine protease                                                 | um12251   | 0.3192  | ni     | conserved hypothetical protein                                                                     |
| 22d00232 | 0.40999 | K01626 | hypothetical protein                                              | um05538   | 0.31929 | ni     | putative protein                                                                                   |
| 25c00007 | 0.41006 | ni     | hypothetical protein                                              | um05498   | 0.31956 | ni     | related to putative oxysterol-binding protein OSBP                                                 |
| 18d00016 | 0.41008 | K06070 | acyltolerantase                                                   | um02468   | 0.31957 | ni     | related to ABC1 - ubiquitin-cytochrome-c reductase complex assembly protein                        |
| 7a00080  | 0.41023 | ni     | predicted membrane protein                                        | um03599   | 0.31981 | K16948 | probable CDC12 - septin                                                                            |
| 19d00088 | 0.41031 | K03456 | protein phosphatase 2A regulatory subunit A and related proteins  | um02889   | 0.31987 | K08508 | related to SEC9 - protein transport protein                                                        |
| 9a00425  | 0.41037 | ni     | hypothetical protein                                              | um06036   | 0.31994 | K12261 | Coiled-coil domain-containing protein 12                                                           |
| 7a000294 | 0.4109  | K00600 | glycine serine hydroxymethyltransferase                           | um04775   | 0.32005 | K11093 | conserved hypothetical protein                                                                     |
| 11d00004 | 0.41064 | ni     | hypothetical protein                                              | um10437   | 0.32003 | ni     | conserved hypothetical protein                                                                     |
| 7c00324  | 0.4107  | ni     | hypothetical protein                                              | um05760   | 0.32066 | ni     | hypothetical protein                                                                               |
| 22d00085 | 0.41088 | K11806 | sof1-like rRNA processing protein                                 | um01321   | 0.32067 |        |                                                                                                    |

|          |         |        |                                                                       |           |         |                         |                                                                                                   |
|----------|---------|--------|-----------------------------------------------------------------------|-----------|---------|-------------------------|---------------------------------------------------------------------------------------------------|
| 27d00100 | 0.41363 | K03679 | exosomal 3'-5' exonuclease complex, subunit Rrp4                      | um02007.2 | 0.32263 | ni                      | related to mitochondrial carrier family protein                                                   |
| 3400012  | 0.41373 | ni     | hypothetical protein                                                  | um10376   | 0.32271 | ni                      | conserved hypothetical protein                                                                    |
| 22c00197 | 0.41384 | ni     | hypothetical protein                                                  | um00477   | 0.32285 | ni                      | related to Monocarboxylate transporter 1                                                          |
| 18c00056 | 0.41389 | ni     | uncharacterized conserved protein                                     | um04789   | 0.32309 | K14785                  | conserved hypothetical protein                                                                    |
| 5c00006  | 0.41391 | ni     | hypothetical protein                                                  | um10824   | 0.3231  | K12397                  | related to Beta3 protein                                                                          |
| 22d00218 | 0.41401 | ni     | hypothetical protein                                                  | um02075   | 0.32311 | ni                      | related to calpain-like protease PalBory                                                          |
| 25c00044 | 0.41411 | ni     | dimeric dihydrodipicolyl dehydrogenase                                | um00629   | 0.3232  | ni                      | putative protein                                                                                  |
| 22c00088 | 0.41423 | K01647 | citrate synthase                                                      | um00573   | 0.32327 | ni                      | conserved hypothetical protein                                                                    |
| 15c00094 | 0.41427 | ni     | voltage-gated shaker-like K <sup>+</sup> channel, subunit beta2KCNA B | um00947   | 0.32337 | ni                      | related to Stress-activated map kinase interacting protein 1                                      |
| 14d00051 | 0.41509 | ni     | hypothetical protein                                                  | um10955   | 0.32348 | ni                      | conserved hypothetical protein                                                                    |
| 9d000242 | 0.41515 | ni     | hypothetical protein                                                  | um00294   | 0.32353 | K02873                  | probable ribosomal protein L13B                                                                   |
| 7d000255 | 0.41541 | K04799 | 5'-3' UTR binding protein                                             | um11194   | 0.32357 | K0354                   | related to cap-dependent cap protease                                                             |
| 20d00017 | 0.41561 | K03783 | purine nucleoside phosphorylase                                       | um06388   | 0.32374 | K02954                  | related to MRP2 - mitochondrial ribosomal protein                                                 |
| 15c00042 | 0.41563 | ni     | hypothetical protein                                                  | um05995   | 0.32378 | ni                      | related to Acid phosphatase precursor                                                             |
| 89d00001 | 0.41567 | ni     | ni                                                                    | um04227   | 0.32386 | ni                      | putative protein                                                                                  |
| 11d00027 | 0.41571 | ni     | hypothetical protein                                                  | um05361   | 0.32401 | ni                      | related to Laccase I precursor                                                                    |
| 25d00081 | 0.41591 | ni     | hypothetical protein                                                  | um00577   | 0.32419 | ni                      | conserved hypothetical protein                                                                    |
| 19d00113 | 0.41624 | K00833 | acetylornithine aminotransferase                                      | um06349   | 0.32427 | ni                      | related to siderophore iron transporter mirc                                                      |
| 22c00268 | 0.41629 | K01477 | allantoicase                                                          | um05773   | 0.32456 | ni                      | putative protein                                                                                  |
| 7c00113  | 0.41646 | ni     | hypothetical protein                                                  | um01961   | 0.3246  | ni                      | hypothetical protein                                                                              |
| 26d00063 | 0.41647 | K09549 | molecular chaperone Prefoldin, subunit 2                              | um02089   | 0.32462 | K03350                  | related to nuclear protein binA                                                                   |
| 15d00090 | 0.41659 | K13348 | peroxisomal membrane protein MPV17 and related proteins               | um05527   | 0.32482 | ni                      | conserved hypothetical protein                                                                    |
| 8d00075  | 0.41667 | ni     | hypothetical protein                                                  | um03244   | 0.32488 | K11319                  | conserved hypothetical protein                                                                    |
| 10d00094 | 0.41669 | K16261 | amino acid transporters                                               | um06255   | 0.32495 | ni                      | hypothetical protein                                                                              |
| 15d00071 | 0.41688 | ni     | hypothetical protein                                                  | um04350   | 0.32514 | ni                      | related to 3-phosphase A precursor                                                                |
| 7c00218  | 0.41735 | ni     | translocase of outer mitochondrial membrane complex, subunit T        | um10809.2 | 0.3253  | ni                      | hypothetical protein                                                                              |
| 22c00188 | 0.41743 | ni     | hypothetical protein                                                  | um04811   | 0.32554 | ni                      | related to ADP1 - ABC transporter                                                                 |
| 9c00403  | 0.41745 | K02918 | 60S ribosomal protein L35                                             | um04744   | 0.32603 | ni                      | conserved hypothetical protein                                                                    |
| 18c00081 | 0.41761 | K10844 | RNA polymerase II transcription initiation/nucleotide excision repa   | um11305   | 0.32606 | ni                      | conserved hypothetical protein                                                                    |
| 13c00053 | 0.41765 | K02892 | hypothetical protein                                                  | um11616   | 0.32619 | ni                      | related to TIM13 - Translocase of the inner membrane                                              |
| 22d00244 | 0.41782 | ni     | hypothetical protein                                                  | um03293   | 0.32628 | K01530                  | related to ONP1 - protein transporter                                                             |
| 27d00004 | 0.41788 | K02899 | mitochondrial ribosomal protein MRP7                                  | um02688   | 0.32658 | ni                      | putative protein                                                                                  |
| 10d00080 | 0.4179  | K11090 | FOG, RRM domain                                                       | um01360   | 0.32709 | ni                      | hypothetical protein                                                                              |
| 6c00088  | 0.41804 | ni     | hypothetical protein                                                  | um11852   | 0.32711 | K08773                  | related to BEM3 - GTPase-activating protein                                                       |
| 11c00332 | 0.41807 | K00801 | squalene synthase                                                     | um01913   | 0.32724 | ni                      | putative protein                                                                                  |
| 22c00169 | 0.41814 | ni     | hypothetical protein                                                  | um01657   | 0.32739 | ni                      | putative protein                                                                                  |
| 13c00001 | 0.41821 | ni     | hypothetical protein                                                  | um10430   | 0.3274  | ni                      | related to cell cycle control protein cwf25                                                       |
| 25d00043 | 0.41823 | ni     | 1-aminocyclopropane-1-carboxylate synthase                            | um10729   | 0.32751 | ni                      | conserved hypothetical protein                                                                    |
| 4d00002  | 0.4183  | ni     | hypothetical protein                                                  | 0.32758   | K01556  | related to kynureninase |                                                                                                   |
| 9c00082  | 0.41832 | ni     | hypothetical protein                                                  | um04024   | 0.32758 | ni                      | related to Choline dehydrogenase                                                                  |
| 16d00017 | 0.41838 | ni     | hypothetical protein                                                  | um10724   | 0.32759 | K02867                  | probable MRPL19 - mitochondrial ribosomal protein                                                 |
| 22c00297 | 0.41843 | ni     | hypothetical protein                                                  | um01249   | 0.32803 | K12622                  | probable LSM3 - U6 snRNA-associated Sm-like protein                                               |
| 10c00031 | 0.41859 | K14563 | fibrillarin and related nucleolar RNA-binding proteins                | um11563   | 0.32803 | ni                      | conserved hypothetical protein                                                                    |
| 7c00247  | 0.41862 | ni     | hypothetical protein                                                  | um10693   | 0.32818 | K14845                  | related to RA11 - Rat1p Interacting Protein                                                       |
| 9c00039  | 0.41864 | ni     | hypothetical protein                                                  | um02045   | 0.32819 | ni                      | conserved hypothetical protein                                                                    |
| 22d00011 | 0.41868 | K02327 | DNA polymerase delta, catalytic subunit                               | um02823   | 0.32846 | K11269                  | related to CTF18 - Chromosome Transmission Fidelity factor                                        |
| 7d00193  | 0.41881 | ni     | hypothetical protein                                                  | um02537   | 0.32854 | ni                      | conserved Hypothetical protein                                                                    |
| 10d00335 | 0.41884 | K01057 | 6-phosphogluconate-2-epimerase-like protein                           | um01954   | 0.32857 | ni                      | conserved hypothetical protein                                                                    |
| 22c00147 | 0.41896 | ni     | hypothetical protein                                                  | um00317   | 0.32861 | ni                      | hypothetical protein                                                                              |
| 9d00206  | 0.4192  | K01259 | hypothetical protein                                                  | um03700   | 0.32864 | K16261                  | probable DIP5 - Glutamate and aspartate permease - able to mediate transport of other amino acids |
| 22d00297 | 0.41929 | ni     | hypothetical protein                                                  | um02966   | 0.32878 | K14721                  | conserved hypothetical protein                                                                    |
| 12d00051 | 0.41945 | K03251 | translational initiation factor 3, subunit d                          | um01624   | 0.32891 | K14006                  | probable SEC23 - component of COPII coat of ER-golgi vesicles                                     |
| 7c00099  | 0.41946 | ni     | hypothetical protein                                                  | um05128   | 0.32892 | ni                      | conserved hypothetical protein                                                                    |
| 2d00073  | 0.41953 | K14842 | uncharacterized conserved protein related to ribosomal protein S1     | um11952   | 0.32894 | K04079                  | probable heat shock protein 80                                                                    |
| 18c00103 | 0.4196  | ni     | hypothetical protein                                                  | um01161   | 0.32897 | ni                      | related to BEM2 - GTPase-activating protein                                                       |
| 7d00343  | 0.41968 | K02875 | 60S ribosomal protein L14                                             | um02264   | 0.32901 | ni                      | putative protein                                                                                  |
| 14d00085 | 0.41972 | ni     | hypothetical protein                                                  | um10371   | 0.32909 | K08266                  | related to LSTR - required for transport of permeases from the golgi to the plasma membrane       |
| 22c00246 | 0.41991 | ni     | hypothetical protein                                                  | um02159   | 0.32912 | ni                      | conserved hypothetical protein                                                                    |
| 10d00037 | 0.41993 | ni     | hypothetical protein                                                  | um01156   | 0.32948 | ni                      | related to myo-inositol transporter                                                               |
| 18d00024 | 0.42019 | ni     | MEKK and related serine/threonine protein kinases                     | um06363   | 0.3297  | K08269                  | related to APG1 - essential for autophagocytosis                                                  |
| 15d00057 | 0.4202  | ni     | flavin-containing monooxygenase                                       | um02227   | 0.32972 | K01230                  | related to alpha-mannosidase                                                                      |
| 9c00203  | 0.42022 | ni     | hypothetical protein                                                  | um05132   | 0.32983 | K012175                 | related to COP9 signalosome complex subunit 1                                                     |
| 20d00078 | 0.42022 | ni     | hypothetical protein                                                  | um01531   | 0.33001 | ni                      | related to Importin 11                                                                            |
| 13d00076 | 0.42024 | ni     | transport protein particle TRAPP complex subunit                      | um05278   | 0.33011 | ni                      | conserved hypothetical protein                                                                    |
| 7c00280  | 0.42031 | K06867 | FOG, Ankyrin repeat                                                   | um10036   | 0.33011 | K03352                  | conserved hypothetical protein                                                                    |
| 6c00119  | 0.42047 | ni     | hypothetical protein                                                  | um12291   | 0.33021 | ni                      | conserved hypothetical protein                                                                    |
| 15d00027 | 0.4205  | ni     | hypothetical protein                                                  | um12182   | 0.33045 | ni                      | putative protein                                                                                  |
| 8c00069  | 0.42052 | ni     | hypothetical protein                                                  | um05922   | 0.33061 | ni                      | related to RMD6 - Cytosolic protein required for sporulation                                      |
| 6d00134  | 0.42064 | K13100 | uncharacterized conserved protein                                     | um04038   | 0.33071 | ni                      | hypothetical protein                                                                              |
| 27c00006 | 0.42064 | ni     | regulator of Rac1                                                     | um10923.2 | 0.33085 | ni                      | conserved hypothetical protein                                                                    |
| 13d00049 | 0.42065 | K12843 | putative uL6 small nuclear ribonucleoprotein                          | um05191   | 0.33096 | ni                      | putative protein                                                                                  |
| 7d00347  | 0.4208  | K01881 | prolyl-tRNA synthetase                                                | um11736   | 0.33099 | ni                      | putative protein                                                                                  |
| 8c00121  | 0.4211  | ni     | hypothetical protein                                                  | um04849   | 0.33112 | ni                      | hypothetical protein                                                                              |
| 26c00031 | 0.42117 | K02922 | 60S ribosomal protein L37                                             | um05458   | 0.33122 | ni                      | related to CCH1 - Calcium channel                                                                 |
| 9c00009  | 0.42123 | ni     | predicted steroid reductase                                           | um10338   | 0.33125 | ni                      | conserved hypothetical protein                                                                    |
| 12c00124 | 0.42134 | K03027 | RNA polymerase I and III, subunit RPA40/RPC40                         | um02278   | 0.33138 | ni                      | putative protein                                                                                  |
| 22d00248 | 0.42137 | ni     | hypothetical protein                                                  | um02221   | 0.33154 | ni                      | conserved hypothetical protein                                                                    |
| 8d00104  | 0.42139 | ni     | hypothetical protein                                                  | um03435   | 0.33161 | ni                      | conserved hypothetical protein                                                                    |
| 14d00124 | 0.4217  | ni     | FOG, Zn-finger                                                        | um01210   | 0.33172 | ni                      | related to mitochondrial import receptor subunit TOM20                                            |
| 5d00033  | 0.42175 | K01613 | predicted histone H4 acetyltransferase                                | um10457   | 0.33173 | ni                      | related to protein involved in intramitochondrial protein sorting                                 |
| 22c00236 | 0.42191 | K00540 | NADH, flavin oxidoreductase                                           | um10195   | 0.3321  | K10956                  | probable endoplasmic reticulum insertion protein SEC61                                            |
| 6c00132  | 0.42195 | ni     | hypothetical protein                                                  | um10662   | 0.33217 | K15544                  | probable SSU72 - Nuclear zinc-finger motif containing protein                                     |
| 3d00063  | 0.42218 | ni     | hypothetical protein                                                  | um03055   | 0.33226 | ni                      | conserved hypothetical protein                                                                    |
| 20d00021 | 0.42218 | ni     | hypothetical protein                                                  | um12168   | 0.33248 | ni                      | putative protein                                                                                  |
| 7d00147  | 0.42219 | K02931 | mitochondrial/chloroplast ribosomal protein L5/L7                     | um02338   | 0.3326  | K0488                   | related to PEP12 syntactin                                                                        |
| 9c00065  | 0.42254 | ni     | aquaporin                                                             | um01006   | 0.33266 | ni                      | conserved hypothetical protein                                                                    |
| 25c00084 | 0.42257 | K03939 | NADH:ubiquinone oxidoreductase, NDUFS6/13 kDa subunit                 | um10787   | 0.3327  | K01679                  | probable FUM1 - fumarate hydratase                                                                |
| 7c00299  | 0.4226  | ni     | hypothetical protein                                                  | um06383   | 0.33273 | ni                      | related to MAP kinase                                                                             |
| 6c00095  | 0.42265 | K02835 | mitochondrial polypeptide chain release factor                        | um0071    | 0.33276 | ni                      | putative protein                                                                                  |
| 22c00299 | 0.42279 | ni     | hypothetical protein                                                  | um01732   | 0.33296 | K14811                  | probable DBP3 - putative RNA helicase required for pre-rRNA processing                            |
| 21c00003 | 0.42294 | ni     | hypothetical protein                                                  | um02351   | 0.33317 | K14684                  | related to mitochondrial carrier protein                                                          |
| 22c00141 | 0.42295 | ni     | hypothetical protein                                                  | um05115   | 0.33318 | ni                      | conserved hypothetical protein                                                                    |
| 10c00056 | 0.42303 | ni     | hypothetical protein                                                  | um01215   | 0.33333 | ni                      | related to vacuolar segregation protein PEP7                                                      |
| 2c00084  | 0.42307 | ni     | sirtuin 4 and related class II sirtuins                               | um02044   | 0.33337 | K01874                  | probable METHIONYL-tRNA SYNTHETASE                                                                |
| 12d00080 | 0.42308 | K14753 | G protein beta subunit-like protein                                   | um04278.2 | 0.33339 | ni                      | putative protein                                                                                  |
| 27d00080 | 0.4231  | K11667 | uncharacterized conserved protein                                     | um12319   | 0.33356 | ni                      | hypothetical protein                                                                              |
| 8c00055  | 0.42312 | ni     | hypothetical protein                                                  | um03950   | 0.33372 | K15304                  | related to YRB2 - Ran-GTPase-binding protein involved in nuclear protein export                   |
| 18d00116 | 0.42313 | ni     | hypothetical protein                                                  | um15179   | 0.33376 | ni                      | putative protein                                                                                  |
| 9c00025  | 0.42315 | K14455 | aspartate aminotransferase                                            | um03047   | 0.33382 | ni                      | hypothetical protein                                                                              |
| 26d00071 | 0.42347 | ni     | hypothetical protein                                                  | um11901   | 0.33385 | ni                      | related to Lactamase                                                                              |
| 24d00043 | 0.42372 | ni     | hypothetical protein                                                  | um02895   | 0.3341  | ni                      | related to ERG27 - 3-keto sterol reductase                                                        |
| 7d00149  | 0.42384 | K13431 | signal recognition particle receptor, alpha subunit                   | um00703   | 0.3343  | K04536                  | G-protein beta subunit Bpp1                                                                       |
| 11c00087 | 0.42387 | ni     | invasion-inducing protein TIAM1/DC24                                  | um11160   | 0.33434 | ni                      | hypothetical protein                                                                              |
| 14c00009 | 0.42402 | ni     | uncharacterized conserved protein                                     | um01427   | 0.33437 | ni                      | related to Crg1 protein                                                                           |
| 5d00014  | 0.42419 | K02933 | mitochondrial/chloroplast ribosomal protein L6                        | um04072   | 0.33456 | ni                      | conserved hypothetical protein                                                                    |
| 20d00060 | 0.42423 | K08734 | DNA mismatch repair protein - MLH1 family                             | um05583   | 0.33485 | ni                      | putative protein                                                                                  |
| 15d00024 | 0.42452 | ni     | hypothetical protein                                                  | um05659   | 0.33449 | ni                      | conserved hypothetical protein                                                                    |
| 6c00026  | 0.42454 | ni     | methyltransferase                                                     | um02559   | 0.33494 | K15306                  | probable YRB1 - ran-specific GTPase-activating protein                                            |
| 7c00227  | 0.42457 | K11699 | RNA-directed RNA polymerase QDE-1                                     | um11477   | 0.33503 | ni                      | conserved hypothetical protein                                                                    |
| 5c00124  | 0.4246  | ni     | cholesterol transport protein                                         | um03672   | 0.33509 | K14298                  | related to GLE2 - required for nuclear pore complex structure and function                        |
| 7d00072  | 0.42471 | ni     | hypothetical protein                                                  | um10874   | 0.33512 | ni                      | conserved hypothetical protein                                                                    |
| 6c00098  | 0.42481 | ni     | hypothetical protein                                                  | um04886   | 0.3354  | ni                      | related to Hc1 protein                                                                            |
| 10c00069 | 0.42486 | ni     | hypothetical protein                                                  | um10837   | 0.33558 | ni                      | conserved hypothetical protein                                                                    |
| 25c00032 | 0.42498 | ni     | hypothetical protein                                                  | um02268   | 0.33571 | ni                      | putative protein                                                                                  |
| 4c00030  | 0.42517 | K00799 | glutathione S-transferase                                             | um04031   | 0.3358  | ni                      | related to BST1 - negative regulator of COPII vesicle formation                                   |
| 6c00133  | 0.4252  | ni     | FOG, Zn-finger                                                        | um02079   | 0.33583 | K02947                  | probable ribosomal protein S10                                                                    |
| 27d00034 | 0.42521 | ni     | hypothetical protein                                                  | um12229   | 0.33598 | ni                      | related to diacylglycerol                                                                         |
| 10d00072 | 0.42539 | K11426 | predicted histone tail methylase containing SET domain                | um01284   | 0.33636 | K06027                  | probable SEC18 - vesicular-fusion protein                                                         |
| 6c00003  | 0.42544 | ni     | hypothetical protein                                                  | um02828   | 0.33647 | ni                      | conserved hypothetical protein                                                                    |
| 9c00269  | 0.42551 | ni     | hypothetical protein                                                  | um02558   | 0.33678 | K15202                  | conserved hypothetical protein                                                                    |
| 18c00046 | 0.42559 | ni     | densitly-regulated protein related to translation initiation factor 1 | um01852   | 0.33704 | K0869                   | conserved hypothetical protein                                                                    |
| 5c00111  | 0.42559 | ni     | hypothetical protein                                                  | um03809   | 0.33712 | K00889                  | related to phosphatidylinositol-4-phosphate 5-kinase                                              |
| 9d00188  | 0.42565 | ni     | hypothetical protein                                                  | um11330   |         |                         |                                                                                                   |



|          |         |        |                                                                                       |           |         |        |                                                                                                           |
|----------|---------|--------|---------------------------------------------------------------------------------------|-----------|---------|--------|-----------------------------------------------------------------------------------------------------------|
| 5400030  | 0.42949 | K10847 | DNA excision repair protein XPA/XPC/RAD14                                             | um11532   | 0.34064 | ni     | conserved hypothetical protein                                                                            |
| 14400120 | 0.42968 | K03539 | protein subunit of nuclear ribonuclease P                                             | um10763   | 0.34081 | K03469 | conserved hypothetical protein                                                                            |
| 7600165  | 0.42971 | ni     | hypothetical protein                                                                  | um00012   | 0.34091 | ni     | related to ZIM17 - Zinc finger Motif protein                                                              |
| 19c00011 | 0.42981 | ni     | hypothetical protein                                                                  | um03691   | 0.34112 | ni     | conserved hypothetical protein                                                                            |
| 22c00165 | 0.42989 | K13728 | mitotic spindle checkpoint protein                                                    | um01227   | 0.34115 | ni     | hypothetical protein                                                                                      |
| 9400019  | 0.43008 | ni     | hypothetical protein                                                                  | um03908   | 0.34128 | ni     | related to TPO1 - Vacuolar polyamine-H <sup>+</sup> antiporter                                            |
| 13c00011 | 0.4301  | ni     | glucose-repressible alcohol dehydrogenase transcriptional effect                      | um11312   | 0.34128 | ni     | conserved hypothetical protein                                                                            |
| 15c00017 | 0.43018 | ni     | subunit of cargo transport vesicle tethering complex - Sec34p                         | um04431   | 0.34129 | K02995 | probable RPS8A - ribosomal protein S8                                                                     |
| 22d00078 | 0.43018 | ni     | uncharacterized conserved protein                                                     | um11494   | 0.34131 | K14012 | related to SHP1 - potential regulatory subunit for Gic7p                                                  |
| 11c00010 | 0.43021 | ni     | hypothetical protein                                                                  | um01032   | 0.34133 | ni     | related to ROM2 - GDP                                                                                     |
| 16d00082 | 0.43025 | ni     | hypothetical protein                                                                  | um04681   | 0.34136 | ni     | hypothetical protein                                                                                      |
| 9d00193  | 0.43027 | K02936 | 60S ribosomal protein L7A                                                             | um11770   | 0.34141 | ni     | conserved hypothetical protein                                                                            |
| 5400002  | 0.4303  | K00262 | glutamate/leucine/phenylalanine/valine dehydrogenases                                 | um04271   | 0.34143 | ni     | putative protein                                                                                          |
| 7d00152  | 0.43043 | K00058 | D-3-phosphoglycerate dehydrogenase                                                    | um06035   | 0.34155 | K00764 | probable ADE4 - amidophosphoribosyltransferase                                                            |
| 25d00005 | 0.4305  | ni     | hypothetical protein                                                                  | um10048   | 0.34178 | ni     | related to COX8 - cytochrome-c oxidase chain VIII                                                         |
| 13c00028 | 0.43059 | K12737 | peptidyl-prolyl cis-trans isomerase                                                   | um03803   | 0.34181 | K10389 | gamma-tubulin                                                                                             |
| 7d00153  | 0.43067 | K01372 | bicoid/mycrin hydrolases and aminopeptidases of cysteine protease                     | um04571   | 0.34194 | ni     | probable RKM101 - mitochondrial genome maintenance protein                                                |
| 1d00001  | 0.43075 | ni     | hypothetical protein                                                                  | um00786   | 0.342   | ni     | conserved hypothetical protein                                                                            |
| 22c00296 | 0.43082 | K15979 | transcriptional coactivator p100                                                      | um11017   | 0.34201 | ni     | related to CAP59                                                                                          |
| 9c00255  | 0.43094 | ni     | hypothetical protein                                                                  | um10554   | 0.34203 | ni     | conserved hypothetical Ustilago-specific protein                                                          |
| 22c00001 | 0.43101 | K10759 | hypothetical protein                                                                  | um05310   | 0.34212 | ni     | conserved hypothetical Ustilago-specific protein                                                          |
| 12c00069 | 0.43101 | ni     | hypothetical protein                                                                  | um05239   | 0.34218 | ni     | related to NAD-dependent deacetylase sirtuin type 4                                                       |
| 2c00026  | 0.43104 | K07300 | Ca2+/H <sup>+</sup> antiporter VCX1                                                   | um02211   | 0.34258 | K08073 | related to bifunctional polyphosphatase                                                                   |
| 16c00057 | 0.43107 | K01858 | myo-inositol-1-phosphate synthase                                                     | um00762   | 0.34261 | ni     | hypothetical protein                                                                                      |
| 3000006  | 0.43107 | ni     | hypothetical protein                                                                  | um10943   | 0.34266 | ni     | conserved hypothetical protein                                                                            |
| 7d00141  | 0.43109 | K12857 | UlsA/HRP-specific protein-like factor and related proteins                            | um11943.2 | 0.34271 | ni     | conserved hypothetical protein                                                                            |
| 7c00029  | 0.43127 | ni     | mitochondrial carnitine-acylcarnitine carrier protein                                 | um02850   | 0.34282 | ni     | ni                                                                                                        |
| 9c00143  | 0.43132 | ni     | mitochondrial fatty acid anion carrier protein                                        | um05819   | 0.34303 | ni     | hypothetical protein                                                                                      |
| 27d00015 | 0.43137 | K03320 | ammonia permease                                                                      | um11642   | 0.34318 | ni     | conserved hypothetical protein                                                                            |
| 10c00086 | 0.43149 | ni     | mitochondrial/lysosomal beta-ketothio-ACP reductase                                   | um02967   | 0.34324 | K03686 | related to MDJ1 - heat shock protein                                                                      |
| 22d00179 | 0.43156 | ni     | uncharacterized conserved protein                                                     | um01230   | 0.34329 | K14676 | related to NTE1 - Serine esterase                                                                         |
| 19d00072 | 0.43156 | ni     | beta-1rpt (transducin repeats containing)/Slmb proteins                               | um11650   | 0.34366 | ni     | related to Oxidoreductase                                                                                 |
| 13c00090 | 0.43179 | ni     | hypothetical protein                                                                  | um05734   | 0.34368 | K04513 | probable GTPase Rho1                                                                                      |
| 20c00062 | 0.43182 | ni     | hypothetical protein                                                                  | um02853   | 0.34369 | ni     | conserved hypothetical Ustilago-specific protein                                                          |
| 9c00187  | 0.43183 | ni     | uncharacterized conserved protein                                                     | um01298.2 | 0.34389 | ni     | conserved hypothetical Ustilago-specific protein                                                          |
| 12c00025 | 0.4321  | ni     | hypothetical protein                                                                  | um04985   | 0.34424 | ni     | probable ORM1 - unfolded protein response protein                                                         |
| 10c00077 | 0.43214 | ni     | uncharacterized conserved protein                                                     | um01099   | 0.34427 | K00022 | probable short chain 3-hydroxyacyl-CoA dehydrogenase                                                      |
| 9c00179  | 0.43238 | ni     | lish moff-containing protein                                                          | um05354.2 | 0.34428 | ni     | conserved hypothetical protein                                                                            |
| 16d00036 | 0.43262 | ni     | hypothetical protein                                                                  | um05334   | 0.34437 | ni     | putative protein                                                                                          |
| 12d00062 | 0.43262 | ni     | hypothetical protein                                                                  | um01252   | 0.3444  | K06943 | probable NOG1 - nuclear G-protein required for 60S ribosomal subunit biogenesis                           |
| 25d00021 | 0.4329  | ni     | hypothetical protein                                                                  | um10568.2 | 0.34479 | ni     | conserved hypothetical protein                                                                            |
| 9c00181  | 0.43302 | K10689 | ubiquitin-protein ligase                                                              | um05753   | 0.34482 | ni     | hypothetical protein                                                                                      |
| 8c00095  | 0.4332  | ni     | lipid exporter ABCA1 and related proteins                                             | um05058   | 0.34486 | K00658 | probable KGG2 - dihydrolipoil transsuccinylase component of the alpha-ketoglutarate dehydrogenase complex |
| 26d00005 | 0.43334 | K08337 | ubiquitin-activating E1 enzyme-like protein                                           | um03000   | 0.34502 | ni     | conserved hypothetical protein                                                                            |
| 15d00016 | 0.43345 | ni     | hypothetical protein                                                                  | um01814   | 0.34511 | ni     | conserved hypothetical protein                                                                            |
| 5c00080  | 0.43345 | ni     | hypothetical protein                                                                  | um10037   | 0.34513 | ni     | probable mitochondrial import receptor subunit tom7                                                       |
| 26c00081 | 0.43345 | K17387 | kinesin-like protein                                                                  | um03058   | 0.34526 | K02953 | probable 40S ribosomal protein S13                                                                        |
| 7c00249  | 0.4335  | K15113 | mitochondrial carrier protein MRS3/4                                                  | um10478   | 0.34551 | ni     | related to RER1 protein                                                                                   |
| 9d00345  | 0.43367 | ni     | membrane coat complex Retromer, subunit VPSS/SNX1                                     | um02226   | 0.34551 | ni     | conserved hypothetical protein                                                                            |
| 25c00090 | 0.43374 | ni     | hypothetical protein                                                                  | um04816   | 0.34561 | ni     | related to Endoglycanase 1 precursor                                                                      |
| 22d00054 | 0.43375 | K01889 | phenylalanyl-tRNA synthetase, beta subunit                                            | um00563   | 0.34565 | ni     | related to MRPL33 - mitochondrial ribosomal protein                                                       |
| 9d00387  | 0.43385 | ni     | hypothetical protein                                                                  | um02141   | 0.34575 | ni     | effector family protein Eff1-11                                                                           |
| 5c00128  | 0.43385 | K03062 | 26S proteasome regulatory complex, ATPase RPT2                                        | um01511   | 0.34582 | ni     | hypothetical protein                                                                                      |
| 22c00312 | 0.43406 | K13704 | predicted alpha/beta hydrolase                                                        | um11405   | 0.34589 | K03358 | related to anaphase promoting complex subunit 11                                                          |
| 9c00122  | 0.43415 | ni     | synaptic vesicle transporter SV2                                                      | um04301   | 0.34601 | K14827 | conserved hypothetical protein                                                                            |
| 22d00124 | 0.43451 | K03657 | 3'-5' DNA helicase                                                                    | um01387   | 0.3461  | ni     | putative protein                                                                                          |
| 13c00006 | 0.43453 | ni     | synaptic vesicle transporter SVOP and related transporters                            | um11811   | 0.34612 | K06770 | probable RhoGAP1 - Rho GTPase-activating protein                                                          |
| 9c00173  | 0.43456 | ni     | WD40 repeat protein                                                                   | um00310   | 0.34621 | K14829 | related to WD-repeat protein crtb3                                                                        |
| 7d00204  | 0.43482 | K03002 | RNA polymerase I, second largest subunit                                              | um02656   | 0.34624 | ni     | conserved hypothetical protein                                                                            |
| 9c00253  | 0.43489 | K06678 | chromosome condensation complex Condensin, subunit G                                  | um01512   | 0.34643 | K11718 | related to UDP-glucose                                                                                    |
| 4d00020  | 0.43491 | K16302 | predicted membrane protein                                                            | um02452   | 0.34647 | ni     | putative protein                                                                                          |
| 9c00172  | 0.43492 | ni     | GTP-binding ADP-ribosylation factor Arf1                                              | um15039   | 0.3465  | K15223 | conserved hypothetical protein                                                                            |
| 25c00056 | 0.43546 | ni     | predicted membrane protein                                                            | um04251   | 0.34666 | ni     | conserved hypothetical protein                                                                            |
| 9c00086  | 0.43556 | ni     | FOG, Zn-finger                                                                        | um02242   | 0.34671 | K07566 | related to translation initiation protein SUA5                                                            |
| 3d00091  | 0.4356  | ni     | hypothetical protein                                                                  | um00423   | 0.34673 | K10364 | related to CAP1 - F-actin capping protein alpha subunit                                                   |
| 19c00149 | 0.43574 | ni     | hypothetical protein                                                                  | um01941   | 0.34681 | ni     | hypothetical protein                                                                                      |
| 22c00216 | 0.4358  | ni     | hypothetical protein                                                                  | um10298   | 0.34683 | ni     | putative protein                                                                                          |
| 7d00068  | 0.43588 | ni     | phosphatidic acid-preferring phospholipase A1                                         | um12308   | 0.34704 | ni     | conserved hypothetical protein                                                                            |
| 4d00024  | 0.43595 | K02936 | mitochondrial/chloroplast ribosomal protein S9                                        | um01359   | 0.34717 | ni     | conserved hypothetical protein                                                                            |
| 20c00057 | 0.43603 | ni     | zinc-binding protein of the histidine triad                                           | um05830   | 0.34719 | ni     | putative protein                                                                                          |
| 9d00346  | 0.43605 | K00249 | short-chain acyl-CoA dehydrogenase                                                    | um05846   | 0.34733 | ni     | probable MSH1 - DNA mismatch repair protein                                                               |
| 22c00048 | 0.43624 | ni     | hypothetical protein                                                                  | um10284   | 0.34741 | ni     | probable vacuolar sorting protein                                                                         |
| 13d00106 | 0.43638 | ni     | hypothetical protein                                                                  | um02989   | 0.34745 | ni     | related to IME4 - positive transcription factor for IME2                                                  |
| 7d00309  | 0.43644 | ni     | hypothetical protein                                                                  | um10500   | 0.34746 | ni     | hypothetical protein                                                                                      |
| 18c00067 | 0.43653 | K00211 | phenanthrene dehydrogenase                                                            | um02844   | 0.34747 | ni     | conserved hypothetical protein                                                                            |
| 15c00073 | 0.43688 | ni     | amphiphysin                                                                           | um02123   | 0.34764 | K06877 | conserved hypothetical protein                                                                            |
| 27d00019 | 0.43691 | K02320 | DNA polymerase alpha, catalytic subunit                                               | um01077.2 | 0.34773 | ni     | putative protein                                                                                          |
| 5c00072  | 0.43703 | K03036 | 26S proteasome regulatory complex, subunit RPN6/PSMD11                                | um01132   | 0.34773 | ni     | hypothetical protein                                                                                      |
| 6d00029  | 0.43715 | ni     | hypothetical protein                                                                  | um04118   | 0.34775 | ni     | conserved hypothetical Ustilago-specific protein                                                          |
| 16c00007 | 0.4373  | ni     | hypothetical protein                                                                  | um10535   | 0.34798 | K12863 | related to cell cycle control protein cw15                                                                |
| 12d00037 | 0.43736 | ni     | 5'-AMP-activated protein kinase, gamma subunit                                        | um02774   | 0.34812 | ni     | related to alternative oxidase precursor                                                                  |
| 19c00085 | 0.43754 | K14209 | amino acid transporters                                                               | um10146   | 0.34822 | K14753 | probable CPC2 protein                                                                                     |
| 7c00164  | 0.43778 | ni     | hypothetical protein                                                                  | um03431   | 0.34831 | ni     | conserved hypothetical protein                                                                            |
| 26d00002 | 0.43796 | K10209 | hypothetical protein                                                                  | um05101   | 0.34835 | K03163 | DNA topoisomerase I                                                                                       |
| 26d00115 | 0.43818 | ni     | hypothetical protein                                                                  | um10621   | 0.34838 | K02912 | probable 60S ribosomal protein L32                                                                        |
| 10c00037 | 0.43823 | K13509 | 1-acyl-sn-glycerol-3-phosphate acyltransferase                                        | um05053   | 0.34846 | ni     | conserved hypothetical protein                                                                            |
| 16d00059 | 0.43835 | ni     | hypothetical protein                                                                  | um02405   | 0.34847 | ni     | conserved hypothetical protein                                                                            |
| 12c00088 | 0.43836 | ni     | hypothetical protein                                                                  | um01278   | 0.34862 | ni     | conserved hypothetical protein                                                                            |
| 6c00047  | 0.43837 | K06693 | 26S proteasome regulatory complex, subunit PSMO9                                      | um03797   | 0.34876 | ni     | hypothetical protein                                                                                      |
| 10c00068 | 0.43842 | ni     | transferrin receptor and related proteins                                             | um10878   | 0.34885 | ni     | conserved hypothetical protein                                                                            |
| 6d00061  | 0.43853 | ni     | hypothetical protein                                                                  | um15092   | 0.34896 | K11227 | probable PBS2 - tyrosine protein kinase of the MAP kinase family                                          |
| 25d00064 | 0.43854 | ni     | hypothetical protein                                                                  | um01235   | 0.34821 | ni     | conserved hypothetical Ustilago-specific protein                                                          |
| 24c00001 | 0.43874 | ni     | non-ribosomal peptide synthetase                                                      | um03170   | 0.34943 | K13181 | related to DR51 - RNA helicase of the DEAD box family                                                     |
| 27d00094 | 0.4389  | ni     | hypothetical protein                                                                  | um03877   | 0.34943 | ni     | hypothetical protein                                                                                      |
| 15d00075 | 0.43884 | ni     | hypothetical protein                                                                  | um03437   | 0.34967 | K11684 | related to BDF1 - sporulation protein                                                                     |
| 14c00126 | 0.43888 | ni     | inner membrane protein required for assembly of the FO sector of                      | um00612   | 0.34972 | ni     | conserved hypothetical protein                                                                            |
| 22d00141 | 0.43894 | ni     | hypothetical protein                                                                  | um00602   | 0.34985 | K08286 | probable SCH9 - serine                                                                                    |
| 15d00040 | 0.43923 | K01641 | NAD <sup>+</sup> -ubiquitin-lyase/ubiquitin-ubiquitin synthase                        | um05228   | 0.34997 | K10839 | related to RAD23 - nucleotide excision repair protein                                                     |
| 28d00054 | 0.43957 | ni     | hypothetical protein                                                                  | um10901   | 0.35009 | ni     | probable polyubiquitin                                                                                    |
| 9d00097  | 0.43999 | ni     | hypothetical protein                                                                  | um06197   | 0.35017 | ni     | putative protein                                                                                          |
| 22c00262 | 0.44008 | ni     | hypothetical protein                                                                  | um10792   | 0.35029 | K01611 | related to S-adenosylmethionine decarboxylase                                                             |
| 24d00063 | 0.4401  | ni     | mitochondrial F <sub>1</sub> F <sub>0</sub> transporter MMT1 and related transporters | um03043   | 0.35043 | ni     | conserved hypothetical protein                                                                            |
| 6c00049  | 0.44023 | ni     | hypothetical protein                                                                  | um10558   | 0.35044 | ni     | probable tubulin beta chain                                                                               |
| 11c00085 | 0.44031 | K00700 | 1,4-alpha-glucan branching enzyme/starch branching enzyme II                          | um00668   | 0.35044 | ni     | related to SIP2 - subunit of the Snf1 serine                                                              |
| 8d00113  | 0.44049 | ni     | FOG, Zn-finger                                                                        | um04465   | 0.35049 | K11359 | related to transcription regulator SP17                                                                   |
| 3000044  | 0.44069 | ni     | TPR repeat-containing protein                                                         | um02152   | 0.35054 | K15015 | related to amino acid transport protein                                                                   |
| 22d00287 | 0.44092 | ni     | protein carbonylase dehydratase PCBD                                                  | um15072   | 0.35078 | ni     | related to SUR1 - required for mannosylation of sphingolipids                                             |
| 16c00090 | 0.44092 | ni     | hypothetical protein                                                                  | um05862   | 0.3509  | K06053 | conserved hypothetical protein                                                                            |
| 4c00002  | 0.44094 | K03144 | RNA polymerase II transcription initiation/nucleotide excision rep                    | um02320   | 0.35095 | ni     | conserved hypothetical protein                                                                            |
| 5d00080  | 0.44147 | ni     | spliceosome subunit                                                                   | um12019   | 0.35117 | K12879 | related to RLR1 - Subunit of the THO complex                                                              |
| 11c00001 | 0.44174 | ni     | multidrug resistance-associated protein                                               | um04336   | 0.35117 | ni     | conserved hypothetical protein                                                                            |
| 15d00022 | 0.44187 | ni     | hypothetical protein                                                                  | um02395   | 0.35117 | ni     | related to ferric reductase                                                                               |
| 12c00017 | 0.44198 | ni     | membrane coat complex Retromer, subunit VPSS/SNX1                                     | um11709   | 0.35126 | ni     | hypothetical protein                                                                                      |
| 9c00389  | 0.44208 | K14789 | FOG, RRM domain                                                                       | um11268   | 0.35129 | K00528 | related to NADPH                                                                                          |
| 20c00007 | 0.44212 | K14692 | putative Zn <sup>2+</sup> transporter MSC2                                            | um04174   | 0.35136 | ni     | conserved hypothetical protein                                                                            |
| 12d00131 | 0.44219 | ni     | hypothetical protein                                                                  | um06158   | 0.35142 | ni     | probable glutaminase A                                                                                    |
| 16c00014 | 0.44223 | K02731 | 20S proteasome, regulatory subunit alpha type PSMA7/PRE6                              | um02794   | 0.35144 | K06993 | related to 26S proteasome non-ATPase regulatory subunit 9                                                 |
| 9c00080  | 0.44242 | ni     | arylalkylamine N-acetyltransferase                                                    | um11525   | 0.35152 | K04382 | protein phosphatase 2A                                                                                    |
| 12d00098 | 0.44243 | K03950 | NAD <sup>+</sup> -ubiquinone oxidoreductase, NDUFA6/B14 subunit                       | um11388   | 0.3516  | ni     | conserved hypothetical protein                                                                            |
| 22d00281 | 0.44244 | ni     | hypothetical protein                                                                  | um06148   | 0.35176 | ni     | conserved hypothetical protein                                                                            |
| 6c00127  | 0.44247 | ni     | predicted gamma-butyrobetaine,2-oxoglutarate dioxygenase                              | um02305   | 0.35187 | ni     | related to peptidyl-prolyl cis-trans isomerase                                                            |
| 11d00086 | 0.44277 | ni     | alcohol dehydrogenase                                                                 | um10911   | 0.35191 | K10661 | conserved hypothetical protein                                                                            |
| 8c00083  | 0.44288 | K17263 | TATA-binding protein-interacting protein                                              | um04593   | 0.35194 | ni     | conserved hypothetical protein                                                                            |
| 7d00353  | 0.44292 | K13108 | transcriptional regulator SNP1                                                        | um10142   | 0.35197 | K14397 | probable CF25 - polyadenylation factor                                                                    |
| 9c00107  | 0.44292 | K03249 | translational initiation factor 3, subunit I                                          | um06175   | 0.35212 | K09540 | related to SEC3E - ER protein-translocation complex subunit                                               |
| 19c00067 | 0.44293 | ni     | predicted N6-adenine RNA methylase                                                    | um04242   | 0.35221 | ni     | conserved hypothetical protein                                                                            |
| 14c00078 | 0.44307 | K02969 | 40S ribosomal protein S20                                                             | um05927   | 0.3523  | ni     | conserved hypothetical Ustilago-specific protein                                                          |
| 22d00243 | 0.44337 | ni     | hypothetical protein                                                                  | um03262   | 0.35235 | ni     | hypothetical protein                                                                                      |
| 10d00045 | 0.44343 | K12236 | transcription factor NF-X1                                                            | um11672   | 0.35245 | K05955 | related to Protein farnesyltransferase alpha subunit                                                      |
| 6c00110  | 0.4435  | ni     | hypothetical protein                                                                  | um01262   | 0.35246 | K02330 | DNA polymerase X - putative                                                                               |
| 8d00032  | 0.44378 | ni     | synaptic vesicle transporter SVOP and related transporters                            | um03565   | 0.35248 | K14575 | related to AFG2 - ATPase of the CDC48                                                                     |
| 19c00135 | 0.44388 | K10579 | ubiquitin-protein ligase                                                              | um03738   | 0.35255 | K12854 | probable ATP dependent RNA helicase                                                                       |
| 9c00181  | 0.4439  | ni     | magnesium-dependent phosphatase                                                       | um11064   | 0.35271 | ni     | conserved hypothetical protein                                                                            |
| 15       |         |        |                                                                                       |           |         |        |                                                                                                           |

|          |         |        |                                                               |           |         |                                                              |                                                                                            |
|----------|---------|--------|---------------------------------------------------------------|-----------|---------|--------------------------------------------------------------|--------------------------------------------------------------------------------------------|
| 7c00068  | 0.44691 | ni     | hypothetical protein                                          | um04136   | 0.3541  | K08286                                                       | related to serine                                                                          |
| 7c00196  | 0.44692 | K17402 | hypothetical protein                                          | um04668   | 0.3542  | K03593                                                       | related to nucleotide-binding protein NBP35                                                |
| 9d00118  | 0.44700 | K12668 | cyclin D-interacting protein GCJP                             | um05087   | 0.35431 | ni                                                           | conserved hypothetical protein                                                             |
| 13c0050  | 0.44716 | K00693 | 3-phosphoglycerate 5-phosphosulfate sulfoltransferase         | um01619   | 0.35431 | K00111                                                       | related to GLT2 - glyceral-3-phosphate dehydrogenase                                       |
| 22c00279 | 0.44725 | ni     | permease of the major facilitator superfamily                 | um03464   | 0.35434 | ni                                                           | conserved hypothetical protein                                                             |
| 5a00129  | 0.44734 | K06111 | exocyst complex subunit Sec8                                  | um02623   | 0.35441 | ni                                                           | conserved hypothetical protein                                                             |
| 7c00105  | 0.44735 | K14771 | predicted nucleolar protein                                   | um11675   | 0.35454 | ni                                                           | conserved hypothetical protein                                                             |
| 14d00116 | 0.44742 | K06675 | struc1422: a member of chromosome protein 4                   | um05337   | 0.35463 | K14807                                                       | related to DfnsP - ATP-dependent RNA helicase                                              |
| 5000043  | 0.44755 | ni     | HMG-box nif protein                                           | um05025   | 0.35467 | K11805                                                       | related to human and petunia an11 protein                                                  |
| 5c00126  | 0.44756 | K14016 | ubiquitin fusion-degradation protein                          | um01843   | 0.35472 | ni                                                           | probable acetyl-CoA C-acyltransferase precursor                                            |
| 7c00092  | 0.44762 | K01176 | alpha-amylose                                                 | um05937   | 0.35477 | ni                                                           | Putative Cys                                                                               |
| 3c00022  | 0.44726 | ni     | hypothetical protein                                          | um04236   | 0.35488 | K00231                                                       | related to ribose-phosphate diphosphokinase catalytic chain I                              |
| 11c00051 | 0.44767 | K09500 | chaperonin complex component, TCP-1 theta subunit             | um10713.2 | 0.35514 | ni                                                           | conserved hypothetical protein                                                             |
| 13c00091 | 0.44771 | ni     | negative regulator of COPII vesicle formation                 | um11135   | 0.35519 | K02978                                                       | probable 40S ribosomal protein S27                                                         |
| 9c00072  | 0.44771 | ni     | predicted phosphoglucomannose acetyltransferase               | um11200   | 0.35527 | ni                                                           | conserved hypothetical protein                                                             |
| 2a00017  | 0.44774 | ni     | hypothetical protein                                          | um12314   | 0.35531 | ni                                                           | putative protein                                                                           |
| 14c00052 | 0.44781 | K06686 | WD40 repeat-containing protein                                | um05376   | 0.35535 | ni                                                           | putative protein                                                                           |
| 10d00116 | 0.44831 | ni     | FOG_RCC1 domain                                               | um01117   | 0.35558 | ni                                                           | conserved hypothetical protein                                                             |
| 16d00085 | 0.44836 | K00135 | aldehyde dehydrogenase                                        | um04371   | 0.35563 | K15026                                                       | conserved hypothetical protein                                                             |
| 2a00005  | 0.44845 | K03238 | translocation initiation factor 2, beta subunit               | um02804   | 0.35577 | ni                                                           | conserved hypothetical protein                                                             |
| 12d00119 | 0.44947 | K09602 | uncharacterized conserved protein                             | um04901   | 0.35581 | ni                                                           | related to CK11 - choline kinase                                                           |
| 15c00060 | 0.44982 | ni     | hypothetical protein                                          | um10179   | 0.35593 | ni                                                           | conserved hypothetical protein                                                             |
| 7c00244  | 0.44988 | ni     | transcription factor of the Forkhead/HNF3 family              | um11410   | 0.35596 | K12765                                                       | cdk-related kinase 1                                                                       |
| 27c00065 | 0.44972 | K04705 | signal transducing adaptor protein STAM/STAM2                 | um12292   | 0.356   | ni                                                           | hypothetical protein                                                                       |
| 22d00228 | 0.44977 | ni     | hypothetical protein                                          | um04925   | 0.3563  | K00916                                                       | related to CTK1 - carboxy-terminal domain                                                  |
| 3d00079  | 0.45087 | K10742 | DNA replication helicase                                      | um06380   | 0.35637 | K03948                                                       | related to ribose-phosphate diphosphokinase catalytic chain I                              |
| 9c00067  | 0.449   | K06978 | hypothetical protein                                          | um11840   | 0.35674 | K14998                                                       | related to Surfeit locus protein 1                                                         |
| 9c00257  | 0.44906 | K00601 | 5-phosphoribosylglycinamide formyltransferase                 | um11379   | 0.35675 | ni                                                           | putative protein                                                                           |
| 15d00053 | 0.4492  | K01834 | phosphoglycerate mutase                                       | um11429   | 0.35686 | ni                                                           | conserved hypothetical protein                                                             |
| 8c00081  | 0.44921 | K05012 | cl-channel CLC-3 and related proteins                         | um02778   | 0.35694 | ni                                                           | related to aspartic protease                                                               |
| 6d00053  | 0.44929 | ni     | NxifH antiporter                                              | um03937   | 0.35698 | K17439                                                       | probable MRPL56 - mitochondrial ribosomal protein                                          |
| 26d00062 | 0.44941 | ni     | hypothetical protein                                          | um11695   | 0.3571  | K01735                                                       | related to 2-epi-5-epi-valiolone synthase                                                  |
| 27d00045 | 0.44947 | ni     | thioredoxin-like protein                                      | um04934   | 0.35729 | K14793                                                       | related to RRP9 - protein associated with the U3 small nuclear RNA                         |
| 13d00060 | 0.44956 | ni     | cytoplasmic Zn-finger protein BRAP2                           | um01150   | 0.3574  | ni                                                           | related to COX7 - cytochrome-c oxidase                                                     |
| 22c00008 | 0.44959 | ni     | para-hydroxybenzoate polyprenyl transferase                   | um10302.2 | 0.35744 | ni                                                           | conserved hypothetical protein                                                             |
| 7d00035  | 0.44963 | K05909 | multicopper oxidases                                          | um01408   | 0.35797 | ni                                                           | probable MCA1 - Metacaspase                                                                |
| 9c00326  | 0.44979 | K05663 | mitochondrial Fe/S cluster exporter                           | um05569   | 0.35806 | K07443                                                       | related to methylated-dna-protein-cysteine methyltransferase                               |
| 19c00054 | 0.44989 | ni     | thioredoxin-like protein                                      | um12159   | 0.35818 | ni                                                           | conserved hypothetical protein                                                             |
| 9d00092  | 0.44998 | ni     | hypothetical protein                                          | um11698   | 0.35843 | K10752                                                       | probable Chromatin assembly factor 1 subunit c                                             |
| 24c00024 | 0.45001 | K06639 | protein tyrosine phosphatase CDC14                            | um00318   | 0.35882 | K14615                                                       | related to MRT4 - protein involved in mRNA turnover                                        |
| 14d00076 | 0.45002 | ni     | voltage-gated shaker-like K+ channel, subunit beta/KCNAB      | um04316   | 0.35871 | ni                                                           | hypothetical protein                                                                       |
| 5c00158  | 0.45035 | ni     | hypothetical protein                                          | um05767   | 0.35883 | ni                                                           | related to ATP-dependent RNA helicase                                                      |
| 16c00009 | 0.45035 | ni     | hypothetical protein                                          | um10459   | 0.35889 | K03063                                                       | probable RPT3 - 26S proteasome regulatory subunit                                          |
| 13c00029 | 0.45053 | K14838 | nucleolar RNA-binding protein NIFK                            | um01734   | 0.35922 | K101227                                                      | related to Endo-N-acetylglucosaminidase                                                    |
| 11c00013 | 0.45073 | ni     | hypothetical protein                                          | um01734   | 0.35925 | ni                                                           | hypothetical protein                                                                       |
| 20c00070 | 0.45076 | K02503 | zinc-binding protein of the histidine triad                   | um04892   | 0.35933 | ni                                                           | hypothetical protein                                                                       |
| 5c00070  | 0.45078 | ni     | hypothetical protein                                          | um04217   | 0.35942 | ni                                                           | conserved hypothetical protein                                                             |
| 22c00032 | 0.45089 | K10426 | dynactin, subunit p62                                         | um12168   | 0.35945 | ni                                                           | hypothetical protein                                                                       |
| 26d00014 | 0.45112 | ni     | hypothetical protein                                          | um04970   | 0.35949 | K08869                                                       | conserved hypothetical protein                                                             |
| 20d00070 | 0.45137 | K05658 | multidrug/pheromone exporter                                  | um05064   | 0.35955 | K02209                                                       | probable CDC46 - cell division control protein                                             |
| 7c00060  | 0.45147 | ni     | glutathione S-transferase                                     | um02462   | 0.35991 | ni                                                           | conserved hypothetical protein                                                             |
| 13c00012 | 0.45152 | ni     | predicted protein tyrosine phosphatase                        | um11350.2 | 0.35996 | K01908                                                       | related to acetyl coenzyme A synthetase                                                    |
| 15d00013 | 0.45158 | K09527 | molef58 protein                                               | um02352   | 0.36013 | K02997                                                       | probable 60S ribosomal protein S9                                                          |
| 13c00111 | 0.45158 | K02868 | 60S ribosomal protein L11                                     | um11990   | 0.36016 | ni                                                           | putative protein                                                                           |
| 15d00060 | 0.45159 | ni     | hypothetical protein                                          | um05548   | 0.36019 | ni                                                           | related to L-ascorbate oxidase precursor                                                   |
| 26d00086 | 0.45165 | K15326 | predicted tRNA-splicing endonuclease subunit                  | um02523   | 0.36035 | ni                                                           | related to Endoglycanase 1 precursor                                                       |
| 8d00084  | 0.45167 | K05298 | glycylphosphatidylinositol anchor synthesis protein           | um03946   | 0.36035 | ni                                                           | putative protein                                                                           |
| 22d00294 | 0.45196 | K00876 | hypothetical protein                                          | um03011   | 0.36118 | ni                                                           | conserved hypothetical protein                                                             |
| 26c00044 | 0.45198 | ni     | hypothetical protein                                          | um10658   | 0.36125 | ni                                                           | related to component of the spindle assembly checkpoint dma1                               |
| 7d00239  | 0.45206 | ni     | hypothetical protein                                          | um10842   | 0.36126 | K02866                                                       | probable RPL10 - 60S large subunit ribosomal protein L10                                   |
| 27d00086 | 0.45214 | ni     | CDC42 Rho GTPase-activating protein                           | um05642   | 0.36132 | ni                                                           | probable SNQ2 - ABC transporter involved in multidrug resistance                           |
| 19c0148  | 0.45215 | K01969 | 3-hydroxyacyl-CoA carboxylase, non-biotin containing subunit  | um03946   | 0.36132 | K05607                                                       | probable methionyl-tRNA-coa hydratase                                                      |
| 5c00130  | 0.45224 | K15202 | RNA polymerase III transcription factor (TF)IIIC subunit      | um10918   | 0.36166 | ni                                                           | Brd2-interacting protein Dss1                                                              |
| 15c00096 | 0.45245 | ni     | hypothetical protein                                          | um03265   | 0.36169 | ni                                                           | putative protein                                                                           |
| 22c00239 | 0.45246 | ni     | hypothetical protein                                          | um10582.2 | 0.36187 | K06889                                                       | conserved hypothetical protein                                                             |
| 22c00156 | 0.45246 | ni     | hypothetical protein                                          | um01310   | 0.36204 | K14766                                                       | related to NUP14 - nuclear and nucleolar protein with possible role in ribosome biogenesis |
| 15d00068 | 0.45249 | ni     | protein involved in vacuolar protein sorting                  | um02575   | 0.36216 | ni                                                           | related to toxJ gene                                                                       |
| 15c00093 | 0.45282 | ni     | hypothetical protein                                          | um00193   | 0.36224 | ni                                                           | conserved hypothetical protein                                                             |
| 13c00034 | 0.45286 | ni     | HSP90 co-chaperone p23                                        | um10492   | 0.36229 | ni                                                           | hypothetical protein                                                                       |
| 9c00103  | 0.4529  | ni     | hypothetical protein                                          | um02968   | 0.36243 | K12620                                                       | related to LSM1 - Sm-like                                                                  |
| 19c0006  | 0.45333 | ni     | hypothetical protein                                          | um05168   | 0.36252 | ni                                                           | conserved hypothetical protein                                                             |
| 11d00083 | 0.45336 | ni     | hypothetical protein                                          | um06212   | 0.36254 | K15161                                                       | related to SSN8 - DNA-directed RNA polymerase II holoenzyme and SRB subcomplex subunit     |
| 24d00040 | 0.45342 | K02938 | 60s ribosomal protein L2L8                                    | um10325   | 0.36256 | ni                                                           | putative protein                                                                           |
| 27d00072 | 0.45344 | K02877 | 60s ribosomal protein L15                                     | um06329   | 0.36269 | K00721                                                       | dolichyl-phosphate beta-D-mannosyltransferase                                              |
| 3d00038  | 0.4535  | ni     | hypothetical protein                                          | 0.36272   | K07152  | probable SCO1 - involved in stabilization of Cox1p and Cox2p |                                                                                            |
| 11d00058 | 0.45358 | K02967 | mitochondrial/choroplast ribosomal protein S2                 | um03708.2 | 0.36288 | ni                                                           | related to gata transcription factor                                                       |
| 7c00037  | 0.45395 | K12862 | pleiotropic regulator 1                                       | um00242   | 0.36315 | K14805                                                       | related to MAK5 - ATP-dependent RNA helicase                                               |
| 22d00254 | 0.45403 | ni     | acyl-coa synthetase                                           | um00061   | 0.36323 | ni                                                           | related to quinate transport protein                                                       |
| 7c00295  | 0.45419 | K07442 | tRNA-1-methyladenosine methyltransferase, subunit GCDD14      | um02840   | 0.36325 | ni                                                           | related to CHS5 - chitin biosynthesis protein                                              |
| 13d00151 | 0.45431 | K15292 | vesicle trafficking protein Sec1                              | um04296   | 0.36325 | K11338                                                       | probable RVB2 - RUVB-like protein                                                          |
| 24d00055 | 0.45449 | ni     | hypothetical protein                                          | um02003   | 0.36351 | ni                                                           | hypothetical protein                                                                       |
| 13c00068 | 0.45451 | ni     | hypothetical protein                                          | um02310   | 0.36368 | ni                                                           | putative protein                                                                           |
| 22c00070 | 0.45473 | ni     | hypothetical protein                                          | um04310   | 0.36399 | K12736                                                       | related to Peptidylprolyl isomerase domain and WD repeat-containing protein 1              |
| 7c00283  | 0.45473 | ni     | hypothetical protein                                          | um05783   | 0.36418 | K15272                                                       | related to UDP-galactose transporter                                                       |
| 9c00010  | 0.45474 | ni     | hypothetical protein                                          | um11196   | 0.36422 | K10747                                                       | probable CDC3 - DNA ligase I                                                               |
| 22d00128 | 0.45482 | K14284 | mRNA export factor TAP/MEX67                                  | um00256   | 0.36423 | ni                                                           | related to 3-oxoacyl-                                                                      |
| 25c00065 | 0.45532 | ni     | hypothetical protein                                          | um10774   | 0.3644  | ni                                                           | conserved hypothetical Ustilago-specific protein                                           |
| 12d00054 | 0.45536 | ni     | hypothetical protein                                          | um06183   | 0.36441 | ni                                                           | related to RNA-binding protein mp24                                                        |
| 6c00072  | 0.45547 | K02295 | deoxyribonucleic acid photolyase                              | um01322   | 0.36476 | ni                                                           | hypothetical protein                                                                       |
| 12d00078 | 0.45571 | ni     | hypothetical protein                                          | um06398   | 0.36478 | ni                                                           | related to calcineurin temperature suppressor cts1                                         |
| 22c00133 | 0.45579 | ni     | proteins containing armadillo/beta-catenin-like repeat        | um03494   | 0.36479 | K13126                                                       | mRNA polyadenylate-binding protein PAB1                                                    |
| 18c00055 | 0.45583 | ni     | hypothetical protein                                          | um04820   | 0.36485 | ni                                                           | related to ITC1 - subunit of lsw2 chromatin remodelling complex                            |
| 13c00061 | 0.45604 | ni     | hypothetical protein                                          | um02814   | 0.365   | ni                                                           | hypothetical protein                                                                       |
| 13d00107 | 0.45604 | ni     | GAT-A-4/6 transcription factors                               | um03533   | 0.36537 | K02894                                                       | probable RPL24 - 60S large subunit ribosomal protein L23                                   |
| 6c00045  | 0.45606 | ni     | methyltransferase                                             | um03748   | 0.3655  | ni                                                           | conserved hypothetical Ustilago-specific protein                                           |
| 5a00144  | 0.45622 | ni     | amidases                                                      | um11198   | 0.36577 | K11126                                                       | conserved hypothetical protein                                                             |
| 19c00031 | 0.45626 | ni     | predicted mRNA cap-binding protein related to eIF-4E          | um04032   | 0.36596 | ni                                                           | probable beta-glucosidase                                                                  |
| 20c00014 | 0.45631 | ni     | chitin synthetase                                             | um02125   | 0.36592 | ni                                                           | conserved hypothetical protein                                                             |
| 10d00089 | 0.45681 | K13115 | CC2C-type Zn-finger protein                                   | um10296   | 0.36592 | K02267                                                       | probable COX12 - cytochrome-c oxidase                                                      |
| 2a00054  | 0.45701 | ni     | late Golgi protein sorting complex, subunit Vps53             | um06393   | 0.36612 | K12729                                                       | related to YOP1 - Ypt-interacting protein                                                  |
| 11c00047 | 0.45716 | ni     | hypothetical protein                                          | um12340   | 0.36616 | ni                                                           | related to C-4 methylsterol oxidase                                                        |
| 9d00148  | 0.45719 | K12825 | splicing factor 3a, subunit 1                                 | um01754   | 0.36642 | ni                                                           | putative protein                                                                           |
| 9d00008  | 0.45726 | ni     | molecular chaperone                                           | um10135   | 0.36668 | K10768                                                       | conserved hypothetical protein                                                             |
| 14c00099 | 0.45746 | ni     | hypothetical protein                                          | um00534   | 0.36665 | ni                                                           | conserved hypothetical protein                                                             |
| 27d00076 | 0.45762 | ni     | hypothetical protein                                          | um01456   | 0.36667 | ni                                                           | ni                                                                                         |
| 12d00060 | 0.45777 | K11883 | predicted RNA-binding protein Nob1p involved in 26S proteasom | um12342   | 0.36708 | ni                                                           | conserved hypothetical protein                                                             |
| 8d00102  | 0.45779 | ni     | hypothetical protein                                          | um00300   | 0.3671  | ni                                                           | related to Glutathinyl-peptide cyclotransferase precursor                                  |
| 9c00230  | 0.45781 | ni     | aldoketo reductase family proteins                            | um05505   | 0.3674  | K15153                                                       | related to mediator complex subunit soh1                                                   |
| 24d00008 | 0.45803 | ni     | hypothetical protein                                          | um05404.2 | 0.36762 | ni                                                           | related to conserved oligomeric Golgi complex component 3                                  |
| 4c00043  | 0.45813 | K07124 | 17-beta-hydroxysteroid dehydrogenase type 3                   | um11822   | 0.36781 | K02871                                                       | probable MRPL23 - mitochondrial ribosomal protein                                          |
| 12c00044 | 0.45814 | ni     | predicted methyltransferase                                   | um00588   | 0.36787 | ni                                                           | hypothetical protein                                                                       |
| 15c0008  | 0.45819 | K11495 | histones H3 and H4                                            | um11328   | 0.36796 | ni                                                           | conserved hypothetical protein                                                             |
| 1c00029  | 0.45839 | ni     | arp2/3 complex-interacting protein VIP1/Asp1                  | um10702   | 0.368   | K02940                                                       | probable RPL9A - ribosomal protein L9                                                      |
| 11d00008 | 0.45867 | ni     | hypothetical protein                                          | um04485   | 0.3681  | ni                                                           | related to Cut9 interacting protein scn1                                                   |
| 19d00008 | 0.45879 | ni     | hypothetical protein                                          | um11729   | 0.36829 | ni                                                           | putative protein                                                                           |
| 5a00121  | 0.4589  | K00698 | chitin synthetase/hyaluronan synthase                         | um11512   | 0.36838 | K08827                                                       | related to mRNA splicing-associated serine-threonine protein kinase                        |
| 10d00002 | 0.45909 | K14557 | HAT (Hail-A-TPR) repeat-containing protein                    | um11725   | 0.36859 | K14563                                                       | conserved hypothetical protein                                                             |
| 24d00049 | 0.45938 | ni     | hypothetical protein                                          | um01361   | 0.36862 | ni                                                           | hypothetical protein                                                                       |
| 27d00053 | 0.4594  | ni     | hypothetical protein                                          | um00575   | 0.36871 | K11675                                                       | related to IES1 - Subunit 1 of the INO80 chromatin remodeling complex                      |
| 3c00023  | 0.45955 | ni     | hypothetical protein                                          | um03216   | 0.36891 | K07203                                                       | probable TOR1 - 1-phosphatidylinositol 3-kinase                                            |
| 13d00105 | 0.45959 | ni     | vacuolar assembly-sorting protein VPS16                       | um11782   | 0.36892 | ni                                                           | putative protein                                                                           |
| 9c00049  | 0.45982 | ni     | hypothetical protein                                          | um10194   | 0.36915 | K03115                                                       | related to CKB1 - casein kinase II                                                         |
| 5a00143  | 0.45982 | K02921 | 60S ribosomal protein L37                                     | um01031   | 0.36916 | ni                                                           | conserved hypothetical protein                                                             |
| 14d00005 | 0.45983 | K14818 | angio-associated migratory cell protein                       | um04624   | 0.36918 | K14304                                                       | conserved hypothetical protein                                                             |
| 4c00044  | 0.45993 | ni     | hypothetical protein                                          | um06295   | 0.36921 | ni                                                           | related to dolichyl-phosphate-mannose-glycolipid alpha-mannosyltransferase                 |
| 10d00064 | 0.46001 | K10300 | 3'-5' DNA helicase                                            | um01175   | 0.36922 | K03514                                                       | related to TRF4 - topoisomerase I-related protein                                          |
| 20d00053 | 0.46004 | K01265 | metallopeptidase                                              | um01123   | 0.3693  | K11373                                                       | related to IK3 - Subunit of RNA polymerase II elongator histone acetyltransferase complex  |
| 3a00094  | 0.46012 | ni     | hypothetical protein                                          | um15022.2 | 0.36931 | K12893                                                       | related to pre-mrna splicing factor srp55                                                  |
| 27d00056 | 0.46033 | ni     | leucine permease transcriptional regulator                    | um02027   | 0.36933 | ni                                                           | related to glutamate carboxypeptidase II                                                   |
| 15c00075 | 0.46033 | K12623 | small nuclear ribonucleoprotein                               | um03001   | 0.36945 | ni                                                           | putative protein                                                                           |
| 26d00049 | 0.46048 | K03124 | transcription initiation factor TFIIB                         | um11715   | 0.36948 | ni                                                           | related to VPS13 - involved in regulating membrane traffic                                 |
| 2c00048  | 0.46051 | K17086 | endosomal membrane proteins, EMP70                            | um04995   | 0.36951 | ni                                                           | conserved hypothetical protein                                                             |
| 27c0001  |         |        |                                                               |           |         |                                                              |                                                                                            |

|          |         |        |                                                                         |           |         |        |                                                                                                        |
|----------|---------|--------|-------------------------------------------------------------------------|-----------|---------|--------|--------------------------------------------------------------------------------------------------------|
| 14d00077 | 0.46329 | ni     | cylophilin-type peptidyl-prolyl cis-trans isomerase                     | um00057   | 0.37225 | ni     | conserved hypothetical protein                                                                         |
| 16c00089 | 0.46369 | ni     | uncharacterized conserved protein                                       | um12206   | 0.3724  | ni     | conserved hypothetical protein                                                                         |
| 15c00004 | 0.46371 | ni     | uncharacterized conserved protein                                       | um03718   | 0.37246 | ni     | ni                                                                                                     |
| 27d00035 | 0.46386 | ni     | predicted transporter                                                   | um04591   | 0.3726  | K12571 | related to PAN2 - component of Pab1p-stimulated poly                                                   |
| 18d00099 | 0.46398 | ni     | hypothetical protein                                                    | um03411   | 0.37261 | K01181 | probable endo-                                                                                         |
| 9c00130  | 0.46405 | K15542 | polyadenylation factor I complex, subunit PFS2                          | um01539   | 0.37263 | ni     | hypothetical protein                                                                                   |
| 3c00004  | 0.46418 | ni     | hypothetical protein                                                    | um02453   | 0.3728  | K04564 | probable SOD2 - superoxide dismutase                                                                   |
| 9c00045  | 0.46425 | K03964 | glycosyltransferase                                                     | um05339   | 0.37282 | ni     | conserved hypothetical protein                                                                         |
| 6d00033  | 0.46443 | ni     | hypothetical protein                                                    | um01372   | 0.37282 | K14538 | related to nuclear GTPase                                                                              |
| 22d00096 | 0.46448 | K02902 | mitochondrial/chloroplast ribosomal protein L2                          | um05833   | 0.37291 | K16576 | conserved hypothetical protein                                                                         |
| 9c00302  | 0.46456 | ni     | uncharacterized conserved protein                                       | um00337   | 0.37312 | ni     | hypothetical protein                                                                                   |
| 22d00274 | 0.46457 | ni     | predicted N6-DNA-methyltransferase                                      | um03641   | 0.37344 | ni     | ni                                                                                                     |
| 10d00076 | 0.46471 | K01251 | S-adenosylhomocysteine hydrolase                                        | um06154   | 0.37344 | ni     | hypothetical protein                                                                                   |
| 7c00008  | 0.46473 | ni     | hypothetical protein                                                    | um03863   | 0.37344 | K03006 | probable RPO21 - DNA-directed RNA polymerase II                                                        |
| 9d00008  | 0.46484 | K14826 | FKBP-type peptidyl-prolyl cis-trans isomerase                           | um06384   | 0.37355 | ni     | hypothetical protein                                                                                   |
| 20c00049 | 0.46485 | K01770 | uncharacterized conserved protein                                       | um05725   | 0.3736  | K00550 | probable OPI3 - methylene-fatty-acyl-phospholipid synthase                                             |
| 2c00064  | 0.46486 | K03844 | glycosyltransferase                                                     | um11469   | 0.37406 | K07952 | related to ARL5 - ADP-ribosylation factor-like protein                                                 |
| 7c00147  | 0.46509 | ni     | uncharacterized conserved protein                                       | um04779   | 0.37414 | ni     | conserved hypothetical protein                                                                         |
| 10d00087 | 0.46514 | ni     | hypothetical protein                                                    | um10731   | 0.37416 | K13337 | related to PEX19 - required for biogenesis of peroxisomes                                              |
| 11c00072 | 0.46516 | K05658 | multidrug/phenone exporter                                              | um11677.2 | 0.37438 | K12767 | related to serine                                                                                      |
| 9d00395  | 0.46516 | ni     | hypothetical protein                                                    | um11521   | 0.37448 | K03575 | related to A                                                                                           |
| 7d00243  | 0.46539 | K08333 | rhogt GTPase                                                            | um02886   | 0.37456 | ni     | putative protein                                                                                       |
| 24d00016 | 0.46548 | K08489 | SNARE protein TLG2                                                      | um02083   | 0.37462 | K10875 | probable RAD54 - DNA-dependent ATPase of the Srf2p family                                              |
| 9d00401  | 0.46553 | ni     | acyl-coa synthetase                                                     | um05758   | 0.37469 | ni     | related to HST4 - member of the Sir2p family of NAD                                                    |
| 7d00064  | 0.46558 | ni     | hypothetical protein                                                    | um10938   | 0.37492 | ni     | probable NADP-dependent mannitol dehydrogenase                                                         |
| 9d00044  | 0.46567 | K00761 | arabinose                                                               | um04859   | 0.37492 | ni     | putative protein                                                                                       |
| 12d00022 | 0.46581 | K01090 | serine/threonine protein phosphatase                                    | um11120   | 0.37494 | ni     | conserved hypothetical protein                                                                         |
| 9c00199  | 0.46598 | ni     | uncharacterized conserved protein                                       | um06458   | 0.37494 | ni     | conserved hypothetical protein                                                                         |
| 7c00104  | 0.46606 | ni     | hypothetical protein                                                    | um01974   | 0.37499 | K15979 | conserved hypothetical protein                                                                         |
| 18d00103 | 0.4661  | ni     | hypothetical protein                                                    | um02552   | 0.375   | ni     | conserved hypothetical protein                                                                         |
| 9c00138  | 0.46619 | ni     | hypothetical protein                                                    | um11029   | 0.37504 | K02946 | related to WH2 - growth regulation protein                                                             |
| 7d00022  | 0.46628 | K10747 | ATP-dependent DNA ligase I                                              | um00788   | 0.37513 | ni     | conserved hypothetical protein                                                                         |
| 27c00082 | 0.46636 | K10418 | dynein light chain type 1                                               | um10243   | 0.37522 | K11885 | related to DNA-damage inducible protein 2                                                              |
| 9d00398  | 0.46642 | ni     | hypothetical protein                                                    | um10269   | 0.37532 | ni     | conserved hypothetical protein                                                                         |
| 18c00086 | 0.46643 | ni     | hypothetical protein                                                    | um01957   | 0.37536 | K12618 | probable KEN1 - 5                                                                                      |
| 8c00099  | 0.4665  | ni     | hypothetical protein                                                    | um15023   | 0.37537 | K02677 | probable protein kinase C                                                                              |
| 9c00310  | 0.46705 | K03035 | 26S proteasome regulatory complex, subunit RPN5/PSMD12                  | um03612   | 0.37555 | ni     | conserved hypothetical protein                                                                         |
| 22c00157 | 0.4671  | ni     | hypothetical protein                                                    | um03874   | 0.37572 | ni     | conserved hypothetical protein                                                                         |
| 7d00315  | 0.4674  | ni     | hypothetical protein                                                    | um02722   | 0.37585 | ni     | hypothetical protein                                                                                   |
| 3c000078 | 0.46767 | ni     | transcription factor of the Forkhead/HNF3 family                        | um01360   | 0.37589 | ni     | related to SNE4 - nuclear regulatory protein                                                           |
| 12d00096 | 0.46775 | ni     | hypothetical protein                                                    | um00391.2 | 0.376   | ni     | conserved hypothetical protein                                                                         |
| 18c00043 | 0.46783 | ni     | hypothetical protein                                                    | um04523   | 0.37601 | K03320 | low affinity ammonium transporter                                                                      |
| 12d00118 | 0.46786 | ni     | COP1 vesicle protein                                                    | um03227   | 0.3766  | K11800 | probable exosome complex exonuclease rrp41                                                             |
| 22d00014 | 0.46792 | ni     | hypothetical protein                                                    | um11898   | 0.37666 | K02880 | probable RPL17A - ribosomal protein L17                                                                |
| 18d00051 | 0.46794 | ni     | hypothetical protein                                                    | um10949   | 0.37695 | ni     | conserved hypothetical protein                                                                         |
| 9d00024  | 0.46804 | ni     | hypothetical protein                                                    | um01296   | 0.37705 | K14571 | related to RIX7 - AAA-type ATPase required for biogenesis and nuclear export of 60S ribosomal subunits |
| 7d00013  | 0.46807 | ni     | hypothetical protein                                                    | um04604   | 0.37741 | ni     | conserved hypothetical protein                                                                         |
| 22c00115 | 0.46809 | K12196 | AAA-type ATPase                                                         | um12204   | 0.37751 | ni     | conserved hypothetical protein                                                                         |
| 7d00238  | 0.46825 | ni     | uncharacterized conserved protein                                       | um04201   | 0.37765 | K08900 | related to RCS1 - mitochondrial protein of the AAA family of ATPases                                   |
| 19d00086 | 0.46837 | ni     | hypothetical protein                                                    | um00176   | 0.37777 | ni     | probable SAC1 - recessive suppressor of secretary defect                                               |
| 8d00058  | 0.46839 | ni     | hypothetical protein                                                    | um10485   | 0.37786 | ni     | conserved hypothetical protein                                                                         |
| 9d00026  | 0.46864 | K00344 | zinc-binding oxidoreductase                                             | um01566   | 0.37796 | ni     | hypothetical protein                                                                                   |
| 4d00027  | 0.46865 | ni     | inositol polyphosphate 5-phosphatase and related proteins               | um11960   | 0.37799 | ni     | conserved hypothetical protein                                                                         |
| 5d00101  | 0.46878 | ni     | synaptic vesicle transporter SVOP and related transporters              | um00422   | 0.37815 | ni     | conserved hypothetical protein                                                                         |
| 9c00058  | 0.46887 | ni     | lysophospholipase                                                       | um05567   | 0.37836 | K08341 | probable ATG8 - essential for autophagy                                                                |
| 20d00015 | 0.46892 | ni     | hypothetical protein                                                    | um11049.2 | 0.37841 | ni     | related to Exonuclease II                                                                              |
| 20c00058 | 0.46903 | ni     | hismacro and SEC14 domain-containing proteins                           | um00439   | 0.37852 | ni     | conserved hypothetical protein                                                                         |
| 9c00309  | 0.46922 | ni     | hypothetical protein                                                    | um10455   | 0.37867 | ni     | conserved hypothetical protein                                                                         |
| 18d00027 | 0.46932 | ni     | hypothetical protein                                                    | um00357   | 0.37881 | ni     | conserved hypothetical protein                                                                         |
| 7c00178  | 0.46938 | ni     | hypothetical protein                                                    | um11812   | 0.37891 | ni     | related to Cytochrome P450                                                                             |
| 9c00014  | 0.46939 | K13617 | predicted acetyltransferases and hydrolases with the alpha/beta         | um02281   | 0.37894 | K12855 | probable pre-mRNA splicing factor prp1                                                                 |
| 9c00207  | 0.46968 | ni     | hypothetical protein                                                    | um11511   | 0.37897 | K11713 | related to Type I protein geranylgeranyltransferase beta subunit                                       |
| 13d00108 | 0.46968 | ni     | predicted transporter                                                   | um02651   | 0.37903 | K04712 | related to dihydroceramide delta                                                                       |
| 4c00038  | 0.46973 | ni     | cytoskeleton-associated protein and related proteins                    | um05085   | 0.37937 | K10627 | related to postreplication repair protein uvsH                                                         |
| 6c00073  | 0.46981 | ni     | amino acid transporters                                                 | um01535   | 0.37953 | ni     | conserved hypothetical protein                                                                         |
| 9c00069  | 0.47001 | K05909 | multicopper oxidases                                                    | um02510   | 0.37967 | K01213 | probable PGL1 - Endo-polygalacturonase                                                                 |
| 22c00146 | 0.47002 | ni     | hypothetical protein                                                    | um10345   | 0.38013 | ni     | putative protein                                                                                       |
| 6c00081  | 0.4701  | ni     | queuine-trna ribosyltransferase                                         | um11530   | 0.38016 | ni     | putative protein                                                                                       |
| 2c00068  | 0.47018 | ni     | Ca <sup>2+</sup> /calmodulin-dependent protein kinase                   | um15027   | 0.38071 | K10771 | related to exodeoxyribonuclease                                                                        |
| 1d00034  | 0.47025 | ni     | Na <sup>+</sup> /K <sup>+</sup> ATPase, alpha subunit                   | um02499   | 0.38117 | K14003 | conserved hypothetical protein                                                                         |
| 9c00577  | 0.47056 | ni     | hypothetical protein                                                    | um11913   | 0.38118 | ni     | related to PRP43 - spliceosomal RNA helicase                                                           |
| 5d00004  | 0.47064 | K01697 | cystathionine beta-synthase and related enzymes                         | um10075   | 0.38121 | K12161 | related to ubiquitin related modifier URM1                                                             |
| 22d00052 | 0.47066 | ni     | hypothetical protein                                                    | um05964   | 0.38128 | ni     | related to esterase                                                                                    |
| 14c00028 | 0.47071 | K16261 | amino acid transporters                                                 | um04679   | 0.38158 | K12831 | related to spliceosome-associated protein SAP-49                                                       |
| 13c00104 | 0.47072 | K03353 | anaphase-promoting complex (APC), Cdc16 subunit                         | um01950   | 0.38168 | K15532 | conserved hypothetical protein                                                                         |
| 6d00087  | 0.47084 | ni     | hypothetical protein                                                    | um05007   | 0.38168 | ni     | conserved hypothetical protein                                                                         |
| 15d00032 | 0.47112 | ni     | hypothetical protein                                                    | um05518   | 0.38185 | ni     | hypothetical protein                                                                                   |
| 7d00087  | 0.47116 | ni     | hypothetical protein                                                    | um05771   | 0.38193 | ni     | related to aimless RasGEF                                                                              |
| 20c00071 | 0.47123 | ni     | predicted membrane protein                                              | um00697   | 0.38212 | ni     | putative protein                                                                                       |
| 22c00060 | 0.47129 | ni     | hypothetical protein                                                    | um11925   | 0.38214 | K13100 | probable Prip-mRNA splicing factor cwc22                                                               |
| 9c00123  | 0.47151 | ni     | hypothetical protein                                                    | um02469   | 0.38227 | ni     | related to pre-mRNA splicing factor                                                                    |
| 3d00019  | 0.47178 | K13754 | K <sup>+</sup> -dependent Na <sup>+</sup> , Ca <sup>2+</sup> antiporter | um05173   | 0.38252 | K09523 | related to DnaJ homolog subfamily C member 3                                                           |
| 19d00119 | 0.47185 | ni     | hypothetical protein                                                    | um01438   | 0.38253 | ni     | conserved hypothetical protein                                                                         |
| 16d00032 | 0.47197 | K17427 | mitochondrial ribosomal protein L17                                     | um01739   | 0.38278 | ni     | putative protein                                                                                       |
| 14c00063 | 0.47204 | ni     | hypothetical protein                                                    | um00981   | 0.38303 | ni     | putative protein                                                                                       |
| 6d00013  | 0.47205 | ni     | hypothetical protein                                                    | um12076   | 0.38314 | ni     | telomere-associated recQ-like helicase usher                                                           |
| 22d00030 | 0.47236 | ni     | hypothetical protein                                                    | um00574   | 0.38332 | ni     | probable DNA                                                                                           |
| 9d00201  | 0.47249 | K04464 | mitogen-activated protein kinase                                        | um03774   | 0.38332 | ni     | probable positive effector protein GCN20                                                               |
| 6d00095  | 0.47301 | ni     | hypothetical protein                                                    | um05301   | 0.38335 | ni     | putative protein                                                                                       |
| 9c00050  | 0.47305 | ni     | hypothetical protein                                                    | um02346   | 0.38346 | K14787 | probable RNA-binding protein                                                                           |
| 10c00020 | 0.47314 | ni     | vacuolar assembly/sorting protein PEP5V/PS11                            | um04926   | 0.38356 | K01381 | probable PEP4 - aspartyl protease                                                                      |
| 2d00057  | 0.47323 | ni     | hypothetical protein                                                    | um02311   | 0.38358 | ni     | conserved hypothetical protein                                                                         |
| 14d00044 | 0.47353 | ni     | DNA repair protein RAD51/RHP55                                          | um01753   | 0.3836  | ni     | probable GCY1 - galactose-induced protein of aldo                                                      |
| 3c00034  | 0.47364 | K02976 | 40S ribosomal protein S2b                                               | um05302   | 0.38368 | ni     | hypothetical protein                                                                                   |
| 12d00009 | 0.4739  | K14307 | hypothetical protein                                                    | um12010   | 0.38413 | ni     | putative protein                                                                                       |
| 9c00394  | 0.47405 | ni     | mitochondrial/chloroplast ribosomal protein L17                         | um01442   | 0.3843  | ni     | conserved hypothetical protein                                                                         |
| 5c00019  | 0.47406 | ni     | uncharacterized conserved protein                                       | um02526   | 0.38494 | K03537 | conserved hypothetical protein                                                                         |
| 10c00364 | 0.47416 | ni     | FOG, Arabin repeat                                                      | um05030   | 0.38495 | K17081 | probable PIP2 - phosphoin                                                                              |
| 18c00049 | 0.47419 | K10773 | endonuclease III                                                        | um05282   | 0.38506 | K12198 | related to VPS80 involved in vacuolar protein sorting                                                  |
| 9c00284  | 0.4742  | K15014 | nucleoside transporter                                                  | um04457   | 0.38537 | ni     | conserved hypothetical protein                                                                         |
| 11c00054 | 0.4744  | ni     | hypothetical protein                                                    | um04046   | 0.38537 | ni     | related to aldehyde dehydrogenase                                                                      |
| 8d00094  | 0.47443 | ni     | NDR and related serine/threonine kinases                                | um11279   | 0.38538 | ni     | conserved hypothetical protein                                                                         |
| 15c00079 | 0.47448 | ni     | hypothetical protein                                                    | um00382   | 0.38564 | ni     | related to CWC2 - involved in mRNA splicing                                                            |
| 12c00051 | 0.47464 | ni     | hypothetical protein                                                    | um06228   | 0.3855  | K14806 | related to DBP7 - RNA helicase required for 60S ribosomal subunit assembly                             |
| 14c00058 | 0.47483 | ni     | hypothetical protein                                                    | um11242   | 0.3856  | ni     | hypothetical protein                                                                                   |
| 12c00135 | 0.47494 | K08158 | synaptic vesicle transporter SVOP and related transporters              | um03972   | 0.38567 | K02892 | conserved hypothetical protein                                                                         |
| 9c00213  | 0.47503 | ni     | hypothetical protein                                                    | um00336   | 0.38573 | K09780 | conserved hypothetical protein                                                                         |
| 18d00062 | 0.47508 | K13338 | AAA-type ATPase                                                         | um06189   | 0.38595 | ni     | hypothetical protein                                                                                   |
| 20c00028 | 0.47511 | K15272 | predicted UDP-galactose transporter                                     | um05332   | 0.38595 | ni     | conserved hypothetical protein                                                                         |
| 7d00318  | 0.47537 | ni     | hypothetical protein                                                    | um12302   | 0.38621 | ni     | conserved hypothetical Ustilago-specific protein                                                       |
| 19c00028 | 0.47542 | ni     | hypothetical protein                                                    | um00603   | 0.38624 | ni     | putative protein                                                                                       |
| 18d00067 | 0.47544 | ni     | hypothetical protein                                                    | um10227   | 0.38648 | K02952 | related to mitochondrial ribosomal protein S13                                                         |
| 12d00015 | 0.47547 | K13519 | predicted membrane protein                                              | um10323   | 0.38676 | K02919 | conserved hypothetical protein                                                                         |
| 22c00158 | 0.47566 | K00860 | adenosine 5'-phosphosulfate kinase                                      | um00493   | 0.38703 | ni     | conserved hypothetical protein                                                                         |
| 3d00072  | 0.47583 | ni     | carbon-nitrogen hydrolase                                               | um00742   | 0.38704 | ni     | conserved hypothetical protein                                                                         |
| 2c00018  | 0.47593 | ni     | hypothetical protein                                                    | um05537   | 0.38714 | ni     | conserved hypothetical protein                                                                         |
| 18c00091 | 0.47593 | ni     | hypothetical protein                                                    | um00161   | 0.38717 | ni     | hypothetical protein                                                                                   |
| 19d00131 | 0.476   | ni     | alcohol dehydrogenase                                                   | um11594   | 0.3872  | ni     | conserved hypothetical protein                                                                         |
| 20c00077 | 0.47603 | K15371 | glutamate/leucine/phenylalanine/valine dehydrogenases                   | um04494   | 0.38724 | ni     | related to Engulfment and cell motility gene 1 protein                                                 |
| 25d00054 | 0.47608 | K15731 | TFIIH-interacting CTD phosphatase, including NLI-interacting fac        | um01518   | 0.38725 | K02951 | probable 40S ribosomal protein S12                                                                     |
| 27c00052 | 0.47618 | ni     | hypothetical protein                                                    | um11206   | 0.38726 | ni     | conserved hypothetical protein                                                                         |
| 22d00185 | 0.47624 | ni     | dehydrogenases with different specificities                             | um05285   | 0.38726 | K04460 | related to phosphoprotein phosphatase                                                                  |
| 26c00020 | 0.47629 | ni     | uncharacterized conserved protein                                       | um02337   | 0.38732 | ni     | conserved hypothetical protein                                                                         |
| 25d00042 | 0.47647 | ni     | protein tyrosine phosphatase                                            | um04051   | 0.38759 | ni     | conserved hypothetical protein                                                                         |
| 14c00105 | 0.47649 | K12396 | vesicle coat complex AP-3, delta subunit                                | um10261   | 0.38787 | ni     | conserved hypothetical protein                                                                         |
| 9c00036  | 0.47658 | ni     | hypothetical protein                                                    | um03050   | 0.38787 | ni     | conserved hypothetical protein                                                                         |
| 9d00333  | 0.47663 | ni     | glycolipid transfer protein                                             | um05821   | 0.38828 | ni     | hypothetical protein                                                                                   |
| 19d00135 | 0.47664 | ni     | hypothetical protein                                                    | um10335   | 0.38829 | ni     | hypothetical protein                                                                                   |
| 27c00080 | 0.47699 | ni     | hypothetical protein                                                    | um00715   | 0.38881 | ni     | hypothetical protein                                                                                   |
| 3d00090  | 0.47704 | ni     | hypothetical protein                                                    | um01417   | 0.38917 | ni     | related to MDMD10 - mitochondrial morphology and inheritance component                                 |
| 14c00079 | 0.47706 | K06631 | polo-like serine/threonine protein kinase                               | um12023   | 0.38941 | ni     | conserved hypothetical protein                                                                         |
| 26c00006 | 0.47716 | ni     | hypothetical protein                                                    | um11476   | 0.38971 | ni     | related to Guanylyl nucleotide exchange factor Sg2                                                     |
| 14d00121 | 0.47749 | ni     | hypothetical protein                                                    | um01641   | 0.38971 | ni     | conserved hypothetical protein                                                                         |
| 22c00032 | 0.47751 | K05527 | stress-induced protein UVI31+                                           | um11022   | 0.38987 | ni     | related to FRE4 - Farnesyl transferase                                                                 |
| 7d00084  | 0.47756 | ni     | hypothetical protein                                                    | um01505   | 0.38992 | K11252 | probable HTB2 - histone H2B                                                                            |
| 24c00058 | 0.4777  | ni     | helicase-like transcription factor HLTf                                 | um10203   | 0.39016 | ni     | hypothetical protein                                                                                   |
| 25d00092 | 0.47772 | ni     | hypothetical protein                                                    | um0106    |         |        |                                                                                                        |

|           |         |        |                                                                 |           |         |        |                                                                                    |
|-----------|---------|--------|-----------------------------------------------------------------|-----------|---------|--------|------------------------------------------------------------------------------------|
| 11c00052  | 0.48049 | K03495 | NAD/FAD-utilizing protein                                       | um15007   | 0.39302 | K11108 | related to RCL1 - RNA terminal phosphate cyclase-like protein                      |
| 18c00086  | 0.48049 | ni     | hypothetical protein                                            | um01694   | 0.39305 | ni     | conserved hypothetical protein                                                     |
| 313c00001 | 0.48051 | K02396 | RNA splicing factor                                             | um10976   | 0.39307 | K01557 | conserved hypothetical protein                                                     |
| 90010183  | 0.48059 | K12844 | mRNA splicing factor PRP31                                      | um01769   | 0.39319 | ni     | conserved hypothetical protein                                                     |
| 7c00284   | 0.48071 | K01758 | cystathionine beta-lyase                                        | um12039   | 0.39321 | ni     | related to NADH-ubiquinone oxidoreductase 21                                       |
| 12d00028  | 0.48087 | ni     | hypothetical protein                                            | um02904   | 0.39322 | ni     | conserved hypothetical protein                                                     |
| 22d00049  | 0.48092 | ni     | hypothetical protein                                            | um06410   | 0.39322 | K11770 | conserved hypothetical protein                                                     |
| 8c000339  | 0.48099 | ni     | predicted RNA polymerase superfamily                            | um11869   | 0.39358 | K11568 | conserved hypothetical protein                                                     |
| 26d00051  | 0.48107 | K14785 | TBP-binding protein, activator of basal transcription           | um02065   | 0.3939  | K06067 | histone deacetylase                                                                |
| 20d00061  | 0.48109 | ni     | FOG, Predicted E3 ubiquitin ligase                              | um02911   | 0.3941  | K11849 | related to UBP2 - ubiquitin-specific protease                                      |
| 9c000035  | 0.48123 | ni     | hypothetical protein                                            | um10643   | 0.39415 | K02026 | related to dihydroorotate dehydrogenase                                            |
| 7d000056  | 0.48132 | ni     | hypothetical protein                                            | um04632   | 0.39424 | K02943 | probable ribosomal protein P2                                                      |
| 9c000211  | 0.48144 | ni     | uncharacterized conserved protein                               | um06126   | 0.39433 | ni     | Mig2-6                                                                             |
| 5c000016  | 0.48157 | ni     | hypothetical protein                                            | um04751   | 0.39462 | K14852 | related to RRS1 - regulator of ribosome biogenesis                                 |
| 10d00088  | 0.48165 | ni     | hypothetical protein                                            | um04511   | 0.39475 | ni     | probable RML2 - mitochondrial ribosomal protein                                    |
| 12d00104  | 0.48168 | K14411 | RNA-binding protein musashi                                     | um00483   | 0.39481 | ni     | putative protein                                                                   |
| 27c00047  | 0.48168 | ni     | predicted RNA polymerase superfamily                            | um02456   | 0.39487 | ni     | conserved hypothetical protein                                                     |
| 11c00058  | 0.48179 | K12860 | mRNA splicing protein CDC5                                      | um00625   | 0.39516 | K02605 | putative protein                                                                   |
| 22d00120  | 0.48195 | ni     | hypothetical protein                                            | um04895   | 0.39517 | ni     | putative protein                                                                   |
| 18d00108  | 0.48197 | ni     | hypothetical protein                                            | um11755   | 0.39532 | ni     | hypothetical protein                                                               |
| 6d000022  | 0.48199 | ni     | hypothetical protein                                            | um05107   | 0.39539 | K15163 | conserved hypothetical protein                                                     |
| 25c00029  | 0.48201 | ni     | hypothetical protein                                            | um10207   | 0.39547 | K01426 | related to AMD2 - acetamidase                                                      |
| 9c000320  | 0.48247 | ni     | hypothetical protein                                            | um00054   | 0.39554 | ni     | putative protein                                                                   |
| 22c00062  | 0.4828  | ni     | hypothetical protein                                            | um02958   | 0.39555 | K11650 | related to SWI                                                                     |
| 7c00116   | 0.48286 | ni     | membrane protein                                                | um12338   | 0.39557 | ni     | hypothetical protein                                                               |
| 16c00047  | 0.48293 | ni     | hypothetical protein                                            | um10371   | 0.39558 | K08065 | related to transcription factor hsp3                                               |
| 25d00087  | 0.48294 | ni     | hypothetical protein                                            | um10049   | 0.39588 | ni     | related to MNR2 - Manganese resistance protein                                     |
| 12d00099  | 0.48296 | ni     | hypothetical protein                                            | um11085   | 0.39619 | K12735 | related to Multidomain cyclophilin type peptidyl-prolyl cis-trans isomerase        |
| 19d00116  | 0.48325 | ni     | hypothetical protein                                            | um03091   | 0.39625 | ni     | hypothetical protein                                                               |
| 9d000408  | 0.48329 | K14715 | ZnF-like zinc transporter proteins                              | um03491   | 0.39634 | K12180 | related to cag9 signalosome complex subunit 7a                                     |
| 22d01211  | 0.48334 | ni     | ribase kinase and related carbohydrate kinases                  | um04736   | 0.39648 | K12195 | conserved hypothetical protein                                                     |
| 8d00041   | 0.48337 | ni     | hypothetical protein                                            | um00387   | 0.3965  | ni     | ni                                                                                 |
| 12d00107  | 0.48368 | ni     | hypothetical protein                                            | um11282.2 | 0.39659 | ni     | related to Beta-mannosidase precursor                                              |
| 5d000018  | 0.48381 | ni     | hypothetical protein                                            | um05229   | 0.39662 | K01192 | conserved hypothetical protein                                                     |
| 10d00062  | 0.48415 | ni     | clathrin coat dissociation kinase GAK/PTEN/AuXilin              | um03267   | 0.39665 | ni     | conserved hypothetical protein                                                     |
| 15c00070  | 0.48432 | K04563 | protein kinase PCTAIRE and related kinases                      | um10602   | 0.3971  | K10706 | related to SEN1 protein                                                            |
| 19d00095  | 0.4845  | ni     | decapping enzyme complex component DCP1                         | um06093   | 0.3971  | K15272 | related to UDP-galactose transporter                                               |
| 12c00010  | 0.48457 | ni     | hypothetical protein                                            | um00136.2 | 0.39715 | ni     | related to Zinc finger protein                                                     |
| 14c00094  | 0.4849  | K02219 | cyclin-dependent protein kinase CDC28, regulatory subunit CKS   | um04522   | 0.39721 | K10276 | conserved hypothetical protein                                                     |
| 16d00075  | 0.48492 | ni     | hypothetical protein                                            | um00528   | 0.39724 | ni     | conserved hypothetical protein                                                     |
| 24c00015  | 0.48493 | ni     | hypothetical protein                                            | um02657   | 0.39752 | K00671 | related to NMT1 - N-methyltransferase                                              |
| 11d00069  | 0.48507 | K09569 | FKBP-type peptidyl-prolyl cis-trans isomerase                   | um06462   | 0.39773 | ni     | conserved hypothetical protein                                                     |
| 9c000327  | 0.48513 | K08490 | SNARE protein SED5                                              | um06414   | 0.39782 | ni     | related to Polyketide synthase                                                     |
| 25d00067  | 0.48513 | ni     | signal transduction protein                                     | um05292   | 0.39786 | ni     | related to Diga protein                                                            |
| 10d00100  | 0.4852  | ni     | ubiquitin-protein ligase                                        | um05013   | 0.398   | ni     | related to caffeine-induced death protein 1 Cid1                                   |
| 8d00048   | 0.48527 | ni     | hypothetical protein                                            | um00346.2 | 0.39807 | K15859 | related to SKN7 - transcription factor                                             |
| 11d00014  | 0.48527 | ni     | hypothetical protein                                            | um01357   | 0.3981  | ni     | ni                                                                                 |
| 25c00059  | 0.48528 | ni     | hypothetical protein                                            | um02151   | 0.39827 | K00100 | related to 2                                                                       |
| 22d00253  | 0.48537 | ni     | cytochrome c oxidase assembly protein PET191                    | um02167   | 0.39829 | ni     | conserved hypothetical protein                                                     |
| 22d00230  | 0.48579 | ni     | succinyl-coa synthetase, beta subunit                           | um04797   | 0.39864 | K01783 | probable RPE1 - D-ribulose-5-phosphate 3-epimerase                                 |
| 18d00105  | 0.48597 | ni     | ovarian tumor-like cysteine protease                            | um05088   | 0.39885 | ni     | hypothetical protein                                                               |
| 16c00091  | 0.48622 | ni     | uncharacterized conserved protein                               | um00366   | 0.39902 | ni     | conserved hypothetical protein                                                     |
| 7d000007  | 0.48647 | ni     | hypothetical protein                                            | um05384   | 0.39923 | ni     | conserved hypothetical protein                                                     |
| 19c00040  | 0.48678 | ni     | amino acid transporters                                         | um11449   | 0.39929 | ni     | related to Phenol 2-monooxygenase                                                  |
| 22d00042  | 0.48695 | K03441 | aquaporin                                                       | um01580   | 0.39929 | K12385 | related to NCR1 - transmembrane glycoprotein                                       |
| 7d00029   | 0.48695 | ni     | glucanase transport-inducing protein                            | um04030   | 0.39932 | ni     | related to MRPS8 - mitochondrial ribosomal protein                                 |
| 7d00120   | 0.48702 | K10768 | uncharacterized conserved protein                               | um05378   | 0.39942 | K17065 | mitochondrial fusion factor DNMI1                                                  |
| 19d00107  | 0.48702 | ni     | predicted membrane protein                                      | um00186   | 0.39987 | ni     | conserved hypothetical protein                                                     |
| 7c000036  | 0.48716 | K12862 | IRF-2-binding protein CELTIX-1                                  | um05605   | 0.40006 | ni     | hypothetical protein                                                               |
| 5c00153   | 0.4876  | ni     | arylcetamide deacetylase                                        | um05432.2 | 0.40022 | K12662 | related to PRP4 - U4                                                               |
| 8d00043   | 0.48771 | ni     | hypothetical protein                                            | um10747   | 0.40036 | K12586 | related to Exosome complex exonuclease RRP43                                       |
| 11c00037  | 0.48774 | K15026 | predicted translation initiation factor related to eIF-3a       | um04659   | 0.40059 | ni     | conserved hypothetical protein                                                     |
| 8c000029  | 0.48809 | ni     | sphingoid base-phosphate phosphatase                            | um10012   | 0.4007  | ni     | conserved hypothetical protein                                                     |
| 6d000076  | 0.48816 | ni     | hypothetical protein                                            | um10999   | 0.40078 | K10524 | related to NRK1 - Nicotinamide riboside kinase                                     |
| 7c000246  | 0.48826 | K10256 | hypothetical protein                                            | um11555   | 0.4009  | ni     | hypothetical protein                                                               |
| 20d00061  | 0.4884  | K02307 | hypothetical protein                                            | um05577   | 0.40106 | ni     | conserved hypothetical protein                                                     |
| 7c000287  | 0.48862 | ni     | signal transduction serine/threonine kinase                     | um01300   | 0.40114 | ni     | conserved hypothetical Ustilago-specific protein                                   |
| 22c00032  | 0.48863 | ni     | 2-enoyl-CoA hydratase                                           | um00724   | 0.40123 | ni     | ni                                                                                 |
| 15c00044  | 0.48885 | ni     | putative steroid membrane receptor Hpr6.6/25-Dx                 | um12286   | 0.40127 | ni     | conserved hypothetical protein                                                     |
| 19d00055  | 0.48888 | ni     | putative steroid membrane receptor Hpr6.6/25-Dx                 | um03459   | 0.40172 | K10416 | related to dynein light-intermediate chain                                         |
| 10d00075  | 0.4889  | K11339 | dosage sensitive transcription regulatory complex               | um04911   | 0.40175 | K15196 | related to BRP1 - TFIIB subunit                                                    |
| 9c00167   | 0.48901 | K11836 | ubiquitin-specific protease UBP14                               | um11415   | 0.40183 | ni     | conserved hypothetical Ustilago-specific protein                                   |
| 7d00191   | 0.48912 | ni     | hypothetical protein                                            | um04844   | 0.40194 | ni     | ni                                                                                 |
| 9c000023  | 0.48912 | ni     | hypothetical protein                                            | um04009   | 0.40196 | K06980 | conserved hypothetical protein                                                     |
| 14c00006  | 0.48979 | ni     | ATP-dependent RNA helicase                                      | um02307   | 0.40215 | ni     | conserved hypothetical protein                                                     |
| 11d00032  | 0.48981 | ni     | hypothetical protein                                            | um04232   | 0.40215 | K14554 | related to S                                                                       |
| 6c000055  | 0.48985 | K12734 | similar to cyclophilin-type peptidyl-prolyl cis-trans isomerase | um04293   | 0.40237 | ni     | conserved hypothetical protein                                                     |
| 22d01019  | 0.48986 | ni     | vacuolar assembly/sorting protein VPS39/VAM6/VPS3               | um04818   | 0.40259 | ni     | conserved hypothetical protein                                                     |
| 22d00277  | 0.49023 | ni     | hypothetical protein                                            | um00213   | 0.40281 | K03860 | related to GPI1 - required for N-acetylglucosaminyl phosphatidylinositol synthesis |
| 14c00020  | 0.49047 | K11129 | box H4CA snRNP component                                        | um01453   | 0.40326 | K01584 | related to Ustilago-specific protein                                               |
| 2c000046  | 0.49048 | K02941 | 60S acidic ribosomal protein P0                                 | um00516   | 0.40309 | K14573 | related to Nucleolar protein NOP4                                                  |
| 26c00051  | 0.49056 | ni     | Ca2+-dependent lipid-binding protein CLB1                       | um00390   | 0.4031  | ni     | conserved hypothetical protein                                                     |
| 14c00120  | 0.49061 | K13181 | ATP-dependent RNA helicase                                      | um12044   | 0.40318 | ni     | probable TIM9 - Translocase of the mitochondrial Inner Membrane                    |
| 5d001128  | 0.49063 | K02321 | DNA polymerase alpha-prime complex, polymerase-associated       | um11717   | 0.40321 | K11644 | related to SIN3 - transcription regulatory protein                                 |
| 9c000206  | 0.49102 | ni     | 3-methylcrotonyl DNA glycosylase                                | um02361   | 0.4035  | ni     | related to ATPase inhibitor                                                        |
| 19d00161  | 0.49112 | K12273 | preprotein translocase subunit Sec66                            | um10777   | 0.40352 | K00485 | related to Dimethylamine monoxygenase                                              |
| 8c000085  | 0.49123 | ni     | permease of the major facilitator superfamily                   | um06127   | 0.40368 | ni     | conserved hypothetical Ustilago-specific protein                                   |
| 14c00017  | 0.49125 | K11863 | ataxin 3                                                        | um03751   | 0.40396 | ni     | hypothetical protein                                                               |
| 15c00049  | 0.49152 | ni     | hypothetical protein                                            | um11635   | 0.40502 | K04554 | probable UBC5 - E2 ubiquitin-conjugating enzyme                                    |
| 12d00031  | 0.4917  | K03004 | DNA-dependent RNA polymerase I                                  | um03146   | 0.40537 | ni     | related to TIM54                                                                   |
| 24d00061  | 0.49173 | ni     | permease of the major facilitator superfamily                   | um04601   | 0.40549 | ni     | hypothetical protein                                                               |
| 25d00026  | 0.49193 | ni     | actin-related protein - Arp4/Act3p                              | um11029   | 0.40556 | K02946 | related to RSM10 - mitochondrial ribosomal protein                                 |
| 14c00129  | 0.49199 | ni     | uncharacterized conserved protein                               | um10074   | 0.40576 | ni     | conserved hypothetical protein                                                     |
| 12c00006  | 0.49204 | ni     | cyclin                                                          | um10317.2 | 0.40585 | ni     | putative protein                                                                   |
| 22c00055  | 0.49205 | ni     | flavin-containing monoxygenase                                  | um02108   | 0.40592 | ni     | conserved hypothetical protein                                                     |
| 6d00042   | 0.49224 | K03515 | translesion DNA polymerase - REV1 deoxycytidyl transferase      | um02807   | 0.40662 | K09788 | conserved hypothetical protein                                                     |
| 6c001125  | 0.49228 | K09553 | molecular co-chaperone STH1                                     | um05478   | 0.40663 | ni     | conserved hypothetical protein                                                     |
| 2c000035  | 0.49237 | ni     | hypothetical protein                                            | um01308   | 0.40667 | ni     | related to Trophoblast                                                             |
| 19c00013  | 0.49262 | ni     | hypothetical protein                                            | um00305.2 | 0.40667 | ni     | related to SAC3 - leucine permease transcriptional regulator                       |
| 27d00057  | 0.49266 | K00872 | homoserine kinase                                               | um00364.2 | 0.40677 | K12844 | related to U4                                                                      |
| 22d00010  | 0.49283 | ni     | hypothetical protein                                            | um02925   | 0.40686 | ni     | hypothetical protein                                                               |
| 22c00187  | 0.49284 | ni     | hypothetical protein                                            | um04856   | 0.40698 | K08286 | protein kinase Ukc1p                                                               |
| 25c00006  | 0.49308 | ni     | hypothetical protein                                            | um02872   | 0.40705 | ni     | conserved hypothetical protein                                                     |
| 13d00016  | 0.49313 | ni     | hypothetical protein                                            | um11636   | 0.40732 | ni     | related to vacuolar protein sorting 16                                             |
| 7c000201  | 0.49322 | K11341 | transcription initiation factor IIF, auxiliary subunit          | um04765   | 0.40736 | K03439 | probable TRM8 - part of complex required for 7-methylguanosine modification        |
| 9c000113  | 0.49331 | ni     | hypothetical protein                                            | um12025   | 0.40784 | ni     | conserved hypothetical protein                                                     |
| 9c000265  | 0.49332 | ni     | hypothetical protein                                            | um00017   | 0.40815 | ni     | conserved hypothetical protein                                                     |
| 5d00102   | 0.49366 | K14154 | hypothetical protein                                            | um11648   | 0.40841 | K06287 | conserved hypothetical protein                                                     |
| 25c00089  | 0.49401 | ni     | hypothetical protein                                            | um10123   | 0.40865 | K13303 | SK1-type AGC kinase                                                                |
| 11d00059  | 0.49415 | ni     | hypothetical protein                                            | um10689   | 0.4087  | K01705 | probable LYS4 - homocarnitase precursor                                            |
| 12c00082  | 0.49433 | K15634 | thymidylate synthase                                            | um04514   | 0.40885 | ni     | hypothetical protein                                                               |
| 27d00098  | 0.49436 | K12831 | splicing factor 3b, subunit 4                                   | um05825   | 0.40885 | K14565 | probable NCR5 - required for pre-18S RNA processing                                |
| 7d000313  | 0.4944  | ni     | hypothetical protein                                            | um05684   | 0.40916 | K12386 | related to cystostinin                                                             |
| 14c00006  | 0.49447 | K02830 | checkpoint 9-1-1 complex, RAD1 component                        | um02344   | 0.40942 | K02519 | related to translation initiation factor IF-2                                      |
| 12d00093  | 0.49454 | K06316 | nuclear division RFT1 protein                                   | um05836   | 0.40948 | K06911 | conserved hypothetical protein                                                     |
| 8d00107   | 0.49454 | ni     | hypothetical protein                                            | um11424   | 0.4095  | K01433 | conserved hypothetical protein                                                     |
| 6c000010  | 0.49464 | ni     | long chain fatty acid elongase                                  | um00981   | 0.40954 | ni     | putative protein                                                                   |
| 22d00116  | 0.49472 | ni     | permease of the major facilitator superfamily                   | um02896   | 0.40965 | ni     | putative protein                                                                   |
| 10d00060  | 0.49473 | K00384 | thioredoxin reductase                                           | um11377   | 0.40965 | ni     | ni                                                                                 |
| 20c00059  | 0.49474 | ni     | phospholipid scramblase                                         | um01275   | 0.40966 | K02738 | probable PRE3 - 20S proteasome subunit                                             |
| 16c00025  | 0.49507 | ni     | hypothetical protein                                            | um11962.2 | 0.40976 | ni     | probable Arp2                                                                      |
| 24d00026  | 0.4952  | ni     | hypothetical protein                                            | um10196   | 0.40976 | ni     | related to TOM22 - mitochondrial outer membrane import receptor complex subunit    |
| 19c00053  | 0.49527 | K12190 | vacuolar sorting protein VPS36                                  | um05774   | 0.40978 | ni     | related to metalloprotease MEP1                                                    |
| 5c00134   | 0.49538 | ni     | ribosomal protein S5                                            | um04368   | 0.40981 | ni     | related to endo-                                                                   |
| 9d000340  | 0.4954  | K02891 | 60S ribosomal protein L22                                       | um05306   | 0.40984 | K05757 | probable Arp2                                                                      |
| 8c000084  | 0.49577 | ni     | hypothetical protein                                            | um02426   | 0.41012 | K10575 | probable ubiquitin-conjugating enzyme E2                                           |
| 7c00042   | 0.49577 | ni     | hypothetical protein                                            | um11552   | 0.41018 | ni     | hypothetical protein                                                               |
| 7c000288  | 0.49583 | K11324 | DNA methyltransferase 1-associated protein-1                    | um11602   | 0.41046 | ni     | related to zinc finger protein                                                     |
| 16c00007  | 0.49589 | ni     | hypothetical protein                                            | um10551.2 | 0.41062 | K03142 | probable SSL1 - FIIH subunit                                                       |
| 6d000063  | 0.49598 | ni     | purpke acid phosphatase                                         | um00568   | 0.41132 | ni     | hypothetical protein                                                               |
| 10c00047  | 0.49617 | ni     | hypothetical protein                                            | um10934   | 0.41142 | K11237 | related to Protein scd2                                                            |
| 25c00022  | 0.4962  | K12398 | clathrin-associated protein medium chain                        | um10625   | 0.41147 | K02896 | probable ribosomal protein L24                                                     |
| 9c000298  | 0.49625 | ni     | hypothetical protein                                            | um00364   | 0.41173 | ni     | putative protein                                                                   |
| 16d00029  | 0.49628 | K03169 | predicted metal-binding protein                                 | um05091.2 | 0.41181 | K03238 | probable SUI3 - translation initiation factor eIF2 beta subunit                    |
| 9c000229  | 0.49638 | ni     | hypothetical protein                                            | um00711   | 0.41207 | K06698 | related to Proteasome activator complex subunit 3                                  |
| 10c00075  | 0.49648 |        |                                                                 |           |         |        |                                                                                    |

|          |         |        |                                                                 |           |         |        |                                                                                         |
|----------|---------|--------|-----------------------------------------------------------------|-----------|---------|--------|-----------------------------------------------------------------------------------------|
| 25d00017 | 0.4987  | K02726 | 20S proteasome, regulatory subunit alpha type PSMA2/PRE8        | um03980   | 0.4161  | ni     | conserved hypothetical protein                                                          |
| 26d00030 | 0.49874 | K11279 | nucleosome assembly protein NAP-1                               | um03745   | 0.41623 | ni     | conserved hypothetical Ustilago-specific protein                                        |
| 10d00014 | 0.49877 | K02925 | 60S ribosomal protein L3                                        | um01534   | 0.41633 | ni     | putative protein                                                                        |
| 7d00130  | 0.49887 | ni     | hypothetical protein                                            | um10845   | 0.41634 | ni     | conserved hypothetical protein                                                          |
| 24c00060 | 0.49895 | ni     | folypolyglutamate synthase                                      | um11142   | 0.41657 | K01733 | probable THR4 - threonine synthase                                                      |
| 12d00016 | 0.49919 | K17302 | vesicle coat complex COP1, beta' subunit                        | um10422   | 0.41668 | ni     | putative protein                                                                        |
| 22d01019 | 0.49925 | ni     | 3-oxacyl CoA thiolase                                           | um02262   | 0.41706 | K14832 | related to MAK21 - protein required for 60S ribosomal subunit biogenesis                |
| 3d00028  | 0.49947 | ni     | histone H2B                                                     | um00746   | 0.41706 | ni     | conserved hypothetical Ustilago-specific protein                                        |
| 10d00034 | 0.49955 | K12041 | sodium/hydrogen exchanger protein                               | um04720   | 0.41733 | ni     | putative protein                                                                        |
| 19d00066 | 0.49963 | ni     | hypothetical protein                                            | um04466   | 0.4174  | K12623 | related to U6 snRNA-associated Sm-like protein LSM4                                     |
| 8d00018  | 0.49967 | K11568 | hypothetical protein                                            | um03535   | 0.41749 | ni     | hypothetical protein                                                                    |
| 16d00032 | 0.49995 | ni     | hypothetical protein                                            | um11659   | 0.4175  | ni     | putative protein                                                                        |
| 8d00098  | 0.50006 | ni     | hypothetical protein                                            | um11182   | 0.41755 | ni     | conserved hypothetical protein                                                          |
| 3d00073  | 0.50007 | ni     | hypothetical protein                                            | um01529   | 0.41757 | K03134 | related to TAF10 - TFIID and SAGA subunit                                               |
| 16d00077 | 0.50011 | K15115 | mitochondrial FAD carrier protein                               | um01504   | 0.41761 | K11251 | probable Histone H2A                                                                    |
| 7d00341  | 0.50019 | K09250 | E3 ubiquitin ligase interacting with arginine methyltransferase | um11089   | 0.41786 | ni     | related to CHS7 - control of protein export from the ER                                 |
| 22d00039 | 0.50022 | K11252 | hypothetical protein                                            | um04812   | 0.41787 | ni     | putative protein                                                                        |
| 18d00114 | 0.50056 | ni     | hypothetical protein                                            | um10386   | 0.41798 | ni     | conserved hypothetical protein                                                          |
| 26d00080 | 0.50057 | K03012 | RNA polymerase II, fourth largest subunit                       | um05295   | 0.41809 | ni     | conserved hypothetical Ustilago-specific protein                                        |
| 10c00072 | 0.50073 | K01922 | uncharacterized conserved protein                               | um02386   | 0.41814 | K02965 | probable mitochondrial ribosomal protein S19                                            |
| 7d00270  | 0.50085 | K11808 | phosphotriphosphatidomethylsuccinocarboxamide synthase          | um00156.2 | 0.41819 | ni     | conserved hypothetical protein                                                          |
| 9d00252  | 0.5009  | ni     | hypothetical protein                                            | um11066   | 0.41826 | ni     | conserved hypothetical Ustilago-specific protein                                        |
| 9d00127  | 0.50165 | ni     | predicted dehydrogenase                                         | um01957   | 0.41835 | K01230 | related to Mannosyl-oligosaccharide alpha-1                                             |
| 24d00044 | 0.50177 | ni     | transport protein particle TRAPP complex subunit                | um00745   | 0.41842 | ni     | putative protein                                                                        |
| 22c01077 | 0.50184 | K12584 | uncharacterized conserved protein                               | um06201   | 0.41864 | K04499 | probable RVB1 - RUVB-like protein                                                       |
| 22c00011 | 0.50192 | ni     | hypothetical protein                                            | um01865   | 0.41865 | ni     | hypothetical protein                                                                    |
| 6d00005  | 0.50205 | K00155 | aldehyde dehydrogenase                                          | um02450   | 0.41884 | K03263 | probable HYP2 - translation initiation factor eIF5A                                     |
| 26d00039 | 0.50207 | K03934 | NADH:ubiquinone oxidoreductase, NDUFS1/75 kDa subunit           | um05603   | 0.41901 | K01053 | related to Gluconolactonase                                                             |
| 9d00286  | 0.50208 | ni     | helicase-like transcription factor HLTf                         | um06279   | 0.41919 | ni     | hypothetical protein                                                                    |
| 25d0054  | 0.50211 | K02901 | 60S ribosomal protein L27                                       | um02138   | 0.41931 | ni     | effector family protein Eff1-6                                                          |
| 18d00003 | 0.50213 | ni     | predicted membrane protein                                      | um01867   | 0.41945 | K12598 | probable MTS4 - involved in nucleocytoplasmic transport of mRNA                         |
| 10c00066 | 0.50231 | K04708 | ethanolamine-p-transferase GP111/PIG-F                          | um01937   | 0.41954 | ni     | related to acid sphingomyelinase                                                        |
| 9d00289  | 0.50239 | K04649 | ubiquitin-protein ligase                                        | um01087   | 0.41981 | K03347 | probable SCF complex member Cullin 1                                                    |
| 3d00053  | 0.50246 | K02328 | DNA polymerase delta, regulatory subunit 55                     | um10737   | 0.41985 | K14567 | conserved hypothetical protein                                                          |
| 12c00007 | 0.50248 | ni     | hypothetical protein                                            | um11583   | 0.41988 | K03939 | related to NADH2 dehydrogenase                                                          |
| 9d00360  | 0.50268 | ni     | mitochondrial import inner membrane translocase, subunit TIM8   | um04856   | 0.42002 | ni     | conserved hypothetical protein                                                          |
| 9d00025  | 0.50277 | ni     | hypothetical protein                                            | um01842   | 0.42002 | ni     | hypothetical protein                                                                    |
| 6d00039  | 0.50279 | K15109 | mitochondrial carrier protein                                   | um01244   | 0.42035 | ni     | conserved hypothetical protein                                                          |
| 9d01161  | 0.50288 | ni     | hypothetical protein                                            | um05305   | 0.42038 | ni     | conserved hypothetical Ustilago-specific protein                                        |
| 22d00061 | 0.50324 | ni     | vacuolar sorting protein VPS22                                  | um15987   | 0.42054 | ni     | conserved hypothetical protein                                                          |
| 11c00078 | 0.50337 | ni     | nicotinic acid phosphoribosyltransferase                        | um11214   | 0.4207  | ni     | related to conserved oligomeric Golgi complex component 6                               |
| 19d00162 | 0.50347 | ni     | ras 1 guanine nucleotide exchange factor                        | um00778   | 0.42075 | K03955 | probable ACP1 - mitochondrial acyl-carrier protein                                      |
| 25d00014 | 0.50391 | ni     | hypothetical protein                                            | um11240   | 0.4208  | ni     | putative protein                                                                        |
| 12c00180 | 0.50423 | ni     | hypothetical protein                                            | um01239   | 0.42092 | ni     | conserved hypothetical Ustilago-specific protein                                        |
| 24c00062 | 0.50487 | ni     | hypothetical protein                                            | um05801   | 0.42097 | ni     | related to C2H2 zinc finger protein                                                     |
| 5d00044  | 0.50497 | K02987 | 40S ribosomal protein S4                                        | um00032   | 0.42103 | ni     | hypothetical protein                                                                    |
| 11d00013 | 0.50499 | K03649 | G/T mismatch-specific thymine DNA glycosylase                   | um03003   | 0.42142 | ni     | probable GUP1 - Multimembrane-spanning protein essential for proton symport of glycerol |
| 6d00108  | 0.50503 | K00939 | adenylate kinase                                                | um10556   | 0.42174 | ni     | hypothetical protein                                                                    |
| 9d00329  | 0.50568 | ni     | hypothetical protein                                            | um01519   | 0.42174 | ni     | putative protein                                                                        |
| 9d00074  | 0.50511 | K15172 | RNA polymerase II transcription elongation factor DSIF/SUPT5H   | um12121   | 0.42177 | ni     | putative protein                                                                        |
| 3d00033  | 0.50522 | ni     | predicted spermine/spermidine synthase                          | um06459   | 0.42178 | ni     | ni                                                                                      |
| 26c00022 | 0.50531 | ni     | hypothetical protein                                            | um11223   | 0.42208 | ni     | conserved hypothetical protein                                                          |
| 9d00264  | 0.50559 | K10601 | E3 ubiquitin ligase                                             | um02422   | 0.42221 | K11236 | related to CD24 - GTP                                                                   |
| 9d00113  | 0.5059  | K12624 | U6 snRNA-associated Sm-like protein                             | um10639   | 0.42222 | ni     | conserved hypothetical protein                                                          |
| 9c00094  | 0.50595 | ni     | hypothetical protein                                            | um00199   | 0.4224  | K03247 | related to eIF3h - translation initiation factor 3 subunit H                            |
| 26c00072 | 0.50605 | ni     | hypothetical protein                                            | um02812   | 0.42269 | ni     | hypothetical protein                                                                    |
| 16d00081 | 0.50608 | ni     | hypothetical protein                                            | um10833   | 0.42286 | K00653 | related to histone acetyltransferase 3                                                  |
| 22d01051 | 0.50631 | K15463 | mitochondrial RNA phosphoribosyl-transferase                    | um05294   | 0.42339 | ni     | conserved hypothetical Ustilago-specific protein                                        |
| 9d00307  | 0.50691 | K02605 | hypothetical protein                                            | um00763   | 0.42355 | ni     | conserved hypothetical protein                                                          |
| 9c00066  | 0.50708 | ni     | synaptic vesicle transporter SVOP and related transporters      | um11146   | 0.42371 | ni     | hypothetical protein                                                                    |
| 26d00023 | 0.50718 | K01556 | L-tryptophan hydrolase                                          | um10533   | 0.42373 | K00164 | probable KGD1 - alpha-ketoglutarate dehydrogenase                                       |
| 25d00071 | 0.50725 | ni     | uncharacterized conserved protein                               | um05300   | 0.42385 | K03960 | probable 40S Ribosomal protein S14                                                      |
| 11c00056 | 0.50725 | ni     | uncharacterized conserved protein                               | um03307   | 0.42405 | K01934 | related to 5-formyltetrahydrofolate cyclo-ligase                                        |
| 7d00160  | 0.50727 | K15029 | RNA polymerase I-associated factor - PAF67                      | um11691   | 0.42424 | ni     | conserved hypothetical protein                                                          |
| 27c00051 | 0.5073  | K17103 | hypothetical protein                                            | um11417   | 0.42439 | ni     | conserved hypothetical Ustilago-specific protein                                        |
| 16d00041 | 0.50738 | K11338 | DNA helicase TIP49                                              | um10343   | 0.4244  | ni     | conserved hypothetical protein                                                          |
| 6d00112  | 0.5074  | ni     | hypothetical protein                                            | um11817   | 0.42454 | K13511 | related to YAK1 - L-lysophosphatidylcholine acyltransferase                             |
| 10d00071 | 0.5074  | ni     | hypothetical protein                                            | um06306   | 0.42462 | ni     | related to YAK1 - ser                                                                   |
| 16d00040 | 0.50759 | ni     | mitochondrial ribosomal protein L16                             | um05653.2 | 0.42479 | ni     | conserved hypothetical protein                                                          |
| 5d00099  | 0.50761 | K08054 | calnexin                                                        | um04346   | 0.42487 | K06100 | related to Symplekin                                                                    |
| 24d00025 | 0.50763 | ni     | NADH pyrophosphatase I of the Nudix family of hydrolases        | um11318   | 0.42487 | K02970 | probable N-terminal acetyltransferase complex subunit ARD1                              |
| 4c00013  | 0.50791 | ni     | hypothetical protein                                            | um10512   | 0.425   | K03013 | probable 25 kD subunit of DNA-directed RNA polymerase I                                 |
| 22c00316 | 0.50795 | ni     | hypothetical protein                                            | um03178   | 0.42503 | K14325 | conserved hypothetical protein                                                          |
| 22d00250 | 0.50858 | K10858 | DNA mismatch repair protein - MLH2/PMS1/Pms2 family             | um11643   | 0.42509 | ni     | putative protein                                                                        |
| 14c00071 | 0.50879 | ni     | hypothetical protein                                            | um02564   | 0.42523 | K14545 | related to CDC73 - DNA-directed RNA polymerase II accessory protein                     |
| 14c00065 | 0.50882 | ni     | hypothetical protein                                            | um05127   | 0.42523 | K15175 | related to YAK1 - L-lysophosphatidylcholine acyltransferase                             |
| 11d00012 | 0.50901 | ni     | hypothetical protein                                            | um11314   | 0.42529 | K09250 | related to GIS2 - Putative zinc finger protein                                          |
| 22d00237 | 0.50908 | K13171 | splicing coactivator SRm160/300, subunit SRm160                 | um03541   | 0.42543 | ni     | related to Meiotic expression upregulated protein 26                                    |
| 26d00090 | 0.50913 | ni     | hypothetical protein                                            | um04613   | 0.42545 | ni     | related to APP1 - Actin Patch Protein                                                   |
| 7d00360  | 0.50915 | ni     | microbial chaperones HSP105/HSP110/SSB1                         | um00895   | 0.42549 | ni     | conserved hypothetical protein                                                          |
| 9d00389  | 0.50925 | K01937 | CTP synthase                                                    | um03823   | 0.42556 | ni     | hypothetical protein                                                                    |
| 7c01037  | 0.50938 | K14397 | mRNA cleavage factor I subunit                                  | um10821   | 0.42577 | ni     | conserved hypothetical protein                                                          |
| 11d00051 | 0.5095  | ni     | actin-binding protein Coronin                                   | um00251   | 0.42605 | ni     | conserved hypothetical protein                                                          |
| 26c00020 | 0.50969 | ni     | hypothetical protein                                            | um04845   | 0.42611 | ni     | conserved hypothetical protein                                                          |
| 19d01031 | 0.50971 | K08495 | SNARE protein GS28                                              | um04568   | 0.42613 | ni     | conserved hypothetical protein                                                          |
| 22d00223 | 0.50985 | K00624 | carnitine O-acetyltransferase CPT2/YAT1                         | um05614   | 0.42617 | ni     | related to Acetyltransferase                                                            |
| 16d00083 | 0.51005 | ni     | hypothetical protein                                            | um05095   | 0.42634 | ni     | hypothetical protein                                                                    |
| 3c00072  | 0.51018 | K13099 | uncharacterized conserved protein                               | um05646   | 0.42637 | ni     | conserved hypothetical protein                                                          |
| 14c00022 | 0.51037 | ni     | hypothetical protein                                            | um11471   | 0.42657 | ni     | conserved hypothetical protein                                                          |
| 10c00085 | 0.51065 | ni     | hypothetical protein                                            | um10615   | 0.42694 | K07976 | probable VPS21 - Rab5-like GTPase involved in vacuolar protein sorting                  |
| 3d00062  | 0.51105 | ni     | mitochondrial RNA helicase SUV3                                 | um02520   | 0.4271  | ni     | conserved hypothetical protein                                                          |
| 8d00114  | 0.51108 | ni     | hypothetical protein                                            | um02487   | 0.42711 | ni     | conserved hypothetical protein                                                          |
| 9d00292  | 0.51111 | ni     | hypothetical protein                                            | um03701   | 0.42737 | ni     | conserved hypothetical protein                                                          |
| 16c01061 | 0.51121 | ni     | uncharacterized mRNA-associated protein RAP55                   | um01499   | 0.42743 | ni     | hypothetical protein                                                                    |
| 6d00059  | 0.51121 | ni     | hypothetical protein                                            | um12321   | 0.42749 | ni     | conserved hypothetical protein                                                          |
| 9d00023  | 0.51122 | ni     | uncharacterized conserved protein                               | um01017   | 0.42756 | ni     | conserved hypothetical protein                                                          |
| 10c00025 | 0.51124 | K14309 | cullins                                                         | um05309   | 0.42763 | ni     | conserved hypothetical Ustilago-specific protein                                        |
| 7c00028  | 0.51136 | ni     | hypothetical protein                                            | um05190   | 0.4277  | K02964 | probable RPS18a - ribosomal protein S18                                                 |
| 6c00054  | 0.51144 | ni     | hypothetical protein                                            | um06169   | 0.42781 | K15901 | conserved hypothetical protein                                                          |
| 9d00011  | 0.51155 | ni     | hypothetical protein                                            | um04562   | 0.42793 | K14454 | probable aspartate aminotransferase                                                     |
| 9d00163  | 0.51158 | K04555 | ubiquitin-protein ligase                                        | um11894   | 0.42806 | ni     | putative protein                                                                        |
| 3c00050  | 0.51195 | K06927 | putative translation initiation inhibitor UK114/IBM1            | um10347   | 0.42808 | K11672 | related to ARPS - Actin-related protein                                                 |
| 24d00094 | 0.51221 | ni     | hypothetical protein                                            | um04313   | 0.4281  | ni     | putative protein                                                                        |
| 24d00050 | 0.5126  | K00121 | alcohol dehydrogenase                                           | um00233   | 0.42812 | K14328 | conserved hypothetical protein                                                          |
| 9c00073  | 0.51266 | K11313 | histone acetyltransferase PCAF/SAGA, subunit SUPT3H/SPT3        | um00067   | 0.42831 | K10625 | related to ubiquitin-protein ligase e3 component                                        |
| 19d00097 | 0.51294 | ni     | hypothetical protein                                            | um11489   | 0.42842 | ni     | hypothetical protein                                                                    |
| 19d0006  | 0.51297 | ni     | uncharacterized conserved protein                               | um06498   | 0.42855 | ni     | putative protein                                                                        |
| 13d00047 | 0.51298 | ni     | araldin/beta-catenin-like repeat-containing protein             | um05780   | 0.42879 | ni     | hypothetical protein                                                                    |
| 7d00146  | 0.51304 | K00294 | delta-1-pyrroline-5-carboxylate dehydrogenase                   | um05580   | 0.42882 | K07941 | probable ADP-ribosylation factor 6                                                      |
| 9c00063  | 0.51306 | ni     | predicted dehydrogenase                                         | um03553   | 0.42883 | ni     | conserved hypothetical protein                                                          |
| 4d00034  | 0.51317 | K01759 | glyoxalase                                                      | um10043   | 0.42887 | K00791 | related to RNA isopentenylpyrophosphate transferase                                     |
| 7d00150  | 0.51362 | ni     | hypothetical protein                                            | um06362   | 0.42893 | ni     | related to Para-nitrobenzyl esterase                                                    |
| 13d00071 | 0.51446 | ni     | hypothetical protein                                            | um04202   | 0.4291  | K11835 | related to UDP12 - ubiquitin C-terminal hydrolase                                       |
| 24d00047 | 0.5146  | K08065 | CCAAT-binding factor, subunit A                                 | um06143   | 0.42911 | ni     | hypothetical protein                                                                    |
| 24d00029 | 0.51508 | K02895 | hypothetical protein                                            | um03218   | 0.42921 | ni     | related to Secretory carrier-associated membrane protein 2                              |
| 27d00071 | 0.51532 | K00413 | cytochrome c1                                                   | um05369   | 0.42936 | K09142 | conserved hypothetical protein                                                          |
| 10c00092 | 0.51543 | ni     | peptidyl-prolyl cis-trans isomerase                             | um00362   | 0.42937 | ni     | conserved hypothetical protein                                                          |
| 16c00043 | 0.51544 | ni     | uncharacterized protein PSP1                                    | um02901   | 0.42942 | ni     | conserved hypothetical protein                                                          |
| 22c00108 | 0.51604 | ni     | hypothetical protein                                            | um00440   | 0.42943 | ni     | conserved hypothetical protein                                                          |
| 6d00093  | 0.51622 | K12873 | G10 protein                                                     | um04407   | 0.42956 | ni     | conserved hypothetical protein                                                          |
| 22d00093 | 0.51623 | K00670 | N-acetyltransferase                                             | um05974   | 0.42963 | ni     | putative protein                                                                        |
| 8d00097  | 0.51652 | K10592 | E3 ubiquitin-protein ligase                                     | um11719   | 0.42967 | K02987 | probable ribosomal protein S4                                                           |
| 6d00036  | 0.5166  | K12161 | ubiquitin-like protein                                          | um02245   | 0.42971 | K14004 | probable SEC13 - protein transport protein                                              |
| 27c00097 | 0.5166  | ni     | multidrug resistance-associated protein                         | um01040   | 0.42978 | K00823 | probable 4-aminobutyrate aminotransferase                                               |
| 5d00094  | 0.51679 | ni     | hypothetical protein                                            | um11159   | 0.42998 | ni     | putative protein                                                                        |
| 18c00028 | 0.5173  | ni     | vesicle coat complex AP-1/AP-2/AP-4, beta subunit               | um10748   | 0.43001 | ni     | conserved hypothetical protein                                                          |
| 7d00070  | 0.51759 | K03145 | transcription elongation factor TFIIS                           | um00270   | 0.43014 | ni     | putative protein                                                                        |
| 18d00057 | 0.51764 | ni     | hypothetical protein                                            | um11209   | 0.43021 | K07973 | probable Guanine nucleotide-binding protein gamma subunit                               |
| 22c01017 | 0.51787 | ni     | hypothetical protein                                            | um01273   | 0.43042 | K11855 | related to ubiquitin carboxy-terminal hydrolase 36                                      |
| 4d00033  | 0.51793 | K16803 | microtubule-associated protein                                  | um03486   | 0.43046 | K14022 | conserved hypothetical protein                                                          |
| 22d00029 | 0.51803 | ni     | SNARE protein TLG1                                              | um03685   | 0.43047 | ni     | related to YVC1 - vacuolar cation channel                                               |
| 15d00047 | 0.51818 | ni     | hypothetical protein                                            | um10522   | 0.43052 | K04711 | related to YPC1 - Alkaline ceramidase                                                   |
| 16c00031 | 0.51819 | ni     | hypothetical protein                                            | um01811   | 0.43057 | ni     | related to complex I intermediate-associated protein CIA30 precursor                    |
| 25c00057 | 0.51826 | ni     | sensory transcription histidine kinase                          | um03062   | 0.43062 | ni     | conserved hypothetical Ustilago-specific protein                                        |
| 22d00104 | 0.518   |        |                                                                 |           |         |        |                                                                                         |

|          |         |        |                                                                    |           |         |        |                                                                                   |
|----------|---------|--------|--------------------------------------------------------------------|-----------|---------|--------|-----------------------------------------------------------------------------------|
| 5000121  | 0.52122 | ni     | predicted methyltransferase                                        | um10079   | 0.43456 | ni     | probable lanosterol synthase                                                      |
| 8000012  | 0.52135 | K17095 | aneurin                                                            | um00262   | 0.43473 | ni     | conserved hypothetical protein                                                    |
| 9030432  | 0.52136 | K07107 | hypothetical protein                                               | um11236   | 0.43484 | ni     | ni                                                                                |
| 2200045  | 0.52138 | K03468 | mitogen-activated protein kinase kinase                            | um01045   | 0.435   | K13123 | conserved hypothetical protein                                                    |
| 5000127  | 0.52163 | K15306 | ran-binding protein RANBP1 and related RanBD domain proteins       | um10475   | 0.43544 | ni     | putative protein                                                                  |
| 1900083  | 0.52165 | K10997 | DNA topoisomerase I-interacting protein                            | um00536   | 0.43555 | ni     | conserved hypothetical protein                                                    |
| 1900157  | 0.5218  | ni     | FOG, Low-complexity                                                | um01495   | 0.43566 | K15115 | related to Y1A6 - P-uvulate transporter of the mitochondrial inner membrane       |
| 1000053  | 0.52201 | ni     | beta (bacterial stress-induced morphogen)-related protein          | um00354   | 0.43562 | ni     | conserved hypothetical protein                                                    |
| 9000192  | 0.52207 | ni     | hypothetical protein                                               | um01146   | 0.43566 | ni     | conserved hypothetical protein                                                    |
| 9000117  | 0.52242 | K16185 | GTP-binding protein                                                | um05406   | 0.43595 | ni     | endosomal t-SNARE                                                                 |
| 6000016  | 0.52244 | ni     | hypothetical protein                                               | um00238   | 0.43597 | ni     | conserved hypothetical Ustilago-specific protein                                  |
| 7000126  | 0.52257 | ni     | ferri-1                                                            | um01235   | 0.436   | K15030 | related to iron-translocation initiation factor 3 subunit M                       |
| 9000318  | 0.52272 | K01488 | adenine desaminase                                                 | um00926   | 0.43614 | K02872 | probable ribosomal protein L13a                                                   |
| 5000123  | 0.52274 | K00033 | 6-phosphogluconate dehydrogenase                                   | um01834   | 0.43628 | ni     | conserved hypothetical protein                                                    |
| 9000214  | 0.52285 | K01441 | ceramidases                                                        | um00476   | 0.43648 | ni     | related to 2-hydroxy-6-oxo-6-phenylhexa-2                                         |
| 1900121  | 0.52291 | ni     | hypothetical protein                                               | um00501   | 0.43648 | ni     | hypothetical protein                                                              |
| 1600067  | 0.52307 | K03869 | culin-3                                                            | um10617   | 0.43658 | ni     | conserved hypothetical protein                                                    |
| 1500025  | 0.5232  | ni     | hypothetical protein                                               | um04605   | 0.43675 | K12274 | conserved hypothetical protein                                                    |
| 6000070  | 0.52338 | K15015 | amino acid transporters                                            | um00798   | 0.43676 | K15505 | related to RAD5 - DNA helicase                                                    |
| 7000058  | 0.52368 | ni     | uncharacterized conserved protein                                  | um11478   | 0.43681 | ni     | putative protein                                                                  |
| 1200063  | 0.5237  | ni     | hypothetical protein                                               | um00557   | 0.43698 | K01191 | probable AMS1 - alpha-mannosidase                                                 |
| 1900100  | 0.52384 | K15206 | hypothetical protein                                               | um01383   | 0.43712 | ni     | putative protein                                                                  |
| 7000331  | 0.5239  | K06018 | acid sphingomyelinase and PHM5 phosphate metabolism protein        | um10393   | 0.4372  | ni     | conserved hypothetical protein                                                    |
| 8000092  | 0.52394 | K16833 | hypothetical protein                                               | um03821   | 0.4373  | ni     | hypothetical protein                                                              |
| 9000160  | 0.52404 | ni     | hypothetical protein                                               | um00605   | 0.43737 | ni     | related to MIE12 - methyltetrahydrofolate reductase                               |
| 2200072  | 0.52409 | ni     | calcitriol                                                         | um01287   | 0.43752 | ni     | related to NADPH-dependent FMN and FAD containing oxidoreductase                  |
| 7000213  | 0.52406 | K15628 | peroxisomal long-chain acyl-CoA transporter                        | um10193   | 0.43757 | ni     | hypothetical protein                                                              |
| 10000120 | 0.52414 | ni     | hypothetical protein                                               | um11591   | 0.43759 | ni     | related to SSP120 - secretory protein                                             |
| 6000011  | 0.52431 | K01796 | predicted L-carnitine dehydratase                                  | um00071   | 0.43763 | K00809 | probable deoxyhypusine synthase                                                   |
| 22000128 | 0.52435 | ni     | hypothetical protein                                               | um00550   | 0.43766 | ni     | hypothetical protein                                                              |
| 9000086  | 0.52439 | ni     | hypothetical protein                                               | um01430   | 0.43768 | ni     | conserved hypothetical Ustilago-specific protein                                  |
| 5000108  | 0.52451 | ni     | hypothetical protein                                               | um11152   | 0.4381  | ni     | related to 2-amino-3-carboxymuconate-6-semialdehyde decarboxylase                 |
| 2200004  | 0.52485 | ni     | hypothetical protein                                               | um00463   | 0.43828 | K10082 | related to vesicular integral-membrane protein VIP36                              |
| 7000177  | 0.52511 | K15456 | RNA polymerase II elongator associated protein                     | um05471   | 0.43833 | ni     | conserved hypothetical protein                                                    |
| 22000021 | 0.52532 | ni     | hypothetical protein                                               | um04363   | K00968  | ni     | related to choline-phosphate cytidylyltransferase                                 |
| 22000295 | 0.52547 | ni     | hypothetical protein                                               | um10983.2 | 0.43865 | ni     | conserved hypothetical protein                                                    |
| 5000098  | 0.52595 | K06063 | mRNA splicing factor                                               | um11173   | 0.43869 | ni     | putative protein                                                                  |
| 4000010  | 0.52604 | K00327 | NAD(P)FAD dependent oxidoreductase                                 | um03240   | 0.43887 | ni     | related to RUD3 - suppressor of uso1-1 transport defect                           |
| 9000396  | 0.5261  | K03448 | peptidase of the major facilitator superfamily                     | um00621   | 0.43892 | ni     | hypothetical protein                                                              |
| 14000397 | 0.52613 | ni     | hypothetical protein                                               | um00861.2 | 0.43898 | K03256 | related to GCD10 - translation initiation factor eIF3 RNA-binding subunit         |
| 1000078  | 0.52613 | K14686 | copper transporter                                                 | um03422   | 0.43899 | ni     | conserved hypothetical protein                                                    |
| 22000221 | 0.5262  | ni     | hypothetical protein                                               | um11096   | 0.43908 | K17279 | related to YOP1 - Ypt-interacting protein                                         |
| 22000121 | 0.52649 | K03936 | NADH-ubiquinone oxidoreductase, NDUFS3/30 kDa subunit              | um04039   | 0.4391  | ni     | hypothetical protein                                                              |
| 3000005  | 0.52649 | K03245 | hypothetical protein                                               | um00287   | 0.43925 | K15542 | related to PFS2 - polyadenylation factor 1 subunit 2                              |
| 4000021  | 0.52696 | ni     | predicted methyltransferase                                        | um04375   | 0.43931 | K11436 | related to hnRNP arginine N-methyltransferase                                     |
| 9000147  | 0.52731 | ni     | hypothetical protein                                               | um02216   | 0.43948 | K15109 | related to Carrier protein YMC1                                                   |
| 1800042  | 0.52761 | ni     | golgi transport complex COD1 protein                               | um00355   | 0.4395  | ni     | related to ERV25 - component of the COPII-coated vesicles                         |
| 1800099  | 0.52771 | ni     | hypothetical protein                                               | um03782   | 0.4397  | ni     | hypothetical protein                                                              |
| 1300050  | 0.52794 | ni     | hypothetical protein                                               | um02016   | 0.43981 | K17278 | related to Membrane steroid binding protein                                       |
| 19000124 | 0.52803 | ni     | 3-keto steroid reductase                                           | um04809   | 0.43983 | K14823 | related to EBP2 - required for pre-rRNA processing and ribosomal subunit assembly |
| 11000017 | 0.52819 | K11560 | microtubule-associated protein essential for anaphase spindle etc  | um02064   | 0.43985 | K02151 | probable VMA7 - H-ATPase V1 domain 14 kDa subunit                                 |
| 22000129 | 0.52848 | K16732 | microtubule-associated protein essential for anaphase spindle etc  | um11130   | 0.44016 | ni     | conserved hypothetical protein                                                    |
| 8000025  | 0.52852 | ni     | hypothetical protein                                               | um00383   | 0.44039 | K12837 | related to pre-mRNA splicing factor UZAF large chain                              |
| 13000109 | 0.52854 | ni     | protein involved in sister chromatid separation and/or segregation | um04722   | 0.4405  | K03012 | related to Rpb4 - 16 kD subunit of DNA-directed RNA polymerase II                 |
| 6000125  | 0.52855 | K06671 | sister chromatid cohesion complex Cohesin, subunit STAG1/IRR1      | um03534   | 0.44065 | ni     | putative protein                                                                  |
| 5000116  | 0.52876 | K10739 | single-stranded DNA-binding replication protein A                  | um03752   | 0.44071 | ni     | conserved hypothetical Ustilago-specific protein                                  |
| 9000307  | 0.52876 | K09252 | hypothetical protein                                               | um00232   | 0.44084 | ni     | conserved hypothetical protein                                                    |
| 22000119 | 0.529   | ni     | transcription-associated recombination protein - Thp1p             | um02918   | 0.44103 | K03128 | related to TIF2 - component of TFIID complex                                      |
| 5000033  | 0.52909 | K14863 | predicted E3 ubiquitin ligase                                      | um12264   | 0.44144 | ni     | putative protein                                                                  |
| 3000064  | 0.52929 | ni     | inositol phospholipid synthesis protein                            | um11540   | 0.44162 | ni     | related to carboxylesterase                                                       |
| 19000114 | 0.52968 | K06963 | THUMP domain-containing proteins                                   | um11325   | 0.4417  | ni     | related to VPS17 - vacuolar protein sorting-associated protein                    |
| 24000059 | 0.53019 | ni     | hypothetical protein                                               | um00719.2 | 0.44171 | ni     | putative protein                                                                  |
| 1000021  | 0.53052 | K05770 | peripheral-type benzodiazepine receptor and related proteins       | um01964   | 0.44188 | ni     | related to multidrug resistance protein                                           |
| 6000100  | 0.53063 | ni     | FYVE finger containing protein                                     | um11649   | 0.44195 | ni     | related to D-amino acid oxidase                                                   |
| 7000067  | 0.53077 | K10427 | dynactin, subunit p25                                              | um00140   | 0.44218 | K05542 | related to RNA dihydrouridine synthase                                            |
| 20000009 | 0.53101 | ni     | hypothetical protein                                               | um06102   | 0.44222 | ni     | related to Glucan 1                                                               |
| 7000155  | 0.53111 | K07374 | alpha Lact III                                                     | um06152   | 0.44222 | ni     | putative protein                                                                  |
| 1600042  | 0.53184 | ni     | uncharacterized conserved protein                                  | um02313   | 0.44233 | ni     | hypothetical protein                                                              |
| 1600023  | 0.53206 | ni     | hypothetical protein                                               | um01072   | 0.4424  | ni     | conserved hypothetical protein                                                    |
| 7000048  | 0.53313 | K05757 | actin-related protein Arp2/3 complex, subunit ARPC1/p41-ARC        | um02218   | 0.44244 | K01738 | related to cysteine synthase                                                      |
| 10000361 | 0.53321 | ni     | hypothetical protein                                               | um01388   | 0.44258 | ni     | hypothetical protein                                                              |
| 18000019 | 0.53343 | K00290 | lysine-ketoglutarate reductase                                     | um10326.2 | 0.44272 | K00971 | probable Mannose-1-phosphate guanylyltransferase                                  |
| 13000042 | 0.53346 | K01196 | alpha amylase                                                      | um02327   | 0.44277 | K14169 | hypothetical protein                                                              |
| 26000004 | 0.53354 | ni     | predicted transporter                                              | um01055   | 0.44295 | ni     | ni                                                                                |
| 7000312  | 0.53375 | K16466 | Ca2+-binding protein                                               | um10306   | 0.44317 | K01426 | related to Serine                                                                 |
| 20000017 | 0.53451 | ni     | hypothetical protein                                               | um11226   | 0.44327 | ni     | conserved hypothetical protein                                                    |
| 9000338  | 0.5347  | K13511 | phosphate acyltransferase                                          | um00055   | 0.4433  | K10134 | conserved hypothetical protein                                                    |
| 2600042  | 0.53495 | ni     | hypothetical protein                                               | um10884   | 0.44365 | K16075 | related to LPE10 - strong similarity to Mrs2p                                     |
| 1000044  | 0.53496 | ni     | transcription factor ely2                                          | um00632   | 0.44368 | ni     | putative protein                                                                  |
| 7000340  | 0.53506 | K02957 | 40S ribosomal protein S15/S22                                      | um00358   | 0.44386 | ni     | related to YFP1                                                                   |
| 9000109  | 0.53514 | ni     | sister chromatid cohesion complex Cohesin, subunit RAD21/SCC       | um04724   | 0.44391 | ni     | conserved hypothetical protein                                                    |
| 24000013 | 0.53519 | ni     | hypothetical protein                                               | um10628   | 0.44404 | ni     | conserved hypothetical protein                                                    |
| 26000031 | 0.53521 | K00253 | isovaleryl-coa dehydrogenase                                       | um00189   | 0.44413 | ni     | related to ESF1 - 18S rRNA factor                                                 |
| 26000041 | 0.53539 | ni     | ubiquitin cytochrome c reductase assembly protein CBP3             | um02186   | 0.44422 | ni     | conserved hypothetical protein                                                    |
| 3000003  | 0.53544 | K11271 | FOG, Predicted E3 ubiquitin ligase                                 | um02343   | 0.44426 | K14833 | related to exon repair protein RAD4                                               |
| 22000270 | 0.53556 | ni     | hypothetical protein                                               | um00312   | 0.44435 | ni     | conserved hypothetical protein                                                    |
| 12000117 | 0.53557 | ni     | hypothetical protein                                               | um03353   | 0.44465 | K11863 | related to ataxin-3                                                               |
| 7000202  | 0.53592 | ni     | hypothetical protein                                               | um11082   | 0.4447  | ni     | hypothetical protein                                                              |
| 7000207  | 0.53593 | ni     | hypothetical protein                                               | um11559   | 0.44478 | K09927 | conserved hypothetical protein                                                    |
| 16000088 | 0.53601 | ni     | hypothetical protein                                               | um12289   | 0.4448  | K00859 | conserved hypothetical protein                                                    |
| 9000240  | 0.53618 | ni     | hypothetical protein                                               | um02263   | 0.44527 | K01304 | conserved hypothetical protein                                                    |
| 22000445 | 0.5362  | ni     | putative mitochondrial/chloroplast ribosomal protein L45           | um00167   | 0.44533 | ni     | conserved hypothetical protein                                                    |
| 1000011  | 0.53638 | K13095 | splicing factor 1/branch point binding protein                     | um00274   | 0.44543 | K02218 | probable casein kinase I                                                          |
| 18000006 | 0.53646 | ni     | hypothetical protein                                               | um01978   | 0.44552 | ni     | conserved hypothetical protein                                                    |
| 13000036 | 0.53648 | K00924 | serine/threonine protein kinase                                    | um05873   | 0.44554 | ni     | related to TIF2 - translation initiation factor eIF4A                             |
| 9000158  | 0.53652 | K02331 | predicted regulator of rRNA gene transcription                     | um01271   | 0.44576 | ni     | related to NAM8 - meiotic recombination protein                                   |
| 7000281  | 0.53663 | ni     | hypothetical protein                                               | um03908   | 0.4458  | ni     | related to RRP14 - protein involved in Ribosomal RNA Processing                   |
| 10000042 | 0.53699 | K01930 | folylpolyglutamate synthase                                        | um01789   | 0.44587 | ni     | related to ERG28 - involved in synthesis of ergosterol                            |
| 14000083 | 0.53696 | ni     | hypothetical protein                                               | um04607   | 0.44588 | ni     | related to Asparaginyl-tRNA synthetase                                            |
| 20000072 | 0.53696 | ni     | hypothetical protein                                               | um04782   | 0.4459  | K01885 | probable GUS1 - Glutamyl-tRNA synthetase                                          |
| 18000075 | 0.53714 | ni     | hypothetical protein                                               | um05209   | 0.44625 | K03844 | related to ALG11 - required for asparagine-linked glycosylation                   |
| 19000016 | 0.53734 | K16261 | amino acid transporters                                            | um11021   | 0.44638 | ni     | probable mitochondrial precursor protein import receptor tom70                    |
| 19000120 | 0.53766 | K12842 | predicted splicing regulator                                       | um04987   | 0.44644 | K02146 | probable vacuolar atp synthase subunit d                                          |
| 5000037  | 0.53777 | ni     | hypothetical protein                                               | um04987   | 0.44648 | ni     | conserved hypothetical protein                                                    |
| 26000018 | 0.53798 | ni     | hypothetical protein                                               | um11058   | 0.44651 | ni     | conserved hypothetical Ustilago-specific protein                                  |
| 13000086 | 0.53836 | K06875 | apoptosis-related protein                                          | um11749   | 0.4466  | K03246 | probable TIF34 - translation initiation factor eIF3                               |
| 2000003  | 0.53845 | K14777 | ATP-dependent RNA helicase                                         | um10306   | 0.44678 | ni     | conserved hypothetical protein                                                    |
| 9000288  | 0.53873 | K00921 | phosphatidylinositol-4-phosphate 5-kinase                          | um01776   | 0.44707 | ni     | conserved hypothetical protein                                                    |
| 5000113  | 0.5388  | K01106 | inositol-1,4,5-trisphosphate 5-phosphatase                         | um04016   | 0.44716 | ni     | hypothetical protein                                                              |
| 19000003 | 0.53898 | ni     | membrane coat complex Retromer, subunit VPS5/SNX1                  | um05026   | 0.44722 | ni     | related to NSP1 - nuclear pore protein                                            |
| 7000172  | 0.53934 | ni     | membrane coat complex Retromer, subunit VPS5/SNX1                  | um10809.2 | 0.44734 | ni     | related to GTPase-activating protein beta-chimerin                                |
| 26000022 | 0.53985 | ni     | DHHC-type Zn-finger proteins                                       | um03827   | 0.44747 | ni     | hypothetical protein                                                              |
| 6000135  | 0.53986 | K01870 | isoleucyl-tRNA synthetase                                          | um10830   | 0.44839 | K15363 | conserved hypothetical protein                                                    |
| 2000068  | 0.54024 | ni     | hypothetical protein                                               | um01009   | 0.4484  | K00693 | probable glycogen synthase                                                        |
| 9000122  | 0.54031 | ni     | hypothetical protein                                               | um11106   | 0.44852 | ni     | conserved hypothetical protein                                                    |
| 22000120 | 0.54039 | ni     | hypothetical protein                                               | um01217   | 0.44861 | ni     | hypothetical protein                                                              |
| 15000065 | 0.54098 | ni     | hypothetical protein                                               | um11510   | 0.44864 | K12200 | conserved hypothetical protein                                                    |
| 9000372  | 0.54128 | ni     | oxidation resistance protein                                       | um02294   | 0.44886 | ni     | conserved hypothetical Ustilago-specific protein                                  |
| 9000295  | 0.54143 | ni     | hypothetical protein                                               | um02049   | 0.4491  | ni     | putative protein                                                                  |
| 11000038 | 0.54146 | ni     | predicted metal-dependent hydrolase of the TIM-barrel fold         | um01375   | 0.44924 | ni     | hypothetical protein                                                              |
| 26000078 | 0.5415  | K1923  | phosphoribosylamidoimidazole-succinocarboxamide synthase           | um05928   | 0.44957 | ni     | conserved hypothetical Ustilago-specific protein                                  |
| 22000163 | 0.5417  | ni     | hypothetical protein                                               | um05994   | 0.44958 | ni     | conserved hypothetical protein                                                    |
| 5000019  | 0.54171 | K02325 | DNA polymerase epsilon, subunit B                                  | um02609   | 0.44966 | K12833 | conserved hypothetical protein                                                    |
| 8000041  | 0.5419  | K03011 | RNA polymerase II, subunit POLR2C/RPB3                             | um02851   | 0.44968 | ni     | putative protein                                                                  |
| 7000269  | 0.54208 | K01104 | dual specificity phosphatase                                       | um02055   | 0.44983 | K14408 | related to RNA14 - component of pre-mRNA 3                                        |
| 5000162  | 0.54222 | K01213 | hypothetical protein                                               | um01042   | 0.44991 | ni     | putative protein                                                                  |
| 25000070 | 0.54237 | ni     | mitochondrial associated endonuclease MAR1                         | um04257   | 0.44992 | ni     | hypothetical protein                                                              |
| 15000003 | 0.54273 | ni     | hypothetical protein                                               | um10099   | 0.44995 | ni     | conserved hypothetical protein                                                    |
| 10000043 | 0.54286 | K01658 | ATPase component of ABC transporters with duplicated ATPase        | um01058   | 0.44987 | K12389 | probable APS3 - AP-3 complex subunit                                              |
| 22000109 | 0.54287 | K12199 | uncharacterized conserved protein                                  | um06238   | 0.45001 | K02858 | probable RIB3 - 3                                                                 |
| 9000308  | 0.54288 | ni     | protein phosphatase, regulatory subunit PPP1R3C/D                  | um00662   | 0.45038 | ni     | ni                                                                                |
| 19000007 | 0.54306 | ni     | hypothetical protein                                               | um11619   | 0.45064 | K02891 | probable ribosomal protein L22                                                    |
| 15000006 | 0.54343 | K12662 | U4/U6 small nuclear ribonucleoprotein Prp4                         | um02638   | 0.45068 | K07870 | conserved hypothetical protein                                                    |
| 26000089 | 0.54352 | ni     | hypothetical protein                                               | um15005   | 0.4509  | K11541 | probable URA2 - multifunctional pyrimidine biosynthesis protein                   |
| 9000108  | 0.54358 | K11557 | hyp                                                                |           |         |        |                                                                                   |

|          |         |        |                                                                    |           |         |        |                                                                                   |
|----------|---------|--------|--------------------------------------------------------------------|-----------|---------|--------|-----------------------------------------------------------------------------------|
| 15c00074 | 0.54694 | K03142 | RNA polymerase II transcription initiation/nucleotide excision rep | um06334   | 0.45407 | ni     | related to beta 1                                                                 |
| 18c00096 | 0.54773 | K01077 | alkaline phosphatase                                               | um02370   | 0.45431 | ni     | hypothetical protein                                                              |
| 14d00048 | 0.54616 | ni     | DNA polymerase epsilon, subunit D                                  | um11444   | 0.45438 | ni     | conserved hypothetical Ustilago-specific protein                                  |
| 7c00395  | 0.54822 | K01209 | hypothetical protein                                               | um03273   | 0.45448 | ni     | related to Tlo elongation aberrant protein 1                                      |
| 22c00068 | 0.54824 | ni     | aldo/keto reductase family proteins                                | um04960   | 0.45494 | K02950 | related to 30S ribosomal protein S12                                              |
| 13d00084 | 0.54827 | ni     | hypothetical protein                                               | um06304.2 | 0.45523 | ni     | conserved hypothetical protein                                                    |
| 7d00298  | 0.54832 | K16570 | gamma-tubulin complex, DGRIP91/SPC98 component                     | um06434   | 0.4553  | ni     | conserved hypothetical protein                                                    |
| 7c00134  | 0.54833 | ni     | hypothetical protein                                               | um03843   | 0.45539 | ni     | probable FMP43 - protein found in mitochondrial proteome                          |
| 25c00039 | 0.54843 | ni     | hypothetical protein                                               | um03045.2 | 0.45583 | ni     | related to BSD2 - metal homeostasis protein                                       |
| 19c00117 | 0.54848 | K14407 | mRNA cleavage and polyadenylation factor I complex, subunit Rf     | um10579   | 0.45593 | K02180 | related to mitotic checkpoint protein BUB3                                        |
| 7d00125  | 0.54859 | K00511 | squalene monooxygenase                                             | um04900   | 0.45627 | K11293 | related to histone transcription regulator HIP1                                   |
| 7d00271  | 0.54875 | K10862 | hypothetical protein                                               | um00805   | 0.45659 | ni     | hypothetical protein                                                              |
| 7c00009  | 0.54891 | ni     | flavin-containing monooxygenase                                    | um02489   | 0.45664 | ni     | putative protein                                                                  |
| 7d00018  | 0.549   | K04076 | mitochondrial chaperonin                                           | um15035   | 0.45685 | ni     | related to 60S ribosomal protein l7                                               |
| 12d00117 | 0.54901 | K01736 | chormate synthase                                                  | um00667   | 0.45691 | K12872 | related to Pre-mRNA-splicing factor RBM22                                         |
| 19c00120 | 0.54901 | ni     | hypothetical protein                                               | um03314   | 0.45697 | ni     | effector family protein Eff1-4                                                    |
| 14c00130 | 0.5492  | ni     | dehydrogenase with different specificities                         | um11710   | 0.45704 | K14560 | probable IMP5 - component of the U3 small nuclear ribonucleoprotein               |
| 8c00012  | 0.54922 | K01077 | alkaline phosphatase                                               | um03148   | 0.45719 | ni     | related to ATP-binding cassette protein                                           |
| 9d00269  | 0.54958 | ni     | hypothetical protein                                               | um03540   | 0.4572  | ni     | conserved hypothetical protein                                                    |
| 9c00242  | 0.54959 | ni     | hypothetical protein                                               | um02308   | 0.45738 | ni     | hypothetical protein                                                              |
| 5d00350  | 0.54969 | K03106 | signal recognition particle, subunit Srp54                         | um10232   | 0.45768 | ni     | probable cytochrome b5                                                            |
| 11d00046 | 0.5499  | ni     | subtilisin-related protease                                        | um03832   | 0.45782 | ni     | related to BNA2 - tytophphan 2                                                    |
| 7c00345  | 0.55001 | ni     | hypothetical protein                                               | um02614   | 0.45784 | K14154 | related to thiamine-phosphate diphosphorylase                                     |
| 10d00010 | 0.55005 | K01939 | adenylsuccinate synthase                                           | um06413   | 0.45785 | ni     | putative protein                                                                  |
| 15c00038 | 0.55008 | ni     | hypothetical protein                                               | um10050   | 0.45785 | K12624 | probable U6 snRNA-associated Sm-like protein LSm5                                 |
| 12d00136 | 0.55009 | K11423 | clathrin coat binding protein                                      | um10286   | 0.45791 | ni     | related to KES1 - member of an cytoskeleton-binding protein family                |
| 22d00240 | 0.55013 | K00854 | sugar (pentulose and hexulose) kinases                             | um11484   | 0.45807 | ni     | hypothetical protein                                                              |
| 19c00150 | 0.55042 | ni     | hypothetical protein                                               | um11309   | 0.45852 | K12768 | related to coatomer epsilon subunit                                               |
| 22d00193 | 0.55062 | ni     | hypothetical protein                                               | um01944   | 0.45858 | ni     | related to allantoinase permease                                                  |
| 9d00383  | 0.55073 | ni     | uncharacterized conserved protein TEX2                             | um05017.2 | 0.4586  | ni     | putative protein                                                                  |
| 2d000028 | 0.55075 | ni     | dehydrogenase kinase                                               | 0.45861   | K01950  |        | probable ONS1 - Glutamine-dependent NAD Synthetase                                |
| 11d00036 | 0.55086 | ni     | hypothetical protein                                               | um01610   | 0.45864 | ni     | conserved hypothetical protein                                                    |
| 18d00037 | 0.55087 | ni     | predicted membrane protein                                         | um10324   | 0.45867 | ni     | putative protein                                                                  |
| 8c00048  | 0.55096 | ni     | aromatic amino acid aminotransferase and related proteins          | um10988   | 0.45871 | K11827 | probable clathrin coat assembly protein ap17                                      |
| 22d00208 | 0.55097 | ni     | predicted Phf1-Phf2-type epimerase                                 | um15041   | 0.45872 | ni     | conserved hypothetical protein                                                    |
| 15c00069 | 0.55118 | ni     | vacuolar sorting protein PEP3/VPS18                                | um03699   | 0.45886 | K01922 | conserved hypothetical protein                                                    |
| 27c00056 | 0.55121 | ni     | hypothetical protein                                               | um04348   | 0.45887 | K03380 | probable phenol 2-monooxygenase                                                   |
| 19d00035 | 0.55141 | ni     | golgi-associated protein                                           | um04750   | 0.45891 | ni     | conserved hypothetical protein                                                    |
| 2d00041  | 0.55141 | ni     | hypothetical protein                                               | um11250   | 0.45917 | ni     | Mig2-3                                                                            |
| 15c00061 | 0.55188 | ni     | hypothetical protein                                               | um06162   | 0.45958 | ni     | conserved hypothetical protein                                                    |
| 7c00273  | 0.55245 | ni     | N-methyltransferase                                                | um11623   | 0.45959 | K14539 | probable LSG1 - Large-Subunit GTPase involved in 60S ribosomal subunit biogenesis |
| 12d00077 | 0.55248 | K15305 | uncharacterized conserved protein                                  | um04665   | 0.45993 | K14780 | related to ECM16 - putative DEAH-box RNA helicase                                 |
| 16d00058 | 0.5525  | ni     | predicted Dolichyl-phosphate-mannose-protein mannosyltransfer      | um05978   | 0.46001 | ni     | conserved hypothetical protein                                                    |
| 9c00143  | 0.55261 | ni     | hypothetical protein                                               | um04451   | 0.46007 | K01537 | probable PMR1 - secretory pathway Ca <sup>2+</sup> -transporting P-type ATPase    |
| 12d00061 | 0.55276 | ni     | nuclear-export-signal (NES)-containing protein                     | um10236   | 0.46007 | K02949 | probable RPS11B - ribosomal protein S11B                                          |
| 26d00103 | 0.55278 | ni     | hypothetical protein                                               | um15028   | 0.4601  | K01955 | probable arginine-specific carbamoyl-phosphate synthetase                         |
| 5c00093  | 0.55285 | ni     | urea transporter                                                   | um03515   | 0.46036 | ni     | related to LCB1 - serine C-palmitoyltransferase subunit                           |
| 9c00159  | 0.55297 | ni     | hypothetical protein                                               | um01063   | 0.46034 | K15219 | conserved hypothetical protein                                                    |
| 25d00055 | 0.5532  | ni     | hypothetical protein                                               | um04047   | 0.46058 | K02537 | probable MAD2 - spindle-assembly checkpoint protein                               |
| 7c00224  | 0.55375 | K15219 | hypothetical protein                                               | um06479   | 0.46066 | ni     | conserved hypothetical Ustilago-specific protein                                  |
| 9c00276  | 0.5539  | ni     | hypothetical protein                                               | um11472   | 0.46074 | ni     | putative protein                                                                  |
| 8d00065  | 0.55405 | ni     | hypothetical protein                                               | um10114   | 0.46082 | K02960 | probable 40S ribosomal protein S16                                                |
| 14d00013 | 0.55432 | ni     | hypothetical protein                                               | um12025   | 0.46095 | ni     | conserved hypothetical protein                                                    |
| 10d00109 | 0.55441 | ni     | hypothetical protein                                               | um05863   | 0.46114 | K12160 | related to SMT3 ubiquitin-like protein                                            |
| 9c00186  | 0.55458 | K15201 | RNA polymerase III transcription factor TFIIC                      | um00278   | 0.46118 | ni     | hypothetical protein                                                              |
| 8c00005  | 0.555   | K14575 | AAA-type ATPase                                                    | um02438   | 0.46123 | ni     | related to c1p1                                                                   |
| 22d00002 | 0.55522 | ni     | hypothetical protein                                               | um03681.2 | 0.46123 | ni     | conserved hypothetical protein                                                    |
| 10d00116 | 0.55544 | K14859 | RNA-binding protein required for 60S ribosomal subunit biogenes    | um10285   | 0.46149 | ni     | putative protein                                                                  |
| 27d00032 | 0.55547 | ni     | karyopherin beta 3                                                 | um05804   | 0.46155 | ni     | Cys                                                                               |
| 10d00113 | 0.55551 | ni     | hypothetical protein                                               | um06116   | 0.46172 | ni     | putative protein                                                                  |
| 8d00056  | 0.55554 | K01873 | valyl-trna synthetase                                              | um11291   | 0.46181 | K03064 | probable RPT4 - 26S proteasome regulatory subunit                                 |
| 9c00285  | 0.55595 | K15206 | protein required for fusion of vesicles in vesicular transport     | 0.46187   | ni      |        | related to GDP-glucosylase                                                        |
| 8d00085  | 0.55641 | K01288 | serine carboxypeptidases                                           | um05989   | 0.46202 | ni     | related to 3-oxoadipate enol-lactone hydrolase                                    |
| 7d00037  | 0.55642 | ni     | serine racemase                                                    | um11361.2 | 0.46255 | ni     | related to branched chain alpha-ketoacid dehydrogenase kinase                     |
| 9c00402  | 0.55669 | ni     | hypothetical protein                                               | um04203   | 0.46313 | ni     | conserved hypothetical protein                                                    |
| 9c00263  | 0.5567  | ni     | hypothetical protein                                               | um05068   | 0.46322 | K01130 | probable Arylsulfatase                                                            |
| 11c00067 | 0.55684 | ni     | predicted transporter                                              | um01916   | 0.46336 | ni     | conserved hypothetical protein                                                    |
| 19d00051 | 0.55703 | ni     | hypothetical protein                                               | um12307   | 0.46357 | K15424 | conserved hypothetical protein                                                    |
| 14d00032 | 0.55715 | ni     | hypothetical protein                                               | um10416   | 0.46368 | ni     | conserved hypothetical protein                                                    |
| 22c00217 | 0.55716 | ni     | regulatory protein MLP and related LIM proteins                    | um11436   | 0.46407 | K03521 | probable electron transfer flavoprotein beta chain                                |
| 22c00190 | 0.55723 | ni     | predicted membrane protein                                         | 0.46408   | ni      |        | conserved hypothetical protein                                                    |
| 22d00057 | 0.55727 | ni     | uncharacterized conserved protein                                  | um01102   | 0.46478 | ni     | putative protein                                                                  |
| 19c00004 | 0.55737 | ni     | hypothetical protein                                               | um05741   | 0.46488 | ni     | conserved hypothetical protein                                                    |
| 11d00066 | 0.55767 | ni     | hypothetical protein                                               | um02622   | 0.46492 | K01560 | conserved hypothetical protein                                                    |
| 9c00263  | 0.55771 | ni     | hypothetical protein                                               | um03636   | 0.46501 | ni     | conserved hypothetical Ustilago-specific protein                                  |
| 7d00208  | 0.55794 | ni     | FOG, PPR repeat                                                    | um05337   | 0.46538 | ni     | related to SLA1 - cytoskeleton assembly control protein                           |
| 9c00152  | 0.55813 | ni     | dihydropyrimidine acetyltransferase                                | um04066   | 0.46618 | ni     | conserved hypothetical protein                                                    |
| 9c00331  | 0.55822 | ni     | 5' nucleotidase                                                    | um00195   | 0.46629 | ni     | putative protein                                                                  |
| 7c00202  | 0.55835 | ni     | hypothetical protein                                               | um11352   | 0.4663  | K01441 | related to neutral ceramidase                                                     |
| 7d00109  | 0.55893 | ni     | hypothetical protein                                               | um05009   | 0.46678 | ni     | hypothetical protein                                                              |
| 9c00010  | 0.55867 | ni     | hypothetical protein                                               | um11561   | 0.46683 | K02903 | related to 60S ribosomal protein L28                                              |
| 9c00390  | 0.55875 | ni     | predicted transporter                                              | um04503   | 0.467   | ni     | related to Alpha-N-acetylgalactosaminidase precursor                              |
| 2d00051  | 0.55886 | ni     | hypothetical protein                                               | um04034   | 0.46732 | ni     | conserved hypothetical Ustilago-specific protein                                  |
| 22d00301 | 0.55897 | ni     | hypothetical protein                                               | um05501   | 0.46746 | ni     | TPR-containing protein Mgl1                                                       |
| 19c00138 | 0.55935 | ni     | hypothetical protein                                               | um06241   | 0.46749 | ni     | putative protein                                                                  |
| 6d00114  | 0.55962 | K08770 | ubiquitin and ubiquitin-like proteins                              | um10255   | 0.4677  | ni     | putative protein                                                                  |
| 19c00121 | 0.55969 | K11584 | serine/threonine protein phosphatase 2A, regulatory subunit        | um10704   | 0.4677  | ni     | conserved hypothetical protein                                                    |
| 9d00129  | 0.55985 | K02437 | glycine cleavage system H protein                                  | um01654   | 0.46783 | ni     | conserved hypothetical protein                                                    |
| 6d00094  | 0.55986 | K03039 | proteins containing the FAD binding domain                         | um02287   | 0.46793 | ni     | hypothetical protein                                                              |
| 16d00004 | 0.56049 | ni     | hypothetical protein                                               | um03456   | 0.46814 | ni     | putative protein                                                                  |
| 9c00257  | 0.56057 | ni     | hypothetical protein                                               | um10993   | 0.46822 | ni     | conserved hypothetical protein                                                    |
| 15c00087 | 0.56064 | ni     | hypothetical protein                                               | um10549   | 0.46832 | K14840 | related to Glioma tumor suppressor candidate region gene 2 protein                |
| 11c00070 | 0.56119 | ni     | hypothetical protein                                               | um00221   | 0.4686  | ni     | conserved hypothetical protein                                                    |
| 16c00036 | 0.5614  | K11672 | actin-related protein - Arp5p                                      | um06167   | 0.46869 | K06639 | related to CDC14 - dual specificity phosphatase                                   |
| 12d00042 | 0.5619  | ni     | hypothetical protein                                               | um02378   | 0.46875 | K14007 | related to Protein transport protein Sec24C                                       |
| 22c00264 | 0.56202 | ni     | hypothetical protein                                               | um00414   | 0.46891 | ni     | conserved hypothetical protein                                                    |
| 7d00011  | 0.56206 | ni     | hypothetical protein                                               | um01202   | 0.46909 | ni     | hypothetical protein                                                              |
| 0.56209  | 0.5621  | ni     | animal one fatty acid synthase and related proteins                | um03439   | 0.46913 | ni     | hypothetical Ustilago-specific protein                                            |
| 9c00315  | 0.56232 | K00772 | methylthioadenosine phosphorylase MTAP                             | um05005   | 0.46919 | ni     | related to 30S ribosomal protein S17                                              |
| 14d00014 | 0.56263 | ni     | serine/threonine protein kinase                                    | um10226   | 0.46924 | K06268 | probable CNB1 - calcineurin B                                                     |
| 14d00026 | 0.56264 | ni     | hypothetical protein                                               | um12327   | 0.46928 | K15376 | related to Gephyrin                                                               |
| 12d00076 | 0.56267 | ni     | FOG, Zn-finger                                                     | um16822   | 0.46938 | K07556 | related to ATP12 - F1F0-ATPase complex assembly protein                           |
| 9c00344  | 0.56281 | ni     | hypothetical protein                                               | um04238   | 0.46962 | ni     | related to poly                                                                   |
| 7d00242  | 0.56283 | K15193 | hypothetical protein                                               | um10102   | 0.46962 | ni     | related to SLY1 protein                                                           |
| 9d00235  | 0.56294 | ni     | hypothetical protein                                               | um04294   | 0.46968 | K13352 | related to peroxin-11                                                             |
| 7d00351  | 0.56308 | ni     | hypothetical protein                                               | um11916   | 0.46987 | ni     | probable MRPL31 - mitochondrial ribosomal protein                                 |
| 22c00050 | 0.56312 | ni     | hypothetical protein                                               | um10843   | 0.47001 | ni     | putative protein                                                                  |
| 2c00072  | 0.56357 | ni     | hypothetical protein                                               | um10369   | 0.47031 | K00568 | related to COQ3 - enzyme of ubiquinone                                            |
| 12d00106 | 0.56377 | K10753 | histone chaperone                                                  | um02982   | 0.47058 | K05857 | related to PLC1 - 1-phosphatidylinositol-4                                        |
| 12c00063 | 0.56383 | K03660 | 8-oxoguanine DNA glycosylase                                       | um01240   | 0.47063 | ni     | conserved hypothetical Ustilago-specific protein                                  |
| 18d00102 | 0.56388 | ni     | uroporphyrinogen III synthase UROS/HEM4                            | um10068   | 0.47102 | ni     | related to Acid phosphatase precursor                                             |
| 9c00286  | 0.5642  | ni     | hypothetical protein                                               | um04238   | 0.47107 | ni     | conserved hypothetical protein                                                    |
| 7d00002  | 0.56445 | ni     | serine/threonine protein phosphatase                               | um04672   | 0.47126 | K01098 | related to CTL1 - RNA 5                                                           |
| 9c00216  | 0.56447 | ni     | hypothetical protein                                               | um11334   | 0.47127 | K00599 | related to RMT2 - protein-arginine N-methyltransferase                            |
| 12d00046 | 0.56478 | ni     | peroxisomal NUDIX hydrolase                                        | um00236   | 0.47128 | ni     | conserved hypothetical Ustilago-specific protein                                  |
| 15d00086 | 0.56495 | ni     | hypothetical protein                                               | um05389   | 0.47148 | ni     | putative protein                                                                  |
| 8c00025  | 0.56503 | ni     | hypothetical protein                                               | um11706   | 0.47197 | ni     | putative protein                                                                  |
| 18d00113 | 0.5651  | ni     | acetylcholinesterase                                               | um10100   | 0.47209 | K10734 | conserved hypothetical protein                                                    |
| 7d00159  | 0.56548 | ni     | hypothetical protein                                               | um11997   | 0.47222 | ni     | probable ZPR1 - protein binds to translation elongation factor eEF-1              |
| 8d00108  | 0.56565 | K00641 | hypothetical protein                                               | um06243   | 0.47227 | ni     | conserved hypothetical protein                                                    |
| 19d00031 | 0.56567 | ni     | hypothetical protein                                               | um11225   | 0.47231 | K02895 | conserved hypothetical protein                                                    |
| 11c00089 | 0.5657  | ni     | tad-related DNase                                                  | um11743   | 0.47266 | K02260 | related to COX17 - Cytochrome c oxidase copper chaperone                          |
| 12c00091 | 0.56581 | K01626 | hypothetical protein                                               | um11078   | 0.47287 | ni     | conserved hypothetical protein                                                    |
| 12c00118 | 0.56588 | ni     | hypothetical protein                                               | um00671   | 0.47293 | ni     | putative protein                                                                  |
| 12c00028 | 0.56589 | K14538 | GTPase                                                             | um04040   | 0.47344 | ni     | hypothetical protein                                                              |
| 5d00113  | 0.56591 | ni     | hypothetical protein                                               | um02402   | 0.47372 | ni     | conserved hypothetical protein                                                    |
| 9d00267  | 0.56599 | K00286 | pyrroline-5-carboxylate reductase                                  | um01761   | 0.47372 | ni     | conserved hypothetical protein                                                    |
| 24c00064 | 0.56609 | ni     | urea transporter                                                   | um02014   | 0.4738  | ni     | conserved hypothetical protein                                                    |
| 5c00144  | 0.56611 | ni     | hypothetical protein                                               | um12239   | 0.47388 | K07478 | related to MGS1 - Maintenance of Genome Stability 1                               |
| 13c00043 | 0.5662  | ni     | hypothetical protein                                               | um03262   | 0.47399 | ni     | conserved hypothetical Ustilago-specific protein                                  |
| 13c00031 | 0.56639 | ni     | extracellular protein SEL-1 and related proteins                   | um12287   | 0.474   | ni     | conserved hypothetical protein                                                    |
| 7c00225  | 0.56662 | K10684 | SMT3/SUMO-activating complex, AOS1/RAD31 component                 | um01465   | 0.47409 | ni     | conserved hypothetical protein                                                    |
| 18d00045 | 0.56667 | K15076 | RNA polymerase II transcription elongation factor Elongin/SIII, su | um03744   | 0.47418 | ni     | hypothetical protein                                                              |
| 19d0146  | 0.567   | ni     | hypothetical protein                                               | um03262   | 0.47444 | K14544 | conserved hypothetical protein                                                    |
| 10c00026 | 0.56719 | ni     | ras-related GTPase                                                 | um11628   | 0.4745  | ni     | hypothetical protein                                                              |
| 7d00112  | 0.56748 | K14787 | RNA-binding protein                                                | um11760.2 | 0.47468 | K03065 | probable RPT5 - 26S proteasome regulatory subunit                                 |
| 5d00010  | 0.56766 | ni     | hypothetical protein                                               | um01285   | 0.47489 | ni     |                                                                                   |

|          |         |        |                                                                     |           |         |        |                                                                               |
|----------|---------|--------|---------------------------------------------------------------------|-----------|---------|--------|-------------------------------------------------------------------------------|
| 12c00061 | 0.57194 | ni     | hypothetical protein                                                | um12152   | 0.47844 | ni     | conserved hypothetical protein                                                |
| 18d00036 | 0.57214 | ni     | predicted seven transmembrane receptor - rhodopsin family           | um04228   | 0.47859 | K08486 | related to SSO1 - syntaxin-related protein                                    |
| 13d00094 | 0.57254 | ni     | flavonol reductase                                                  | um03702   | 0.47867 | K12585 | probable D3S3                                                                 |
| 2c00081  | 0.57267 | ni     | aspartyl protease                                                   | um04948   | 0.47884 | K01868 | probable THS5 - threonyl tRNA synthetase                                      |
| 9c00368  | 0.57269 | K12391 | vesicle coat complex AP-1, gamma subunit                            | um02631   | 0.47887 | K06997 | conserved hypothetical protein                                                |
| 26c00015 | 0.57277 | ni     | uncharacterized conserved protein                                   | um15086.2 | 0.47905 | ni     | conserved hypothetical protein                                                |
| 9c00387  | 0.57284 | ni     | sec5 subunit of exocyst complex                                     | um04674   | 0.47939 | ni     | related to YB11 - Vacuolar                                                    |
| 5c00099  | 0.57285 | ni     | hypothetical protein                                                | um10165   | 0.47926 | ni     | related to Ngg1-interacting factor 3                                          |
| 22d00020 | 0.57305 | K14403 | mRNA cleavage and polyadenylation factor II complex, BRRS           | um12215   | 0.47934 | ni     | hypothetical protein                                                          |
| 14d00025 | 0.57336 | ni     | hypothetical protein                                                | um05383   | 0.47946 | ni     | conserved hypothetical protein                                                |
| 10d00106 | 0.57358 | ni     | hypothetical protein                                                | um00468   | 0.47955 | ni     | related to SPA2 protein                                                       |
| 12c00129 | 0.57394 | K02264 | cytochrome c oxidase, subunit Va/COX6                               | um00596   | 0.47981 | ni     | hypothetical protein                                                          |
| 7c00194  | 0.57428 | ni     | hypothetical protein                                                | um10035   | 0.47982 | K12398 | related to AP-3 adaptor complex mu3A subunit                                  |
| 24c00010 | 0.57455 | ni     | hypothetical protein                                                | um05695   | 0.48013 | K03267 | probable SUP35 - eukaryotic peptide chain release factor GTP-binding subunit  |
| 6d00034  | 0.57468 | ni     | hypothetical protein                                                | um00388   | 0.48017 | ni     | hypothetical protein                                                          |
| 9d00213  | 0.57471 | ni     | hypothetical protein                                                | um05266   | 0.48029 | ni     | ni                                                                            |
| 15d00061 | 0.57488 | ni     | hypothetical protein                                                | um10548   | 0.48041 | K02127 | probable H -transporting two-sector ATPase chain b precursor                  |
| 3c00027  | 0.57508 | ni     | hypothetical protein                                                | um00930   | 0.48073 | ni     | conserved hypothetical Ustilago-specific protein                              |
| 16c00084 | 0.57538 | K00052 | 3-isopropylmalate dehydrogenase                                     | um03730.2 | 0.48081 | ni     | putative protein                                                              |
| 6c00085  | 0.5757  | K06877 | predicted ATP-dependent RNA helicase                                | um03829.2 | 0.48102 | ni     | hypothetical protein                                                          |
| 22c00259 | 0.57579 | ni     | CCAAT binding factor, subunit C                                     | um03609   | 0.48106 | K14855 | probable RSA4 - WD-repeat protein involved in ribosome biogenesis             |
| 5c00036  | 0.57585 | K01228 | glucosidase                                                         | um05338   | 0.48118 | ni     | related to transcription factor MBP1                                          |
| 7c00189  | 0.57587 | K10967 | glycolipid 2-alpha-mannosyltransferase                              | um10756   | 0.48147 | ni     | conserved hypothetical protein                                                |
| 18d00104 | 0.57603 | ni     | permease of the drug/metabolite transporter                         | um11837   | 0.48192 | ni     | conserved hypothetical protein                                                |
| 26c00045 | 0.57624 | ni     | hypothetical protein                                                | um04196   | 0.48199 | K10424 | conserved hypothetical protein                                                |
| 8c00113  | 0.57629 | ni     | hypothetical protein                                                | um05158   | 0.48223 | K14297 | related to Nucleoporin nup189                                                 |
| 27d00013 | 0.57683 | ni     | mitochondrial/chloroplast ribosomal protein L2                      | um10063   | 0.4826  | K09008 | conserved hypothetical protein                                                |
| 11c00011 | 0.57686 | K10597 | ubiquitin fusion degradation protein-2                              | um04932   | 0.48266 | ni     | related to ATG18 - Phosphatidylinositol 3                                     |
| 26c00063 | 0.57703 | ni     | hypothetical protein                                                | um11792   | 0.48278 | K07950 | conserved hypothetical protein                                                |
| 9c00321  | 0.57706 | K02989 | ribosomal protein S7                                                | um01648   | 0.48333 | ni     | conserved hypothetical protein                                                |
| 3d00035  | 0.57747 | ni     | hypothetical protein                                                | um04908   | 0.48381 | K03245 | conserved hypothetical protein                                                |
| 6c00120  | 0.57752 | K06067 | histone deacetylase complex, catalytic component RPD3               | um10410   | 0.48394 | K13179 | probable HAS1 - helicase associated with Set1p                                |
| 3c00048  | 0.57763 | ni     | hypothetical protein                                                | um00338   | 0.48414 | ni     | conserved hypothetical protein                                                |
| 1c00050  | 0.57769 | K00616 | transaldolase                                                       | um11239   | 0.48446 | ni     | hypothetical protein                                                          |
| 18c00023 | 0.57781 | K00767 | quininate phosphoribosyl transferase                                | um05219   | 0.48468 | ni     | related to andropogonin oxidoreductin 1 precursor                             |
| 6d00133  | 0.57818 | ni     | hypothetical protein                                                | um10958   | 0.48502 | K17261 | related to kinetochore associated 2                                           |
| 19c00079 | 0.57825 | ni     | acyl-coa-binding protein                                            | um10233   | 0.48516 | ni     | conserved hypothetical Ustilago-specific protein                              |
| 18c00021 | 0.57825 | K02911 | predicted membrane protein                                          | um00752   | 0.48522 | ni     | hypothetical protein                                                          |
| 1c00023  | 0.57846 | K02884 | mitochondrial/chloroplast ribosomal protein L19                     | um00259   | 0.48531 | K07739 | probable ELP3 - subunit of elongator                                          |
| 7c00173  | 0.57869 | ni     | hypothetical protein                                                | um15090   | 0.48545 | ni     | conserved hypothetical protein                                                |
| 22d00130 | 0.57861 | ni     | dehydrogenase kinase                                                | um12257   | 0.48551 | ni     | hypothetical protein                                                          |
| 12c00074 | 0.57921 | ni     | microtubule-binding protein                                         | um10228.2 | 0.48582 | ni     | hypothetical protein                                                          |
| 8d00026  | 0.57941 | ni     | hypothetical protein                                                | um12099   | 0.48593 | ni     | conserved hypothetical protein                                                |
| 22c00116 | 0.57935 | ni     | hypothetical protein                                                | um12218   | 0.48618 | K08874 | related to TRX1 - component of the Ada-Spt transcriptional regulatory complex |
| 12d00127 | 0.57962 | ni     | hypothetical protein                                                | um02011   | 0.48645 | ni     | putative protein                                                              |
| 27d00042 | 0.57974 | ni     | molecular chaperone                                                 | um02861   | 0.48683 | ni     | conserved hypothetical protein                                                |
| 14c00080 | 0.5799  | ni     | hypothetical protein                                                | um03966   | 0.48718 | ni     | hypothetical protein                                                          |
| 26c00033 | 0.5802  | ni     | endoplasmic reticulum protein EP58                                  | um02451   | 0.48736 | ni     | conserved hypothetical protein                                                |
| 13d00009 | 0.58023 | ni     | hypothetical protein                                                | um10867   | 0.48742 | ni     | hypothetical protein                                                          |
| 13c00007 | 0.58045 | ni     | signaling protein SWIFT and related BRCT domain proteins            | um05726   | 0.48849 | K07178 | related to RIO Kinase 1                                                       |
| 12d00050 | 0.58054 | K02883 | 60S ribosomal protein L18                                           | um12258   | 0.48856 | ni     | hypothetical protein                                                          |
| 2d00035  | 0.58077 | K07466 | single-stranded DNA-binding replication protein A proteins          | um12017   | 0.48862 | ni     | conserved hypothetical protein                                                |
| 19c00146 | 0.5812  | ni     | hypothetical protein                                                | um04903   | 0.48867 | ni     | conserved hypothetical protein                                                |
| 5d00110  | 0.58126 | ni     | hypothetical protein                                                | um04896   | 0.48867 | ni     | conserved hypothetical protein                                                |
| 14d00046 | 0.58204 | K01114 | hypothetical protein                                                | um06235   | 0.48889 | K09494 | probable CCT2 - chaperonin of the TCP1 ring complex                           |
| 6d00025  | 0.5828  | ni     | hypothetical protein                                                | um06178   | 0.48928 | ni     | Mig2-1                                                                        |
| 6c00035  | 0.58286 | ni     | hypothetical protein                                                | um00964   | 0.48933 | K14537 | related to NOG2 - GTPase involved in ribosomal large subunit-nucleus export   |
| 6c00037  | 0.58287 | ni     | hypothetical protein                                                | um11900   | 0.48939 | ni     | putative protein                                                              |
| 6c00006  | 0.58292 | K01915 | glutamine synthetase                                                | um03235   | 0.4897  | ni     | conserved hypothetical protein                                                |
| 24c00008 | 0.5831  | ni     | hypothetical protein                                                | um10700   | 0.48997 | K02908 | probable RPL30 - 60S large subunit ribosomal protein L30                      |
| 10d00098 | 0.58311 | K00521 | ferric reductase                                                    | um10513   | 0.4901  | ni     | putative protein                                                              |
| 26c00065 | 0.5832  | K01752 | nucleosome remodeling factor, subunit CAF1/NURF55/MSH1              | um04223   | 0.49022 | ni     | conserved hypothetical protein                                                |
| 7d00049  | 0.58388 | K15356 | nucleotide-sugar transporter VRC4/SQV-7                             | um04383   | 0.49032 | ni     | related to ERP2 - p24 protein involved in membrane trafficking                |
| 27d00066 | 0.58475 | K02917 | 60S ribosomal protein L35A/L37                                      | um10846   | 0.49069 | ni     | related to UGA2 - succinate semialdehyde dehydrogenase                        |
| 22d00238 | 0.58515 | ni     | hypothetical protein                                                | um10064   | 0.49091 | K00844 | probable glucokinase                                                          |
| 5d00062  | 0.58518 | K07078 | hypothetical protein                                                | um03964   | 0.49099 | K12943 | related to PRP3 - essential splicing factor                                   |
| 15d00079 | 0.58572 | ni     | hypothetical protein                                                | um05158   | 0.49101 | ni     | putative protein                                                              |
| 7d00220  | 0.58585 | K03137 | transcription initiation factor IIE, beta subunit                   | um00443   | 0.49107 | K14960 | conserved hypothetical protein                                                |
| 9d00166  | 0.58585 | ni     | hypothetical protein                                                | um06229   | 0.4913  | K14856 | related to SDA1 - required for normal organization of the actin cytoskeleton  |
| 9c00341  | 0.58592 | ni     | hypothetical protein                                                | um11148   | 0.49172 | ni     | related to MTG2 - Mitochondrial GTP binding protein                           |
| 7c00312  | 0.58593 | K03231 | transcription elongation factor EF-1 alpha/Tu                       | um05203   | 0.49183 | K03869 | related to euk-4A                                                             |
| 2d00022  | 0.58555 | K01907 | acyl-coa synthetase                                                 | um03626   | 0.4918  | ni     | putative protein                                                              |
| 8d00080  | 0.58658 | ni     | hypothetical protein                                                | um00180   | 0.49213 | ni     | hypothetical protein                                                          |
| 19c00019 | 0.58677 | ni     | hypothetical protein                                                | um06256   | 0.49215 | ni     | hypothetical protein                                                          |
| 8d00060  | 0.58682 | ni     | nuclear protein export factor                                       | um02393   | 0.49222 | ni     | hypothetical protein                                                          |
| 22d00142 | 0.58696 | ni     | transporter, ABC superfamily                                        | um05656   | 0.49244 | ni     | related to SOK1 protein                                                       |
| 7c00339  | 0.58705 | K02929 | 60S ribosomal protein L44                                           | um04218   | 0.49289 | ni     | Kinesin-1 motor protein                                                       |
| 22c00094 | 0.58717 | K14561 | U3 small nucleolar ribonucleoprotein                                | um05568   | 0.49303 | ni     | probable SPT16 - general chromatin factor                                     |
| 22c00078 | 0.58733 | ni     | hypothetical protein                                                | um10425   | 0.49326 | K02911 | conserved hypothetical protein                                                |
| 9c00018  | 0.58736 | K07824 | cytochrome P450 CYP11C/CYP12/CYP24/CYP27 subfamilies                | um00283   | 0.49335 | ni     | conserved hypothetical protein                                                |
| 15c00063 | 0.58747 | ni     | hypothetical protein                                                | um10808   | 0.49372 | ni     | related to ERV2 - Flavin dependent sulphydryl oxidase                         |
| 2d00054  | 0.58769 | ni     | uncharacterized conserved protein                                   | um01463   | 0.49396 | K03237 | probable SUI2 - translation initiation factor eIF-2 alpha chain               |
| 9d00102  | 0.58828 | K01673 | predicted carbonic anhydrase involved in protection against oxidant | um10328   | 0.49419 | ni     | hypothetical protein                                                          |
| 10d00103 | 0.58836 | K10877 | DNA repair protein                                                  | um03936   | 0.49423 | K12818 | probable ATP dependent RNA helicase                                           |
| 24d00024 | 0.58844 | K11294 | nucleic acid localization sequence binding protein                  | um01866   | 0.49424 | ni     | conserved hypothetical protein                                                |
| 19d00149 | 0.58879 | ni     | hypothetical protein                                                | um01242   | 0.49485 | K13431 | related to SRP101 - signal recognition particle receptor                      |
| 11d00067 | 0.5888  | ni     | endoplasmic reticulum protein EP58                                  | um00654   | 0.49497 | K07943 | probable ARL1 - ADP-ribosylation factor                                       |
| 22d00162 | 0.58907 | ni     | uncharacterized conserved protein                                   | um11568   | 0.49521 | K01144 | related to SWH1 - Member of an oxysterol-binding protein family               |
| 7c00119  | 0.58933 | ni     | hypothetical protein                                                | um05208   | 0.49537 | K07374 | related to MLIH1 - DNA mismatch repair protein                                |
| 22c00144 | 0.58944 | ni     | predicted hydrolase                                                 | um04752   | 0.49553 | K12816 | probable CDC40 - Pre-mRNA splicing factor important for catalytic step II     |
| 2c00029  | 0.58971 | K03511 | predicted DNA damage inducible protein                              | um02757   | 0.4957  | ni     | conserved hypothetical protein                                                |
| 13d00045 | 0.58974 | ni     | hypothetical protein                                                | um05306   | 0.49579 | ni     | conserved hypothetical Ustilago-specific protein                              |
| 9d00403  | 0.58992 | ni     | hypothetical protein                                                | um10908   | 0.49601 | ni     | probable OPT1 - High-affinity glutathione transporter                         |
| 8d00084  | 0.5900  | K02213 | hypothetical protein                                                | um01162   | 0.4961  | ni     | related to large neutral amino acid transporter 1                             |
| 11c00082 | 0.59007 | K00804 | geranylgeranyl pyrophosphate synthase                               | um03134   | 0.49614 | ni     | conserved hypothetical protein                                                |
| 2c00027  | 0.59046 | K02139 | hypothetical protein                                                | um11092   | 0.49616 | K17080 | probable prohibitin PHB1                                                      |
| 6c00004  | 0.59094 | ni     | hypothetical protein                                                | um03588   | 0.49645 | ni     | related to transcription factor medusa                                        |
| 6c00044  | 0.59095 | ni     | hypothetical protein                                                | um05158   | 0.49648 | ni     | hypothetical protein                                                          |
| 13c00105 | 0.59164 | ni     | hypothetical protein                                                | um00956   | 0.49649 | ni     | related to RAX1 - Protein involved in determination of budding patterns       |
| 24d00020 | 0.59169 | ni     | nuclear localization sequence binding protein                       | um05350   | 0.49674 | ni     | hypothetical protein                                                          |
| 7d00213  | 0.59192 | ni     | oxysterol-binding protein                                           | um00394   | 0.4969  | ni     | putative protein                                                              |
| 9c00235  | 0.59198 | ni     | glucose dehydrogenase                                               | um10928   | 0.49692 | ni     | hypothetical protein                                                          |
| 15c00001 | 0.59203 | ni     | hypothetical protein                                                | um03175   | 0.49703 | ni     | putative protein                                                              |
| 8d00103  | 0.59215 | ni     | hypothetical protein                                                | um11211   | 0.49712 | ni     | conserved hypothetical protein                                                |
| 7c00141  | 0.59218 | K12864 | uncharacterized conserved protein                                   | um06420   | 0.49721 | ni     | conserved hypothetical protein                                                |
| 13d00082 | 0.59232 | ni     | hypothetical protein                                                | um11716   | 0.4973  | K02971 | probable 40S ribosomal protein s21                                            |
| 7c00129  | 0.59245 | K08286 | p21-activated serine/threonine protein kinase                       | um00212   | 0.4974  | ni     | conserved hypothetical protein                                                |
| 22c00182 | 0.5926  | ni     | hypothetical protein                                                | um11443   | 0.4974  | ni     | conserved hypothetical Ustilago-specific protein                              |
| 12c00035 | 0.59321 | ni     | hypothetical protein                                                | um02017   | 0.49769 | ni     | ni                                                                            |
| 6d00007  | 0.59352 | ni     | hypothetical protein                                                | um00927   | 0.49775 | ni     | putative protein                                                              |
| 12d00057 | 0.5936  | K14766 | nucleolar protein                                                   | um05308   | 0.49796 | ni     | hypothetical protein                                                          |
| 18c00020 | 0.59389 | ni     | FOG, RRM domain                                                     | um06117   | 0.49806 | ni     | ni                                                                            |
| 9c00395  | 0.59392 | K02606 | origin recognition complex, subunit 4                               | um00912   | 0.49806 | ni     | conserved hypothetical protein                                                |
| 6c00137  | 0.59409 | ni     | hypothetical protein                                                | um00851   | 0.49808 | ni     | related to BFR1 - Nuclear segregation protein                                 |
| 6d00010  | 0.59415 | K14845 | nuclear 5'-3' exoribonuclease-interacting protein                   | um12217   | 0.49808 | ni     | hypothetical protein                                                          |
| 24c00017 | 0.59457 | ni     | hypothetical protein                                                | um05434   | 0.49815 | K14574 | probable Shwachman-Bodian-Diamond syndrome protein                            |
| 22c00219 | 0.59499 | ni     | hypothetical protein                                                | um06260   | 0.49887 | ni     | conserved hypothetical protein                                                |
| 22d00242 | 0.59503 | ni     | membrane protein                                                    | um01772   | 0.49898 | K01785 | related to Aldose 1-epimerase precursor                                       |
| 8d00088  | 0.59515 | ni     | hypothetical protein                                                | um03778   | 0.49908 | ni     | hypothetical protein                                                          |
| 9c00061  | 0.59516 | ni     | reductases with broad range of substrate specificities              | um01633   | 0.49945 | ni     | related to Zinc finger DHHC domain containing protein 2                       |
| 24d00011 | 0.59525 | ni     | translin-associated protein X                                       | um01923   | 0.49946 | ni     | conserved hypothetical protein                                                |
| 24c00021 | 0.59571 | K09540 | molecular chaperone                                                 | um06211   | 0.49968 | K12882 | related to 80 kDa nuclear cap binding protein                                 |
| 8c00049  | 0.59582 | K00611 | ornithine carbonyltransferase OTC/ARG3                              | um00784.2 | 0.49973 | K15190 | putative protein                                                              |
| 10c00039 | 0.59604 | ni     | cell-cycle nuclear protein                                          | um12214   | 0.50012 | ni     | hypothetical protein                                                          |
| 22d00251 | 0.59613 | K09829 | sigma receptor and C-8 sterol isomerase                             | um11925   | 0.50019 | ni     | related to VPS5 - protein involved in late endosome to vacuole trafficking    |
| 16c00008 | 0.5964  | ni     | hypothetical protein                                                | um10295   | 0.50043 | ni     | related to LYS2 - L-aminooxidase-semialdehyde dehydrogenase                   |
| 27d00064 | 0.59718 | ni     | hypothetical protein                                                | um01817   | 0.50059 | ni     | conserved hypothetical protein                                                |
| 14d00050 | 0.59723 | ni     | transferrin receptor and related proteins                           | um02298   | 0.50074 | ni     | hypothetical protein                                                          |
| 27c00044 | 0.59731 | ni     | uncharacterized conserved protein                                   | um05018   | 0.50077 | ni     | related to ribosomal protein S4 precursor                                     |
| 13d00058 | 0.59737 | ni     | predicted RNA-binding protein                                       | um10396   | 0.50093 | ni     | conserved hypothetical protein                                                |
| 14c00101 | 0.59783 | ni     | glucose-6-phosphate/phosphate and phosphoenolpyruvate/phosph        | um10424.2 | 0.50096 | K02911 | related to PTM1 - member of the major facilitator superfamily                 |
| 7d00193  | 0.59893 | ni     | hypothetical protein                                                | um04501   | 0.50104 | ni     | ni                                                                            |
| 13d00002 | 0.59894 | K14810 | RNA helicase                                                        | um10903   | 0.50113 | K03037 | probable RPN7 - subunit of the regulatory particle of the proteasome          |
| 13c00069 | 0.59905 | K02332 | nucleosome DNA polymerase gamma, catalytic subunit                  | um05106   | 0.50108 | K09600 | probable serine hydroxymethyltransferase                                      |
| 22d00234 | 0.59945 | ni     | uncharacterized conserved protein                                   | um04940   | 0.50188 | ni     | hypothetical protein                                                          |
| 7c00342  | 0.59984 | ni     | ferredoxin                                                          | um04456   | 0.50241 | K04345 | protein kinase A                                                              |



|          |         |        |                                                                       |           |         |        |                                                                                             |
|----------|---------|--------|-----------------------------------------------------------------------|-----------|---------|--------|---------------------------------------------------------------------------------------------|
| 10c00011 | 0.6063  | ni     | hypothetical protein                                                  | um01608   | 0.50673 | K14775 | conserved hypothetical protein                                                              |
| 11d00021 | 0.60632 | ni     | multiple inositol polyphosphate phosphatase                           | um04541   | 0.50702 | ni     | conserved hypothetical protein                                                              |
| 7d00113  | 0.60648 | K09498 | chaperonin complex component, TCP-1 zeta subunit                      | um11418   | 0.50721 | ni     | related to VMA21 - ATPase assembly integral membrane protein                                |
| 4c00016  | 0.60651 | ni     | predicted G-protein coupled receptor                                  | um05527   | 0.50761 | ni     | putative protein                                                                            |
| 18d00088 | 0.60666 | ni     | predicted hydrolases or acyltransferases                              | um02736   | 0.5077  | ni     | conserved hypothetical protein                                                              |
| 14d00071 | 0.60676 | K06636 | structural maintenance of chromosome protein 1                        | um01645   | 0.50793 | K12199 | conserved hypothetical protein                                                              |
| 5c00160  | 0.60718 | ni     | uncharacterized conserved protein                                     | um03895   | 0.50794 | K14570 | related to exonuclease GOR                                                                  |
| 8c00015  | 0.60738 | ni     | hypothetical protein                                                  | um00702   | 0.50826 | ni     | putative protein                                                                            |
| 7c00157  | 0.60764 | K08869 | predicted unusual protein kinase                                      | um04950   | 0.50841 | K15562 | related to cyclin dependent kinase C                                                        |
| 14c00086 | 0.60769 | ni     | hypothetical protein                                                  | um01862   | 0.50872 | K03325 | related to arsenite transporter ARR3                                                        |
| 9d00284  | 0.6077  | ni     | hypothetical protein                                                  | um11551   | 0.50881 | K02966 | probable RPS19B - ribosomal protein S19                                                     |
| 18d00065 | 0.6079  | ni     | hypothetical protein                                                  | 0.50953   | ni      |        | hypothetical protein                                                                        |
| 8c00028  | 0.60797 | ni     | hypothetical protein                                                  | um06233   | 0.50958 | K14564 | probable SIK1 - involved in pre-rRNA processing                                             |
| 9c00316  | 0.60817 | ni     | predicted GTP-binding protein MMR1                                    | um00432   | 0.50963 | K01259 | probable proline iminopeptidase                                                             |
| 18c00317 | 0.60875 | K02876 | mitochondrial/chloroplast ribosomal protein L15/L10                   | um01530   | 0.50965 | K01889 | probable FRS2 - phenylalanine-tRNA ligase beta chain                                        |
| 19d00097 | 0.6093  | K08286 | checkpoint kinase                                                     | um10175   | 0.51003 | ni     | probable sphingosine-1-phosphate lyase                                                      |
| 6c00001  | 0.60959 | ni     | hypothetical protein                                                  | um00982   | 0.51023 | K08018 | related to PPM1 - vacuolar endopolyphosphatase                                              |
| 14d00041 | 0.6097  | K15458 | SAP family cell cycle dependent phosphatase-associated protein        | um00652   | 0.51049 | ni     | related to RNA helicase                                                                     |
| 12d00111 | 0.60975 | K15427 | serine/threonine specific protein phosphatase                         | um11871   | 0.51059 | K03360 | related to GRR1 - required for glucose repression and for glucose and cation transport      |
| 16c00060 | 0.60977 | ni     | hypothetical protein                                                  | um11652   | 0.51128 | K10733 | related to PSF2 - part of GINS                                                              |
| 9c00413  | 0.60982 | ni     | hypothetical protein                                                  | um10374   | 0.51145 | ni     | related to TIM11 - subunit E of the dimeric form of mitochondrial F1F0-ATPase               |
| 3c00054  | 0.60993 | ni     | hypothetical protein                                                  | um03855   | 0.51158 | ni     | conserved hypothetical protein                                                              |
| 15c00021 | 0.61035 | ni     | hypothetical protein                                                  | um03862   | 0.51174 | K12182 | related to VPS27 - vacuolar protein sorting-associated protein                              |
| 22c00198 | 0.61052 | K09584 | thioredoxin/protein disulfide isomerase                               | um10739   | 0.51183 | ni     | hypothetical protein                                                                        |
| 7d00064  | 0.61109 | K14004 | vesicle coat complex COPII, subunit SEC13                             | um10438   | 0.51215 | ni     | conserved hypothetical protein                                                              |
| 3c00028  | 0.61134 | K15562 | hypothetical protein kinase                                           | um03929   | 0.51216 | ni     | related to Signal peptide peptidase                                                         |
| 9d00046  | 0.61273 | K14709 | Fez2/Zn2+ regulated transporter                                       | um04167   | 0.51219 | K02149 | probable vacuolar ATP synthase subunit D                                                    |
| 13c00106 | 0.61276 | K07975 | ras-related small GTPase                                              | um00857   | 0.51242 | ni     | probable KRE6 - glucan synthase subunit                                                     |
| 9c00300  | 0.61287 | ni     | hypothetical protein                                                  | um12260   | 0.51244 | ni     | putative protein                                                                            |
| 9c00068  | 0.61343 | ni     | hypothetical protein                                                  | um06058   | 0.51253 | ni     | conserved hypothetical protein                                                              |
| 28c00064 | 0.61346 | ni     | Cot2-related actin-bundling protein                                   | 0.51261   | ni      |        | related to ARL1 - ADP-ribosylation factor                                                   |
| 27c00009 | 0.61368 | ni     | hypothetical protein                                                  | um02910   | 0.51272 | ni     | conserved hypothetical protein                                                              |
| 7d00268  | 0.61395 | K03754 | translation initiation factor ZB, beta subunit                        | um10171   | 0.51279 | ni     | conserved hypothetical protein                                                              |
| 9c00041  | 0.61446 | ni     | permease of the major facilitator superfamily                         | um00909   | 0.51291 | ni     | conserved hypothetical protein                                                              |
| 26c00062 | 0.6156  | ni     | hypothetical protein                                                  | um00259   | 0.51314 | ni     | conserved hypothetical protein                                                              |
| 7c00156  | 0.61569 | ni     | hypothetical protein                                                  | um10220   | 0.51357 | ni     | conserved hypothetical protein                                                              |
| 22c00052 | 0.61579 | ni     | diamine acetyltransferase                                             | um04390   | 0.51363 | ni     | conserved hypothetical protein                                                              |
| 6c00046  | 0.61601 | ni     | hypothetical protein                                                  | um04100   | 0.51377 | ni     | hypothetical protein                                                                        |
| 24d00023 | 0.61602 | ni     | D-3-phosphoglycerate dehydrogenase                                    | um01638   | 0.51404 | ni     | related to Epoxide hydrolase 1                                                              |
| 19c00052 | 0.61638 | ni     | hypothetical protein                                                  | um10805   | 0.51412 | K11099 | probable SMM2 - serRNP G protein                                                            |
| 9d00319  | 0.61645 | K02953 | 40S ribosomal protein S13                                             | um12062   | 0.51506 | K10949 | probable ERD2 - ER lumen protein-retaining receptor                                         |
| 9c00117  | 0.61665 | K15441 | hypothetical protein                                                  | um10270   | 0.51511 | ni     | related to aspartate-tRNA ligase                                                            |
| 12d00129 | 0.61721 | ni     | hypothetical protein                                                  | um01197   | 0.51526 | K00652 | related to 8-amino-7-oxononanoate synthase                                                  |
| 22c00081 | 0.61754 | K01735 | hypothetical AROM protein                                             | um11420   | 0.51565 | ni     | conserved hypothetical protein                                                              |
| 10c0040  | 0.61791 | ni     | hypothetical protein                                                  | um03652   | 0.51556 | ni     | conserved hypothetical protein                                                              |
| 27c00003 | 0.61824 | ni     | hypothetical protein                                                  | um01803   | 0.51556 | ni     | related to NCA2 - control of mitochondrial synthesis of Atp6p and Atp6b                     |
| 12c00122 | 0.61857 | ni     | hypothetical protein                                                  | um11701   | 0.51564 | ni     | related to NUP57 - nuclear pore protein                                                     |
| 22c00005 | 0.61881 | ni     | hypothetical protein                                                  | um01180   | 0.51572 | K03097 | probable protein kinase CK2 alpha subunit                                                   |
| 9c00056  | 0.61883 | ni     | hypothetical protein                                                  | um01479   | 0.51574 | ni     | putative protein                                                                            |
| 9c00369  | 0.6193  | ni     | hypothetical protein                                                  | um05557   | 0.51575 | K11756 | related to RSC2 - member of RSC complex                                                     |
| 9c00090  | 0.61946 | K14846 | ribosome biogenesis protein RPF1                                      | um04905   | 0.51578 | ni     | conserved hypothetical protein                                                              |
| 12c00087 | 0.6195  | ni     | hypothetical protein                                                  | um03943   | 0.5158  | ni     | putative protein                                                                            |
| 5c00091  | 0.61984 | ni     | hypothetical protein                                                  | 0.51586   | ni      |        | conserved hypothetical Ustilago-specific protein                                            |
| 6d00128  | 0.62009 | ni     | hypothetical protein                                                  | um10448   | 0.51604 | K12393 | probable clathrin assembly protein AP47                                                     |
| 9d00075  | 0.62026 | K11563 | hypothetical protein                                                  | um11075   | 0.51622 | ni     | hypothetical protein                                                                        |
| 9c00060  | 0.62055 | ni     | hypothetical protein                                                  | um10609   | 0.5164  | K15100 | probable CTP1 - Mitochondrial citrate transporter - member of the mitochondrial carrier     |
| 20d00003 | 0.62074 | ni     | hypothetical protein                                                  | um10735   | 0.51641 | K00166 | probable 2-oxoisovalerate dehydrogenase alpha subunit                                       |
| 19c00339 | 0.62091 | ni     | hypothetical protein                                                  | 0.51645   | ni      |        | related to MRPS - DNA-directed RNA polymerase I                                             |
| 19d00037 | 0.62094 | ni     | hypothetical protein                                                  | um10147   | 0.517   | ni     | hypothetical protein                                                                        |
| 7d00269  | 0.621   | ni     | hypothetical protein                                                  | um06032   | 0.51702 | ni     | conserved hypothetical protein                                                              |
| 2d00067  | 0.62114 | ni     | muskelin                                                              | um11104   | 0.5171  | K00362 | putative nitrite reductase                                                                  |
| 18d00053 | 0.62118 | K15745 | RNA 5'-phosphatase                                                    | 0.51717   | ni      |        | related to MRPL10 - mitochondrial ribosomal protein                                         |
| 2d00033  | 0.62125 | K06634 | cdk activating kinase                                                 | um12117   | 0.51716 | ni     | putative protein                                                                            |
| 7d00033  | 0.62171 | ni     | putative phosphoinositide phosphatase                                 | um01763   | 0.51786 | ni     | putative protein                                                                            |
| 6d00072  | 0.62185 | ni     | arylacetylamine deacetylase                                           | um10793   | 0.51798 | K12881 | conserved hypothetical protein                                                              |
| 8d00093  | 0.62207 | K14535 | predicted nucleoside kinase/nuclear protein                           | um02852   | 0.51809 | ni     | conserved hypothetical Ustilago-specific protein                                            |
| 22d00001 | 0.62229 | K01181 | hypothetical protein                                                  | 0.52229   | ni      |        | conserved hypothetical Ustilago-specific protein                                            |
| 9d00135  | 0.6227  | ni     | putative lipase essential for disintegration of autophagic bodies in  | um06425   | 0.51845 | ni     | conserved hypothetical protein                                                              |
| 7d00231  | 0.62274 | ni     | hypothetical protein                                                  | um11601   | 0.51882 | ni     | conserved hypothetical protein                                                              |
| 9c00151  | 0.62274 | ni     | FOG, Zn-finger                                                        | um05624   | 0.51953 | ni     | hypothetical protein                                                                        |
| 5d00114  | 0.62337 | ni     | Cot2-related actin-bundling protein                                   | um03933   | 0.51966 | K01942 | related to BPL1 - biotin holocarboxylase synthetase                                         |
| 3c00044  | 0.62373 | K15084 | mitochondrial solute carrier protein                                  | um05405   | 0.51981 | K17260 | probable actin-like protein ACT2                                                            |
| 10c00019 | 0.62384 | ni     | hypothetical protein                                                  | um10040.2 | 0.51987 | ni     | conserved hypothetical protein                                                              |
| 22d00004 | 0.62452 | ni     | hypothetical protein                                                  | um06180   | 0.52009 | ni     | Mig2-4                                                                                      |
| 7d00339  | 0.62481 | K04798 | prefoldin subunit 6                                                   | um05708   | 0.52014 | ni     | conserved hypothetical protein                                                              |
| 6c00015  | 0.62509 | ni     | hypothetical protein                                                  | um12247   | 0.52021 | ni     | conserved hypothetical protein                                                              |
| 27d00008 | 0.62515 | ni     | sensory transduction histidine kinase                                 | um01778   | 0.52037 | ni     | putative protein                                                                            |
| 9d00057  | 0.62517 | K07243 | hypothetical protein                                                  | um01886   | 0.52056 | K13289 | related to carboxypeptidase                                                                 |
| 10c00052 | 0.62607 | K02220 | cyclin B and related kinase-activating proteins                       | um10629.2 | 0.52062 | ni     | conserved hypothetical protein                                                              |
| 5d00011  | 0.62614 | ni     | putative phosphate transporter                                        | um04721   | 0.52151 | K09650 | conserved hypothetical protein                                                              |
| 16d00021 | 0.62634 | K03341 | RNA polymerase II transcription initiation/nucleotide excision repara | um11165   | 0.52159 | ni     | conserved hypothetical protein                                                              |
| 22c00127 | 0.62691 | ni     | hypothetical protein                                                  | um04487.2 | 0.52163 | ni     | conserved hypothetical protein                                                              |
| 7c00011  | 0.62693 | ni     | hypothetical protein                                                  | um05737   | 0.52168 | ni     | conserved hypothetical protein                                                              |
| 27d00051 | 0.62717 | K12840 | hypothetical protein                                                  | um02600   | 0.52196 | K01412 | probable mitochondrial processing peptidase alpha chain precursor                           |
| 18c00002 | 0.62721 | K03253 | translation initiation factor 3, subunit b                            | 0.52213   | ni      |        | related to transcription elongation factor TFIIS                                            |
| 22d00092 | 0.62777 | ni     | hypothetical protein                                                  | um05589   | 0.52274 | ni     | hypothetical protein                                                                        |
| 14d00069 | 0.62809 | ni     | tomosyn and related SNARE-interacting proteins                        | um02881   | 0.5229  | K14407 | related to Cleavage stimulation factor                                                      |
| 22c00025 | 0.62813 | K13124 | conserved WD40 repeat-containing protein                              | um11553   | 0.52297 | K06679 | related to spindle assembly checkpoint protein                                              |
| 27c00010 | 0.62825 | K03433 | hypothetical protein                                                  | um04129   | 0.52325 | ni     | related to proliferation associated SNF2-like protein                                       |
| 27d00087 | 0.62866 | K03019 | RNA polymerase III subunit C11                                        | um11141   | 0.52349 | K00861 | related to FMN1 - Riboflavin kinase                                                         |
| 19d00104 | 0.62972 | ni     | hypothetical protein                                                  | um01514   | 0.52376 | K04368 | dual specificity protein kinase Fuz7                                                        |
| 15c00026 | 0.62998 | ni     | hypothetical protein                                                  | um10272   | 0.5239  | ni     | putative protein                                                                            |
| 16d0049  | 0.63053 | ni     | multicopper oxidases                                                  | um12092   | 0.52416 | ni     | hypothetical protein                                                                        |
| 6d00091  | 0.63128 | ni     | hypothetical protein                                                  | um11269   | 0.52453 | K02929 | probable RPL42B - ribosomal protein L36a                                                    |
| 7c00124  | 0.63154 | K01613 | RNA helicase nonsense mRNA reducing factor                            | um05417   | 0.52467 | K03361 | related to F-box                                                                            |
| 5c00165  | 0.63182 | ni     | hypothetical protein                                                  | um12129.2 | 0.5247  | K17292 | related to Tubulin-specific chaperone A                                                     |
| 9d00133  | 0.632   | ni     | hypothetical protein                                                  | um11316   | 0.5248  | ni     | conserved hypothetical protein                                                              |
| 19c00133 | 0.63233 | ni     | hypothetical protein                                                  | um12233   | 0.52487 | ni     | conserved hypothetical protein                                                              |
| 9c00314  | 0.63255 | K11675 | hypothetical protein                                                  | um01690   | 0.52541 | ni     | hypothetical protein                                                                        |
| 6d00039  | 0.63294 | ni     | hypothetical protein                                                  | um02116   | 0.52565 | ni     | hypothetical protein                                                                        |
| 15d00033 | 0.63301 | ni     | hypothetical protein                                                  | um04749   | 0.52578 | ni     | conserved hypothetical protein                                                              |
| 14d00090 | 0.63351 | K00820 | glucosamine 6-phosphate synthetases                                   | um04324   | 0.5258  | K00232 | probable PDX1 - acyl-CoA oxidase                                                            |
| 9c00043  | 0.63369 | ni     | hypothetical protein                                                  | um10708   | 0.52602 | K01653 | related to LVL - acetylacolate synthase                                                     |
| 5c00114  | 0.63398 | K02153 | hypothetical protein                                                  | um02387   | 0.52625 | ni     | related to oligopeptide transporter                                                         |
| 3c00030  | 0.63399 | ni     | glucose dehydrogenase                                                 | um10667   | 0.52636 | ni     | related to SPN1 - Spi6-interacting putative elongation factor                               |
| 7d00287  | 0.63422 | ni     | transcription-coupled repair protein CSB/RAD26                        | um11647   | 0.52646 | ni     | hypothetical protein                                                                        |
| 18d00072 | 0.63436 | K02734 | ZDS proteasome regulatory subunit beta type PSMB2/PRE1                | um05651   | 0.52672 | K14788 | conserved hypothetical protein                                                              |
| 15d00018 | 0.63504 | ni     | phospholipase A2-activating protein                                   | um04748   | 0.52683 | ni     | putative protein                                                                            |
| 15c00011 | 0.63558 | ni     | hypothetical protein                                                  | um01733   | 0.52684 | ni     | related to short chain dehydrogenase                                                        |
| 11c00064 | 0.63583 | ni     | hypothetical protein                                                  | um02421   | 0.52687 | K13339 | related to PEX6 - peroxisomal assembly protein                                              |
| 9c00192  | 0.63588 | K16261 | amino acid transporters                                               | um11801   | 0.52701 | K02914 | related to S0S ribosomal protein L34                                                        |
| 24d00056 | 0.63595 | ni     | uncharacterized conserved protein                                     | um10192   | 0.52709 | ni     | conserved hypothetical protein                                                              |
| 19d00016 | 0.63601 | ni     | hypothetical protein                                                  | um10418   | 0.52714 | ni     | related to MRPS28 - mitochondrial ribosomal protein                                         |
| 24d00034 | 0.6361  | ni     | hypothetical protein                                                  | um05709   | 0.5274  | ni     | probable GPI8 - GPI-anchor transamidase                                                     |
| 8d00079  | 0.63623 | ni     | hypothetical protein                                                  | um11745   | 0.52762 | K02332 | related to MIP1 - DNA-directed DNA polymerase gamma catalytic subunit                       |
| 19c00057 | 0.63629 | ni     | hypothetical protein                                                  | 0.528     | ni      |        | related to IADH1 dehydrogenase                                                              |
| 14d00008 | 0.63642 | ni     | hypothetical protein                                                  | um03147   | 0.52814 | K12396 | related to Adapter-related protein complex 3 delta 1 subunit                                |
| 10d00095 | 0.63649 | ni     | FOG, Zn-finger                                                        | um00187   | 0.52819 | ni     | hypothetical protein                                                                        |
| 14d00073 | 0.63672 | ni     | hypothetical protein                                                  | um11439   | 0.5282  | K12493 | related to GLO3 - zinc finger protein                                                       |
| 9d00299  | 0.6372  | ni     | conserved phosphodiester-like protein                                 | um10168   | 0.52835 | ni     | conserved hypothetical protein                                                              |
| 9c00056  | 0.63732 | ni     | hypothetical protein                                                  | um10063   | 0.52861 | K15430 | related to TRM11 - Catalytic subunit of an adoMet-nucleotide tRNA methyltransferase complex |
| 22d00268 | 0.63754 | ni     | hypothetical protein                                                  | um03998   | 0.52872 | K10846 | related to RAD2 - structure-specific nuclease of the nucleotide excision repairosome        |
| 18d00050 | 0.63764 | K14416 | elongation factor 1 alpha                                             | um02094   | 0.52884 | ni     | putative protein                                                                            |
| 22c00235 | 0.63766 | ni     | hypothetical protein                                                  | um02751   | 0.5289  | ni     | hypothetical protein                                                                        |
| 15d00077 | 0.63783 | ni     | hypothetical protein                                                  | um10776   | 0.52901 | K03680 | related to GC02 - translation initiation factor eIF2B                                       |
| 5d00085  | 0.63796 | K11838 | ubiquitin carboxyl-terminal hydrolase                                 | um02107   | 0.52905 | ni     | conserved hypothetical protein                                                              |
| 19d00164 | 0.63818 | ni     | predicted Zn-dependent hydrolase                                      | um00169   | 0.52933 | ni     | related to AUT1 - essential for autophagocytosis                                            |
| 15c00022 | 0.63848 | ni     | synaptic vesicle transporter SV2                                      | um10929   | 0.52946 | K08501 | conserved hypothetical protein                                                              |
| 16d0030  | 0.63887 | ni     | hypothetical protein                                                  | um10970   | 0.52989 | ni     | related to Sno-type pyridoxime vitamin B6 biosynthetic protein SNO1                         |
| 22c00089 | 0.63973 | ni     | hypothetical protein                                                  | um02853   | 0.53026 | ni     | related to MRPS5 - mitochondrial ribosomal protein                                          |
| 10c00089 | 0.64025 | ni     | hypothetical protein                                                  | um05331   | 0.53063 | ni     | conserved hypothetical protein                                                              |
| 12d00055 | 0.64041 | ni     | proteins containing the FAD binding domain                            | um10171   | 0.53064 | ni     | hypothetical protein                                                                        |
| 10c00074 | 0.64044 | K04706 | Zn-finger transcription factor                                        | um00224   | 0.53101 | K07734 | conserved hypothetical protein                                                              |
| 5d00104  | 0.64095 | K02975 | methylenetetrahydrofolate dehydrogenase                               | um05356   | 0.53122 | ni     | hypothetical protein                                                                        |
| 12d00126 | 0.64099 | ni     | hypothetical protein                                                  | um03171.2 | 0.53127 | K03299 | related to GCN3 - translation initiation factor eIF2B                                       |
| 7d00124  | 0.6413  | ni     | hypothetical protein                                                  | um02697   | 0.53134 | K03106 | probable SRP54 - signal recognition particle subunit                                        |
| 13c00066 | 0.6414  | K02260 | hypoth                                                                |           |         |        |                                                                                             |

|           |         |        |                                                                        |           |         |        |                                                                                                               |
|-----------|---------|--------|------------------------------------------------------------------------|-----------|---------|--------|---------------------------------------------------------------------------------------------------------------|
| 7c00352   | 0.65121 | ni     | hypothetical protein                                                   | um01897   | 0.53502 | ni     | conserved hypothetical protein                                                                                |
| 9c00301   | 0.65204 | K11429 | histone tail methylase                                                 | um00923   | 0.53509 | K04523 | related to DSK2 - ubiquitin-like protein                                                                      |
| 9c00321   | 0.65277 | ni     | hypothetical protein                                                   | um05467   | 0.53519 | ni     | conserved hypothetical protein                                                                                |
| 8a00039   | 0.65339 | ni     | hypothetical protein                                                   | um05332   | 0.53532 | 128    | conserved hypothetical protein                                                                                |
| 5c00067   | 0.65319 | K11422 | histone H3 (Lys4) methyltransferase complex, subunit SET1              | um02604   | 0.53533 | ni     | hypothetical protein                                                                                          |
| 15c00091  | 0.65319 | K05863 | mitochondrial ADP/ATP carrier proteins                                 | um11690   | 0.53606 | ni     | conserved hypothetical protein                                                                                |
| 16a00049  | 0.65322 | ni     | hypothetical protein                                                   | um04576   | 0.53628 | ni     | conserved hypothetical protein                                                                                |
| 19a00038  | 0.65329 | ni     | hypothetical protein                                                   | 0.53633   | K02081  |        | related to CD31 - CDP-diacylglycerol synthase                                                                 |
| 26c00049  | 0.65464 | ni     | hypothetical protein                                                   | um00367   | 0.53661 | K07555 | related to ATP11 - F1F0-ATPase complex assembly protein                                                       |
| 8c01026   | 0.65472 | ni     | hypothetical protein                                                   | um04380   | 0.53721 | ni     | related to ATG9 - integral membrane protein required for Cvt and autophagy transport                          |
| 12c00071  | 0.65504 | ni     | hypothetical protein                                                   | um10511   | 0.53757 | K03013 | conserved hypothetical protein                                                                                |
| 14c00135  | 0.65561 | ni     | hypothetical protein                                                   | um06435   | 0.53776 | ni     | conserved hypothetical protein                                                                                |
| 12a00107  | 0.65565 | ni     | hypothetical protein                                                   | um03344   | 0.53788 | ni     | conserved hypothetical protein                                                                                |
| 22c00131  | 0.65669 | ni     | hypothetical protein                                                   | um06179   | 0.53808 | ni     | Mig2-2                                                                                                        |
| 19a00106  | 0.65688 | ni     | hypothetical protein                                                   | um04656.2 | 0.53817 | ni     | related to Rho-GTPase-activating protein 1                                                                    |
| 7a00036   | 0.65746 | K12160 | ubiquitin-like proteins                                                | um11991   | 0.53828 | ni     | conserved hypothetical protein                                                                                |
| 12c00109  | 0.65782 | K05545 | RNA-dihydrourate synthase                                              | um00779   | 0.53865 | ni     | related to mitochondrial ribosomal protein Yml8                                                               |
| 4a00009   | 0.65793 | ni     | hypothetical protein                                                   | um01201.2 | 0.53884 | ni     | conserved hypothetical protein                                                                                |
| 7a00034   | 0.65821 | ni     | hypothetical protein                                                   | um11756   | 0.53978 | ni     | hypothetical protein                                                                                          |
| 3a00097   | 0.65926 | K12194 | protein involved in glucose depression and pre-vacuolar endocytosis    | um00895   | 0.53981 | K15440 | related to tRNA-specific adenosine deaminase 1                                                                |
| 12a00124  | 0.66025 | ni     | hypothetical protein                                                   | um00609   | 0.53991 | ni     | conserved hypothetical protein                                                                                |
| 9a00290   | 0.66062 | ni     | F-box protein containing LRR                                           | um03434   | 0.53999 | K10754 | related to replication factor C protein                                                                       |
| 19a00100  | 0.66068 | ni     | hypothetical protein                                                   | um04951   | 0.54008 | K12819 | related to step II splicing factor SLU7                                                                       |
| 22a00097  | 0.66116 | ni     | vesicle coat complex COPII, subunit SEC23                              | um03062   | 0.5406  | K14559 | related to MPP10 - component of the U3 small nuclear ribonucleoprotein                                        |
| 22c00044  | 0.66175 | K11718 | UDP-glucose, glycoprotein glucosyltransferase                          | um03207   | 0.54061 | K13348 | related to glomerulosclerosis protein Mpv17                                                                   |
| 9c00043   | 0.66177 | K16315 | RNA-5'-phosphatase                                                     | um11884.2 | 0.54091 | K03539 | related to Mitochondrial Dnal chaperone                                                                       |
| 14a00057  | 0.66216 | ni     | kelch repeat-containing proteins                                       | um06226   | 0.54133 | ni     | conserved hypothetical protein                                                                                |
| 19a00115  | 0.66283 | K11849 | ubiquitin carboxyl-terminal hydrolase                                  | um04505   | 0.5414  | ni     | related to glutamyl-tRNA                                                                                      |
| 22a00275  | 0.66362 | ni     | acid sphingomyelinase and PHM5 phosphate metabolism protein            | um01544   | 0.54165 | K11230 | related to SSK2 - MAP kinase kinase of the high osmolarity signal transduction pathway                        |
| 7c00015   | 0.66476 | ni     | hypothetical protein                                                   | um04187   | 0.54171 | ni     | conserved hypothetical protein                                                                                |
| 13a00022  | 0.66493 | ni     | hypothetical protein                                                   | um01481   | 0.542   | ni     | hypothetical protein                                                                                          |
| 19c00118  | 0.66667 | ni     | hypothetical protein                                                   | um01392   | 0.54227 | ni     | conserved hypothetical Ustilago-specific protein                                                              |
| 12a00083  | 0.66733 | ni     | hypothetical protein                                                   | um00615   | 0.54261 | K14566 | conserved hypothetical protein                                                                                |
| 8c00089   | 0.66746 | ni     | transcription factor                                                   | um04785   | 0.54282 | K10903 | related to protein hus1                                                                                       |
| 5c00038   | 0.66762 | ni     | pleiotropic drug resistance proteins                                   | um11262   | 0.54283 | K04798 | related to YKE2 - Gm complex component                                                                        |
| 9c00178   | 0.66795 | K14815 | protein involved in mRNA turnover                                      | um01313   | 0.54381 | ni     | conserved hypothetical protein                                                                                |
| 9c00137   | 0.66832 | K14328 | nonsense-mediated decay protein Upf3                                   | um02700   | 0.54383 | ni     | conserved hypothetical protein                                                                                |
| 27c00049  | 0.66908 | K02977 | ubiquitin40s ribosomal protein S27a fusion                             | um04698   | 0.544   | ni     | conserved hypothetical protein                                                                                |
| 26a0053   | 0.66917 | ni     | hypothetical protein                                                   | um00694.2 | 0.54406 | K00249 | related to Acyl-CoA dehydrogenase                                                                             |
| 19c00337  | 0.66934 | ni     | hypothetical protein                                                   | um03434   | 0.54434 | ni     | hypothetical protein                                                                                          |
| 12a00101  | 0.67054 | K10575 | ubiquitin-protein ligase                                               | um03306   | 0.54461 | K00948 | probable PR54 - ribose-phosphate pyrophosphokinase 3                                                          |
| 3c00058   | 0.67115 | ni     | S-M checkpoint control protein CID1 and related nucleotidyltransferase | um00987   | 0.54462 | ni     | related to YND1 - apyrase                                                                                     |
| 16a00003  | 0.67208 | ni     | hypothetical protein                                                   | um10384   | 0.54498 | ni     | related to TATA-binding protein-associated phosphoprotein Dr1 protein                                         |
| 12c00058  | 0.67243 | ni     | uncharacterized conserved protein                                      | um02222   | 0.54503 | ni     | hypothetical protein                                                                                          |
| 19a00096  | 0.67259 | K14171 | alkyl hydroperoxide reductase                                          | um10377   | 0.54511 | ni     | conserved hypothetical protein                                                                                |
| 14a00075  | 0.67287 | ni     | hypothetical protein                                                   | um00871   | 0.54519 | K14679 | related to TRL1 - tRNA ligase                                                                                 |
| 8c00072   | 0.67379 | ni     | rab6 GTPase activator GAPCenA and related TBC domain protein           | um10042   | 0.54545 | ni     | related to wdr-repeat protein 8                                                                               |
| 12c00080  | 0.67429 | ni     | hypothetical protein                                                   | um10169   | 0.54545 | ni     | probable potassium channel beta subunit protein                                                               |
| 5a00040   | 0.67494 | K11254 | histone H4                                                             | um05511   | 0.54549 | K07897 | probable GTPase Rab7 protein                                                                                  |
| 19a00004  | 0.67562 | ni     | predicted transporter                                                  | um10709   | 0.5456  | ni     | conserved hypothetical protein                                                                                |
| 12a00068  | 0.67666 | ni     | hypothetical protein                                                   | um10495   | 0.54569 | ni     | putative protein                                                                                              |
| 15a00091  | 0.67745 | ni     | hypothetical protein                                                   | um05722   | 0.54587 | K14569 | probable BMS1 - GTP-binding protein                                                                           |
| 22c00172  | 0.67749 | ni     | ubiquitin-resistance-associated protein                                | um11885   | 0.54603 | ni     | related to TPN2                                                                                               |
| 3a00021   | 0.67852 | K01381 | aspartyl protease                                                      | um03071   | 0.5463  | K05605 | related to enoyl-CoA-hydrolase                                                                                |
| 7c00076   | 0.67959 | K00981 | CDP-diacylglycerol synthase                                            | um01234   | 0.54682 | ni     | putative protein                                                                                              |
| 25c00073  | 0.68018 | ni     | transcription factor                                                   | um12237   | 0.54692 | ni     | hypothetical protein                                                                                          |
| 22a00298  | 0.68033 | ni     | hypothetical protein                                                   | um10620   | 0.54714 | K03946 | probable nadh-ubiquinone oxidoreductase 10                                                                    |
| 9a00373   | 0.68092 | ni     | hypothetical protein                                                   | um0592    | 0.54749 | K01262 | probable aminopeptidase P                                                                                     |
| 20a00060  | 0.6815  | K00765 | ATP phosphoribosyltransferase                                          | um05720   | 0.54783 | K15731 | related to PSR1 - plasma membrane phosphatase required for sodium stress response                             |
| 14a00101  | 0.68157 | K10848 | structure-specific endonuclease ERCC1-XPF, catalytic component         | um01120   | 0.54785 | K00995 | related to PGS1 - phosphatidylglycerophosphate synthase                                                       |
| 9a00175   | 0.68289 | K10761 | uncharacterized conserved protein                                      | um10275   | 0.54786 | ni     | conserved hypothetical protein                                                                                |
| 14a00053  | 0.68331 | K14737 | cell cycle control protein                                             | um04071   | 0.548   | ni     | conserved hypothetical protein                                                                                |
| 13a00055  | 0.68395 | K06980 | transcription factor, component of CCR4 transcriptional complex        | um00651   | 0.54828 | K03355 | related to CDC23 - cell division control protein                                                              |
| 27a00006  | 0.68448 | ni     | alpha-d-galactosidase                                                  | um00638   | 0.54864 | ni     | related to CDA2 - sporulation-specific chitin deacetylase                                                     |
| 16a00026  | 0.68448 | ni     | exocyst complex, subunit SEC15                                         | um03819   | 0.54923 | ni     | conserved hypothetical protein                                                                                |
| 7a00038   | 0.6849  | ni     | hypothetical protein                                                   | um11134   | 0.54932 | ni     | related to Ylpeepe protein                                                                                    |
| 16a00122  | 0.6849  | ni     | hypothetical protein                                                   | um04704   | 0.54959 | K10865 | related to MRB74 - DNA repair and meiotic recombination protein                                               |
| 5a00046   | 0.68629 | ni     | permease of the major facilitator superfamily                          | um01700   | 0.54961 | ni     | related to ABC transporter protein                                                                            |
| 2c00013   | 0.68636 | ni     | zinc carboxypeptidase                                                  | um03121   | 0.54965 | ni     | related to beta-1                                                                                             |
| 6a00130   | 0.68716 | K01874 | methylornithine synthetase                                             | um01756.2 | 0.54983 | K06901 | probable Purine Transporter AzgA                                                                              |
| 22c00050  | 0.68721 | K11806 | scf-like E3 ubiquitin processing protein                               | um05122   | 0.54987 | K01062 | related to platelet-activating factor acetylhydrolase precursor                                               |
| 9c00029   | 0.68733 | ni     | hypothetical protein                                                   | um00931   | 0.55012 | ni     | ni                                                                                                            |
| 6c00019   | 0.68836 | ni     | WD40 repeat stress protein                                             | um15015   | 0.55049 | K08825 | related to putative dual specificity protein kinase pom1                                                      |
| 22a00051  | 0.6888  | ni     | hypothetical protein                                                   | um10431   | 0.55081 | ni     | conserved hypothetical protein                                                                                |
| 6a00101   | 0.68919 | K11407 | histone deacetylase complex, catalytic component HDA1                  | um01079   | 0.5509  | ni     | conserved hypothetical protein                                                                                |
| 16c00100  | 0.6891  | ni     | hypothetical protein                                                   | um03371   | 0.55117 | K00851 | related to thermoresistant glucokinase                                                                        |
| 7c00043   | 0.69158 | ni     | hypothetical protein                                                   | um03876.2 | 0.55119 | K05012 | related to chloride channel protein                                                                           |
| 22c00145  | 0.69256 | ni     | hypothetical protein                                                   | um00808   | 0.55198 | K15198 | conserved hypothetical protein                                                                                |
| 7a00016   | 0.69287 | ni     | hypothetical protein                                                   | um15993   | 0.55243 | ni     | related to Serine                                                                                             |
| 19a00155  | 0.69292 | K09885 | serine/threonine protein kinase                                        | um02762   | 0.55306 | ni     | related to Enoyl-CoA hydratase                                                                                |
| 12c00032  | 0.69334 | K07936 | GTPase Rat7C4/GSP1                                                     | um05955   | 0.55353 | ni     | probable VTC1 - protein controls Sec18p                                                                       |
| 4a00019   | 0.694   | ni     | hypothetical protein                                                   | um10383   | 0.55384 | ni     | related to KIP1 - kinesin-related protein                                                                     |
| 22c00150  | 0.69413 | ni     | hypothetical protein                                                   | um00701.2 | 0.55413 | ni     | hypothetical protein                                                                                          |
| 22c00071  | 0.69443 | ni     | hypothetical protein                                                   | um03346   | 0.55428 | ni     | hypothetical protein                                                                                          |
| 7a00091   | 0.69452 | ni     | hypothetical protein                                                   | um10131   | 0.55433 | K07942 | probable ARL1 - ADP-ribosylation factor                                                                       |
| 9c00246   | 0.69462 | ni     | hypothetical protein                                                   | um10853   | 0.55437 | ni     | putative protein                                                                                              |
| 7c00264   | 0.6953  | K02324 | DNA polymerase epsilon, catalytic subunit A                            | um10722   | 0.55466 | ni     | related to GYP1 - GTPase activating protein                                                                   |
| 7a00211   | 0.69674 | K01693 | imidazoleglycerol-phosphate dehydratase                                | um11924   | 0.55474 | ni     | conserved hypothetical protein                                                                                |
| 9c00293   | 0.69677 | ni     | hypothetical protein                                                   | um01270   | 0.55512 | K01262 | probable aminopeptidase P                                                                                     |
| 10a00112  | 0.69684 | K05917 | cytochrome P450                                                        | um11386   | 0.55602 | K13704 | conserved hypothetical protein                                                                                |
| 20c00038  | 0.70182 | ni     | hypothetical protein                                                   | um04590   | 0.55631 | K17103 | related to CHO1 - CDP-diacylglycerol serine O-phosphatidyltransferase                                         |
| 22a00023  | 0.70316 | ni     | hypothetical protein                                                   | um04241   | 0.5564  | ni     | putative protein                                                                                              |
| 9a00131   | 0.70437 | K15122 | predicted divalent cation transporter                                  | um11184   | 0.55664 | ni     | conserved hypothetical protein                                                                                |
| 52a000001 | 0.70823 | K02128 | ni                                                                     | um06014   | 0.55673 | ni     | putative protein                                                                                              |
| 9c00411   | 0.70932 | ni     | hypothetical protein                                                   | um04537   | 0.55678 | ni     | putative protein                                                                                              |
| 7a00020   | 0.71079 | K06674 | structural maintenance of chromosome protein 2                         | um00410   | 0.55693 | ni     | conserved hypothetical protein                                                                                |
| 10a00033  | 0.71098 | K01868 | thromboxin synthetase                                                  | um01081   | 0.55706 | K10684 | related to AOS1 - Smi3p activating protein                                                                    |
| 9a00078   | 0.71168 | ni     | hypothetical protein                                                   | um11633   | 0.55784 | ni     | putative protein                                                                                              |
| 27c00058  | 0.7132  | K12849 | predicted PRP38-like splicing factor                                   | um03772   | 0.55857 | K01930 | related to tetrahydrofolylpolyglutamate synthase                                                              |
| 9a00177   | 0.71349 | ni     | hypothetical protein                                                   | um06308   | 0.55861 | ni     | putative protein                                                                                              |
| 4a00007   | 0.71384 | ni     | hypothetical protein                                                   | um01795   | 0.55864 | ni     | conserved hypothetical protein                                                                                |
| 24a00003  | 0.71398 | ni     | predicted transporter                                                  | um06372   | 0.55893 | ni     | conserved hypothetical protein                                                                                |
| 14c00019  | 0.71544 | ni     | hypothetical protein                                                   | um00836   | 0.55948 | ni     | conserved hypothetical protein                                                                                |
| 7c00061   | 0.71686 | K07566 | RNA binding/translational regulation protein                           | um05542   | 0.55958 | K15205 | conserved hypothetical protein                                                                                |
| 17a00001  | 0.71708 | ni     | predicted transporter ADD1                                             | um00042   | 0.56082 | ni     | related to L-serine dehydratase 1                                                                             |
| 7a00151   | 0.71724 | ni     | hypothetical protein                                                   | um10668   | 0.56106 | ni     | related to Shuttle craft protein                                                                              |
| 21a00001  | 0.71813 | ni     | hypothetical protein                                                   | um06113   | 0.56107 | ni     | hypothetical protein                                                                                          |
| 6c00066   | 0.71889 | K08856 | serine/threonine protein kinase                                        | um11437   | 0.56121 | ni     | probable FRQ1 - regulator of phosphatidylinositol-4-OH kinase protein                                         |
| 7c00242   | 0.71925 | K00993 | sn-1,2-diacylglycerol ethanolamine- and cholinephosphotransferase      | um00858   | 0.56131 | ni     | hypothetical protein                                                                                          |
| 14a00038  | 0.72071 | K00948 | ribose-phosphate pyrophosphokinase                                     | um01107   | 0.56162 | ni     | related to Exocyst complex component Sec3                                                                     |
| 11a00082  | 0.72526 | K04640 | G-protein alpha subunit                                                | um11938   | 0.56192 | ni     | conserved hypothetical protein                                                                                |
| 5c00096   | 0.72631 | ni     | nuclear distribution protein NUDC                                      | um11468   | 0.56221 | K01613 | related to PSD1 - phosphatidylserine decarboxylase 1                                                          |
| 6c00060   | 0.72791 | ni     | aspartyl protease                                                      | um12151   | 0.56261 | K15710 | related to SNF2 family helicase                                                                               |
| 13a00039  | 0.72917 | ni     | hypothetical protein                                                   | um05167   | 0.56272 | ni     | conserved hypothetical protein                                                                                |
| 15a00087  | 0.72941 | ni     | cytochrome P450 CYP3/CYP5/CYP6/CYP9 subfamilies                        | um03828   | 0.56295 | ni     | hypothetical protein                                                                                          |
| 15c00118  | 0.72959 | K17260 | actin-related protein Arp2/3 complex, subunit Arp2                     | um04558   | 0.56296 | ni     | related to WVD40 protein Ciao1                                                                                |
| 12a00123  | 0.73007 | ni     | hypothetical protein                                                   | um10078   | 0.56317 | ni     | hypothetical protein                                                                                          |
| 9a00054   | 0.73029 | ni     | hypothetical protein                                                   | um01797   | 0.56354 | ni     | conserved hypothetical protein                                                                                |
| 5c00161   | 0.73118 | ni     | hypothetical protein                                                   | um04509   | 0.56403 | K14306 | related to Nucleoporin NSP1                                                                                   |
| 7a00209   | 0.73153 | K11373 | cAMP-dependent protein kinase catalytic subunit                        | um05215   | 0.56411 | ni     | putative protein                                                                                              |
| 19a00080  | 0.73263 | ni     | hypothetical protein                                                   | um06323   | 0.56424 | K03252 | probable translation initiation factor eIF3                                                                   |
| 9a00040   | 0.73409 | ni     | hypothetical protein                                                   | um11864   | 0.56425 | ni     | related to MDM31 - Mitochondrial inner membrane protein required for mitochondrial morphology and inheritance |
| 14a00042  | 0.73425 | ni     | predicted transporter                                                  | um00879   | 0.56446 | ni     | conserved hypothetical protein                                                                                |
| 12a00103  | 0.73502 | ni     | hypothetical protein                                                   | um02883   | 0.56455 | K09548 | related to Prefoldin subunit 1                                                                                |
| 10a00050  | 0.73571 | ni     | hypothetical protein                                                   | um10204   | 0.565   | K16365 | conserved hypothetical protein                                                                                |
| 15c00033  | 0.73644 | K12821 | spliceosomal protein FBP11                                             | um01680   | 0.5651  | ni     | conserved hypothetical protein                                                                                |
| 26c00009  | 0.74028 | ni     | hypothetical protein                                                   | um02725   | 0.56523 | K11996 | related to molybdenum cofactor biosynthetic protein                                                           |
| 25c00054  | 0.74097 | ni     | hypothetical protein                                                   | um05155   | 0.56555 | ni     | hypothetical protein                                                                                          |
| 22c00318  | 0.74097 | K12778 | putative steroid membrane receptor Hsp6.6/25-Dx                        | um01080   | 0.56562 | K13524 | 4-aminobutyrate aminotransferase                                                                              |
| 7a00047   | 0.7449  | K01293 | aminocyclase CY1 and related metallooxpeptidases                       | um01494   | 0.56602 | ni     | conserved hypothetical protein                                                                                |
| 12c00136  | 0.74542 | K00134 | glyceraldehyde 3-phosphate dehydrogenase                               | um12256   | 0.56628 | ni     | hypothetical protein                                                                                          |
| 9a00184   | 0.7479  | ni     | uncharacterized Fe-S protein                                           | um01266   | 0.56631 | K12864 | conserved hypothetical protein                                                                                |
| 11c00065  | 0.74857 | ni     | hypothetical protein                                                   | um00774   | 0.56631 | K04392 | Rac1 GTP binding protein                                                                                      |
| 8a00106   | 0.75034 | ni     | hypothetical protein                                                   | um04911   | 0.56637 | K10534 | serine reductase                                                                                              |
| 18a00052  | 0.75032 | K00555 | RNA methyltransferase                                                  | um00040   | 0.56643 | K08528 | conserved hypothetical protein                                                                                |
| 27c00083  | 0.75467 | K03644 | lipote synth                                                           |           |         |        |                                                                                                               |

|          |         |        |                                                                    |           |         |        |                                                                               |
|----------|---------|--------|--------------------------------------------------------------------|-----------|---------|--------|-------------------------------------------------------------------------------|
| 19c00092 | 0.80205 | K14790 | hypothetical protein                                               | um00874   | 0.57193 | ni     | hypothetical protein                                                          |
| 22d00059 | 0.80833 | ni     | hypothetical protein                                               | um10488   | 0.57242 | ni     | conserved hypothetical protein                                                |
| 14d00020 | 0.81667 | ni     | predicted RNA-binding protein involved in translational regulation | um04132   | 0.57269 | ni     | hypothetical protein                                                          |
| 9d000391 | 0.81716 | K14961 | WD40 repeat protein                                                | um02473   | 0.57286 | ni     | conserved hypothetical Ustilago-specific protein                              |
| 27d00054 | 0.82754 | ni     | hypothetical protein                                               | um04611   | 0.5729  | K03094 | probable negative regulator sulfur controller-3                               |
| 4c00004  | 0.84019 | K03681 | exosomal 3'-5' exonuclease complex subunit Rrp40                   | um10299   | 0.57322 | ni     | conserved hypothetical protein                                                |
| 5c00032  | 0.84721 | K14863 | microtubule binding protein YTM1                                   | um02591   | 0.57327 | K06670 | related to Double-strand-break repair protein rad21                           |
| 15d00037 | 0.84788 | ni     | hypothetical protein                                               | um05800   | 0.5733  | ni     | probable zinc metallo-protease                                                |
| 3c00007  | 0.85283 | ni     | members of tubulin                                                 | um10571   | 0.57354 | ni     | related to Rab proteins geranyltransferase component A 2                      |
| 7d000317 | 0.89172 | K05863 | mitochondrial ADP/ATP carrier proteins                             | um11062   | 0.57402 | ni     | hypothetical protein                                                          |
|          |         |        |                                                                    | um00725   | 0.57403 | K14769 | conserved hypothetical protein                                                |
|          |         |        |                                                                    | um04225.2 | 0.57443 | ni     | related to conserved oligomeric Golgi complex component 4                     |
|          |         |        |                                                                    | um00091   | 0.57557 | ni     | putative protein                                                              |
|          |         |        |                                                                    | um05232   | 0.57575 | K01768 | adenylate cyclase                                                             |
|          |         |        |                                                                    | um11615.2 | 0.57596 | K03357 | related to anaphase promoting complex subunit 10                              |
|          |         |        |                                                                    | um00728   | 0.57603 | K02606 | related to Origin recognition complex subunit 4                               |
|          |         |        |                                                                    | um01896   | 0.57657 | ni     | related to PET191 - involved in assembly of cytochrome oxidase                |
|          |         |        |                                                                    | um12193.2 | 0.57673 | ni     | related to multidrug resistant protein                                        |
|          |         |        |                                                                    | um05648   | 0.57678 | ni     | putative protein                                                              |
|          |         |        |                                                                    | um10997   | 0.57709 | ni     | putative protein                                                              |
|          |         |        |                                                                    | um00694   | 0.57736 | K07442 | related to GCD14 - translational repressor of GCN4                            |
|          |         |        |                                                                    | um00467   | 0.57767 | ni     | conserved hypothetical protein                                                |
|          |         |        |                                                                    | um01049   | 0.57771 | K00249 | probable acyl-CoA dehydrogenase                                               |
|          |         |        |                                                                    | um00405   | 0.57794 | ni     | conserved hypothetical protein                                                |
|          |         |        |                                                                    | um01673   | 0.57801 | K14546 | related to UTP5 - U3 snoRNP protein                                           |
|          |         |        |                                                                    | um10856   | 0.57869 | K12389 | related to YHC3 - protein involved in vacuolar arginine transport             |
|          |         |        |                                                                    | um04911   | 0.5787  | ni     | hypothetical protein                                                          |
|          |         |        |                                                                    | um10301   | 0.57908 | ni     | hypothetical protein                                                          |
|          |         |        |                                                                    | um11301   | 0.57935 | K11796 | probable SNF2 - component of SWI                                              |
|          |         |        |                                                                    | um04975   | 0.57988 | ni     | conserved hypothetical protein                                                |
|          |         |        |                                                                    | um10847   | 0.58002 | K02732 | probable FRE7 - 20S proteasome subunit                                        |
|          |         |        |                                                                    | um10773   | 0.5801  | ni     | related to MRPS9 - mitochondrial ribosomal protein                            |
|          |         |        |                                                                    | um11072   | 0.58045 | ni     | hypothetical protein                                                          |
|          |         |        |                                                                    | um02500   | 0.58091 | K11423 | related to SET2 - Histone methyltransferase                                   |
|          |         |        |                                                                    | um03237   | 0.58144 | K02969 | probable 40s ribosomal protein s20                                            |
|          |         |        |                                                                    | um11265   | 0.58257 | ni     | probable ARP3 - actin related protein                                         |
|          |         |        |                                                                    | um02562   | 0.58263 | K03062 | probable RPT2 - 26S proteasome regulatory subunit                             |
|          |         |        |                                                                    | um00513   | 0.5827  | ni     | conserved hypothetical protein                                                |
|          |         |        |                                                                    | um10771   | 0.58444 | K03681 | related to RRP40 - protein involved in ribosomal RNA processing               |
|          |         |        |                                                                    | um00008   | 0.58448 | ni     | conserved hypothetical protein                                                |
|          |         |        |                                                                    | um01104   | 0.58473 | K03137 | conserved hypothetical protein                                                |
|          |         |        |                                                                    | um02999   | 0.58504 | ni     | conserved hypothetical protein                                                |
|          |         |        |                                                                    | um03231   | 0.58505 | ni     | conserved hypothetical Ustilago-specific protein                              |
|          |         |        |                                                                    | um01154   | 0.58556 | K10967 | probable KRE2 - alpha-1                                                       |
|          |         |        |                                                                    | um00329   | 0.58575 | ni     | related to exocyst complex 100 kDa component                                  |
|          |         |        |                                                                    | um05352   | 0.58575 | K09584 | related to MPD1 - Disulfide isomerase related protein                         |
|          |         |        |                                                                    | um05197   | 0.58587 | ni     | conserved hypothetical protein                                                |
|          |         |        |                                                                    | um10349   | 0.58602 | ni     | putative protein                                                              |
|          |         |        |                                                                    | um10152   | 0.58617 | ni     | cytokinesis protein Don1                                                      |
|          |         |        |                                                                    | um05317   | 0.5862  | ni     | conserved hypothetical Ustilago-specific protein                              |
|          |         |        |                                                                    | um11937   | 0.58622 | ni     | probable APS1 - AP-1 complex subunit                                          |
|          |         |        |                                                                    | um00618   | 0.587   | K00766 | related to TRP4 - anthranilate phosphoribosyltransferase                      |
|          |         |        |                                                                    | um10161   | 0.58701 | ni     | conserved hypothetical protein                                                |
|          |         |        |                                                                    | um10158   | 0.58723 | ni     | probable adapter-related protein complex 1 beta 1 subunit                     |
|          |         |        |                                                                    | um00076   | 0.58729 | ni     | ni                                                                            |
|          |         |        |                                                                    | um06473   | 0.58792 | K00495 | related to Cytochrome P450                                                    |
|          |         |        |                                                                    | um00822   | 0.58793 | ni     | conserved hypothetical protein                                                |
|          |         |        |                                                                    | um10531   | 0.58809 | ni     | putative protein                                                              |
|          |         |        |                                                                    | um02685   | 0.5881  | ni     | conserved hypothetical protein                                                |
|          |         |        |                                                                    | um11043   | 0.58817 | K11088 | related to small nuclear ribonucleoprotein sm d3                              |
|          |         |        |                                                                    | um00629   | 0.5887  | ni     | hypothetical protein                                                          |
|          |         |        |                                                                    | um10578   | 0.58875 | ni     | related to PRIB protein                                                       |
|          |         |        |                                                                    | um12311   | 0.58885 | ni     | hypothetical protein                                                          |
|          |         |        |                                                                    | um10957   | 0.58944 | K17261 | probable adenylyl-cyclase-associated protein CAP                              |
|          |         |        |                                                                    | um03089   | 0.58946 | ni     | conserved hypothetical protein                                                |
|          |         |        |                                                                    | um10307   | 0.58956 | ni     | conserved hypothetical protein                                                |
|          |         |        |                                                                    | um11853   | 0.58963 | ni     | hypothetical protein                                                          |
|          |         |        |                                                                    | um05283   | 0.58998 | ni     | probable RVS161 - protein involved in cell polarity development               |
|          |         |        |                                                                    | um01041   | 0.59041 | ni     | hypothetical protein                                                          |
|          |         |        |                                                                    | um03250   | 0.59057 | ni     | conserved hypothetical protein                                                |
|          |         |        |                                                                    | um03201   | 0.59083 | ni     | hypothetical protein                                                          |
|          |         |        |                                                                    | um05896   | 0.5909  | ni     | putative protein                                                              |
|          |         |        |                                                                    | um05065   | 0.59094 | ni     | related to SPT23 - suppressor of TY retrotransposon                           |
|          |         |        |                                                                    | um06089   | 0.59098 | ni     | conserved hypothetical protein                                                |
|          |         |        |                                                                    | um04065   | 0.59167 | ni     | conserved hypothetical protein                                                |
|          |         |        |                                                                    | um02857   | 0.5926  | ni     | conserved hypothetical protein                                                |
|          |         |        |                                                                    | um05924   | 0.59282 | ni     | probable ADK2 - adenylylase kinase                                            |
|          |         |        |                                                                    | um00321   | 0.59338 | K15541 | conserved hypothetical protein                                                |
|          |         |        |                                                                    | um01731   | 0.59342 | ni     | hypothetical protein                                                          |
|          |         |        |                                                                    | um02784   | 0.5946  | ni     | putative protein                                                              |
|          |         |        |                                                                    | um12254   | 0.59514 | K11238 | sepa-related Formin                                                           |
|          |         |        |                                                                    | um10194   | 0.59665 | K03007 | probable DNA-directed RNA polymerase II chain RPB10                           |
|          |         |        |                                                                    | um10089.2 | 0.59677 | ni     | related to muconate cycloisomerase                                            |
|          |         |        |                                                                    | um11839.2 | 0.59729 | K15278 | hypothetical protein                                                          |
|          |         |        |                                                                    | um01503   | 0.59779 | ni     | conserved hypothetical protein                                                |
|          |         |        |                                                                    | um05054   | 0.59779 | ni     | conserved hypothetical protein                                                |
|          |         |        |                                                                    | um03312   | 0.5983  | ni     | putative protein                                                              |
|          |         |        |                                                                    | um04609   | 0.59914 | ni     | conserved hypothetical protein                                                |
|          |         |        |                                                                    | um00378   | 0.59916 | K03678 | probable RRF45 - Exosome complex exonuclease                                  |
|          |         |        |                                                                    | um01013   | 0.59952 | ni     | putative protein                                                              |
|          |         |        |                                                                    | um11256   | 0.5997  | ni     | related to D-arabinitol 2-dehydrogenase                                       |
|          |         |        |                                                                    | um11656   | 0.6007  | ni     | conserved hypothetical protein                                                |
|          |         |        |                                                                    | um06315   | 0.60182 | ni     | hypothetical protein                                                          |
|          |         |        |                                                                    | um02102   | 0.60224 | K11407 | related to HD41 - histone deacetylase A                                       |
|          |         |        |                                                                    | um03536   | 0.6027  | ni     | related to Zinc finger protein SFP1                                           |
|          |         |        |                                                                    | um06135   | 0.60359 | ni     | conserved hypothetical protein                                                |
|          |         |        |                                                                    | um10761   | 0.60376 | ni     | conserved hypothetical protein                                                |
|          |         |        |                                                                    | um01573.2 | 0.60408 | ni     | related to Vacuolar membrane protein                                          |
|          |         |        |                                                                    | um00244   | 0.6042  | ni     | conserved hypothetical protein                                                |
|          |         |        |                                                                    | um05273   | 0.60436 | ni     | related to dipeptidyl aminopeptidase B                                        |
|          |         |        |                                                                    | um10305   | 0.60542 | ni     | related to GYP7 - GTPase-activating protein for Ypt7p                         |
|          |         |        |                                                                    | um10594   | 0.60571 | ni     | hypothetical protein                                                          |
|          |         |        |                                                                    | um05781.2 | 0.60587 | ni     | hypothetical protein                                                          |
|          |         |        |                                                                    | um00880   | 0.60664 | K05542 | related to tRNA dihydrouridine synthase                                       |
|          |         |        |                                                                    | um04042   | 0.60745 | ni     | conserved hypothetical protein                                                |
|          |         |        |                                                                    | um04473   | 0.60775 | ni     | conserved hypothetical protein                                                |
|          |         |        |                                                                    | um01712   | 0.60772 | ni     | conserved hypothetical protein                                                |
|          |         |        |                                                                    | um06257   | 0.60781 | ni     | conserved hypothetical protein                                                |
|          |         |        |                                                                    | um05166   | 0.6079  | K14439 | related to FUN30 - protein important for chromosome integrity and segregation |
|          |         |        |                                                                    | um01338   | 0.60812 | K14967 | conserved hypothetical protein                                                |
|          |         |        |                                                                    | um00002   | 0.6083  | K06916 | related to AFG1 - ATPase family gene                                          |
|          |         |        |                                                                    | um03694   | 0.60877 | ni     | hypothetical protein                                                          |
|          |         |        |                                                                    | um02357   | 0.609   | K04441 | probable osmotic sensitive-2 protein                                          |
|          |         |        |                                                                    | um03393   | 0.60904 | ni     | hypothetical protein                                                          |
|          |         |        |                                                                    | um04907   | 0.60911 | ni     | conserved hypothetical protein                                                |
|          |         |        |                                                                    | um05214   | 0.60938 | K14777 | probable DEAD box protein                                                     |
|          |         |        |                                                                    | um02913   | 0.60938 | K06963 | conserved hypothetical protein                                                |
|          |         |        |                                                                    | um03757   | 0.6095  | ni     | hypothetical protein                                                          |
|          |         |        |                                                                    | um01167   | 0.6105  | ni     | hypothetical protein                                                          |
|          |         |        |                                                                    | um04118   | 0.61076 | ni     | conserved hypothetical protein                                                |
|          |         |        |                                                                    | um11584   | 0.61113 | ni     | related to 50S ribosomal protein L22                                          |
|          |         |        |                                                                    | um00449   | 0.61147 | ni     | ni                                                                            |
|          |         |        |                                                                    | um05782   | 0.61229 | ni     | capsule-associated protein-like protein                                       |
|          |         |        |                                                                    | um04927   | 0.6129  | K10732 | conserved hypothetical protein                                                |
|          |         |        |                                                                    | um06336   | 0.6129  | ni     | conserved hypothetical protein                                                |
|          |         |        |                                                                    | um01176.2 | 0.61308 | ni     | putative protein                                                              |
|          |         |        |                                                                    | um00120   | 0.61394 | ni     | conserved hypothetical protein                                                |
|          |         |        |                                                                    | um04931   | 0.61467 | K00888 | related to PIK1 - phosphatidylinositol 4-kinase                               |
|          |         |        |                                                                    | um05395   | 0.61531 | ni     | conserved hypothetical protein                                                |
|          |         |        |                                                                    | um02059   | 0.61612 | K03024 | related to RPO31 - DNA-directed RNA polymerase III                            |
|          |         |        |                                                                    | um01219   | 0.61695 | ni     | conserved hypothetical protein                                                |
|          |         |        |                                                                    | um11831   | 0.61713 | ni     | related to NADH                                                               |
|          |         |        |                                                                    | um10294   | 0.61751 | ni     | conserved hypothetical protein                                                |
|          |         |        |                                                                    | um11587   | 0.61831 | ni     | putative protein                                                              |
|          |         |        |                                                                    | um01900   | 0.61873 | ni     | conserved hypothetical protein                                                |
|          |         |        |                                                                    | um11876   | 0.61888 | K10426 | related to dynactin subunit p62                                               |
|          |         |        |                                                                    | um10217   | 0.61914 | ni     | probable aldehyde dehydrogenase                                               |
|          |         |        |                                                                    | um05721   | 0.61944 | ni     | putative protein                                                              |
|          |         |        |                                                                    | um11217   | 0.61984 | K03963 | conserved hypothetical protein                                                |
|          |         |        |                                                                    | um00957   | 0.62028 | ni     | related to serine                                                             |
|          |         |        |                                                                    | um02244   | 0.6204  | ni     | related to ser                                                                |
|          |         |        |                                                                    | um10555   | 0.62081 | ni     | conserved hypothetical protein                                                |
|          |         |        |                                                                    | um02367   | 0.62082 | ni     | conserved hypothetical protein                                                |
|          |         |        |                                                                    | um12018   | 0.62103 | ni     | putative protein                                                              |
|          |         |        |                                                                    | um05260   | 0.62138 | ni     | related to inorganic phosphate transporter                                    |
|          |         |        |                                                                    | um10723   | 0.62194 | ni     | conserved hypothetical protein                                                |
|          |         |        |                                                                    | um03463   | 0.62214 | K15728 | related to SMP2 protein                                                       |
|          |         |        |                                                                    | um06083   | 0.62319 | K01593 | related to Aromatic-L-amino-acid decarboxylase                                |
|          |         |        |                                                                    | um06287   | 0.62381 | ni     | related to Phytoene synthase                                                  |
|          |         |        |                                                                    | um10902.2 | 0.62388 | K12876 | related to Y14                                                                |
|          |         |        |                                                                    | um01297   | 0.62441 | ni     | conserved hypothetical Ustilago-specific protein                              |
|          |         |        |                                                                    | um00699   | 0.62627 | K13118 | related to protein DGCR14                                                     |
|          |         |        |                                                                    | um01148   | 0.62639 | ni     | putative protein                                                              |
|          |         |        |                                                                    | um05322   | 0.6265  | ni     | hypothetical protein                                                          |
|          |         |        |                                                                    | um10831   | 0.62653 | ni     | conserved hypothetical protein                                                |
|          |         |        |                                                                    | um02397   | 0.62763 | ni     | conserved hypothetical protein                                                |

|           |         |        |                                                                                                               |
|-----------|---------|--------|---------------------------------------------------------------------------------------------------------------|
| um05872   | 0.62764 | ni     | putative protein                                                                                              |
| um11094   | 0.62767 | ni     | hypothetical protein                                                                                          |
| um10434   | 0.62823 | K03234 | probable EFT2 - translation elongation factor eEF2                                                            |
| um02926   | 0.62855 | ni     | conserved hypothetical protein                                                                                |
| um05408   | 0.62888 | K11839 | related to Ubiquitin carboxyl-terminal hydrolase 4                                                            |
| um11091   | 0.62907 | ni     | related to GYP5 - GTPase-activating protein                                                                   |
| um12189   | 0.62913 | ni     | conserved hypothetical protein                                                                                |
| um11604   | 0.62919 | ni     | related to Ferric reductase transmembrane component 1 precursor                                               |
| um05932   | 0.62921 | ni     | hypothetical protein                                                                                          |
| um02983   | 0.62936 | ni     | conserved hypothetical protein                                                                                |
| um10626   | 0.63021 | ni     | conserved hypothetical protein                                                                                |
| um15020   | 0.63059 | ni     | conserved hypothetical protein                                                                                |
| um11389   | 0.63229 | ni     | related to DnaJ-like protein                                                                                  |
| um05462   | 0.63236 | ni     | ni                                                                                                            |
| um11779   | 0.63247 | K11367 | probable CHD1 - transcriptional regulator                                                                     |
| um04297   | 0.63416 | ni     | conserved hypothetical protein                                                                                |
| um04020   | 0.63497 | ni     | conserved hypothetical protein                                                                                |
| um10917   | 0.63641 | K03868 | probable RING-box protein 1                                                                                   |
| um03766   | 0.63683 | K03504 | conserved hypothetical protein                                                                                |
| um03138   | 0.63683 | ni     | hypothetical protein                                                                                          |
| um10681   | 0.63732 | K00053 | probable ILV5 - keto-acid reductoisomerase                                                                    |
| um00006   | 0.63735 | ni     | conserved hypothetical protein                                                                                |
| um03833   | 0.63775 | K07874 | probable GTP-binding protein ypt1                                                                             |
| um05014   | 0.63778 | ni     | related to Serine                                                                                             |
| um11865   | 0.63785 | ni     | putative protein                                                                                              |
| um03965.2 | 0.63865 | ni     | conserved hypothetical protein                                                                                |
| um10603.2 | 0.63866 | ni     | hypothetical protein                                                                                          |
| um01891   | 0.63891 | K03596 | probable GUF1 - GTP-binding protein                                                                           |
| um05348   | 0.64013 | K05954 | related to RAM1 - protein farnesyltransferase                                                                 |
| um01426   | 0.64143 | ni     | ni                                                                                                            |
| um11566   | 0.64192 | K07511 | probable enoyl-CoA hydratase precursor                                                                        |
| um12153   | 0.64289 | ni     | conserved hypothetical protein                                                                                |
| um05110   | 0.64375 | K14555 | related to UTP13 - U3 snoRNP protein                                                                          |
| um04637   | 0.64434 | ni     | conserved hypothetical protein                                                                                |
| um03450   | 0.64579 | K14535 | related to FAP7 - involved in the oxidative stress response                                                   |
| um11670   | 0.64599 | ni     | putative protein                                                                                              |
| um01344   | 0.64654 | ni     | related to TIM50 - mitochondrial inner membrane import translocase subunit                                    |
| um11230   | 0.64862 | ni     | related to protein disulfide isomerase                                                                        |
| um03948   | 0.64958 | ni     | conserved hypothetical protein                                                                                |
| um02379   | 0.64876 | ni     | conserved hypothetical protein                                                                                |
| um11661.2 | 0.65002 | K01194 | probable Neutral trehalase                                                                                    |
| um00656   | 0.6521  | ni     | related to YSC84 - protein involved in the organization of the actin cytoskeleton                             |
| um04655   | 0.65231 | ni     | conserved hypothetical protein                                                                                |
| um03361   | 0.6524  | K17301 | probable SEC26 - coatomer complex beta chain of secretory pathway vesicles                                    |
| um11918   | 0.65335 | ni     | conserved hypothetical protein                                                                                |
| um12323   | 0.65363 | ni     | hypothetical protein                                                                                          |
| um03722   | 0.65398 | ni     | related to conserved oligomeric Golgi complex component 2                                                     |
| um02296   | 0.65479 | ni     | hypothetical protein                                                                                          |
| um10490.2 | 0.65568 | ni     | putative protein                                                                                              |
| um05575   | 0.65618 | ni     | conserved hypothetical protein                                                                                |
| um01145   | 0.65823 | ni     | hypothetical protein                                                                                          |
| um12253   | 0.66126 | ni     | conserved hypothetical Ustilago-specific protein                                                              |
| um11867   | 0.66137 | K14536 | translation elongation factor 2 - putative                                                                    |
| um04712   | 0.66262 | ni     | related to N-methyltransferase                                                                                |
| um05411   | 0.66278 | ni     | probable quinase permease                                                                                     |
| um02687   | 0.66281 | ni     | conserved hypothetical protein                                                                                |
| um03454   | 0.664   | ni     | related to ATP-binding cassette                                                                               |
| um04817   | 0.66461 | ni     | related to TOS3 - protein localized to membranes                                                              |
| um11630   | 0.66483 | K07107 | conserved hypothetical protein                                                                                |
| um11833   | 0.66591 | K12847 | related to SAD1 - protein required for assembly of U4 snRNA into the U4                                       |
| um04969   | 0.66696 | K03240 | related to Translation initiation factor eIF-2B epsilon subunit                                               |
| um06294   | 0.66779 | ni     | conserved hypothetical protein                                                                                |
| um05090   | 0.66798 | K02136 | probable ATP3 - F1FO-ATPase complex                                                                           |
| um02620   | 0.668   | ni     | conserved hypothetical protein                                                                                |
| um03873   | 0.66974 | K00761 | probable FUR1 - uracil phosphoribosyltransferase                                                              |
| um02606   | 0.66984 | K11137 | hypothetical protein                                                                                          |
| um10607   | 0.67073 | K03948 | related to NADH-ubiquinone oxidoreductase MLRQ subunit                                                        |
| um02759   | 0.67314 | ni     | hypothetical protein                                                                                          |
| um10728   | 0.67362 | ni     | hypothetical protein                                                                                          |
| um05137   | 0.67399 | K02998 | probable 40S ribosomal protein s0                                                                             |
| um04249   | 0.67414 | ni     | probable beta-actinin                                                                                         |
| um03483   | 0.67445 | ni     | hypothetical protein                                                                                          |
| um03866   | 0.67457 | K14557 | related to UTP6 - U3 snoRNP protein                                                                           |
| um10400   | 0.67484 | ni     | related to triose phosphate                                                                                   |
| um06305   | 0.67588 | ni     | conserved hypothetical protein                                                                                |
| um00523   | 0.67615 | K12605 | related to CD38 - transcription factor                                                                        |
| um04802   | 0.67631 | K02265 | probable COX4 - cytochrome-c oxidase chain IV                                                                 |
| um05579   | 0.6764  | ni     | conserved hypothetical protein                                                                                |
| um04943   | 0.67641 | K02976 | probable 40S ribosomal protein S26                                                                            |
| um12156   | 0.67653 | ni     | putative protein                                                                                              |
| um11707   | 0.67737 | K14771 | conserved hypothetical protein                                                                                |
| um11083   | 0.67786 | ni     | related to p24 protein                                                                                        |
| um03943   | 0.68015 | ni     | conserved hypothetical protein                                                                                |
| um00684   | 0.68201 | ni     | conserved hypothetical protein                                                                                |
| um04883   | 0.68243 | ni     | conserved hypothetical protein                                                                                |
| um10017   | 0.68348 | ni     | conserved hypothetical protein                                                                                |
| um12213   | 0.68443 | ni     | conserved hypothetical protein                                                                                |
| um01053   | 0.68493 | ni     | hypothetical protein                                                                                          |
| um05259   | 0.68593 | ni     | conserved hypothetical protein                                                                                |
| um10687   | 0.68596 | K12184 | probable VPS28 - protein involved in vacuolar traffic                                                         |
| um12022   | 0.68657 | ni     | conserved hypothetical protein                                                                                |
| um01467   | 0.68744 | K14835 | probable NOP2 - nucleolar protein                                                                             |
| um01902.2 | 0.6879  | ni     | conserved hypothetical protein                                                                                |
| um05789   | 0.68894 | ni     | conserved hypothetical protein                                                                                |
| um06164   | 0.69015 | K12619 | related to dna exonuclease Dhp1p                                                                              |
| um04098   | 0.69108 | ni     | conserved hypothetical Ustilago-specific protein                                                              |
| um00299   | 0.69165 | ni     | conserved hypothetical protein                                                                                |
| um00691   | 0.69227 | ni     | related to cell wall protein UTR2                                                                             |
| um02174   | 0.69392 | ni     | hypothetical protein                                                                                          |
| um00084.2 | 0.69404 | ni     | hypothetical protein                                                                                          |
| um03389   | 0.69553 | ni     | hypothetical protein                                                                                          |
| um03763   | 0.69745 | ni     | conserved hypothetical protein                                                                                |
| um03939   | 0.69863 | K14838 | related to NOP15 - protein involved in 60S ribosomal subunit biogenesis                                       |
| um11163.2 | 0.70091 | K10838 | related to RAD4 - Excision repair protein                                                                     |
| um04701   | 0.70204 | K12606 | probable rcd1 protein involved in sexual development                                                          |
| um00344   | 0.70206 | ni     | putative protein                                                                                              |
| um01661   | 0.70408 | ni     | hypothetical protein                                                                                          |
| um03277   | 0.70483 | K01164 | related to Ribonucleases P                                                                                    |
| um10180   | 0.70751 | K02139 | related to ATP17 - ATP synthase complex                                                                       |
| um01307   | 0.71102 | ni     | conserved hypothetical protein                                                                                |
| um11791   | 0.71283 | ni     | related to TRS31 - TRAPP subunit of 31 kDa involved in targeting and fusion of ER to golgi transport vesicles |
| um10893   | 0.71427 | ni     | guanylyl nucleotide exchange factor Sqj2                                                                      |
| um00395   | 0.71557 | ni     | probable Rds1 protein                                                                                         |
| um04234   | 0.71641 | ni     | related to histone deacetylase                                                                                |
| um05174   | 0.71868 | ni     | putative protein                                                                                              |
| um04913   | 0.71897 | ni     | related to TRM10 - tRNA methyltransferase                                                                     |
| um10807   | 0.71897 | K12856 | probable PRP8 - US snRNP protein                                                                              |
| um05849   | 0.72154 | ni     | hypothetical protein                                                                                          |
| um00181   | 0.72679 | ni     | putative protein                                                                                              |
| um04422   | 0.72863 | ni     | related to endo-1                                                                                             |
| um03202   | 0.72916 | ni     | conserved hypothetical Ustilago-specific protein                                                              |
| um11794   | 0.73293 | ni     | related to SCD6 - protein may bind RNA and have a role in RNA processing                                      |
| um10714   | 0.73639 | ni     | conserved hypothetical protein                                                                                |
| um01113   | 0.73706 | ni     | conserved hypothetical protein                                                                                |
| um03285   | 0.73924 | ni     | conserved hypothetical protein                                                                                |
| um10566   | 0.74094 | ni     | conserved hypothetical protein                                                                                |
| um10312   | 0.74221 | K11097 | probable small nuclear ribonucleoprotein E                                                                    |
| um04156   | 0.74252 | K01649 | probable LEU4 - 2-isopropylmalate synthase                                                                    |
| um04526.2 | 0.74563 | ni     | hypothetical protein                                                                                          |
| um05827   | 0.75368 | ni     | conserved hypothetical protein                                                                                |
| um06090   | 0.76378 | K03258 | conserved hypothetical protein                                                                                |
| um05062   | 0.76679 | K12194 | related to SNF7 protein                                                                                       |
| um04401   | 0.769   | K09500 | probable CCT8 - component of chaperonin-containing T-complex                                                  |
| um03643.2 | 0.77094 | ni     | conserved hypothetical protein                                                                                |
| um06290   | 0.77113 | ni     | conserved hypothetical protein                                                                                |
| um01659   | 0.77784 | ni     | hypothetical protein                                                                                          |
| um00915   | 0.78126 | ni     | conserved hypothetical protein                                                                                |
| um12036   | 0.78547 | ni     | conserved hypothetical protein                                                                                |
| um00847   | 0.78919 | ni     | putative protein                                                                                              |
| um05316   | 0.79433 | ni     | ni                                                                                                            |
| um10363   | 0.80358 | ni     | conserved hypothetical protein                                                                                |
| um11550   | 0.80724 | K03019 | probable Rgc11 - DNA-directed RNA polymerase III subunit C11                                                  |
| um01988   | 0.84368 | ni     | related to Oxidoreductase                                                                                     |
| um11535.2 | 0.89788 | K02958 | probable 40S ribosomal protein S15                                                                            |
| um11257.2 | 0.90601 | ni     | probable YAH1 - Ferredoxin of the mitochondrial matrix                                                        |
